# Supplementary material for: Proximity extracellular protein-protein interaction analysis of EGFR using AirID-conjugated fragment of antigen binding
Source: Nat Commun. 2023 Dec 14;14:8301. doi: 10.1038/s41467-023-43931-7 (PMC10721602; doi:10.1038/s41467-023-43931-7)
Supplement: Supplementary file 4 — Supplementary Data 1 [file 41467_2023_43931_MOESM4_ESM.xlsx]

## Sheet: peptideGroupe
Annotated Sequence	Modifications	# Proteins	# PSMs	Master Protein Accessions	Positions in Master Proteins	Modifications in Master Proteins	Master Protein Descriptions	# Missed Cleavages	Theo. MH+ [Da]	Abundance Ratio: (EGFR-FabID) / (AGIA-FabID)	Abundances (Grouped): 19 AGIA-FabID	Abundances (Grouped): 22 EGFR-FabID	Abundances (Scaled): F1: Sample, 19 AGIA-FabID n=1	Abundances (Scaled): F11: Sample, 19 AGIA-FabID n=2	Abundances (Scaled): F13: Sample, 19 AGIA-FabID n=3	Abundances (Scaled): F2: Sample, 22 EGFR-FabID n=1	Abundances (Scaled): F12: Sample, 22 EGFR-FabID n=2	Abundances (Scaled): F14: Sample, 22 EGFR-FabID n=3	Abundances (Normalized): F1: Sample, 19 AGIA-FabID n=1	Abundances (Normalized): F11: Sample, 19 EGFR-FabID n=2	Abundances (Normalized): F13: Sample, 19 EGFR-FabID n=3	Abundances (Normalized): F2: Sample, 22 EGFR-FabID n=1	Abundances (Normalized): F12: Sample, 22 EGFR-FabID n=2	Abundances (Normalized): F14: Sample, 22 EGFR-FabID n=3	Abundance: F1: Sample, 19 AGIA-FabID n=1	Abundance: F11: Sample, 19 AGIA-FabID n=2	Abundance: F13: Sample, 19 AGIA-FabID n=3	Abundance: F2: Sample, 22 EGFR-FabID n=1	Abundance: F12: Sample, 22 EGFR-FabID 2	Abundance: F14: Sample, 22 EGFR-FabID n=3	Found in Sample: [S1] F1: Sample, 19 AGIA-FabID n=1	Found in Sample: [S11] F11: Sample, 19 AGIA-FabID n=2	Found in Sample: [S13] F13: Sample, 19 AGIA-FabID n=3	Found in Sample: [S2] F2: Sample, 22 EGFR-FabID n=1	Found in Sample: [S12] F12: Sample, 22 EGFR-FabID n=2	Found in Sample: [S14] F14: Sample, 22 EGFR-FabID n=3	Confidence (by Search Engine): Sequest HT	Percolator q-Value (by Search Engine): Sequest HT	Percolator PEP (by Search Engine): Sequest HT	XCorr (by Search Engine): Sequest HT	Top Apex RT [min]
[K].TSTSPIVKSFNR.[N]	1xBiotin [K8]	1	28	EMab-134	EMab-134 [224-235]	EMab-134 1xBiotin [K231]	Light	1	1562.8	1000	0.2	199.8	0.1	0.2	0.2	184.1	209.5	205.9	2143.19	2912.56	4182.08	3.27915e+06	3.73314e+06	3.66769e+06				3.27915e+06	2.22482e+06	1.38362e+06	Not Found	Not Found	Not Found	High	High	High	High	0.0008826	3.711e-05	3.21	39.85
[K].DINVKWK.[I]	1xBiotin [K5]	1	23	EMab-134	EMab-134 [167-173]	EMab-134 1xBiotin [K171]	Light	1	1128.59	1000	0.1	199.9	0	0.2	0.1	245.2	167.1	187.4	4600.55	15829.8	12805.1	2.30354e+07	1.5698e+07	1.76113e+07		3891.33	3326.26	2.30354e+07	9.35546e+06	6.6438e+06	Not Found	Peak Found	Peak Found	High	High	High	High	0.0009289	0.006156	2.24	41.85
[K].DNSKSQVFLK.[M]	1xBiotin [K4]	1	16	EGFR-fabID	EGFR-fabID [91-100]	EGFR-fabID 1xBiotin [K94]	Heavy	1	1391.7	322.97	0.6	199.4	0.7	0.3	0.7	171.7	216.3	210.3	4771.97	2438.65	5153.68	1.25793e+06	1.58466e+06	1.5412e+06				1.25793e+06	944403	581412	Not Found	Not Found	Not Found	High	High	High	High	0.0008826	0.0004214	3.03	40.57
[R].HNSYTCEATHKTSTSPIVK.[S]	1xBiotin [K]; 1xCarbamidomethyl [C6]	1	13	EMab-134	EMab-134 [213-231]	EMab-134 1xBiotin [K]	Light	1	2387.11	215.553	0.9	199.1	1.1	1	0.7	208	184.3	205	5721.82	4977.23	3470.42	1.08869e+06	964371	1.07286e+06				1.08869e+06	574732	404732	Not Found	Not Found	Not Found	High	High	High	High	0.0008826	3.985e-08	5.68	29.98
[K].LLIKYASNLESGVPAR.[F]	1xBiotin [K4]	1	17	EMab-134	EMab-134 [70-85]	EMab-134 1xBiotin [K73]	Light	1	1957.06	155.048	1.3	198.7	1.8	1.2	1.1	218	189	189	3791.54	2579.18	2291.41	461177	399897	399838				461177	238325	150837	Not Found	Not Found	Not Found	High	High	High	High	0.0008826	7.58e-08	4.61	49.04
[K].WKIDGSER.[Q]	1xBiotin [K2]	1	4	EMab-134	EMab-134 [172-179]	EMab-134 1xBiotin [K173]	Light	1	1216.58	136.39	1.5	198.5	1.5	0.9	1.7	210.5	212.4	172.8	4863.66	2964.64	5437.24	663355	669302	544605				663355	398881	205450	Not Found	Not Found	Not Found	High	High	High	High	0.0009289	0.00378	2.28	36.88
[K].LFGTSGQKTK.[I]	1xBiotin [K]	3	24	P00533-1	P00533-1 [480-489]	P00533-1 1xBiotin [K]	epidermal growth factor receptor [OS=Homo sapiens]	1	1292.67	87.308	2.2	197.8	3.3	2.1	2.1	182.4	216.5	193.5	63889.8	40874.9	41712.4	3.56869e+06	4.23564e+06	3.78568e+06	13778.5	10048	10835.2	3.56869e+06	2.52429e+06	1428133	High	High	High	High	High	High	High	0.0008826	0.002103	2.33	32.96
[R].LSISKDNSK.[S]	1xBiotin [K5]	1	1	EGFR-fabID	EGFR-fabID [86-94]	EGFR-fabID 1xBiotin [K90]	Heavy	1	1217.62	78.806	2.5	197.5	2.4	3.7	1.9	185.4	182.2	224.4	3725.97	5845.28	3018.38	293627	288603	355316				293627	171998	134042	Not Found	Not Found	Not Found	High	Peak Found	Peak Found	High	0.0009289	0.01319	2.35	32.54
[-].MSILKIHAR.[E]	1xBiotin [K5]; 1xMet-loss+Acetyl [N-Term]	1	5	P06733-1	P06733-1 [1-9]	P06733-1 1xBiotin [K5]; 1xMet-loss+Acetyl [N-Term]	alpha-enolase [OS=Homo sapiens]	1	1205.68	56.927	3.8	196.2	2.3	3	3.9	310	152.5	128.4	2147.45	2815.9	3679.82	295103	145145	122248				295103	86501.5	46117.4	Not Found	Not Found	Not Found	High	High	High	High	0.0008826	0.00173	3.09	44.21
[K].KLFGTSGQK.[T]	1xBiotin [K1]	3	5	P00533-1	P00533-1 [479-487]	P00533-1 1xBiotin [K479]	epidermal growth factor receptor [OS=Homo sapiens]	1	1191.62	55.871	3.2	196.8	3.1	3.1	8.2	188.1	226.6	170.9	5310.34	5335.55	14292	326534	393435	296695			3712.48	326534	234474	111927	Not Found	Not Found	Peak Found	High	High	High	High	0.0008826	0.001183	2.38	35.12
[R].KFGDPVVQSDMK.[H]	1xBiotin [K1]; 1xOxidation [M11]	2	10	P0DMV8	P0DMV8 [77-88]	P0DMV8 1xBiotin [K77]	heat shock 70 kDa protein 1A [OS=Homo sapiens]	1	1592.74	49.236	3.2	196.8	2.7	2.8	6	277.1	176.5	134.8	2628.07	2727.08	5792.19	265881	169327	129396				265881	100913	48814	High	High	High	High	High	High	High	0.0008826	2.256e-05	3.89	36.39
[K].DHIMEIFSTYGKIK.[M]	1xBiotin [K]; 1xOxidation [M4]	3	15	Q15287-1	Q15287-1 [175-188]	Q15287-1 1xBiotin [K]	RNA-binding protein with serine-rich domain 1 [OS=Homo sapiens]	1	1923.93	38.251	5.1	194.9	2.7	5.5	17	115.9	246.9	212	2715.33	5678.34	17440.4	118764	252977	217200			4530.32	118764	150766	81937.6	Not Found	Not Found	Peak Found	High	High	High	High	0.0008826	1.169e-05	4.35	48.16
[K].EDAMKTK.[T]	1xBiotin [K5]; 1xOxidation [M4]	3	6	Q29983	Q29983 [171-177]	Q29983 1xBiotin [K175]	MHC class I polypeptide-related sequence A [OS=Homo sapiens]	1	1064.48	34.401	5	195	7.8	3.4	5.3	108.8	269	205.7	4943.55	2125.47	3336.29	68793.4	170061	130069				68793.4	101350	49067.8	Not Found	Not Found	Not Found	High	High	High	High	0.0009289	0.01264	1.65	17.2
[R].YTKLSDPANWLK.[I]	1xBiotin [K3]	2	7	P19022	P19022 [534-545]	P19022 1xBiotin [K536]	Cadherin-2 [OS=Homo sapiens]	1	1661.84	33.845	5.2	194.8	4.9	7.5	4.7	239.4	158.7	184.7	2788.3	4256.83	2644.68	135021	89508.7	104205				135021	53344.1	39310.9	Not Found	Not Found	Not Found	High	High	High	High	0.0008826	1.469e-05	3.75	52.85
[K].NQVALNPQNTVFDAKR.[L]	1xBiotin [K15]	2	10	P0DMV8	P0DMV8 [57-72]	P0DMV8 1xBiotin [K71]	heat shock 70 kDa protein 1A [OS=Homo sapiens]	1	2041.03	26.46	6.9	193.1	5.6	12.5	5.2	282.2	156.7	137.8	2530.8	5680.32	2365.1	128140	71179.5	62579.6				128140	42420.5	23607.9	Not Found	Not Found	Not Found	High	High	High	High	0.0008826	2.451e-07	4.71	44.26
[K].YQLKIK.[V]	1xBiotin [K4]	2	7	Q02487	Q02487 [319-324]	Q02487 1xBiotin [K322]	Desmocollin-2 [OS=Homo sapiens]	1	1018.58	25.834	7.5	192.5	7.9	7.1	7.8	164.7	201.2	211.3	24562.5	21853.2	24101.9	509879	622643	654004	5297.15	5372.03	6260.7	509879	371074	246720	Peak Found	Peak Found	High	High	High	High	High	0.00223	0.02498	1.69	37.1
[K].DHIMEIFSTYGKIK.[M]	1xBiotin [K]	3	3	Q15287-1	Q15287-1 [175-188]	Q15287-1 1xBiotin [K]	RNA-binding protein with serine-rich domain 1 [OS=Homo sapiens]	1	1907.94	23.22	8.3	191.7	7.6	6.3	44.7	176	202.2	163.2	2424.2	2015.99	14312.9	56289.6	64691.8	52192.2			3717.92	56289.6	38554	19689.3	Not Found	Not Found	Peak Found	High	High	Peak Found	High	0.0009289	0.01081	3.13	52.67
[K].VQKLLQDFFNGR.[D]	1xBiotin [K3]	2	5	P0DMV8	P0DMV8 [346-357]	P0DMV8 1xBiotin [K348]	heat shock 70 kDa protein 1A [OS=Homo sapiens]	1	1690.87	22.641	5.6	194.4	5.1	5.4	23.3	266.1	185.6	114.5	2206.08	2337.84	10162.2	116044	80931.1	49947.5			2639.74	116044	48232.1	18842.5	Not Found	Not Found	Peak Found	High	High	High	High	0.0008826	0.0001625	2.64	56.37
[K].KALAAAGYDVEK.[N]	1xBiotin [K1]	5	4	P10412; P16403	P10412 [64-75]; P16403 [64-75]	P10412 1xBiotin [K64]; P16403 1xBiotin [K64]	Histone H1.4 [OS=Homo sapiens] Histone H1.2 [OS=Homo sapiens]	1	1461.74	18.812	7.5	192.5	15.4	6.3	6.9	274.9	178.6	117.8	5265.74	2134.76	2364.22	93718	60874.8	40159.7				93718	36279.3	15150.1	Not Found	Not Found	Not Found	High	High	High	High	0.0008826	3.62e-06	3.86	36.69
[R].SKYKPTPIPIK.[V]	1xBiotin [K2]	1	3	Q14126	Q14126 [366-376]	Q14126 1xBiotin [K367]	Desmoglein-2 [OS=Homo sapiens]	1	1497.85	18.458	10.3	189.7	10.7	9	11.8	168.7	197.5	202.3	3140.8	2655.04	3461.6	49516.7	57972.4	59408.1				49516.7	34549.5	22411.5	Not Found	Not Found	Not Found	High	High	Peak Found	High	0.0008826	0.0004367	3	35.12
[K].SLVSKGTLVQTK.[G]	1xBiotin [K5]	5	4	P10412; P16403	P10412 [86-97]; P16403 [86-97]	P10412 1xBiotin [K90]; P16403 1xBiotin [K90]	Histone H1.4 [OS=Homo sapiens] Histone H1.2 [OS=Homo sapiens]	1	1486.83	17.354	15.4	184.6	6.7	14.1	15	280.1	168.6	115.6	2416.17	5103.5	5455.29	101600	61152.2	41931				101600	36444.6	15818.3	Not Found	Not Found	Not Found	High	High	High	High	0.0008826	0.0008044	2.44	41.02
[R].SLKEISDGDVIISGNK.[N]	1xBiotin [K3]	3	7	P00533-1	P00533-1 [452-467]	P00533-1 1xBiotin [K454]	epidermal growth factor receptor [OS=Homo sapiens]	1	1900.97	17.337	10.4	189.6	28.6	9.6	9.3	161.7	174.1	216.7	10874.8	3644.73	3552.59	61590.5	66284.5	82530.2	2345.26			61590.5	39503.3	31134.1	Peak Found	Not Found	Not Found	High	High	High	High	0.0008826	5.79e-06	3.99	44.47
[K].AGAVEKGVPLYR.[H]	1xBiotin [K6]	2	5	P06733-1	P06733-1 [121-132]	P06733-1 1xBiotin [K126]	alpha-enolase [OS=Homo sapiens]	1	1485.79	17.303	10.9	189.1	12.1	8.9	7.3	301.8	154.7	115.2	3507.29	2587.44	2107.78	87341.6	44771.3	33332.4				87341.6	26682.2	12574.5	Not Found	Not Found	Not Found	High	High	High	High	0.0008826	0.000283	2.62	40.37
[K].NLKLGIHEDSTNR.[R]	1xBiotin [K3]	1	3	P08238	P08238 [436-448]	P08238 1xBiotin [K438]	Heat shock protein HSP 90-beta [OS=Homo sapiens]	1	1722.86	17.044	11.1	188.9	7.9	10.9	13.6	291	186.5	90	2149.65	2960.42	3688.54	78723.8	50457.3	24344.3				78723.8	30070.8	9183.79	Not Found	Not Found	Not Found	High	High	Peak Found	High	0.0008826	0.0002206	3.11	35.26
[K].KHLEINPDHPIVETLR.[Q]	1xBiotin [K1]	1	4	P08238	P08238 [624-639]	P08238 1xBiotin [K624]	Heat shock protein HSP 90-beta [OS=Homo sapiens]	1	2137.12	16.597	11.4	188.6	8	8.3	17.5	330.9	137.6	97.7	3634.99	3763.1	7938.17	150135	62454.8	44334.7			2062.02	150135	37220.9	16725.1	Not Found	Not Found	Peak Found	High	High	High	High	0.0008826	1.07e-05	3.43	41.72
[K].LDKSQIHDIVLVGGSTR.[I]	1xBiotin [K3]	2	11	P11142-1	P11142-1 [326-342]	P11142-1 1xBiotin [K328]	Heat shock cognate 71 kDa protein [OS=Homo sapiens]	1	2064.09	16.229	11.6	188.4	4.1	25.7	8.1	130.8	302.4	128.8	2301.99	14354	4495.46	72954.9	168631	71828.7		3528.55		72954.9	100498	27097.1	Not Found	Peak Found	Not Found	High	High	High	High	0.0008826	8.572e-06	3.44	44.47
[K].HAVSEGTKAVTK.[Y]	1xBiotin [K8]	16	8	Q16778; P58876; Q93079	Q16778 [110-121]; P58876 [110-121]; Q93079 [110-121]	Q16778 1xBiotin [K117]; P58876 1xBiotin [K117]; Q93079 1xBiotin [K117]	Histone H2B type 2-E [OS=Homo sapiens] Histone H2B type 1-D [OS=Homo sapiens] Histone H2B type 1-H [OS=Homo sapiens]	1	1453.75	15.941	11.8	188.2	5.7	26.2	12.4	237.8	197.7	120.2	4910.46	22486.8	10655	204249	169852	103238		5527.79	2767.73	204249	101226	38945.9	Not Found	Peak Found	Peak Found	High	High	High	High	0.0008826	2.524e-05	4.38	22.37
[K].LGLKSLVSK.[G]	1xBiotin [K4]	5	4	P10412; P16403	P10412 [82-90]; P16403 [82-90]	P10412 1xBiotin [K85]; P16403 1xBiotin [K85]	Histone H1.4 [OS=Homo sapiens] Histone H1.2 [OS=Homo sapiens]	1	1170.69	14.79	11.6	188.4	9	18.9	9.8	278.9	158.9	124.6	2452.05	5147.96	2681.31	76140.6	43372.8	34003.7				76140.6	25848.7	12827.7	Not Found	Not Found	Not Found	High	High	High	High	0.0008826	0.002254	2.33	45.98
[R].QATKDAGVIAGLNVLR.[I]	1xBiotin [K4]	3	10	P0DMV8	P0DMV8 [156-171]	P0DMV8 1xBiotin [K159]	heat shock 70 kDa protein 1A [OS=Homo sapiens]	1	1852.01	14.64	12.8	187.2	11.1	6.2	36	284.3	162.2	100.3	3915.49	2178.31	12706.7	100463	57322.6	35436.8			3300.7	100463	34162.3	13368.4	Not Found	Not Found	Peak Found	High	High	High	High	0.0008826	1.414e-05	3.34	51.98
[K].IFVGGIKEDTEEHHLR.[D]	1xBiotin [K7]	6	6	P22626; P09651-1	P22626 [114-129]; P09651-1 [107-122]	P22626 1xBiotin [K120]; P09651-1 1xBiotin [K113]	heterogeneous nuclear ribonucleoproteins A2/B1 [OS=Homo sapiens] Heterogeneous nuclear ribonucleoprotein A1 [OS=Homo sapiens]	1	2106.04	14.345	11.5	188.5	9.7	9.4	19.2	267.1	159.2	135.4	2887.75	2805.32	5708.24	79402.2	47344.2	40242.7				79402.2	28215.5	15181.4	Not Found	Not Found	Not Found	High	High	Peak Found	High	0.0008826	0.0003602	2.12	40.27
[K].VDKKIVPR.[D]	2xBiotin [K3; K4]	1	5	EGFR-fabID	EGFR-fabID [232-239]	EGFR-fabID 2xBiotin [K234; K235]	Heavy	2	1406.76	13.717	13.6	186.4	13.5	12.5	12.6	225.5	172.8	163.1	5305.87	4897.14	4952.37	88623	67930.4	64110.4				88623	40484.2	24185.4	Not Found	Not Found	Not Found	High	High	High	High	0.0008826	0.0009645	3.11	40.78
[K].EDAMKTK.[T]	1xBiotin [K5]	3	3	Q29983	Q29983 [171-177]	Q29983 1xBiotin [K175]	MHC class I polypeptide-related sequence A [OS=Homo sapiens]	1	1048.48	13.465	15.8	184.2	16.6	9	16.1	223.4	187.4	147.5	5851.65	3162.03	5679.43	78794.6	66072.2	52021.5				78794.6	39376.8	19624.9	Not Found	Not Found	Not Found	High	High	High	High	0.0009289	0.00504	2.38	23.2
[R].KFSAPR.[H]	1xBiotin [K1]	2	2	P39023	P39023 [5-10]	P39023 1xBiotin [K5]	60S ribosomal protein L3 [OS=Homo sapiens]	1	931.482	13.143	14.1	185.9	12.8	12.7	9.5	290.5	167.1	107.3	3511.65	3476.73	2609.09	79420.6	45693.3	29327.3				79420.6	27231.6	11063.6	Not Found	Not Found	Not Found	High	Peak Found	High	High	0.002658	0.04668	1.46	29.43
[K].IAKTHEDIEAQIR.[E]	1xBiotin [K3]	2	1	O75533-1	O75533-1 [4-16]	O75533-1 1xBiotin [K6]	splicing factor 3B subunit 1 [OS=Homo sapiens]	1	1749.9	12.82	14.5	185.5	13.2	13.5	16.6	291.6	172.6	92.5	3195.11	3256.51	4010.7	70518.4	41747.6	22366.6				70518.4	24880.1	8437.68	Not Found	Not Found	Not Found	High	Peak Found	Peak Found	High	0.0008826	0.002168	1.86	33.99
[K].IVLQKYHTINGHNAEVR.[K]	1xBiotin [K5]	2	3	P22626	P22626 [169-185]	P22626 1xBiotin [K173]	heterogeneous nuclear ribonucleoproteins A2/B1 [OS=Homo sapiens]	1	2218.15	12.672	14.6	185.4	11.3	15	15.8	232.2	190	135.7	2324.48	3084.1	3245.79	47747.6	39081.9	27917.7				47747.6	23291.5	10531.8	Not Found	Not Found	Not Found	High	High	Peak Found	High	0.0008826	0.0002092	3.36	35.28
[R].AAPQQKR.[S]	1xBiotin [K6]	3	5	O14763	O14763 [67-73]	O14763 1xBiotin [K72]	Tumor necrosis factor receptor superfamily member 10B [OS=Homo sapiens]	1	1024.54	12.356	15.4	184.6	14.3	15.4	13.3	164.3	221	171.7	3255.93	3493.21	3021.58	37334.6	50233	39031.3				37334.6	29937.1	14724.4	Not Found	Not Found	Not Found	High	High	High	High	0.0009289	0.009673	1.91	18.08
[-].MSSGNAKIGHPAPNFK.[A]	1xBiotin [K7]; 1xMet-loss+Acetyl [N-Term]	1	6	Q06830	Q06830 [1-16]	Q06830 1xBiotin [K7]; 1xMet-loss+Acetyl [N-Term]	peroxiredoxin-1 [OS=Homo sapiens]	1	1792.88	12.146	15.2	184.8	11.8	13	18.8	278.9	157.6	120	4621.06	5096.85	7370.78	109524	61906.1	47122.5			1914.63	109524	36893.9	17776.8	Not Found	Not Found	Peak Found	High	High	High	High	0.0008826	3.433e-05	4.03	35.84
[K].NIKLGIHEDSQNR.[K]	1xBiotin [K3]	2	5	P07900	P07900 [444-456]	P07900 1xBiotin [K446]	Heat shock protein HSP 90-alpha [OS=Homo sapiens]	1	1749.87	12.104	15.3	184.7	18.7	13.2	9	299.7	160.2	99.1	5501.71	3903.46	2667.94	88389.8	47247.6	29237.8				88389.8	28157.9	11029.8	Not Found	Not Found	Not Found	High	High	High	High	0.0008826	0.0003507	3.15	33.99
[K].TPKTPK.[G]	1xBiotin [K3]	3	3	P06748	P06748 [234-239]	P06748 1xBiotin [K236]	Nucleophosmin [OS=Homo sapiens]	1	897.486	11.901	14.8	185.2	15.9	14.6	19.6	232.9	198.7	118.3	2368.5	2171.51	2908.43	34613.3	29532.2	17591.5				34613.3	17600.2	6636.32	Not Found	Not Found	Not Found	High	Peak Found	High	High	0.00223	0.02724	1.59	19.64
[R].VSAKNALESYAFNMK.[S]	1xBiotin [K4]; 1xOxidation [M14]	2	7	P0DMV8	P0DMV8 [536-550]	P0DMV8 1xBiotin [K539]	heat shock 70 kDa protein 1A [OS=Homo sapiens]	1	1914.91	11.635	16.1	183.9	17.7	19.6	10.2	201.4	232.8	118.3	4983.43	5536.36	2866.73	56816.9	65669.9	33354.2				56816.9	39137	12582.7	Not Found	Not Found	Not Found	High	High	High	High	0.0008826	0.0005039	2.83	49.04
[K].EKYIDQEELNK.[T]	1xBiotin [K2]	5	3	P07900; P08238	P07900 [282-292]; P08238 [274-284]	P07900 1xBiotin [K283]; P08238 1xBiotin [K275]	Heat shock protein HSP 90-alpha [OS=Homo sapiens] Heat shock protein HSP 90-beta [OS=Homo sapiens]	1	1634.77	11.603	20.9	179.1	16.3	11.8	18.8	275.9	139.8	137.3	3646.3	2644.2	4203.24	61633.5	31239.8	30679.4				61633.5	18617.8	11573.7	Not Found	Not Found	Not Found	High	Peak Found	High	High	0.0008826	0.0002403	2.56	36.38
[K].AKIQDK.[E]	1xBiotin [K2]	4	3	P62987	P62987 [28-33]	P62987 1xBiotin [K29]	Ubiquitin-60S ribosomal protein L40 [OS=Homo sapiens]	1	928.492	11.363	20	180	8.8	21.6	19.4	274.9	175.2	100.1	4297.09	10518	9468.93	134072	85419.5	48827.8		2585.56	2459.65	134072	50907	18420.1	Not Found	Peak Found	Peak Found	High	Peak Found	High	High	0.002658	0.04611	1.29	21.67
[R].AMTKDNNLLGR.[F]	1xBiotin [K4]	4	4	P0DMV8	P0DMV8 [448-458]	P0DMV8 1xBiotin [K451]	heat shock 70 kDa protein 1A [OS=Homo sapiens]	1	1458.72	11.278	16.3	183.7	14.9	12.6	8.2	344.6	141.9	77.9	4318.96	3654.34	2371.07	100097	41212	22618.5				100097	24560.9	8532.72	Not Found	Not Found	Not Found	High	High	High	High	0.0008826	6.732e-05	3.06	38.69
[K].TAIGKAGYTDK.[V]	1xBiotin [K5]	2	4	P06733-1	P06733-1 [229-239]	P06733-1 1xBiotin [K233]	alpha-enolase [OS=Homo sapiens]	1	1350.67	11.054	16.6	183.4	15.6	16	16.4	276.1	176.9	99	4119.96	4234.32	4345.19	73073.2	46806.7	26199				73073.2	27895.2	9883.48	Not Found	Not Found	Not Found	High	High	High	High	0.0008826	0.000115	2.91	31.93
[K].GVSKAVEHINK.[T]	1xBiotin [K4]	1	5	P06733-1	P06733-1 [61-71]	P06733-1 1xBiotin [K64]	alpha-enolase [OS=Homo sapiens]	1	1407.74	10.929	20.9	179.1	20	8.4	23.5	256.5	170.9	120.8	12376.4	5223.96	14552.2	159038	105948	74871.3	2669.09		3780.09	159038	63141.4	28244.9	Peak Found	Not Found	Peak Found	High	High	High	High	0.0008826	0.001332	2.61	28.37
[R].SGVSLAALKK.[A]	1xBiotin [K9]	3	4	P10412; P16403	P10412 [55-64]; P16403 [55-64]	P10412 1xBiotin [K63]; P16403 1xBiotin [K63]	Histone H1.4 [OS=Homo sapiens] Histone H1.2 [OS=Homo sapiens]	1	1199.68	10.847	9.5	190.5	43.5	8.2	9.1	267.6	182.6	89	13757.2	2594.25	2879.93	84595	57736.1	28138.9	2966.87			84595	34408.7	10615.3	Peak Found	Not Found	Not Found	High	High	High	High	0.0008826	0.001739	2.37	43.41
[K].EVSTYIKK.[I]	1xBiotin [K]	3	4	P68104	P68104 [173-180]	P68104 1xBiotin [K]	Elongation factor 1-alpha 1 [OS=Homo sapiens]	1	1193.62	10.756	17.2	182.8	21.1	11	18.9	229.5	201.2	118.3	4548.16	2372.58	4076.95	49510.2	43414.9	25519.7				49510.2	25873.8	9627.21	Not Found	Not Found	Not Found	High	High	High	High	0.00223	0.02386	1.75	32.85
[K].TTFVKR.[H]	1xBiotin [K5]	1	1	P62826	P62826 [24-29]	P62826 1xBiotin [K28]	GTP-binding nuclear protein RAN [OS=Homo sapiens]	1	977.524	10.756	17	183	11.3	15.3	26.2	236.4	164.8	145.9	2720.67	3689.1	6309.87	56894.1	39679.4	35127.7			1639.05	56894.1	23647.5	13251.8	Not Found	Not Found	Peak Found	High	Peak Found	Peak Found	High	0.003241	0.05216	1.69	30.92
[R].KASGPPVSELITK.[A]	1xBiotin [K1]	3	7	P10412; P16403	P10412 [34-46]; P16403 [34-46]	P10412 1xBiotin [K34]; P16403 1xBiotin [K34]	Histone H1.4 [OS=Homo sapiens] Histone H1.2 [OS=Homo sapiens]	1	1552.84	10.54	17.3	182.7	12.2	20.6	15.4	276.4	162.3	113.1	3223.63	5414.81	4052.86	72731.1	42717.5	29761.3				72731.1	25458.2	11227.3	Not Found	Not Found	Not Found	High	High	High	High	0.0008826	0.0001185	4	41.39
[R].SNDPKSQNHPGWLMR.[G]	1xBiotin [K5]; 1xOxidation [M14]	2	2	P06213-1	P06213-1 [567-581]	P06213-1 1xBiotin [K571]	insulin receptor [OS=Homo sapiens]	1	2008.91	10.447	17.5	182.5	17.6	15.4	19.4	154.4	209.5	183.6	4363.38	3833.04	4823.72	38325.7	52019.6	45585				38325.7	31001.9	17196.8	Not Found	Not Found	Not Found	High	High	Peak Found	High	0.002374	0.04026	2.41	34.31
[K].TIGGGDDSFNTFFSETGAGKHVPR.[A]	1xBiotin [K20]	8	6	P68363	P68363 [41-64]	P68363 1xBiotin [K60]	Tubulin alpha-1B chain [OS=Homo sapiens]	1	2723.25	10.262	17.4	182.6	12	10.8	194.5	110.7	146.4	125.5	4076.43	3667.5	66110.4	37635.3	49756	42653.4			17172.8	37635.3	29652.8	16090.8	Not Found	Not Found	High	High	High	High	High	0.0008826	0.0001195	4.21	50.53
[K].VILHLKEDQTEYLEER.[RW]	1xBiotin [K6]	5	4	P07900; P08238	P07900 [186-201]; P08238 [181-196]	P07900 1xBiotin [K191]; P08238 1xBiotin [K186]	Heat shock protein HSP 90-alpha [OS=Homo sapiens] Heat shock protein HSP 90-beta [OS=Homo sapiens]	1	2241.12	10.137	28.7	171.3	25.7	12	24.6	260.4	146.9	130.4	5752.84	2693.72	5506.1	58315.7	32903.6	29196.8				58315.7	19609.4	11014.4	Not Found	Not Found	Not Found	High	High	High	High	0.0008826	6.374e-05	3.59	44.66
[K].TLTGKTITLEVEPSDTIENVK.[A]	1xBiotin [K5]	4	4	P62987	P62987 [7-27]	P62987 1xBiotin [K11]	Ubiquitin-60S ribosomal protein L40 [OS=Homo sapiens]	1	2514.3	9.814	18.5	181.5	10.9	17.8	19.6	290.5	174.7	86.5	2682.92	4392.48	4838.37	71684	43106.6	21344.2				71684	25690	8052.01	Not Found	Not Found	Not Found	High	High	High	High	0.0008826	0.0002981	4.07	50.61
[K].EAKPNGIFKGSTAENAEYLR.[V]	1xBiotin [K9]	1	3	P00533-1	P00533-1 [1180-1199]	P00533-1 1xBiotin [K1188]	epidermal growth factor receptor [OS=Homo sapiens]	1	2421.19	9.764	18.6	181.4	30.2	11.4	17.5	170.7	150	220.2	5484.5	2069.35	3170.45	30957.6	27201.5	39940.7				30957.6	16211.2	15067.5	Not Found	Not Found	Not Found	High	High	High	High	0.0008826	6.4e-05	3.72	41.22
[K].VLKQVHPDTGISSK.[A]	1xBiotin [K3]	16	14	Q16778; P58876; Q93079	Q16778 [45-58]; P58876 [45-58]; Q93079 [45-58]	Q16778 1xBiotin [K47]; P58876 1xBiotin [K47]; Q93079 1xBiotin [K47]	Histone H2B type 2-E [OS=Homo sapiens] Histone H2B type 1-D [OS=Homo sapiens] Histone H2B type 1-H [OS=Homo sapiens]	1	1734.92	9.678	18.7	181.3	18.3	17.8	14.2	271.2	172.1	106.4	60617.3	58896.7	46965.2	898237	570015	352210	13072.7	14478.2	12199.7	898237	339709	132870	Peak Found	High	High	High	High	High	High	0.0008826	1.281e-05	3.41	31.73
[K].KLNVTEQEK.[I]	1xBiotin [K1]	1	4	P06733-1	P06733-1 [81-89]	P06733-1 1xBiotin [K81]	alpha-enolase [OS=Homo sapiens]	1	1314.67	9.418	14.8	185.2	50.2	9.4	13.2	273.8	164.8	88.7	16386.9	3074.66	4298.89	89421	53830.5	28956.4	3534			89421	32081.1	10923.7	Peak Found	Not Found	Not Found	High	High	High	High	0.0008826	0.0002731	2.94	29.51
[R].LVNHFVEEFKR.[K]	1xBiotin [K10]	2	9	P0DMV8	P0DMV8 [237-247]	P0DMV8 1xBiotin [K246]	heat shock 70 kDa protein 1A [OS=Homo sapiens]	1	1643.84	9.347	28.1	171.9	28.7	24.6	6.8	268.6	150.7	120.5	48135.9	41230.4	11377.9	449922	252501	201878	10381	10135.4	2955.53	449922	150482	76157.4	Peak Found	Peak Found	Peak Found	High	High	High	High	0.0008826	1.844e-05	3.27	43.89
[K].GTLVQTKGTGASGSFK.[L]	1xBiotin [K7]	5	4	P10412; P16403	P10412 [91-106]; P16403 [91-106]	P10412 1xBiotin [K97]; P16403 1xBiotin [K97]	Histone H1.4 [OS=Homo sapiens] Histone H1.2 [OS=Homo sapiens]	1	1764.89	9.285	19.4	180.6	13.5	24.2	16.1	272.7	149.9	123.5	4435.97	7949.23	5299.4	89506.9	49204.8	40538.6		1954.11		89506.9	29324.4	15293	Not Found	Peak Found	Not Found	High	High	High	High	0.0008826	4.19e-05	3.95	36.82
[R].AMTKDNNLLGR.[F]	1xBiotin [K4]; 1xOxidation [M2]	4	8	P0DMV8	P0DMV8 [448-458]	P0DMV8 1xBiotin [K451]	heat shock 70 kDa protein 1A [OS=Homo sapiens]	1	1474.71	9.268	19.5	180.5	22.9	25.8	6.9	212	217.5	114.8	19466.6	21994.9	5886.11	180417	185090	97694.9	4198.16	5406.85		180417	110307	36855	Peak Found	High	Not Found	High	High	High	High	0.0008826	0.0009523	3.56	35.13
[R].IAKAVNEK.[S]	1xBiotin [K3]	2	3	P06733-1	P06733-1 [328-335]	P06733-1 1xBiotin [K330]	alpha-enolase [OS=Homo sapiens]	1	1098.6	9.073	21.4	178.6	24.2	22.9	12.7	219.2	190.3	130.8	4621.72	4373.42	2427.54	41930.6	36411.9	25025.1				41930.6	21700.2	9440.6	Not Found	Not Found	Not Found	High	High	Peak Found	High	0.0008826	0.002358	2.19	26.18
[R].HQGVMVGMGQKDSYVGDEAQSK.[R]	1xBiotin [K11]; 2xOxidation [M5; M8]	6	4	P60709	P60709 [40-61]	P60709 1xBiotin [K50]	Actin, cytoplasmic 1 [OS=Homo sapiens]	1	2609.14	8.963	15.7	184.3	15.5	33.9	15.9	209.7	186.1	139	5737.98	12525.7	5871.16	77597	68850.2	51431.2		3079.11		77597	41032.3	19402.2	Not Found	Peak Found	Not Found	High	High	High	High	0.0008826	0.0004442	4.1	31.79
[K].GTGASGSFKLNK.[K]	1xBiotin [K9]	5	3	P10412; P16403	P10412 [98-109]; P16403 [98-109]	P10412 1xBiotin [K106]; P16403 1xBiotin [K106]	Histone H1.4 [OS=Homo sapiens] Histone H1.2 [OS=Homo sapiens]	1	1392.69	8.764	18.9	181.1	39.3	15.1	15.3	146	252.4	132	5612.06	2151.82	2183.18	20864.9	36063.4	18857.7				20864.9	21492.5	7113.98	Not Found	Not Found	Not Found	High	High	High	High	0.0008826	0.0004033	2.57	34
[R].SAPGGGSKVPQK.[K]	1xBiotin [K8]	3	2	P06748	P06748 [143-154]	P06748 1xBiotin [K150]	Nucleophosmin [OS=Homo sapiens]	1	1338.68	8.653	25.5	174.5	28.6	23.8	14.1	248	162.9	122.4	5321.85	4431.48	2628.61	46087.4	30272.1	22746				46087.4	18041.1	8580.85	Not Found	Not Found	Not Found	High	High	Peak Found	High	0.0009289	0.005514	2.31	24.91
[R].LAKYNQLLR.[I]	1xBiotin [K3]	2	2	P06733-1	P06733-1 [404-412]	P06733-1 1xBiotin [K406]	alpha-enolase [OS=Homo sapiens]	1	1344.75	8.65	20.7	179.3	31.1	11.9	19.3	243.5	166.6	127.6	5890.34	2262.96	3648.45	46135.1	31559.8	24168.4				46135.1	18808.6	9117.44	Not Found	Not Found	Not Found	Peak Found	High	High	High	0.0008826	0.0003399	2.5	42.99
[R].GKAVGPASILK.[E]	1xBiotin [K2]	2	2	O95218-1	O95218-1 [136-146]	O95218-1 1xBiotin [K137]	Zinc finger Ran-binding domain-containing protein 2 [OS=Homo sapiens]	1	1266.72	8.55	20.9	179.1	20.1	21.7	21.3	168.4	183.3	185.2	2679.14	2882.36	2840.55	22415.3	24400	24644.9				22415.3	14541.6	9297.17	Not Found	Not Found	Not Found	High	Peak Found	Peak Found	High	0.0009289	0.01473	3.01	41.59
[R].KGVITVK.[D]	1xBiotin [K1]	1	1	P10809	P10809 [196-202]	P10809 1xBiotin [K196]	60 kDa heat shock protein, mitochondrial [OS=Homo sapiens]	1	970.575	8.546	21	179	11.6	31.2	24.3	223.8	208.1	101	2172.91	5823.1	4550.03	41825.1	38882.4	18872.1				41825.1	23172.5	7119.41	Not Found	Not Found	Not Found	High	Peak Found	Peak Found	High	0.002374	0.04211	1.83	32.96
[K].KDISQNKR.[A]	1xBiotin [K1]	3	3	P0DMV8	P0DMV8 [251-258]	P0DMV8 1xBiotin [K251]	heat shock 70 kDa protein 1A [OS=Homo sapiens]	2	1214.63	8.345	21.4	178.6	9.3	34.1	22.7	189.5	219.4	125	5440.17	19881.8	13254.7	110614	128103	72994.5		4887.41	3443.03	110614	76344.8	27536.9	Not Found	Peak Found	Peak Found	High	High	Peak Found	High	0.0008826	0.001573	2.37	19.27
[-].MPEPAKSAPAPK.[K]	1xBiotin [K6]; 1xMet-loss [N-Term]	5	4	Q16778	Q16778 [1-12]	Q16778 1xBiotin [K6]; 1xMet-loss [N-Term]	Histone H2B type 2-E [OS=Homo sapiens]	1	1318.68	8.268	21.6	178.4	17.1	23.7	23.3	223.4	192.5	120	2254.17	3116.46	3067.58	29440.5	25363.7	15811.5				29440.5	15115.9	5964.81	Not Found	Not Found	Not Found	High	High	Peak Found	High	0.0008826	0.001676	2.38	25.81
[K].TIAPALVSKK.[L]	1xBiotin [K]	1	3	P06733-1	P06733-1 [72-81]	P06733-1 1xBiotin [K]	alpha-enolase [OS=Homo sapiens]	1	1253.73	8.113	21.5	178.5	19.5	27.5	23.1	223.2	192.5	114.1	4971.77	7013.07	5896.42	56899.5	49068.3	29075.6		1723.98		56899.5	29243	10968.7	Not Found	Peak Found	Not Found	High	High	Peak Found	High	0.003389	0.05338	1.75	38.77
[K].GLGKGGAK.[CR]	1xBiotin [K4]	2	1	P62805	P62805 [10-17]	P62805 1xBiotin [K13]	histone H4 [OS=Homo sapiens]	1	913.492	7.883	22.5	177.5	16.9	20.8	15.7	339.4	133.6	73.4	2487.78	3057.11	2311.66	49831.4	19611.2	10782.2				49831.4	11687.6	4067.52	Not Found	Not Found	Not Found	High	Peak Found	Peak Found	High	0.0009289	0.01489	2.02	24.65
[K].TTWVTKHAAENPGK.[Y]	1xBiotin [K6]	2	1	Q00839	Q00839 [511-524]	Q00839 1xBiotin [K516]	Heterogeneous nuclear ribonucleoprotein U [OS=Homo sapiens]	1	1765.87	7.809	22.7	177.3	17.2	22.7	16.6	337.1	134.5	71.8	2100.62	2766.1	2025.9	41102.7	16402.9	8755.2				41102.7	9775.58	3302.86	Not Found	Not Found	Not Found	High	Peak Found	Peak Found	High	0.0008826	0.002105	2.93	32.84
[K].LDKAQIHDLVLVGGSTR.[I]	1xBiotin [K3]	2	8	P0DMV8	P0DMV8 [326-342]	P0DMV8 1xBiotin [K328]	heat shock 70 kDa protein 1A [OS=Homo sapiens]	1	2048.1	7.666	23.1	176.9	10.7	25.2	36.2	193.3	214.7	119.9	18314.1	42964.1	61641.3	329363	365752	204331	3949.61	10561.6	16011.9	329363	217975	77083	Peak Found	Peak Found	Peak Found	High	High	High	High	0.0008826	1.532e-07	4.64	49.21
[K].TPKGPSSVEDIK.[A]	1xBiotin [K3]	3	3	P06748	P06748 [237-248]	P06748 1xBiotin [K239]	Nucleophosmin [OS=Homo sapiens]	1	1483.75	7.655	26.5	173.5	25.7	22.8	15.6	267.9	148.9	119.2	5668.59	5026	3437.29	59113.6	32854.7	26310.8				59113.6	19580.2	9925.64	Not Found	Not Found	Not Found	High	High	High	High	0.0008826	3.78e-05	3.39	34.33
[R].YQKSTELLIR.[K]	1xBiotin [K3]	5	3	P84243	P84243 [55-64]	P84243 1xBiotin [K57]	histone H3.3 [OS=Homo sapiens]	1	1476.79	7.598	23.3	176.7	17.2	11.3	17.9	340.1	130.6	83	5113.83	3376.81	5319.96	101208	38856.2	24689.2				101208	23157	9313.88	Not Found	Not Found	Not Found	High	High	High	High	0.0008826	0.002409	2.35	43.65
[-].MVKQIESK.[T]	1xBiotin [K3]; 1xMet-loss [N-Term]	2	1	P10599-1	P10599-1 [1-8]	P10599-1 1xBiotin [K3]; 1xMet-loss [N-Term]	thioredoxin [OS=Homo sapiens]	1	1057.57	7.486	23.6	176.4	22.5	17.6	27.1	264.2	168.8	99.9	3689.9	2872.5	4428.05	43232.2	27621.5	16341.5				43232.2	16461.4	6164.75	Not Found	Not Found	Not Found	Peak Found	High	Peak Found	High	0.003389	0.05868	1.49	25.53
[R].TGKGER.[N]	1xBiotin [K3]	2	3	P0DMV8	P0DMV8 [188-193]	P0DMV8 1xBiotin [K190]	heat shock 70 kDa protein 1A [OS=Homo sapiens]	1	873.425	7.42	25	175	14.8	28.3	26.4	236.2	184.5	109.8	4694.83	8982.52	8374.21	74950	58537.7	34833.7		2208.11	2175.28	74950	34886.4	13140.9	Not Found	Peak Found	Peak Found	High	High	High	High	0.00223	0.02778	1.92	16.89
[K].KDISQNK.[R]	1xBiotin [K1]	3	8	P0DMV8	P0DMV8 [251-257]	P0DMV8 1xBiotin [K251]	heat shock 70 kDa protein 1A [OS=Homo sapiens]	1	1058.53	7.192	19.4	180.6	32.6	20.2	20	234.3	187.9	105	63111.7	39197.4	38675.2	453928	364084	203414	13610.7	9635.62	10046.3	453928	216982	76736.9	Peak Found	High	High	High	High	High	High	0.0009289	0.003347	2.66	22.2
[R].LAKLSDGVAVLK.[V]	1xBiotin [K3]	1	5	P10809	P10809 [394-405]	P10809 1xBiotin [K396]	60 kDa heat shock protein, mitochondrial [OS=Homo sapiens]	1	1439.83	7.142	24.6	175.4	24.4	19.6	22.3	274.4	159.3	100	3210.76	2582.62	2933.71	36102.3	20953.7	13154.6				36102.3	12487.7	4962.52	Not Found	Not Found	Not Found	High	High	High	High	0.0009289	0.01009	2.26	45.64
[R].NVLVKTPQHVK.[I]	1xBiotin [K5]	1	2	P00533-1	P00533-1 [842-852]	P00533-1 1xBiotin [K846]	epidermal growth factor receptor [OS=Homo sapiens]	1	1488.84	7.084	28	172	24.3	36.3	14.4	257	149.1	119	4078.46	6098.91	2417.24	43206	25066.2	19997.5		1499.25		43206	14938.6	7543.98	Not Found	Peak Found	Not Found	High	Peak Found	Peak Found	High	0.00223	0.02921	1.88	31.67
[R].HQGVMVGMGQKDSYVGDEAQSK.[R]	1xBiotin [K11]; 1xOxidation [M]	6	7	P60709	P60709 [40-61]	P60709 1xBiotin [K50]	Actin, cytoplasmic 1 [OS=Homo sapiens]	1	2593.15	6.987	25	175	24.1	22.3	24.2	269.8	168.3	91.3	5537.82	5137.56	5558.74	62024.1	38695.1	20991.3				62024.1	23060.9	7918.88	Not Found	Not Found	Not Found	High	High	High	High	0.0008826	5.142e-05	4.17	35.86
[R].AKHHAISAK.[L]	1xBiotin [K2]	3	2	P27824	P27824 [126-134]	P27824 1xBiotin [K127]	Calnexin [OS=Homo sapiens]	1	1188.63	6.965	25.1	174.9	17.4	25.3	34.7	250.6	175.9	96.1	2559.16	3711.91	5100.1	36834.6	25853.1	14127				36834.6	15407.5	5329.33	Not Found	Not Found	Not Found	High	High	Peak Found	High	0.0008826	0.0006603	2.98	14.62
[K].DSKPSSTPR.[S]	1xBiotin [K3]	2	1	P06748	P06748 [213-221]	P06748 1xBiotin [K215]	Nucleophosmin [OS=Homo sapiens]	0	1200.57	6.958	25.1	174.9	21.7	21.9	28	285.4	152	91.1	2209.2	2222.42	2842.64	29024.1	15463.2	9260.86				29024.1	9215.53	3493.62	Not Found	Not Found	Not Found	High	Peak Found	Peak Found	High	0.00223	0.02968	1.52	22.74
[R].SKGQESFK.[K]	1xBiotin [K2]	2	2	P06748	P06748 [222-229]	P06748 1xBiotin [K223]	Nucleophosmin [OS=Homo sapiens]	1	1136.54	6.937	25.2	174.8	10.4	49.6	18.7	291	129.5	100.9	2605.84	12406.5	4672.78	72855.8	32416.1	25263.6		3049.8		72855.8	19318.9	9530.58	Not Found	Peak Found	Not Found	High	High	Peak Found	High	0.0008826	0.002406	2.19	26.83
[K].ADKDYHFK.[V]	1xBiotin [K3]	3	2	P06748	P06748 [25-32]	P06748 1xBiotin [K27]	Nucleophosmin [OS=Homo sapiens]	1	1249.57	6.931	25.2	174.8	38.4	8.1	24.1	262	166.7	100.7	11171.2	2356.93	6994.34	76186.1	48477.9	29280.9	2409.19		1816.85	76186.1	28891.2	11046.1	Peak Found	Not Found	Peak Found	High	Peak Found	Peak Found	High	0.0008826	0.002633	2.4	30.77
[R].KDLYANTVLSGGTTMYPGIADR.[M]	1xBiotin [K1]; 1xOxidation [M15]	2	5	P60709	P60709 [291-312]	P60709 1xBiotin [K291]	Actin, cytoplasmic 1 [OS=Homo sapiens]	1	2585.24	6.88	25.4	174.6	26.6	26.5	25.3	197	182.2	142.4	5022.11	4999.75	4782.21	37174.4	34398.4	26872.7				37174.4	20500.2	10137.6	Not Found	Not Found	Not Found	High	High	High	High	0.0008826	9.052e-05	3.64	48.62
[K].KELTQIK.[QT]	1xBiotin [K1]	7	2	P07910-1	P07910-1 [198-204]	P07910-1 1xBiotin [K198]	Heterogeneous nuclear ribonucleoproteins C1/C2 [OS=Homo sapiens]	1	1085.6	6.867	33.7	166.3	32.5	16.9	32.4	223.4	160.1	134.7	4749.61	2463.78	4736.85	32615.7	23370.3	19661.1				32615.7	13927.9	7417.05	Not Found	Not Found	Not Found	High	High	Peak Found	High	0.002979	0.0478	1.86	33.91
[R].KTVGVEPAADGK.[G]	1xBiotin [K1]	5	2	P46779	P46779 [47-58]	P46779 1xBiotin [K47]	60S ribosomal protein L28 [OS=Homo sapiens]	1	1397.71	6.773	25.7	174.3	26.5	16.7	26.2	251.3	177.5	101.9	3249.16	2047.28	3215.3	30837.4	21776.1	12500.3				30837.4	12977.8	4715.69	Not Found	Not Found	Not Found	High	High	Peak Found	High	0.0008826	1.406e-05	3.1	30.52
[K].VPKTAENFR.[A]	1xBiotin [K3]	1	2	P62937	P62937 [29-37]	P62937 1xBiotin [K31]	peptidyl-prolyl cis-trans isomerase A [OS=Homo sapiens]	1	1287.65	6.651	26.1	173.9	12.9	24.5	49.8	239.9	163.2	109.7	2344.83	4458.98	9042.97	43586.7	29656.3	19922.2			2349	43586.7	17674.1	7515.56	Not Found	Not Found	Peak Found	High	Peak Found	Peak Found	High	0.0008826	0.001275	2.22	32.6
[K].KPAAAAGAKK.[A]	1xBiotin [K9]	1	4	P10412	P10412 [160-169]	P10412 1xBiotin [K168]	Histone H1.4 [OS=Homo sapiens]	1	1138.64	6.591	26.3	173.7	17.2	29.1	27.9	280.5	184.1	61.2	2100.59	3553.57	3416.76	34300	22521.3	7488.39				34300	13421.9	2824.96	Not Found	Not Found	Not Found	High	High	Peak Found	High	0.0008826	0.00147	2.05	15.63
[R].LSKEEIER.[M]	1xBiotin [K3]	3	5	P0DMV8	P0DMV8 [510-517]	P0DMV8 1xBiotin [K512]	heat shock 70 kDa protein 1A [OS=Homo sapiens]	1	1229.62	6.588	26.4	173.6	27.6	24.6	24.4	252	162.4	109	26980.6	24079.4	23814.1	246273	158644	106492	5818.63	5919.28	6185.95	246273	94546.6	40173.5	Peak Found	Peak Found	Peak Found	High	High	High	High	0.0008826	0.0008532	2.8	34.89
[R].KGNYAER.[VI]	1xBiotin [K1]	10	3	Q16777	Q16777 [37-43]	Q16777 1xBiotin [K37]	Histone H2A type 2-C [OS=Homo sapiens]	1	1063.5	6.557	26.5	173.5	21.5	23.2	19.3	324.4	140.7	70.9	10889.7	11782.5	9788.97	164677	71404.7	35994.9	2348.47	2896.42	2542.78	164677	42554.7	13578.9	Peak Found	Peak Found	Peak Found	High	High	Peak Found	High	0.0009289	0.007789	2.1	22.66
[K].ANKITITNDK.[G]	1xBiotin [K3]	3	8	P0DMV8	P0DMV8 [498-507]	P0DMV8 1xBiotin [K500]	heat shock 70 kDa protein 1A [OS=Homo sapiens]	1	1343.7	6.487	26.7	173.3	25.3	23.1	22.6	266.9	150	112.1	34916.9	31918.9	31253.8	368507	207063	154773	7530.18	7846.39	8118.48	368507	123403	58387.3	Peak Found	High	High	High	High	High	High	0.0008826	0.0001334	3.12	33.73
[R].KVGALESK.[L]	1xBiotin [K1]	5	1	Q9NXR1-1	Q9NXR1-1 [263-270]	Q9NXR1-1 1xBiotin [K263]	Nuclear distribution protein nudE homolog 1 [OS=Homo sapiens]	1	1057.57	6.421	27	173	26.1	17.5	27	262.5	167.7	99.2	4301.92	2885.67	4444.07	43232.2	27621.5	16341.5				43232.2	16461.4	6164.75	Not Found	Not Found	Not Found	High	Peak Found	Peak Found	High	0.0009289	0.01468	1.47	25.53
[R].LIFAGKQLEDGR.[T]	1xBiotin [K6]	4	3	P62987	P62987 [43-54]	P62987 1xBiotin [K48]	Ubiquitin-60S ribosomal protein L40 [OS=Homo sapiens]	1	1572.82	6.174	28.1	171.9	39.4	15.7	20.4	302.7	124.7	97.1	19898.8	7948.63	10304.5	152973	63031.6	49071.9	4291.37	1953.96	2676.7	152973	37564.7	18512.2	Peak Found	Peak Found	Peak Found	Peak Found	High	High	High	0.0008826	0.000302	2.55	46.43
[R].TLLAKNLPYK.[V]	1xBiotin [K5]	1	3	P19338	P19338 [394-403]	P19338 1xBiotin [K398]	Nucleolin [OS=Homo sapiens]	1	1386.78	6.16	32.3	167.7	27.9	41.9	16.2	269.8	144.7	99.5	3750.69	5637.59	2172.37	36275.6	19455.4	13381.5				36275.6	11594.7	5048.11	Not Found	Not Found	Not Found	High	High	Peak Found	High	0.0009289	0.01152	1.87	44.7
[R].EESGKPGAHVTVK.[K]	1xBiotin [K5]	2	1	P22626	P22626 [100-112]	P22626 1xBiotin [K104]	heterogeneous nuclear ribonucleoproteins A2/B1 [OS=Homo sapiens]	0	1564.78	6.013	27.8	172.2	32.2	45.5	23.7	273.6	199.9	25.1	3262.49	4603.61	2393.84	27681.6	20229.1	2535.85				27681.6	12055.8		Not Found	Not Found	Not Found	High	Peak Found	Not Found	High	0.0008826	0.001223	1.95	26.79
[K].KSADTLWDIQK.[D]	1xBiotin [K1]	1	2	P07195	P07195 [319-329]	P07195 1xBiotin [K319]	L-lactate dehydrogenase B chain [OS=Homo sapiens]	1	1530.76	5.999	28.6	171.4	21.6	16.1	29.2	315.6	129.6	88	2798.76	2080.58	3782.66	40881.4	16789	11401				40881.4	10005.7	4300.97	Not Found	Not Found	Not Found	High	High	Peak Found	High	0.0008826	6.51e-06	3.55	45.19
[R].LDHKFDLMYAK.[R]	1xBiotin [K4]; 1xOxidation [M8]	12	1	P68363	P68363 [391-401]	P68363 1xBiotin [K394]	Tubulin alpha-1B chain [OS=Homo sapiens]	1	1622.77	5.994	18.8	181.2	24.3	42	17.5	251.9	233.8	30.5	3322.44	5749.63	2392.94	34463.3	31985.3	4166.66				34463.3	19062.1		Not Found	Not Found	Not Found	High	Peak Found	Not Found	High	0.0008826	0.0003431	3.75	40.84
[K].LPNLGKHEK.[F]	1xBiotin [K6]	1	2	P12277	P12277 [299-307]	P12277 1xBiotin [K304]	Creatine kinase B-type [OS=Homo sapiens]	1	1261.67	5.979	28.7	171.3	31.8	18.4	29.2	285.7	174.6	60.4	4513.61	2617.94	4147.39	40580	24797.9	8575.63				40580	14778.7	3235.12	Not Found	Not Found	Not Found	High	Peak Found	Peak Found	High	0.002374	0.04206	2.63	31.33
[K].VLSKEFHLNESGDPSSK.[S]	1xBiotin [K4]	4	2	Q01105	Q01105 [151-167]	Q01105 1xBiotin [K154]	Protein SET [OS=Homo sapiens]	1	2100.01	5.905	29	171	20.5	31.8	24.4	283.3	144.3	95.6	2158.55	3353.1	2576.52	29869	15213.6	10081.9				29869	9066.78	3803.34	Not Found	Not Found	Not Found	High	High	Peak Found	High	0.0008826	0.00126	2.96	39.53
[K].VKVGVNGFGR.[I]	1xBiotin [K2]	1	2	P04406-1	P04406-1 [4-13]	P04406-1 1xBiotin [K5]	glyceraldehyde-3-phosphate dehydrogenase [OS=Homo sapiens]	1	1258.67	5.844	21.3	178.7	20.6	22.3	39.2	186.7	211	120.3	2447.83	2653.08	4659.33	22205.9	25101.9	14305.9				22205.9	14959.8	5396.84	Not Found	Not Found	Not Found	High	High	Peak Found	High	0.003389	0.05853	1.91	37.92
[R].AGVHIKLPNLGK.[H]	1xBiotin [K6]	1	2	P12277	P12277 [293-304]	P12277 1xBiotin [K298]	Creatine kinase B-type [OS=Homo sapiens]	1	1472.84	5.841	29.2	170.8	15.2	38.1	27.6	214.4	161.5	143.2	2051.89	5121.67	3720.62	28851.4	21733	19272.4				28851.4	12952.1	7270.43	Not Found	Not Found	Not Found	High	Peak Found	Peak Found	High	0.0008826	0.0002443	3.06	43.12
[K].GGKGLGK.[G]	1xBiotin [K3]	1	1	P62805	P62805 [7-13]	P62805 1xBiotin [K9]	histone H4 [OS=Homo sapiens]	1	842.455	5.835	32.9	167.1	29.7	13.9	40.8	283.4	151.1	81	5222.78	2440.25	7172.58	49800	26557.4	14238.5			1863.15	49800	15827.3	5371.43	Not Found	Not Found	Peak Found	High	Peak Found	Peak Found	High	0.002374	0.04172	2.07	24.35
[K].LKDDEVAQLK.[K]	1xBiotin [K2]	1	3	P07195	P07195 [309-318]	P07195 1xBiotin [K310]	L-lactate dehydrogenase B chain [OS=Homo sapiens]	1	1384.71	5.736	29.7	170.3	24.5	36.8	29.5	228.1	169.4	111.8	3101.68	4668	3744.94	28923.4	21480.1	14176.8				28923.4	12801.4	5348.13	Not Found	Not Found	Not Found	High	High	Peak Found	High	0.0009289	0.006823	2.3	36.53
[K].IGIEIIKR.[T]	1xBiotin [K7]	1	3	P10809	P10809 [463-470]	P10809 1xBiotin [K469]	60 kDa heat shock protein, mitochondrial [OS=Homo sapiens]	1	1167.69	5.66	30	170	22.8	16.3	33.8	308	129.2	89.9	3143.24	2241.64	4655.91	42431.2	17791.3	12381.9				42431.2	10603	4671.02	Not Found	Not Found	Not Found	High	High	High	High	0.0009289	0.00311	2.26	45.85
[RK].VVEPKR.[AIQ]	1xBiotin [K5]	11	3	P51991-1; P22626; P09651-1	P51991-1 [104-109]; P22626 [90-95]; P09651-1 [83-88]	P51991-1 1xBiotin [K108]; P22626 1xBiotin [K94]; P09651-1 1xBiotin [K87]	Heterogeneous nuclear ribonucleoprotein A3 [OS=Homo sapiens] heterogeneous nuclear ribonucleoproteins A2/B1 [OS=Homo sapiens] Heterogeneous nuclear ribonucleoprotein A1 [OS=Homo sapiens]	1	953.524	5.658	32.6	167.4	40.7	30.9	4.4	230	158.8	135.1	24523	18668.2	2681.51	138762	95797.7	81489	5288.62	4589.08		138762	57092.1	30741.4	Peak Found	Peak Found	Not Found	High	High	Peak Found	High	0.002374	0.03541	1.61	23.85
[R].LAHYNKR.[S]	1xBiotin [K6]	16	9	Q16778; P58876; Q93079	Q16778 [81-87]; P58876 [81-87]; Q93079 [81-87]	Q16778 1xBiotin [K86]; P58876 1xBiotin [K86]; Q93079 1xBiotin [K86]	Histone H2B type 2-E [OS=Homo sapiens] Histone H2B type 1-D [OS=Homo sapiens] Histone H2B type 1-H [OS=Homo sapiens]	1	1127.58	5.634	30.1	169.9	5.3	30.4	43.9	224.2	171.5	124.5	4293.7	24448.1	35276.3	180072	137731	100000		6009.91	9163.37	180072	82082.9	37724.6	Not Found	Peak Found	High	High	High	High	High	0.0009289	0.01125	1.99	22.94
[K].VQVSYKGETK.[A]	1xBiotin [K6]	1	4	P0DMV8	P0DMV8 [103-112]	P0DMV8 1xBiotin [K108]	heat shock 70 kDa protein 1A [OS=Homo sapiens]	1	1364.69	5.612	27.5	172.5	40.6	26.3	29.1	227.8	182.6	93.6	52291.5	33929	37444.2	293453	235228	120570	11277.2	8340.54	9726.5	293453	140188	45484.6	Peak Found	Peak Found	Peak Found	High	High	High	High	0.0009289	0.007774	2.61	31.43
[R].YMGKGVSK.[A]	1xBiotin [K4]; 1xOxidation [M2]	1	5	P06733-1	P06733-1 [57-64]	P06733-1 1xBiotin [K60]	alpha-enolase [OS=Homo sapiens]	1	1111.53	5.591	30.3	169.7	29.7	19.6	35.3	166.2	189.2	160	4683.03	3094.51	5553.71	26181	29797.7	25207.5				26181	17758.4	9509.42	Not Found	Not Found	Not Found	High	High	High	High	0.00223	0.03031	1.99	24.46
[K].AVTKAQK.[K]	1xBiotin [K4]	13	5	Q16778; P58876; Q93079	Q16778 [18-24]; P58876 [18-24]; Q93079 [18-24]	Q16778 1xBiotin [K21]; P58876 1xBiotin [K21]; Q93079 1xBiotin [K21]	Histone H2B type 2-E [OS=Homo sapiens] Histone H2B type 1-D [OS=Homo sapiens] Histone H2B type 1-H [OS=Homo sapiens]	1	971.534	5.579	30.5	169.5	7.7	35.2	38.3	195.5	213.8	109.4	3156.45	14402.6	15662.9	79925	87386.6	44722.7		3540.49	4068.58	79925	52079.4	16871.5	Not Found	Peak Found	Peak Found	High	High	High	High	0.0009289	0.01392	1.96	19.88
[K].ASGPPVSELITKAVAASK.[E]	1xBiotin [K12]	3	8	P10412; P16403	P10412 [35-52]; P16403 [35-52]	P10412 1xBiotin [K46]; P16403 1xBiotin [K46]	Histone H1.4 [OS=Homo sapiens] Histone H1.2 [OS=Homo sapiens]	1	1952.05	5.532	30.6	169.4	30.9	32	27.6	234.4	170.8	104.3	5651.62	5862.45	5058.49	42908.1	31266.6	19091.6				42908.1	18633.8	7202.21	Not Found	Not Found	Not Found	High	High	High	High	0.0008826	2.644e-07	3.93	58.71
[R].DAKLDK.[AGS]	1xBiotin [K3]	7	1	P11142-1; P0DMV8	P11142-1 [323-328]; P0DMV8 [323-328]	P11142-1 1xBiotin [K325]; P0DMV8 1xBiotin [K325]	Heat shock cognate 71 kDa protein [OS=Homo sapiens] heat shock 70 kDa protein 1A [OS=Homo sapiens]	1	915.46	5.498	19.6	180.4	37.5	22.2	21.2	206.4	204.4	108.3	28885.2	17053.7	16293.7	158807	157250	83350	6229.38	4192.21	4232.45	158807	93715.3	31443.4	Peak Found	Peak Found	Peak Found	Peak Found	High	Peak Found	High	0.00223	0.0233	2.14	25.14
[K].LEDGPKFLK.[S]	1xBiotin [K6]	3	1	P68104	P68104 [387-395]	P68104 1xBiotin [K392]	Elongation factor 1-alpha 1 [OS=Homo sapiens]	1	1272.67	5.449	35.8	164.2	28.8	20.9	25.6	293.4	117.3	113.9	3444.83	2499.95	3061.92	35083.8	14024	13622.8				35083.8	8357.83	5139.16	Not Found	Not Found	Not Found	High	Peak Found	Peak Found	High	0.0009289	0.00386	2.7	41.81
[K].EFEGKTLVSVTK.[E]	1xBiotin [K5]	3	3	P07900	P07900 [535-546]	P07900 1xBiotin [K539]	Heat shock protein HSP 90-alpha [OS=Homo sapiens]	1	1563.81	5.396	31.3	168.7	32.1	19.1	40.5	240	173	95.4	3377.36	2007.43	4268.22	25282.5	18222.9	10049.2				25282.5	10860.2	3791.02	Not Found	Not Found	Not Found	High	High	High	High	0.0008826	0.00179	2.82	43.81
[R].LLLPGELAKHAVSEGTK.[A]	1xBiotin [K]	16	10	Q16778; P58876; Q93079	Q16778 [101-117]; P58876 [101-117]; Q93079 [101-117]	Q16778 1xBiotin [K]; P58876 1xBiotin [K]; Q93079 1xBiotin [K]	Histone H2B type 2-E [OS=Homo sapiens] Histone H2B type 1-D [OS=Homo sapiens] Histone H2B type 1-H [OS=Homo sapiens]	1	1989.08	5.386	31.3	168.7	28.2	23.5	27.8	245.2	149.6	125.6	56428.9	47075.2	55565.9	490454	299252	251173	12169.5	11572.2	14433.8	490454	178344	94753.9	Peak Found	Peak Found	High	High	High	High	High	0.0008826	3.719e-05	2.69	48.59
[K].KYHNVGLSK.[C]	1xBiotin [K1]	4	1	Q14103	Q14103 [243-251]	Q14103 1xBiotin [K243]	heterogeneous nuclear ribonucleoprotein D0 [OS=Homo sapiens]	1	1271.66	5.378	26.7	173.3	32.4	32.5	45.5	244.9	210.6	34	3082.97	3091.81	4331.86	23296.3	20030.4	3230.92				23296.3	11937.4		Not Found	Not Found	Not Found	High	Peak Found	Not Found	High	0.0008826	0.00198	3.03	26.15
[K].ADLINNLGTIAKSGTK.[A]	1xBiotin [K]	4	4	P07900; P08238	P07900 [101-116]; P08238 [96-111]	P07900 1xBiotin [K]; P08238 1xBiotin [K]	Heat shock protein HSP 90-alpha [OS=Homo sapiens] Heat shock protein HSP 90-beta [OS=Homo sapiens]	1	1841.98	5.356	31.5	168.5	30	32.7	25.9	249.6	160.5	101.3	4759.69	5193.45	4114.38	39659	25493.3	16097.5				39659	15193.1	6072.71	Not Found	Not Found	Not Found	High	High	Peak Found	High	0.0008826	0.000289	2.81	49.53
[K].AQIEKR.[I]	1xBiotin [K5]	1	1	P10809	P10809 [365-370]	P10809 1xBiotin [K369]	60 kDa heat shock protein, mitochondrial [OS=Homo sapiens]	1	970.514	5.32	26.8	173.2	39.8	24.6	28.3	211.5	182.9	112.9	4447.85	2756.17	3166.2	23664.1	20467.3	12635.5				23664.1	12197.8	4766.7	Not Found	Not Found	Not Found	High	Peak Found	Peak Found	High	0.002374	0.03303	1.64	24.64
[K].KHLEINPDHSIIETLR.[Q]	1xBiotin [K1]	2	3	P07900	P07900 [632-647]	P07900 1xBiotin [K632]	Heat shock protein HSP 90-alpha [OS=Homo sapiens]	1	2141.12	5.317	31.7	168.3	25.2	36.9	32.3	228.6	171.9	105.1	3634.25	5332.04	4667.84	33003.6	24820.7	15179.3				33003.6	14792.3	5726.33	Not Found	Not Found	Not Found	High	High	High	High	0.0008826	8.781e-06	3.66	44.33
[R].DTPAKNAQK.[S]	1xBiotin [K5]	2	2	P06748	P06748 [198-206]	P06748 1xBiotin [K202]	Nucleophosmin [OS=Homo sapiens]	1	1198.59	5.294	29.6	170.4	28.4	66.5	24	190.1	163.7	127.2	3221.1	7531.71	2721.77	21525.6	18536.1	14408.8		1851.47		21525.6	11046.9	5435.66	Not Found	Peak Found	Not Found	High	High	Peak Found	High	0.0009289	0.008318	1.55	20.06
[K].AASGEAKPK.[AV]	1xBiotin [K7]	3	3	P10412; P16403	P10412 [111-119]; P16403 [111-119]	P10412 1xBiotin [K117]; P16403 1xBiotin [K117]	Histone H1.4 [OS=Homo sapiens] Histone H1.2 [OS=Homo sapiens]	0	1084.55	5.285	35.4	164.6	33.1	17.6	42.6	225.3	153.7	127.7	4026.4	2142.86	5185.46	27405.5	18702	15537.4				27405.5	11145.8	5861.41	Not Found	Not Found	Not Found	High	High	High	High	0.0009289	0.01149	2.02	20.58
[K].LKGDDLQAIK.[KQ]	1xBiotin [K2]	6	2	P07910-1	P07910-1 [188-197]	P07910-1 1xBiotin [K189]	Heterogeneous nuclear ribonucleoproteins C1/C2 [OS=Homo sapiens]	1	1326.71	5.261	31.9	168.1	20.3	34	29.6	263.5	155.5	97	2543.91	4258.75	3701.55	32992.6	19473.1	12149.5				32992.6	11605.3	4583.34	Not Found	Not Found	Not Found	High	High	Peak Found	High	0.0008826	5.974e-05	3.08	37.82
[K].TPQHVKITDFGLAK.[L]	1xBiotin [K6]	1	2	P00533-1	P00533-1 [847-860]	P00533-1 1xBiotin [K852]	epidermal growth factor receptor [OS=Homo sapiens]	1	1780.94	5.258	27.6	172.4	27.4	39.3	28.4	184.1	176.8	144.1	4083.6	5852.04	4224.62	27430.2	26341	21473.5				27430.2	15698.3	8100.78	Not Found	Not Found	Not Found	High	Peak Found	Peak Found	High	0.0008826	0.0003924	3.94	42.04
[R].DWVVAPISVPENGKGPFPQR.[L]	1xBiotin [K14]	2	6	P22223-1	P22223-1 [108-127]	P22223-1 1xBiotin [K121]	Cadherin-3 [OS=Homo sapiens]	1	2419.22	5.213	34.6	165.4	21.4	37.1	36.1	172.8	193.6	139	3225.34	5596.47	5448.27	26042.5	29177.1	20943.7				26042.5	17388.5	7900.91	Not Found	Not Found	Not Found	High	High	High	High	0.0008826	0.002364	4.09	54.46
[R].SSGPYGGGGQYFAKPR.[N]	1xBiotin [K14]	3	3	P09651-1	P09651-1 [337-352]	P09651-1 1xBiotin [K350]	Heterogeneous nuclear ribonucleoprotein A1 [OS=Homo sapiens]	0	1854.86	5.205	32.2	167.8	30.8	71.6	21	186.6	160.4	129.6	3849.39	8939.39	2619.9	23296	20034.2	16186.6		2197.51		23296	11939.7	6106.31	Not Found	Peak Found	Not Found	High	High	Peak Found	High	0.0008826	2.635e-05	3.5	40.4
[K].DISQNKR.[A]	1xBiotin [K6]	3	5	P0DMV8	P0DMV8 [252-258]	P0DMV8 1xBiotin [K257]	heat shock 70 kDa protein 1A [OS=Homo sapiens]	1	1086.54	5.185	29.3	170.7	48.4	29.7	22.1	212.3	172.9	114.5	53870.5	33009.7	24573.6	236219	192380	127407	11617.7	8114.54	6383.23	236219	114652	48063.9	Peak Found	High	Peak Found	High	High	High	High	0.00223	0.03083	1.77	24.3
[K].DISLSDYKGK.[Y]	1xBiotin [K8]	1	2	Q06830	Q06830 [28-37]	Q06830 1xBiotin [K35]	peroxiredoxin-1 [OS=Homo sapiens]	1	1351.66	5.178	32.4	167.6	43.7	22.5	35.3	231.4	183	84	4505.27	2324.6	3647.69	23879.1	18888.4	8669.13				23879.1	11256.8	3270.39	Not Found	Not Found	Not Found	Peak Found	High	High	High	0.0009289	0.01322	1.87	41.99
[R].GLVGEIIKR.[F]	1xBiotin [K8]	4	1	P15531	P15531 [19-27]	P15531 1xBiotin [K26]	Nucleoside diphosphate kinase A [OS=Homo sapiens]	1	1210.7	5.148	48.6	151.4	43.4	44.2	23.8	231.2	134.9	122.5	3908.37	3984.04	2144.54	20837.3	12161.9	11039.2				20837.3	7248.06	4164.49	Not Found	Not Found	Not Found	High	Peak Found	Peak Found	High	0.00223	0.0246	1.96	44.44
[K].LLLQVQHASKQITADK.[Q]	1xBiotin [K]	1	2	P05141	P05141 [34-49]	P05141 1xBiotin [K]	ADP/ATP translocase 2 [OS=Homo sapiens]	1	2019.11	5.044	33.1	166.9	34.3	32.3	32.2	218.9	163	119.3	2162.99	2038.49	2029.33	13808.6	10282.2	7524.17				13808.6	6127.82	2838.46	Not Found	Not Found	Not Found	High	High	Peak Found	High	0.0009289	0.008943	2.23	39.96
[K].AAVTPGKK.[A]	1xBiotin [K7]	1	2	P19338	P19338 [81-88]	P19338 1xBiotin [K87]	Nucleolin [OS=Homo sapiens]	1	997.55	5.042	33.1	166.9	38.1	31.8	23.3	255.3	160.5	91.1	4259.81	3557.68	2599.45	28533.4	17936.5	10181.5				28533.4	10689.5	3840.92	Not Found	Not Found	Not Found	High	High	Peak Found	High	0.0009289	0.01344	2.22	23.32
[R].EMLQQSKILK.[VY]	1xBiotin [K7]; 1xOxidation [M2]	4	2	P07900; P08238	P07900 [401-410]; P08238 [393-402]	P07900 1xBiotin [K407]; P08238 1xBiotin [K399]	Heat shock protein HSP 90-alpha [OS=Homo sapiens] Heat shock protein HSP 90-beta [OS=Homo sapiens]	1	1459.76	5.01	26.5	173.5	24	25.9	59	201.3	169.5	120.2	2251.82	2430.93	5539.32	18891.9	15906.8	11281.9				18891.9	9479.88	4256.03	Not Found	Not Found	Not Found	High	High	Peak Found	High	0.0009289	0.01381	2.6	36.63
[K].EKTHINIVVIGHVDSGK.[S]	1xBiotin [K2]	4	1	P68104	P68104 [4-20]	P68104 1xBiotin [K5]	Elongation factor 1-alpha 1 [OS=Homo sapiens]	1	2072.1	4.989	33.4	166.6	46.3	18.7	31.2	205.1	155.9	142.8	5362.4	2166.44	3619.66	23756.4	18057.5	16539.7				23756.4	10761.6	6239.52	Not Found	Not Found	Not Found	Peak Found	Peak Found	High	High	0.0008826	0.0007188	3.23	40.37
[R].VAPEEHPVLLTEAPLNPKANR.[E]	1xBiotin [K18]	2	4	P60709	P60709 [96-116]	P60709 1xBiotin [K113]	Actin, cytoplasmic 1 [OS=Homo sapiens]	1	2521.32	4.988	33.4	166.6	45.3	35.4	11.1	214	176.7	117.4	18285.7	14305.5	4500.44	86422.9	71355.2	47382.3	3943.48	3516.63		86422.9	42525.2	17874.8	Peak Found	Peak Found	Not Found	High	High	Peak Found	High	0.0008826	2.838e-07	5.54	44.85
[K].KAAVTPGK.[K]	1xBiotin [K1]	1	2	P19338	P19338 [80-87]	P19338 1xBiotin [K80]	Nucleolin [OS=Homo sapiens]	1	997.55	4.974	42.2	157.8	18	42.1	42.8	250.4	157.4	89.3	2046.81	4796.24	4881.74	28533.4	17936.5	10181.5				28533.4	10689.5	3840.92	Not Found	Not Found	Not Found	High	High	Peak Found	High	0.0009289	0.003949	2.33	23.32
[R].KESYSIYVYK.[V]	1xBiotin [K1]	7	2	Q16778	Q16778 [35-44]	Q16778 1xBiotin [K35]	Histone H2B type 2-E [OS=Homo sapiens]	1	1505.73	4.961	37.9	162.1	37.5	22.4	39.6	160	196.4	144.2	4934.58	2944.73	5214.09	21082.6	25868.4	18995.6				21082.6	15416.7	7165.99	Not Found	Not Found	Not Found	High	High	Peak Found	High	0.0008826	0.0001362	2.45	41.55
[R].VQGKGYCLPEPIQLLDEEK.[I]	1xBiotin [K4]; 1xCarbamidomethyl [C7]	2	4	AGIA-fabID; EGFR-fabID	AGIA-fabID [279-297]; EGFR-fabID [299-317]	AGIA-fabID 1xBiotin [K282]; EGFR-fabID 1xBiotin [K302]	Heavy Heavy	1	2442.2	4.935	38.1	161.9	36.1	37	29.6	146.2	198	153.1	4953.42	5077.82	4071.22	20089.9	27200.2	21028				20089.9	16210.4	7932.74	Not Found	Not Found	Not Found	High	High	High	High	0.0009289	0.005211	3.56	56.69
[R].EESGKPGAHVTVKK.[L]	1xBiotin [K]	2	4	P22626	P22626 [100-113]	P22626 1xBiotin [K]	heterogeneous nuclear ribonucleoproteins A2/B1 [OS=Homo sapiens]	1	1692.87	4.849	34.2	165.8	21.4	31.7	54.6	202.3	153.5	136.5	9528.26	14106.6	24334	90117.8	68408.6	60815.4	2054.86	3467.72	6320.99	90117.8	40769.1	22942.3	Peak Found	Peak Found	Peak Found	High	Peak Found	High	High	0.0008826	0.0002989	2.47	21.58
[K].KGEDFVK.[T]	1xBiotin [K1]	2	1	P40926	P40926 [329-335]	P40926 1xBiotin [K329]	Malate dehydrogenase, mitochondrial [OS=Homo sapiens]	1	1048.51	4.77	34.7	165.3	38.4	44.7	30.9	225.3	183.3	77.4	2905.88	3383.22	2333.83	17033.7	13862.3	5851.73				17033.7	8261.47	2207.54	Not Found	Not Found	Not Found	Peak Found	High	Peak Found	High	0.001693	0.01995	1.94	32.28
[R].NFLKEDAMKTK.[T]	1xBiotin [K9]; 1xOxidation [M8]	1	1	Q29983	Q29983 [167-177]	Q29983 1xBiotin [K175]	MHC class I polypeptide-related sequence A [OS=Homo sapiens]	2	1566.77	4.763	37.4	162.6	33.9	24.6	44.8	135.5	213.5	147.7	3907.81	2831.07	5159.28	15600.5	24574.9	17004.2				15600.5	14645.8	6414.75	Not Found	Not Found	Not Found	Peak Found	High	Peak Found	High	0.0009289	0.01172	2.82	31.31
[R].KFLPLFDR.[V]	1xBiotin [K1]	1	2	P61604	P61604 [8-15]	P61604 1xBiotin [K8]	10 kDa heat shock protein, mitochondrial [OS=Homo sapiens]	1	1261.68	4.716	35	165	43.9	31.6	36.4	254.5	61.6	171.8	4363.35	3138.83	3618.2	25276.5	6119.59	17063				25276.5	3647.07	6436.94	Not Found	Not Found	Not Found	High	Peak Found	Peak Found	High	0.0009289	0.004038	2.19	54.74
[K].KELSDIAHR.[I]	1xBiotin [K1]	2	1	P04075	P04075 [14-22]	P04075 1xBiotin [K14]	fructose-bisphosphate aldolase A [OS=Homo sapiens]	1	1294.66	4.714	32.6	167.4	112	24.2	23.2	206.8	109.5	124.3	21308.8	4601.08	4417.9	39335.5	20826.5	23648.6	4595.45			39335.5	12411.8	8921.32	Peak Found	Not Found	Not Found	High	Peak Found	Peak Found	High	0.0008826	0.0004305	3.16	33.14
[K].SKGIAYIEFK.[T]	1xBiotin [K2]	1	2	P19338	P19338 [428-437]	P19338 1xBiotin [K429]	Nucleolin [OS=Homo sapiens]	1	1381.72	4.698	35.1	164.9	47.4	23.1	28.5	265.1	133.8	102.1	4673.61	2280.67	2807.07	26130.2	13187.4	10058.4				26130.2	7859.25	3794.47	Not Found	Not Found	Not Found	High	High	Peak Found	High	0.0009289	0.004514	2.35	47.4
[K].SGFNSKSGQR.[G]	1xBiotin [K6]	3	3	P07910-1	P07910-1 [171-180]	P07910-1 1xBiotin [K176]	Heterogeneous nuclear ribonucleoproteins C1/C2 [OS=Homo sapiens]	1	1293.6	4.689	34.5	165.5	33.3	54.5	21.2	232.1	159.6	99.4	4671.69	7644.15	2974.76	32585.6	22400.8	13948		1879.11		32585.6	13350.1	5261.83	Not Found	Peak Found	Not Found	High	Peak Found	High	High	0.001298	0.01541	2.53	26.3
[K].LDSGKELHINLIPNK.[Q]	1xBiotin [K5]	3	2	P07900	P07900 [70-84]	P07900 1xBiotin [K74]	Heat shock protein HSP 90-alpha [OS=Homo sapiens]	1	1917.03	4.566	32.3	167.7	51.3	24.6	29.1	232.1	150.8	112.1	5870.01	2808.26	3327.8	26553.7	17247.9	12821.7				26553.7	10279.2	4836.92	Not Found	Not Found	Not Found	High	Peak Found	Peak Found	High	0.0008826	0.001842	3.73	46.12
[R].STLEPVEKALR.[D]	1xBiotin [K8]	4	1	P0DMV8	P0DMV8 [312-322]	P0DMV8 1xBiotin [K319]	heat shock 70 kDa protein 1A [OS=Homo sapiens]	1	1468.78	4.534	40.3	159.7	36.3	25.4	47.1	213.4	144.1	133.7	3589.92	2511.63	4649.5	21079.5	14235.9	13212.9				21079.5	8484.08	4984.5	Not Found	Not Found	Not Found	High	Peak Found	Peak Found	High	0.0008826	0.002676	2.34	42.87
[R].INFDKYHPGYFGK.[V]	1xBiotin [K5]	1	2	P46776	P46776 [43-55]	P46776 1xBiotin [K47]	60S ribosomal protein L27a [OS=Homo sapiens]	1	1811.86	4.533	30.6	169.4	29.7	50.7	29.2	229.6	164	96.9	3380.2	5773.84	3326.83	26174.2	18698.5	11041.1				26174.2	11143.7	4165.22	Not Found	Not Found	Not Found	High	High	Peak Found	High	0.0008826	0.002089	2.9	44.93
[R].LKVGLQVVAVK.[A]	1xBiotin [K2]	1	4	P10809	P10809 [291-301]	P10809 1xBiotin [K292]	60 kDa heat shock protein, mitochondrial [OS=Homo sapiens]	1	1379.84	4.501	29.4	170.6	29	50.7	24.7	228	168.2	99.6	3024.95	5292.31	2576.51	23820.1	17569.4	10404.4				23820.1	10470.8	3925.01	Not Found	Not Found	Not Found	High	High	High	High	0.0009289	0.003582	2.76	46.21
[K].AQYKSLIGVEYKPVSATGAEDK.[D]	1xBiotin [K4]	1	2	P07814	P07814 [940-961]	P07814 1xBiotin [K943]	Bifunctional glutamate/proline--tRNA ligase [OS=Homo sapiens]	1	2580.3	4.462	36.9	163.1	38.6	30.1	41.2	185.8	170.3	134.1	2719.98	2120.46	2906.74	13108.1	12011.5	9461.63				13108.1	7158.41	3569.36	Not Found	Not Found	Not Found	High	High	Peak Found	High	0.0009289	0.00331	3.92	43.93
[R].KESYSVYVYK.[V]	1xBiotin [K1]	10	3	P58876; Q93079	P58876 [35-44]; Q93079 [35-44]	P58876 1xBiotin [K35]; Q93079 1xBiotin [K35]	Histone H2B type 1-D [OS=Homo sapiens] Histone H2B type 1-H [OS=Homo sapiens]	1	1491.72	4.453	36.7	163.3	9.1	34.5	52.1	120.9	229.9	153.5	2531.02	9550.71	14444.9	33499	63695.4	42524.9		2347.79	3752.19	33499	37960.2	16042.3	Not Found	Peak Found	Peak Found	High	High	High	High	0.0008826	0.0001345	3	39.19
[R].IMKAQALR.[D]	1xBiotin [K3]; 1xOxidation [M2]	4	4	P07900; P08238	P07900 [613-620]; P08238 [605-612]	P07900 1xBiotin [K615]; P08238 1xBiotin [K607]	Heat shock protein HSP 90-alpha [OS=Homo sapiens] Heat shock protein HSP 90-beta [OS=Homo sapiens]	1	1172.63	4.416	36.9	163.1	40.1	53.3	18.9	211.2	176.9	99.7	10801.5	14362.4	5107.11	56960.3	47697.2	26874.3	2329.45	3530.61		56960.3	28425.9	10138.2	Peak Found	Peak Found	Not Found	High	High	Peak Found	High	0.0009289	0.005023	2.2	31.85
[R].KISSPTGSK.[D]	1xBiotin [K1]	2	1	Q99623	Q99623 [89-97]	Q99623 1xBiotin [K89]	Prohibitin-2 [OS=Homo sapiens]	1	1130.59	4.366	31.1	168.9	28.8	31	57	189.2	168.4	125.7	2288.76	2466.68	4527.79	15037.4	13384.8	9993.31				15037.4	7976.87	3769.93	Not Found	Not Found	Not Found	High	Peak Found	Peak Found	High	0.003241	0.05211	1.32	23.39
[K].ETQKSIYYITGESK.[E]	1xBiotin [K4]	1	3	P08238	P08238 [478-491]	P08238 1xBiotin [K481]	Heat shock protein HSP 90-beta [OS=Homo sapiens]	1	1872.9	4.359	35.5	164.5	56.1	29.9	27.3	244.5	138.7	103.6	4131.45	2200.93	2008.98	18009.1	10213	7626.7				18009.1	6086.61	2877.14	Not Found	Not Found	Not Found	High	High	High	High	0.0008826	0.001428	2.91	42.81
[K].KLEDGPK.[F]	1xBiotin [K1]	3	4	P68104	P68104 [386-392]	P68104 1xBiotin [K386]	Elongation factor 1-alpha 1 [OS=Homo sapiens]	1	1012.51	4.33	37.5	162.5	48.4	27.5	36.2	193.5	156.8	137.6	24734	14064.6	18514.4	98883.7	80165.6	70310.4	5334.13	3457.4	4809.29	98883.7	47775.9	26524.3	Peak Found	Peak Found	Peak Found	High	High	High	High	0.0009289	0.006949	2.32	24.34
[R].KGNYSER.[V]	1xBiotin [K1]	3	2	Q7L7L0	Q7L7L0 [37-43]	Q7L7L0 1xBiotin [K37]	Histone H2A type 3 [OS=Homo sapiens]	1	1079.49	4.328	37.5	162.5	31.5	55.6	32.1	289.7	139.1	52	2581.78	4559.86	2636.34	23769.9	11410.4	4269.31				23769.9	6800.17	1610.58	Not Found	Not Found	Not Found	High	High	Peak Found	High	0.001693	0.01968	1.78	21.51
[R].KLLEGEESR.[LI]	1xBiotin [K1]	7	2	P08670	P08670 [402-410]	P08670 1xBiotin [K402]	Vimentin [OS=Homo sapiens]	1	1286.64	4.286	53.2	146.8	25.4	44.4	54.9	243.9	122.6	108.9	2391.08	4177.83	5166.72	22956.8	11536.3	10247.8				22956.8	6875.23	3865.94	Not Found	Not Found	Not Found	High	High	Peak Found	High	0.0008826	0.001648	2.36	33.14
[K].EGLELLKTAIGK.[A]	1xBiotin [K7]	2	4	P06733-1	P06733-1 [222-233]	P06733-1 1xBiotin [K228]	alpha-enolase [OS=Homo sapiens]	1	1497.83	4.279	37.9	162.1	33.2	33.5	39.5	252.7	143.3	97.8	4512.45	4553.89	5367.05	34355.2	19487.5	13291.3				34355.2	11613.9	5014.1	Not Found	Not Found	Not Found	High	High	High	High	0.0008826	0.0004234	2.55	54.6
[R].MQKEITALAPSTMK.[I]	1xBiotin [K3]; 1xOxidation [M]	7	4	P60709	P60709 [313-326]	P60709 1xBiotin [K315]	Actin, cytoplasmic 1 [OS=Homo sapiens]	1	1790.88	4.279	37.9	162.1	36.7	44.7	41.2	220.7	176.2	80.5	3234.39	3938.46	3628.05	19444.1	15524.3	7094.07				19444.1	9251.97	2676.21	Not Found	Not Found	Not Found	High	High	Peak Found	High	0.0008826	0.0001944	3.4	41.36
[K].YIDQEELNKTKPIWTR.[N]	1xBiotin [K9]	5	1	P07900; P08238	P07900 [284-299]; P08238 [276-291]	P07900 1xBiotin [K292]; P08238 1xBiotin [K284]	Heat shock protein HSP 90-alpha [OS=Homo sapiens] Heat shock protein HSP 90-beta [OS=Homo sapiens]	1	2260.14	4.273	37.9	162.1	52	33.2	34.7	255.6	148.3	76.2	5646.32	3606.9	3768.76	27766	16103	8276.96				27766	9596.86	3122.45	Not Found	Not Found	Not Found	High	Peak Found	Peak Found	High	0.0008826	0.0003333	4.02	45.22
[K].IKVLGSGAFGTVYK.[G]	1xBiotin [K2]	1	2	P00533-1	P00533-1 [715-728]	P00533-1 1xBiotin [K716]	epidermal growth factor receptor [OS=Homo sapiens]	1	1665.9	4.259	38	162	30.8	43.8	31.4	234.6	133.9	125.4	2332.83	3318.83	2381.91	17769.4	10144.6	9502.77				17769.4	6045.82	3584.88	Not Found	Not Found	Not Found	High	High	Peak Found	High	0.0008826	0.0002048	3	48.49
[K].QLATKAAR.[K]	1xBiotin [K5]	4	2	P84243	P84243 [20-27]	P84243 1xBiotin [K24]	histone H3.3 [OS=Homo sapiens]	1	1084.59	4.252	38.1	161.9	36	32.7	39.2	306.6	153	32.5	4570.42	4159.59	4975.79	38951.7	19432.8	4134.71				38951.7	11581.3		Not Found	Not Found	Not Found	High	High	Not Found	High	0.0009289	0.003275	2.21	26.72
[-].MPDPAKSAPAPK.[K]	1xBiotin [K6]; 1xMet-loss [N-Term]	4	2	Q93079	Q93079 [1-12]	Q93079 1xBiotin [K6]; 1xMet-loss [N-Term]	Histone H2B type 1-H [OS=Homo sapiens]	1	1304.67	4.233	27.6	172.4	51.5	26.8	30.3	218	189.1	84.2	4436	2312.27	2612.19	18779.6	16287.7	7257.25				18779.6	9706.9	2737.76	Not Found	Not Found	Not Found	High	High	Peak Found	High	0.0008826	0.0003564	3.12	26.03
[K].AVAASKER.[NS]	1xBiotin [K6]	4	2	P10412; P16403	P10412 [47-54]; P16403 [47-54]	P10412 1xBiotin [K52]; P16403 1xBiotin [K52]	Histone H1.4 [OS=Homo sapiens] Histone H1.2 [OS=Homo sapiens]	1	1057.55	4.207	34.6	165.4	81.8	22.5	37.5	184.6	179.2	94.5	29105.3	7992.33	13330.5	65691.9	63784.6	33625.6	6276.83	1964.7	3462.74	65691.9	38013.4	12685.1	Peak Found	Peak Found	Peak Found	High	Peak Found	High	High	0.0009289	0.01504	1.79	21.86
[K].AKMQASIEK.[GA]	1xBiotin [K2]; 1xOxidation [M3]	3	2	P06748	P06748 [249-257]	P06748 1xBiotin [K250]	Nucleophosmin [OS=Homo sapiens]	1	1247.61	4.197	38.5	161.5	38.4	79	22.1	179.8	161.2	119.5	5746.23	11814.2	3305.16	26900.3	24115.8	17875		2904.19		26900.3	14372.2	6743.27	Not Found	Peak Found	Not Found	High	High	Peak Found	High	0.0009289	0.008399	2.43	23.93
[K].KPAAATVTK.[K]	1xBiotin [K1]	1	2	P16403	P16403 [160-168]	P16403 1xBiotin [K160]	Histone H1.2 [OS=Homo sapiens]	0	1112.61	4.16	42.9	157.1	46	17.8	46.2	247.9	168.3	73.9	5460.47	2111.12	5493.05	29448.4	19989.8	8782.41				29448.4	11913.2	3313.12	Not Found	Not Found	Not Found	High	High	Peak Found	High	0.0008826	0.001671	2.57	24.79
[R].KASDVHEVR.[K]	1xBiotin [K1]	3	1	P14618	P14618 [247-255]	P14618 1xBiotin [K247]	Pyruvate kinase PKM [OS=Homo sapiens]	1	1266.63	4.123	36.2	163.8	54.1	29.9	31.7	223.1	143.4	117.8	5835.48	3221.54	3423.19	24060.2	15465.3	12708.2				24060.2	9216.78	4794.1	Not Found	Not Found	Not Found	Peak Found	High	Peak Found	High	0.0008826	0.001278	2.26	21.09
[K].SIDLKDK.[Y]	1xBiotin [K5]	2	1	P10809	P10809 [83-89]	P10809 1xBiotin [K87]	60 kDa heat shock protein, mitochondrial [OS=Homo sapiens]	1	1044.54	4.093	47.8	152.2	54.4	22.1	47	236.2	149.8	90.5	5024.45	2041.73	4339.78	21811.1	13835.4	8357.47				21811.1	8245.44	3152.82	Not Found	Not Found	Not Found	High	Peak Found	Peak Found	High	0.002374	0.03715	1.7	34.21
[K].MQASIEKGGSLPK.[V]	1xBiotin [K7]; 1xOxidation [M1]	2	2	P06748	P06748 [251-263]	P06748 1xBiotin [K257]	Nucleophosmin [OS=Homo sapiens]	1	1587.79	4.051	38.8	161.2	37.4	30.5	75.1	178.3	155.3	123.5	2468.21	2012.83	4958.65	11770.6	10251.4	8154.23				11770.6	6109.47	3076.15	Not Found	Not Found	Not Found	High	High	Peak Found	High	0.0008826	0.000279	3.02	34.51
[K].KVTHAVVTVPAYFNDAQR.[Q]	1xBiotin [K1]	1	1	P11021	P11021 [164-181]	P11021 1xBiotin [K164]	78 kDa glucose-regulated protein [OS=Homo sapiens]	1	2242.14	4.051	39.6	160.4	56.9	30	35.9	245.9	145.4	85.9	5259.18	2778.12	3318.85	22743.1	13443.1	7947.72				22743.1	8011.59	2998.24	Not Found	Not Found	Not Found	High	Peak Found	Peak Found	High	0.0008826	1.776e-06	4.58	42.72
[R].MQKEITALAPSTMK.[I]	1xBiotin [K3]; 2xOxidation [M1; M13]	7	3	P60709	P60709 [313-326]	P60709 1xBiotin [K315]	Actin, cytoplasmic 1 [OS=Homo sapiens]	1	1806.88	4.049	39.6	160.4	46.7	42.2	25.3	178.2	171	136.6	4945	4470.04	2680.57	18863.3	18097.1	14456.3				18863.3	10785.2	5453.57	Not Found	Not Found	Not Found	High	High	Peak Found	High	0.0008826	0.0009517	2.66	38.8
[K].DSYVGDEAQSKR.[G]	1xBiotin [K11]	6	3	P60709	P60709 [51-62]	P60709 1xBiotin [K61]	Actin, cytoplasmic 1 [OS=Homo sapiens]	1	1580.7	4.035	42.7	157.3	45.8	26.3	41.5	184.9	153	148.5	5908.98	3394.59	5351.16	23843.3	19724.3	19149.8				23843.3	11755	7224.18	Not Found	Not Found	Not Found	High	High	High	High	0.0008826	0.0003033	2.02	30.43
[R].AGKIVVNLTGR.[L]	1xBiotin [K3]	1	1	P62244	P62244 [58-68]	P62244 1xBiotin [K60]	40S ribosomal protein S15a [OS=Homo sapiens]	1	1353.77	4.028	39.8	160.2	60.6	38.8	28	269.5	156.5	46.6	4460.09	2858.28	2056.66	19824.6	11512.4	3431.45				19824.6	6860.99		Not Found	Not Found	Not Found	High	Peak Found	Not Found	High	0.0008826	0.0009864	2.75	42.9
[R].DPASKR.[S]	1xBiotin [K5]	2	2	P22626	P22626 [55-60]	P22626 1xBiotin [K59]	heterogeneous nuclear ribonucleoproteins A2/B1 [OS=Homo sapiens]	1	899.44	4.007	39.9	160.1	27.4	40.1	50	160.6	194.1	127.9	2787.9	4074.75	5085.84	16328.8	19737.3	13004.6				16328.8	11762.7	4905.93	Not Found	Not Found	Not Found	High	Peak Found	High	High	0.003389	0.05747	1.86	20.29
[K].SKEYFSK.[Q]	1xBiotin [K2]	1	1	Q06830	Q06830 [191-197]	Q06830 1xBiotin [K192]	peroxiredoxin-1 [OS=Homo sapiens]	1	1114.52	3.988	37.4	162.6	27.1	27.7	82.1	327.5	14.8	120.8	3922.01	4019.39	11896.8	47445.8	2140.97	17493.3			3090.32	47445.8		6599.25	Not Found	Not Found	Peak Found	High	Not Found	Peak Found	High	0.0009289	0.007455	2.37	32.91
[R].IGAEVYHNLKNVIK.[E]	1xBiotin [K10]	2	2	P06733-1	P06733-1 [184-197]	P06733-1 1xBiotin [K193]	alpha-enolase [OS=Homo sapiens]	1	1823.98	3.925	53	147	56	46.1	29.7	219.8	127.8	120.7	4765.86	3921.24	2523.56	18704.2	10874.7	10269.1				18704.2	6480.95	3873.99	Not Found	Not Found	Not Found	High	High	Peak Found	High	0.0008826	0.002173	3.15	46.24
[K].QPVGGGQKLLTR.[K]	1xBiotin [K8]	3	1	Q14978-1	Q14978-1 [408-419]	Q14978-1 1xBiotin [K415]	nucleolar and coiled-body phosphoprotein 1 [OS=Homo sapiens]	1	1479.81	3.911	40.7	159.3	24	43.2	47.4	146.9	169.6	168.9	2307.72	4146.57	4548.87	14105.4	16285.9	16217.4				14105.4	9705.83	6117.94	Not Found	Not Found	Not Found	High	Peak Found	Peak Found	High	0.0008826	0.001431	2.49	36.21
[K].KAAGGATPK.[K]	1xBiotin [K1]	1	1	P16403	P16403 [140-148]	P16403 1xBiotin [K140]	Histone H1.2 [OS=Homo sapiens]	1	1026.54	3.898	40.8	159.2	23.2	47.9	38.7	266.9	150.8	72.5	2469.91	5098.62	4119.52	28412.4	16058.1	7722.47				28412.4	9570.07	2913.27	Not Found	Not Found	Not Found	High	Peak Found	Peak Found	High	0.0009289	0.00625	2.42	18.48
[R].KEAAENSLVAYK.[A]	1xBiotin [K1]	2	2	P62258-1	P62258-1 [142-153]	P62258-1 1xBiotin [K142]	14-3-3 protein epsilon [OS=Homo sapiens]	1	1548.77	3.864	41.1	158.9	44.1	26.9	35.5	258.6	137.3	97.6	3989.85	2437.89	3216.29	23400.5	12427	8830.9				23400.5	7406.07	3331.42	Not Found	Not Found	Not Found	High	High	Peak Found	High	0.0008826	0.0002228	2.95	35.7
[K].ELHINLIPNKQDR.[T]	1xBiotin [K10]	2	2	P07900	P07900 [75-87]	P07900 1xBiotin [K84]	Heat shock protein HSP 90-alpha [OS=Homo sapiens]	1	1815.95	3.846	41.9	158.1	45.3	29.7	34.3	247	129.4	114.4	3622.32	2378.09	2740.92	19751	10347.3	9145.37				19751	6166.66	3450.05	Not Found	Not Found	Not Found	High	Peak Found	Peak Found	High	0.0009289	0.00633	2.64	45.22
[K].KLFVGGLK.[EG]	1xBiotin [K1]	9	4	P51991-1; P22626; P09651-1	P51991-1 [127-134]; P22626 [113-120]; P09651-1 [106-113]	P51991-1 1xBiotin [K127]; P22626 1xBiotin [K113]; P09651-1 1xBiotin [K106]	Heterogeneous nuclear ribonucleoprotein A3 [OS=Homo sapiens] heterogeneous nuclear ribonucleoproteins A2/B1 [OS=Homo sapiens] Heterogeneous nuclear ribonucleoprotein A1 [OS=Homo sapiens]	1	1087.63	3.84	43.7	156.3	40	25.5	52.4	201.1	143.3	137.7	28522.6	18165.3	37339.1	143384	102135	98158.6	6151.17	4465.45	9699.19	143384	60869	37029.9	Peak Found	Peak Found	Peak Found	High	High	High	High	0.0009289	0.008695	2.11	41.61
[K].FDLMYAKR.[A]	1xBiotin [K7]; 1xOxidation [M4]	12	5	P68363	P68363 [395-402]	P68363 1xBiotin [K401]	Tubulin alpha-1B chain [OS=Homo sapiens]	1	1285.61	3.834	39.5	160.5	70.5	34.3	32.2	200.5	139.1	123.5	11642.3	5655.9	5317.32	33092.5	22955.4	20387.8	2510.79			33092.5	13680.6	7691.2	Peak Found	Not Found	Not Found	High	High	High	High	0.0008826	0.002236	2.44	41.58
[K].VGEFSGANKEK.[L]	1xBiotin [K9]	2	2	P10599-1	P10599-1 [86-96]	P10599-1 1xBiotin [K94]	thioredoxin [OS=Homo sapiens]	1	1391.66	3.831	39.8	160.2	62.1	23.4	37.5	236.6	150.7	89.7	5593.2	2110.09	3375.7	21314.1	13573.7	8083.99				21314.1	8089.46	3049.65	Not Found	Not Found	Not Found	High	High	Peak Found	High	0.0008826	0.0003291	2.94	30.72
[R].KGAAPAPPR.[K]	1xBiotin [K1]	8	1	Q13428-1	Q13428-1 [449-457]	Q13428-1 1xBiotin [K449]	Treacle protein [OS=Homo sapiens]	1	1090.58	3.813	37.2	162.8	53.8	35.8	34.3	130.8	188.2	157.1	3414.88	2276.45	2178.31	8305.21	11954	9975.44				8305.21	7124.14	3763.19	Not Found	Not Found	Not Found	Peak Found	High	Peak Found	High	0.0009289	0.01065	1.39	24.64
[K].KFYEQFSK.[N]	1xBiotin [K1]	2	2	P07900	P07900 [436-443]	P07900 1xBiotin [K436]	Heat shock protein HSP 90-alpha [OS=Homo sapiens]	1	1302.62	3.807	41.6	158.4	34	31.2	51.3	290.4	129.3	63.8	3506.14	3216.67	5297.32	29965.5	13347.1	6585.63				29965.5	7954.4	2484.4	Not Found	Not Found	Not Found	High	High	Peak Found	High	0.0008826	0.002502	2.59	39.34
[K].KGQSEEIQK.[K]	1xBiotin [K1]	1	2	P83731	P83731 [61-69]	P83731 1xBiotin [K61]	60S ribosomal protein L24 [OS=Homo sapiens]	1	1272.63	3.759	33	167	24.1	40.7	56.1	211	206.1	61.9	2245.63	3800.63	5238.1	19687.9	19229.5	5776.86				19687.9	11460.1	2179.29	Not Found	Not Found	Not Found	High	High	Peak Found	High	0.0008826	0.001682	3.21	22.19
[R].EAPHVKNNAIISLR.[K]	1xBiotin [K6]	1	1	Q9ULF5	Q9ULF5 [312-325]	Q9ULF5 1xBiotin [K317]	Zinc transporter ZIP10 [OS=Homo sapiens]	1	1787.96	3.752	42.1	157.9	45.4	22.1	58.3	123.6	170.4	180.2	4271.71	2077.63	5484.94	11627.3	16027.9	16947.7				11627.3	9552.05	6393.46	Not Found	Not Found	Not Found	High	Peak Found	Peak Found	High	0.0009289	0.004351	2.89	40.07
[K].HEKFSEVLK.[R]	1xBiotin [K3]	1	1	P12277	P12277 [305-313]	P12277 1xBiotin [K307]	Creatine kinase B-type [OS=Homo sapiens]	1	1342.68	3.723	38.2	161.8	59.7	27.9	35.8	222.4	151.6	102.7	5756.09	2687.87	3449.36	21432.8	14608.8	9898.86				21432.8	8706.36	3734.3	Not Found	Not Found	Not Found	High	Peak Found	Peak Found	High	0.0009289	0.007015	2.96	37.26
[K].ITITNDKGR.[L]	1xBiotin [K7]	6	8	P11142-1; P0DMV8	P11142-1 [501-509]; P0DMV8 [501-509]	P11142-1 1xBiotin [K507]; P0DMV8 1xBiotin [K507]	Heat shock cognate 71 kDa protein [OS=Homo sapiens] heat shock 70 kDa protein 1A [OS=Homo sapiens]	1	1243.65	3.708	34.9	165.1	65.6	34.3	25	219.9	162.5	92.7	88699	46450.9	33801.8	297414	219799	125334	19128.8	11418.7	8780.34	297414	130993	47281.8	Peak Found	High	High	High	High	High	High	0.0008826	0.001398	2.77	31.9
[K].IGHPAPNFKATAVMPDGQFK.[D]	1xBiotin [K9]; 1xOxidation [M14]	1	1	Q06830	Q06830 [8-27]	Q06830 1xBiotin [K16]	peroxiredoxin-1 [OS=Homo sapiens]	1	2368.16	3.699	42.6	157.4	62.5	25.6	43.3	188.1	160.2	120.2	4890.06	2005.1	3389.64	14717.8	12536.9	9400.8				14717.8	7471.57	3546.41	Not Found	Not Found	Not Found	High	Peak Found	Peak Found	High	0.001693	0.02017	3.44	40.48
[R].IFAPNHVVAKSR.[F]	1xBiotin [K10]	1	1	Q02543	Q02543 [32-43]	Q02543 1xBiotin [K41]	60S ribosomal protein L18a [OS=Homo sapiens]	1	1564.84	3.691	42.6	157.4	55.2	32.8	36.1	257.1	133.2	85.6	3764.04	2236.18	2460.27	17537.9	9081.95	5841.02				17537.9	5412.53		Not Found	Not Found	Not Found	High	Peak Found	Not Found	High	0.0009289	0.00425	2.4	34.71
[R].LNGDFAQLNLKIK.[F]	1xBiotin [K11]	2	2	P19022	P19022 [657-669]	P19022 1xBiotin [K667]	Cadherin-2 [OS=Homo sapiens]	1	1699.92	3.689	41.9	158.1	49.5	40.3	41.7	148.5	162.8	157.2	4827.27	3929.51	4071.06	14497.4	15892.1	15346.7				14497.4	9471.14	5789.47	Not Found	Not Found	Not Found	High	High	Peak Found	High	0.0008826	0.0001699	3.22	51.01
[R].TLKIPAMTIAK.[N]	1xBiotin [K3]; 1xOxidation [M7]	1	1	P10809	P10809 [471-481]	P10809 1xBiotin [K473]	60 kDa heat shock protein, mitochondrial [OS=Homo sapiens]	1	1428.8	3.689	44.8	155.2	31.5	40.9	54.1	199.7	141.6	132.1	3283.68	4257.47	5636.57	20794.3	14741.8	13755.9				20794.3	8785.59	5189.36	Not Found	Not Found	Not Found	High	Peak Found	Peak Found	High	0.0009289	0.01441	2.13	39.83
[K].IKDTVLQR.[T]	1xBiotin [K2]	2	1	P22102-1	P22102-1 [250-257]	P22102-1 1xBiotin [K251]	trifunctional purine biosynthetic protein adenosine-3 [OS=Homo sapiens]	1	1198.66	3.682	57.3	142.7	31.9	55.9	53.1	205.9	132.2	120.9	3011.8	5277.42	5007.97	19429.2	12475.4	11403.4				19429.2	7434.91	4301.88	Not Found	Not Found	Not Found	High	Peak Found	Peak Found	High	0.003241	0.04837	2.32	37.84
[K].VTKDGVTVAK.[S]	1xBiotin [K3]	2	2	P10809	P10809 [73-82]	P10809 1xBiotin [K75]	60 kDa heat shock protein, mitochondrial [OS=Homo sapiens]	1	1243.67	3.661	42.9	157.1	38.7	31.6	36.6	272.8	133.8	86.5	4546.33	3707.93	4291.26	32028.7	15711.4	10153				32028.7	9363.43	3830.17	Not Found	Not Found	Not Found	High	High	Peak Found	High	0.0009289	0.00713	2.86	32.25
[K].ALAAAGYDVEKNNSR.[I]	1xBiotin [K11]	5	2	P10412; P16403	P10412 [65-79]; P16403 [65-79]	P10412 1xBiotin [K75]; P16403 1xBiotin [K75]	Histone H1.4 [OS=Homo sapiens] Histone H1.2 [OS=Homo sapiens]	1	1804.86	3.628	43.2	156.8	72.2	39.9	36.4	169.8	137.1	144.6	4781.36	2639.18	2407.83	11236.8	9075.22	9574.41				11236.8	5408.51	3611.91	Not Found	Not Found	Not Found	High	High	Peak Found	High	0.0008826	0.0001025	4.12	35.68
[K].AAATPAKK.[T]	1xBiotin [K7]	1	1	P19338	P19338 [89-96]	P19338 1xBiotin [K95]	Nucleolin [OS=Homo sapiens]	1	983.534	3.622	38.5	161.5	67.5	37.4	36.5	169.6	156.8	132.2	4614.96	2555.36	2495.24	11596	10717.4	9037.71				11596	6387.21	3409.44	Not Found	Not Found	Not Found	High	Peak Found	Peak Found	High	0.00223	0.02407	2.53	20.11
[R].FEQKGFR.[L]	1xBiotin [K4]	5	1	P15531	P15531 [28-34]	P15531 1xBiotin [K31]	Nucleoside diphosphate kinase A [OS=Homo sapiens]	1	1137.55	3.605	43.4	156.6	43.2	43.4	31.3	215.3	155.6	111.1	5154.89	5185.08	3738.9	25715.7	18585.2	13268.5				25715.7	11076.1	5005.5	Not Found	Not Found	Not Found	High	Peak Found	Peak Found	High	0.00223	0.02634	1.96	34.54
[K].GKGGEIQPVSVK.[V]	1xBiotin [K2]	1	1	P61604	P61604 [55-66]	P61604 1xBiotin [K56]	10 kDa heat shock protein, mitochondrial [OS=Homo sapiens]	1	1424.76	3.596	43.5	156.5	52.1	36.9	58.9	241.8	187.3	23	4846.21	3430.84	5484.97	22496.9	17426.9	2142.58				22496.9	10385.8		Not Found	Not Found	Not Found	High	Peak Found	Not Found	High	0.0009289	0.002916	2.48	33.87
[R].SNDPKSQNHPGWLMR.[G]	1xBiotin [K5]	2	1	P06213-1	P06213-1 [567-581]	P06213-1 1xBiotin [K571]	insulin receptor [OS=Homo sapiens]	1	1992.92	3.595	43.5	156.5	40.5	34.5	37.8	249.5	136	101.6	4444.38	3785.61	4148.71	27356.1	14915.1	11145.7				27356.1	8888.88	4204.67	Not Found	Not Found	Not Found	High	Peak Found	Peak Found	High	0.0008826	0.002126	2.59	38.27
[R].KGESGQSWPR.[L]	1xBiotin [K1]	3	3	Q15185	Q15185 [79-88]	Q15185 1xBiotin [K79]	Prostaglandin E synthase 3 [OS=Homo sapiens]	1	1357.63	3.538	60.4	139.6	52.2	29.9	57.9	233.8	120.5	105.8	4767.47	2733.24	5287.3	21367.5	11012.6	9669.68				21367.5	6563.12	3647.84	Not Found	Not Found	Not Found	High	High	Peak Found	High	0.0008826	0.0003783	2.69	31.39
[K].VTKSAQK.[A]	1xBiotin [K3]	4	4	P68104	P68104 [451-457]	P68104 1xBiotin [K453]	Elongation factor 1-alpha 1 [OS=Homo sapiens]	1	987.529	3.521	37	163	68.4	27.4	41.6	183.2	183.1	96.3	26042.6	10416.9	15837.1	69772.8	69715.2	36683	5616.34	2560.72	4113.84	69772.8	41547.9	13838.5	Peak Found	Peak Found	High	High	High	Peak Found	High	0.0009289	0.00733	1.62	18.23
[K].KEDLYLKPIQR.[T]	1xBiotin [K1]	1	1	P13639	P13639 [439-449]	P13639 1xBiotin [K439]	Elongation factor 2 [OS=Homo sapiens]	1	1628.88	3.498	44.5	155.5	68.3	43.5	27.2	176.6	152.1	132.3	5387.52	3432.02	2142.41	13938.1	12005.6	10439.2				13938.1	7154.91	3938.13	Not Found	Not Found	Not Found	High	Peak Found	Peak Found	High	0.0008826	0.001346	2.08	38.42
[R].WEALDNFINRPVKLIIGDR.[E]	1xBiotin [K13]	2	2	AGIA-fabID; EGFR-fabID	AGIA-fabID [491-509]; EGFR-fabID [511-529]	AGIA-fabID 1xBiotin [K503]; EGFR-fabID 1xBiotin [K523]	Heavy Heavy	1	2495.32	3.495	38.3	161.7	76.9	33.5	32.5	141.1	202.4	113.6	5579.45	2428.42	2358.19	10237.5	14681.1	8241.62				10237.5	8749.41	3109.12	Not Found	Not Found	Not Found	High	High	Peak Found	High	0.0008826	8.918e-05	3.09	60.24
[R].HLYTKDIDIHEVR.[I]	1xBiotin [K5]	2	1	Q00839	Q00839 [348-360]	Q00839 1xBiotin [K352]	Heterogeneous nuclear ribonucleoprotein U [OS=Homo sapiens]	1	1864.94	3.491	51.5	148.5	50.8	28.9	59.1	213.8	100.8	146.7	3710.09	2108.27	4313.38	15610.1	7359.59	10708.5				15610.1	4386.06	4039.74	Not Found	Not Found	Not Found	High	Peak Found	Peak Found	High	0.0008826	3.098e-05	4.53	38.33
[R].GPIKFNVWDTAGQEK.[F]	1xBiotin [K4]	1	4	P62826	P62826 [57-71]	P62826 1xBiotin [K60]	GTP-binding nuclear protein RAN [OS=Homo sapiens]	1	1915.94	3.473	44.7	155.3	42.1	23	50	259.7	146.3	79	4363.32	2378.62	5178.19	26903.4	15155.7	8180.03				26903.4	9032.27	3085.88	Not Found	Not Found	Not Found	High	High	High	High	0.0008826	0.0002547	3.8	50.52
[K].AGGTKPKKPVGAAK.[K]	1xBiotin [K7]	1	2	P16403	P16403 [123-136]	P16403 1xBiotin [K129]	Histone H1.2 [OS=Homo sapiens]	1	1535.87	3.408	45.4	154.6	47.6	26.1	43.2	279.5	147.2	56.4	4020.39	2203.32	3647.12	23594.5	12428.5	4765.28				23594.5	7406.95		Not Found	Not Found	Not Found	High	Peak Found	Not Found	High	0.001693	0.0188	2.57	15.66
[K].ILKVIR.[K]	1xBiotin [K3]	3	3	P07900; P08238	P07900 [408-413]; P08238 [400-405]	P07900 1xBiotin [K410]; P08238 1xBiotin [K402]	Heat shock protein HSP 90-alpha [OS=Homo sapiens] Heat shock protein HSP 90-beta [OS=Homo sapiens]	1	967.612	3.405	52	148	64.6	4.4	53.6	220.1	152.6	104.6	41590.1	2841.48	34493.6	141608	98199.2	67326.5	8969.31		8960.05	141608	58523.3	25398.6	Peak Found	Not Found	Peak Found	Peak Found	High	High	High	0.003389	0.05649	2.31	39.18
[K].MQASIEKGGSLPK.[V]	1xBiotin [K7]	2	2	P06748	P06748 [251-263]	P06748 1xBiotin [K257]	Nucleophosmin [OS=Homo sapiens]	1	1571.79	3.374	45.7	154.3	30.4	81.3	38.9	281	131.4	37.1	2107.21	5641.97	2702.92	19505.2	9118.5	2572.25				19505.2	5434.31		Not Found	Not Found	Not Found	High	High	Not Found	High	0.0008826	0.0005232	3.06	37.07
[-G].MQIFVKTLTGK.[T]	1xBiotin [K6]; 1xOxidation [M1]	4	6	P62987	P62987 [1-11]	P62987 1xBiotin [K6]	Ubiquitin-60S ribosomal protein L40 [OS=Homo sapiens]	1	1507.8	3.358	44.9	155.1	61.1	44.4	37.2	179	153.5	124.8	15454.4	11230.3	9399.28	45275.2	38833.7	31565.1	3332.9	2760.67	2441.56	45275.2	23143.6	11907.8	Peak Found	Peak Found	Peak Found	High	High	High	High	0.0008826	0.0002926	3.05	45.87
[K].KNLQYYDISAK.[S]	1xBiotin [K1]	1	2	P62826	P62826 [142-152]	P62826 1xBiotin [K142]	GTP-binding nuclear protein RAN [OS=Homo sapiens]	1	1568.78	3.35	46	154	46.6	27.5	59.4	253.5	156.2	56.8	4310.64	2539.26	5488.28	23430.8	14440.2	5252.75				23430.8	8605.85		Not Found	Not Found	Not Found	High	High	Not Found	High	0.0008826	0.002092	2.08	40.72
[R].KIFVGTK.[G]	1xBiotin [K1]	1	1	P62701	P62701 [128-134]	P62701 1xBiotin [K128]	40S ribosomal protein S4, X isoform [OS=Homo sapiens]	1	1018.58	3.348	46	154	43.9	31.9	55.9	223.3	147.1	97.9	3142.2	2279.54	4000.08	15969.6	10519.6	7005.54				15969.6	6269.29	2642.81	Not Found	Not Found	Not Found	High	Peak Found	Peak Found	High	0.002374	0.03778	2.16	35.64
[R].SGDSEVYQLGDVSQKTTWHR.[I]	1xBiotin [K15]	1	1	Q04837	Q04837 [67-86]	Q04837 1xBiotin [K81]	Single-stranded DNA-binding protein, mitochondrial [OS=Homo sapiens]	1	2519.16	3.334	43.1	156.9	40.4	49.8	67	181.6	223.3	37.8	3395.5	4184.58	5623.54	15249.6	18749.7	3175.56				15249.6	11174.2		Not Found	Not Found	Not Found	High	Peak Found	Not Found	High	0.0008826	0.0001306	3.61	44.69
[R].KFGDPVVQSDMK.[H]	1xBiotin [K1]	2	5	P0DMV8	P0DMV8 [77-88]	P0DMV8 1xBiotin [K77]	heat shock 70 kDa protein 1A [OS=Homo sapiens]	1	1576.75	3.333	49.1	150.9	34.8	19.2	47.3	327.8	106.8	64.1	16913.2	9351.41	23025.4	159464	51974.5	31168	3647.5	2298.79	5981.07	159464	30975	11758	Peak Found	Peak Found	Peak Found	High	High	High	High	0.0008826	2.866e-06	3.63	39.84
[K].YTKDHTVR.[S]	1xBiotin [K3]	1	1	Q13263	Q13263 [186-193]	Q13263 1xBiotin [K188]	Transcription intermediary factor 1-beta [OS=Homo sapiens]	1	1245.6	3.324	46.3	153.7	48.2	27	47.8	231.3	159	86.8	4447.27	2488.8	4416.74	21357.3	14680.1	8016.77				21357.3	8748.81	3024.29	Not Found	Not Found	Not Found	High	Peak Found	Peak Found	High	0.0009289	0.009489	2.2	22.66
[R].KVDWLTEK.[M]	1xBiotin [K1]	5	1	P60842	P60842 [284-291]	P60842 1xBiotin [K284]	Eukaryotic initiation factor 4A-I [OS=Homo sapiens]	1	1244.63	3.319	41.9	158.1	33.6	29.1	78.7	235.1	126.9	96.6	2314.68	2005.19	5418.47	16192.3	8737.25	6654.4				16192.3	5207.1	2510.34	Not Found	Not Found	Not Found	High	Peak Found	Peak Found	High	0.0009289	0.004109	2.64	43.46
[K].KLEDGPKFLK.[S]	1xBiotin [K7]	3	7	P68104	P68104 [386-395]	P68104 1xBiotin [K392]	Elongation factor 1-alpha 1 [OS=Homo sapiens]	2	1400.76	3.275	57.9	142.1	11.3	60.2	67	219.3	147.7	94.6	5375.77	28766.5	31977.4	104740	70514	45164.9		7071.47	8306.44	104740	42023.9	17038.2	Not Found	Peak Found	Peak Found	High	High	High	High	0.0008826	0.0001497	3.72	37.89
[RK].KHEAFESDLAAHQDR.[V]	1xBiotin [K1]	8	3	P12814-1	P12814-1 [436-450]	P12814-1 1xBiotin [K436]	Alpha-actinin-1 [OS=Homo sapiens]	1	1979.9	3.251	47	153	34.2	47.9	53.7	239.4	155.6	69.2	3572.16	5001.74	5614.45	25026.3	16260	7237.83				25026.3	9690.4	2730.44	Not Found	Not Found	Not Found	High	High	Peak Found	High	0.0008826	6.488e-06	4.8	31.28
[K].FSEVLKR.[L]	1xBiotin [K6]	1	2	P12277	P12277 [308-314]	P12277 1xBiotin [K313]	Creatine kinase B-type [OS=Homo sapiens]	1	1104.59	3.24	48.4	151.6	50.3	33.2	37.8	252.6	107.6	118.4	5889.88	3885.84	4422.9	29551.1	12591.4	13854.1				29551.1	7504.06	5226.41	Not Found	Not Found	Not Found	High	High	Peak Found	High	0.0009289	0.01112	2.25	36.32
[K].ATGQKAAPAPK.[A]	1xBiotin [K5]	1	2	P50914	P50914 [183-193]	P50914 1xBiotin [K187]	60S ribosomal protein L14 [OS=Homo sapiens]	1	1265.67	3.23	42.6	157.4	34.1	73.3	36.8	236.9	135.8	83.1	2533.15	5456.03	2734.29	17622.5	10103.9	6185.1				17622.5	6021.57	2333.3	Not Found	Not Found	Not Found	High	High	Peak Found	High	0.0008826	0.0009452	3.08	22.66
[R].GLTSVINQKLK.[D]	1xBiotin [K9]	1	3	P07195	P07195 [300-310]	P07195 1xBiotin [K308]	L-lactate dehydrogenase B chain [OS=Homo sapiens]	1	1426.81	3.192	60.7	139.3	44.9	28.3	48.8	284.5	103.1	90.4	3679.86	2318.25	3993.79	23296.9	8443.95	7399.34				23296.9	5032.3	2791.37	Not Found	Not Found	Not Found	High	High	Peak Found	High	0.0008826	0.001556	2.23	48.03
[R].KLAGILVEMTGK.[T]	1xBiotin [K1]; 1xOxidation [M9]	2	58	AGIA-fabID; EGFR-fabID	AGIA-fabID [409-420]; EGFR-fabID [429-440]	AGIA-fabID 1xBiotin [K409]; EGFR-fabID 1xBiotin [K429]	Heavy Heavy	1	1501.81	3.158	48.1	151.9	74.2	51.8	25.1	114.1	163.6	171.1	1.35205e+06	944190	457785	2.07911e+06	2.98142e+06	3.1172e+06	291582	232104	118914	2.07911e+06	1.77682e+06	1.17595e+06	High	High	High	High	High	High	High	0.0008826	9.13e-07	4.36	43.87
[K].YAKLEER.[T]	1xBiotin [K3]	2	2	O95218-1	O95218-1 [93-99]	O95218-1 1xBiotin [K95]	Zinc finger Ran-binding domain-containing protein 2 [OS=Homo sapiens]	1	1134.56	3.147	48.2	151.8	67.6	45.6	39.6	166.7	143.6	136.8	5412.43	3652.02	3167.99	13340.7	11491.2	10942				13340.7	6848.36	4127.83	Not Found	Not Found	Not Found	High	High	Peak Found	High	0.0009289	0.01037	1.59	31.63
[R].DKPHVNVGTIGHVDHGK.[T]	1xBiotin [K2]	1	1	P49411	P49411 [54-70]	P49411 1xBiotin [K55]	elongation factor Tu, mitochondrial [OS=Homo sapiens]	0	2036.01	3.144	43.8	156.2	45.4	48.5	62.6	196.7	172.9	73.9	4123.09	4411.13	5686.67	17876.1	15715.2	6721				17876.1	9365.7	2535.47	Not Found	Not Found	Not Found	High	Peak Found	Peak Found	High	0.0008826	0.0005499	3.2	32.95
[K].EGVHGGLINKK.[C]	1xBiotin [K10]	1	1	P07737	P07737 [117-127]	P07737 1xBiotin [K126]	profilin-1 [OS=Homo sapiens]	1	1377.73	3.064	47.9	152.1	35.7	65.7	53.8	201.2	170.9	72.7	2768.03	5093.22	4170.7	15605.2	13251.6	5640.6				15605.2	7897.48	2127.89	Not Found	Not Found	Not Found	High	Peak Found	Peak Found	High	0.003241	0.05175	2.46	31.5
[R].ALSTGEKGFGYK.[G]	1xBiotin [K7]	1	2	P62937	P62937 [38-49]	P62937 1xBiotin [K44]	peptidyl-prolyl cis-trans isomerase A [OS=Homo sapiens]	1	1483.72	3.052	49.4	150.6	75.5	37.8	37.2	241	115.3	93.2	29344.7	14678.7	14449.9	93629	44799.7	36195.5	6328.48	3608.35	3753.49	93629	26699.1	13654.6	Peak Found	Peak Found	Peak Found	High	High	Peak Found	High	0.0008826	0.0002675	3.3	38.13
[K].IMKDILEK.[K]	1xBiotin [K3]; 1xOxidation [M2]	2	2	P07900	P07900 [574-581]	P07900 1xBiotin [K576]	Heat shock protein HSP 90-alpha [OS=Homo sapiens]	1	1231.64	3.051	49.4	150.6	64.7	48.6	28.3	180.1	148.2	130.1	5706.72	4283.6	2496.63	15885.3	13068.5	11469.5				15885.3	7788.35	4326.81	Not Found	Not Found	Not Found	High	High	Peak Found	High	0.0009289	0.00647	1.97	38.56
[R].DPNTKR.[S]	1xBiotin [K5]	4	2	P09651-1	P09651-1 [48-53]	P09651-1 1xBiotin [K52]	Heterogeneous nuclear ribonucleoprotein A1 [OS=Homo sapiens]	1	956.462	3.049	42.6	157.4	48.3	31.4	63.8	182.6	178.2	95.7	4277.56	2780.56	5656.63	16181	15795.6	8478.38				16181	9413.64	3198.43	Not Found	Not Found	Not Found	Peak Found	High	Peak Found	High	0.002374	0.03551	1.4	18.69
[K].EFDGKSLVSVTK.[E]	1xBiotin [K5]	3	2	P08238	P08238 [527-538]	P08238 1xBiotin [K531]	Heat shock protein HSP 90-beta [OS=Homo sapiens]	1	1535.78	2.984	61.9	138.1	54.9	32.6	60.4	232.4	122.5	97.2	5296.45	3141.24	5829.25	22420.1	11814.5	9372.1				22420.1	7041	3535.58	Not Found	Not Found	Not Found	High	High	Peak Found	High	0.0008826	0.0004711	2.14	44.09
[K].GQKVGEFSGANK.[E]	1xBiotin [K3]	2	2	P10599-1	P10599-1 [83-94]	P10599-1 1xBiotin [K85]	thioredoxin [OS=Homo sapiens]	1	1447.7	2.974	63.1	136.9	20.9	87.7	47.3	260.7	102.7	80.7	2563.16	10772.9	5818.55	32039.7	12626.7	9912.91		2648.22		32039.7	7525.06	3739.6	Not Found	Peak Found	Not Found	High	High	Peak Found	High	0.0008826	0.0008588	2.72	31.7
[K].AKMQASIEK.[GA]	1xBiotin [K2]	3	1	P06748	P06748 [249-257]	P06748 1xBiotin [K250]	Nucleophosmin [OS=Homo sapiens]	1	1231.62	2.968	52.5	147.5	47.7	20.3	53.3	284.6	133.8	60.4	4876.71	2080.72	5449.33	29111.3	13687.5	6175.85				29111.3	8157.26	2329.81	Not Found	Not Found	Not Found	High	Peak Found	Peak Found	High	0.0009289	0.004948	2.24	30.07
[K].TGLKELPMR.[N]	1xBiotin [K4]; 1xOxidation [M8]	4	2	P00533-1	P00533-1 [130-138]	P00533-1 1xBiotin [K133]	epidermal growth factor receptor [OS=Homo sapiens]	1	1286.66	2.967	50.4	149.6	46.9	28.6	38.2	291	113.5	81.7	3933.39	2397.51	3206.01	24397.3	9511.73	6850.9				24397.3	5668.66	2584.47	Not Found	Not Found	Not Found	High	Peak Found	Peak Found	High	0.0009289	0.01409	2.14	36.98
[K].AKKPAAATVTK.[K]	1xBiotin [K2]	1	1	P16403	P16403 [158-168]	P16403 1xBiotin [K159]	Histone H1.2 [OS=Homo sapiens]	1	1311.75	2.961	50.5	149.5	54.3	47.4	42.1	241.9	140.5	73.8	4084.67	3570.29	3166.62	18204.8	10570.3	5549.25				18204.8	6299.56		Not Found	Not Found	Not Found	High	Peak Found	Not Found	High	0.0009289	0.01399	2.43	20.43
[R].LIGDAAKNQVALNPQNTVFDAK.[R]	1xBiotin [K7]	2	10	P0DMV8	P0DMV8 [50-71]	P0DMV8 1xBiotin [K56]	heat shock 70 kDa protein 1A [OS=Homo sapiens]	1	2553.31	2.952	50.6	149.4	54	45.1	35.2	240.4	133	92.3	45214.3	37730.3	29503.4	201325	111376	77283	9750.91	9274.98	7663.8	201325	66376.5	29154.7	High	High	Peak Found	High	High	High	High	0.0008826	5.348e-07	5.39	48.76
[K].VIATKVLGTVK.[W]	1xBiotin [K5]	4	3	P16989-1; P67809	P16989-1 [86-96]; P67809 [54-64]	P16989-1 1xBiotin [K90]; P67809 1xBiotin [K58]	Y-box-binding protein 3 [OS=Homo sapiens] Nuclease-sensitive element-binding protein 1 [OS=Homo sapiens]	1	1354.81	2.939	50.8	149.2	35.8	40.2	56.5	244.5	105.2	117.9	2840.59	3186.96	4480.19	19401.1	8348.83	9355.77				19401.1	4975.61	3529.42	Not Found	Not Found	Not Found	High	High	Peak Found	High	0.0009289	0.01272	2.46	44
[K].KEMQPTHPIR.[L]	1xBiotin [K1]; 1xOxidation [M3]	5	2	P63104-1; P27348	P63104-1 [158-167]; P27348 [158-167]	P63104-1 1xBiotin [K158]; P27348 1xBiotin [K158]	14-3-3 protein zeta/delta [OS=Homo sapiens] 14-3-3 protein theta [OS=Homo sapiens]	1	1478.72	2.938	38.5	161.5	39.7	43	62.5	180.6	183.8	90.3	3377.93	3663	5324.09	15377.4	15642.8	7690.5				15377.4	9322.58	2901.21	Not Found	Not Found	Not Found	High	High	Peak Found	High	0.002374	0.03618	1.8	21.48
[R].KTVTAMDVVYALK.[R]	1xBiotin [K1]; 1xOxidation [M6]	1	3	P62805	P62805 [80-92]	P62805 1xBiotin [K80]	histone H4 [OS=Homo sapiens]	1	1680.87	2.924	56.6	143.4	61.5	27.6	50.3	252.4	127.5	80.7	5705.67	2562.4	4666.38	23420.1	11827.7	7491.24				23420.1	7048.92	2826.04	Not Found	Not Found	Not Found	High	High	Peak Found	High	0.0008826	7.614e-05	3.51	47.87
[K].LGGKLTGTANK.[A]	1xBiotin [K4]	1	1	P09874	P09874 [415-425]	P09874 1xBiotin [K418]	Poly [ADP-ribose] polymerase 1 [OS=Homo sapiens]	1	1285.69	2.911	51.1	148.9	73.1	29.6	43.4	276.8	50.7	126.4	5035.91	2037.23	2991.07	19068.2	3495.15	8707.64				19068.2		3284.92	Not Found	Not Found	Not Found	High	Not Found	Peak Found	High	0.002374	0.03919	1.99	31.8
[R].IASHSHVKGLGLDESGLAK.[Q]	1xBiotin [K8]	2	2	Q9Y265	Q9Y265 [15-33]	Q9Y265 1xBiotin [K22]	RuvB-like 1 [OS=Homo sapiens]	1	2145.11	2.874	70.7	129.3	37.6	63	70.5	205.6	115.4	107.9	2199.22	3691.13	4128.24	12041.2	6755.34	6321.36				12041.2	4025.95	2384.71	Not Found	Not Found	Not Found	High	High	Peak Found	High	0.0008826	0.00188	3.11	36.16
[R].YVQKGEYR.[T]	1xBiotin [K4]	17	2	P16070	P16070 [155-162]	P16070 1xBiotin [K158]	CD44 antigen [OS=Homo sapiens]	1	1268.61	2.846	51.4	148.6	57.1	39.4	62.9	179.1	165.3	96.2	5254.12	3620.66	5788.05	16474.3	15203.5	8844.65				16474.3	9060.78	3336.6	Not Found	Not Found	Not Found	High	High	Peak Found	High	0.0009289	0.003714	2.24	29.97
[K].LVLVGDGGTGKTTFVK.[R]	1xBiotin [K11]	1	2	P62826	P62826 [13-28]	P62826 1xBiotin [K23]	GTP-binding nuclear protein RAN [OS=Homo sapiens]	1	1817.98	2.817	68.2	131.8	47.4	31.4	67.4	273.8	91.6	88.4	3426.04	2266.6	4870.65	19785.6	6616.6	6385.98				19785.6	3943.26	2409.08	Not Found	Not Found	Not Found	High	High	Peak Found	High	0.0008826	0.0001231	3.52	46.64
[-].MATKAVCVLK.[G]	1xBiotin [K4]; 1xCarbamidomethyl [C7]; 1xMet-loss+Acetyl [N-Term]	1	1	P00441	P00441 [1-10]	P00441 1xBiotin [K4]; 1xMet-loss+Acetyl [N-Term]	Superoxide dismutase [Cu-Zn] [OS=Homo sapiens]	1	1257.67	2.8	31	169	28.8	82.9	32.9	232.2	179.6	43.7	2013.32	5805.18	2303.16	16254.9	12571.6	3057.17				16254.9	7492.25		Not Found	Not Found	Not Found	High	Peak Found	Not Found	High	0.001298	0.01719	1.56	45.58
[R].ILGPGLNKAGK.[F]	1xBiotin [K11]	1	1	P62906	P62906 [123-133]	P62906 1xBiotin [K133]	60S ribosomal protein L10A [OS=Homo sapiens]	1	1293.73	2.782	52.9	147.1	39.9	44.9	60.1	228	125	102	2267.54	2553.52	3413.81	12957.3	7104.49	5798.29				12957.3	4234.03		Not Found	Not Found	Not Found	High	Peak Found	Not Found	High	0.003389	0.06304	2.44	37.77
[R].RPAVKQFHDSK.[I]	1xBiotin [K5]	1	1	Q02543	Q02543 [139-149]	Q02543 1xBiotin [K143]	60S ribosomal protein L18a [OS=Homo sapiens]	1	1538.79	2.777	53	147	49.4	80.8	35.8	195.4	137.2	101.5	3585.17	5861.7	2595.75	14179.5	9955.91	7362.8				14179.5	5933.38	2777.58	Not Found	Not Found	Not Found	High	Peak Found	Peak Found	High	0.0009289	0.007131	2.31	24.41
[R].TPKIVSGK.[DV]	1xBiotin [K3]	5	1	P00338-1	P00338-1 [74-81]	P00338-1 1xBiotin [K76]	L-lactate dehydrogenase A chain [OS=Homo sapiens]	1	1055.59	2.776	53	147	48.6	36.9	68	228.2	134.8	83.6	5308.38	4031.22	7435.38	24946.1	14733.6	9143.34			1931.41	24946.1	8780.71	3449.28	Not Found	Not Found	Peak Found	High	Peak Found	Peak Found	High	0.0009289	0.01085	2.25	28.65
[K].DTYVMKIK.[V]	1xBiotin [K6]; 1xOxidation [M5]	2	1	Q9HC56	Q9HC56 [216-223]	Q9HC56 1xBiotin [K221]	Protocadherin-9 [OS=Homo sapiens]	1	1239.61	2.771	51.1	148.9	67.9	51.8	52.7	86	188.1	153.6	5669.6	4321.75	4399.03	7177.8	15708.8	12827.1				7177.8	9361.92	4838.96	Not Found	Not Found	Not Found	Peak Found	High	Peak Found	High	0.003389	0.05427	1.63	35.92
[R].QTVAVGVIKAVDKK.[A]	1xBiotin [K9]	3	1	P68104	P68104 [431-444]	P68104 1xBiotin [K439]	Elongation factor 1-alpha 1 [OS=Homo sapiens]	2	1681.97	2.759	47.4	152.6	75.4	41.4	55.8	179.7	207.9	39.8	4393.26	2413.22	3254.32	10477.1	12119.9	2319.92				10477.1	7223.02		Not Found	Not Found	Not Found	High	Peak Found	Not Found	High	0.0009289	0.01346	2.91	39.87
[K].GATPGKALVATPGK.[K]	1xBiotin [K6]	1	2	P19338	P19338 [111-124]	P19338 1xBiotin [K116]	Nucleolin [OS=Homo sapiens]	1	1493.81	2.752	53.3	146.7	56.8	38.2	58.6	226.2	156.4	63.7	5032.74	3384.84	5186.7	20031.8	13848.4	5642.34				20031.8	8253.14	2128.55	Not Found	Not Found	Not Found	High	High	Peak Found	High	0.0008826	0.0002487	2.83	35.96
[K].IKGEHPGLSIGDVAK.[K]	1xBiotin [K2]	2	1	P09429	P09429 [113-127]	P09429 1xBiotin [K114]	High mobility group protein B1 [OS=Homo sapiens]	1	1746.92	2.745	53.4	146.6	54.4	37	62.9	211.3	149.4	85.1	3183.34	2162.3	3677.03	12361.7	8738.78	4978.75				12361.7	5208.01		Not Found	Not Found	Not Found	High	Peak Found	Not Found	High	0.0009289	0.01154	2.4	37.14
[K].KLAPEYEK.[A]	1xBiotin [K1]	1	1	P13667	P13667 [211-218]	P13667 1xBiotin [K211]	Protein disulfide-isomerase A4 [OS=Homo sapiens]	1	1203.61	2.721	53.8	146.2	43	61.2	32.6	257.8	117	88.5	3412.71	4857.85	2585.21	20460.9	9284.83	7023.97				20460.9	5533.44	2649.76	Not Found	Not Found	Not Found	High	Peak Found	Peak Found	High	0.0009289	0.007025	2.32	31.14
[R].QTVAVGVIKAVDK.[K]	1xBiotin [K9]	3	2	P68104	P68104 [431-443]	P68104 1xBiotin [K439]	Elongation factor 1-alpha 1 [OS=Homo sapiens]	1	1553.87	2.711	53.9	146.1	50.3	49.4	53.4	204.7	106	136.3	5213.47	5118.33	5534.79	21228.6	10997	14132.2				21228.6	6553.83	5331.31	Not Found	Not Found	Not Found	High	High	Peak Found	High	0.0008826	0.000222	3.24	43.86
[R].INVYYNEATGNKYVPR.[A]	1xBiotin [K12]	1	5	Q9BVA1	Q9BVA1 [47-62]	Q9BVA1 1xBiotin [K58]	Tubulin beta-2B chain [OS=Homo sapiens]	1	2127.03	2.708	53.9	146.1	47.7	48.1	92.3	253.8	130.3	27.7	5113.96	5159.58	9894.02	27206	13971.4	2967.45			2570.07	27206	8326.45		High	Not Found	High	High	High	Not Found	High	0.0008826	6.836e-06	4.46	42.98
[R].ISKEEAMR.[W]	1xBiotin [K3]; 1xOxidation [M7]	2	1	P62913	P62913 [157-164]	P62913 1xBiotin [K159]	60S ribosomal protein L11 [OS=Homo sapiens]	1	1205.57	2.708	53.9	146.1	58.8	42.6	60.3	159.3	162.4	116.5	3738.42	2705.73	3831.27	10123.1	10319.1	7399.87				10123.1	6149.81	2791.57	Not Found	Not Found	Not Found	High	Peak Found	Peak Found	High	0.003241	0.05115	1.35	26.04
[K].GKNVLINK.[D]	1xBiotin [K2]	1	2	P27797	P27797 [152-159]	P27797 1xBiotin [K153]	Calreticulin [OS=Homo sapiens]	1	1111.63	2.664	44.2	155.8	37.7	94	38	250.5	134.2	45.6	2154.77	5369.77	2170.84	14306.6	7663.07	2607.18				14306.6	4566.92		Not Found	Not Found	Not Found	High	Peak Found	Not Found	High	0.00223	0.02658	2.22	34.15
[K].GIEKNLGIGK.[V]	1xBiotin [K4]	2	1	P40926	P40926 [298-307]	P40926 1xBiotin [K301]	Malate dehydrogenase, mitochondrial [OS=Homo sapiens]	1	1254.69	2.657	54.7	145.3	67.9	27.5	53.2	240	141.3	70	5369.19	2176.02	4206.47	18979.2	11175	5532.18				18979.2	6659.94		Not Found	Not Found	Not Found	High	Peak Found	Not Found	High	0.0009289	0.00813	2.6	39.55
[K].KSADTLWGIQK.[E]	1xBiotin [K1]	3	1	P00338-1	P00338-1 [318-328]	P00338-1 1xBiotin [K318]	L-lactate dehydrogenase A chain [OS=Homo sapiens]	1	1472.76	2.636	56.8	143.2	36.5	38.4	84.4	247.8	96.1	96.8	2476.26	2608.27	5729.61	16828.5	6526.55	6575.55				16828.5	3889.6	2480.6	Not Found	Not Found	Not Found	High	Peak Found	Peak Found	High	0.0008826	3.345e-05	2.86	44.02
[K].GVITVKDGK.[T]	1xBiotin [K6]	1	1	P10809	P10809 [197-205]	P10809 1xBiotin [K202]	60 kDa heat shock protein, mitochondrial [OS=Homo sapiens]	1	1142.62	2.602	55.5	144.5	53.6	55.4	72	225.3	144.1	49.7	3501.2	3619.81	4703.96	14729.1	9417.51	3245.28				14729.1	5612.51		Not Found	Not Found	Not Found	High	Peak Found	Not Found	High	0.002374	0.0333	1.99	33.66
[K].IKIIAPPER.[K]	1xBiotin [K2]	8	8	P60709	P60709 [327-335]	P60709 1xBiotin [K328]	Actin, cytoplasmic 1 [OS=Homo sapiens]	1	1262.73	2.587	59	141	57.5	40.5	57.3	202.8	137	104.9	66046.3	46542	65832.6	232829	157248	120421	14243.5	11441.1	17100.7	232829	93714.3	45428.3	High	Peak Found	High	High	High	High	High	0.0008826	0.002615	2.82	39.89
[K].DVNAAIATIKTK.[R]	1xBiotin [K10]	8	3	P68363	P68363 [327-338]	P68363 1xBiotin [K336]	Tubulin alpha-1B chain [OS=Homo sapiens]	1	1470.8	2.583	65.9	134.1	64.7	39.8	68.2	176	131.8	119.5	8865.39	5445.28	9334.63	24108.2	18050.4	16361.9	1911.91		2424.76	24108.2	10757.4	6172.45	Peak Found	Not Found	Peak Found	High	Peak Found	High	High	0.0008826	0.0006212	2.83	45.08
[K].ANEVISKLYAVHQEGNK.[N]	1xBiotin [K7]	3	1	P50990	P50990 [460-476]	P50990 1xBiotin [K466]	T-complex protein 1 subunit theta [OS=Homo sapiens]	1	2126.07	2.574	54.3	145.7	109.1	42.5	45.2	172.2	121.4	109.5	5231.13	2040.21	2169.29	8260.53	5823.44	5251.82				8260.53	3470.57	1981.22	Not Found	Not Found	Not Found	High	Peak Found	Peak Found	High	0.0009289	0.008136	2.91	45.22
[R].YIGIVKQAGLER.[M]	1xBiotin [K6]	1	1	P52597	P52597 [219-230]	P52597 1xBiotin [K224]	Heterogeneous nuclear ribonucleoprotein F [OS=Homo sapiens]	1	1572.86	2.572	77.3	122.7	39.2	69.8	64.3	224	100.7	102	2172.43	3873.65	3565.37	12428.3	5587.44	5656.65				12428.3	3329.92		Not Found	Not Found	Not Found	High	Peak Found	Not Found	High	0.0009289	0.006279	2.73	44.3
[-G].MQIFVKTLTGK.[T]	1xBiotin [K6]	4	7	P62987	P62987 [1-11]	P62987 1xBiotin [K6]	Ubiquitin-60S ribosomal protein L40 [OS=Homo sapiens]	1	1491.81	2.569	73.4	126.6	90.9	29	58.5	233.4	100.9	87.3	32889.8	10512.4	21177.9	84478.8	36536	31613.9	7093.02	2584.18	5501.16	84478.8	21774.2	11926.2	High	Peak Found	High	High	High	High	High	0.0008826	0.0001128	3.35	50.84
[K].IISKIENHEGVR.[R]	1xBiotin [K4]	3	1	P14618	P14618 [267-278]	P14618 1xBiotin [K270]	Pyruvate kinase PKM [OS=Homo sapiens]	1	1620.85	2.564	56.1	143.9	46.8	52.5	52.5	208.2	134.6	105.4	5058.76	5679.06	5681.55	22530.5	14560.3	11407.7				22530.5	8677.42	4303.49	Not Found	Not Found	Not Found	Peak Found	High	Peak Found	High	0.002374	0.04184	1.75	33.73
[R].KLAGILVEMTGK.[T]	1xBiotin [K1]	2	31	AGIA-fabID; EGFR-fabID	AGIA-fabID [409-420]; EGFR-fabID [429-440]	AGIA-fabID 1xBiotin [K409]; EGFR-fabID 1xBiotin [K429]	Heavy Heavy	1	1485.82	2.561	61.3	138.7	58.8	40.1	73.8	189	105	133.2	614149	418719	770353	1.97285e+06	1.09611e+06	1.38986e+06	132447	102931	200107	1.97285e+06	653246	524319	High	High	High	High	High	High	High	0.0008826	3.984e-07	4.23	53.53
[K].LNGKVIDPK.[R]	1xBiotin [K4]	4	1	Q14103	Q14103 [162-170]	Q14103 1xBiotin [K165]	heterogeneous nuclear ribonucleoprotein D0 [OS=Homo sapiens]	1	1209.67	2.504	51.2	148.8	49.8	66.1	50	164.1	145.3	124.7	3317.28	4406.26	3333.33	10934.9	9678.33	8307.87				10934.9	5767.95	3134.11	Not Found	Not Found	Not Found	High	Peak Found	Peak Found	High	0.002658	0.04446	3.21	34.08
[K].LLSISGKR.[S]	1xBiotin [K7]	3	1	P06748	P06748 [135-142]	P06748 1xBiotin [K141]	Nucleophosmin [OS=Homo sapiens]	1	1099.63	2.502	57.1	142.9	72.7	41	56.3	192.1	140.8	97.1	33318.2	18768.3	25794.2	88013.2	64532.1	44472.7	7185.39	4613.68	6700.31	88013.2	38458.9	16777.1	Peak Found	Peak Found	Peak Found	High	Peak Found	Peak Found	High	0.002374	0.03205	2	38.22
[K].VVKQASEGPLK.[G]	1xBiotin [K3]	2	3	P04406-1	P04406-1 [261-271]	P04406-1 1xBiotin [K263]	glyceraldehyde-3-phosphate dehydrogenase [OS=Homo sapiens]	1	1381.75	2.495	57.2	142.8	45.6	59.6	56.2	200.8	140.2	97.5	17029.1	22274.2	20999.1	75026.6	52382.5	36415.8	3672.5	5475.52	5454.73	75026.6	31218.2	13737.7	Peak Found	Peak Found	Peak Found	High	High	Peak Found	High	0.0008826	0.0006167	2.7	31.36
[R].DNSTMGYMAAKK.[H]	1xBiotin [K11]; 2xOxidation [M5; M8]	2	3	P07900	P07900 [621-632]	P07900 1xBiotin [K631]	Heat shock protein HSP 90-alpha [OS=Homo sapiens]	1	1574.66	2.49	57.3	142.7	48.5	58.3	69.5	145.1	150.4	128.1	3363.89	4041.1	4820.37	10063.3	10430.3	8886.03				10063.3	6216.08	3352.22	Not Found	Not Found	Not Found	High	High	Peak Found	High	0.001693	0.01985	1.85	26.64
[K].VKEDPDGEHAR.[R]	1xBiotin [K2]	2	1	P52272	P52272 [144-154]	P52272 1xBiotin [K145]	Heterogeneous nuclear ribonucleoprotein M [OS=Homo sapiens]	1	1478.67	2.468	61.7	138.3	43	49.3	61.8	229.1	110.6	106.2	2230.03	2556.1	3202.9	11872.5	5732.77	5504.64				11872.5	3416.53		Not Found	Not Found	Not Found	High	Peak Found	Not Found	High	0.0009289	0.003382	2.45	20.63
[R].SGKYDLDFK.[S]	1xBiotin [K3]	2	5	P06733-1	P06733-1 [254-262]	P06733-1 1xBiotin [K256]	alpha-enolase [OS=Homo sapiens]	1	1298.61	2.466	57.7	142.3	71.9	44.4	50.3	216.7	124	92.6	20903.9	12908.5	14612.9	62981.3	36032.8	26918.4	4508.13	3173.21	3795.86	62981.3	21474.3	10154.9	High	Peak Found	Peak Found	High	High	High	High	0.0008826	0.001311	2.5	43
[K].AAGAGKVTK.[S]	1xBiotin [K6]	3	5	P68104	P68104 [445-453]	P68104 1xBiotin [K450]	Elongation factor 1-alpha 1 [OS=Homo sapiens]	1	1028.56	2.442	58.1	141.9	66.5	51.6	58.6	162.3	143	118.1	47714.9	37060	42039.5	116543	102644	84771.4	10290.2	9110.21	10920.2	116543	61172.6	31979.7	Peak Found	High	High	High	High	High	High	0.0008826	0.001626	2.54	21.94
[K].KAATALK.[D]	1xBiotin [K1]	5	1	Q15084-1	Q15084-1 [67-73]	Q15084-1 1xBiotin [K67]	Protein disulfide-isomerase A6 [OS=Homo sapiens]	1	928.528	2.427	48	152	81.8	51.2	43.8	198.6	162	62.5	4751.37	2971.36	2542.68	11532.3	9408.79	3631.06				11532.3	5607.31		Not Found	Not Found	Not Found	High	Peak Found	Not Found	High	0.002374	0.03274	1.79	25.42
[R].TTTGNKVFGALK.[G]	1xBiotin [K6]	1	2	P46777	P46777 [153-164]	P46777 1xBiotin [K158]	60S ribosomal protein L5 [OS=Homo sapiens]	1	1462.77	2.418	67.3	132.7	63.7	40.9	77	194.1	125.5	98.8	4480.7	2872.4	5410.84	13644.8	8825.21	6945.49				13644.8	5259.52	2620.16	Not Found	Not Found	Not Found	High	High	Peak Found	High	0.0008826	0.00145	2.64	43
[K].KQAGPASVPLR.[T]	1xBiotin [K1]	1	3	P30101	P30101 [130-140]	P30101 1xBiotin [K130]	Protein disulfide-isomerase A3 [OS=Homo sapiens]	1	1349.74	2.418	58.5	141.5	51.7	54.7	38.4	242.4	87.7	125.1	5153.69	5451.16	3827.11	24150.6	8736.93	12459.1				24150.6	5206.91	4700.14	Not Found	Not Found	Not Found	High	High	Peak Found	High	0.0008826	0.001183	1.59	34.14
[R].EDSQRPGAHLTVKK.[I]	1xBiotin [K13]	4	5	P09651-1	P09651-1 [93-106]	P09651-1 1xBiotin [K105]	Heterogeneous nuclear ribonucleoprotein A1 [OS=Homo sapiens]	1	1791.92	2.413	70.7	129.3	72	67.3	43.3	173.6	120.5	123.3	24295.3	22732	14626.3	58619.1	40692.2	41618.1	5239.52	5588.06	3799.33	58619.1	24251.1	15700.3	High	Peak Found	Peak Found	High	High	High	High	0.0009289	0.003052	2.65	26.38
[K].AKGLVPEDDTK.[E]	1xBiotin [K2]	2	1	Q15459	Q15459 [532-542]	Q15459 1xBiotin [K533]	splicing factor 3A subunit 1 [OS=Homo sapiens]	1	1398.69	2.41	58.6	141.4	78.1	38.5	61.2	147.6	148.5	126.2	4413.77	2178.51	3461.17	8342.82	8392.75	7132.11				8342.82	5001.78	2690.56	Not Found	Not Found	Not Found	High	Peak Found	Peak Found	High	0.001298	0.01725	2.23	34.14
[R].KFVADGIFK.[A]	1xBiotin [K1]	2	1	P23396-1	P23396-1 [10-18]	P23396-1 1xBiotin [K10]	40S ribosomal protein S3 [OS=Homo sapiens]	1	1250.66	2.41	58.7	141.3	47.9	91.8	46.4	185.5	115.3	113.2	2255.03	4323.32	2185.32	8739.21	5433.83	5334.22				8739.21	3238.37		Not Found	Not Found	Not Found	High	Peak Found	Not Found	High	0.0008826	0.0005284	1.93	46.96
[K].TFNLEKQNHTPR.[K]	1xBiotin [K6]	1	1	Q15233	Q15233 [6-17]	Q15233 1xBiotin [K11]	Non-POU domain-containing octamer-binding protein [OS=Homo sapiens]	1	1710.84	2.408	64.1	135.9	53.3	59.2	42.3	230.3	101.8	113.1	5310.13	5895.22	4208.71	22936.1	10134.6	11263.7				22936.1	6039.84	4249.19	Not Found	Not Found	Not Found	High	Peak Found	Peak Found	High	0.0008826	0.002413	2.21	34.18
[R].GAFGKPQGTVAR.[V]	1xBiotin [K5]	2	1	P27635	P27635 [117-128]	P27635 1xBiotin [K121]	60S ribosomal protein L10 [OS=Homo sapiens]	0	1414.73	2.406	58.7	141.3	49.6	49.3	79.8	220.6	81.3	119.4	2448.36	2432.19	3935.52	10879.6	4008.83	5889.77				10879.6		2221.89	Not Found	Not Found	Not Found	High	Not Found	Peak Found	High	0.00223	0.02444	1.63	34.94
[R].GTGIVSAPVPKK.[L]	1xBiotin [K11]	1	1	P15880	P15880 [201-212]	P15880 1xBiotin [K211]	40S ribosomal protein S2 [OS=Homo sapiens]	1	1379.77	2.392	59	141	56.9	40.6	72.5	219.4	136.2	74.5	2989.75	2133.47	3806.65	11523.2	7152.54	3913.11				11523.2	4262.67		Not Found	Not Found	Not Found	High	Peak Found	Not Found	High	0.0009289	0.01009	2.3	35.49
[K].VEAKFINYVK.[N]	1xBiotin [K4]	2	3	P06748	P06748 [264-273]	P06748 1xBiotin [K267]	Nucleophosmin [OS=Homo sapiens]	1	1436.76	2.386	59.1	140.9	67.4	50.3	47.6	225	120	89.7	15853.9	11836.7	11190.9	52932.6	28238.7	21108.9	3419.06	2909.73	2906.95	52932.6	16829.3	7963.24	Peak Found	Peak Found	Peak Found	High	High	Peak Found	High	0.0008826	0.0002131	3.08	46.1
[K].YGKDATNVGDEGGFAPNILENK.[E]	1xBiotin [K3]	2	2	P06733-1	P06733-1 [200-221]	P06733-1 1xBiotin [K202]	alpha-enolase [OS=Homo sapiens]	1	2535.18	2.367	59.4	140.6	50.4	40.8	70.1	268.7	119.4	50.6	3663.69	2961.16	5091.09	19518.4	8672.39	3676.42				19518.4	5168.45		Not Found	Not Found	Not Found	High	High	Not Found	High	0.0008826	0.001073	3.25	47.72
[K].VTLDWAKPK.[G]	1xBiotin [K7]	1	1	P19338	P19338 [640-648]	P19338 1xBiotin [K646]	Nucleolin [OS=Homo sapiens]	0	1283.68	2.359	59.5	140.5	35.4	61.6	91.4	216.1	145.4	50.1	2115.03	3682.45	5457.76	12908.4	8688.26	2992.3				12908.4	5177.9		Not Found	Not Found	Not Found	High	Peak Found	Not Found	High	0.0009289	0.00345	2.27	45.06
[K].KPALVAK.[S]	1xBiotin [K1]	5	1	P29692	P29692 [189-195]	P29692 1xBiotin [K189]	Elongation factor 1-delta [OS=Homo sapiens]	0	952.565	2.349	59.7	140.3	56	35.4	73.4	238.8	131.5	64.8	3505.02	2213.06	4595.59	14945.3	8231.74	4056.41				14945.3	4905.83		Not Found	Not Found	Not Found	High	Peak Found	Not Found	High	0.00223	0.03034	1.74	31.52
[R].LAADVGKAGAER.[E]	1xBiotin [K7]	1	1	P05141	P05141 [141-152]	P05141 1xBiotin [K147]	ADP/ATP translocase 2 [OS=Homo sapiens]	1	1383.7	2.341	59	141	47.5	58.9	81.4	190.5	140.8	80.9	3428.77	4252.14	5875.26	13754.7	10166	5843.46				13754.7	6058.6	2204.42	Not Found	Not Found	Not Found	High	Peak Found	Peak Found	High	0.0008826	0.0003808	2.56	31.15
[K].APAQKAPAPK.[A]	1xBiotin [K5]	1	1	P50914	P50914 [200-209]	P50914 1xBiotin [K204]	60S ribosomal protein L14 [OS=Homo sapiens]	1	1204.65	2.336	60	140	57.7	30.8	58.9	247.2	134.8	70.7	5504.86	2934.96	5623.33	23590.3	12860	6746.97				23590.3	7664.09	2545.27	Not Found	Not Found	Not Found	High	Peak Found	Peak Found	High	0.0008826	0.0009423	2.86	23.07
[K].LKSDTAAAAVR.[Q]	1xBiotin [K2]	2	1	P22314	P22314 [527-537]	P22314 1xBiotin [K528]	Ubiquitin-like modifier-activating enzyme 1 [OS=Homo sapiens]	1	1328.7	2.331	60	140	37.4	82	57.7	219.1	134.6	69.2	2625.19	5747.59	4048.27	15367	9435.47	4849.1				15367	5623.21		Not Found	Not Found	Not Found	High	Peak Found	Not Found	High	0.0009289	0.00314	1.46	29.93
[R].GGKNSTWSGESK.[T]	1xBiotin [K3]	1	1	P19338	P19338 [475-486]	P19338 1xBiotin [K477]	Nucleolin [OS=Homo sapiens]	1	1463.66	2.307	60.5	139.5	51.9	37.8	62.9	250.7	119.8	76.9	3852.9	2802.27	4668.05	18604.3	8887.91	5708.73				18604.3	5296.88		Not Found	Not Found	Not Found	High	Peak Found	Not Found	High	0.0009289	0.009692	2.37	28.67
[K].KSDVEAIFSK.[Y]	1xBiotin [K1]	6	2	P07910-1	P07910-1 [30-39]	P07910-1 1xBiotin [K30]	Heterogeneous nuclear ribonucleoproteins C1/C2 [OS=Homo sapiens]	1	1349.68	2.301	61.8	138.2	50.9	54.1	74.7	182.3	121	117	3932.78	4187.1	5778.46	14097.1	9356.12	9048.63				14097.1	5575.92	3413.56	Not Found	Not Found	Not Found	High	High	Peak Found	High	0.0008826	0.000658	2.5	43.48
[K].TLGDFAAEYAKSNR.[S]	1xBiotin [K11]	1	1	P09874	P09874 [109-122]	P09874 1xBiotin [K119]	Poly [ADP-ribose] polymerase 1 [OS=Homo sapiens]	1	1768.83	2.289	59.3	140.7	49.8	112.7	49	158.1	112.2	118.3	2194.51	4967.28	2160.84	6967.7	4946.04	5212.89				6967.7			Not Found	Not Found	Not Found	High	Not Found	Not Found	High	0.0008826	0.0002415	3.31	44.91
[R].SGYYKVLGK.[G]	1xBiotin [K5]	1	1	P46776	P46776 [106-114]	P46776 1xBiotin [K110]	60S ribosomal protein L27a [OS=Homo sapiens]	1	1240.64	2.262	61.3	138.7	60.1	34.7	64.6	241.3	136	63.3	4075.83	2352.17	4375.86	16348.7	9218.83	4288.34				16348.7	5494.1		Not Found	Not Found	Not Found	High	Peak Found	Not Found	High	0.0008826	0.001466	2.35	39.3
[K].HIKTLR.[D]	1xBiotin [K3]	2	2	AGIA-fabID; EGFR-fabID	AGIA-fabID [265-270]; EGFR-fabID [285-290]	AGIA-fabID 1xBiotin [K267]; EGFR-fabID 1xBiotin [K287]	Heavy Heavy	1	993.566	2.26	21.9	178.1	19.8	120.5	14.2	161.3	272.2	12	5723.53	34741.3	4092.29	46509.1	78519.5	3462.12		8540.21		46509.1	46794.9		Not Found	Peak Found	Not Found	High	High	Not Found	High	0.003389	0.06307	1.55	26.79
[K].EKNLLHVTDTGVGMTR.[E]	1xBiotin [K2]; 1xOxidation [M14]	1	2	P14625	P14625 [141-156]	P14625 1xBiotin [K142]	Endoplasmin [OS=Homo sapiens]	1	2012.99	2.251	57.4	142.6	67.3	51.3	80	180	167.4	54	4941	3768.82	5871.75	13218.9	12288.4	3965.28				13218.9	7323.48		Not Found	Not Found	Not Found	High	High	Not Found	High	0.001693	0.01988	2.48	39.82
[K].KIFVGGLSPDTPEEK.[I]	1xBiotin [K1]	4	3	Q14103	Q14103 [183-197]	Q14103 1xBiotin [K183]	heterogeneous nuclear ribonucleoprotein D0 [OS=Homo sapiens]	1	1842.93	2.249	61.6	138.4	65	70.3	42	221.9	146.3	54.5	4625.01	5000.38	2983.73	15782.4	10401.2	3875.63				15782.4	6198.78		Not Found	Not Found	Not Found	High	High	Not Found	High	0.0008826	0.001932	3.25	44.75
[K].TKIISNR.[G]	1xBiotin [K2]	3	9	P00533-1	P00533-1 [488-494]	P00533-1 1xBiotin [K489]	epidermal growth factor receptor [OS=Homo sapiens]	1	1057.58	2.239	53.5	146.5	69.2	53.3	54.6	118.7	154.9	149.3	180772	139297	142668	310259	404782	390310	38985.2	34242.5	37059.5	310259	241236	147243	Peak Found	High	High	High	High	High	High	0.0009289	0.004545	1.78	29.19
[K].KAEVEGK.[D]	1xBiotin [K1]	2	2	Q00839	Q00839 [620-626]	Q00839 1xBiotin [K620]	Heterogeneous nuclear ribonucleoprotein U [OS=Homo sapiens]	1	986.498	2.239	61.8	138.2	55.8	60.3	65.7	179.8	135.1	103.3	4778.45	5165.18	5622.67	15388.2	11563.5	8840.78				15388.2	6891.42	3335.15	Not Found	Not Found	Not Found	High	High	Peak Found	High	0.0009289	0.003239	1.82	20.54
[K].STGGKAPR.[K]	1xBiotin [K5]	5	2	P84243	P84243 [11-18]	P84243 1xBiotin [K15]	histone H3.3 [OS=Homo sapiens]	1	999.504	2.235	61.8	138.2	58.1	45.8	82.1	186.5	129.9	97.4	3948.87	3111.31	5577.17	12668.3	8824.84	6615.77				12668.3	5259.3	2495.77	Not Found	Not Found	Not Found	High	High	Peak Found	High	0.00223	0.02994	1.08	19.04
[R].KGHAVGDIPGVR.[F]	1xBiotin [K1]	1	1	P62266	P62266 [108-119]	P62266 1xBiotin [K108]	40S ribosomal protein S23 [OS=Homo sapiens]	1	1431.75	2.234	61.8	138.2	51.7	69.1	55.2	238.5	123.2	62.3	2808.56	3751.28	2996.14	12956.6	6692.29	3386.76				12956.6	3988.37		Not Found	Not Found	Not Found	High	Peak Found	Not Found	High	0.0008826	0.002059	2.84	32.13
[R].KFGYVDFESAEDLEK.[A]	1xBiotin [K1]	1	2	P19338	P19338 [348-362]	P19338 1xBiotin [K348]	Nucleolin [OS=Homo sapiens]	1	2002.91	2.232	61.9	138.1	62.6	60.8	71.2	207.9	139.7	57.7	4063.86	3945.93	4624.07	13495.6	9069.4	3745.59				13495.6	5405.05		Not Found	Not Found	Not Found	High	High	Not Found	High	0.0008826	0.0001054	3.45	51.57
[K].HVVFGKVK.[E]	1xBiotin [K6]	2	5	P62937	P62937 [126-133]	P62937 1xBiotin [K131]	peptidyl-prolyl cis-trans isomerase A [OS=Homo sapiens]	1	1139.64	2.227	62	138	71.5	55	63.7	175.2	141.9	92.6	22357.4	17186	19905.9	54760.7	44336.7	28946.4	4821.59	4224.73	5170.75	54760.7	26423.1	10919.9	Peak Found	Peak Found	High	High	High	High	High	0.0009289	0.002879	2.75	32.97
[R].VFSGLVSTGLKVR.[I]	1xBiotin [K11]	1	1	P13639	P13639 [416-428]	P13639 1xBiotin [K426]	Elongation factor 2 [OS=Homo sapiens]	1	1588.89	2.222	62.1	137.9	46.2	77.8	60.7	198.9	134.9	81.5	2084.09	3510.03	2739.25	8972.43	6087.7	3675.36				8972.43	3628.06		Not Found	Not Found	Not Found	High	Peak Found	Not Found	High	0.0009289	0.004241	2.22	48.69
[R].LIKDLR.[S]	1xBiotin [K3]	2	9	AGIA-fabID; EGFR-fabID	AGIA-fabID [468-473]; EGFR-fabID [488-493]	AGIA-fabID 1xBiotin [K470]; EGFR-fabID 1xBiotin [K490]	Heavy Heavy	1	983.571	2.222	62.1	137.9	100.3	46.9	59.7	127.2	133.3	132.6	227272	106354	135280	288370	302047	300626	49013.5	26144.4	35140.3	288370	180009	113410	High	High	High	High	High	High	High	0.0009289	0.01406	1.77	37.09
[K].TVTPAKAVTTPGK.[K]	1xBiotin [K6]	1	1	P19338	P19338 [97-109]	P19338 1xBiotin [K102]	Nucleolin [OS=Homo sapiens]	1	1496.81	2.22	86.2	113.8	72	36.1	95.3	211.6	95.1	89.9	4341.03	2178.23	5746.41	12758.6	5734.19	5423.16				12758.6	3417.38		Not Found	Not Found	Not Found	High	Peak Found	Not Found	High	0.0009289	0.01211	2.69	31.99
[RK].AKEFTNVYIK.[N]	1xBiotin [K2]	5	1	P11940-1	P11940-1 [187-196]	P11940-1 1xBiotin [K188]	Polyadenylate-binding protein 1 [OS=Homo sapiens]	1	1438.74	2.219	62.1	137.9	53.1	52.1	58.2	263.4	117.8	55.3	2055.27	2016.89	2254.03	10195.1	4560.41	2139.82				10195.1			Not Found	Not Found	Not Found	High	Not Found	Not Found	High	0.002374	0.04104	2.45	42.97
[K].NLGIGKVSSFEEK.[M]	1xBiotin [K6]	2	2	P40926	P40926 [302-314]	P40926 1xBiotin [K307]	Malate dehydrogenase, mitochondrial [OS=Homo sapiens]	1	1633.83	2.214	62.2	137.8	63.5	57.8	70	212	140.5	56.3	4902.23	4462.34	5404.55	16379.2	10855.4	4348.37				16379.2	6469.46		Not Found	Not Found	Not Found	High	High	Not Found	High	0.0008826	0.001054	3.15	45.71
[K].FAAKGEGQLGPAER.[A]	1xBiotin [K4]	1	1	P13639	P13639 [236-249]	P13639 1xBiotin [K239]	Elongation factor 2 [OS=Homo sapiens]	1	1656.82	2.214	62.2	137.8	74.9	46.2	49	248.4	108.4	73.2	5481.12	3380.96	3584.17	18188.3	7934.53	5359.66				18188.3	4728.7		Not Found	Not Found	Not Found	High	Peak Found	Not Found	High	0.0009289	0.004241	3.28	35.74
[R].VLGPKIEAVQK.[V]	1xBiotin [K5]	4	4	Q7Z4V5	Q7Z4V5 [550-560]	Q7Z4V5 1xBiotin [K554]	Hepatoma-derived growth factor-related protein 2 [OS=Homo sapiens]	1	1407.8	2.211	62.3	137.7	42.4	57.2	113.1	138	126.4	122.9	5566.71	7503.13	14844.7	18109.7	16585.7	16128.8		1844.44	3856.05	18109.7	9884.49	6084.52	Not Found	Peak Found	High	High	High	High	High	0.0008826	0.002702	2.34	38.93
[K].VAQGVSGAVQDKGSIHK.[F]	1xBiotin [K]	1	2	P12268	P12268 [439-455]	P12268 1xBiotin [K]	inosine-5'-monophosphate dehydrogenase 2 [OS=Homo sapiens]	1	1906.98	2.181	62.9	137.1	65.8	58.3	58.7	187	128.1	102	2615.46	2318.29	2334.09	7430.24	5090.87	4052.72				7430.24	3033.98		Not Found	Not Found	Not Found	High	High	Not Found	High	0.0009289	0.005919	3.34	31.83
[K].ENQKHIYYITGETK.[D]	1xBiotin [K4]	2	1	P07900	P07900 [486-499]	P07900 1xBiotin [K489]	Heat shock protein HSP 90-alpha [OS=Homo sapiens]	1	1949.94	2.18	62.9	137.1	61.8	77.7	58.7	231	134.7	36.2	4448.56	5597	4228.17	16634	9698.53	2606.47				16634	5779.99		Not Found	Not Found	Not Found	High	Peak Found	Not Found	High	0.0009289	0.01122	2.82	37.26
[K].AGAHLQGGAKR.[V]	1xBiotin [K10]	2	1	P04406-1	P04406-1 [108-118]	P04406-1 1xBiotin [K117]	glyceraldehyde-3-phosphate dehydrogenase [OS=Homo sapiens]	1	1291.67	2.18	19.2	180.8	119.9	14.3	18	261.2	17.3	169.3	34239.7	4097.78	5150.48	74626	4928.49	48369.1	7384.13			74626		18247	Peak Found	Not Found	Not Found	High	Not Found	Peak Found	High	0.0008826	0.0006538	3.39	20.7
[R].FANYIDKVR.[F]	1xBiotin [K7]	1	1	P08670	P08670 [114-122]	P08670 1xBiotin [K120]	Vimentin [OS=Homo sapiens]	1	1351.68	2.176	74.9	125.1	76.6	68	34.8	231.4	113.4	75.8	5174.04	4593.83	2353.48	15641.5	7664.72	5121.33				15641.5	4567.9		Not Found	Not Found	Not Found	High	Peak Found	Not Found	High	0.0009289	0.00286	2.68	42.96
[K].IPVAIKELR.[E]	1xBiotin [K6]	1	1	P00533-1	P00533-1 [740-748]	P00533-1 1xBiotin [K745]	epidermal growth factor receptor [OS=Homo sapiens]	1	1264.74	2.173	63	137	86	21.2	69	150.2	123.6	150	22485.2	5543.32	18041.6	39251.8	32300	39199.6	4849.15		4686.48	39251.8	19249.7	14787.9	Peak Found	Not Found	Peak Found	Peak Found	High	Peak Found	High	0.0009289	0.006743	2.09	45.37
[KR].LMKEILDK.[K]	1xBiotin [K3]; 1xOxidation [M2]	3	2	P08238	P08238 [566-573]	P08238 1xBiotin [K568]	Heat shock protein HSP 90-beta [OS=Homo sapiens]	1	1231.64	2.165	63.4	136.6	79.2	36.2	60.7	171.5	121.5	130.9	5539.65	2532.34	4243.97	11994.7	8493.43	9152.68				11994.7	5061.79	3452.81	Not Found	Not Found	Not Found	High	High	Peak Found	High	0.0008826	0.001702	2.67	37.78
[R].NTVVPTKK.[S]	1xBiotin [K8]	1	1	P11021	P11021 [440-447]	P11021 1xBiotin [K447]	78 kDa glucose-regulated protein [OS=Homo sapiens]	1	1112.61	2.161	63.3	136.7	50.3	63	73.9	216.4	136.1	60.3	2183.6	2735.51	3209.91	9400.88	5910.65	2620.66				9400.88	3522.54		Not Found	Not Found	Not Found	High	Peak Found	Not Found	High	0.003389	0.0542	1.68	29.56
[K].HWPFQVINDGDKPK.[V]	1xBiotin [K]	1	3	P0DMV8	P0DMV8 [89-102]	P0DMV8 1xBiotin [K]	heat shock 70 kDa protein 1A [OS=Homo sapiens]	0	1906.93	2.151	79.2	120.8	33.6	21.2	47.4	401	45.5	51.3	3665.7	2305.17	5165.02	43697.7	4959.21	5591.94				43697.7			Not Found	Not Found	Not Found	High	Not Found	Not Found	High	0.0008826	0.0002894	3.08	46.64
[K].AFNQGKIFK.[-]	1xBiotin [K6]	2	2	P26641	P26641 [429-437]	P26641 1xBiotin [K434]	elongation factor 1-gamma [OS=Homo sapiens]	1	1278.67	2.146	63.6	136.4	43.7	58.4	71.1	274	125.3	27.5	3208.92	4283.11	5212.53	20099.1	9193.39	2020.33				20099.1	5478.94		Not Found	Not Found	Not Found	High	High	Not Found	High	0.0009289	0.006981	2.01	41.24
[K].DLAGSIIGKGGQR.[I]	1xBiotin [K9]	3	1	P61978	P61978 [397-409]	P61978 1xBiotin [K405]	Heterogeneous nuclear ribonucleoprotein K [OS=Homo sapiens]	1	1497.78	2.14	63.7	136.3	72.2	68.2	42.9	224.6	145.9	46.1	5217.48	4924.41	3100.74	16222	10536.3	3331.92				16222	6279.27		Not Found	Not Found	Not Found	High	Peak Found	Not Found	High	0.0009289	0.003144	2.97	44.63
[K].KSQIFSTASDNQPTVTIK.[V]	1xBiotin [K1]	1	2	P11021	P11021 [447-464]	P11021 1xBiotin [K447]	78 kDa glucose-regulated protein [OS=Homo sapiens]	1	2191.11	2.125	85.3	114.7	80.9	39	81.3	206.9	108.9	82.9	4174.64	2014.19	4195.58	10675.5	5616.67	4279.39				10675.5	3347.34		Not Found	Not Found	Not Found	High	Peak Found	Not Found	High	0.0008826	0.0008088	2.84	42.41
[R].LIGDAAKNQLTSNPENTVFDAK.[R]	1xBiotin [K7]	1	1	P11021	P11021 [75-96]	P11021 1xBiotin [K81]	78 kDa glucose-regulated protein [OS=Homo sapiens]	1	2572.27	2.119	64.1	135.9	58.7	74.9	66.3	174.2	85.5	140.5	2207.26	2818.87	2494.04	6554.01	3217.93	5285.36				6554.01			Not Found	Not Found	Not Found	High	Not Found	Not Found	High	0.003389	0.05925	3.17	48.23
[R].TGCIGAKHR.[I]	1xBiotin [K7]; 1xCarbamidomethyl [C3]	2	1	P62913	P62913 [148-156]	P62913 1xBiotin [K154]	60S ribosomal protein L11 [OS=Homo sapiens]	1	1225.59	2.097	64.1	135.9	60.1	96.9	40.7	203.2	127.4	71.7	3309.72	5335.32	2239.71	11188.1	7012.77	3948.01				11188.1	4179.37		Not Found	Not Found	Not Found	High	Peak Found	Not Found	High	0.0009289	0.01422	2.04	22
[K].AKFENLCK.[LF]	1xBiotin [K2]; 1xCarbamidomethyl [C7]	2	1	P08238	P08238 [558-565]	P08238 1xBiotin [K559]	Heat shock protein HSP 90-beta [OS=Homo sapiens]	1	1235.59	2.088	64.8	135.2	68.4	69.1	46.7	230.5	142.8	42.6	5573.69	5634.08	3806.62	18790	11638.8	3471.19				18790	6936.33		Not Found	Not Found	Not Found	High	Peak Found	Not Found	High	0.0008826	0.001852	2.42	36.57
[R].KTVTAMDVVYALK.[R]	1xBiotin [K1]	1	1	P62805	P62805 [80-92]	P62805 1xBiotin [K80]	histone H4 [OS=Homo sapiens]	1	1664.88	2.083	64.9	135.1	51.1	63.3	51.2	286.4	106.6	41.4	4550.3	5633.12	4556.71	25499.1	9492.41	3687.72				25499.1	5657.14		Not Found	Not Found	Not Found	High	Peak Found	Not Found	High	0.0008826	0.0001024	3.25	54.62
[R].AKEAQDDLVK.[T]	1xBiotin [K2]	1	1	P15311	P15311 [449-458]	P15311 1xBiotin [K450]	Ezrin [OS=Homo sapiens]	1	1342.67	2.082	78.3	121.7	80.9	79.8	41.1	168.4	124.1	105.7	4010.95	3956.65	2039.86	8351.93	6154.1	5242.89				8351.93	3667.63		Not Found	Not Found	Not Found	High	Peak Found	Not Found	High	0.0009289	0.01178	2.21	30.91
[K].IKDPDASKPEDWDER.[A]	1xBiotin [K2]	1	1	P27797	P27797 [208-222]	P27797 1xBiotin [K209]	Calreticulin [OS=Homo sapiens]	1	2026.92	2.061	65.3	134.7	69.6	43.7	62.9	267.7	129.6	26.6	5795.56	3638.21	5235.4	22298.9	10791.5	2211.79				22298.9	6431.34		Not Found	Not Found	Not Found	High	Peak Found	Not Found	High	0.0008826	0.000222	3.17	34.36
[R].MVQEAEKYK.[A]	1xBiotin [K7]	3	1	P11142-1; P0DMV8	P11142-1 [518-526]; P0DMV8 [518-526]	P11142-1 1xBiotin [K524]; P0DMV8 1xBiotin [K524]	Heat shock cognate 71 kDa protein [OS=Homo sapiens] heat shock 70 kDa protein 1A [OS=Homo sapiens]	1	1351.64	2.04	65.8	134.2	64.9	57.9	50.3	259.9	118.1	49	3265.19	2911.37	2528.53	13075.2	5938.37	2462.56				13075.2	3539.06		Not Found	Not Found	Not Found	High	Peak Found	Not Found	High	0.0009289	0.007248	2.18	30.42
[K].KSDPVVSYR.[E]	1xBiotin [K1]	1	2	P13639	P13639 [572-580]	P13639 1xBiotin [K572]	Elongation factor 2 [OS=Homo sapiens]	1	1276.64	2.022	68.8	131.2	64.3	60.8	46.7	218.2	115.8	94.3	5291.22	4998.41	3838.08	17950	9522.94	7760.73				17950	5675.34	2927.7	Not Found	Not Found	Not Found	High	High	Peak Found	High	0.0009289	0.0053	2.24	33.81
[R].EATSPKANK.[E]	1xBiotin [K6]	1	1	P00533-1	P00533-1 [749-757]	P00533-1 1xBiotin [K754]	epidermal growth factor receptor [OS=Homo sapiens]	1	1171.58	2.019	66.2	133.8	53.7	69.2	68	165.9	137.2	106	3610.24	4647.06	4565.8	11146.1	9218.1	7122.18				11146.1	5493.66	2686.81	Not Found	Not Found	Not Found	High	Peak Found	Peak Found	High	0.00223	0.02793	1.79	19.77
[K].KTAEAGGVTGK.[G]	1xBiotin [K1]	1	1	P09874	P09874 [87-97]	P09874 1xBiotin [K87]	Poly [ADP-ribose] polymerase 1 [OS=Homo sapiens]	1	1244.63	2.018	66.3	133.7	70.6	61	68.2	145.9	116.6	137.7	5054.23	4366.97	4883.71	10440.5	8343.41	9856.84				10440.5	4972.39	3718.45	Not Found	Not Found	Not Found	High	Peak Found	Peak Found	High	0.0009289	0.008262	1.86	23.1
[K].NVNAGGHKLGLGLEFQA.[-]	1xBiotin [K8]	1	1	P21796	P21796 [267-283]	P21796 1xBiotin [K274]	voltage-dependent anion-selective channel protein 1 [OS=Homo sapiens]	1	1950.99	2.015	75.8	124.2	46.4	69.7	60.7	230.2	93.5	99.5	2265.64	3403.24	2966.14	11240.9	4564.77	4857.19				11240.9	2720.45		Not Found	Not Found	Not Found	High	Peak Found	Not Found	High	0.0009289	0.004697	3.63	51.44
[K].AGGTKPK.[K]	1xBiotin [K5]	1	1	P16403	P16403 [123-129]	P16403 1xBiotin [K127]	Histone H1.2 [OS=Homo sapiens]	0	884.466	2.004	60.1	139.9	97.1	54.9	46.6	179.9	127.9	93.5	4536.98	2566.07	2178.72	8400.77	5976.03	4366.71				8400.77	3561.5		Not Found	Not Found	Not Found	High	Peak Found	Not Found	High	0.002374	0.03308	1.87	18.06
[R].IIGAKDHASIQMNVAEVDK.[V]	1xBiotin [K5]; 1xOxidation [M12]	1	1	P63220	P63220 [23-41]	P63220 1xBiotin [K27]	40S ribosomal protein S21 [OS=Homo sapiens]	1	2281.13	2	66.7	133.3	71.4	75.1	64	142.7	182	64.8	4716.05	4965.81	4230.93	9431.75	12028.8	4283.29				9431.75	7168.74		Not Found	Not Found	Not Found	High	Peak Found	Not Found	High	0.0009289	0.01436	2.52	36.99
[-].MSKAHPPELK.[K]	1xBiotin [K3]; 1xMet-loss+Acetyl [N-Term]	2	1	P62308	P62308 [1-10]	P62308 1xBiotin [K3]; 1xMet-loss+Acetyl [N-Term]	Small nuclear ribonucleoprotein G [OS=Homo sapiens]	1	1274.66	1.998	66.7	133.3	60.8	44.7	64	239.4	121.5	69.5	5329.96	3921.04	5608.67	20984.7	10649.9	6094.64				20984.7	6346.99	2299.18	Not Found	Not Found	Not Found	High	Peak Found	Peak Found	High	0.001298	0.01555	2.93	33.5
[R].IPKIQQLVK.[E]	1xBiotin [K3]	1	1	P11021	P11021 [368-376]	P11021 1xBiotin [K370]	78 kDa glucose-regulated protein [OS=Homo sapiens]	1	1292.78	1.98	67.1	132.9	49	81.8	53.3	219	105.6	91.2	2790.35	4662.53	3040.11	12480.6	6019.31	5198.88				12480.6	3587.3		Not Found	Not Found	Not Found	High	Peak Found	Not Found	High	0.0009289	0.009513	1.92	45.01
[K].KKELEEIVQPIISK.[L]	1xBiotin [K1]	1	1	P11021	P11021 [620-633]	P11021 1xBiotin [K620]	78 kDa glucose-regulated protein [OS=Homo sapiens]	2	1880.06	1.979	67.1	132.9	43.4	103.1	49.6	229.6	98.2	76.1	2255.06	5358.04	2576.92	11926.8	5100.74	3952.35				11926.8			Not Found	Not Found	Not Found	High	Not Found	Not Found	High	0.0008826	0.002715	2.63	48.48
[R].GQKVLDSGAPIK.[I]	1xBiotin [K3]	1	1	P06576	P06576 [122-133]	P06576 1xBiotin [K124]	ATP synthase subunit beta, mitochondrial [OS=Homo sapiens]	1	1438.77	1.971	67.3	132.7	70.5	51.3	66.2	219.4	130.4	62.3	3866.24	2814.33	3628.69	12032.4	7153.27	3415.34				12032.4	4263.1		Not Found	Not Found	Not Found	High	Peak Found	Not Found	High	0.0009289	0.005129	2.74	36.04
[K].HKLDVTSVEDYK.[A]	1xBiotin [K2]	2	1	P48643	P48643 [264-275]	P48643 1xBiotin [K265]	T-complex protein 1 subunit epsilon [OS=Homo sapiens]	1	1659.8	1.968	74.9	125.1	85.6	38.2	75.2	168.4	125.7	107	4561.61	2037.03	4008.21	8979.27	6701.25	5702.61				8979.27	3993.71		Not Found	Not Found	Not Found	High	Peak Found	Not Found	High	0.0008826	0.001455	2.42	38.27
[K].VEQKYNK.[L]	1xBiotin [K4]	5	1	Q01105	Q01105 [69-75]	Q01105 1xBiotin [K72]	Protein SET [OS=Homo sapiens]	1	1134.56	1.956	67.7	132.3	68.9	60.3	62.8	230.5	122.9	54.5	3154.16	2762.22	2875.81	10552.6	5626.1	2494.32				10552.6	3352.96		Not Found	Not Found	Not Found	High	Peak Found	Not Found	High	0.00223	0.02916	1.52	23
[R].TLSDYNIQKESTLHLVLR.[L]	1xBiotin [K9]	4	1	P62987	P62987 [55-72]	P62987 1xBiotin [K63]	Ubiquitin-60S ribosomal protein L40 [OS=Homo sapiens]	1	2356.23	1.931	108.9	91.1	87.2	91.5	34.8	73	246.4	67.2	5348.26	5608.73	2132.47	4473.47	15107.4	4117.73				4473.47	9003.51		Not Found	Not Found	Not Found	Peak Found	High	Not Found	High	0.0008826	0.002604	2.03	52.51
[R].LAKADGIVSK.[N]	1xBiotin [K3]	1	1	P63220	P63220 [72-81]	P63220 1xBiotin [K74]	40S ribosomal protein S21 [OS=Homo sapiens]	1	1227.68	1.928	68.3	131.7	55.3	88.6	43.1	224.7	106.6	81.8	3634.13	5821.94	2830.74	14767.1	7007.62	5373.6				14767.1	4176.3		Not Found	Not Found	Not Found	High	Peak Found	Not Found	High	0.003241	0.04783	2.08	34.12
[K].KTKPYIQVDIGGGQTK.[T]	1xBiotin [K1]	1	1	P11021	P11021 [123-138]	P11021 1xBiotin [K123]	78 kDa glucose-regulated protein [OS=Homo sapiens]	1	1959.04	1.926	61.8	138.2	65	95.3	52.1	183.5	145.3	58.7	3927.28	5753.04	3145.35	11081.7	8773.5	3544.98				11081.7	5228.7		Not Found	Not Found	Not Found	High	Peak Found	Not Found	High	0.0008826	0.001148	2.54	37.68
[K].TEWLDGKHVVFGK.[V]	1xBiotin [K7]	2	5	P62937	P62937 [119-131]	P62937 1xBiotin [K125]	peptidyl-prolyl cis-trans isomerase A [OS=Homo sapiens]	1	1741.87	1.924	71.4	128.6	73.8	50.1	63.3	202.4	114	96.4	29305.7	19898.1	25117.7	80366.2	45275.4	38282.7	6320.05	4891.42	6524.56	80366.2	26982.6	14442	Peak Found	Peak Found	High	High	High	High	High	0.0008826	0.001221	2.35	47.88
[R].LPLQDVYKIGGIGTVPVGR.[V]	1xBiotin [K8]	4	4	P68104	P68104 [248-266]	P68104 1xBiotin [K255]	Elongation factor 1-alpha 1 [OS=Homo sapiens]	1	2208.22	1.92	68.6	131.4	29.5	78.9	77.7	151.5	148.7	113.7	4513.39	12065.9	11884.3	23169.4	22747.3	17394.9		2966.07	3087.06	23169.4	13556.6	6562.15	Not Found	Peak Found	High	High	High	Peak Found	High	0.0008826	4.687e-05	2.93	55.46
[K].FVLSSGKFYGDEEKDK.[G]	1xBiotin [K7]	1	1	P27797	P27797 [49-64]	P27797 1xBiotin [K55]	Calreticulin [OS=Homo sapiens]	2	2074.98	1.919	61.3	138.7	106.1	51.2	49.1	203.6	115.8	74.1	10940.3	5278.34	5065.4	20989.2	11939.7	7636.8	2359.38			20989.2	7115.63	2880.95	Peak Found	Not Found	Not Found	High	Peak Found	Peak Found	High	0.001298	0.0171	2.16	43.78
[-].MASNVTNKTDPR.[S]	1xBiotin [K8]; 1xMet-loss+Acetyl [N-Term]	4	2	P07910-1	P07910-1 [1-12]	P07910-1 1xBiotin [K8]; 1xMet-loss+Acetyl [N-Term]	Heterogeneous nuclear ribonucleoproteins C1/C2 [OS=Homo sapiens]	1	1470.7	1.916	68.6	131.4	100.1	66	54.4	196.2	126.4	56.9	5096.78	3359.45	2772.21	9992.26	6437.45	2897.71				9992.26	3836.49		Not Found	Not Found	Not Found	High	High	Not Found	High	0.0009289	0.003276	2.22	33.81
[K].KQGGLGPMNIPLVSDPK.[R]	1xBiotin [K1]	1	1	Q06830	Q06830 [93-109]	Q06830 1xBiotin [K93]	peroxiredoxin-1 [OS=Homo sapiens]	1	1977.03	1.91	73	127	66.2	86.8	53.7	165.9	112.2	115.2	3218.54	4219.87	2608.39	8061.91	5452.93	5601.01				8061.91			Not Found	Not Found	Not Found	High	Not Found	Not Found	High	0.0008826	0.001471	3.65	50.91
[K].SKFADLSEAANR.[N]	1xBiotin [K2]	1	1	P08670	P08670 [293-304]	P08670 1xBiotin [K294]	Vimentin [OS=Homo sapiens]	1	1534.73	1.88	69.4	130.6	54.7	54.3	58.2	253.5	102.8	76.5	5127.97	5090.33	5457.97	23767.9	9640.17	7169.49				23767.9	5745.21	2704.66	Not Found	Not Found	Not Found	High	Peak Found	Peak Found	High	0.0008826	0.0005801	2.8	42.37
[K].KAAIISAEGDSK.[A]	1xBiotin [K1]	1	2	P35232	P35232 [208-219]	P35232 1xBiotin [K208]	Prohibitin [OS=Homo sapiens]	1	1415.72	1.864	69.8	130.2	79.7	43.7	75.1	212	139.9	49.6	3918.82	2148.81	3690.01	10422.6	6876.66	2435.87				10422.6	4098.25		Not Found	Not Found	Not Found	High	High	Not Found	High	0.0008826	0.002399	2.31	33.51
[R].KPLLESGTLGTK.[G]	1xBiotin [K1]	2	1	P22314	P22314 [593-604]	P22314 1xBiotin [K593]	Ubiquitin-like modifier-activating enzyme 1 [OS=Homo sapiens]	0	1469.8	1.862	69.9	130.1	82.1	47	66.1	229.4	52.4	123.1	3907.75	2239.26	3146.44	10919.8	2492.7	5858.3				10919.8			Not Found	Not Found	Not Found	High	Not Found	Not Found	High	0.0008826	0.0005917	2.78	40.57
[K].YKEALLGR.[V]	1xBiotin [K2]	2	1	P52565-1	P52565-1 [51-58]	P52565-1 1xBiotin [K52]	rho GDP-dissociation inhibitor 1 [OS=Homo sapiens]	1	1175.62	1.86	92.6	107.4	40.3	89.1	99.7	192.4	75	103.4	2263.26	4997.98	5596.33	10795.1	4210.68	5801.47				10795.1	2509.42		Not Found	Not Found	Not Found	High	Peak Found	Not Found	High	0.0009289	0.01144	1.76	39.25
[K].EGAKHFSGLEEAVYR.[N]	1xBiotin [K4]	1	1	P50990	P50990 [17-31]	P50990 1xBiotin [K20]	T-complex protein 1 subunit theta [OS=Homo sapiens]	1	1918.91	1.86	69.9	130.1	95.6	45.5	76.6	193.1	142.6	46.7	5695.92	2708.99	4566.86	11508.6	8495.84	2781.69				11508.6	5063.23		Not Found	Not Found	Not Found	High	Peak Found	Not Found	High	0.0009289	0.003358	3.48	41.75
[R].YQQFKDFQR.[R]	1xBiotin [K5]	3	1	Q13838-1	Q13838-1 [330-338]	Q13838-1 1xBiotin [K334]	spliceosome RNA helicase DDX39B [OS=Homo sapiens]	1	1485.69	1.85	95.1	104.9	49.1	87.9	96	177.6	92.4	97	2743.71	4905.73	5358.34	9915.38	5160.44	5412.62				9915.38	3075.44		Not Found	Not Found	Not Found	High	Peak Found	Not Found	High	0.0009289	0.003463	2.37	39.39
[K].LNILKLAPGGHVGR.[F]	1xBiotin [K5]	1	1	P36578	P36578 [235-248]	P36578 1xBiotin [K239]	60S ribosomal protein L4 [OS=Homo sapiens]	1	1670.95	1.843	72.3	127.7	92.5	35	79.5	170.5	140.3	82.2	5463.96	2067.49	4693.22	10070.7	8284.46	4855.31				10070.7	4937.25		Not Found	Not Found	Not Found	High	Peak Found	Not Found	High	0.0009289	0.004134	2.62	47.36
[K].DLKDYFSK.[F]	1xBiotin [K3]	4	1	Q14103	Q14103 [112-119]	Q14103 1xBiotin [K114]	heterogeneous nuclear ribonucleoprotein D0 [OS=Homo sapiens]	1	1241.59	1.843	79.8	120.2	67	84.9	49	207.8	100.9	90.3	4058.21	5147	2970.27	12594	6112.98	5474.02				12594	3643.13		Not Found	Not Found	Not Found	High	Peak Found	Not Found	High	0.0009289	0.01134	1.68	47.62
[K].NKYNTPK.[Y]	1xBiotin [K2]	1	1	P46777	P46777 [42-48]	P46777 1xBiotin [K43]	60S ribosomal protein L5 [OS=Homo sapiens]	1	1090.53	1.841	70.4	129.6	65.3	84	67.1	181.4	123.5	78.6	3283.71	4223.23	3372.77	9116.61	6208.86	3949.29				9116.61	3700.26		Not Found	Not Found	Not Found	High	Peak Found	Not Found	High	0.00223	0.02554	2.13	25.49
[K].GTPGKGATPAPPGK.[A]	1xBiotin [K5]	8	1	Q13428-1	Q13428-1 [309-322]	Q13428-1 1xBiotin [K313]	Treacle protein [OS=Homo sapiens]	1	1461.75	1.838	72.3	127.7	2.4	84.5	94.1	96.9	149.2	173	2253.11	79025.7	88055.8	90623.5	139575	161822		19426.3	22873.4	90623.5	83182.1	61046.6	Not Found	High	Peak Found	Peak Found	Peak Found	Peak Found	High	0.0009289	0.0137	2.47	27.46
[K].SDVEAIFSKYGK.[I]	1xBiotin [K9]	6	1	P07910-1	P07910-1 [31-42]	P07910-1 1xBiotin [K39]	Heterogeneous nuclear ribonucleoproteins C1/C2 [OS=Homo sapiens]	1	1569.76	1.827	89.7	110.3	50.8	88	87.2	160.8	107.4	105.8	2365.74	4099.26	4063.78	7489.09	5001.18	4929.15				7489.09			Not Found	Not Found	Not Found	High	Not Found	Not Found	High	0.00223	0.03043	2.44	50.53
[K].VKEGMNIVEAMER.[F]	1xBiotin [K2]; 1xOxidation [M5]	2	1	P62937	P62937 [132-144]	P62937 1xBiotin [K133]	peptidyl-prolyl cis-trans isomerase A [OS=Homo sapiens]	1	1747.82	1.827	94.8	105.2	98.6	90.1	39.2	180.1	92	99.9	5714.04	5222.74	2274.32	10437.9	5328.58	5790.52				10437.9			Not Found	Not Found	Not Found	High	Not Found	Not Found	High	0.0008826	0.001584	2.63	44.04
[K].VAGQDGSVVQFKIK.[R]	1xBiotin [K]	5	2	Q6EEV6	Q6EEV6 [22-35]	Q6EEV6 1xBiotin [K]	small ubiquitin-related modifier 4 [OS=Homo sapiens]	1	1701.9	1.826	100	100	91.6	99.5	46.9	181.7	91.6	88.7	5312.23	5772.84	2719.48	10542.5	5315.51	5148.77				10542.5			Not Found	Not Found	Not Found	High	High	Not Found	High	0.0009289	0.003896	2.34	43.96
[R].GDGTGGKSIYGER.[F]	1xBiotin [K7]	1	1	P23284	P23284 [110-122]	P23284 1xBiotin [K116]	peptidyl-prolyl cis-trans isomerase B [OS=Homo sapiens]	1	1522.7	1.822	70.9	129.1	101.3	58.6	54.9	223.8	54.6	106.7	5755.49	3327.12	3117.88	12712.8	3102.39	6061.41				12712.8		2286.64	Not Found	Not Found	Not Found	High	Not Found	Peak Found	High	0.0008826	0.001545	2.45	32.75
[K].AETAAKHGEAQVK.[I]	1xBiotin [K6]	2	1	P18669	P18669 [101-113]	P18669 1xBiotin [K106]	Phosphoglycerate mutase 1 [OS=Homo sapiens]	1	1565.77	1.819	67.2	132.8	93.8	80.1	54.4	158.2	170.5	43.1	4710.61	4022.35	2733.01	7946.79	8567.6	2167.05				7946.79	5105.99		Not Found	Not Found	Not Found	High	Peak Found	Not Found	High	0.001693	0.01914	2.44	20.51
[R].VKLLLQVQHASK.[Q]	1xBiotin [K2]	3	2	P12236; P05141	P12236 [32-43]; P05141 [32-43]	P12236 1xBiotin [K33]; P05141 1xBiotin [K33]	ADP/ATP translocase 3 [OS=Homo sapiens] ADP/ATP translocase 2 [OS=Homo sapiens]	1	1589.92	1.81	71.2	128.8	58.5	61.6	53.5	253.1	105.8	67.6	5166.47	5446.26	4730.77	22368.2	9351.41	5970.88				22368.2	5573.12	2252.49	Not Found	Not Found	Not Found	High	Peak Found	Peak Found	High	0.0009289	0.01465	2.17	40.89
[R].KFLDGIYVSEK.[G]	1xBiotin [K1]	1	1	P32969	P32969 [174-184]	P32969 1xBiotin [K174]	60S ribosomal protein L9 [OS=Homo sapiens]	1	1524.78	1.807	55.9	144.1	105.4	55.1	49.5	190.5	57.5	142	5902.74	3086.1	2769.12	10664.6	3217.67	7946.51				10664.6		2997.78	Not Found	Not Found	Not Found	High	Not Found	Peak Found	High	0.0008826	2.668e-05	3.17	46.63
[K].TATPQQAQEVHEKLR.[G]	1xBiotin [K13]	3	1	P60174-1	P60174-1 [176-190]	P60174-1 1xBiotin [K188]	Isoform 2 of Triosephosphate isomerase [OS=Homo sapiens]	1	1961.99	1.807	71.3	128.7	61.9	70.9	82.4	198.7	128.1	58	3395.63	3888.98	4517.67	10900.9	7025.56	3182.34				10900.9	4186.99		Not Found	Not Found	Not Found	High	Peak Found	Not Found	High	0.0008826	0.0002453	3.17	32.26
[K].LTLSALLDGKNVNAGGHK.[L]	1xBiotin [K10]	1	1	P21796	P21796 [257-274]	P21796 1xBiotin [K266]	voltage-dependent anion-selective channel protein 1 [OS=Homo sapiens]	1	2034.08	1.794	71.6	128.4	67.6	49.7	120.2	125.4	115.8	121.3	3116.19	2291.6	5539.95	5781.58	5340.34	5590.06				5781.58	3182.66		Not Found	Not Found	Not Found	High	Peak Found	Not Found	High	0.0009289	0.0046	2.75	50.92
[K].VKEGMNIVEAMER.[F]	1xBiotin [K2]	2	1	P62937	P62937 [132-144]	P62937 1xBiotin [K133]	peptidyl-prolyl cis-trans isomerase A [OS=Homo sapiens]	1	1731.82	1.79	71.7	128.3	74.7	68.3	66	222.5	122.3	46.2	3522.04	3222.03	3110.62	10491.6	5767.91	2179.12				10491.6			Not Found	Not Found	Not Found	High	Not Found	Not Found	High	0.0009289	0.005872	2.41	50.46
[RK].DAFPVAGQKLIYAGK.[I]	1xBiotin [K9]	4	1	P54725-1	P54725-1 [39-53]	P54725-1 1xBiotin [K47]	UV excision repair protein RAD23 homolog A [OS=Homo sapiens]	1	1803.95	1.782	66.1	133.9	94.1	64.7	58.1	148.3	131.1	103.6	5446.39	3743.02	3365.21	8584.22	7589.88	5997.04				8584.22	4523.3	2262.36	Not Found	Not Found	Not Found	High	Peak Found	Peak Found	High	0.002374	0.03606	2.29	50.38
[K].IEKAVVSQR.[L]	1xBiotin [K3]	1	1	P14625	P14625 [631-639]	P14625 1xBiotin [K633]	Endoplasmin [OS=Homo sapiens]	1	1255.68	1.78	71.9	128.1	78.8	45.3	90.6	140.2	153.7	91.5	4623.63	2658.48	5319.62	8229.84	9021.14	5374.46				8229.84	5376.29		Not Found	Not Found	Not Found	High	Peak Found	Not Found	High	0.0009289	0.005447	2.14	32.04
[K].YKAEDEVQR.[E]	1xBiotin [K2]	3	2	P0DMV8	P0DMV8 [525-533]	P0DMV8 1xBiotin [K526]	heat shock 70 kDa protein 1A [OS=Homo sapiens]	1	1363.63	1.76	72.5	127.5	11.8	63.1	17.4	30.6	467	10.2	2860.21	15265.3	4199.96	7391.63	112968	2469.41		3752.56		7391.63	67325		Not Found	Peak Found	Not Found	High	High	Not Found	High	0.0008826	0.002841	1.95	27.5
[K].LKGEMMDLQHGSLFLQTPK.[I]	1xBiotin [K2]; 2xOxidation [M5; M6]	1	1	P07195	P07195 [59-77]	P07195 1xBiotin [K60]	L-lactate dehydrogenase B chain [OS=Homo sapiens]	1	2431.18	1.759	70.9	129.1	85.7	81.6	75.7	150.7	148.7	57.6	5135.45	4892.44	4537.33	9031.59	8916.12	3455.75				9031.59	5313.7		Not Found	Not Found	Not Found	High	Peak Found	Not Found	High	0.00223	0.02386	2.11	43.2
[K].KVVNPLFEK.[R]	1xBiotin [K1]	1	1	P62424	P62424 [26-34]	P62424 1xBiotin [K26]	60S ribosomal protein L7a [OS=Homo sapiens]	1	1299.71	1.757	83.9	116.1	96.6	55.2	72.5	178.6	97	100.2	5106.01	2919.06	3830.79	9441.21	5127.78	5297.37				9441.21			Not Found	Not Found	Not Found	High	Not Found	Not Found	High	0.0009289	0.01098	2.15	43.42
[R].KVIDDTNITR.[L]	1xBiotin [K1]	1	1	P05783	P05783 [187-196]	P05783 1xBiotin [K187]	Keratin, type I cytoskeletal 18 [OS=Homo sapiens]	1	1400.72	1.741	76.3	123.7	81.9	38.3	79.7	129.2	142.6	128.2	5550.44	2596.56	5402.61	8759.04	9665.05	8692.31				8759.04	5760.04	3279.13	Not Found	Not Found	Not Found	High	Peak Found	Peak Found	High	0.0008826	0.0008852	2.52	35.28
[K].SPQVKPASTMGMGPLGKGAGPVPPGK.[V]	1xBiotin [K17]; 1xOxidation [M]	8	2	Q13428-1	Q13428-1 [503-528]	Q13428-1 1xBiotin [K519]	Treacle protein [OS=Homo sapiens]	1	2688.37	1.729	88.2	111.8	80.4	54.1	74.9	202	95	93.6	4983.83	3355.8	4647.35	12525.6	5892	5801.26				12525.6			Not Found	Not Found	Not Found	High	Not Found	Not Found	High	0.0009289	0.01105	2.97	37.54
[R].GLKLTFDSSFSPNTGK.[K]	1xBiotin [K3]	1	1	P21796	P21796 [94-109]	P21796 1xBiotin [K96]	voltage-dependent anion-selective channel protein 1 [OS=Homo sapiens]	1	1924.95	1.717	73	127	71.2	81.7	71.7	128.4	124.6	122.3	2594.5	2977.19	2609.75	4677.15	4539.85	4454.75				4677.15			Not Found	Not Found	Not Found	High	Not Found	Not Found	High	0.0008826	0.00221	2.32	50.61
[K].HLIPAANTGESKVFYYK.[M]	1xBiotin [K12]	2	1	P62258-1	P62258-1 [107-123]	P62258-1 1xBiotin [K118]	14-3-3 protein epsilon [OS=Homo sapiens]	1	2164.09	1.708	89.9	110.1	89	53.3	89.7	168.1	91	108.9	4445.43	2662.36	4479.92	8400.89	4547.71	5442.11				8400.89	2710.28		Not Found	Not Found	Not Found	High	Peak Found	Not Found	High	0.0008826	0.0002813	3.33	43.51
[K].ESYSVYVYKVLK.[Q]	1xBiotin [K9]	10	2	P58876; Q93079	P58876 [36-47]; Q93079 [36-47]	P58876 1xBiotin [K44]; Q93079 1xBiotin [K44]	Histone H2B type 1-D [OS=Homo sapiens] Histone H2B type 1-H [OS=Homo sapiens]	1	1703.87	1.701	100.1	99.9	52.3	100	93.7	89	171.3	93.6	2924.59	5585.86	5236.2	4974.87	9574.3	5230.95				4974.87	5705.95		Not Found	Not Found	Not Found	High	High	Not Found	High	0.0008826	0.001835	1.89	53.45
[K].IKVAQGVSGAVQDK.[G]	1xBiotin [K2]	1	1	P12268	P12268 [437-450]	P12268 1xBiotin [K438]	inosine-5'-monophosphate dehydrogenase 2 [OS=Homo sapiens]	1	1625.87	1.701	69.5	130.5	69.5	93.8	63.9	159.5	130.6	82.8	2987.91	4030.92	2744.97	6855.37	5611.13	3557.11				6855.37	3344.04		Not Found	Not Found	Not Found	High	Peak Found	Not Found	High	0.00223	0.02887	2.36	33.95
[R].SRPVINIQKTITVTPNR.[I]	1xBiotin [K9]	8	2	P23229-1	P23229-1 [503-519]	P23229-1 1xBiotin [K511]	integrin alpha-6 [OS=Homo sapiens]	1	2163.21	1.697	74.1	125.9	64.5	42.3	107	109.5	172	104.7	3059.69	2006.39	5073.91	5193.81	8155.16	4964.82				5193.81	4860.19		Not Found	Not Found	Not Found	High	High	Not Found	High	0.0009289	0.01041	2.58	42.95
[K].GGNEESTKTGNAGSR.[L]	1xBiotin [K8]	1	1	P00441	P00441 [130-144]	P00441 1xBiotin [K137]	Superoxide dismutase [Cu-Zn] [OS=Homo sapiens]	1	1690.74	1.668	75	125	51.1	67.4	103	191.9	112.4	74.3	2391.19	3155.99	4822.98	8987.12	5263.14	3481.77				8987.12	3136.65		Not Found	Not Found	Not Found	High	Peak Found	Not Found	High	0.0008826	0.0002888	2.93	21.04
[K].KAAVHYDR.[S]	1xBiotin [K1]	1	1	Q86V81	Q86V81 [134-141]	Q86V81 1xBiotin [K134]	THO complex subunit 4 [OS=Homo sapiens]	1	1185.58	1.666	61.3	138.7	95.1	67.1	49.8	151.9	158.4	77.6	4555.16	3216.99	2387.69	7279.26	7588.44	3719.09				7279.26	4522.45	1403.01	Not Found	Not Found	Not Found	High	Peak Found	Peak Found	High	0.0008826	0.002006	2.03	23.44
[K].EFFNGKEPSR.[G]	1xBiotin [K6]	1	1	P11021	P11021 [377-386]	P11021 1xBiotin [K382]	78 kDa glucose-regulated protein [OS=Homo sapiens]	1	1436.66	1.662	75.1	124.9	81.3	62.9	65.5	222.7	108.9	58.5	3376.1	2612.12	2720.45	9243.62	4520.57	2428.92				9243.62			Not Found	Not Found	Not Found	High	Not Found	Not Found	High	0.0009289	0.004633	2.7	38.33
[R].EDSVKPGAHLTVKK.[I]	1xBiotin [K13]	2	1	P51991-1	P51991-1 [114-127]	P51991-1 1xBiotin [K126]	Heterogeneous nuclear ribonucleoprotein A3 [OS=Homo sapiens]	1	1734.92	1.662	89.4	110.6	111.2	20.9	96.3	184.8	119.1	67.8	24333.2	4572.52	21070.5	40433.6	26061.8	14827.7	5247.7		5473.27	40433.6	15532	5593.69	Peak Found	Not Found	Peak Found	High	Peak Found	Peak Found	High	0.0009289	0.01184	3.42	28.09
[R].KSSTPEEVK.[K]	1xBiotin [K1]	1	1	P23528	P23528 [22-30]	P23528 1xBiotin [K22]	Cofilin-1 [OS=Homo sapiens]	1	1230.6	1.657	59.5	140.5	47.6	120.5	50.6	182.8	119.5	79	5196.72	13147.7	5516.23	19935.6	13039.2	8613.06		3232.01		19935.6	7770.9	3249.24	Not Found	Peak Found	Not Found	Peak Found	High	Peak Found	High	0.003241	0.04848	1.52	23.55
[K].VTEKIPVR.[H]	1xBiotin [K4]	2	1	Q00839	Q00839 [340-347]	Q00839 1xBiotin [K343]	Heterogeneous nuclear ribonucleoprotein U [OS=Homo sapiens]	1	1167.66	1.657	88.1	111.9	102.1	52.7	76.9	183	97.8	87.4	5782.87	2986.07	4356.84	10362.7	5535.97	4948.29				10362.7	3299.25		Not Found	Not Found	Not Found	High	Peak Found	Not Found	High	0.00223	0.02997	1.46	34.62
[K].QKVDSLLENLEK.[I]	1xBiotin [K2]	7	1	P07910-1	P07910-1 [205-216]	P07910-1 1xBiotin [K206]	Heterogeneous nuclear ribonucleoproteins C1/C2 [OS=Homo sapiens]	1	1641.85	1.656	78.3	121.7	72.5	90.5	52.8	183.9	112.7	87.5	4366.89	5450.41	3180.1	11072.1	6783.86	5264.88				11072.1	4042.95		Not Found	Not Found	Not Found	High	Peak Found	Not Found	High	0.0008826	0.0002611	2.38	51.84
[R].DNIQGITKPAIR.[R]	1xBiotin [K8]	1	1	P62805	P62805 [25-36]	P62805 1xBiotin [K32]	histone H4 [OS=Homo sapiens]	0	1551.83	1.652	75.4	124.6	39.1	25.8	40.8	393.6	64.7	36.1	4300.18	2830.13	4482.8	43242.3	7103.36	3961.75				43242.3	4233.36		Not Found	Not Found	Not Found	High	Peak Found	Not Found	High	0.0009289	0.004966	2.25	41.79
[K].LIKNNASTDYDLSDK.[S]	1xBiotin [K3]	1	1	P39023	P39023 [298-312]	P39023 1xBiotin [K300]	60S ribosomal protein L3 [OS=Homo sapiens]	1	1922.92	1.651	75.4	124.6	70	62.8	73.1	240.7	115.6	37.8	4358.37	3909.74	4547.68	14980.1	7196.09	2354.25				14980.1	4288.62		Not Found	Not Found	Not Found	High	Peak Found	Not Found	High	0.0009289	0.006896	2.36	37.34
[K].LIINSLYKNK.[E]	1xBiotin [K8]	1	2	P14625	P14625 [88-97]	P14625 1xBiotin [K95]	Endoplasmin [OS=Homo sapiens]	1	1431.8	1.648	76.6	123.4	76.4	47.9	94.4	179.2	123	79	4161.65	2608.46	5141.62	9755.24	6697.56	4298.83				9755.24	3991.51		Not Found	Not Found	Not Found	High	High	Not Found	High	0.0009289	0.005918	2.51	44.59
[R].HLELKEK.[G]	1xBiotin [K5]	2	1	P41227-1	P41227-1 [161-167]	P41227-1 1xBiotin [K165]	N-alpha-acetyltransferase 10 [OS=Homo sapiens]	1	1122.6	1.642	76.6	123.4	65.3	57.7	104.1	170.9	96.7	105.3	2776.63	2450.52	4422.49	7263.79	4107.73	4474.51				7263.79			Not Found	Not Found	Not Found	High	Not Found	Not Found	High	0.00223	0.02594	2.16	29.32
[R].LVSLIGSKTQIPTQR.[Y]	1xBiotin [K8]	2	1	P25786-1	P25786-1 [108-122]	P25786-1 1xBiotin [K115]	Proteasome subunit alpha type-1 [OS=Homo sapiens]	1	1867.05	1.64	73.3	126.7	68.4	72.2	97.3	124.9	112.1	125.2	2941.45	3106.39	4185.38	5371.71	4822.73	5386.79				5371.71			Not Found	Not Found	Not Found	High	Not Found	Not Found	High	0.0008826	0.001269	2.92	47.23
[R].VFIGNLNTLVVKK.[S]	1xBiotin [K12]	7	2	P07910-1	P07910-1 [18-30]	P07910-1 1xBiotin [K29]	Heterogeneous nuclear ribonucleoproteins C1/C2 [OS=Homo sapiens]	1	1670.97	1.639	97.1	102.9	45.9	88.3	89.7	207.3	93.7	75.2	2856.91	5503.39	5585.97	12916.1	5834.97	4682.94				12916.1	3477.44		Not Found	Not Found	Not Found	High	High	Not Found	High	0.0008826	0.0002325	3.69	52.64
[R].KAMEAVAAQGK.[A]	1xBiotin [K1]; 1xOxidation [M3]	2	2	P18669	P18669 [241-251]	P18669 1xBiotin [K241]	Phosphoglycerate mutase 1 [OS=Homo sapiens]	1	1345.66	1.634	75.9	124.1	77.9	105.8	45.9	127.3	149.4	93.7	3640.87	4941.54	2142.14	5947.39	6976.74	4378.95				5947.39	4157.89		Not Found	Not Found	Not Found	High	High	Not Found	High	0.0008826	0.0006034	1.94	22.34
[R].KVLIIGGGDGGVLR.[E]	1xBiotin [K1]	1	1	P19623	P19623 [96-109]	P19623 1xBiotin [K96]	spermidine synthase [OS=Homo sapiens]	1	1579.9	1.611	90.8	109.2	103.7	50	84.8	167	102.1	92.4	4958.72	2392.74	4057.17	7987.08	4883.41	4420.38				7987.08			Not Found	Not Found	Not Found	High	Not Found	Not Found	High	0.001693	0.0189	2.04	48.67
[K].LTFDSSFSPNTGKK.[N]	1xBiotin [K14]	1	1	P21796	P21796 [97-110]	P21796 1xBiotin [K110]	voltage-dependent anion-selective channel protein 1 [OS=Homo sapiens]	1	1754.84	1.608	76.7	123.3	78.9	83.2	81.6	142.6	82.4	131.2	4227.79	4459.38	4370.64	7639.9	4416.98	7029.33				7639.9		2651.78	Not Found	Not Found	Not Found	High	Not Found	Peak Found	High	0.0009289	0.006062	3.61	42.74
[K].ITVTSEVPFSKR.[Y]	1xBiotin [K11]	1	1	P35268	P35268 [70-81]	P35268 1xBiotin [K80]	60S ribosomal protein L22 [OS=Homo sapiens]	1	1589.84	1.605	79.6	120.4	86.4	41.5	70.4	228.7	106.4	66.6	4242.26	2037.9	3453.4	11226	5221.38	3270.39				11226	3111.76		Not Found	Not Found	Not Found	High	Peak Found	Not Found	High	0.0009289	0.01263	1.92	43.62
[K].GIVEFSGKPAAR.[K]	1xBiotin [K8]	2	1	Q15233	Q15233 [191-202]	Q15233 1xBiotin [K198]	Non-POU domain-containing octamer-binding protein [OS=Homo sapiens]	0	1457.76	1.604	76.8	123.2	73.8	83.4	64.5	208	118.4	51.9	4831.26	5462.21	4221.34	13612.7	7750.41	3397.02				13612.7	4618.97		Not Found	Not Found	Not Found	High	Peak Found	Not Found	High	0.0009289	0.007857	2.39	41
[K].NLGTIAKSGTSEFLNK.[M]	1xBiotin [K7]	1	1	P14625	P14625 [162-177]	P14625 1xBiotin [K168]	Endoplasmin [OS=Homo sapiens]	1	1905.97	1.597	88.6	111.4	96.5	54.5	88.1	154.2	110.9	95.8	4138.55	2335.85	3778.15	6609.58	4752.07	4106.93				6609.58			Not Found	Not Found	Not Found	High	Not Found	Not Found	High	0.0009289	0.01155	3.06	47.93
[K].EIAENALGKHK.[E]	1xBiotin [K9]	3	2	P31942	P31942 [68-78]	P31942 1xBiotin [K76]	Heterogeneous nuclear ribonucleoprotein H3 [OS=Homo sapiens]	1	1435.74	1.596	97.1	102.9	69.9	39.1	111.4	243.1	74	62.5	3592.15	2011.95	5728.06	12503.5	3807	3211.92				12503.5			Not Found	Not Found	Not Found	High	Not Found	Not Found	High	0.0008826	0.001984	3.15	30.67
[R].IMKAQAYQTGK.[DG]	1xBiotin [K3]	2	2	P14625	P14625 [661-671]	P14625 1xBiotin [K663]	Endoplasmin [OS=Homo sapiens]	1	1464.73	1.595	77.1	122.9	40	25.4	300.9	123.9	63.9	45.9	5159.71	3278.36	38760.3	15963.1	8231.44	5907.89			10068.4	15963.1	4905.65		Not Found	Not Found	High	High	Peak Found	Not Found	High	0.0008826	0.002149	2.01	31.65
[K].KYEDICPSTHNMDVPNIK.[R]	1xBiotin [K1]; 1xCarbamidomethyl [C6]; 1xOxidation [M12]	4	2	Q6IS14	Q6IS14 [68-85]	Q6IS14 1xBiotin [K68]	Eukaryotic translation initiation factor 5A-1-like [OS=Homo sapiens]	1	2403.08	1.595	75.7	124.3	52.2	80.5	97.2	154.8	132.1	83.2	2877.59	4441.61	5361.46	8536.89	7288.18	4590.11				8536.89	4343.5		Not Found	Not Found	Not Found	High	High	Not Found	High	0.0009289	0.006807	2.59	36.26
[K].SKITVTSEVPFSK.[R]	1xBiotin [K2]	1	1	P35268	P35268 [68-80]	P35268 1xBiotin [K69]	60S ribosomal protein L22 [OS=Homo sapiens]	1	1648.86	1.592	77.2	122.8	59.6	62.1	76	231.1	98.8	72.4	3967.77	4132.98	5059.04	15391.8	6578.27	4823.81				15391.8	3920.42		Not Found	Not Found	Not Found	High	Peak Found	Not Found	High	0.0008826	0.002383	2.47	44.38
[K].SAAQAAAQTNSNAAGKQLR.[K]	1xBiotin [K16]	4	2	Q8NC51-1	Q8NC51-1 [53-71]	Q8NC51-1 1xBiotin [K68]	Plasminogen activator inhibitor 1 RNA-binding protein [OS=Homo sapiens]	1	2084.03	1.588	67.4	132.6	67.8	96	76.5	150.6	152.5	56.5	2963.73	4196.47	3342.92	6582.21	6664.62	2468.82				6582.21	3971.88		Not Found	Not Found	Not Found	High	Peak Found	Not Found	High	0.0008826	0.001662	2.54	29.63
[R].TFIAIKPDGVQR.[G]	1xBiotin [K6]	4	1	P15531	P15531 [7-18]	P15531 1xBiotin [K12]	Nucleoside diphosphate kinase A [OS=Homo sapiens]	0	1570.84	1.588	77.4	122.6	62.1	69.3	91.3	168.9	98.6	109.8	3389.57	3784.1	4986.37	9222.86	5381.75	5993.05				9222.86	3207.34	2260.85	Not Found	Not Found	Not Found	High	Peak Found	Peak Found	High	0.0009289	0.007214	2.56	44.74
[R].TKSTGGAPTFNVTVTK.[T]	1xBiotin [K2]	1	2	P07737	P07737 [90-105]	P07737 1xBiotin [K91]	profilin-1 [OS=Homo sapiens]	1	1834.94	1.579	77.6	122.4	81	67.3	69.3	209.7	109.4	63.5	5434.91	4514.06	4648.19	14071.4	7339.33	4262.28				14071.4	4373.99		Not Found	Not Found	Not Found	High	High	Not Found	High	0.0008826	0.000612	2.9	38.89
[K].SGVKIHVSDQELQSANASVDDSR.[L]	1xBiotin [K4]	2	2	P22314	P22314 [803-825]	P22314 1xBiotin [K806]	Ubiquitin-like modifier-activating enzyme 1 [OS=Homo sapiens]	1	2668.26	1.567	71	129	59.5	75.4	91.9	137	144	92.2	3206.43	4061.39	4950.9	7378.11	7759.59	4964.34				7378.11	4624.45		Not Found	Not Found	Not Found	High	High	Not Found	High	0.0008826	1.896e-06	4.68	38.89
[R].APFDLFENKK.[K]	1xBiotin [K9]	2	3	P08238	P08238 [339-348]	P08238 1xBiotin [K347]	Heat shock protein HSP 90-beta [OS=Homo sapiens]	1	1434.71	1.545	78.6	121.4	88.4	51.6	68.9	210.1	106.4	74.7	5307.16	3096.59	4135.37	12616.3	6390.97	4483.58				12616.3	3808.79		Not Found	Not Found	Not Found	High	High	Not Found	High	0.0008826	0.002075	2.61	50.99
[R].KVQSGNINAAK.[IT]	1xBiotin [K1]	2	2	P49368-1	P49368-1 [21-31]	P49368-1 1xBiotin [K21]	T-complex protein 1 subunit gamma [OS=Homo sapiens]	1	1355.71	1.543	78.7	121.3	49.1	79.2	86	215.5	122.1	48.1	2807.12	4526.2	4917.17	12318.3	6982.88	2750.35				12318.3	4161.55		Not Found	Not Found	Not Found	High	High	Not Found	High	0.0009289	0.003928	2.15	23.59
[R].EDYKFHHTFSTEIAK.[F]	1xBiotin [K4]	1	1	P13667	P13667 [332-346]	P13667 1xBiotin [K335]	Protein disulfide-isomerase A4 [OS=Homo sapiens]	1	2078.96	1.542	108.2	91.8	51.2	110.5	95.4	182.9	81	79	2171.29	4682.14	4043.69	7750.97	3430.65	3348.3				7750.97			Not Found	Not Found	Not Found	High	Not Found	Not Found	High	0.00223	0.0306	1.95	38.33
[R].GTKVILHLK.[E]	1xBiotin [K3]	5	4	P07900; P08238	P07900 [183-191]; P08238 [178-186]	P07900 1xBiotin [K185]; P08238 1xBiotin [K180]	Heat shock protein HSP 90-alpha [OS=Homo sapiens] Heat shock protein HSP 90-beta [OS=Homo sapiens]	1	1234.73	1.52	79.4	120.6	97.9	67.6	63.8	183.9	102.8	83.9	91907.9	63489.2	59886.8	172672	96501.1	78788	19820.8	15607.1	15556.2	172672	57511.3	29722.4	Peak Found	Peak Found	Peak Found	High	High	High	High	0.0008826	0.00236	2.63	38.26
[K].SQGKVLQATVVAVGSGSK.[G]	1xBiotin [K4]	1	1	P61604	P61604 [37-54]	P61604 1xBiotin [K40]	10 kDa heat shock protein, mitochondrial [OS=Homo sapiens]	1	1942.04	1.519	93.8	106.2	51.6	102.6	83.6	189.3	94.6	78.3	2621.53	5216.55	4250.47	9627.81	4809.13	3982.54				9627.81			Not Found	Not Found	Not Found	High	Not Found	Not Found	High	0.0008826	5.527e-05	3.11	42.88
[-].MAGITTIEAVKR.[K]	1xBiotin [K11]; 1xMet-loss+Acetyl [N-Term]	5	1	P06753-2	P06753-2 [1-12]	P06753-2 1xBiotin [K11]; 1xMet-loss+Acetyl [N-Term]	Isoform 2 of Tropomyosin alpha-3 chain [OS=Homo sapiens]	1	1426.77	1.518	79.4	120.6	71.7	94.3	61.1	197.3	108.8	66.7	3334.08	4384.5	2838.76	9174.01	5060.02	3102.48				9174.01	3015.6		Not Found	Not Found	Not Found	High	Peak Found	Not Found	High	0.0009289	0.007862	2.74	51.23
[K].NLQTKNPNYIR.[C]	1xBiotin [K5]	2	1	O43795	O43795 [584-594]	O43795 1xBiotin [K588]	Unconventional myosin-Ib [OS=Homo sapiens]	1	1586.81	1.509	79.7	120.3	44.8	171.6	66.8	133.7	100.8	82.4	2887.2	11072.6	4307.42	8622.46	6500.41	5315.83		2721.9		8622.46	3874.02		Not Found	Peak Found	Not Found	High	Peak Found	Not Found	High	0.0008826	0.001413	2.31	35.89
[R].LKTDNAGDQHGGGGGGGGGAGAAGGGGGGENYDDPHK.[T]	1xBiotin [K2]	1	1	P14866	P14866 [61-97]	P14866 1xBiotin [K62]	Heterogeneous nuclear ribonucleoprotein L [OS=Homo sapiens]	1	3448.46	1.506	79.8	120.2	29.6	65	67.7	314	26.1	97.8	2566.49	5638.14	5872.75	27253.4	2261.54	8491.48				27253.4		3203.37	Not Found	Not Found	Not Found	High	Not Found	Peak Found	High	0.0008826	9.152e-05	4.54	23.76
[K].VHLVGIDIFTGKK.[Y]	1xBiotin [K12]	4	2	Q6IS14	Q6IS14 [56-68]	Q6IS14 1xBiotin [K67]	Eukaryotic translation initiation factor 5A-1-like [OS=Homo sapiens]	1	1652.92	1.5	89.3	110.7	106.4	89.3	33.4	159.6	110.7	100.5	15595.7	13089.4	4901.92	23396.7	16233	14734.4	3363.36	3217.69		23396.7	9674.32	5558.5	Peak Found	Peak Found	Not Found	High	Peak Found	Peak Found	High	0.0008826	3.811e-05	2.81	51.32
[K].KEELTLEGIR.[Q]	1xBiotin [K1]	2	2	P60842	P60842 [238-247]	P60842 1xBiotin [K238]	Eukaryotic initiation factor 4A-I [OS=Homo sapiens]	1	1413.74	1.5	80	120	108.1	66	71.6	144.4	102.4	107.4	4650.57	2840.07	3081.7	6214.01	4403.33	4621.48				6214.01	2624.23		Not Found	Not Found	Not Found	High	High	Not Found	High	0.0009289	0.004239	1.99	44.54
[K].NKTGAAPIIDVVR.[S]	1xBiotin [K2]	1	2	P46776	P46776 [93-105]	P46776 1xBiotin [K94]	60S ribosomal protein L27a [OS=Homo sapiens]	1	1579.86	1.498	80.1	119.9	61.4	51	77.2	276.5	41.9	92	3411.02	2832.88	4285.64	15352.3	2325.65	5108.49				15352.3			Not Found	Not Found	Not Found	High	High	Not Found	High	0.002374	0.03854	1.87	44.58
[R].AAPGAEFAPNKR.[R]	1xBiotin [K11]	2	1	Q15233	Q15233 [457-468]	Q15233 1xBiotin [K467]	Non-POU domain-containing octamer-binding protein [OS=Homo sapiens]	1	1454.72	1.497	80.1	119.9	110.7	65	66.9	168.6	100.2	88.5	4978.85	2921.35	3010.16	7583.6	4507.38	3980.12				7583.6	2686.24		Not Found	Not Found	Not Found	High	Peak Found	Not Found	High	0.0009289	0.00588	2.35	34.86
[K].KIKDPDASKPEDWDER.[A]	1xBiotin [K1]	1	2	P27797	P27797 [207-222]	P27797 1xBiotin [K207]	Calreticulin [OS=Homo sapiens]	2	2155.01	1.497	80.1	119.9	110.2	58.2	67.9	199.2	101.6	62.8	5533.09	2921.69	3407.47	10001.4	5101.17	3155.03				10001.4			Not Found	Not Found	Not Found	High	Not Found	Not Found	High	0.0008826	0.0002333	3.16	30.6
[K].NFGIGQDIQPKR.[D]	1xBiotin [K11]	1	1	P62424	P62424 [38-49]	P62424 1xBiotin [K48]	60S ribosomal protein L7a [OS=Homo sapiens]	1	1598.81	1.468	81	119	78.9	85	86.7	124.8	76.8	147.7	3016.76	3249.27	3313.78	4770.76	2937.41	5647.32				4770.76			Not Found	Not Found	Not Found	High	Not Found	Not Found	High	0.0009289	0.0126	2.67	41.5
[-].MSKSFQQSSLSR.[D]	1xBiotin [K3]; 1xMet-loss+Acetyl [N-Term]	1	1	P43243	P43243 [1-12]	P43243 1xBiotin [K3]; 1xMet-loss+Acetyl [N-Term]	Matrin-3 [OS=Homo sapiens]	1	1522.73	1.468	84.6	115.4	100.7	57.1	84.5	158.5	115.4	83.8	5045.04	2859.5	4235.83	7944.42	5781.6	4198.18				7944.42			Not Found	Not Found	Not Found	High	Not Found	Not Found	High	0.002374	0.03514	2.39	38.66
[R].TKAGDLR.[D]	1xBiotin [K2]	2	1	P12956	P12956 [188-194]	P12956 1xBiotin [K189]	X-ray repair cross-complementing protein 6 [OS=Homo sapiens]	1	986.509	1.466	81.1	118.9	72.2	68.7	67.7	197.7	100.7	93	4361.72	4147.87	4088.25	11943.2	6080.77	5619.24				11943.2	3623.93		Not Found	Not Found	Not Found	High	Peak Found	Not Found	High	0.002374	0.0432	1.78	26.6
[R].VEYAKSGR.[A]	1xBiotin [K5]	1	1	P09874	P09874 [11-18]	P09874 1xBiotin [K15]	Poly [ADP-ribose] polymerase 1 [OS=Homo sapiens]	1	1135.56	1.462	85.9	114.1	70.9	58.8	73	217.2	94.1	85.9	4764.29	3950.75	4907.37	14596.2	6322.32	5774.07				14596.2	3767.88	2178.24	Not Found	Not Found	Not Found	High	Peak Found	Peak Found	High	0.003389	0.05821	1.88	26.54
[R].GWLKSNVSDAVAQSTR.[I]	1xBiotin [K4]	3	2	P60174-1	P60174-1 [191-206]	P60174-1 1xBiotin [K194]	Isoform 2 of Triosephosphate isomerase [OS=Homo sapiens]	1	1944.96	1.449	81.7	118.3	94.5	68.4	50.6	248.7	99.1	38.7	4954.58	3583.47	2652.64	13031.5	5191.22	2030.09				13031.5			Not Found	Not Found	Not Found	High	Not Found	Not Found	High	0.0008826	1.638e-05	3.42	47.6
[K].SPQVKPASTMGMGPLGKGAGPVPPGK.[V]	1xBiotin [K17]; 2xOxidation [M10; M12]	8	5	Q13428-1	Q13428-1 [503-528]	Q13428-1 1xBiotin [K519]	Treacle protein [OS=Homo sapiens]	1	2704.36	1.435	90.1	109.9	113.8	103.9	15.7	76.4	126.7	163.4	19024.4	17373.8	2619.11	12774	21183.5	27306.9	4102.8	4270.88		12774	12624.7	10301.4	Peak Found	Peak Found	Not Found	High	High	High	High	0.0009289	0.004752	4.06	34.06
[R].ETGSSKGFGFVDFNSEEDAK.[A]	1xBiotin [K6]	1	2	P19338	P19338 [605-624]	P19338 1xBiotin [K610]	Nucleolin [OS=Homo sapiens]	1	2377.03	1.431	82.3	117.7	66.7	81.3	47	250.8	95.5	58.7	3563.48	4342.09	2508.31	13392.3	5100.28	3131.75				13392.3			Not Found	Not Found	Not Found	High	Not Found	Not Found	High	0.00223	0.02493	2.04	50.45
[R].TKNISAISYINQR.[N]	1xBiotin [K2]	1	4	Q92541	Q92541 [554-566]	Q92541 1xBiotin [K555]	RNA polymerase-associated protein RTF1 homolog [OS=Homo sapiens]	1	1733.9	1.428	84.6	115.4	20	108.7	107	63.1	155.3	145.9	2445.67	13277.2	13066.6	7710.16	18963.2	17815.8		3263.85	3394.17	7710.16	11301.4	6720.94	Not Found	Peak Found	High	High	High	High	High	0.0008826	0.0006926	1.97	43.76
[K].IILDLISESPIKGR.[A]	1xBiotin [K12]	3	1	P61978	P61978 [208-221]	P61978 1xBiotin [K219]	Heterogeneous nuclear ribonucleoprotein K [OS=Homo sapiens]	1	1780	1.427	89.2	110.8	59	99.5	89.7	142.1	98.3	111.4	3100.82	5233.94	4719.73	7470.77	5170.65	5858.89				7470.77			Not Found	Not Found	Not Found	High	Not Found	Not Found	High	0.0009289	0.006776	2.66	56
[R].EKIETELR.[D]	1xBiotin [K2]	1	1	P63104-1	P63104-1 [84-91]	P63104-1 1xBiotin [K85]	14-3-3 protein zeta/delta [OS=Homo sapiens]	1	1243.64	1.426	73.2	126.8	104.7	63.9	71.4	145.2	123.7	91.2	4726.71	2886.22	3221.29	6553.93	5583.28	4116.09				6553.93	3327.44		Not Found	Not Found	Not Found	High	Peak Found	Not Found	High	0.002374	0.04405	1.53	35.34
[K].LKGEATVSFDDPPSAK.[A]	1xBiotin [K2]	2	1	P35637-1	P35637-1 [333-348]	P35637-1 1xBiotin [K334]	RNA-binding protein FUS [OS=Homo sapiens]	1	1887.92	1.426	92.8	107.2	54.5	104	93	163.5	77.6	107.4	2906.14	5550.26	4964.98	8726.24	4143.81	5730.47				8726.24	2469.57		Not Found	Not Found	Not Found	High	Peak Found	Not Found	High	0.0008826	0.002484	2.49	39.61
[-].MPEPTKSAPAPK.[K]	1xBiotin [K6]; 1xMet-loss [N-Term]	1	1	P58876	P58876 [1-12]	P58876 1xBiotin [K6]; 1xMet-loss [N-Term]	Histone H2B type 1-D [OS=Homo sapiens]	1	1348.69	1.423	69	131	79.5	107.3	60.7	152.7	150.8	49	3325.64	4490.89	2540.49	6389.24	6310.04	2050.2				6389.24	3760.56		Not Found	Not Found	Not Found	High	Peak Found	Not Found	High	0.0009289	0.003227	3.26	26.17
[K].HGEAQVKIWR.[R]	1xBiotin [K7]	2	1	P18669	P18669 [107-116]	P18669 1xBiotin [K113]	Phosphoglycerate mutase 1 [OS=Homo sapiens]	1	1449.74	1.422	82.6	117.4	66.3	65.3	81.6	202.9	89.5	94.3	3854.02	3793.39	4744.37	11792.4	5201.36	5479.92				11792.4	3099.83	2067.27	Not Found	Not Found	Not Found	High	Peak Found	Peak Found	High	0.0009289	0.01463	2.65	36.61
[R].LSVDYGKK.[S]	1xBiotin [K]	8	7	P68363	P68363 [157-164]	P68363 1xBiotin [K]	Tubulin alpha-1B chain [OS=Homo sapiens]	1	1135.58	1.418	82.7	117.3	92.5	76.4	82.3	138	116.6	94.2	46843.6	38720.8	41676.3	69921.1	59090.9	47698.6	10102.3	9518.46	10825.8	69921.1	35216.1	17994.1	High	High	High	High	High	High	High	0.0009289	0.01146	1.92	34.13
[K].EKALQFLEEVK.[V]	1xBiotin [K2]	2	1	P40227-1	P40227-1 [128-138]	P40227-1 1xBiotin [K129]	T-complex protein 1 subunit zeta [OS=Homo sapiens]	1	1559.81	1.416	82.8	117.2	76.5	86.3	67.3	176.7	85	108.3	4104.86	4630.85	3611.96	9483.41	4562.5	5812.9				9483.41			Not Found	Not Found	Not Found	High	Not Found	Not Found	High	0.0008826	0.002698	1.91	53.97
[R].LGLELGKVVTK.[K]	1xBiotin [K7]	4	1	P11908	P11908 [23-33]	P11908 1xBiotin [K29]	ribose-phosphate pyrophosphokinase 2 [OS=Homo sapiens]	1	1382.81	1.416	86	114	107.8	74.2	67.5	156.8	98.3	95.5	5865.86	4033.47	3669.11	8526.68	5345.24	5194.88				8526.68	3185.58	1959.75	Not Found	Not Found	Not Found	High	Peak Found	Peak Found	High	0.0008826	0.0002123	2.41	47.72
[R].GALQNIIPASTGAAKAVGK.[V]	1xBiotin [K15]	2	4	P04406-1	P04406-1 [201-219]	P04406-1 1xBiotin [K215]	glyceraldehyde-3-phosphate dehydrogenase [OS=Homo sapiens]	1	1993.09	1.411	83	117	127.7	71.8	63.3	182.5	101.3	53.5	29446	16552.8	14592.1	42087.1	23354.7	12341.3	6350.32	4069.05	3790.45	42087.1	13918.6	4655.7	Peak Found	Peak Found	Peak Found	High	Peak Found	Peak Found	High	0.0008826	0.000909	3.41	46.74
[R].LNQLKPGLQYK.[L]	1xBiotin [K5]	7	1	Q12906-1	Q12906-1 [409-419]	Q12906-1 1xBiotin [K413]	Interleukin enhancer-binding factor 3 [OS=Homo sapiens]	0	1527.84	1.409	83	117	80.1	59.1	78	199.5	109.9	73.5	4180.4	3085.16	4073.27	10417.2	5738.55	3837.3				10417.2			Not Found	Not Found	Not Found	High	Not Found	Not Found	High	0.0009289	0.0106	2.19	40.25
[R].SGSISVKIIR.[H]	1xBiotin [K7]	1	3	Q8TF01	Q8TF01 [724-733]	Q8TF01 1xBiotin [K730]	Arginine/serine-rich protein PNISR [OS=Homo sapiens]	1	1285.73	1.386	83.8	116.2	104.4	24.4	93.2	106.6	129.2	142.1	12416	2897.97	11084.5	12677.4	15360.3	16900.1	2677.64		2879.31	12677.4	9154.22	6375.47	Peak Found	Not Found	Peak Found	High	High	High	High	0.0009289	0.004081	2.71	42.18
[R].VTIMPKDIQLAR.[R]	1xBiotin [K6]; 1xOxidation [M4]	5	1	P84243	P84243 [118-129]	P84243 1xBiotin [K123]	histone H3.3 [OS=Homo sapiens]	1	1626.87	1.383	83.9	116.1	80.3	36.7	81.1	241.4	111.1	49.4	5193.45	2375.32	5245.62	15615.7	7183.19	3193.73				15615.7	4280.93		Not Found	Not Found	Not Found	High	Peak Found	Not Found	High	0.0009289	0.002884	2.04	44.25
[K].IYKIGQGYLIK.[D]	1xBiotin [K3]	1	1	P39023	P39023 [284-294]	P39023 1xBiotin [K286]	60S ribosomal protein L3 [OS=Homo sapiens]	1	1521.85	1.383	83.9	116.1	85.2	106.2	60.4	117.8	91.7	138.7	3557.54	4432.01	2521.05	4918.35	3827.64	5790.57				4918.35	2281.14		Not Found	Not Found	Not Found	High	Peak Found	Not Found	High	0.002374	0.0345	2.29	48
[K].LKEENFFGPK.[E]	1xBiotin [K2]	2	1	Q9NZI8	Q9NZI8 [474-483]	Q9NZI8 1xBiotin [K475]	Insulin-like growth factor 2 mRNA-binding protein 1 [OS=Homo sapiens]	1	1434.71	1.379	99.7	100.3	119.9	98.5	49.1	165.3	99.2	68.1	5799.33	4766.02	2374.39	7999.28	4799.16	3292.88				7999.28			Not Found	Not Found	Not Found	High	Not Found	Not Found	High	0.0008826	0.001938	2.31	43.81
[K].TGLKELPMR.[N]	1xBiotin [K4]	4	1	P00533-1	P00533-1 [130-138]	P00533-1 1xBiotin [K133]	epidermal growth factor receptor [OS=Homo sapiens]	1	1270.66	1.379	84.1	115.9	59.6	85.6	92.7	201.9	118	42.1	2953.51	4237.58	4590.06	9996.74	5844.94	2086.65				9996.74	3483.38		Not Found	Not Found	Not Found	High	Peak Found	Not Found	High	0.0009289	0.006544	2.08	42.04
[K].SVNELIYKR.[G]	1xBiotin [K8]	1	1	P18124	P18124 [149-157]	P18124 1xBiotin [K156]	60S ribosomal protein L7 [OS=Homo sapiens]	1	1347.71	1.378	84.1	115.9	63.5	103.7	81.2	178.8	61.1	111.8	2298.72	3755.03	2938.36	6471.78	2211.63	4047.77				6471.78			Not Found	Not Found	Not Found	High	Not Found	Not Found	High	0.0009289	0.009193	2.81	41.62
[K].AMEAVAAQGKAK.[K-]	1xBiotin [K10]; 1xOxidation [M2]	2	2	P18669	P18669 [242-253]	P18669 1xBiotin [K251]	Phosphoglycerate mutase 1 [OS=Homo sapiens]	1	1416.7	1.377	84.1	115.9	88.3	93.8	66.5	141.9	121.6	87.9	2863.37	3041.89	2155.21	4599.91	3942.3	2849.21				4599.91	2349.47		Not Found	Not Found	Not Found	High	High	Not Found	High	0.00223	0.02658	2.34	24.44
[R].KACQIFVR.[N]	1xBiotin [K1]; 1xCarbamidomethyl [C3]	2	1	P52272	P52272 [651-658]	P52272 1xBiotin [K651]	Heterogeneous nuclear ribonucleoprotein M [OS=Homo sapiens]	1	1247.64	1.374	84.2	115.8	83.8	102.4	71.7	140.6	115.3	86.2	4827.33	5897.11	4132.7	8100.52	6641.84	4967.84				8100.52	3958.31	1874.1	Not Found	Not Found	Not Found	High	Peak Found	Peak Found	High	0.0009289	0.01079	1.76	37.59
[R].GLFIIDDKGILR.[Q]	1xBiotin [K8]	2	2	Q06830	Q06830 [129-140]	Q06830 1xBiotin [K136]	peroxiredoxin-1 [OS=Homo sapiens]	1	1585.88	1.374	59.6	140.4	125.5	53.6	58	152.7	136.6	73.6	5394.49	2304.12	2492	6566.07	5870.89	3164.75				6566.07			Not Found	Not Found	Not Found	High	High	Not Found	High	0.0008826	0.0007239	2.2	58.26
[K].KYAEAVTR.[A]	1xBiotin [K1]	2	1	P00558	P00558 [323-330]	P00558 1xBiotin [K323]	phosphoglycerate kinase 1 [OS=Homo sapiens]	1	1163.59	1.372	84.3	115.7	89.5	74.8	94.8	165.9	122.9	52.1	4824.88	4029.89	5109.2	8938.92	6619.4	2805.54				8938.92	3944.93		Not Found	Not Found	Not Found	High	Peak Found	Not Found	High	0.0009289	0.01016	1.71	28.33
[R].KGVAINMVTEEDKR.[T]	1xBiotin [K1]	1	1	P60842	P60842 [369-382]	P60842 1xBiotin [K369]	Eukaryotic initiation factor 4A-I [OS=Homo sapiens]	2	1815.91	1.37	84.4	115.6	65.8	88.1	72.1	203	72.2	98.8	3707.32	4965.86	4066.54	11443	4071.48	5572.42				11443			Not Found	Not Found	Not Found	High	Not Found	Not Found	High	0.0008826	0.0009049	3.27	37.77
[R].KAGNFYVPAEPK.[L]	1xBiotin [K1]	1	1	P18124	P18124 [77-88]	P18124 1xBiotin [K77]	60S ribosomal protein L7 [OS=Homo sapiens]	1	1546.77	1.356	84.9	115.1	56	78.6	70.9	239	96.2	59.4	2692.38	3781.29	3409.81	11491.6	4624.37	2854.82				11491.6	2755.97		Not Found	Not Found	Not Found	High	Peak Found	Not Found	High	0.0008826	0.0001129	3.44	39.06
[K].KQMADTGK.[L]	1xBiotin [K1]	2	1	Q00839	Q00839 [544-551]	Q00839 1xBiotin [K544]	Heterogeneous nuclear ribonucleoprotein U [OS=Homo sapiens]	1	1104.52	1.356	84.9	115.1	102.5	68.6	83.4	129.8	102.6	113	4998.71	3344.98	4066.28	6332.42	5005.47	5513.02				6332.42			Not Found	Not Found	Not Found	High	Not Found	Not Found	High	0.002658	0.04708	1.67	22.42
[K].VYVGNLGTGAGKGELER.[A]	1xBiotin [K12]	4	1	Q16629	Q16629 [13-29]	Q16629 1xBiotin [K24]	serine/arginine-rich splicing factor 7 [OS=Homo sapiens]	1	1945.98	1.354	85	115	98.3	76.8	87.8	174.2	44	118.9	4591.46	3585.89	4100.01	8133.39	2054.3	5552.61				8133.39			Not Found	Not Found	Not Found	High	Not Found	Not Found	High	0.0008826	0.0003818	3.51	41.77
[K].GEHSIVYLKPSYAFGSVGK.[E]	1xBiotin [K9]	1	1	Q02790	Q02790 [214-232]	Q02790 1xBiotin [K222]	Peptidyl-prolyl cis-trans isomerase FKBP4 [OS=Homo sapiens]	0	2265.14	1.349	78.7	121.3	90.3	104.4	61	139.2	64.2	140.9	3604.66	4167.9	2435.14	5555.84	2561.57	5623.94				5555.84			Not Found	Not Found	Not Found	High	Not Found	Not Found	High	0.0008826	0.001803	3.34	49.63
[R].TKDIEDVFYK.[Y]	1xBiotin [K2]	3	1	Q07955-1	Q07955-1 [29-38]	Q07955-1 1xBiotin [K30]	Serine/arginine-rich splicing factor 1 [OS=Homo sapiens]	1	1483.71	1.349	86.4	113.6	73	88.6	80	154.5	105.3	98.5	3323.76	4031.33	3642.64	7029.2	4792.95	4483.7				7029.2	2856.43		Not Found	Not Found	Not Found	High	Peak Found	Not Found	High	0.0009289	0.005455	2.19	48.21
[K].KPPLLNNADSVQAK.[V]	1xBiotin [K1]	1	2	P09874	P09874 [748-761]	P09874 1xBiotin [K748]	Poly [ADP-ribose] polymerase 1 [OS=Homo sapiens]	0	1720.91	1.342	85.4	114.6	96.7	67.7	71.7	202.6	96.2	65.2	4930.99	3452.42	3655.09	10330.2	4905.07	3324.86				10330.2	2923.25		Not Found	Not Found	Not Found	High	High	Not Found	High	0.0008826	0.001827	3.53	38.39
[K].VLQATVVAVGSGSKGK.[G]	1xBiotin [K14]	1	3	P61604	P61604 [41-56]	P61604 1xBiotin [K54]	10 kDa heat shock protein, mitochondrial [OS=Homo sapiens]	1	1726.95	1.339	85.5	114.5	82.2	83.5	92.2	170.9	111.8	59.3	11232.5	11402.5	12598.6	23346.1	15267.7	8096.68	2422.39	2803	3272.61	23346.1	9099.02	3054.44	Peak Found	Peak Found	Peak Found	High	High	Peak Found	High	0.0008826	0.0005831	3.39	37.88
[K].FEKEAAEMGK.[G]	1xBiotin [K3]; 1xOxidation [M8]	4	1	P68104	P68104 [42-51]	P68104 1xBiotin [K44]	Elongation factor 1-alpha 1 [OS=Homo sapiens]	1	1381.61	1.337	85.6	114.4	50.5	88.3	106.7	122.7	118.1	113.7	2734.28	4785.72	5779.98	6647.01	6398.29	6159.54				6647.01	3813.16	2323.66	Not Found	Not Found	Not Found	High	Peak Found	Peak Found	High	0.0008826	0.001766	2.47	29.29
[K].KVHVIFNYK.[G]	1xBiotin [K1]	1	1	P27797	P27797 [143-151]	P27797 1xBiotin [K143]	Calreticulin [OS=Homo sapiens]	1	1373.74	1.336	85.6	114.4	57	87.8	96.8	192.4	117.3	48.6	2688.5	4144.71	4568.04	9078.2	5535.9	2292.64				9078.2			Not Found	Not Found	Not Found	High	Not Found	Not Found	High	0.0008826	0.001278	2.17	38.89
[K].EKLIAPVAEEEATVPNNK.[I]	1xBiotin [K2]	1	1	P07195	P07195 [6-23]	P07195 1xBiotin [K7]	L-lactate dehydrogenase B chain [OS=Homo sapiens]	1	2178.11	1.328	95.1	104.9	97	88.3	60.7	176.1	97.3	80.6	5180.92	4715.3	3244.35	9403.65	5196.08	4306.95				9403.65	3096.68		Not Found	Not Found	Not Found	High	Peak Found	Not Found	High	0.0009289	0.009552	2.94	43.43
[R].NNELIAVGKGSSLK.[R]	1xBiotin [K9]	1	1	O00622	O00622 [195-208]	O00622 1xBiotin [K203]	Protein CYR61 [OS=Homo sapiens]	1	1655.88	1.324	86.1	113.9	103.4	90.3	44.6	135.6	106.5	119.6	5067.32	4424.84	2186.53	6647.17	5219.37	5858.9				6647.17	3110.56		Not Found	Not Found	Not Found	High	Peak Found	Not Found	High	0.0009289	0.006185	2.82	42.31
[R].AAKLAPEFAK.[R]	1xBiotin [K3]	1	1	P30041	P30041 [54-63]	P30041 1xBiotin [K56]	Peroxiredoxin-6 [OS=Homo sapiens]	1	1271.68	1.323	86.1	113.9	54.8	62.4	99.6	245.3	82.6	55.3	2662.9	3030.75	4834.92	11912.3	4008.71	2683.28				11912.3			Not Found	Not Found	Not Found	High	Not Found	Not Found	High	0.002374	0.03692	2.07	39.35
[-].MAKAAAIGIDLGTTYSCVGVFQHGK.[V]	1xBiotin [K3]; 1xCarbamidomethyl [C17]; 1xMet-loss+Acetyl [N-Term]	2	1	P0DMV8	P0DMV8 [1-25]	P0DMV8 1xBiotin [K3]; 1xMet-loss+Acetyl [N-Term]	heat shock 70 kDa protein 1A [OS=Homo sapiens]	1	2732.35	1.32	86.2	113.8	81.9	58.8	60.6	45.8	272.9	80	4194.78	3010.86	3105.14	2345.45	13976.3	4097.38				2345.45	8329.36		Not Found	Not Found	Not Found	Peak Found	High	Not Found	High	0.0009289	0.003321	3.56	60.37
[K].KGESQTDIEITR.[E]	1xBiotin [K1]	2	2	P49368-1	P49368-1 [249-260]	P49368-1 1xBiotin [K249]	T-complex protein 1 subunit gamma [OS=Homo sapiens]	1	1602.78	1.313	86.5	113.5	91.7	63.6	73.4	238.2	96.4	36.7	5895.52	4091.18	4720.46	15317.9	6197.86	2358.92				15317.9	3693.71		Not Found	Not Found	Not Found	High	High	Not Found	High	0.0008826	0.0001169	3.27	33.31
[R].LKVTEGGEPYR.[L]	1xBiotin [K2]	2	1	Q14697-1	Q14697-1 [268-278]	Q14697-1 1xBiotin [K269]	Neutral alpha-glucosidase AB [OS=Homo sapiens]	1	1474.74	1.306	80.5	119.5	139.3	65	55.6	182	96.6	61.5	5887.42	2749	2348.96	7691.44	4083.8	2600.74				7691.44	2433.8		Not Found	Not Found	Not Found	High	Peak Found	Not Found	High	0.002374	0.03967	2.06	33.77
[-].MAWKSGGASHSELIHNLR.[K]	1xBiotin [K4]; 1xMet-loss+Acetyl [N-Term]	2	1	P22061	P22061 [1-18]	P22061 1xBiotin [K4]; 1xMet-loss+Acetyl [N-Term]	protein-L-isoaspartate(D-aspartate) O-methyltransferase [OS=Homo sapiens]	1	2131.05	1.303	86.8	113.2	86.4	97	54.2	201.7	112.6	48.1	4391.93	4932.96	2754.22	10257.4	5723.47	2445.48				10257.4	3410.99		Not Found	Not Found	Not Found	High	Peak Found	Not Found	High	0.0008826	0.002486	2.36	43.8
[R].GIYAYGFEKPSAIQQR.[A]	1xBiotin [K9]	5	2	P60842	P60842 [46-61]	P60842 1xBiotin [K54]	Eukaryotic initiation factor 4A-I [OS=Homo sapiens]	0	2054.02	1.288	87.4	112.6	114.3	63	86.1	177	48.7	110.9	5704.82	3144.04	4298.12	8833.86	2428.52	5536.9				8833.86			Not Found	Not Found	Not Found	High	High	Not Found	High	0.0008826	0.002429	2.69	48.15
[K].NLYIISVKGIK.[G]	1xBiotin [K]	1	2	P62829	P62829 [36-46]	P62829 1xBiotin [K]	60S ribosomal protein L23 [OS=Homo sapiens]	1	1473.85	1.28	106.4	93.6	50.4	103.4	116.5	149.1	89.6	90.9	2551.74	5231.13	5893.05	7543.7	4531.22	4599.71				7543.7	2700.45		Not Found	Not Found	Not Found	High	High	Not Found	High	0.0009289	0.008945	2.41	52.46
[-].MAAKVFESIGK.[F]	1xBiotin [K4]; 1xMet-loss+Acetyl [N-Term]	2	1	P35232	P35232 [1-11]	P35232 1xBiotin [K4]; 1xMet-loss+Acetyl [N-Term]	Prohibitin [OS=Homo sapiens]	1	1317.69	1.279	87.8	112.2	88.6	100.8	66.8	149.1	81.4	113.3	3079.6	3505.01	2322.14	5185.53	2830.77	3937.92				5185.53			Not Found	Not Found	Not Found	High	Not Found	Not Found	High	0.003241	0.04982	1.85	56.61
[K].KVEKVTISNR.[L]	1xBiotin [K4]	2	1	P08238	P08238 [574-583]	P08238 1xBiotin [K577]	Heat shock protein HSP 90-beta [OS=Homo sapiens]	2	1399.77	1.27	73.8	126.2	53.2	70.2	140.5	148.3	120.2	67.6	2138.39	2823.25	5646.13	5959.31	4832.74	2716.14				5959.31	2880.15		Not Found	Not Found	Not Found	High	Peak Found	Not Found	High	0.003389	0.05878	1.94	29.12
[K].MFIGGLSWDTTKK.[D]	1xBiotin [K12]; 1xOxidation [M1]	4	1	Q14103	Q14103 [99-111]	Q14103 1xBiotin [K110]	heterogeneous nuclear ribonucleoprotein D0 [OS=Homo sapiens]	1	1725.83	1.264	88.3	111.7	105.8	90.8	66.7	114.8	141.2	80.7	3725.13	3196.89	2347.22	4041.71	4971.97	2842.07				4041.71			Not Found	Not Found	Not Found	High	Not Found	Not Found	High	0.0009289	0.004932	2.09	49.36
[K].IGQGYLIKDGK.[L]	1xBiotin [K8]	1	1	P39023	P39023 [287-297]	P39023 1xBiotin [K294]	60S ribosomal protein L3 [OS=Homo sapiens]	1	1417.75	1.264	88.3	111.7	53	80.9	111	198.1	102.3	54.7	2517.19	3846	5276.59	9414.38	4862.13	2600.83				9414.38	2897.66		Not Found	Not Found	Not Found	High	Peak Found	Not Found	High	0.0008826	0.001732	1.93	39.67
[K].DGADFAKWR.[C]	1xBiotin [K7]	3	1	P04075	P04075 [141-149]	P04075 1xBiotin [K147]	fructose-bisphosphate aldolase A [OS=Homo sapiens]	1	1291.59	1.253	88.8	111.2	67.1	72.6	100.4	225	90.9	44.1	3816.21	4126.28	5707.42	12791.9	5170.61	2506.2				12791.9			Not Found	Not Found	Not Found	High	Not Found	Not Found	High	0.0009289	0.008917	2.62	44.52
[K].TKEAVLLLK.[K]	1xBiotin [K2]	1	1	P36578	P36578 [164-172]	P36578 1xBiotin [K165]	60S ribosomal protein L4 [OS=Homo sapiens]	1	1240.73	1.252	88.8	111.2	95.3	97.8	36.1	206.8	119.4	44.6	5470.6	5609.3	2072.22	11868	6849.21	2558.13				11868	4081.89		Not Found	Not Found	Not Found	High	Peak Found	Not Found	High	0.0009289	0.008652	2.3	46.26
[R].AGIKVTVAGLAGK.[D]	1xBiotin [K4]	1	1	Q99497	Q99497 [29-41]	Q99497 1xBiotin [K32]	protein/nucleic acid deglycase DJ-1 [OS=Homo sapiens]	1	1410.81	1.252	88.8	111.2	77.2	57.6	121.9	188.8	57.8	96.7	3049.68	2273.12	4810.57	7453.51	2282.04	3817.95				7453.51			Not Found	Not Found	Not Found	High	Not Found	Not Found	High	0.0008826	0.0003101	2.83	46.02
[R].GTAKANVGAGK.[K]	1xBiotin [K4]	4	1	P62847-4	P62847-4 [119-129]	P62847-4 1xBiotin [K122]	Isoform 4 of 40S ribosomal protein S24 [OS=Homo sapiens]	1	1199.62	1.251	95.5	104.5	74	62.2	101.4	203.7	77.8	81	3431.77	2884.69	4702.51	9447.38	3609.38	3757.82				9447.38	2151.07		Not Found	Not Found	Not Found	High	Peak Found	Not Found	High	0.0009289	0.0109	1.78	23.36
[R].NLLSVAYKNVVGAR.[R]	1xBiotin [K8]	5	1	P63104-1; Q04917	P63104-1 [42-55]; Q04917 [43-56]	P63104-1 1xBiotin [K49]; Q04917 1xBiotin [K50]	14-3-3 protein zeta/delta [OS=Homo sapiens] 14-3-3 protein eta [OS=Homo sapiens]	1	1729.94	1.251	98.6	101.4	108.7	103.3	62.5	141.2	78.2	106.1	5361.1	5094.23	3085.77	6965.68	3859.24	5236.64				6965.68	2299.97		Not Found	Not Found	Not Found	High	Peak Found	Not Found	High	0.0008826	0.0002393	3.03	55.11
[K].LKAEGSEIR.[L]	1xBiotin [K2]	1	1	P07237	P07237 [70-78]	P07237 1xBiotin [K71]	Protein disulfide-isomerase [OS=Homo sapiens]	1	1228.64	1.247	89	111	108.2	93.5	54.1	171.7	116.6	55.8	5624.18	4859.09	2809.99	8923.9	6060.37	2899.96				8923.9	3611.77		Not Found	Not Found	Not Found	Peak Found	High	Not Found	High	0.003241	0.04883	1.62	29.31
[K].DISTNYYASQKK.[T]	1xBiotin [K12]	1	1	P14625	P14625 [672-683]	P14625 1xBiotin [K683]	Endoplasmin [OS=Homo sapiens]	1	1643.77	1.246	89	111	83.8	88.6	82.2	147.7	104.5	93.3	5150.31	5443.13	5047.39	9071.06	6417.59	5729.38				9071.06	3824.66		Not Found	Not Found	Not Found	High	Peak Found	Not Found	High	0.0008826	0.002451	3.17	35.26
[K].IGHPAPNFKATAVMPDGQFK.[D]	1xBiotin [K9]	1	1	Q06830	Q06830 [8-27]	Q06830 1xBiotin [K16]	peroxiredoxin-1 [OS=Homo sapiens]	1	2352.16	1.243	89.2	110.8	83.5	65.2	66.5	256	82.6	46.2	4377.98	3418.45	3484.69	13415.7	4330	2419.74				13415.7			Not Found	Not Found	Not Found	High	Not Found	Not Found	High	0.0008826	0.001751	4.51	44.47
[R].IGKPAPDFK.[A]	1xBiotin [K3]	2	1	P32119	P32119 [8-16]	P32119 1xBiotin [K10]	Peroxiredoxin-2 [OS=Homo sapiens]	0	1198.63	1.24	106.6	93.4	94	48.7	138.5	171.8	82.3	64.7	3926.27	2033.87	5787.52	7176.87	3439.47	2705.16				7176.87			Not Found	Not Found	Not Found	High	Not Found	Not Found	High	0.0009289	0.004984	2.04	37.71
[K].IDLKFIDTTSK.[F]	1xBiotin [K4]	1	1	P39023	P39023 [363-373]	P39023 1xBiotin [K366]	60S ribosomal protein L3 [OS=Homo sapiens]	1	1506.79	1.236	92.4	107.6	63	122.2	84.4	151	81.2	98.2	2812.37	5451.08	3764.25	6735.14	3620.93	4381.65				6735.14			Not Found	Not Found	Not Found	High	Not Found	Not Found	High	0.0009289	0.01073	2.29	50.25
[R].KLDELYGTWR.[K]	1xBiotin [K1]	1	1	P36578	P36578 [259-268]	P36578 1xBiotin [K259]	60S ribosomal protein L4 [OS=Homo sapiens]	1	1506.74	1.223	89.9	110.1	73.1	99.2	79.2	203	96.9	48.7	3851.59	5228.25	4173.91	10703.3	5106.62	2565.22				10703.3			Not Found	Not Found	Not Found	High	Not Found	Not Found	High	0.0008826	0.002189	2.7	47.43
[K].TKEVYELLDSPGK.[V]	1xBiotin [K2]	2	1	P22234	P22234 [18-30]	P22234 1xBiotin [K19]	multifunctional protein ADE2 [OS=Homo sapiens]	1	1704.85	1.221	90.1	109.9	76	77.3	127.7	165.5	59.2	94.3	3064.39	3118.06	5153.37	6676.15	2389.49	3805.81				6676.15			Not Found	Not Found	Not Found	High	Not Found	Not Found	High	0.0008826	0.0001404	3.65	48.34
[R].VSAKNALESYAFNMK.[S]	1xBiotin [K4]	2	2	P0DMV8	P0DMV8 [536-550]	P0DMV8 1xBiotin [K539]	heat shock 70 kDa protein 1A [OS=Homo sapiens]	1	1898.91	1.217	55.2	144.8	176.3	37.7	37.6	214.5	98.9	35.1	23318.5	4983.32	4973.81	28374.9	13083.8	4642.21	5028.85			28374.9	7797.52		Peak Found	Not Found	Not Found	High	Peak Found	Not Found	High	0.0008826	0.001377	3.49	54.24
[K].KFAEAFEAIPR.[A]	1xBiotin [K1]	3	1	P50990	P50990 [440-450]	P50990 1xBiotin [K440]	T-complex protein 1 subunit theta [OS=Homo sapiens]	1	1504.76	1.214	90.3	109.7	90	83.2	76.7	203.7	45.3	101	4670.75	4321.63	3984.17	10575.7	2353.34	5245.75				10575.7			Not Found	Not Found	Not Found	High	Not Found	Not Found	High	0.0008826	2.382e-05	2.98	48.7
[K].DLPEHAVLKMK.[G]	1xBiotin [K9]	2	1	Q00839	Q00839 [627-637]	Q00839 1xBiotin [K635]	Heterogeneous nuclear ribonucleoprotein U [OS=Homo sapiens]	1	1506.78	1.204	74	126	42.7	48.1	173.4	208.8	45.1	81.9	2745.44	3087.52	11138.8	13410.7	2897.6	5261.56			2893.41	13410.7			Not Found	Not Found	Peak Found	High	Not Found	Not Found	High	0.0009289	0.00539	2.2	39.89
[R].TNSTFNQVVLKR.[L]	1xBiotin [K11]	2	2	Q07020	Q07020 [39-50]	Q07020 1xBiotin [K49]	60S ribosomal protein L18 [OS=Homo sapiens]	1	1632.85	1.204	111.3	88.7	100.9	97.4	61.2	189.4	77.6	73.6	5545.38	5351.62	3361.84	10410.4	4263.56	4046.48				10410.4			Not Found	Not Found	Not Found	High	High	Not Found	High	0.0008826	0.0009752	2.93	42.12
[K].STGGAPTFNVTVTKTDK.[T]	1xBiotin [K17]	1	2	P07737	P07737 [92-108]	P07737 1xBiotin [K108]	profilin-1 [OS=Homo sapiens]	1	1949.96	1.199	82	118	56.5	195	60.4	133.2	87	67.8	3678.99	12689.7	3932.05	8665.85	5660.38	4412.53		3119.43		8665.85	3373.39		Not Found	Peak Found	Not Found	High	High	Not Found	High	0.002077	0.02043	3.44	41.86
[R].SAAETVTKGGIMLPEK.[S]	1xBiotin [K8]; 1xOxidation [M12]	1	1	P61604	P61604 [21-36]	P61604 1xBiotin [K28]	10 kDa heat shock protein, mitochondrial [OS=Homo sapiens]	1	1873.94	1.194	113.8	86.2	108.4	50.4	127	151.7	80.3	82.2	4986.77	2317.82	5843.46	6976.42	3695.35	3779.93				6976.42	2202.3		Not Found	Not Found	Not Found	High	Peak Found	Not Found	High	0.0009289	0.01261	2.72	41.43
[K].VKIPVAIK.[E]	1xBiotin [K2]	1	1	P00533-1	P00533-1 [738-745]	P00533-1 1xBiotin [K739]	epidermal growth factor receptor [OS=Homo sapiens]	1	1093.68	1.18	117.2	82.8	106.1	32.2	72.7	299.6	51.4	38	11751.5	3571.48	8052.43	33189.7	5690.02	4214.95	2534.33		2091.7	33189.7			Peak Found	Not Found	Peak Found	High	Not Found	Not Found	High	0.0009289	0.008759	2.1	41.81
[K].VGINYQPPTVVPGGDLAKVQR.[A]	1xBiotin [K18]	12	1	P68363	P68363 [353-373]	P68363 1xBiotin [K370]	Tubulin alpha-1B chain [OS=Homo sapiens]	1	2434.29	1.175	81.6	118.4	95.6	52.2	123.4	138.7	144.9	45.2	4458.84	2432.86	5752.82	6469.03	6757.52	2109.85				6469.03	4027.25		Not Found	Not Found	Not Found	High	Peak Found	Not Found	High	0.0009289	0.008951	2.9	48.23
[K].SQQALVQKR.[H]	1xBiotin [K8]	1	1	P24539	P24539 [155-163]	P24539 1xBiotin [K162]	ATP synthase F(0) complex subunit B1, mitochondrial [OS=Homo sapiens]	1	1283.69	1.174	83.8	116.2	86.1	82.8	120.3	141.2	119.3	50.4	3712.75	3571.2	5189.89	6093.35	5145.7	2174.12				6093.35	3066.66		Not Found	Not Found	Not Found	High	Peak Found	Not Found	High	0.001298	0.01696	1.94	30.5
[-].MSKSESPK.[E]	1xBiotin [K3]; 1xMet-loss+Acetyl [N-Term]	3	2	P09651-1	P09651-1 [1-8]	P09651-1 1xBiotin [K3]; 1xMet-loss+Acetyl [N-Term]	Heterogeneous nuclear ribonucleoprotein A1 [OS=Homo sapiens]	1	1030.49	1.171	86.5	113.5	112.1	87.6	78.1	91.4	115	115.7	23365	18264	16277.4	19055.5	23978.2	24114.5	5038.88	4489.73	4228.21	19055.5	14290.2	9097.08	Peak Found	Peak Found	Peak Found	High	Peak Found	High	High	0.003389	0.05753	1.5	24.18
[R].VVFVFGPDKK.[L]	1xBiotin [K9]	1	1	P30041	P30041 [133-142]	P30041 1xBiotin [K141]	Peroxiredoxin-6 [OS=Homo sapiens]	1	1361.73	1.169	92.2	107.8	107.5	91.5	89.9	137.6	107	66.4	5389.67	4587.67	4507.34	6897.64	5363.07	3330.48				6897.64			Not Found	Not Found	Not Found	High	Not Found	Not Found	High	0.00223	0.02512	2.44	48.92
[K].TVDGPSGKLWR.[D]	1xBiotin [K8]	2	7	P04406-1	P04406-1 [187-197]	P04406-1 1xBiotin [K194]	glyceraldehyde-3-phosphate dehydrogenase [OS=Homo sapiens]	1	1441.73	1.163	92.5	107.5	109.7	65.6	74.2	189.8	86.3	74.4	38316.2	22926.2	25912.3	66315.6	30134.7	25989.3	8263.26	5635.8	6730.96	66315.6	17959.2	9804.34	High	Peak Found	High	High	High	High	High	0.0008826	0.002003	2.5	42.15
[R].KGAAPAPPGK.[T]	1xBiotin [K1]	8	3	Q13428-1	Q13428-1 [384-393]	Q13428-1 1xBiotin [K384]	Treacle protein [OS=Homo sapiens]	1	1119.6	1.162	92.5	107.5	121.8	72.8	94.4	112.5	109.8	88.8	20125	12031.1	15609.8	18587.9	18145.7	14668.7	4340.15	2957.53	4054.79	18587.9	10814.2	5533.72	Peak Found	Peak Found	Peak Found	High	High	High	High	0.003241	0.05117	2.06	23.63
[KR].GAKEHGAVAVER.[V]	1xBiotin [K3]	4	1	Q9UNZ2	Q9UNZ2 [125-136]	Q9UNZ2 1xBiotin [K127]	NSFL1 cofactor p47 [OS=Homo sapiens]	1	1449.73	1.162	92.5	107.5	81.1	92	112.3	145.2	62.5	106.9	3378.31	3835.15	4680.98	6050.44	2606.21	4455.2				6050.44			Not Found	Not Found	Not Found	High	Not Found	Not Found	High	0.0008826	0.0006166	3.02	24.13
[K].KDLTEYLSR.[F]	1xBiotin [K1]	3	1	O14979-1	O14979-1 [162-170]	O14979-1 1xBiotin [K162]	Heterogeneous nuclear ribonucleoprotein D-like [OS=Homo sapiens]	1	1350.67	1.157	92.7	107.3	127.7	93.7	53.5	168.5	108.4	48.1	5755.44	4225.34	2413.46	7596.28	4887.35	2166.25				7596.28	2912.69		Not Found	Not Found	Not Found	High	Peak Found	Not Found	High	0.0008826	0.0005634	2.23	45.62
[K].LTFDTTFSPNTGKK.[S]	1xBiotin [K13]	3	1	P45880	P45880 [108-121]	P45880 1xBiotin [K120]	Voltage-dependent anion-selective channel protein 2 [OS=Homo sapiens]	1	1782.87	1.153	92.9	107.1	98.2	61.7	97	177.1	111.8	54.3	4688.62	2946.23	4632.27	8458.8	5339.53	2594.73				8458.8			Not Found	Not Found	Not Found	High	Not Found	Not Found	High	0.0008826	0.0003752	3.49	44.51
[R].IKLYSESLAR.[Y]	1xBiotin [K2]	3	1	P31150	P31150 [209-218]	P31150 1xBiotin [K210]	Rab GDP dissociation inhibitor alpha [OS=Homo sapiens]	1	1405.75	1.151	93	107	82.6	72.7	99.5	184.7	95.1	65.4	2915.85	2568.06	3514.64	6523.61	3357.47	2310.29				6523.61			Not Found	Not Found	Not Found	High	Not Found	Not Found	High	0.001298	0.01623	1.46	41.01
[K].KVFVGGLSPDTSEEQIK.[E]	1xBiotin [K1]	3	1	O14979-1	O14979-1 [234-250]	O14979-1 1xBiotin [K234]	Heterogeneous nuclear ribonucleoprotein D-like [OS=Homo sapiens]	1	2060.04	1.151	89.9	110.1	105.6	91.5	82.7	112.1	86.6	121.5	4640	4020.86	3636.13	4924.94	3807.21	5340.5				4924.94			Not Found	Not Found	Not Found	High	Not Found	Not Found	High	0.0008826	0.0001627	3.25	44.86
[K].EWVTPKEFR.[E]	1xBiotin [K6]	1	1	P09874	P09874 [332-340]	P09874 1xBiotin [K337]	Poly [ADP-ribose] polymerase 1 [OS=Homo sapiens]	1	1417.69	1.148	93.2	106.8	100.7	80.3	95.5	121.6	109.6	92.2	5078.35	4051.29	4817.3	6134.8	5525.76	4650.52				6134.8			Not Found	Not Found	Not Found	High	Not Found	Not Found	High	0.002374	0.0438	2.04	45.98
[K].FLDAGHKLNFAVASR.[K]	1xBiotin [K7]	1	1	P30101	P30101 [290-304]	P30101 1xBiotin [K296]	Protein disulfide-isomerase A3 [OS=Homo sapiens]	1	1871.96	1.139	78.9	121.1	80.4	55	132.6	151	123.5	57.5	3526.75	2410.5	5816.48	6622.54	5413.6	2520.17				6622.54	3226.32		Not Found	Not Found	Not Found	High	Peak Found	Not Found	High	0.0008826	0.0003185	2.84	47.91
[R].FQNVAKEGVK.[F]	1xBiotin [K6]	2	1	P14625	P14625 [588-597]	P14625 1xBiotin [K593]	Endoplasmin [OS=Homo sapiens]	1	1345.69	1.135	93.7	106.3	60.2	72.4	100.4	231.7	82.2	53.1	3498.42	4208.54	5835.03	13468.7	4777.78	3083.28				13468.7			Not Found	Not Found	Not Found	High	Not Found	Not Found	High	0.0009289	0.003313	2.41	32.92
[K].VTQQGLKMVVPGLDGAQIPR.[D]	1xBiotin [K7]	1	2	P49327	P49327 [1152-1171]	P49327 1xBiotin [K1158]	Fatty acid synthase [OS=Homo sapiens]	1	2333.25	1.134	93.7	106.3	61.3	49.7	280.5	69.5	71.8	67.2	4087.22	3314.46	18698.5	4636.68	4784.49	4479.01			4857.11	4636.68			Not Found	Not Found	High	High	Not Found	Not Found	High	0.001298	0.01661	2.31	53.54
[K].ILTLGKLSR.[N]	1xBiotin [K6]	1	1	P09874	P09874 [395-403]	P09874 1xBiotin [K400]	Poly [ADP-ribose] polymerase 1 [OS=Homo sapiens]	1	1226.73	1.132	93.8	106.2	127.3	90.7	72.7	111.5	102.6	95.3	12205.9	8693.05	6967.67	10691.2	9839.5	9140.46	2632.33	2136.95	1809.92	10691.2	5864	3448.2	Peak Found	Peak Found	Peak Found	High	Peak Found	Peak Found	High	0.0009289	0.008206	2.07	46.27
[K].KIFVGGLNPEATEEK.[I]	1xBiotin [K1]	2	1	Q99729-2	Q99729-2 [155-169]	Q99729-2 1xBiotin [K155]	Isoform 2 of Heterogeneous nuclear ribonucleoprotein A/B [OS=Homo sapiens]	1	1857.94	1.128	97.2	102.8	49.9	88.1	104.7	207.9	56.2	93.2	2042.42	3608.73	4286.85	8516.66	2302.9	3816.37				8516.66			Not Found	Not Found	Not Found	High	Not Found	Not Found	High	0.0009289	0.004157	2.85	45.2
[R].VVANSKESYELR.[Y]	1xBiotin [K6]	1	1	P35268	P35268 [102-113]	P35268 1xBiotin [K107]	60S ribosomal protein L22 [OS=Homo sapiens]	1	1620.81	1.126	94.1	105.9	90.5	47.7	128.1	133.9	101.9	97.9	3862.29	2037.62	5465.78	5714.8	4348.16	4176.09				5714.8	2591.35		Not Found	Not Found	Not Found	High	Peak Found	Not Found	High	0.0008826	0.002278	2.3	36.23
[K].YGKIETIEVMEDR.[Q]	1xBiotin [K3]	2	2	P51991-1	P51991-1 [149-161]	P51991-1 1xBiotin [K151]	Heterogeneous nuclear ribonucleoprotein A3 [OS=Homo sapiens]	1	1808.86	1.124	82.6	117.4	47.2	45.9	224.6	163.6	51.7	67.1	3170.23	3085.53	15083.9	10987.8	3469.45	4506.03			3918.18	10987.8	2067.67		Not Found	Not Found	High	High	Peak Found	Not Found	High	0.0008826	0.0003122	1.46	49.7
[-].MATAEVLNIGKK.[L]	1xBiotin [K11]; 1xMet-loss+Acetyl [N-Term]	2	2	P22234	P22234 [1-12]	P22234 1xBiotin [K11]; 1xMet-loss+Acetyl [N-Term]	multifunctional protein ADE2 [OS=Homo sapiens]	1	1411.76	1.122	94.3	105.7	31.3	85	171	173.8	95.4	43.4	2072.86	5625.87	11318	11502.2	6311.88	2875.23			2939.97	11502.2	3761.66		Not Found	Not Found	Peak Found	High	High	Not Found	High	0.0008826	0.001636	2.32	48.81
[K].IKAIPQLQGYLR.[S]	1xBiotin [K2]	1	1	Q02878	Q02878 [261-272]	Q02878 1xBiotin [K262]	60S ribosomal protein L6 [OS=Homo sapiens]	1	1625.92	1.119	94.4	105.6	94.9	101.8	80.4	147.2	69.5	106.2	4813.71	5160.97	4079.24	7465.77	3526.45	5386.28				7465.77			Not Found	Not Found	Not Found	High	Not Found	Not Found	High	0.0009289	0.01011	2.11	52.06
[R].FVGHTKDVLSVAFSSDNR.[Q]	1xBiotin [K6]	1	1	P63244	P63244 [101-118]	P63244 1xBiotin [K106]	Receptor of activated protein C kinase 1 [OS=Homo sapiens]	1	2205.08	1.112	94.7	105.3	122.6	68.8	62.4	200.8	68.9	76.5	5772.56	3236.21	2939.23	9449.18	3244.9	3599.46				9449.18	1933.85		Not Found	Not Found	Not Found	High	Peak Found	Not Found	High	0.0009289	0.005201	3.83	48.21
[K].VFGALKGAVDGGLSIPHSTK.[R]	1xBiotin [K6]	1	1	P46777	P46777 [159-178]	P46777 1xBiotin [K164]	60S ribosomal protein L5 [OS=Homo sapiens]	1	2180.15	1.108	94.9	105.1	92.4	92.5	94.8	140.4	102.4	77.5	5004.98	5007.82	5135.04	7602.77	5547.74	4196.38				7602.77	3306.26		Not Found	Not Found	Not Found	High	Peak Found	Not Found	High	0.0008826	0.0004016	3.26	49.71
[R].KLAVNMVPFPR.[L]	1xBiotin [K1]	11	2	P07437; P68371; Q9BVA1	P07437 [252-262]; P68371 [252-262]; Q9BVA1 [252-262]	P07437 1xBiotin [K252]; P68371 1xBiotin [K252]; Q9BVA1 1xBiotin [K252]	tubulin beta chain [OS=Homo sapiens] Tubulin beta-4B chain [OS=Homo sapiens] Tubulin beta-2B chain [OS=Homo sapiens]	1	1497.81	1.106	107.1	92.9	80	87.4	46.7	265	51.6	69.3	5056.58	5525.82	2949.92	16751.7	3263.44	4382.55				16751.7	1944.9		Not Found	Not Found	Not Found	High	Peak Found	Not Found	High	0.0008826	0.0006008	2.88	50.88
[K].LVSQKPK.[L]	1xBiotin [K5]	2	1	P14314	P14314 [432-438]	P14314 1xBiotin [K436]	Glucosidase 2 subunit beta [OS=Homo sapiens]	0	1025.58	1.103	96.8	103.2	86.8	56.1	127.8	174.9	61.9	92.5	3353.19	2165.54	4934.57	6752.8	2388.34	3572.05				6752.8			Not Found	Not Found	Not Found	High	Not Found	Not Found	High	0.002374	0.04069	1.86	25.96
[R].GQGEKSATPSR.[K]	1xBiotin [K5]	1	4	P46060	P46060 [402-412]	P46060 1xBiotin [K406]	Ran GTPase-activating protein 1 [OS=Homo sapiens]	1	1343.64	1.103	96.1	103.9	48	123	99.7	135.7	107.9	85.8	5456.59	13998.5	11346.8	15437.9	12274.1	9763.25		3441.15	2947.45	15437.9	7314.94	3683.14	Not Found	High	Peak Found	High	High	High	High	0.0008826	0.001984	2.05	20.98
[R].IDFSKLTSLNVK.[Y]	1xBiotin [K5]	10	2	P26599	P26599 [255-266]	P26599 1xBiotin [K259]	Polypyrimidine tract-binding protein 1 [OS=Homo sapiens]	1	1590.86	1.086	95.9	104.1	100.2	103.5	83.9	114.2	89.4	108.8	4978.27	5142.31	4166.34	5671.14	4443.96	5406.81				5671.14			Not Found	Not Found	Not Found	High	High	Not Found	High	0.0008826	0.0005857	2.73	54.21
[R].GNPTVEVDLFTSKGLFR.[A]	1xBiotin [K13]	1	2	P06733-1	P06733-1 [16-32]	P06733-1 1xBiotin [K28]	alpha-enolase [OS=Homo sapiens]	1	2106.07	1.085	95.9	104.1	101.5	63.9	52	261.2	52	69.4	4276.45	2694.99	2189.67	11009.3	2192.02	2923.03				11009.3			Not Found	Not Found	Not Found	High	Not Found	Not Found	High	0.0009289	0.003179	2.25	59.48
[K].DLPEHAVLKMK.[G]	1xBiotin [K9]; 1xOxidation [M10]	2	3	Q00839	Q00839 [627-637]	Q00839 1xBiotin [K635]	Heterogeneous nuclear ribonucleoprotein U [OS=Homo sapiens]	1	1522.78	1.081	96.1	103.9	103.9	148.3	48.8	112.3	121.8	64.9	35973.6	51350	16883.7	38894.6	42173.2	22455.2	7758.07	12623	4385.7	38894.6	25133.7	8471.11	Peak Found	Peak Found	Peak Found	High	High	Peak Found	High	0.0009289	0.007907	2.36	34.72
[R].VQILKDYVR.[Q]	1xBiotin [K5]	3	1	P53396-1	P53396-1 [987-995]	P53396-1 1xBiotin [K991]	ATP-citrate synthase [OS=Homo sapiens]	1	1359.75	1.081	105.4	94.6	109.1	122.2	46.6	132.1	92.1	97.9	5025.21	5628.21	2146.28	6083.55	4239.73	4510.52				6083.55			Not Found	Not Found	Not Found	High	Not Found	Not Found	High	0.0009289	0.004197	2.06	44.8
[K].EGNLAIQQAGKNMSAR.[L]	1xBiotin [K11]; 1xOxidation [M13]	1	2	Q9UKZ9	Q9UKZ9 [344-359]	Q9UKZ9 1xBiotin [K354]	Procollagen C-endopeptidase enhancer 2 [OS=Homo sapiens]	1	1929.93	1.075	109	91	39.1	163.2	50.7	42	262.7	42.3	3396.57	14190.9	4408.75	3650.72	22838.3	3679.01		3488.46			13610.8		Not Found	Peak Found	Not Found	Not Found	High	Not Found	High	0.0008826	0.0007286	2.42	32.33
[R].IKGPNAVQLVK.[T]	1xBiotin [K2]	3	1	Q7Z6Z7	Q7Z6Z7 [1916-1926]	Q7Z6Z7 1xBiotin [K1917]	E3 ubiquitin-protein ligase HUWE1 [OS=Homo sapiens]	1	1392.8	1.064	96.9	103.1	171.9	54.9	85.9	91.5	88	107.8	31158.2	9955.66	15574.7	16577.4	15948.5	19532.3	6719.58	2447.33	4045.69	16577.4	9504.76	7368.47	Peak Found	Peak Found	Peak Found	High	Peak Found	Peak Found	High	0.0009289	0.003187	2.75	39.5
[K].KLETAVNLAWTAGNSNTR.[F]	1xBiotin [K1]	1	1	P21796	P21796 [201-218]	P21796 1xBiotin [K201]	voltage-dependent anion-selective channel protein 1 [OS=Homo sapiens]	1	2172.09	1.062	96.5	103.5	97.6	141.8	62.5	127.3	104.6	66.3	3350.37	4870.24	2144.93	4371.17	3592.38	2277.5				4371.17			Not Found	Not Found	Not Found	High	Not Found	Not Found	High	0.002374	0.04172	2.18	47.68
[K].KLFTAESLIGLK.[N]	1xBiotin [K1]	2	1	P48444	P48444 [336-347]	P48444 1xBiotin [K336]	Coatomer subunit delta [OS=Homo sapiens]	1	1545.87	1.053	99.3	100.7	109.4	73.3	105	90.6	106.6	115.1	4296.59	2878.9	4124.57	3557.25	4186.14	4522.2				3557.25			Not Found	Not Found	Not Found	High	Not Found	Not Found	High	0.0008826	0.002326	1.96	56
[K].MFIGGLSWDTTKK.[D]	1xBiotin [K13]	4	1	Q14103	Q14103 [99-111]	Q14103 1xBiotin [K111]	heterogeneous nuclear ribonucleoprotein D0 [OS=Homo sapiens]	1	1709.84	1.052	116.1	83.9	55	103.3	86.7	57.8	62.7	234.4	2937.61	5518.94	4633.45	3089.76	3351.51	12519.4				3089.76		4722.87	Not Found	Not Found	Not Found	High	Not Found	Peak Found	High	0.001298	0.01646	2.77	54.07
[R].KDSETGENIR.[Q]	1xBiotin [K1]	1	1	P38646	P38646 [625-634]	P38646 1xBiotin [K625]	Stress-70 protein, mitochondrial [OS=Homo sapiens]	1	1374.63	1.042	98.6	101.4	96.2	54.8	110.5	182.3	57.1	99	4917.28	2800.58	5647.72	9315.9	2918.67	5060.92				9315.9			Not Found	Not Found	Not Found	High	Not Found	Not Found	High	0.0009289	0.008825	2.44	24.94
[R].KAAALEFLNR.[F]	1xBiotin [K1]	2	1	P31948	P31948 [78-87]	P31948 1xBiotin [K78]	stress-induced-phosphoprotein 1 [OS=Homo sapiens]	1	1358.72	1.033	98.4	101.6	91.6	113.9	100.1	147	43.9	103.4	4617.89	5741.12	5046.46	7409.71	2210.98	5211.46				7409.71			Not Found	Not Found	Not Found	High	Not Found	Not Found	High	0.0008826	0.002144	2.37	47.44
[K].LFNLSKEDDVR.[Q]	1xBiotin [K6]	1	1	P62753	P62753 [144-154]	P62753 1xBiotin [K149]	40S RIBOSOMAL PROTEIN S6 [OS=Homo sapiens]	1	1561.77	1.029	98.6	101.4	104.6	62.7	114.9	152.4	107.7	57.7	4940.02	2959.41	5426.8	7194.31	5082.86	2723.44				7194.31			Not Found	Not Found	Not Found	High	Not Found	Not Found	High	0.0009289	0.01246	2.78	45.53
[R].VLIPVKQYPK.[EF]	1xBiotin [K6]	4	1	Q07666	Q07666 [160-169]	Q07666 1xBiotin [K165]	KH domain-containing, RNA-binding, signal transduction-associated protein 1 [OS=Homo sapiens]	1	1410.82	1.026	111.1	88.9	60.8	88.2	93.7	224.3	62.4	70.6	2132.92	3093.73	3284.88	7868.66	2188.03	2477.34				7868.66			Not Found	Not Found	Not Found	High	Not Found	Not Found	High	0.003389	0.0601	1.66	44.29
[K].ELKIDIIPNPQER.[T]	1xBiotin [K3]	2	2	P08238	P08238 [70-82]	P08238 1xBiotin [K72]	Heat shock protein HSP 90-beta [OS=Homo sapiens]	1	1790.95	1.023	105.8	94.2	107.1	79.8	116.1	95.3	118.8	82.9	5118.23	3814.14	5548.94	4553.68	5675.71	3961.19				4553.68			Not Found	Not Found	Not Found	High	Not Found	Not Found	High	0.0009289	0.008996	2.61	50.84
[R].HQGVMVGMGQKDSYVGDEAQSK.[R]	1xBiotin [K11]	6	1	P60709	P60709 [40-61]	P60709 1xBiotin [K50]	Actin, cytoplasmic 1 [OS=Homo sapiens]	1	2577.15	1.019	120.9	79.1	48.4	27.9	43.7	423	28.4	28.6	4076.43	2348.24	3678.84	35630.6	2393.82	2408.59				35630.6			Not Found	Not Found	Not Found	High	Not Found	Not Found	High	0.0008826	6e-05	4.16	38.52
[R].SGYLLPDTKAYGDR.[I]	1xBiotin [K9]	1	1	P14625	P14625 [725-738]	P14625 1xBiotin [K733]	Endoplasmin [OS=Homo sapiens]	1	1781.85	1.017	101.3	98.7	95.5	74.6	106.1	154.8	93	75.9	3205.24	2503.28	3559.6	5193.16	3121.23	2544.74				5193.16			Not Found	Not Found	Not Found	High	Not Found	Not Found	High	0.0008826	0.001246	2.1	44.2
[K].KTSATVGPK.[A]	1xBiotin [K1]	1	1	P16104	P16104 [120-128]	P16104 1xBiotin [K120]	Histone H2AX [OS=Homo sapiens]	1	1114.59	1.015	96	104	84.2	77.4	138.3	91.2	140.5	68.5	3518.37	3234.26	5782.07	3812.04	5870.81	2861.22				3812.04			Not Found	Not Found	Not Found	High	Not Found	Not Found	High	0.002374	0.04406	1.67	22.84
[R].ALQASALKAWGGK.[K]	1xBiotin [K8]	2	1	P04075	P04075 [305-317]	P04075 1xBiotin [K312]	fructose-bisphosphate aldolase A [OS=Homo sapiens]	1	1526.81	1.012	99.4	100.6	139.9	108.3	50	109.6	112.3	79.9	5871.83	4547.48	2099.49	4602.92	4714.26	3354.28				4602.92	2809.53		Not Found	Not Found	Not Found	High	Peak Found	Not Found	High	0.0009289	0.004402	2.46	45.67
[K].TKFENLCK.[I]	1xBiotin [K2]; 1xCarbamidomethyl [C7]	3	1	P07900	P07900 [566-573]	P07900 1xBiotin [K567]	Heat shock protein HSP 90-alpha [OS=Homo sapiens]	1	1265.6	1.012	90.6	109.4	140	116.5	38.1	140.6	141.7	23	15389.4	12802.7	4191.35	15452.9	15570.6	2527.97	3318.88	3147.21		15452.9	9279.53		Peak Found	Peak Found	Not Found	High	Peak Found	Not Found	High	0.002374	0.03861	2.49	36.81
[K].LTSLNVKYNNDK.[S]	1xBiotin [K7]	10	1	P26599	P26599 [260-271]	P26599 1xBiotin [K266]	Polypyrimidine tract-binding protein 1 [OS=Homo sapiens]	1	1634.82	1.01	80.7	119.3	57.3	82.6	139.7	122.3	140.2	57.9	2372.93	3421.16	5786.53	5062.15	5804.91	2396.77				5062.15			Not Found	Not Found	Not Found	High	Not Found	Not Found	High	0.0008826	0.002194	2.49	37.76
[K].VGIVGKYGTR.[Y]	1xBiotin [K6]	1	1	P61513	P61513 [8-17]	P61513 1xBiotin [K13]	60S ribosomal protein L37a [OS=Homo sapiens]	1	1275.69	1.003	99.8	100.2	97.8	64.9	103.7	190.6	44.9	98.1	4541.24	3015.63	4814.56	8852.61	2084.76	4554.9				8852.61			Not Found	Not Found	Not Found	High	Not Found	Not Found	High	0.0008826	0.002293	2.18	38.21
[R].KLYGDADYLEER.[H]	1xBiotin [K1]	2	1	P17812	P17812 [466-477]	P17812 1xBiotin [K466]	CTP synthase 1 [OS=Homo sapiens]	1	1697.78	0.987	95.5	104.5	110.4	69	123.2	121.6	120.8	55.1	5085.42	3178.15	5676.76	5602.77	5567.33	2538.69				5602.77			Not Found	Not Found	Not Found	High	Not Found	Not Found	High	0.0008826	0.001128	2.11	42.14
[K].TLFVKGLSEDTTEETLK.[E]	1xBiotin [K5]	1	1	P19338	P19338 [573-589]	P19338 1xBiotin [K577]	Nucleolin [OS=Homo sapiens]	1	2137.07	0.979	101.1	98.9	92	127.2	95.6	137	54.6	93.6	3885.62	5369.27	4038.19	5783.36	2305.81	3952.57				5783.36			Not Found	Not Found	Not Found	High	Not Found	Not Found	High	0.0008826	0.00149	2.35	51
[R].SGDWKGYTGK.[T]	1xBiotin [K5]	1	1	P06744	P06744 [138-147]	P06744 1xBiotin [K142]	glucose-6-phosphate isomerase [OS=Homo sapiens]	1	1324.6	0.977	98.1	101.9	111.6	92.5	98.4	109	86.4	102.2	5723.73	4742.32	5049	5589.51	4430.67	5239.59				5589.51			Not Found	Not Found	Not Found	High	Not Found	Not Found	High	0.0009289	0.003976	2.38	36
[K].LKDYAFVHFEDR.[G]	1xBiotin [K2]	4	1	O43390-1	O43390-1 [373-384]	O43390-1 1xBiotin [K374]	heterogeneous nuclear ribonucleoprotein r [OS=Homo sapiens]	1	1765.84	0.973	112.6	87.4	71.8	114.2	127.1	74.6	88.7	123.6	4811.57	7647.31	8511.14	4997.67	5937.12	8278.61		1879.89	2210.85	4997.67	3538.32	3123.07	Not Found	Peak Found	Peak Found	High	Peak Found	Peak Found	High	0.0008826	0.00146	2.55	45.97
[R].STKPNSSTPASPPGTASGR.[N]	1xBiotin [K3]	2	1	Q8WV28-1	Q8WV28-1 [209-227]	Q8WV28-1 1xBiotin [K211]	B-cell linker protein [OS=Homo sapiens]	0	2025.97	0.97	101.5	98.5	319.2	46.8	28.7	45.4	31.4	128.6	29319.5	4295.52	2631.37	4168.71	2880.62	11810.4	6323.05					4455.42	High	Not Found	Not Found	Not Found	Not Found	Peak Found	High	0.00223	0.0244	2.24	28.39
[K].FVLSSGKFYGDEEK.[D]	1xBiotin [K7]	1	1	P27797	P27797 [49-62]	P27797 1xBiotin [K55]	Calreticulin [OS=Homo sapiens]	1	1831.86	0.969	104	96	117.8	121.4	49.8	108.8	117.6	84.7	5250.28	5412.41	2219	4850.95	5242.09	3778.29				4850.95			Not Found	Not Found	Not Found	High	Not Found	Not Found	High	0.0009289	0.003323	2.53	47.35
[K].VGLQVVAVKAPGFGDNR.[K]	1xBiotin [K9]	1	1	P10809	P10809 [293-309]	P10809 1xBiotin [K301]	60 kDa heat shock protein, mitochondrial [OS=Homo sapiens]	1	1953.04	0.949	102.6	97.4	87.8	105	71.3	190.8	83.4	61.7	3115.04	3725.3	2529.68	6768.68	2956.93	2188.95				6768.68			Not Found	Not Found	Not Found	High	Not Found	Not Found	High	0.0008826	0.0001924	3.49	49.84
[R].MEESFSSKYVPK.[Y]	1xBiotin [K8]	2	1	P42167	P42167 [382-393]	P42167 1xBiotin [K389]	Lamina-associated polypeptide 2, isoforms beta/gamma [OS=Homo sapiens]	1	1657.76	0.946	102.8	97.2	33.4	94	192.4	139.6	51.7	88.9	2009.38	5652.35	11569.1	8393.36	3108.78	5347.41			3005.18	8393.36			Not Found	Not Found	Peak Found	High	Not Found	Not Found	High	0.001298	0.01535	2.39	41.68
[R].LAAIVAKQVLLGR.[K]	1xBiotin [K7]	1	1	P40429	P40429 [19-31]	P40429 1xBiotin [K25]	60S ribosomal protein L13a [OS=Homo sapiens]	1	1577.96	0.941	103	97	92.1	104.7	111.3	114.9	78.6	98.5	4664.29	5298.39	5632.54	5815.14	3979.81	4986.82				5815.14			Not Found	Not Found	Not Found	High	Not Found	Not Found	High	0.0008826	0.0003101	2.38	56.47
[K].GQKCEFQDAYVLLSEK.[K]	1xBiotin [K3]; 1xCarbamidomethyl [C4]	1	1	P10809	P10809 [234-249]	P10809 1xBiotin [K236]	60 kDa heat shock protein, mitochondrial [OS=Homo sapiens]	1	2141	0.936	96.1	103.9	76	97.2	129.7	121.4	105.1	70.7	2834.8	3627.66	4838.89	4530.29	3921.98	2639.46				4530.29			Not Found	Not Found	Not Found	High	Not Found	Not Found	High	0.003241	0.04989	2.65	53.69
[K].GQPLCVLSAMKMETVVTSPMEGTVR.[K]	1xBiotin [K11]; 1xCarbamidomethyl [C5]	1	6	P11498	P11498 [1134-1158]	P11498 1xBiotin [K1144]	pyruvate carboxylase, mitochondrial [OS=Homo sapiens]	1	2947.42	0.936	103.3	96.7	40.7	3.6	424.8	74.1	38.1	18.7	24148.7	2164.46	252255	44013.3	22597.1	11098.7	5207.9		65525.9	44013.3	13467.1	4186.92	Peak Found	Not Found	High	High	High	Peak Found	High	0.0008826	0.0002495	3.73	61.78
[K].IKMIDMPVER.[M]	1xBiotin [K2]	3	1	Q15287-1	Q15287-1 [187-196]	Q15287-1 1xBiotin [K188]	RNA-binding protein with serine-rich domain 1 [OS=Homo sapiens]	1	1457.73	0.933	103.5	96.5	76.9	105.5	128.7	127.6	62.8	98.5	3504.43	4811.61	5866.6	5819.32	2863.04	4489.59				5819.32			Not Found	Not Found	Not Found	High	Not Found	Not Found	High	0.0009289	0.01286	1.83	45.72
[R].KGVITVKDGK.[T]	1xBiotin [K7]	1	1	P10809	P10809 [196-205]	P10809 1xBiotin [K202]	60 kDa heat shock protein, mitochondrial [OS=Homo sapiens]	2	1270.72	0.93	103.6	96.4	112	100	102.1	135.4	55.4	95	5132.51	4580.41	4678.11	6204.26	2535.94	4352.51				6204.26			Not Found	Not Found	Not Found	High	Not Found	Not Found	High	0.003241	0.04791	2.02	29.27
[K].MKETAEAYLGK.[K]	1xBiotin [K2]	1	1	P11021	P11021 [153-163]	P11021 1xBiotin [K154]	78 kDa glucose-regulated protein [OS=Homo sapiens]	1	1466.7	0.928	103.7	96.3	90.8	79.7	115.5	163.6	84.3	66.1	4586.68	4023.74	5833.46	8261.29	4257.27	3335.83				8261.29			Not Found	Not Found	Not Found	High	Not Found	Not Found	High	0.00223	0.0262	2.68	38.41
[R].LKGSGNLEAIHIIK.[K]	1xBiotin [K2]	2	1	P78371-1	P78371-1 [190-203]	P78371-1 1xBiotin [K191]	T-complex protein 1 subunit beta [OS=Homo sapiens]	1	1718.96	0.919	104.2	95.8	94.6	62.7	104.7	199.9	51.1	87	3791.5	2511.91	4194.39	8007.77	2046.44	3485.21				8007.77			Not Found	Not Found	Not Found	High	Not Found	Not Found	High	0.0008826	0.001248	2.51	42.8
[K].YEKDIAAYR.[A]	1xBiotin [K3]	2	1	P09429	P09429 [155-163]	P09429 1xBiotin [K157]	High mobility group protein B1 [OS=Homo sapiens]	1	1354.65	0.919	104.2	95.8	107.9	94	89	164.4	58.3	86.3	5870.22	5112.15	4839.76	8940.73	3172.5	4696.12				8940.73	1890.7		Not Found	Not Found	Not Found	High	Peak Found	Not Found	High	0.0008826	0.001471	1.87	38.18
[K].VLVGKNFEDVAFDEK.[K]	1xBiotin [K5]	1	1	P07237	P07237 [371-385]	P07237 1xBiotin [K375]	Protein disulfide-isomerase [OS=Homo sapiens]	1	1935.95	0.909	104.8	95.2	143.6	59.4	97.9	130.2	88.9	80.1	5578.58	2307.37	3803.87	5058.33	3455.86	3112.66				5058.33			Not Found	Not Found	Not Found	High	Not Found	Not Found	High	0.0009289	0.008392	1.86	51.22
[K].AVEHINKTIAPALVSK.[K]	1xBiotin [K7]	1	8	P06733-1	P06733-1 [65-80]	P06733-1 1xBiotin [K71]	alpha-enolase [OS=Homo sapiens]	1	1917.06	0.897	103.9	96.1	99.5	91.7	128.5	106	82.3	92	75050.4	69168.9	96890.8	79892.5	62071.9	69352.8	16185.4	17003.3	25168.3	79892.5	36992.7	26163.1	High	High	High	High	High	High	High	0.0008826	0.0004568	3.16	40.61
[K].AQAYQTGKDISTNYYASQK.[K]	1xBiotin [K8]	1	9	P14625	P14625 [664-682]	P14625 1xBiotin [K671]	Endoplasmin [OS=Homo sapiens]	1	2363.1	0.893	105.7	94.3	73	105	143	93.8	90.8	94.5	40565.8	58347.3	79456.6	52102.8	50446.7	52504.6	8748.41	14343.1	20639.7	52102.8	30064.5	19807.1	High	High	High	High	High	High	High	0.0008826	0.0003767	1.85	38.11
[R].TLLIKTVETR.[D]	1xBiotin [K5]	1	8	P08670	P08670 [441-450]	P08670 1xBiotin [K445]	Vimentin [OS=Homo sapiens]	1	1399.8	0.89	105.8	94.2	171.8	79.5	90.1	102.2	76.3	80.2	97090.4	44906.7	50885.8	57738.4	43087.6	45313.3	20938.5	11039.1	13218.1	57738.4	25678.7	17094.2	High	High	High	High	Peak Found	High	High	0.0008826	0.0004151	2.48	45.24
[K].NSTFSEIFKK.[E]	1xBiotin [K9]	2	1	P29401	P29401 [344-353]	P29401 1xBiotin [K352]	Transketolase [OS=Homo sapiens]	1	1426.7	0.886	106.1	93.9	114.3	96.2	100.9	89.4	115.8	83.4	5471.01	4604.08	4828.31	4276.85	5544.44	3992.38				4276.85			Not Found	Not Found	Not Found	High	Not Found	Not Found	High	0.001298	0.01577	1.81	46.96
[K].GKLDVQFSGLTKGDAVR.[D]	1xBiotin [K12]	2	4	P21333	P21333 [905-921]	P21333 1xBiotin [K916]	Filamin-A [OS=Homo sapiens]	2	2017.05	0.878	106.5	93.5	26.4	107.1	185.5	94	103	83.9	3729.01	15124.6	26194.1	13272.2	14544.1	11850.4		3717.98	6804.17	13272.2	8667.81	4470.51	Not Found	Peak Found	High	High	High	High	High	0.0009289	0.01048	3.1	44.04
[R].VKWPNDLYLNDR.[K]	1xBiotin [K2]	2	23	AGIA-fabID; EGFR-fabID	AGIA-fabID [397-408]; EGFR-fabID [417-428]	AGIA-fabID 1xBiotin [K398]; EGFR-fabID 1xBiotin [K418]	Heavy Heavy	1	1758.86	0.869	107	93	134.6	82.9	106.2	89.6	92.3	94.4	389821	240300	307768	259486	267325	273541	84068.8	59071.3	79945.7	259486	159316	103192	High	High	High	High	High	High	High	0.0008826	1.431e-05	2.65	49.13
[R].ALKAVSDWIDEQEK.[G]	1xBiotin [K3]	7	1	Q12906-1	Q12906-1 [41-54]	Q12906-1 1xBiotin [K43]	Interleukin enhancer-binding factor 3 [OS=Homo sapiens]	1	1857.91	0.867	107.1	92.9	102.2	94.7	98.1	155.8	64.1	85.1	4998.27	4630.34	4797.96	7617.78	3135.77	4161.61				7617.78			Not Found	Not Found	Not Found	High	Not Found	Not Found	High	0.0008826	9.612e-05	2.99	50.2
[K].YKQIFLGGVDK.[HR]	1xBiotin [K2]	2	1	P12236; P05141	P12236 [95-105]; P05141 [95-105]	P12236 1xBiotin [K96]; P05141 1xBiotin [K96]	ADP/ATP translocase 3 [OS=Homo sapiens] ADP/ATP translocase 2 [OS=Homo sapiens]	1	1493.78	0.867	107.1	92.9	126	67.4	110.3	149.4	95.6	51.4	5025.19	2685.91	4398.21	5957.73	3811.93	2048.2				5957.73			Not Found	Not Found	Not Found	High	Not Found	Not Found	High	0.0008826	0.001691	2.45	46.87
[K].KVEKVVVSNR.[L]	1xBiotin [K4]	2	1	P07900	P07900 [582-591]	P07900 1xBiotin [K585]	Heat shock protein HSP 90-alpha [OS=Homo sapiens]	2	1383.78	0.863	113.6	86.4	79.4	49.3	88.1	280.2	60.4	42.6	4619.62	2869.79	5125.35	16305.2	3513.61	2475.92				16305.2			Not Found	Not Found	Not Found	High	Not Found	Not Found	High	0.0009289	0.009567	2.64	27.85
[K].GNDISSGTVLSDYVGSGPPKGTGLHR.[Y]	1xBiotin [K20]	1	1	P30086	P30086 [94-119]	P30086 1xBiotin [K113]	phosphatidylethanolamine-binding protein 1 [OS=Homo sapiens]	1	2797.36	0.856	107.7	92.3	118.1	84.1	113.5	122.7	64.4	97.2	5338.54	3803.56	5130.94	5548.84	2909.26	4392.91				5548.84			Not Found	Not Found	Not Found	High	Not Found	Not Found	High	0.001298	0.01691	2.9	45.51
[K].VAQPKEVYR.[Q]	1xBiotin [K5]	3	1	O14979-1	O14979-1 [307-315]	O14979-1 1xBiotin [K311]	Heterogeneous nuclear ribonucleoprotein D-like [OS=Homo sapiens]	1	1315.68	0.852	110.3	89.7	30.6	130.2	144.5	123.1	106	65.6	3031.15	12882.8	14296.3	12184.7	10486.2	6489.57		3166.89	3713.6	12184.7	6249.41	2448.16	Not Found	Peak Found	Peak Found	High	Peak Found	Peak Found	High	0.0009289	0.008805	1.95	31.34
[R].IAGQVAAANKK.[H]	1xBiotin [K10]	1	1	P39019	P39019 [134-144]	P39019 1xBiotin [K143]	40S ribosomal protein S19 [OS=Homo sapiens]	1	1296.71	0.851	55.2	144.8	232.8	35.3	28.5	186.5	92.6	24.3	24045.6	3641.84	2947.43	19263	9562.53	2508.43	5185.68			19263	5698.94		Peak Found	Not Found	Not Found	Peak Found	High	Not Found	High	0.003389	0.06351	1.76	26.38
[K].DKANMQHR.[Y]	1xBiotin [K2]	2	1	P31943	P31943 [348-355]	P31943 1xBiotin [K349]	Heterogeneous nuclear ribonucleoprotein H [OS=Homo sapiens]	1	1225.56	0.827	109.5	90.5	108.6	80.8	97.2	176.9	80.4	56.2	4818.09	3583.2	4312.93	7848.26	3567.67	2493.02				7848.26			Not Found	Not Found	Not Found	High	Not Found	Not Found	High	0.002374	0.04321	2.04	20.71
[K].GQPLCVLSAMKMETVVTSPMEGTVR.[K]	1xBiotin [K11]; 1xCarbamidomethyl [C5]; 1xOxidation [M]	1	26	P11498	P11498 [1134-1158]	P11498 1xBiotin [K1144]	pyruvate carboxylase, mitochondrial [OS=Homo sapiens]	1	2963.42	0.825	101.9	98.1	55.2	52.2	332.6	53.2	63.6	43.1	157394	148883	947930	151549	181283	122798	33943.6	36598.9	246234	151549	108038	46325	High	High	High	High	High	High	High	0.0008826	0.0001004	3.22	58.98
[K].FYEAFSKNLK.[L]	1xBiotin [K7]	1	1	P08238	P08238 [429-438]	P08238 1xBiotin [K435]	Heat shock protein HSP 90-beta [OS=Homo sapiens]	1	1472.72	0.823	109.9	90.1	101.3	76.7	94.4	187.1	77.4	63.1	4994.56	3777.69	4651.91	9222.46	3812.5	3109.39				9222.46	2272.12		Not Found	Not Found	Not Found	High	Peak Found	Not Found	High	0.0009289	0.007836	2.62	45.22
[R].VKTLHPAVHAGILAR.[N]	1xBiotin [K2]	2	1	P31939	P31939 [65-79]	P31939 1xBiotin [K66]	bifunctional purine biosynthesis protein purH [OS=Homo sapiens]	1	1809.03	0.818	110	90	104.8	94.7	104.1	134.7	76.7	85.1	16090.7	14532.1	15978.9	20673.9	11773.9	13068.6	3470.12	3572.32	4150.67	20673.9	7016.86	4930.05	Peak Found	Peak Found	Peak Found	High	Peak Found	Peak Found	High	0.0008826	2.2e-06	3.08	35.66
[K].INAKLNYVPLEK.[Q]	1xBiotin [K4]	1	3	Q7L014	Q7L014 [904-915]	Q7L014 1xBiotin [K907]	probable ATP-dependent RNA helicase DDX46 [OS=Homo sapiens]	1	1627.89	0.818	107	93	138.3	100.3	97.1	87.1	79.4	97.8	26635.4	19310.3	18702.7	16770.4	15289.6	18835.9	5744.19	4746.93	4858.2	16770.4	9112.1	7105.74	High	Peak Found	Peak Found	High	High	Peak Found	High	0.0008826	0.0002033	2.82	45.53
[K].GQEVSPKVYFMK.[Q]	1xBiotin [K7]; 1xOxidation [M11]	1	6	P09936	P09936 [72-83]	P09936 1xBiotin [K78]	Ubiquitin carboxyl-terminal hydrolase isozyme L1 [OS=Homo sapiens]	1	1654.8	0.811	106.7	93.3	109.2	124	99.6	71.2	95.4	100.5	21013.9	23870.7	19171	13707.2	18362.6	19348.9	4531.85	5867.96	4979.87	13707.2	10943.5	7299.28	Peak Found	High	High	High	High	High	High	0.0008826	0.001364	2.1	43.05
[R].GKATISNDGATILK.[L]	1xBiotin [K2]	2	1	Q99832	Q99832 [54-67]	Q99832 1xBiotin [K55]	T-complex protein 1 subunit eta [OS=Homo sapiens]	1	1614.85	0.81	110.6	89.4	73.8	64.4	93.4	256.5	52.2	59.7	3080.39	2687.81	3897.06	10700.2	2177.92	2488.9				10700.2			Not Found	Not Found	Not Found	High	Not Found	Not Found	High	0.0009289	0.006057	2.47	39.21
[R].MQKEITALAPSTMK.[I]	1xBiotin [K3]	7	2	P60709	P60709 [313-326]	P60709 1xBiotin [K315]	Actin, cytoplasmic 1 [OS=Homo sapiens]	1	1774.89	0.807	110.7	89.3	96.4	96.8	45.7	248.3	77.8	35	5612.38	5637.21	2658.78	14453.8	4526.75	2038.04				14453.8	2697.78		Not Found	Not Found	Not Found	High	Peak Found	Not Found	High	0.0008826	0.0001516	3.12	44.83
[K].ESNGPVKVWGSIK.[G]	1xBiotin [K7]	1	1	P00441	P00441 [25-37]	P00441 1xBiotin [K31]	Superoxide dismutase [Cu-Zn] [OS=Homo sapiens]	1	1626.83	0.8	117.5	82.5	79.3	57.7	79	282.4	55.5	46.2	3478.44	2529.28	3465.54	12385.1	2432.49	2024.69				12385.1			Not Found	Not Found	Not Found	High	Not Found	Not Found	High	0.0009289	0.004296	1.94	45.02
[K].FLNKLAEER.[R]	1xBiotin [K4]	2	1	P43243	P43243 [833-841]	P43243 1xBiotin [K836]	Matrin-3 [OS=Homo sapiens]	1	1345.69	0.763	119.9	80.1	120.5	132.1	93.8	100.7	72.6	80.4	4169.34	4570.47	3245.83	3486.8	2511.34	2783.15				3486.8			Not Found	Not Found	Not Found	High	Not Found	Not Found	High	0.001298	0.01633	1.77	42.18
[R].KQVVNIPSFIVR.[L]	1xBiotin [K1]	1	1	P46781	P46781 [139-150]	P46781 1xBiotin [K139]	40S ribosomal protein S9 [OS=Homo sapiens]	1	1625.92	0.751	116.6	83.4	104.7	99.2	108.5	138.2	74.5	74.9	4885.89	4628.93	5060.48	6445.05	3476.86	3493.18				6445.05	2072.09		Not Found	Not Found	Not Found	High	Peak Found	Not Found	High	0.0008826	0.001971	2.63	53.7
[R].VLMKSPSPALHPPQK.[Y]	1xBiotin [K4]; 1xOxidation [M3]	1	7	Q9H6S0	Q9H6S0 [1217-1231]	Q9H6S0 1xBiotin [K1220]	Probable ATP-dependent RNA helicase YTHDC2 [OS=Homo sapiens]	1	1871.99	0.739	123.9	76.1	142.5	130.2	73.7	68.5	79.9	105.3	48367.2	44182.3	25004.6	23242.4	27118.3	35758.5	10430.9	10861	6495.19	23242.4	16161.6	13489.7	High	High	Peak Found	High	High	Peak Found	High	0.0008826	3.34e-05	2.92	33.79
[R].TTKDGWVYYANHTEEK.[T]	1xBiotin [K3]	6	2	Q9NZC7	Q9NZC7 [26-41]	Q9NZC7 1xBiotin [K28]	WW domain-containing oxidoreductase [OS=Homo sapiens]	1	2167.98	0.739	128.4	71.6	134.6	75.9	139.8	75.1	71.3	103.3	28293.6	15942.8	29376.2	15777.1	14986	21711.4	6101.8	3919.11	7630.76	15777.1	8931.11	8190.51	Peak Found	High	Peak Found	High	Peak Found	Peak Found	High	0.0009289	0.0044	2.41	40.42
[-].MAQNLKDLAGR.[L]	1xBiotin [K6]; 1xMet-loss+Acetyl [N-Term]	2	1	Q99623	Q99623 [1-11]	Q99623 1xBiotin [K6]; 1xMet-loss+Acetyl [N-Term]	Prohibitin-2 [OS=Homo sapiens]	1	1353.69	0.716	116.6	83.4	134.5	76.9	121.7	127.6	87.1	52.2	5612	3211.11	5077.81	5323.98	3635.65	2179.62				5323.98			Not Found	Not Found	Not Found	High	Not Found	Not Found	High	0.0009289	0.007379	1.85	47.52
[K].ISKGANPVEIR.[R]	1xBiotin [K3]	2	9	P10809	P10809 [131-141]	P10809 1xBiotin [K133]	60 kDa heat shock protein, mitochondrial [OS=Homo sapiens]	1	1409.76	0.711	114.8	85.2	133.1	105.9	111.8	94.6	83	71.6	87754.4	69866.3	73764	62365.5	54729	47216.5	18925.1	17174.8	19160.9	62365.5	32616.6	17812.2	High	High	High	High	High	High	High	0.0008826	8.211e-05	2.66	36.77
[K].AVGKVIPELNGK.[L]	1xBiotin [K4]	2	6	P04406-1	P04406-1 [216-227]	P04406-1 1xBiotin [K219]	glyceraldehyde-3-phosphate dehydrogenase [OS=Homo sapiens]	1	1450.81	0.705	116.6	83.4	110.5	107.5	139.2	98.2	79	65.6	36832.7	35830.6	46403.1	32734.1	26341.7	21878.8	7943.34	8808	12053.7	32734.1	15698.8	8253.68	High	High	Peak Found	High	High	Peak Found	High	0.0008826	0.0001263	2.79	43.19
[R].MVVPAALKVVR.[L]	1xBiotin [K8]; 1xOxidation [M1]	2	1	P40429	P40429 [118-128]	P40429 1xBiotin [K125]	60S ribosomal protein L13a [OS=Homo sapiens]	1	1424.81	0.701	117.6	82.4	123.4	201.5	35	86.5	87.6	66	9014.49	14721.9	2557.31	6316.62	6396.49	4824.01	1944.06	3618.99		6316.62	3812.09		Peak Found	Peak Found	Not Found	High	Peak Found	Not Found	High	0.001693	0.01994	1.78	44.96
[R].KEFSPFGTITSAK.[V]	1xBiotin [K1]	2	1	P11940-1	P11940-1 [312-324]	P11940-1 1xBiotin [K312]	Polyadenylate-binding protein 1 [OS=Homo sapiens]	1	1638.82	0.699	117.7	82.3	101.6	25.7	226.2	128.1	71	47.4	10326	2612.02	22991.8	13020.3	7219.33	4813.38	2226.91		5972.36	13020.3	4302.47		Peak Found	Not Found	Peak Found	High	Peak Found	Not Found	High	0.0009289	0.003984	2.33	48.38
[R].MVVPAALKVVR.[L]	1xBiotin [K8]	2	2	P40429	P40429 [118-128]	P40429 1xBiotin [K125]	60S ribosomal protein L13a [OS=Homo sapiens]	1	1408.82	0.691	132.4	67.6	50.1	128.4	177.8	143.6	65.5	34.6	3034.42	7769.17	10760.5	8690.26	3965.49	2096.14		1909.84	2795.16	8690.26	2363.29		Not Found	Peak Found	High	High	Peak Found	Not Found	High	0.0009289	0.008625	2.11	49.59
[R].SIGAAAKSQVISNAK.[N]	1xBiotin [K7]	2	1	P34932	P34932 [47-61]	P34932 1xBiotin [K53]	Heat shock 70 kDa protein 4 [OS=Homo sapiens]	1	1670.89	0.684	118.7	81.3	78.2	127.6	116.1	148.5	79.5	50	3561.65	5812.01	5288.73	6762.47	3618.8	2279.15				6762.47			Not Found	Not Found	Not Found	High	Not Found	Not Found	High	0.0009289	0.00525	2.28	39.35
[K].TKEPVKK.[I]	1xBiotin [K6]	4	2	Q14103	Q14103 [177-183]	Q14103 1xBiotin [K182]	heterogeneous nuclear ribonucleoprotein D0 [OS=Homo sapiens]	2	1055.59	0.683	118.8	81.2	45.3	155.1	136.4	93.2	103.4	66.5	5133.9	17562.3	15447.8	10548.5	11708.7	7528.27		4317.22	4012.71	10548.5	6977.97	2840.01	Not Found	Peak Found	Peak Found	High	High	Peak Found	High	0.0009289	0.01119	2.09	17.16
[R].LKNITLDDASAPR.[L]	1xBiotin [K2]	4	1	O75534	O75534 [757-769]	O75534 1xBiotin [K758]	cold shock domain-containing protein E1 [OS=Homo sapiens]	1	1639.85	0.68	119	81	95.2	133.9	103.7	138.7	70.6	57.8	3922.4	5518.65	4274.68	5716.67	2907.11	2382.57				5716.67			Not Found	Not Found	Not Found	High	Not Found	Not Found	High	0.00223	0.0264	1.87	41.14
[R].EANQAINPKLLQLVEDR.[G]	1xBiotin [K9]	2	8	P17844	P17844 [462-478]	P17844 1xBiotin [K470]	probable ATP-dependent RNA helicase DDX5 [OS=Homo sapiens]	1	2177.14	0.668	119.9	80.1	67.3	110.3	217.6	73.7	75.5	55.7	15940	26104	51527.6	17440	17866	13184.3	3437.62	6416.97	13384.8	17440	10647.5	4973.73	High	High	High	High	High	High	High	0.0008826	0.0001486	3.58	55.74
[K].GQPLCVLSAMKMETVVTSPMEGTVR.[K]	1xBiotin [K11]; 1xCarbamidomethyl [C5]; 3xOxidation [M10; M12; M20]	1	30	P11498	P11498 [1134-1158]	P11498 1xBiotin [K1144]	pyruvate carboxylase, mitochondrial [OS=Homo sapiens]	1	2995.41	0.668	119.9	80.1	130.8	201.9	46.8	35.4	87.3	97.8	1.04282e+06	1.61039e+06	373381	282273	696136	779812	224894	395872	96989.4	282273	414873	294181	High	High	High	High	High	High	High	0.0008826	5.467e-06	5.21	47.07
[R].ITLSKHQNVQLPR.[E]	1xBiotin [K5]	3	3	P26599	P26599 [406-418]	P26599 1xBiotin [K410]	Polypyrimidine tract-binding protein 1 [OS=Homo sapiens]	1	1759.96	0.667	120	80	67.9	133.5	165.8	30.1	89	113.6	262008	515010	639791	116246	343407	438310	56504.7	126601	166192	116246	204659	165351	Peak Found	Peak Found	Peak Found	High	High	Peak Found	High	0.0008826	0.0001629	2.3	38.88
[R].YESLTDPSKLDSGK.[E]	1xBiotin [K9]	5	2	P07900; P08238	P07900 [61-74]; P08238 [56-69]	P07900 1xBiotin [K69]; P08238 1xBiotin [K64]	Heat shock protein HSP 90-alpha [OS=Homo sapiens] Heat shock protein HSP 90-beta [OS=Homo sapiens]	1	1765.83	0.661	127.5	72.5	87.8	108.8	116.5	167	61.9	58	3876.75	4803.86	5144.03	7375.61	2734.28	2562.39				7375.61			Not Found	Not Found	Not Found	High	High	Not Found	High	0.0009289	0.003824	3.16	39.78
[K].LKMAPVPLDDSNRPASLTK.[D]	1xBiotin [K2]; 1xOxidation [M3]	4	1	Q9NYF8-1	Q9NYF8-1 [549-567]	Q9NYF8-1 1xBiotin [K550]	Bcl-2-associated transcription factor 1 [OS=Homo sapiens]	1	2295.18	0.654	120.9	79.1	271	109.2	34.3	41.7	72.4	71.4	22431	9037.71	2839.09	3447.8	5989.88	5910.74	4837.47	2221.68		3447.8	3569.76		Peak Found	Peak Found	Not Found	Peak Found	High	Not Found	High	0.002374	0.03409	2.3	38.33
[R].QYAKDIGFIK.[LK]	1xBiotin [K4]	2	1	P62273-1	P62273-1 [45-54]	P62273-1 1xBiotin [K48]	40S ribosomal protein S29 [OS=Homo sapiens]	1	1408.73	0.632	122.5	77.5	118.8	132.5	93.1	75.1	122.1	58.4	5137.12	5727.79	4026.1	3248.42	5277.27	2526.14				3248.42			Not Found	Not Found	Not Found	High	Not Found	Not Found	High	0.002077	0.0209	1.98	45.37
[R].ISVYYNEATGGKYVPR.[A]	1xBiotin [K12]	1	12	P07437	P07437 [47-62]	P07437 1xBiotin [K58]	tubulin beta chain [OS=Homo sapiens]	1	2043	0.629	122.7	77.3	142	110.2	117.8	85.7	74.1	70.2	175223	135912	145272	105779	91427.9	86618.3	37788.6	33410.4	37736	105779	54487.9	32676.4	High	High	High	High	High	High	High	0.0008826	3.89e-05	3.97	43.11
[K].AGDSLMVMIAMKMEHTIK.[S]	1xBiotin [K]; 3xOxidation [M8; M11; M]	1	8	Q96RQ3	Q96RQ3 [670-687]	Q96RQ3 1xBiotin [K]	Methylcrotonoyl-CoA carboxylase subunit alpha, mitochondrial [OS=Homo sapiens]	1	2280.06	0.628	111.4	88.6	157	96.2	108.4	53.5	98.6	86.3	82132.1	50302.5	56708.8	27971.3	51579.3	45121.2	17712.6	12365.5	14730.7	27971.3	30739.5	17021.8	High	High	High	High	High	High	High	0.0008826	5.955e-05	3.69	54.42
[K].HAAENPGKYNILGTNTIMDK.[M]	1xBiotin [K8]; 1xOxidation [M18]	2	4	Q00839	Q00839 [517-536]	Q00839 1xBiotin [K524]	Heterogeneous nuclear ribonucleoprotein U [OS=Homo sapiens]	1	2429.16	0.624	131.1	68.9	146.9	141.4	89	74.3	91.7	56.8	36790	35421.9	22280.2	18604.1	22969.3	14222.4	7934.12	8707.53	5787.51	18604.1	13688.9	5365.35	High	High	Peak Found	High	High	Peak Found	High	0.0009289	0.01442	3.48	41.69
[K].LDVQFSGLTKGDAVR.[D]	1xBiotin [K10]	2	9	P21333	P21333 [907-921]	P21333 1xBiotin [K916]	Filamin-A [OS=Homo sapiens]	1	1831.94	0.624	120.6	79.4	151.7	111.4	112.5	80.8	69.6	74	106116	77983.4	78723.8	56546.8	48679.7	51792.4	22884.9	19170.1	20449.3	56546.8	29011.4	19538.5	High	High	High	High	High	High	High	0.0008826	1.916e-05	2.98	48.17
[-].MPFSNSHNALKLR.[F]	1xBiotin [K11]; 1xMet-loss [N-Term]	1	3	P12277	P12277 [1-13]	P12277 1xBiotin [K11]; 1xMet-loss [N-Term]	Creatine kinase B-type [OS=Homo sapiens]	1	1609.83	0.603	124.8	75.2	66	138.6	177.8	88	83.6	46.1	5714.42	12001.5	15404.3	7620.99	7239.06	3989.47		2950.24	4001.43	7620.99	4314.23		Not Found	High	Peak Found	High	High	Not Found	High	0.0009289	0.006587	2.26	34.71
[R].INVYYNEATGGKYVPR.[A]	1xBiotin [K12]	1	11	P68371	P68371 [47-62]	P68371 1xBiotin [K58]	Tubulin beta-4B chain [OS=Homo sapiens]	1	2070.01	0.602	124.8	75.2	151.6	109.6	119.5	75.5	71.9	71.9	87823.2	63494.3	69235.8	43760.9	41681.2	41647.2	18939.9	15608.4	17984.7	43760.9	24840.6	15711.2	High	High	High	High	High	High	High	0.0008826	7.662e-06	4.05	43.11
[R].RPDQQLQGEGKIIDR.[R]	1xBiotin [K11]	4	11	Q8NC51-1	Q8NC51-1 [112-126]	Q8NC51-1 1xBiotin [K122]	Plasminogen activator inhibitor 1 RNA-binding protein [OS=Homo sapiens]	1	1979.01	0.601	124.9	75.1	132.1	122.8	124.3	62.8	74.7	83.3	122770	114076	115523	58320.9	69441.7	77439.8	26476.6	28042.4	30008.2	58320.9	41384.9	29213.8	High	High	High	High	High	High	High	0.0008826	2.499e-05	3.99	34.92
[-].MAAVKTLNPK.[A]	1xBiotin [K5]; 1xMet-loss+Acetyl [N-Term]	2	1	P40227-1	P40227-1 [1-10]	P40227-1 1xBiotin [K5]; 1xMet-loss+Acetyl [N-Term]	T-complex protein 1 subunit zeta [OS=Homo sapiens]	1	1209.67	0.6	125	75	142.5	134.3	118.4	25.2	99	80.6	316121	298065	262713	55839.4	219632	178908	68174.7	73271.3	68242.3	55839.4	130893	67492.3	Peak Found	Peak Found	Peak Found	High	Peak Found	Peak Found	High	0.0009289	0.006422	2.1	40.47
[K].KLVWIPSER.[H]	1xBiotin [K1]	5	4	P35580	P35580 [34-42]	P35580 1xBiotin [K34]	Myosin-10 [OS=Homo sapiens]	1	1353.73	0.598	125.2	74.8	177.4	41.7	131.6	100.5	70.1	78.7	19438	4574.24	14415.9	11007.5	7682.74	8619.82	4192		3744.68	11007.5	4578.64	3251.79	High	Not Found	High	High	High	Peak Found	High	0.0009289	0.003601	2.15	47.86
[K].DKGLQTSQDAR.[F]	1xBiotin [K2]	1	1	P27797	P27797 [63-73]	P27797 1xBiotin [K64]	Calreticulin [OS=Homo sapiens]	1	1444.68	0.595	125.4	74.6	106	110	104.5	165.3	51.1	63.1	5562.65	5770.54	5483.96	8672.82	2679.31	3309.26				8672.82			Not Found	Not Found	Not Found	High	Not Found	Not Found	High	0.0009289	0.003061	2.54	28.29
[K].EITALAPSTMKIK.[I]	1xBiotin [K]; 1xOxidation [M10]	7	10	P60709	P60709 [316-328]	P60709 1xBiotin [K]	Actin, cytoplasmic 1 [OS=Homo sapiens]	1	1644.87	0.592	126.4	73.6	137.2	146.3	72.8	77.2	86.6	79.9	198060	211141	105012	111446	124998	115276	42713.6	51903.4	27278	111446	74494.6	43487.5	High	High	Peak Found	High	High	High	High	0.0008826	7.023e-05	3.19	40.41
[K].AGDSLMVMIAMKMEHTIK.[S]	1xBiotin [K12]; 1xOxidation [M11]	1	1	Q96RQ3	Q96RQ3 [670-687]	Q96RQ3 1xBiotin [K681]	Methylcrotonoyl-CoA carboxylase subunit alpha, mitochondrial [OS=Homo sapiens]	1	2248.07	0.589	125.8	74.2	27.5	63.2	385.7	55.6	30.7	37.3	2204.16	5058.52	30864.4	4452.25	2454.84	2981.4			8017.34				Not Found	Not Found	High	Not Found	Not Found	Not Found	High	0.0009289	0.01026	2.85	55.45
[K].TAASAPANVSKGTTPLAPPPKPVR.[R]	1xBiotin [K11]	4	11	Q96D71	Q96D71 [681-704]	Q96D71 1xBiotin [K691]	RalBP1-associated Eps domain-containing protein 1 [OS=Homo sapiens]	1	2554.38	0.578	132.1	67.9	157.3	97	127.6	90.9	61.8	65.5	58514.8	36068.8	47450.9	33803.7	22978.9	24381.3	12619.3	8866.56	12325.9	33803.7	13694.6	9197.75	High	High	High	High	High	High	High	0.0008826	0.000758	3.14	35.71
[K].NSQKIDR.[L]	1xBiotin [K4]	1	1	O76003	O76003 [93-99]	O76003 1xBiotin [K96]	glutaredoxin-3 [OS=Homo sapiens]	1	1086.54	0.574	128.5	71.5	105.6	116.6	118.3	133.9	65	60.6	3914.65	4323.12	4386.63	4963.14	2407.82	2247.65				4963.14	1434.98		Not Found	Not Found	Not Found	High	Peak Found	Not Found	High	0.0009289	0.007898	1.76	22.91
[K].GQEVSPKVYFMK.[Q]	1xBiotin [K7]	1	3	P09936	P09936 [72-83]	P09936 1xBiotin [K78]	Ubiquitin carboxyl-terminal hydrolase isozyme L1 [OS=Homo sapiens]	1	1638.8	0.566	117.7	82.3	100.3	53	223.3	126.5	70.1	26.8	10326	5459.64	22991.8	13020.3	7219.33	2756.71	2226.91		5972.36	13020.3	4302.47		Peak Found	Not Found	High	High	High	Not Found	High	0.0009289	0.00656	3.19	48.38
[K].LLQKGIHPTIISESFQK.[A]	1xBiotin [K4]	2	4	P50991	P50991 [123-139]	P50991 1xBiotin [K126]	T-complex protein 1 subunit delta [OS=Homo sapiens]	1	2165.18	0.566	127.7	72.3	141.2	123	107.8	97.5	69.6	60.9	44591.8	38825.8	34045.9	30795.7	21973.5	19221.6	9616.66	9544.28	8843.77	30795.7	13095.4	7251.25	High	High	Peak Found	High	High	Peak Found	High	0.0008826	0.000274	3	45.99
[K].SPAKSPNPSTPR.[G]	1xBiotin [K4]	2	2	O76021	O76021 [392-403]	O76021 1xBiotin [K395]	Ribosomal L1 domain-containing protein 1 [OS=Homo sapiens]	1	1464.73	0.56	128.2	71.8	125	136.8	132.5	81.1	74.3	50.3	14957.4	16376.7	15865.7	9710.39	8888.99	6019.37	3225.72	4025.77	4121.28	9710.39	5297.53	2270.78	Peak Found	Peak Found	Peak Found	High	High	Peak Found	High	0.0008826	0.0005812	2.12	24.91
[K].KLVWVPSDK.[S]	1xBiotin [K1]	1	7	P35579-1	P35579-1 [30-38]	P35579-1 1xBiotin [K30]	Myosin-9 [OS=Homo sapiens]	1	1297.7	0.55	129	71	156.7	105.8	124.1	83	68.3	62.1	78483.2	52980.3	62154	41572.7	34200.3	31098.8	16925.7	13023.8	16145.1	41572.7	20382.2	11731.9	High	High	High	High	High	High	High	0.0008826	0.0005956	2.51	44.2
[K].GQPLCVLSAMKMETVVTSPMEGTVR.[K]	1xBiotin [K11]; 1xCarbamidomethyl [C5]; 2xOxidation [M12; M]	1	53	P11498	P11498 [1134-1158]	P11498 1xBiotin [K1144]	pyruvate carboxylase, mitochondrial [OS=Homo sapiens]	1	2979.41	0.546	127.3	72.7	116.4	130.8	147	50.9	80.2	74.6	605398	679981	764261	264719	417119	387943	130560	167155	198524	264719	248588	146350	High	High	High	High	High	High	High	0.0008826	2.075e-05	4.13	56.28
[K].KSDIDEIVLVGGSTR.[I]	1xBiotin [K1]	1	1	P11021	P11021 [353-367]	P11021 1xBiotin [K353]	78 kDa glucose-regulated protein [OS=Homo sapiens]	1	1814.93	0.539	130	70	118.1	124	100.9	146.7	46.7	63.6	5181.97	5442.39	4425.77	6437.46	2050.88	2791.44				6437.46			Not Found	Not Found	Not Found	High	Not Found	Not Found	High	0.0008826	6.772e-06	2.67	48.14
[R].VTGTNKGISPVPINLR.[V]	1xBiotin [K6]	9	13	P50570-1	P50570-1 [108-123]	P50570-1 1xBiotin [K113]	Dynamin-2 [OS=Homo sapiens]	1	1892.04	0.532	130.6	69.4	145.4	132	107.7	75.4	69.4	70.1	93957	85269.7	69566.8	48693.2	44871.3	45321.2	20262.8	20961.3	18070.7	48693.2	26741.7	17097.2	High	High	High	High	High	High	High	0.0008826	0.0001364	3.82	45.88
[K].ENIYEVCKSK.[D]	1xBiotin [K8]; 1xCarbamidomethyl [C7]	1	1	Q8N9V7	Q8N9V7 [999-1008]	Q8N9V7 1xBiotin [K1006]	Testis- and ovary-specific PAZ domain-containing protein 1 [OS=Homo sapiens]	1	1495.69	0.519	131.7	68.3	224.9	103.9	92.1	49.9	53.9	75.3	67026.4	30970.7	27455.9	14856.8	16064.6	22425.9	14454.9	7613.31	7131.93	14856.8	9573.97	8460.07	Peak Found	Peak Found	Peak Found	High	Peak Found	Peak Found	High	0.002374	0.03185	2.25	36.41
[K].EITALAPSTMKIK.[I]	1xBiotin [K]	7	8	P60709	P60709 [316-328]	P60709 1xBiotin [K]	Actin, cytoplasmic 1 [OS=Homo sapiens]	1	1628.88	0.512	142.4	57.6	124	72.4	204.2	104.5	44.6	50.1	96093.3	56122.9	158237	80987.2	34590.1	38845.4	20723.5	13796.3	41103.6	80987.2	20614.5	14654.3	High	High	High	High	High	High	High	0.0008826	2.865e-05	3.81	45.21
[K].FGKHGGTIPIVPTAEFQDR.[I]	1xBiotin [K3]	3	1	P00367	P00367 [478-496]	P00367 1xBiotin [K480]	Glutamate dehydrogenase 1, mitochondrial [OS=Homo sapiens]	1	2296.15	0.511	153.5	46.5	208.9	169.4	30.2	106.7	51.3	33.6	21215.2	17201.6	3063.1	10832.3	5210.75	3412.75	4575.27	4228.54		10832.3			Peak Found	Peak Found	Not Found	High	Not Found	Not Found	High	0.001298	0.01755	2.93	46.73
[K].AENKGISPVVSEHR.[K]	1xBiotin [K4]	4	7	Q99700-1	Q99700-1 [778-791]	Q99700-1 1xBiotin [K781]	Ataxin-2 [OS=Homo sapiens]	1	1748.87	0.506	135.7	64.3	112.6	150.2	135.1	64.1	76	62	53863.2	71839.2	64636.8	30639.6	36344.4	29649.9	11616.1	17659.7	16790.1	30639.6	21660	11185.3	High	High	High	High	High	High	High	0.0008826	6.676e-06	3.04	32.37
[K].EAAGKSSGPTSLFAVTVAPPGAR.[Q]	1xBiotin [K5]	2	18	Q00839	Q00839 [182-204]	Q00839 1xBiotin [K186]	Heterogeneous nuclear ribonucleoprotein U [OS=Homo sapiens]	1	2397.22	0.505	132.9	67.1	132.5	140.4	126.4	66.8	66.8	67.1	161302	170927	153873	81383.4	81392.5	81764.4	34786.3	42017.7	39970	81383.4	48507.1	30845.3	High	High	High	High	High	High	High	0.0008826	4.053e-05	4.16	51.06
[R].QQEGFKGTFPDAR.[E]	1xBiotin [K6]	2	12	Q15233	Q15233 [366-378]	Q15233 1xBiotin [K371]	Non-POU domain-containing octamer-binding protein [OS=Homo sapiens]	1	1706.8	0.494	133.5	66.5	205.9	108.3	108.5	69.6	53.5	54.1	121540	63916.6	64070.9	41101.5	31602.6	31918	26211.3	15712.2	16643	41101.5	18834	12040.9	High	High	High	High	High	High	High	0.0008826	0.0005244	3.22	41.06
[K].VIPELNGKLTGMAFR.[V]	1xBiotin [K8]; 1xOxidation [M12]	2	6	P04406-1	P04406-1 [220-234]	P04406-1 1xBiotin [K227]	glyceraldehyde-3-phosphate dehydrogenase [OS=Homo sapiens]	1	1887.98	0.485	134.7	65.3	135.9	151	123.2	49.3	74.7	65.8	81017.8	90054.5	73451.1	29399.6	44566.9	39257.5	17472.3	22137.5	19079.7	29399.6	26560.3	14809.7	High	High	Peak Found	High	Peak Found	High	High	0.0009289	0.003531	1.86	51.27
[R].ILLQSKNAGAVIGK.[G]	1xBiotin [K6]	3	6	P61978	P61978 [47-60]	P61978 1xBiotin [K52]	Heterogeneous nuclear ribonucleoprotein K [OS=Homo sapiens]	1	1637.94	0.479	133.2	66.8	173.5	120.3	111.1	83	60.3	51.7	77760.7	53900.9	49807.7	37220.7	27032.8	23189.1	16769.9	13250.1	12938.1	37220.7	16110.6	8748	High	High	High	High	High	High	High	0.0008826	2.868e-06	4.38	42.94
[K].IKTLFPLIEAK.[K]	1xBiotin [K2]	1	6	P13010	P13010 [533-543]	P13010 1xBiotin [K534]	X-ray repair cross-complementing protein 5 [OS=Homo sapiens]	1	1498.87	0.475	134	66	160.5	121.9	124.1	76.2	56.2	61.1	75101	57044.5	58102.8	35674.8	26283.7	28617.6	16196.3	14022.9	15092.8	35674.8	15664.2	10795.9	High	High	High	High	High	High	High	0.0008826	7.433e-05	3.2	57.02
[R].GAPLAKVVFR.[D]	1xBiotin [K6]	1	4	P62917	P62917 [55-64]	P62917 1xBiotin [K60]	60S ribosomal protein L8 [OS=Homo sapiens]	1	1283.73	0.462	136.8	63.2	155.7	122.2	114.2	107.8	56.4	43.7	31861.4	25003.7	23366.6	22059.7	11540.6	8944.36	6871.23	6146.5	6069.72	22059.7	6877.81	3374.22	High	High	High	High	Peak Found	Peak Found	High	0.0009289	0.005534	2.3	48.05
[K].VTQQGLKMVVPGLDGAQIPR.[D]	1xBiotin [K7]; 1xOxidation [M8]	1	5	P49327	P49327 [1152-1171]	P49327 1xBiotin [K1158]	Fatty acid synthase [OS=Homo sapiens]	1	2349.24	0.447	138.2	61.8	144	170.4	100.8	46.6	73.9	64.4	27872.7	32968	19511.9	9009.3	14295.6	12455.4	6011.02	8104.31	5068.42	9009.3	8519.67	4698.74	High	High	High	Peak Found	High	High	High	0.0008826	6.947e-05	3.03	49.77
[K].HAAENPGKYNILGTNTIMDK.[M]	1xBiotin [K8]	2	2	Q00839	Q00839 [517-536]	Q00839 1xBiotin [K524]	Heterogeneous nuclear ribonucleoprotein U [OS=Homo sapiens]	1	2413.16	0.408	142	58	89.5	41.3	310.8	98.5	36.5	23.5	10535.7	4858.42	36581.8	11593.2	4298.39	2762.01	2272.13		9502.5	11593.2			Peak Found	Not Found	High	High	Not Found	Not Found	High	0.0009289	0.004935	2.98	45.62
[K].AGDSLMVMIAMKMEHTIK.[S]	1xBiotin [K]; 2xOxidation [M]	1	6	Q96RQ3	Q96RQ3 [670-687]	Q96RQ3 1xBiotin [K]	Methylcrotonoyl-CoA carboxylase subunit alpha, mitochondrial [OS=Homo sapiens]	1	2264.06	0.405	142.3	57.7	48.7	14.4	446.6	61.6	9	19.7	17042.2	5022.52	156284	21567.8	3136.29	6906.62	3675.32		40596.3	21567.8		2605.49	Peak Found	Not Found	High	High	Not Found	Peak Found	High	0.0008826	0.001906	2.64	54.44
[R].SGGYSSGKQGR.[S]	1xBiotin [K8]	5	8	Q15084-1	Q15084-1 [143-153]	Q15084-1 1xBiotin [K150]	Protein disulfide-isomerase A6 [OS=Homo sapiens]	1	1309.6	0.392	143.6	56.4	158	139.6	133.8	54.7	51.3	62.6	156124	137922	132235	54103.4	50742.2	61831.7	33669.8	33904.4	34349.4	54103.4	30240.6	23325.8	High	High	High	High	High	High	High	0.0008826	0.001161	2.16	21.91
[K].TFGKAAGPSLSHTSGGTQSK.[V]	1xBiotin [K4]	1	3	P27694	P27694 [164-183]	P27694 1xBiotin [K167]	Replication protein A 70 kDa DNA-binding subunit [OS=Homo sapiens]	1	2145.04	0.378	145.4	54.6	153	118.2	158.1	59.8	57.4	53.5	41899.1	32382.7	43292	16373.3	15730.1	14649.6	9035.95	7960.41	11245.5	16373.3	9374.59	5526.51	Peak Found	High	Peak Found	High	Peak Found	High	High	0.0008826	0.0003115	3.13	32.38
[K].LFDSTTLEHQKTFR.[T]	1xBiotin [K11]	1	3	Q13347	Q13347 [214-227]	Q13347 1xBiotin [K224]	Eukaryotic translation initiation factor 3 subunit I [OS=Homo sapiens]	1	1948.96	0.374	145.5	54.5	188.2	135.2	107.8	68.1	50.1	50.6	95639	68713.1	54776.5	34604	25471.3	25727.9	20625.5	16891.3	14228.7	34604	15180	9705.72	High	High	Peak Found	High	Peak Found	Peak Found	High	0.0008826	0.0003139	3.43	42.76
[K].KFVPDYYK.[VM]	1xBiotin [K1]	11	1	Q8IZX4	Q8IZX4 [1554-1561]	Q8IZX4 1xBiotin [K1554]	transcription initiation factor TFIID subunit 1-like [OS=Homo sapiens]	1	1285.63	0.367	135.3	64.7	207.9	105.4	124.1	27	76.2	59.4	30766.3	15595.9	18364.1	3989.61	11278.2	8781.64	6635.05	3833.84	4770.25		6721.42	3312.83	Peak Found	Peak Found	Peak Found	Not Found	High	Peak Found	High	0.00223	0.02888	1.78	40.5
[R].CDVIAQGIVMAVK.[D]	1xBiotin [K13]; 1xCarbamidomethyl [C1]	2	1	Q9P2R7	Q9P2R7 [384-396]	Q9P2R7 1xBiotin [K396]	Succinate--CoA ligase [ADP-forming] subunit beta, mitochondrial [OS=Homo sapiens]	0	1629.82	0.364	146.6	53.4	446.4	68.6	14.3	25.3	25	20.3	77536.5	11912.7	2481.22	4399.04	4341.78	3534.14	16721.5	2928.41		4399.04			High	Peak Found	Not Found	Peak Found	Not Found	Not Found	High	0.001298	0.01715	1.62	6.42
[K].VVGAKVVTNAR.[S]	1xBiotin [K5]	5	4	Q15424-1	Q15424-1 [432-442]	Q15424-1 1xBiotin [K436]	Scaffold attachment factor B1 [OS=Homo sapiens]	1	1339.75	0.35	148.2	51.8	162.5	150.5	131.2	52.6	46	57.3	22156.5	20523	17886.2	7176.35	6267.11	7807.89	4778.28	5045.02	4646.11	7176.35	3734.98	2945.49	High	High	High	High	Peak Found	Peak Found	High	0.0008826	0.001608	2.43	32.48
[K].TADEVPLKILAHNNFVGR.[L]	1xBiotin [K8]	1	5	Q9NZI8	Q9NZI8 [273-290]	Q9NZI8 1xBiotin [K280]	Insulin-like growth factor 2 mRNA-binding protein 1 [OS=Homo sapiens]	1	2220.16	0.35	148.2	51.8	109.3	149.1	190.4	53.4	52.2	45.6	79849.1	108903	139025	38978.4	38106.4	33292.9	17220.2	26771	36113	38978.4	22710.1	12559.6	High	High	High	High	High	Peak Found	High	0.0008826	0.0001691	3.04	53.27
[K].LAEEIPLKILAHNGLVGR.[L]	1xBiotin [K8]	6	4	Q9Y6M1	Q9Y6M1 [271-288]	Q9Y6M1 1xBiotin [K278]	Insulin-like growth factor 2 mRNA-binding protein 2 [OS=Homo sapiens]	1	2169.22	0.339	149.3	50.7	105.4	129.9	227.8	38.1	54.8	44.1	17661	21769.1	38184.4	6384.71	9190.64	7387.68	3808.77	5351.35	9918.77	6384.71	5477.3	2786.97	Peak Found	High	High	High	High	Peak Found	High	0.0009289	0.00375	2.79	57.09
[R].GFPTIKIFQK.[G]	1xBiotin [K6]	5	2	Q15084-1	Q15084-1 [236-245]	Q15084-1 1xBiotin [K241]	Protein disulfide-isomerase A6 [OS=Homo sapiens]	1	1404.77	0.339	148.7	51.3	190.4	135	131.2	64.5	32.4	46.5	22745.6	16122.5	15679.2	7702.26	3871.14	5560.86	4905.32	3963.28	4072.82	7702.26			Peak Found	Peak Found	High	High	Not Found	Not Found	High	0.0009289	0.00631	2.05	53.16
[K].VIPELNGKLTGMAFR.[V]	1xBiotin [K8]	2	5	P04406-1	P04406-1 [220-234]	P04406-1 1xBiotin [K227]	glyceraldehyde-3-phosphate dehydrogenase [OS=Homo sapiens]	1	1871.99	0.337	149.6	50.4	98.9	10.7	356.9	76.9	33.4	23.1	19280.7	2093.45	69546.6	14992.2	6502.09	4499.62	4158.08		18065.4	14992.2	3875.02		High	Not Found	High	High	High	Not Found	High	0.0008826	0.0001194	2.73	55.5
[K].GFGGKFGVQTDR.[Q]	1xBiotin [K5]	3	9	Q14247-1	Q14247-1 [231-242]	Q14247-1 1xBiotin [K235]	Src substrate cortactin [OS=Homo sapiens]	1	1494.72	0.332	150.2	49.8	193.1	139	120.6	57.1	46.1	44.1	153170	110301	95691.5	45280.7	36592.9	35008.1	33032.6	27114.6	24856.8	45280.7	21808.1	13206.7	High	High	High	High	High	High	High	0.0008826	0.0003275	2.05	42.61
[K].LQALKDTANR.[L]	1xBiotin [K5]	2	3	P29401	P29401 [12-21]	P29401 1xBiotin [K16]	Transketolase [OS=Homo sapiens]	1	1355.71	0.325	147.4	52.6	207.7	134.8	116.8	67.6	24.9	48.1	23374	15175.9	13146.1	7607.64	2807.77	5418.96	5040.84	3730.58	3414.83	7607.64			High	Peak Found	High	High	Not Found	Not Found	High	0.00223	0.02405	2.2	32.86
[R].NIGKTLVTR.[T]	1xBiotin [K4]	1	1	P61247	P61247 [43-51]	P61247 1xBiotin [K46]	40S ribosomal protein S3a [OS=Homo sapiens]	1	1227.69	0.321	151.4	48.6	184.1	120.1	121.8	115.1	19.8	39.1	24720.4	16129.2	16355	15450.7	2656.55	5246.18	5331.19	3964.93	4248.38	15450.7			Peak Found	Peak Found	Peak Found	High	Not Found	Not Found	High	0.00223	0.02446	2	37.29
[R].GFGGKFGVQMDR.[V]	1xBiotin [K5]	3	3	Q14247-1	Q14247-1 [120-131]	Q14247-1 1xBiotin [K124]	Src substrate cortactin [OS=Homo sapiens]	1	1524.71	0.292	154.8	45.2	179.4	37.6	231.2	52.4	52.6	46.7	16756.4	3513.71	21595.2	4893.74	4912.91	4362.11	3613.68		5609.56	4893.74			High	Not Found	High	High	Not Found	Not Found	High	0.0008826	0.002035	2.63	46.34
[K].TGFGGKFGVQSER.[Q]	1xBiotin [K6]	1	6	Q14247-1	Q14247-1 [267-279]	Q14247-1 1xBiotin [K272]	Src substrate cortactin [OS=Homo sapiens]	1	1595.76	0.29	154.1	45.9	208.5	127.8	141.1	43.6	37	42	61769.4	37853.7	41808.2	12931.4	10963	12450.1	13321.2	9305.31	10860.1	12931.4	6533.58	4696.74	High	High	High	High	High	High	High	0.0008826	2.573e-05	3.48	42.73
[K].ANVGAGKK.[KM-]	1xBiotin [K]	3	3	P62847-4	P62847-4 [123-130]	P62847-4 1xBiotin [K]	Isoform 4 of 40S ribosomal protein S24 [OS=Homo sapiens]	1	970.514	0.242	161	39	150.5	186.3	159.2	45.9	38.6	19.5	40771.5	50469.2	43107.8	12429.5	10445.6	5288.43	8792.78	12406.5	11197.7	12429.5	6225.23		High	High	Peak Found	High	Peak Found	Not Found	High	0.0009289	0.01302	1.8	20.42
[K].GKSADFTNFDPR.[G]	1xBiotin [K2]	1	2	P00918	P00918 [170-181]	P00918 1xBiotin [K171]	Carbonic anhydrase 2 [OS=Homo sapiens]	1	1580.72	0.241	161.4	38.6	192.1	165.8	119.8	36.3	39.7	46.2	22397.3	19326.7	13961.8	4235.35	4628.37	5389.53	4830.19	4750.94	3626.72				High	High	Peak Found	Not Found	Not Found	Not Found	High	0.003241	0.04943	1.92	42.25
[K].HFEAKIEK.[H]	1xBiotin [K5]	1	4	P30533	P30533 [283-290]	P30533 1xBiotin [K287]	alpha-2-macroglobulin receptor-associated protein [OS=Homo sapiens]	1	1227.62	0.239	161.4	38.6	148	157	171	51.2	37.6	35.2	46192.4	49019	53364.7	15970.6	11737.9	10989.6	9961.85	12050	13862	15970.6	6995.39	4145.79	High	High	High	High	Peak Found	Peak Found	High	0.00223	0.02568	2.77	29.9
[R].STLNEIYFGKTK.[D]	1xBiotin [K10]	2	4	P47756-1	P47756-1 [226-237]	P47756-1 1xBiotin [K235]	F-actin-capping protein subunit beta [OS=Homo sapiens]	1	1626.82	0.231	162.5	37.5	191.6	95	180	71	41.5	20.9	25999.4	12887.4	24419.6	9625.97	5631.42	2833.06	5607.03	3168.03	6343.24	9625.97	3356.13		High	Peak Found	High	High	High	Not Found	High	0.0008826	0.001293	2.68	45.9
[K].ANPFGGASHAKGIVLEK.[V]	1xBiotin [K11]	1	4	P62266	P62266 [38-54]	P62266 1xBiotin [K48]	40S ribosomal protein S23 [OS=Homo sapiens]	1	1922	0.228	162.8	37.2	177.3	144.5	161.5	54.6	36.8	25.2	121549	99028.6	110679	37413.8	25254.6	17296.9	26213.2	24343.5	28750.1	37413.8	15050.9	6525.19	Peak Found	High	High	High	Peak Found	High	High	0.0008826	0.001896	2.38	42.37
[R].EMHKTLK.[L]	1xBiotin [K4]	3	3	Q96L93-1	Q96L93-1 [1226-1232]	Q96L93-1 1xBiotin [K1229]	Kinesin-like protein KIF16B [OS=Homo sapiens]	1	1112.56	0.224	163.4	36.6	150.9	70.1	269.1	33	33.8	43.1	2.51972e+06	1.17029e+06	4.49277e+06	550611	564423	720023	543401	287684	1.16704e+06	550611	336376	271626	Peak Found	Peak Found	High	Peak Found	High	Peak Found	High	0.00223	0.02756	1.73	21.85
[K].WGFTGQKTEEVK.[Q]	1xBiotin [K7]	2	2	Q9NYU2-1	Q9NYU2-1 [1238-1249]	Q9NYU2-1 1xBiotin [K1244]	UDP-glucose:glycoprotein glucosyltransferase 1 [OS=Homo sapiens]	1	1635.78	0.212	165.2	34.8	257	105.7	129.4	54.4	27.3	26.2	26458	10884.9	13325	5604.97	2807.48	2696.95	5705.92	2675.75	3461.29				High	Peak Found	High	Not Found	Not Found	Not Found	High	0.0008826	0.002651	1.99	42.59
[R].YYKNIGLGFK.[T]	1xBiotin [K3]	1	5	P62280	P62280 [36-45]	P62280 1xBiotin [K38]	40S ribosomal protein S11 [OS=Homo sapiens]	1	1428.73	0.206	165.9	34.1	181.6	166.5	147.8	39.5	34.2	30.4	30131.1	27639.9	24536.9	6547.95	5680.08	5039.21	6498.07	6794.53	6373.71	6547.95	3385.13		High	High	High	High	High	Not Found	High	0.0009289	0.002859	1.96	47.63
[R].LDPFADGGKTPDPK.[M]	1xBiotin [K9]	1	1	O75533-1	O75533-1 [133-146]	O75533-1 1xBiotin [K141]	splicing factor 3B subunit 1 [OS=Homo sapiens]	1	1683.8	0.204	167	33	124.7	192.1	182.4	25.7	36	39.1	42537.9	65543.3	62244.4	8775.4	12287.2	13356.4	9173.71	16112.1	16168.6	8775.4	7322.72	5038.64	Peak Found	High	Peak Found	Peak Found	Peak Found	Peak Found	High	0.0009289	0.003198	2.96	40.78
[K].AGIKTK.[N]	1xBiotin [K4]	1	3	Q7Z417	Q7Z417 [147-152]	Q7Z417 1xBiotin [K150]	Nuclear fragile X mental retardation-interacting protein 2 [OS=Homo sapiens]	1	843.476	0.194	167.8	32.2	152.6	173.3	175.6	33.2	35.7	29.6	66524.8	75569.2	76565.5	14484.3	15581.1	12924.6	14346.7	18576.7	19888.7	14484.3	9285.79	4875.74	High	Peak Found	High	Peak Found	High	Peak Found	High	0.003241	0.05053	1.5	23.05
[R].IVAPGKGILAADESTGSIAK.[R]	1xBiotin [K6]	2	16	P04075	P04075 [23-42]	P04075 1xBiotin [K28]	fructose-bisphosphate aldolase A [OS=Homo sapiens]	1	2124.14	0.193	168.3	31.7	190	150.8	156.3	44.3	29.1	29.4	210020	166699	172702	48906	32184.6	32542.5	45292.9	40978.5	44861	48906	19180.9	12276.5	High	High	High	High	High	High	High	0.0008826	2.38e-06	4.21	47.02
[K].IFQKGESPVDYDGGR.[T]	1xBiotin [K4]	5	1	Q15084-1	Q15084-1 [242-256]	Q15084-1 1xBiotin [K245]	Protein disulfide-isomerase A6 [OS=Homo sapiens]	1	1893.88	0.175	170.2	29.8	207.4	134.3	153.9	54	26.9	23.3	44657.5	28919.5	33138.4	11630.9	5795.77	5022.97	9630.83	7109.08	8608.03	11630.9			Peak Found	High	Peak Found	Peak Found	Not Found	Not Found	High	0.0008826	0.000363	2.33	40.8
[K].SSPLPAKGR.[D]	1xBiotin [K7]	1	1	Q7L2J0-1	Q7L2J0-1 [216-224]	Q7L2J0-1 1xBiotin [K222]	7SK snRNA methylphosphate capping enzyme [OS=Homo sapiens]	1	1138.6	0.164	171.9	28.1	201.2	149.4	165.1	24.3	27	32.9	185990	138138	152669	22496.5	25005.7	30447.4	40110.5	33957.6	39657.3	22496.5	14902.5	11486.2	High	Peak Found	Peak Found	Peak Found	Peak Found	Peak Found	High	0.002077	0.02046	1.99	31.16
[K].AIHNKVNIVPVIAK.[A]	1xBiotin [K5]	3	2	Q15019	Q15019 [170-183]	Q15019 1xBiotin [K174]	septin-2 [OS=Homo sapiens]	1	1742.01	0.14	175.4	24.6	173.2	163.1	185.2	24.3	22	32.2	31518.7	29685	33699.6	4413.05	4008.38	5860.86	6797.31	7297.27	8753.8	4413.05			High	Peak Found	High	Peak Found	Not Found	Not Found	High	0.0009289	0.007677	2.97	43.33
[K].GTLLGESLKLK.[V]	1xBiotin [K9]	2	3	O75663	O75663 [118-128]	O75663 1xBiotin [K126]	TIP41-like protein [OS=Homo sapiens]	1	1384.79	0.126	169.3	30.7	226.2	156.8	145.2	28.5	28.4	14.9	45935.7	31840.1	29477.2	5786.41	5769.59	3023.29	9906.48	7827.04	7657				High	High	High	Not Found	Not Found	Not Found	High	0.0009289	0.004267	2.51	48.13
[K].AAFQSQYKSHFVAASLSNQK.[A]	1xBiotin [K8]	2	2	Q86XP3-1	Q86XP3-1 [701-720]	Q86XP3-1 1xBiotin [K708]	ATP-dependent RNA helicase DDX42 [OS=Homo sapiens]	1	2438.19	0.068	191.5	8.5	102.2	235	227	10.1	18.8	6.9	59864.3	137694	132991	5916.79	11006.4	4047.16	12910.3	33848.4	34545.8	5916.79	6559.4		High	High	Peak Found	Peak Found	Peak Found	Not Found	High	0.0008826	5.411e-05	2.54	44.52
[K].LLIYDASKLASGVSSR.[F]	1xBiotin [K8]	1	6	AGIA	AGIA [70-85]	AGIA 1xBiotin [K77]	Light	1	1906.01	0.06	190.3	9.7	224.7	143.8	196.5	10	16.4	8.6	68331.8	43721.5	59768.7	3036.43	4994.03	2623.05	14736.4	10747.8	15525.5				High	High	High	Not Found	Not Found	Not Found	High	0.0008826	0.001189	2.63	51.72
[R].FTISKTSTTVDLR.[I]	1xBiotin [K5]	1	8	AGIA-fabID	AGIA-fabID [85-97]	AGIA-fabID 1xBiotin [K89]	Heavy	1	1694.88	0.008	198	2	295.7	142.5	157.1	2.1	1.1	1.6	588582	283597	312723	4081.78	2176.31	3112.02	126933	69714.8	81232.9				High	High	High	Not Found	Not Found	Not Found	High	0.0008826	2.17e-05	3.27	45.76
[K].VDKTVAPSTMK.[D]	1xBiotin [K3]	1	13	AGIA-fabID	AGIA-fabID [218-228]	AGIA-fabID 1xBiotin [K220]	Heavy	1	1402.71	0.003	199.5	0.5	174	92.6	332.1	0.5	0.3	0.5	1.99148e+06	1.05931e+06	3.79996e+06	5407.79	3388.99	5900.84	429482	260404	987078				High	High	High	Not Found	Not Found	Not Found	High	0.0008826	0.0001199	4.01	32.65
[K].VDKTVAPSTMK.[D]	1xBiotin [K3]; 1xOxidation [M10]	1	22	AGIA-fabID	AGIA-fabID [218-228]	AGIA-fabID 1xBiotin [K220]	Heavy	1	1418.7	0.001	199.8	0.2	237.2	228.4	133.7	0.2	0.3	0.2	3.95023e+06	3.80263e+06	2.22719e+06	3210.05	4412.41	3676.69	851905	934774	578535				High	High	High	Not Found	Not Found	Not Found	High	0.0008826	2.806e-05	3.97	28.03
[R].GAKAEEILEK.[G]	1xBiotin [K3]	2	1	P62913	P62913 [76-85]	P62913 1xBiotin [K78]	60S ribosomal protein L11 [OS=Homo sapiens]	1	1313.68																						Not Found	Not Found	Not Found	High	Not Found	Not Found	High	0.00223	0.02426	2.27
[R].GANLKDYYSR.[K]	1xBiotin [K5]	1	1	Q08211	Q08211 [142-151]	Q08211 1xBiotin [K146]	Atp-dependent rna helicase a [OS=Homo sapiens]	1	1412.66																						Not Found	Not Found	Not Found	High	Not Found	Not Found	High	0.001298	0.01654	2.31
[K].GESSGKNVTLPAVFK.[A]	1xBiotin [K6]	1	2	P36578	P36578 [15-29]	P36578 1xBiotin [K20]	60S ribosomal protein L4 [OS=Homo sapiens]	1	1759.9																						Not Found	Not Found	Not Found	High	Not Found	Not Found	High	0.0008826	0.0005413	2.28
[R].GFGFVLFKESESVDK.[V]	1xBiotin [K8]	4	1	Q14103	Q14103 [139-153]	Q14103 1xBiotin [K146]	heterogeneous nuclear ribonucleoprotein D0 [OS=Homo sapiens]	1	1914.93																						Not Found	Not Found	Not Found	High	Not Found	Not Found	High	0.00223	0.02831	2.55
[R].KLFIGGLSFETTDESLR.[S]	1xBiotin [K1]	4	1	P09651-1	P09651-1 [15-31]	P09651-1 1xBiotin [K15]	Heterogeneous nuclear ribonucleoprotein A1 [OS=Homo sapiens]	1	2139.08																						Not Found	Not Found	Not Found	High	Not Found	Not Found	High	0.0009289	0.004144	2.56
[R].VSFELFADKVPK.[T]	1xBiotin [K9]	1	1	P62937	P62937 [20-31]	P62937 1xBiotin [K28]	peptidyl-prolyl cis-trans isomerase A [OS=Homo sapiens]	1	1605.83																						Not Found	Not Found	Not Found	High	Not Found	Not Found	High	0.003389	0.06123	2.08
[R].GGIVSQVKVPK.[K]	1xBiotin [K8]	2	1	P22314	P22314 [289-299]	P22314 1xBiotin [K296]	Ubiquitin-like modifier-activating enzyme 1 [OS=Homo sapiens]	1	1337.76																						Not Found	Not Found	Not Found	High	Not Found	Not Found	High	0.001693	0.01994	2.41
[R].GLGDCLVKIYK.[S]	1xBiotin [K8]; 1xCarbamidomethyl [C5]	1	1	P05141	P05141 [156-166]	P05141 1xBiotin [K163]	ADP/ATP translocase 2 [OS=Homo sapiens]	1	1491.77																						Not Found	Not Found	Not Found	High	Not Found	Not Found	High	0.0009289	0.007053	2.92
[K].GILAADESTGSIAKR.[L]	1xBiotin [K14]	2	1	P04075	P04075 [29-43]	P04075 1xBiotin [K42]	fructose-bisphosphate aldolase A [OS=Homo sapiens]	1	1714.88																						Not Found	Not Found	Not Found	High	Not Found	Not Found	High	0.0008826	0.0005247	3.51
[R].GILLYGPPGTGKTLIAR.[A]	1xBiotin [K12]	1	1	P55072	P55072 [240-256]	P55072 1xBiotin [K251]	Transitional endoplasmic reticulum ATPase [OS=Homo sapiens]	1	1953.1																						Not Found	Not Found	Not Found	High	Not Found	Not Found	High	0.002374	0.03939	1.54
[R].GPSGLLVYQGKGK.[F]	1xBiotin [K11]	3	1	P00387	P00387 [144-156]	P00387 1xBiotin [K154]	NADH-cytochrome b5 reductase 3 [OS=Homo sapiens]	1	1529.81																						Not Found	Not Found	Not Found	High	Not Found	Not Found	High	0.0008826	0.0006027	3.42
[R].KLDPGSEETQTLVR.[E]	1xBiotin [K1]	2	1	P26641	P26641 [401-414]	P26641 1xBiotin [K401]	elongation factor 1-gamma [OS=Homo sapiens]	1	1798.9																						Not Found	Not Found	Not Found	High	Not Found	Not Found	High	0.0009289	0.003194	2.61
[R].GQPIYIQFSNHKELK.[T]	1xBiotin [K15]	3	1	P26599	P26599 [123-137]	P26599 1xBiotin [K137]	Polypyrimidine tract-binding protein 1 [OS=Homo sapiens]	1	2028.04																						Not Found	Not Found	Not Found	High	Not Found	Not Found	High	0.0009289	0.003789	2.92
[R].FSNISAAKAVADAIR.[T]	1xBiotin [K8]	2	1	P50991	P50991 [35-49]	P50991 1xBiotin [K42]	T-complex protein 1 subunit delta [OS=Homo sapiens]	1	1759.92																						Not Found	Not Found	Not Found	High	Not Found	Not Found	High	0.0008826	0.0004243	2.62
[K].VNGKAGNLGGGVVTIER.[S]	1xBiotin [K4]	1	1	P35268	P35268 [49-65]	P35268 1xBiotin [K52]	60S ribosomal protein L22 [OS=Homo sapiens]	1	1866.99																						Not Found	Not Found	Not Found	High	Not Found	Not Found	High	0.0008826	0.0005593	2.65
[R].VMKFSVSPVVR.[V]	1xBiotin [K3]; 1xOxidation [M2]	1	1	P13639	P13639 [496-506]	P13639 1xBiotin [K498]	Elongation factor 2 [OS=Homo sapiens]	1	1490.79																						Not Found	Not Found	Not Found	High	Not Found	Not Found	High	0.001298	0.01674	2.32
[K].GTISAPGKVVTAAAQAK.[Q]	1xBiotin [K8]	8	1	Q13428-1	Q13428-1 [804-820]	Q13428-1 1xBiotin [K811]	Treacle protein [OS=Homo sapiens]	1	1795.97																						Not Found	Not Found	Not Found	High	Not Found	Not Found	High	0.003389	0.05688	1.89
[R].GVQKILQDYK.[S]	1xBiotin [K4]	1	1	P06576	P06576 [423-432]	P06576 1xBiotin [K426]	ATP synthase subunit beta, mitochondrial [OS=Homo sapiens]	1	1417.75																						Not Found	Not Found	Not Found	High	Not Found	Not Found	High	0.0008826	0.0006967	2.73
[R].GVQKLVLTSR.[S]	1xBiotin [K4]	1	1	P49327	P49327 [1908-1917]	P49327 1xBiotin [K1911]	Fatty acid synthase [OS=Homo sapiens]	1	1326.76																						Not Found	Not Found	Not Found	High	Not Found	Not Found	High	0.0009289	0.01426	2.01
[R].GYFEYIEENKYSR.[A]	1xBiotin [K10]	2	1	Q00839	Q00839 [256-268]	Q00839 1xBiotin [K265]	Heterogeneous nuclear ribonucleoprotein U [OS=Homo sapiens]	1	1923.86																						Not Found	Not Found	Not Found	High	Not Found	Not Found	High	0.0008826	0.0007359	2.51
[R].KDAFADAVQR.[A]	1xBiotin [K1]	1	1	Q92945	Q92945 [71-80]	Q92945 1xBiotin [K71]	Far upstream element-binding protein 2 [OS=Homo sapiens]	1	1346.65																						Not Found	Not Found	Not Found	High	Not Found	Not Found	High	0.0008826	0.002031	2.26
[R].KEAESSPFVER.[L]	1xBiotin [K1]	1	1	P14625	P14625 [547-557]	P14625 1xBiotin [K547]	Endoplasmin [OS=Homo sapiens]	1	1504.71																						Not Found	Not Found	Not Found	High	Not Found	Not Found	High	0.0009289	0.008246	1.84
[K].KGIVDQSQQAYQEAFEISK.[K]	1xBiotin [K1]	2	1	P63104-1	P63104-1 [139-157]	P63104-1 1xBiotin [K139]	14-3-3 protein zeta/delta [OS=Homo sapiens]	1	2395.16																						Not Found	Not Found	Not Found	High	Not Found	Not Found	High	0.0009289	0.01283	3.28
[K].KGVNLPGAAVDLPAVSEK.[D]	1xBiotin [K1]	3	1	P14618	P14618 [207-224]	P14618 1xBiotin [K207]	Pyruvate kinase PKM [OS=Homo sapiens]	1	1991.06																						Not Found	Not Found	Not Found	High	Not Found	Not Found	High	0.0009289	0.004036	3.01
[R].VIFGLFGKTVPK.[T]	1xBiotin [K8]	1	1	P23284	P23284 [60-71]	P23284 1xBiotin [K67]	peptidyl-prolyl cis-trans isomerase B [OS=Homo sapiens]	1	1531.87																						Not Found	Not Found	Not Found	High	Not Found	Not Found	High	0.002374	0.04065	1.89
[K].KIENCNYAVELGK.[N]	1xBiotin [K1]; 1xCarbamidomethyl [C5]	1	1	Q14651	Q14651 [457-469]	Q14651 1xBiotin [K457]	Plastin-1 [OS=Homo sapiens]	1	1763.85																						Not Found	Not Found	Not Found	High	Not Found	Not Found	High	0.0009289	0.01396	2.38
[K].FMLGKQEVIR.[G]	1xBiotin [K5]; 1xOxidation [M2]	1	1	P62942	P62942 [49-58]	P62942 1xBiotin [K53]	Peptidyl-prolyl cis-trans isomerase FKBP1A [OS=Homo sapiens]	1	1462.75																						Not Found	Not Found	Not Found	High	Not Found	Not Found	High	0.002374	0.04231	1.87
[R].VVDALGNAIDGKGPIGSK.[T]	1xBiotin [K18]	2	1	P25705-1	P25705-1 [150-167]	P25705-1 1xBiotin [K167]	ATP synthase subunit alpha, mitochondrial [OS=Homo sapiens]	1	1937.02																						Not Found	Not Found	Not Found	High	Not Found	Not Found	High	0.002374	0.04121	1.79
[K].FGQGFGKTNIYTQK.[Q]	1xBiotin [K7]	3	2	Q9H5V9-1	Q9H5V9-1 [122-135]	Q9H5V9-1 1xBiotin [K128]	UPF0428 protein CXorf56 [OS=Homo sapiens]	1	1814.89																						Not Found	Not Found	High	High	Not Found	Not Found	High	0.0008826	0.002129	2.29
[R].AYILNLVKQIK.[K]	1xBiotin [K8]	2	1	P50991	P50991 [281-291]	P50991 1xBiotin [K288]	T-complex protein 1 subunit delta [OS=Homo sapiens]	1	1528.89																						Not Found	Not Found	Not Found	High	Not Found	Not Found	High	0.003389	0.062	2.41
[R].AVLKFAAATGATPIAGR.[F]	1xBiotin [K4]	1	1	P08865	P08865 [86-102]	P08865 1xBiotin [K89]	40S ribosomal protein SA [OS=Homo sapiens]	1	1841.01																						Not Found	Not Found	Not Found	High	Not Found	Not Found	High	0.0008826	0.0003405	3.25
[K].YGKIETIEVMEDR.[Q]	1xBiotin [K3]; 1xOxidation [M10]	2	2	P51991-1	P51991-1 [149-161]	P51991-1 1xBiotin [K151]	Heterogeneous nuclear ribonucleoprotein A3 [OS=Homo sapiens]	1	1824.85																						Not Found	High	Not Found	High	Not Found	Not Found	High	0.0008826	0.001492	2.59
[K].ATEKQHITLALEK.[Q]	1xBiotin [K4]	4	1	Q16891	Q16891 [424-436]	Q16891 1xBiotin [K427]	MICOS complex subunit Mic60 [OS=Homo sapiens]	1	1707.91																						Not Found	Not Found	Not Found	High	Not Found	Not Found	High	0.002658	0.045	2.64
[R].ASLSKLGDVYVNDAFGTAHR.[A]	1xBiotin [K5]	3	1	P00558	P00558 [152-171]	P00558 1xBiotin [K156]	phosphoglycerate kinase 1 [OS=Homo sapiens]	1	2347.15																						Not Found	Not Found	Not Found	High	Not Found	Not Found	High	0.0009289	0.008566	3.43
[R].APQCLGKFIEIAAR.[K]	1xBiotin [K7]; 1xCarbamidomethyl [C4]	2	1	Q00839	Q00839 [559-572]	Q00839 1xBiotin [K565]	Heterogeneous nuclear ribonucleoprotein U [OS=Homo sapiens]	1	1799.93																						Not Found	Not Found	Not Found	High	Not Found	Not Found	High	0.0008826	0.0009402	3.04
[R].DNGKHALIIYDDLSK.[Q]	1xBiotin [K4]	3	1	P25705-1	P25705-1 [302-316]	P25705-1 1xBiotin [K305]	ATP synthase subunit alpha, mitochondrial [OS=Homo sapiens]	1	1927.96																						Not Found	Not Found	Not Found	High	Not Found	Not Found	High	0.002374	0.03832	2.87
[K].APDGYIVKSQHSGNAQVTQTK.[F]	1xBiotin [K8]	3	1	Q92499	Q92499 [261-281]	Q92499 1xBiotin [K268]	ATP-dependent RNA helicase DDX1 [OS=Homo sapiens]	1	2455.2																						Not Found	Not Found	Not Found	High	Not Found	Not Found	High	0.003389	0.0557	2.26
[K].AMEAVAAQGKAK.[K-]	1xBiotin [K12]	2	1	P18669	P18669 [242-253]	P18669 1xBiotin [K253]	Phosphoglycerate mutase 1 [OS=Homo sapiens]	1	1400.7																						Not Found	Not Found	Not Found	High	Not Found	Not Found	High	0.00223	0.02342	2.24
[R].YLKSEPIPESNDGPVK.[V]	1xBiotin [K3]	1	1	P30101	P30101 [364-379]	P30101 1xBiotin [K366]	Protein disulfide-isomerase A3 [OS=Homo sapiens]	1	1998.98																						Not Found	Not Found	Not Found	High	Not Found	Not Found	High	0.0009289	0.00795	2.24
[K].ALELTGLKVFGNEIK.[L]	1xBiotin [K8]	1	1	P19338	P19338 [363-377]	P19338 1xBiotin [K370]	Nucleolin [OS=Homo sapiens]	1	1858.01																						Not Found	Not Found	Not Found	High	Not Found	Not Found	High	0.001693	0.01887	2.18
[K].AFSQFGKLER.[V]	1xBiotin [K7]	5	1	O60506	O60506 [357-366]	O60506 1xBiotin [K363]	Heterogeneous nuclear ribonucleoprotein Q [OS=Homo sapiens]	1	1408.7																						Not Found	Not Found	Not Found	High	Not Found	Not Found	High	0.0009289	0.005994	2.38
[K].AFSGYLGTDQSKWK.[A]	1xBiotin [K12]	1	1	P10768	P10768 [187-200]	P10768 1xBiotin [K198]	S-formylglutathione hydrolase [OS=Homo sapiens]	1	1813.86																						Not Found	Not Found	Not Found	High	Not Found	Not Found	High	0.0008826	0.0008765	2.83
[R].YTLHYKTDAPLNIR.[S]	1xBiotin [K6]	2	1	Q12931	Q12931 [327-340]	Q12931 1xBiotin [K332]	heat shock protein 75 kDa, mitochondrial [OS=Homo sapiens]	1	1930.98																						Not Found	Not Found	Not Found	High	Not Found	Not Found	High	0.0009289	0.006847	2.14
[K].YLEKYYNLK.[N]	1xBiotin [K4]	1	2	P03956	P03956 [37-45]	P03956 1xBiotin [K40]	Interstitial collagenase [OS=Homo sapiens]	1	1459.73																						Not Found	High	High	Not Found	Not Found	Not Found	High	0.0009289	0.002881	1.93
[K].FINYVKNCFR.[M]	1xBiotin [K6]; 1xCarbamidomethyl [C8]	2	1	P06748	P06748 [268-277]	P06748 1xBiotin [K273]	Nucleophosmin [OS=Homo sapiens]	1	1586.76																						Not Found	Not Found	Not Found	High	Not Found	Not Found	High	0.0008826	0.002178	2.89
[R].DNSTMGYMAAKK.[H]	1xBiotin [K11]; 1xOxidation [M5]	2	1	P07900	P07900 [621-632]	P07900 1xBiotin [K631]	Heat shock protein HSP 90-alpha [OS=Homo sapiens]	1	1558.67																						Not Found	Not Found	Not Found	High	Not Found	Not Found	High	0.00223	0.02148	1.79
[R].DVFTKGYGFGLIK.[L]	1xBiotin [K5]	1	1	P21796	P21796 [16-28]	P21796 1xBiotin [K20]	voltage-dependent anion-selective channel protein 1 [OS=Homo sapiens]	1	1670.86																						Not Found	Not Found	Not Found	High	Not Found	Not Found	High	0.0009289	0.01402	2.08
[K].KIFVGGIKEDTEEYNLR.[D]	1xBiotin [K1]	2	1	P51991-1	P51991-1 [127-143]	P51991-1 1xBiotin [K127]	Heterogeneous nuclear ribonucleoprotein A3 [OS=Homo sapiens]	2	2237.13																						Not Found	Not Found	Not Found	High	Not Found	Not Found	High	0.003389	0.06294	1.66
[K].FEKNFYVEHPEVAR.[L]	1xBiotin [K3]	4	1	Q92841-1	Q92841-1 [51-64]	Q92841-1 1xBiotin [K53]	Isoform 2 of Probable ATP-dependent RNA helicase DDX17 [OS=Homo sapiens]	1	1990.95																						Not Found	Not Found	Not Found	High	Not Found	Not Found	High	0.0009289	0.008935	1.84
[R].EIQVQHPAAKSMIEISR.[T]	1xBiotin [K10]	1	1	P49368-1	P49368-1 [69-85]	P49368-1 1xBiotin [K78]	T-complex protein 1 subunit gamma [OS=Homo sapiens]	1	2163.1																						Not Found	Not Found	Not Found	High	Not Found	Not Found	High	0.002374	0.03179	2.92
[R].EKLQEEMLQR.[E]	1xBiotin [K2]	1	1	P08670	P08670 [187-196]	P08670 1xBiotin [K188]	Vimentin [OS=Homo sapiens]	1	1529.75																						Not Found	Not Found	Not Found	High	Not Found	Not Found	High	0.0008826	0.002118	1.85
[R].VVGKEQGQNLAR.[Q]	1xBiotin [K4]	6	1	P61224-1	P61224-1 [125-136]	P61224-1 1xBiotin [K128]	Ras-related protein Rap-1b [OS=Homo sapiens]	1	1524.8																						Not Found	Not Found	Not Found	High	Not Found	Not Found	High	0.0009289	0.006063	1.95
[K].EGNLAIQQAGKNMSAR.[L]	1xBiotin [K11]	1	1	Q9UKZ9	Q9UKZ9 [344-359]	Q9UKZ9 1xBiotin [K354]	Procollagen C-endopeptidase enhancer 2 [OS=Homo sapiens]	1	1913.93																						Not Found	Not Found	Not Found	High	Not Found	Not Found	High	0.0008826	0.002582	2.82
[K].YAVLYQPLFDKR.[F]	1xBiotin [K11]	2	1	P55209	P55209 [106-117]	P55209 1xBiotin [K116]	Nucleosome assembly protein 1-like 1 [OS=Homo sapiens]	1	1738.9																						Not Found	Not Found	Not Found	High	Not Found	Not Found	High	0.0009289	0.004978	1.86
[K].VVLAYEPVWAIGTGKTATPQQAQEVHEK.[L]	1xBiotin [K15]	3	1	P60174-1	P60174-1 [161-188]	P60174-1 1xBiotin [K175]	Isoform 2 of Triosephosphate isomerase [OS=Homo sapiens]	1	3276.67																						Not Found	Not Found	Not Found	Not Found	High	Not Found	High	0.002979	0.0475	3.04
[K].VVLIGDSGVGKSNLLSR.[F]	1xBiotin [K11]	4	1	P62491-1	P62491-1 [14-30]	P62491-1 1xBiotin [K24]	Ras-related protein Rab-11A [OS=Homo sapiens]	1	1940.06																						Not Found	Not Found	Not Found	High	Not Found	Not Found	High	0.0009289	0.007581	2.16
[K].VWNLANCKLK.[T]	1xBiotin [K10]; 1xCarbamidomethyl [C7]	1	1	P63244	P63244 [176-185]	P63244 1xBiotin [K185]	Receptor of activated protein C kinase 1 [OS=Homo sapiens]	1	1471.75																						Not Found	Not Found	Not Found	High	Not Found	Not Found	High	0.002374	0.04265	1.86
[R].EGKTDYYAR.[K]	1xBiotin [K3]	1	1	P46777	P46777 [25-33]	P46777 1xBiotin [K27]	60S ribosomal protein L5 [OS=Homo sapiens]	1	1328.59																						Not Found	Not Found	Not Found	High	Not Found	Not Found	High	0.0009289	0.009609	2.05
[K].EFGTNIKLGVIEDHSNR.[T]	1xBiotin [K7]	2	1	P14625	P14625 [487-503]	P14625 1xBiotin [K493]	Endoplasmin [OS=Homo sapiens]	1	2155.06																						Not Found	Not Found	Not Found	High	Not Found	Not Found	High	0.0009289	0.0132	2.44
[K].EALNSCNKR.[E]	1xBiotin [K8]; 1xCarbamidomethyl [C6]	1	1	P19338	P19338 [538-546]	P19338 1xBiotin [K545]	Nucleolin [OS=Homo sapiens]	1	1317.6																						Not Found	Not Found	Not Found	High	Not Found	Not Found	High	0.0009289	0.0124	2.3
[K].DYSSGFGGKYGVQADR.[V]	1xBiotin [K9]	3	3	Q14247-1	Q14247-1 [153-168]	Q14247-1 1xBiotin [K161]	Src substrate cortactin [OS=Homo sapiens]	1	1932.85																						High	Not Found	High	High	Not Found	Not Found	High	0.0008826	3.68e-05	3.07
[R].VVIIGAGKPAAVVLQTK.[G]	1xBiotin [K8]	2	1	Q14697-1	Q14697-1 [892-908]	Q14697-1 1xBiotin [K899]	Neutral alpha-glucosidase AB [OS=Homo sapiens]	0	1890.12																						Not Found	Not Found	Not Found	High	Not Found	Not Found	High	0.00223	0.0215	2.33
[K].KIIEDQQESLNK.[W]	1xBiotin [K1]	1	1	P05455	P05455 [317-328]	P05455 1xBiotin [K317]	Lupus La protein [OS=Homo sapiens]	1	1670.84																						Not Found	Not Found	Not Found	High	Not Found	Not Found	High	0.002374	0.03234	2.3
[K].KNSVVEASEAAYK.[E]	1xBiotin [K1]	1	1	Q04917	Q04917 [143-155]	Q04917 1xBiotin [K143]	14-3-3 protein eta [OS=Homo sapiens]	1	1621.79																						Not Found	Not Found	Not Found	High	Not Found	Not Found	High	0.00223	0.02214	2.3
[R].VKSINNPDMR.[V]	1xBiotin [K2]; 1xOxidation [M9]	3	1	P53396-1	P53396-1 [977-986]	P53396-1 1xBiotin [K978]	ATP-citrate synthase [OS=Homo sapiens]	1	1415.68																						Not Found	Not Found	Not Found	High	Not Found	Not Found	High	0.003241	0.0488	1.69
[K].LTLSALVDGKSINAGGHK.[V]	1xBiotin [K10]	3	1	P45880	P45880 [268-285]	P45880 1xBiotin [K277]	Voltage-dependent anion-selective channel protein 2 [OS=Homo sapiens]	1	2007.07																						Not Found	Not Found	Not Found	High	Not Found	Not Found	High	0.002658	0.04572	3.05
[K].ITPVTVKAQTK.[A]	1xBiotin [K7]	3	1	Q14978-1	Q14978-1 [187-197]	Q14978-1 1xBiotin [K193]	nucleolar and coiled-body phosphoprotein 1 [OS=Homo sapiens]	1	1411.8																						Not Found	Not Found	Not Found	High	Not Found	Not Found	High	0.00223	0.02453	1.77
[R].LVKDVFISAAER.[D]	1xBiotin [K3]	1	1	P20618	P20618 [202-213]	P20618 1xBiotin [K204]	proteasome subunit beta type-1 [OS=Homo sapiens]	1	1573.84																						Not Found	Not Found	Not Found	High	Not Found	Not Found	High	0.0009289	0.007819	1.45
[K].TLVLLMGKEGVHGGLINK.[K]	1xBiotin [K8]; 1xOxidation [M6]	1	1	P07737	P07737 [109-126]	P07737 1xBiotin [K116]	profilin-1 [OS=Homo sapiens]	1	2121.16																						Not Found	Not Found	Not Found	Not Found	High	Not Found	High	0.002374	0.04354	2.94
[K].IVNLGSSKTDLFYER.[K]	1xBiotin [K8]	1	1	Q7RTV0	Q7RTV0 [88-102]	Q7RTV0 1xBiotin [K95]	PHD finger-like domain-containing protein 5A [OS=Homo sapiens]	1	1967.99																						Not Found	Not Found	Not Found	High	Not Found	Not Found	High	0.0008826	2.357e-06	4.01
[K].IVSGKDYNVTANSK.[L]	1xBiotin [K5]	4	1	P00338-1	P00338-1 [77-90]	P00338-1 1xBiotin [K81]	L-lactate dehydrogenase A chain [OS=Homo sapiens]	1	1721.85																						Not Found	Not Found	Not Found	Not Found	High	Not Found	High	0.002077	0.02034	1.45
[K].TLNPKAEVAR.[A]	1xBiotin [K5]	2	1	P40227-1	P40227-1 [6-15]	P40227-1 1xBiotin [K10]	T-complex protein 1 subunit zeta [OS=Homo sapiens]	1	1324.7																						Not Found	Not Found	Not Found	High	Not Found	Not Found	High	0.0009289	0.007836	1.75
[R].MEESFSSKYVPK.[Y]	1xBiotin [K8]; 1xOxidation [M1]	2	4	P42167	P42167 [382-393]	P42167 1xBiotin [K389]	Lamina-associated polypeptide 2, isoforms beta/gamma [OS=Homo sapiens]	1	1673.75																						High	High	Not Found	High	Not Found	High	High	0.0008826	0.0002564	1.83
[-].MSLKLQASNVTNK.[N]	1xBiotin [K4]; 1xMet-loss+Acetyl [N-Term]	2	1	Q9UKM9-1	Q9UKM9-1 [1-13]	Q9UKM9-1 1xBiotin [K4]; 1xMet-loss+Acetyl [N-Term]	RNA-binding protein Raly [OS=Homo sapiens]	1	1570.83																						Not Found	Not Found	Not Found	High	Not Found	Not Found	High	0.0008826	0.00231	2.07
[-].MSLSNKLTLDK.[L]	1xBiotin [K6]; 1xMet-loss+Acetyl [N-Term]	1	1	P00558	P00558 [1-11]	P00558 1xBiotin [K6]; 1xMet-loss+Acetyl [N-Term]	phosphoglycerate kinase 1 [OS=Homo sapiens]	1	1386.73																						Not Found	Not Found	Not Found	High	Not Found	Not Found	High	0.0009289	0.003948	2.71
[-].MTHFNKGPSYGLSAEVK.[N]	1xBiotin [K6]; 1xMet-loss+Acetyl [N-Term]	2	1	Q15417	Q15417 [1-17]	Q15417 1xBiotin [K6]; 1xMet-loss+Acetyl [N-Term]	Calponin-3 [OS=Homo sapiens]	1	2002.97																						Not Found	Not Found	Not Found	High	Not Found	Not Found	High	0.0009289	0.004004	3.33
[K].NALESYAFNMKSAVEDEGLK.[G]	1xBiotin [K11]; 1xOxidation [M10]	2	2	P0DMV8	P0DMV8 [540-559]	P0DMV8 1xBiotin [K550]	heat shock 70 kDa protein 1A [OS=Homo sapiens]	1	2458.13																						Not Found	Not Found	Not Found	High	High	Not Found	High	0.0009289	0.01412	2.48
[K].NLCYANTINWKK.[L]	1xBiotin [K11]; 1xCarbamidomethyl [C3]	3	1	P00533-1	P00533-1 [468-479]	P00533-1 1xBiotin [K478]	epidermal growth factor receptor [OS=Homo sapiens]	1	1750.84																						Not Found	Not Found	Not Found	High	Not Found	Not Found	High	0.002374	0.03523	2.69
[R].NLLSVAYKNVIGAR.[R]	1xBiotin [K8]	2	1	P62258-1	P62258-1 [43-56]	P62258-1 1xBiotin [K50]	14-3-3 protein epsilon [OS=Homo sapiens]	1	1743.96																						Not Found	Not Found	Not Found	High	Not Found	Not Found	High	0.0009289	0.003406	1.94
[R].NLVVIPKSVTPER.[I]	1xBiotin [K7]	1	1	P15121	P15121 [257-269]	P15121 1xBiotin [K263]	aldose reductase [OS=Homo sapiens]	1	1677.94																						Not Found	Not Found	Not Found	High	Not Found	Not Found	High	0.001298	0.01863	1.94
[R].QAKQESTEYR.[R]	1xBiotin [K3]	1	1	P08670	P08670 [311-320]	P08670 1xBiotin [K313]	Vimentin [OS=Homo sapiens]	1	1465.67																						Not Found	Not Found	Not Found	High	Not Found	Not Found	High	0.0009289	0.005183	1.9
[R].QFKSGSPVATFK.[Q]	1xBiotin [K3]	1	1	Q9BQ67	Q9BQ67 [339-350]	Q9BQ67 1xBiotin [K341]	Glutamate-rich WD repeat-containing protein 1 [OS=Homo sapiens]	1	1522.77																						Not Found	Not Found	Not Found	High	Not Found	Not Found	High	0.003389	0.06044	2.14
[K].SVSDYDGKLSNFK.[T]	1xBiotin [K8]	1	1	P07237	P07237 [264-276]	P07237 1xBiotin [K271]	Protein disulfide-isomerase [OS=Homo sapiens]	1	1685.78																						Not Found	Not Found	Not Found	High	Not Found	Not Found	High	0.0009289	0.008585	2.24
[K].SVLADQGKSFATASHR.[N]	1xBiotin [K8]	3	1	Q9NYF8-1	Q9NYF8-1 [414-429]	Q9NYF8-1 1xBiotin [K421]	Bcl-2-associated transcription factor 1 [OS=Homo sapiens]	1	1900.93																						Not Found	Not Found	Not Found	High	Not Found	Not Found	High	0.003241	0.04994	2.25
[R].STMKPVQK.[V]	1xBiotin [K4]	1	1	P11021	P11021 [337-344]	P11021 1xBiotin [K340]	78 kDa glucose-regulated protein [OS=Homo sapiens]	0	1144.59																						Not Found	Not Found	Not Found	High	Not Found	Not Found	High	0.00223	0.02383	1.41
[K].SQNATPKGPNAAYDFSQAATTGELAANK.[S]	1xBiotin [K7]	2	1	Q9Y5V3	Q9Y5V3 [114-141]	Q9Y5V3 1xBiotin [K120]	Melanoma-associated antigen D1 [OS=Homo sapiens]	1	3049.43																						Not Found	Not Found	Not Found	High	Not Found	Not Found	High	0.003389	0.05916	2.2
[K].SPYQEFTDHLVKTHTR.[V]	1xBiotin [K12]	1	1	P15880	P15880 [264-279]	P15880 1xBiotin [K275]	40S ribosomal protein S2 [OS=Homo sapiens]	1	2185.05																						Not Found	Not Found	Not Found	High	Not Found	Not Found	High	0.0008826	0.002606	2.95
[R].SNLPAKAIGHR.[I]	1xBiotin [K6]	1	1	P18077	P18077 [90-100]	P18077 1xBiotin [K95]	60S ribosomal protein L35a [OS=Homo sapiens]	1	1389.74																						Not Found	Not Found	Not Found	High	Not Found	Not Found	High	0.002658	0.04532	2.03
[K].ITDFGLAKLLGAEEK.[E]	1xBiotin [K8]	1	1	P00533-1	P00533-1 [853-867]	P00533-1 1xBiotin [K860]	epidermal growth factor receptor [OS=Homo sapiens]	1	1830.97																						Not Found	Not Found	Not Found	High	Not Found	Not Found	High	0.00223	0.02235	2.64
[R].TGLIKGSGTAEVELK.[K]	1xBiotin [K5]	3	1	P14618	P14618 [121-135]	P14618 1xBiotin [K125]	Pyruvate kinase PKM [OS=Homo sapiens]	1	1728.92																						Not Found	Not Found	Not Found	High	Not Found	Not Found	High	0.00223	0.02227	2.09
[R].SISLYYTGEKGQNQDYR.[G]	1xBiotin [K10]	1	1	P19338	P19338 [458-474]	P19338 1xBiotin [K467]	Nucleolin [OS=Homo sapiens]	1	2248.03																						Not Found	Not Found	Not Found	High	Not Found	Not Found	High	0.0008826	0.0005129	2.41
[R].SILKIDDVVNTR.[-]	1xBiotin [K4]	2	1	P50991	P50991 [528-539]	P50991 1xBiotin [K531]	T-complex protein 1 subunit delta [OS=Homo sapiens]	1	1598.86																						Not Found	Not Found	Not Found	High	Not Found	Not Found	High	0.0009289	0.006543	1.61
[K].SLFSNVVTKNK.[D]	1xBiotin [K11]	2	1	P31939	P31939 [398-408]	P31939 1xBiotin [K408]	bifunctional purine biosynthesis protein purH [OS=Homo sapiens]	1	1462.77																						Not Found	Not Found	Not Found	High	Not Found	Not Found	High	0.0009289	0.01013	2.57
[K].TKEQILEEFSK.[V]	1xBiotin [K2]	5	1	O60506	O60506 [255-265]	O60506 1xBiotin [K256]	Heterogeneous nuclear ribonucleoprotein Q [OS=Homo sapiens]	1	1577.79																						Not Found	Not Found	Not Found	High	Not Found	Not Found	High	0.0008826	0.0004711	2.54
[K].SAPELKTGISDVFAK.[N]	1xBiotin [K6]	1	1	P19338	P19338 [319-333]	P19338 1xBiotin [K324]	Nucleolin [OS=Homo sapiens]	1	1788.92																						Not Found	Not Found	Not Found	High	Not Found	Not Found	High	0.0008826	0.001824	2.43
[R].QKIVQAEGEAEAAK.[M]	1xBiotin [K2]	1	1	Q99623	Q99623 [223-236]	Q99623 1xBiotin [K224]	Prohibitin-2 [OS=Homo sapiens]	1	1697.85																						Not Found	Not Found	Not Found	High	Not Found	Not Found	High	0.00223	0.02247	2.45
[K].SIYGEKFEDENFILK.[H]	1xBiotin [K6]	2	1	P62937	P62937 [77-91]	P62937 1xBiotin [K82]	peptidyl-prolyl cis-trans isomerase A [OS=Homo sapiens]	1	2057.99																						Not Found	Not Found	Not Found	High	Not Found	Not Found	High	0.0009289	0.009038	1.77
[R].TQNVLGEKGR.[R]	1xBiotin [K8]	2	1	P23396-1	P23396-1 [55-64]	P23396-1 1xBiotin [K62]	40S ribosomal protein S3 [OS=Homo sapiens]	1	1327.68																						Not Found	Not Found	Not Found	High	Not Found	Not Found	High	0.001298	0.01786	1.83
[K].TSIAIDTIINQKR.[F]	1xBiotin [K12]	3	1	P25705-1	P25705-1 [219-231]	P25705-1 1xBiotin [K230]	ATP synthase subunit alpha, mitochondrial [OS=Homo sapiens]	1	1698.92																						Not Found	Not Found	Not Found	High	Not Found	Not Found	High	0.002374	0.03977	2.74
[K].ISDSEGFKANLSLLR.[R]	1xBiotin [K8]	2	1	P23246-1	P23246-1 [272-286]	P23246-1 1xBiotin [K279]	splicing factor, proline- and glutamine-rich [OS=Homo sapiens]	1	1875.96																						Not Found	Not Found	Not Found	High	Not Found	Not Found	High	0.0008826	0.0003379	2.55
[R].LDHKFDLMYAK.[R]	1xBiotin [K4]	12	1	P68363	P68363 [391-401]	P68363 1xBiotin [K394]	Tubulin alpha-1B chain [OS=Homo sapiens]	1	1606.78																						Not Found	Not Found	Not Found	High	Not Found	Not Found	High	0.001693	0.01885	2.94
[R].LAGAPSEDPQFPKVQWPPR.[E]	1xBiotin [K13]	2	1	O00391	O00391 [488-506]	O00391 1xBiotin [K500]	Sulfhydryl oxidase 1 [OS=Homo sapiens]	1	2346.17																						Not Found	Not Found	High	Not Found	Not Found	Not Found	High	0.00223	0.02822	2.1
[K].LAELKNLGQPIK.[I]	1xBiotin [K5]	1	1	P34932	P34932 [675-686]	P34932 1xBiotin [K679]	Heat shock 70 kDa protein 4 [OS=Homo sapiens]	1	1549.88																						Not Found	Not Found	Not Found	High	Not Found	Not Found	High	0.00223	0.023	2.29
[R].LAADVGKSGTER.[E]	1xBiotin [K7]	1	1	P12236	P12236 [141-152]	P12236 1xBiotin [K147]	ADP/ATP translocase 3 [OS=Homo sapiens]	1	1429.71																						Not Found	Not Found	Not Found	High	Not Found	Not Found	High	0.0009289	0.009997	2.85
[R].VGKIITVEK.[H]	1xBiotin [K3]	1	2	P54577	P54577 [372-380]	P54577 1xBiotin [K374]	Tyrosine--tRNA ligase, cytoplasmic [OS=Homo sapiens]	1	1212.7																						Not Found	Not Found	Not Found	High	Not Found	Not Found	High	0.0008826	0.002173	2.44
[K].KYEEIDNAPEER.[A]	1xBiotin [K1]	1	1	P49411	P49411 [91-102]	P49411 1xBiotin [K91]	elongation factor Tu, mitochondrial [OS=Homo sapiens]	1	1718.77																						Not Found	Not Found	Not Found	High	Not Found	Not Found	High	0.0009289	0.007057	1.8
[K].LDSPAGTALSPSGHTKLLPR.[S]	1xBiotin [K16]	2	1	P32322	P32322 [292-311]	P32322 1xBiotin [K307]	Pyrroline-5-carboxylate reductase 1, mitochondrial [OS=Homo sapiens]	1	2244.18																						Not Found	Not Found	Not Found	High	Not Found	Not Found	High	0.00223	0.02952	2.43
[K].KYDAFLASESLIK.[Q]	1xBiotin [K1]	1	1	P62906	P62906 [106-118]	P62906 1xBiotin [K106]	60S ribosomal protein L10A [OS=Homo sapiens]	1	1710.88																						Not Found	Not Found	Not Found	High	Not Found	Not Found	High	0.0008826	0.0008096	2.99
[K].KVEAQLQELQVK.[F]	1xBiotin [K1]	1	1	P35579-1	P35579-1 [1249-1260]	P35579-1 1xBiotin [K1249]	Myosin-9 [OS=Homo sapiens]	1	1638.89																						Not Found	Not Found	Not Found	High	Not Found	Not Found	High	0.0008826	8.641e-06	3.11
[R].KSDGIYIINLK.[R]	1xBiotin [K1]	1	1	P08865	P08865 [42-52]	P08865 1xBiotin [K42]	40S ribosomal protein SA [OS=Homo sapiens]	1	1489.81																						Not Found	Not Found	Not Found	High	Not Found	Not Found	High	0.0008826	2.993e-05	3.51
[R].KQSLGELIGTLNAAK.[V]	1xBiotin [K1]	2	1	P60174-1	P60174-1 [19-33]	P60174-1 1xBiotin [K19]	Isoform 2 of Triosephosphate isomerase [OS=Homo sapiens]	1	1768.96																						Not Found	Not Found	Not Found	High	Not Found	Not Found	High	0.0009289	0.003699	2.45
[K].KQGGLGPMNIPLVSDPK.[R]	1xBiotin [K1]; 1xOxidation [M8]	1	2	Q06830	Q06830 [93-109]	Q06830 1xBiotin [K93]	peroxiredoxin-1 [OS=Homo sapiens]	1	1993.02																						Not Found	Not Found	Not Found	High	Not Found	Not Found	High	0.0009289	0.01442	2.42
[K].TDKTLVLLMGK.[E]	1xBiotin [K3]	1	1	P07737	P07737 [106-116]	P07737 1xBiotin [K108]	profilin-1 [OS=Homo sapiens]	1	1444.79																						Not Found	Not Found	Not Found	High	Not Found	Not Found	High	0.0008826	0.0001644	3.18
[K].KNFEWVAER.[V]	1xBiotin [K1]	2	1	P22234	P22234 [247-255]	P22234 1xBiotin [K247]	multifunctional protein ADE2 [OS=Homo sapiens]	1	1404.67																						Not Found	Not Found	Not Found	High	Not Found	Not Found	High	0.0008826	0.001625	1.76
[R].KVESLQEEIAFLK.[K]	1xBiotin [K1]	1	1	P08670	P08670 [223-235]	P08670 1xBiotin [K223]	Vimentin [OS=Homo sapiens]	1	1759.93																						Not Found	Not Found	Not Found	High	Not Found	Not Found	High	0.0008826	1.911e-05	3.02
[K].KLVESLPQEIK.[A]	1xBiotin [K1]	1	1	P52815	P52815 [163-173]	P52815 1xBiotin [K163]	39S ribosomal protein L12, mitochondrial [OS=Homo sapiens]	1	1509.83																						Not Found	Not Found	Not Found	High	Not Found	Not Found	High	0.002374	0.03852	1.99
[K].VETFSGVYKK.[L]	1xBiotin [K9]	1	1	P62081	P62081 [170-179]	P62081 1xBiotin [K178]	40S ribosomal protein S7 [OS=Homo sapiens]	1	1383.7																						Not Found	Not Found	Not Found	High	Not Found	Not Found	High	0.0009289	0.009239	2.18
[R].VDKSAVGFDYQGK.[T]	1xBiotin [K3]	3	1	Q14247-1	Q14247-1 [169-181]	Q14247-1 1xBiotin [K171]	Src substrate cortactin [OS=Homo sapiens]	1	1639.78																						Not Found	Not Found	High	Not Found	Not Found	Not Found	High	0.0009289	0.002988	1.71
[K].LQNKEHVIEALR.[R]	1xBiotin [K4]	1	1	P27635	P27635 [142-153]	P27635 1xBiotin [K145]	60S ribosomal protein L10 [OS=Homo sapiens]	1	1675.89																						Not Found	Not Found	Not Found	High	Not Found	Not Found	High	0.003389	0.06173	2.27
[K].LQLIKDYR.[E]	1xBiotin [K5]	1	1	P27348	P27348 [76-83]	P27348 1xBiotin [K80]	14-3-3 protein theta [OS=Homo sapiens]	1	1274.69																						Not Found	Not Found	Not Found	High	Not Found	Not Found	High	0.00223	0.0268	2.42
[R].LQEETGAKISVLGK.[G]	1xBiotin [K8]	2	1	Q07666	Q07666 [187-200]	Q07666 1xBiotin [K194]	KH domain-containing, RNA-binding, signal transduction-associated protein 1 [OS=Homo sapiens]	1	1698.91																						Not Found	Not Found	Not Found	High	Not Found	Not Found	High	0.002374	0.0346	2.2
[R].IPKEQGVLSFWR.[G]	1xBiotin [K3]	2	1	P12236; P05141	P12236 [61-72]; P05141 [61-72]	P12236 1xBiotin [K63]; P05141 1xBiotin [K63]	ADP/ATP translocase 3 [OS=Homo sapiens] ADP/ATP translocase 2 [OS=Homo sapiens]	1	1685.88																						Not Found	Not Found	Not Found	High	Not Found	Not Found	High	0.0008826	0.0006615	2.01
[R].INKALDR.[T]	1xBiotin [K3]	5	1	P35580	P35580 [440-446]	P35580 1xBiotin [K442]	Myosin-10 [OS=Homo sapiens]	1	1055.57																						Not Found	Not Found	Not Found	High	Not Found	Not Found	High	0.001693	0.02021	2.05
[R].TVGQLYKEQLAK.[L]	1xBiotin [K7]	2	1	P35579-1	P35579-1 [645-656]	P35579-1 1xBiotin [K651]	Myosin-9 [OS=Homo sapiens]	1	1603.85																						Not Found	Not Found	Not Found	High	Not Found	Not Found	High	0.003241	0.04892	1.89
[R].LGKVADWTGATYQDK.[R]	1xBiotin [K3]	3	1	O15371	O15371 [39-53]	O15371 1xBiotin [K41]	Eukaryotic translation initiation factor 3 subunit D [OS=Homo sapiens]	1	1878.91																						Not Found	Not Found	Not Found	High	Not Found	Not Found	High	0.0009289	0.01347	2.75
[R].LNELLVKALER.[H]	1xBiotin [K7]	2	1	Q12931	Q12931 [693-703]	Q12931 1xBiotin [K699]	heat shock protein 75 kDa, mitochondrial [OS=Homo sapiens]	1	1523.86																						Not Found	Not Found	Not Found	High	Not Found	Not Found	High	0.0008826	0.001791	2.67
[R].VAAAVDLIIKSHQGLDR.[Q]	1xBiotin [K10]	1	1	P49327	P49327 [2397-2413]	P49327 1xBiotin [K2406]	Fatty acid synthase [OS=Homo sapiens]	1	2032.1																						Not Found	Not Found	Not Found	High	Not Found	Not Found	High	0.0008826	0.002179	2.68
[R].ILEFFGLKK.[E]	1xBiotin [K8]	1	1	P07237	P07237 [301-309]	P07237 1xBiotin [K308]	Protein disulfide-isomerase [OS=Homo sapiens]	1	1320.74																						Not Found	Not Found	Not Found	High	Not Found	Not Found	High	0.0009289	0.004165	1.91
[K].LKLSILYPATTGR.[N]	1xBiotin [K2]	1	1	P30041	P30041 [143-155]	P30041 1xBiotin [K144]	Peroxiredoxin-6 [OS=Homo sapiens]	1	1658.93																						Not Found	Not Found	Not Found	High	Not Found	Not Found	High	0.003389	0.05837	2.03
[R].LHNQKTGQEVVFVAEPDNK.[N]	1xBiotin [K5]	2	1	P04844-1	P04844-1 [438-456]	P04844-1 1xBiotin [K442]	Dolichyl-diphosphooligosaccharide--protein glycosyltransferase subunit 2 [OS=Homo sapiens]	1	2379.18																						Not Found	Not Found	Not Found	High	Not Found	Not Found	High	0.0008826	6.258e-05	2.7
[R].VDKAAAAAAALQAK.[S]	1xBiotin [K3]	1	1	P36578	P36578 [351-364]	P36578 1xBiotin [K353]	60S ribosomal protein L4 [OS=Homo sapiens]	1	1524.82																						Not Found	Not Found	Not Found	High	Not Found	Not Found	High	0.0008826	7.916e-05	3.9
[R].LGQEATVGKATGFLK.[N]	1xBiotin [K9]	2	1	P53396-1	P53396-1 [89-103]	P53396-1 1xBiotin [K97]	ATP-citrate synthase [OS=Homo sapiens]	1	1745.93																						Not Found	Not Found	Not Found	High	Not Found	Not Found	High	0.003389	0.05807	2.6
[R].TWEKLLLAAR.[A]	1xBiotin [K4]	1	1	P08865	P08865 [54-63]	P08865 1xBiotin [K57]	40S ribosomal protein SA [OS=Homo sapiens]	1	1426.79																						Not Found	Not Found	Not Found	High	Not Found	Not Found	High	0.0008826	0.0008453	2.12
[R].SYSKLLCGLLAER.[L]	1xBiotin [K4]; 1xCarbamidomethyl [C7]	1	1	P14174	P14174 [75-87]	P14174 1xBiotin [K78]	Macrophage Migration inhibitory factor [OS=Homo sapiens]	1	1735.89																						Not Found	Not Found	Not Found	High	Not Found	Not Found	High	0.0008826	0.001829	3

## Sheet: PeptideGroups_GO_Ratio
Annotated Sequence	Modifications	# Proteins	# PSMs	Master Protein Accessions	Positions in Master Proteins	Modifications in Master Proteins	Master Protein Descriptions	# Missed Cleavages	Theo. MH+ [Da]	Abundances (Normalized): F1: Sample, AGIA-FabID n=1	Abundances (Normalized): F11: Sample, AGIA-FabID n=2	Abundances (Normalized): F13: Sample, AGIA-FabID n=3	Abundances (Normalized): F2: Sample, EGFR-FabID n=1	Abundances (Normalized): F12: Sample, EGFR-FabID n=2	Abundances (Normalized): F14: Sample, EGFR-FabID n=3	TMHMM (TM helix)	TMHMM (in/out)	UniProt Location	Gene symbol	Ratio(EGFR-FabID/AGIA-FabID)	Ratio(Log2)	pValue	− p Value (LOG10)	p Value Rank	q value	q value (-log10)
[R].GKAVGPASILK.[E]	1xBiotin [K2]	2	2	O95218-1	O95218-1 [136-146]	O95218-1 1xBiotin [K137]	Zinc finger Ran-binding domain-containing protein 2 [OS=Homo sapiens]	1	1266.72	2679.14	2882.36	2840.55	22415.3	24400	24644.9	NoTM	outside	Nucleus	ZRANB2	8.5051	3.08833	7.69229e-06	5.11394	1	0.00491537	2.30844
[R].LNGDFAQLNLKIK.[F]	1xBiotin [K11]	2	2	P19022	P19022 [657-669]	P19022 1xBiotin [K667]	Cadherin-2 [OS=Homo sapiens]	1	1699.92	4827.27	3929.51	4071.06	14497.4	15892.1	15346.7	HasTM	outside	Cell membrane;Cell membrane, sarcolemma;Cell junction;Cell surface;Colocalizes with OBSCN at the intercalated disk and at sarcolemma in cardiomyocytes	CDH2	3.56538	1.83406	2.40117e-05	4.61958	2	0.00767174	2.11511
[K].AIHNKVNIVPVIAK.[A]	1xBiotin [K5]	3	2	Q15019	Q15019 [170-183]	Q15019 1xBiotin [K174]	septin-2 [OS=Homo sapiens]	1	1742.01	31518.7	29685	33699.6	4413.05	4008.38	5860.86	NoTM	outside	Cytoplasm;Cytoplasm, cytoskeleton;Cytoplasm, cytoskeleton, spindle;Chromosome, centromere, kinetochore;Cleavage furrow;Midbody;Cytoplasm, cell cortex;Cell projection, cilium membrane;Cell projection, cilium, flagellum;At the metaphase plate, in close apposition to the kinetochores of the congressed chromosomes;In cells undergoing cytokinesis, localized to the midbody, the ingressing cleavage furr…	SEPTIN2	0.150493	-2.73223	3.13167e-05	4.50422	3	0.00667046	2.17584
[K].LFGTSGQKTK.[I]	1xBiotin [K]	3	24	P00533-1	P00533-1 [480-489]	P00533-1 1xBiotin [K]	epidermal growth factor receptor [OS=Homo sapiens]	1	1292.67	63889.8	40874.9	41712.4	3.56869e+06	4.23564e+06	3.78568e+06	HasTM	outside	Cell membrane;Endoplasmic reticulum membrane ;Single-pass type I membrane protein;Golgi apparatus membrane;Single-pass type I membrane protein;Nucleus membrane;Single-pass type I membrane protein;Endosome;Endosome membrane;Nucleus;Endocytosed upon activation by ligand (PubMed:2790960, PubMed:17182860, PubMed:27153536);Colocalized with GPER1 in the nucleus of estrogen agonist-induced cancer-associ…	EGFR	79.1251	6.30606	4.1559e-05	4.38133	4	0.00663905	2.17789
[K].AGIKTK.[N]	1xBiotin [K4]	1	3	Q7Z417	Q7Z417 [147-152]	Q7Z417 1xBiotin [K150]	Nuclear fragile X mental retardation-interacting protein 2 [OS=Homo sapiens]	1	843.476	66524.8	75569.2	76565.5	14484.3	15581.1	12924.6	NoTM	outside	Nucleus;Cytoplasm;Cytoplasm, Stress granule	NUFIP2	0.196607	-2.34661	5.82386e-05	4.23479	5	0.0074429	2.12826
[R].SKYKPTPIPIK.[V]	1xBiotin [K2]	1	3	Q14126	Q14126 [366-376]	Q14126 1xBiotin [K367]	Desmoglein-2 [OS=Homo sapiens]	1	1497.85	3140.8	2655.04	3461.6	49516.7	57972.4	59408.1	HasTM	outside	Cell membrane;Single-pass type I membrane protein;Cell junction, desmosome	DSG2	18.0284	4.1722	7.05462e-05	4.15153	6	0.00751317	2.12418
[K].EAAGKSSGPTSLFAVTVAPPGAR.[Q]	1xBiotin [K5]	2	18	Q00839	Q00839 [182-204]	Q00839 1xBiotin [K186]	Heterogeneous nuclear ribonucleoprotein U [OS=Homo sapiens]	1	2397.22	161302	170927	153873	81383.4	81392.5	81764.4	NoTM	outside	Nucleus;Nucleus matrix;Chromosome;Nucleus speckle;Cytoplasm, cytoskeleton, microtubule organizing center, centrosome;Chromosome, centromere, kinetochore;Cytoplasm, cytoskeleton, spindle;Cytoplasm, cytoskeleton, spindle pole;Midbody;Cytoplasm;Cell surface;Cytoplasmic granule;Localizes in the nucleus during interphase (PubMed:21242313);At metaphase, localizes with mitotic spindle microtubules (MTs)…	HNRNPU	0.503065	-0.991184	8.27865e-05	4.08204	7	0.00755722	2.12164
[R].YMGKGVSK.[A]	1xBiotin [K4]; 1xOxidation [M2]	1	5	P06733-1	P06733-1 [57-64]	P06733-1 1xBiotin [K60]	alpha-enolase [OS=Homo sapiens]	1	1111.53	4683.03	3094.51	5553.71	26181	29797.7	25207.5	NoTM	outside	Cytoplasm;Cell membrane;Cytoplasm, myofibril, sarcomere, M line;ENO1 is localized to the M line;[Isoform MBP-1]: Nucleus;[Isoform MBP-1]: Nucleus	ENO1	6.08992	2.60642	0.000135279	3.86877	8	0.0108054	1.96636
[K].HFEAKIEK.[H]	1xBiotin [K5]	1	4	P30533	P30533 [283-290]	P30533 1xBiotin [K287]	alpha-2-macroglobulin receptor-associated protein [OS=Homo sapiens]	1	1227.62	46192.4	49019	53364.7	15970.6	11737.9	10989.6	HasTM	outside	Rough endoplasmic reticulum lumen;Endoplasmic reticulum-Golgi intermediate compartment lumen;Golgi apparatus, cis- Golgi network;Golgi apparatus lumen;Endosome lumen;Cell surface	LRPAP1	0.26046	-1.94086	0.000147195	3.83211	9	0.0104508	1.98085
[K].YQLKIK.[V]	1xBiotin [K4]	2	7	Q02487	Q02487 [319-324]	Q02487 1xBiotin [K322]	Desmocollin-2 [OS=Homo sapiens]	1	1018.58	24562.5	21853.2	24101.9	509879	622643	654004	HasTM	outside	Cell membrane;Cell junction, desmosome	DSC2	25.3345	4.66303	0.000197916	3.70352	10	0.0126468	1.89802
[R].GLKLTFDSSFSPNTGK.[K]	1xBiotin [K3]	1	1	P21796	P21796 [94-109]	P21796 1xBiotin [K96]	voltage-dependent anion-selective channel protein 1 [OS=Homo sapiens]	1	1924.95	2594.5	2977.19	2609.75	4677.15	4539.85	4454.75	NoTM	outside	Mitochondrion outer membrane;Cell membrane;Membrane raft	VDAC1	1.67107	0.740771	0.000202617	3.69332	11	0.0117702	1.92922
[R].YYKNIGLGFK.[T]	1xBiotin [K3]	1	5	P62280	P62280 [36-45]	P62280 1xBiotin [K38]	40S ribosomal protein S11 [OS=Homo sapiens]	1	1428.73	30131.1	27639.9	24536.9	6547.95	5680.08	5039.21	NoTM	outside	NO_DATA	RPS11	0.209788	-2.25299	0.000206073	3.68598	12	0.0109734	1.95966
[K].QPVGGGQKLLTR.[K]	1xBiotin [K8]	3	1	Q14978-1	Q14978-1 [408-419]	Q14978-1 1xBiotin [K415]	nucleolar and coiled-body phosphoprotein 1 [OS=Homo sapiens]	1	1479.81	2307.72	4146.57	4548.87	14105.4	16285.9	16217.4	NoTM	outside	Nucleus, nucleolus;Cytoplasm;At telophase it begins to assemble into granular-like pre-nucleolar bodies which are subsequently relocated to nucleoli at the early G1-phase	NOLC1	4.23594	2.08268	0.000281916	3.54988	13	0.0138572	1.85832
[K].KLFGTSGQK.[T]	1xBiotin [K1]	3	5	P00533-1	P00533-1 [479-487]	P00533-1 1xBiotin [K479]	epidermal growth factor receptor [OS=Homo sapiens]	1	1191.62	5310.34	5335.55	14292	326534	393435	296695	HasTM	outside	Cell membrane;Endoplasmic reticulum membrane ;Single-pass type I membrane protein;Golgi apparatus membrane;Single-pass type I membrane protein;Nucleus membrane;Single-pass type I membrane protein;Endosome;Endosome membrane;Nucleus;Endocytosed upon activation by ligand (PubMed:2790960, PubMed:17182860, PubMed:27153536);Colocalized with GPER1 in the nucleus of estrogen agonist-induced cancer-associ…	EGFR	40.7679	5.34936	0.000326934	3.48554	14	0.0149222	1.82617
[R].SGGYSSGKQGR.[S]	1xBiotin [K8]	5	8	Q15084-1	Q15084-1 [143-153]	Q15084-1 1xBiotin [K150]	Protein disulfide-isomerase A6 [OS=Homo sapiens]	1	1309.6	156124	137922	132235	54103.4	50742.2	61831.7	NoTM	outside	Endoplasmic reticulum lumen;Cell membrane;Melanosome	PDIA6	0.391003	-1.35475	0.000398011	3.4001	15	0.0169553	1.77069
[K].TPQHVKITDFGLAK.[L]	1xBiotin [K6]	1	2	P00533-1	P00533-1 [847-860]	P00533-1 1xBiotin [K852]	epidermal growth factor receptor [OS=Homo sapiens]	1	1780.94	4083.6	5852.04	4224.62	27430.2	26341	21473.5	HasTM	outside	Cell membrane;Endoplasmic reticulum membrane ;Single-pass type I membrane protein;Golgi apparatus membrane;Single-pass type I membrane protein;Nucleus membrane;Single-pass type I membrane protein;Endosome;Endosome membrane;Nucleus;Endocytosed upon activation by ligand (PubMed:2790960, PubMed:17182860, PubMed:27153536);Colocalized with GPER1 in the nucleus of estrogen agonist-induced cancer-associ…	EGFR	5.31379	2.40974	0.00044492	3.35172	16	0.017769	1.75034
[R].SNDPKSQNHPGWLMR.[G]	1xBiotin [K5]; 1xOxidation [M14]	2	2	P06213-1	P06213-1 [567-581]	P06213-1 1xBiotin [K571]	insulin receptor [OS=Homo sapiens]	1	2008.91	4363.38	3833.04	4823.72	38325.7	52019.6	45585	HasTM	outside	Cell membrane;Late endosome;Lysosome;In the presence of SORL1, internalized INSR molecules are redirected back to the cell surface, thereby preventing their lysosomal catabolism and strengthening insulin signal reception	INSR	10.44	3.38405	0.000495417	3.30503	17	0.0186219	1.72998
[R].IVAPGKGILAADESTGSIAK.[R]	1xBiotin [K6]	2	16	P04075	P04075 [23-42]	P04075 1xBiotin [K28]	fructose-bisphosphate aldolase A [OS=Homo sapiens]	1	2124.14	210020	166699	172702	48906	32184.6	32542.5	NoTM	outside	Cytoplasm, myofibril, sarcomere, I band;Cytoplasm, myofibril, sarcomere, M line	ALDOA	0.206823	-2.27353	0.000577757	3.23825	18	0.0205104	1.68803
[K].VVGAKVVTNAR.[S]	1xBiotin [K5]	5	4	Q15424-1	Q15424-1 [432-442]	Q15424-1 1xBiotin [K436]	Scaffold attachment factor B1 [OS=Homo sapiens]	1	1339.75	22156.5	20523	17886.2	7176.35	6267.11	7807.89	NoTM	outside	Nucleus	SAFB	0.350881	-1.51095	0.000581313	3.23559	19	0.0195505	1.70884
[K].ANVGAGKK.[KM-]	1xBiotin [K]	3	3	P62847-4	P62847-4 [123-130]	P62847-4 1xBiotin [K]	Isoform 4 of 40S ribosomal protein S24 [OS=Homo sapiens]	1	970.514	40771.5	50469.2	43107.8	12429.5	10445.6	5288.43	NoTM	outside	NO_DATA	RPS24	0.209631	-2.25408	0.000609778	3.21483	20	0.0194824	1.71036
[K].DSYVGDEAQSKR.[G]	1xBiotin [K11]	6	3	P60709	P60709 [51-62]	P60709 1xBiotin [K61]	Actin, cytoplasmic 1 [OS=Homo sapiens]	1	1580.7	5908.98	3394.59	5351.16	23843.3	19724.3	19149.8	NoTM	outside	Cytoplasm, cytoskeleton;Nucleus	ACTB	4.27967	2.0975	0.000649384	3.1875	21	0.0197598	1.70422
[R].AAPQQKR.[S]	1xBiotin [K6]	3	5	O14763	O14763 [67-73]	O14763 1xBiotin [K72]	Tumor necrosis factor receptor superfamily member 10B [OS=Homo sapiens]	1	1024.54	3255.93	3493.21	3021.58	37334.6	50233	39031.3	HasTM	inside	Membrane;Single-pass type I membrane protein	TNFRSF10B	12.957	3.69566	0.000653219	3.18494	22	0.018973	1.72186
[K].ANPFGGASHAKGIVLEK.[V]	1xBiotin [K11]	1	4	P62266	P62266 [38-54]	P62266 1xBiotin [K48]	40S ribosomal protein S23 [OS=Homo sapiens]	1	1922	121549	99028.6	110679	37413.8	25254.6	17296.9	NoTM	outside	Cytoplasm, cytosol;Cytoplasm;Rough endoplasmic reticulum;Detected in ribosomes that are associated with the rough endoplasmic reticulum (By similarity)	RPS23	0.2414	-2.0505	0.000664139	3.17774	23	0.0184515	1.73397
[R].SLKEISDGDVIISGNK.[N]	1xBiotin [K3]	3	7	P00533-1	P00533-1 [452-467]	P00533-1 1xBiotin [K454]	epidermal growth factor receptor [OS=Homo sapiens]	1	1900.97	10874.8	3644.73	3552.59	61590.5	66284.5	82530.2	HasTM	outside	Cell membrane;Endoplasmic reticulum membrane ;Single-pass type I membrane protein;Golgi apparatus membrane;Single-pass type I membrane protein;Nucleus membrane;Single-pass type I membrane protein;Endosome;Endosome membrane;Nucleus;Endocytosed upon activation by ligand (PubMed:2790960, PubMed:17182860, PubMed:27153536);Colocalized with GPER1 in the nucleus of estrogen agonist-induced cancer-associ…	EGFR	11.6425	3.54133	0.000702356	3.15344	24	0.0187002	1.72815
[K].DHIMEIFSTYGKIK.[M]	1xBiotin [K]	3	3	Q15287-1	Q15287-1 [175-188]	Q15287-1 1xBiotin [K]	RNA-binding protein with serine-rich domain 1 [OS=Homo sapiens]	1	1907.94	2424.2	2015.99	14312.9	56289.6	64691.8	52192.2	NoTM	outside	Nucleus;Nucleus speckle;Cytoplasm;Colocalizes with the core EJC, ALYREF/THOC4, NXF1 and UAP56 in the nucleus and nuclear speckles	RNPS1	9.2344	3.20702	0.000705148	3.15172	25	0.0180236	1.74416
[K].SSPLPAKGR.[D]	1xBiotin [K7]	1	1	Q7L2J0-1	Q7L2J0-1 [216-224]	Q7L2J0-1 1xBiotin [K222]	7SK snRNA methylphosphate capping enzyme [OS=Homo sapiens]	1	1138.6	185990	138138	152669	22496.5	25005.7	30447.4	NoTM	outside	NO_DATA	MEPCE	0.163486	-2.61276	0.000756218	3.12135	26	0.0185855	1.73083
[R].DNSTMGYMAAKK.[H]	1xBiotin [K11]; 2xOxidation [M5; M8]	2	3	P07900	P07900 [621-632]	P07900 1xBiotin [K631]	Heat shock protein HSP 90-alpha [OS=Homo sapiens]	1	1574.66	3363.89	4041.1	4820.37	10063.3	10430.3	8886.03	NoTM	outside	Nucleus;Cytoplasm;Melanosome;Cell membrane	HSP90AA1	2.40316	1.26494	0.000805545	3.09391	27	0.0190646	1.71977
[R].KDLYANTVLSGGTTMYPGIADR.[M]	1xBiotin [K1]; 1xOxidation [M15]	2	5	P60709	P60709 [291-312]	P60709 1xBiotin [K291]	Actin, cytoplasmic 1 [OS=Homo sapiens]	1	2585.24	5022.11	4999.75	4782.21	37174.4	34398.4	26872.7	NoTM	outside	Cytoplasm, cytoskeleton;Nucleus	ACTB	6.64989	2.73333	0.000823636	3.08426	28	0.0187966	1.72592
[R].MQKEITALAPSTMK.[I]	1xBiotin [K3]; 2xOxidation [M1; M13]	7	3	P60709	P60709 [313-326]	P60709 1xBiotin [K315]	Actin, cytoplasmic 1 [OS=Homo sapiens]	1	1806.88	4945	4470.04	2680.57	18863.3	18097.1	14456.3	NoTM	outside	Cytoplasm, cytoskeleton;Nucleus	ACTB	4.25085	2.08775	0.00100502	2.99783	29	0.0221451	1.65472
[R].DWVVAPISVPENGKGPFPQR.[L]	1xBiotin [K14]	2	6	P22223-1	P22223-1 [108-127]	P22223-1 1xBiotin [K121]	Cadherin-3 [OS=Homo sapiens]	1	2419.22	3225.34	5596.47	5448.27	26042.5	29177.1	20943.7	HasTM	outside	Cell membrane;Single-pass type I membrane protein	CDH3	5.33727	2.4161	0.00121023	2.91713	30	0.0257779	1.58875
[R].KESYSIYVYK.[V]	1xBiotin [K1]	7	2	Q16778	Q16778 [35-44]	Q16778 1xBiotin [K35]	Histone H2B type 2-E [OS=Homo sapiens]	1	1505.73	4934.58	2944.73	5214.09	21082.6	25868.4	18995.6	NoTM	outside	Nucleus;Chromosome	HIST2H2BE	5.03663	2.33246	0.00122155	2.91309	31	0.0251796	1.59895
[K].AQYKSLIGVEYKPVSATGAEDK.[D]	1xBiotin [K4]	1	2	P07814	P07814 [940-961]	P07814 1xBiotin [K943]	Bifunctional glutamate/proline--tRNA ligase [OS=Homo sapiens]	1	2580.3	2719.98	2120.46	2906.74	13108.1	12011.5	9461.63	NoTM	outside	Cytoplasm, cytosol;Membrane	EPRS	4.46371	2.15824	0.00126974	2.89629	32	0.0253551	1.59594
[R].RPDQQLQGEGKIIDR.[R]	1xBiotin [K11]	4	11	Q8NC51-1	Q8NC51-1 [112-126]	Q8NC51-1 1xBiotin [K122]	Plasminogen activator inhibitor 1 RNA-binding protein [OS=Homo sapiens]	1	1979.01	122770	114076	115523	58320.9	69441.7	77439.8	NoTM	outside	Cytoplasm;Nucleus;Cytoplasm, perinuclear region	SERBP1	0.582352	-0.780038	0.00134848	2.87015	33	0.0261115	1.58317
[R].YTKLSDPANWLK.[I]	1xBiotin [K3]	2	7	P19022	P19022 [534-545]	P19022 1xBiotin [K536]	Cadherin-2 [OS=Homo sapiens]	1	1661.84	2788.3	4256.83	2644.68	135021	89508.7	104205	HasTM	outside	Cell membrane;Cell membrane, sarcolemma;Cell junction;Cell surface;Colocalizes with OBSCN at the intercalated disk and at sarcolemma in cardiomyocytes	CDH2	33.9259	5.08431	0.00137245	2.8625	34	0.025794	1.58848
[K].YAKLEER.[T]	1xBiotin [K3]	2	2	O95218-1	O95218-1 [93-99]	O95218-1 1xBiotin [K95]	Zinc finger Ran-binding domain-containing protein 2 [OS=Homo sapiens]	1	1134.56	5412.43	3652.02	3167.99	13340.7	11491.2	10942	NoTM	outside	Nucleus	ZRANB2	2.92451	1.5482	0.00140163	2.85337	35	0.0255897	1.59193
[K].EDAMKTK.[T]	1xBiotin [K5]	3	3	Q29983	Q29983 [171-177]	Q29983 1xBiotin [K175]	MHC class I polypeptide-related sequence A [OS=Homo sapiens]	1	1048.48	5851.65	3162.03	5679.43	78794.6	66072.2	52021.5	HasTM	outside	Cell membrane;Cytoplasm;Infection with human adenovirus 5 suppresses cell surface expression due to the adenoviral E3-19K protein which causes retention in the endoplasmic reticulum	MICA	13.4	3.74417	0.00145363	2.83755	36	0.0258019	1.58835
[K].EAKPNGIFKGSTAENAEYLR.[V]	1xBiotin [K9]	1	3	P00533-1	P00533-1 [1180-1199]	P00533-1 1xBiotin [K1188]	epidermal growth factor receptor [OS=Homo sapiens]	1	2421.19	5484.5	2069.35	3170.45	30957.6	27201.5	39940.7	HasTM	outside	Cell membrane;Endoplasmic reticulum membrane ;Single-pass type I membrane protein;Golgi apparatus membrane;Single-pass type I membrane protein;Nucleus membrane;Single-pass type I membrane protein;Endosome;Endosome membrane;Nucleus;Endocytosed upon activation by ligand (PubMed:2790960, PubMed:17182860, PubMed:27153536);Colocalized with GPER1 in the nucleus of estrogen agonist-induced cancer-associ…	EGFR	9.14743	3.19337	0.00173671	2.76027	37	0.0299934	1.52297
[K].KTAEAGGVTGK.[G]	1xBiotin [K1]	1	1	P09874	P09874 [87-97]	P09874 1xBiotin [K87]	Poly [ADP-ribose] polymerase 1 [OS=Homo sapiens]	1	1244.63	5054.23	4366.97	4883.71	10440.5	8343.41	9856.84	NoTM	outside	Nucleus;Nucleus, nucleolus;Chromosome	PARP1	2.00216	1.00156	0.00191108	2.71872	38	0.0321363	1.493
[R].HQGVMVGMGQKDSYVGDEAQSK.[R]	1xBiotin [K11]; 2xOxidation [M5; M8]	6	4	P60709	P60709 [40-61]	P60709 1xBiotin [K50]	Actin, cytoplasmic 1 [OS=Homo sapiens]	1	2609.14	5737.98	12525.7	5871.16	77597	68850.2	51431.2	NoTM	outside	Cytoplasm, cytoskeleton;Nucleus	ACTB	8.19886	3.03542	0.00194148	2.71187	39	0.0318103	1.49743
[K].KLEDGPK.[F]	1xBiotin [K1]	3	4	P68104	P68104 [386-392]	P68104 1xBiotin [K386]	Elongation factor 1-alpha 1 [OS=Homo sapiens]	1	1012.51	24734	14064.6	18514.4	98883.7	80165.6	70310.4	NoTM	outside	Cytoplasm;Nucleus;Nucleus, nucleolus;Cell membrane;Translocates together with ZPR1 from the cytoplasm to the nucleus and nucleolus after treatment with mitogens (PubMed:8650580);Localization at the cell membrane depends on EEF1A1 phosphorylation status and the presence of PPP1R16B (PubMed:26497934)	EEF1A1	4.35084	2.12129	0.00200701	2.69745	40	0.0320619	1.49401
[K].LNGKVIDPK.[R]	1xBiotin [K4]	4	1	Q14103	Q14103 [162-170]	Q14103 1xBiotin [K165]	heterogeneous nuclear ribonucleoprotein D0 [OS=Homo sapiens]	1	1209.67	3317.28	4406.26	3333.33	10934.9	9678.33	8307.87	NoTM	outside	Nucleus;Cytoplasm;Component of ribonucleosomes;Cytoplasmic localization oscillates diurnally	HNRNPD	2.61566	1.38718	0.00208911	2.68004	41	0.0325595	1.48732
[K].AAATPAKK.[T]	1xBiotin [K7]	1	1	P19338	P19338 [89-96]	P19338 1xBiotin [K95]	Nucleolin [OS=Homo sapiens]	1	983.534	4614.96	2555.36	2495.24	11596	10717.4	9037.71	NoTM	outside	Nucleus, nucleolus;Cytoplasm	NCL	3.24359	1.69759	0.00212467	2.67271	42	0.0323254	1.49046
[K].TFGKAAGPSLSHTSGGTQSK.[V]	1xBiotin [K4]	1	3	P27694	P27694 [164-183]	P27694 1xBiotin [K167]	Replication protein A 70 kDa DNA-binding subunit [OS=Homo sapiens]	1	2145.04	41899.1	32382.7	43292	16373.3	15730.1	14649.6	NoTM	outside	Nucleus;Nucleus, PML body	RPA1	0.397648	-1.33044	0.00242494	2.6153	43	0.0360357	1.44327
[K].ALAAAGYDVEKNNSR.[I]	1xBiotin [K11]	5	2	P10412; P16403	P10412 [65-79]; P16403 [65-79]	P10412 1xBiotin [K75]; P16403 1xBiotin [K75]	Histone H1.4 [OS=Homo sapiens] Histone H1.2 [OS=Homo sapiens]	1	1804.86	4781.36	2639.18	2407.83	11236.8	9075.22	9574.41	NoTM	outside	Nucleus;Chromosome;Dysplays a punctuate staining pattern in the nucleus	HIST1H1E	3.04083	1.60447	0.00259176	2.5864	44	0.0376395	1.42436
[K].VIPELNGKLTGMAFR.[V]	1xBiotin [K8]; 1xOxidation [M12]	2	6	P04406-1	P04406-1 [220-234]	P04406-1 1xBiotin [K227]	glyceraldehyde-3-phosphate dehydrogenase [OS=Homo sapiens]	1	1887.98	81017.8	90054.5	73451.1	29399.6	44566.9	39257.5	NoTM	outside	Cytoplasm, cytosol;Nucleus;Cytoplasm, perinuclear region;Membrane;Cytoplasm, cytoskeleton;Postnuclear and Perinuclear regions	GAPDH	0.463039	-1.11079	0.00259407	2.58602	45	0.0368358	1.43373
[K].TKIISNR.[G]	1xBiotin [K2]	3	9	P00533-1	P00533-1 [488-494]	P00533-1 1xBiotin [K489]	epidermal growth factor receptor [OS=Homo sapiens]	1	1057.58	180772	139297	142668	310259	404782	390310	HasTM	outside	Cell membrane;Endoplasmic reticulum membrane ;Single-pass type I membrane protein;Golgi apparatus membrane;Single-pass type I membrane protein;Nucleus membrane;Single-pass type I membrane protein;Endosome;Endosome membrane;Nucleus;Endocytosed upon activation by ligand (PubMed:2790960, PubMed:17182860, PubMed:27153536);Colocalized with GPER1 in the nucleus of estrogen agonist-induced cancer-associ…	EGFR	2.38872	1.25624	0.00267087	2.57335	46	0.0371018	1.4306
[R].KGAAPAPPR.[K]	1xBiotin [K1]	8	1	Q13428-1	Q13428-1 [449-457]	Q13428-1 1xBiotin [K449]	Treacle protein [OS=Homo sapiens]	1	1090.58	3414.88	2276.45	2178.31	8305.21	11954	9975.44	NoTM	outside	Nucleus, nucleolus	TCOF1	3.84193	1.94183	0.00270566	2.56773	47	0.0367854	1.43432
[K].EKTHINIVVIGHVDSGK.[S]	1xBiotin [K2]	4	1	P68104	P68104 [4-20]	P68104 1xBiotin [K5]	Elongation factor 1-alpha 1 [OS=Homo sapiens]	1	2072.1	5362.4	2166.44	3619.66	23756.4	18057.5	16539.7	NoTM	outside	Cytoplasm;Nucleus;Nucleus, nucleolus;Cell membrane;Translocates together with ZPR1 from the cytoplasm to the nucleus and nucleolus after treatment with mitogens (PubMed:8650580);Localization at the cell membrane depends on EEF1A1 phosphorylation status and the presence of PPP1R16B (PubMed:26497934)	EEF1A1	5.2342	2.38797	0.0027264	2.56441	48	0.0362952	1.44015
[R].AGVHIKLPNLGK.[H]	1xBiotin [K6]	1	2	P12277	P12277 [293-304]	P12277 1xBiotin [K298]	Creatine kinase B-type [OS=Homo sapiens]	1	1472.84	2051.89	5121.67	3720.62	28851.4	21733	19272.4	NoTM	outside	Cytoplasm	CKB	6.41229	2.68084	0.00282781	2.54855	49	0.0368769	1.43325
[K].SPAKSPNPSTPR.[G]	1xBiotin [K4]	2	2	O76021	O76021 [392-403]	O76021 1xBiotin [K395]	Ribosomal L1 domain-containing protein 1 [OS=Homo sapiens]	1	1464.73	14957.4	16376.7	15865.7	9710.39	8888.99	6019.37	NoTM	outside	Nucleus, nucleolus	RSL1D1	0.521585	-0.939024	0.00323032	2.49075	50	0.0412835	1.38422
[R].LDPFADGGKTPDPK.[M]	1xBiotin [K9]	1	1	O75533-1	O75533-1 [133-146]	O75533-1 1xBiotin [K141]	splicing factor 3B subunit 1 [OS=Homo sapiens]	1	1683.8	42537.9	65543.3	62244.4	8775.4	12287.2	13356.4	NoTM	outside	Nucleus;Nucleus speckle	SF3B1	0.202077	-2.30702	0.00345453	2.46161	51	0.0432832	1.36368
[K].IVLQKYHTINGHNAEVR.[K]	1xBiotin [K5]	2	3	P22626	P22626 [169-185]	P22626 1xBiotin [K173]	heterogeneous nuclear ribonucleoproteins A2/B1 [OS=Homo sapiens]	1	2218.15	2324.48	3084.1	3245.79	47747.6	39081.9	27917.7	NoTM	outside	Nucleus;Nucleus, nucleoplasm;Cytoplasm;Cytoplasmic granule;Secreted, extracellular exosome;Component of ribonucleosomes (PubMed:17289661);Not found in the nucleolus (PubMed:17289661);Found in exosomes following sumoylation (PubMed:24356509);[Isoform A2]: Nucleus;Cytoplasm;[Isoform A2]: Nucleus;Cytoplasm	HNRNPA2B1	13.2589	3.72889	0.00353747	2.45131	52	0.04347	1.36181
[K].KEDLYLKPIQR.[T]	1xBiotin [K1]	1	1	P13639	P13639 [439-449]	P13639 1xBiotin [K439]	Elongation factor 2 [OS=Homo sapiens]	1	1628.88	5387.52	3432.02	2142.41	13938.1	12005.6	10439.2	NoTM	outside	Cytoplasm;Nucleus	EEF2	3.31901	1.73075	0.00359901	2.44382	53	0.0433918	1.36259
[-G].MQIFVKTLTGK.[T]	1xBiotin [K6]; 1xOxidation [M1]	4	6	P62987	P62987 [1-11]	P62987 1xBiotin [K6]	Ubiquitin-60S ribosomal protein L40 [OS=Homo sapiens]	1	1507.8	15454.4	11230.3	9399.28	45275.2	38833.7	31565.1	NoTM	outside	[Ubiquitin]: Cytoplasm;Nucleus;[60S ribosomal protein L40]: Cytoplasm;[60S ribosomal protein L40]: Cytoplasm	UBA52	3.20569	1.68063	0.00364759	2.43799	54	0.0431631	1.36489
[R].IAKAVNEK.[S]	1xBiotin [K3]	2	3	P06733-1	P06733-1 [328-335]	P06733-1 1xBiotin [K330]	alpha-enolase [OS=Homo sapiens]	1	1098.6	4621.72	4373.42	2427.54	41930.6	36411.9	25025.1	NoTM	outside	Cytoplasm;Cell membrane;Cytoplasm, myofibril, sarcomere, M line;ENO1 is localized to the M line;[Isoform MBP-1]: Nucleus;[Isoform MBP-1]: Nucleus	ENO1	9.04933	3.17781	0.0036568	2.4369	55	0.0424853	1.37176
[K].AAGAGKVTK.[S]	1xBiotin [K6]	3	5	P68104	P68104 [445-453]	P68104 1xBiotin [K450]	Elongation factor 1-alpha 1 [OS=Homo sapiens]	1	1028.56	47714.9	37060	42039.5	116543	102644	84771.4	NoTM	outside	Cytoplasm;Nucleus;Nucleus, nucleolus;Cell membrane;Translocates together with ZPR1 from the cytoplasm to the nucleus and nucleolus after treatment with mitogens (PubMed:8650580);Localization at the cell membrane depends on EEF1A1 phosphorylation status and the presence of PPP1R16B (PubMed:26497934)	EEF1A1	2.39688	1.26116	0.0036775	2.43445	56	0.041963	1.37713
[R].DPASKR.[S]	1xBiotin [K5]	2	2	P22626	P22626 [55-60]	P22626 1xBiotin [K59]	heterogeneous nuclear ribonucleoproteins A2/B1 [OS=Homo sapiens]	1	899.44	2787.9	4074.75	5085.84	16328.8	19737.3	13004.6	NoTM	outside	Nucleus;Nucleus, nucleoplasm;Cytoplasm;Cytoplasmic granule;Secreted, extracellular exosome;Component of ribonucleosomes (PubMed:17289661);Not found in the nucleolus (PubMed:17289661);Found in exosomes following sumoylation (PubMed:24356509);[Isoform A2]: Nucleus;Cytoplasm;[Isoform A2]: Nucleus;Cytoplasm	HNRNPA2B1	4.10685	2.03803	0.0038267	2.41718	57	0.0428993	1.36755
[K].AKGLVPEDDTK.[E]	1xBiotin [K2]	2	1	Q15459	Q15459 [532-542]	Q15459 1xBiotin [K533]	splicing factor 3A subunit 1 [OS=Homo sapiens]	1	1398.69	4413.77	2178.51	3461.17	8342.82	8392.75	7132.11	NoTM	outside	Nucleus;Nucleus speckle	SF3A1	2.37408	1.24737	0.0038857	2.41053	58	0.0428097	1.36846
[K].GTLLGESLKLK.[V]	1xBiotin [K9]	2	3	O75663	O75663 [118-128]	O75663 1xBiotin [K126]	TIP41-like protein [OS=Homo sapiens]	1	1384.79	45935.7	31840.1	29477.2	5786.41	5769.59	3023.29	NoTM	outside	Cytoplasm	TIPRL	0.135934	-2.87903	0.00408128	2.3892	59	0.0442024	1.35455
[K].TTFVKR.[H]	1xBiotin [K5]	1	1	P62826	P62826 [24-29]	P62826 1xBiotin [K28]	GTP-binding nuclear protein RAN [OS=Homo sapiens]	1	977.524	2720.67	3689.1	6309.87	56894.1	39679.4	35127.7	NoTM	outside	Nucleus;Nucleus envelope;Cytoplasm, cytosol;Cytoplasm;Melanosome;Becomes dispersed throughout the cytoplasm during mitosis (PubMed:8421051, PubMed:12194828);Identified by mass spectrometry in melanosome fractions from stage I to stage IV (PubMed:17081065)	RAN	10.3542	3.37214	0.00411183	2.38597	60	0.0437909	1.35862
[R].KISSPTGSK.[D]	1xBiotin [K1]	2	1	Q99623	Q99623 [89-97]	Q99623 1xBiotin [K89]	Prohibitin-2 [OS=Homo sapiens]	1	1130.59	2288.76	2466.68	4527.79	15037.4	13384.8	9993.31	NoTM	outside	Mitochondrion inner membrane;Cytoplasm;Nucleus	PHB2	4.13816	2.04899	0.00416104	2.3808	61	0.0435886	1.36063
[K].IMKDILEK.[K]	1xBiotin [K3]; 1xOxidation [M2]	2	2	P07900	P07900 [574-581]	P07900 1xBiotin [K576]	Heat shock protein HSP 90-alpha [OS=Homo sapiens]	1	1231.64	5706.72	4283.6	2496.63	15885.3	13068.5	11469.5	NoTM	outside	Nucleus;Cytoplasm;Melanosome;Cell membrane	HSP90AA1	3.23723	1.69476	0.00424294	2.37233	62	0.0437296	1.35922
[R].EESGKPGAHVTVKK.[L]	1xBiotin [K]	2	4	P22626	P22626 [100-113]	P22626 1xBiotin [K]	heterogeneous nuclear ribonucleoproteins A2/B1 [OS=Homo sapiens]	1	1692.87	9528.26	14106.6	24334	90117.8	68408.6	60815.4	NoTM	outside	Nucleus;Nucleus, nucleoplasm;Cytoplasm;Cytoplasmic granule;Secreted, extracellular exosome;Component of ribonucleosomes (PubMed:17289661);Not found in the nucleolus (PubMed:17289661);Found in exosomes following sumoylation (PubMed:24356509);[Isoform A2]: Nucleus;Cytoplasm;[Isoform A2]: Nucleus;Cytoplasm	HNRNPA2B1	4.57259	2.19301	0.00433199	2.36331	63	0.0439388	1.35715
[R].ISKEEAMR.[W]	1xBiotin [K3]; 1xOxidation [M7]	2	1	P62913	P62913 [157-164]	P62913 1xBiotin [K159]	60S ribosomal protein L11 [OS=Homo sapiens]	1	1205.57	3738.42	2705.73	3831.27	10123.1	10319.1	7399.87	NoTM	outside	Nucleus, nucleolus;Cytoplasm	RPL11	2.70957	1.43807	0.00438223	2.3583	64	0.0437538	1.35898
[R].EAPHVKNNAIISLR.[K]	1xBiotin [K6]	1	1	Q9ULF5	Q9ULF5 [312-325]	Q9ULF5 1xBiotin [K317]	Zinc transporter ZIP10 [OS=Homo sapiens]	1	1787.96	4271.71	2077.63	5484.94	11627.3	16027.9	16947.7	HasTM	outside	Membrane	SLC39A10	3.76896	1.91417	0.00472231	2.32585	65	0.0464239	1.33326
[K].KLFVGGLK.[EG]	1xBiotin [K1]	9	4	P51991-1; P22626; P09651-1	P51991-1 [127-134]; P22626 [113-120]; P09651-1 [106-113]	P51991-1 1xBiotin [K127]; P22626 1xBiotin [K113]; P09651-1 1xBiotin [K106]	Heterogeneous nuclear ribonucleoprotein A3 [OS=Homo sapiens] heterogeneous nuclear ribonucleoproteins A2/B1 [OS=Homo sapiens] Heterogeneous nuclear ribonucleoprotein A1 [OS=Homo sapiens]	1	1087.63	28522.6	18165.3	37339.1	143384	102135	98158.6	NoTM	outside	Nucleus	HNRNPA3	4.09009	2.03213	0.005025	2.29886	66	0.0486512	1.31291
[K].AENKGISPVVSEHR.[K]	1xBiotin [K4]	4	7	Q99700-1	Q99700-1 [778-791]	Q99700-1 1xBiotin [K781]	Ataxin-2 [OS=Homo sapiens]	1	1748.87	53863.2	71839.2	64636.8	30639.6	36344.4	29649.9	NoTM	outside	Cytoplasm	ATXN2	0.507693	-0.977972	0.0051452	2.2886	67	0.0490714	1.30917
[K].GKSADFTNFDPR.[G]	1xBiotin [K2]	1	2	P00918	P00918 [170-181]	P00918 1xBiotin [K171]	Carbonic anhydrase 2 [OS=Homo sapiens]	1	1580.72	22397.3	19326.7	13961.8	4235.35	4628.37	5389.53	NoTM	outside	Cytoplasm;Cell membrane;Displaced from the cytosolic surface of the cell membrane by PKC in phorbol myristate acetate (PMA)-induced cells	CA2	0.255959	-1.96602	0.00515434	2.28783	68	0.0484356	1.31484
[K].IFQKGESPVDYDGGR.[T]	1xBiotin [K4]	5	1	Q15084-1	Q15084-1 [242-256]	Q15084-1 1xBiotin [K245]	Protein disulfide-isomerase A6 [OS=Homo sapiens]	1	1893.88	44657.5	28919.5	33138.4	11630.9	5795.77	5022.97	NoTM	outside	Endoplasmic reticulum lumen;Cell membrane;Melanosome	PDIA6	0.21037	-2.249	0.00547261	2.26181	69	0.0506812	1.29515
[K].KDISQNKR.[A]	1xBiotin [K1]	3	3	P0DMV8	P0DMV8 [251-258]	P0DMV8 1xBiotin [K251]	heat shock 70 kDa protein 1A [OS=Homo sapiens]	2	1214.63	5440.17	19881.8	13254.7	110614	128103	72994.5	NoTM	outside	Cytoplasm;Nucleus;Cytoplasm, cytoskeleton, microtubule organizing center, centrosome	HSPA1A	8.0803	3.01441	0.00560204	2.25165	70	0.0511387	1.29125
[K].KELTQIK.[QT]	1xBiotin [K1]	7	2	P07910-1	P07910-1 [198-204]	P07910-1 1xBiotin [K198]	Heterogeneous nuclear ribonucleoproteins C1/C2 [OS=Homo sapiens]	1	1085.6	4749.61	2463.78	4736.85	32615.7	23370.3	19661.1	NoTM	outside	Nucleus	HNRNPC	6.33017	2.66224	0.00566181	2.24704	71	0.0509563	1.2928
[R].DTPAKNAQK.[S]	1xBiotin [K5]	2	2	P06748	P06748 [198-206]	P06748 1xBiotin [K202]	Nucleophosmin [OS=Homo sapiens]	1	1198.59	3221.1	7531.71	2721.77	21525.6	18536.1	14408.8	NoTM	outside	Nucleus, nucleolus;Nucleus, nucleoplasm;Cytoplasm, cytoskeleton, microtubule organizing center, centrosome;Has been found in the cytoplasm in patients with primary acute myelogenous leukemia (AML), but not with secondary AML;Can shuttle between cytoplasm and nucleus;Co- localizes with the methylated form of RPS10 in the granular component (GC) region of the nucleolus;Colocalized with nucleolin an…	NPM1	4.04247	2.01524	0.00598941	2.22262	72	0.0531561	1.27445
[R].NFLKEDAMKTK.[T]	1xBiotin [K9]; 1xOxidation [M8]	1	1	Q29983	Q29983 [167-177]	Q29983 1xBiotin [K175]	MHC class I polypeptide-related sequence A [OS=Homo sapiens]	2	1566.77	3907.81	2831.07	5159.28	15600.5	24574.9	17004.2	HasTM	outside	Cell membrane;Cytoplasm;Infection with human adenovirus 5 suppresses cell surface expression due to the adenoviral E3-19K protein which causes retention in the endoplasmic reticulum	MICA	4.80575	2.26476	0.00623612	2.20509	73	0.0545874	1.26291
[K].VKVGVNGFGR.[I]	1xBiotin [K2]	1	2	P04406-1	P04406-1 [4-13]	P04406-1 1xBiotin [K5]	glyceraldehyde-3-phosphate dehydrogenase [OS=Homo sapiens]	1	1258.67	2447.83	2653.08	4659.33	22205.9	25101.9	14305.9	NoTM	outside	Cytoplasm, cytosol;Nucleus;Cytoplasm, perinuclear region;Membrane;Cytoplasm, cytoskeleton;Postnuclear and Perinuclear regions	GAPDH	6.31273	2.65826	0.00636678	2.19608	74	0.054978	1.25981
[R].TLKIPAMTIAK.[N]	1xBiotin [K3]; 1xOxidation [M7]	1	1	P10809	P10809 [471-481]	P10809 1xBiotin [K473]	60 kDa heat shock protein, mitochondrial [OS=Homo sapiens]	1	1428.8	3283.68	4257.47	5636.57	20794.3	14741.8	13755.9	NoTM	outside	Mitochondrion matrix	HSPD1	3.74056	1.90325	0.0064034	2.19359	75	0.054557	1.26315
[R].SSGPYGGGGQYFAKPR.[N]	1xBiotin [K14]	3	3	P09651-1	P09651-1 [337-352]	P09651-1 1xBiotin [K350]	Heterogeneous nuclear ribonucleoprotein A1 [OS=Homo sapiens]	0	1854.86	3849.39	8939.39	2619.9	23296	20034.2	16186.6	NoTM	outside	Nucleus;Cytoplasm;Shuttles continuously between the nucleus and the cytoplasm along with mRNA;Component of ribonucleosomes (PubMed:17289661);Cytoplasm;Cytoplasm	HNRNPA1	3.86254	1.94955	0.00647127	2.18901	76	0.0544098	1.26432
[K].LDKAQIHDLVLVGGSTR.[I]	1xBiotin [K3]	2	8	P0DMV8	P0DMV8 [326-342]	P0DMV8 1xBiotin [K328]	heat shock 70 kDa protein 1A [OS=Homo sapiens]	1	2048.1	18314.1	42964.1	61641.3	329363	365752	204331	NoTM	outside	Cytoplasm;Nucleus;Cytoplasm, cytoskeleton, microtubule organizing center, centrosome	HSPA1A	7.31735	2.87132	0.00684433	2.16467	77	0.056799	1.24566
[-].MPEPAKSAPAPK.[K]	1xBiotin [K6]; 1xMet-loss [N-Term]	5	4	Q16778	Q16778 [1-12]	Q16778 1xBiotin [K6]; 1xMet-loss [N-Term]	Histone H2B type 2-E [OS=Homo sapiens]	1	1318.68	2254.17	3116.46	3067.58	29440.5	25363.7	15811.5	NoTM	outside	Nucleus;Chromosome	HIST2H2BE	8.36857	3.06498	0.00688894	2.16185	78	0.0564363	1.24844
[K].IKTLFPLIEAK.[K]	1xBiotin [K2]	1	6	P13010	P13010 [533-543]	P13010 1xBiotin [K534]	X-ray repair cross-complementing protein 5 [OS=Homo sapiens]	1	1498.87	75101	57044.5	58102.8	35674.8	26283.7	28617.6	NoTM	outside	Nucleus;Nucleus, nucleolus;Chromosome	XRCC5	0.476094	-1.07068	0.00691187	2.1604	79	0.0559074	1.25253
[R].VTGTNKGISPVPINLR.[V]	1xBiotin [K6]	9	13	P50570-1	P50570-1 [108-123]	P50570-1 1xBiotin [K113]	Dynamin-2 [OS=Homo sapiens]	1	1892.04	93957	85269.7	69566.8	48693.2	44871.3	45321.2	NoTM	outside	Cytoplasm;Cytoplasm, cytoskeleton;Cell junction;Membrane, clathrin-coated pit;Cell junction, synapse, postsynaptic density;Cell junction, synapse;Midbody;Cell projection, phagocytic cup;Cytoplasmic vesicle, phagosome membrane;Microtubule-associated;Also found in the postsynaptic density of neuronal cells;Co-localizes with PIK3C3 and RAB5A to the nascent phagosome (By similarity)	DNM2	0.558237	-0.841051	0.00717406	2.14424	80	0.0573028	1.24182
[K].IGHPAPNFKATAVMPDGQFK.[D]	1xBiotin [K9]; 1xOxidation [M14]	1	1	Q06830	Q06830 [8-27]	Q06830 1xBiotin [K16]	peroxiredoxin-1 [OS=Homo sapiens]	1	2368.16	4890.06	2005.1	3389.64	14717.8	12536.9	9400.8	NoTM	outside	Cytoplasm;Melanosome	PRDX1	3.56405	1.83352	0.00742401	2.12936	81	0.0585672	1.23235
[K].GQPLCVLSAMKMETVVTSPMEGTVR.[K]	1xBiotin [K11]; 1xCarbamidomethyl [C5]; 2xOxidation [M12; M]	1	53	P11498	P11498 [1134-1158]	P11498 1xBiotin [K1144]	pyruvate carboxylase, mitochondrial [OS=Homo sapiens]	1	2979.41	605398	679981	764261	264719	417119	387943	NoTM	outside	Mitochondrion matrix	PC	0.521936	-0.938055	0.00755171	2.12195	82	0.0588481	1.23027
[K].MQASIEKGGSLPK.[V]	1xBiotin [K7]; 1xOxidation [M1]	2	2	P06748	P06748 [251-263]	P06748 1xBiotin [K257]	Nucleophosmin [OS=Homo sapiens]	1	1587.79	2468.21	2012.83	4958.65	11770.6	10251.4	8154.23	NoTM	outside	Nucleus, nucleolus;Nucleus, nucleoplasm;Cytoplasm, cytoskeleton, microtubule organizing center, centrosome;Has been found in the cytoplasm in patients with primary acute myelogenous leukemia (AML), but not with secondary AML;Can shuttle between cytoplasm and nucleus;Co- localizes with the methylated form of RPS10 in the granular component (GC) region of the nucleolus;Colocalized with nucleolin an…	NPM1	3.19674	1.6766	0.00767281	2.11505	83	0.0590714	1.22862
[K].EVSTYIKK.[I]	1xBiotin [K]	3	4	P68104	P68104 [173-180]	P68104 1xBiotin [K]	Elongation factor 1-alpha 1 [OS=Homo sapiens]	1	1193.62	4548.16	2372.58	4076.95	49510.2	43414.9	25519.7	NoTM	outside	Cytoplasm;Nucleus;Nucleus, nucleolus;Cell membrane;Translocates together with ZPR1 from the cytoplasm to the nucleus and nucleolus after treatment with mitogens (PubMed:8650580);Localization at the cell membrane depends on EEF1A1 phosphorylation status and the presence of PPP1R16B (PubMed:26497934)	EEF1A1	10.77	3.42894	0.00773863	2.11134	84	0.0588689	1.23011
[R].STLEPVEKALR.[D]	1xBiotin [K8]	4	1	P0DMV8	P0DMV8 [312-322]	P0DMV8 1xBiotin [K319]	heat shock 70 kDa protein 1A [OS=Homo sapiens]	1	1468.78	3589.92	2511.63	4649.5	21079.5	14235.9	13212.9	NoTM	outside	Cytoplasm;Nucleus;Cytoplasm, cytoskeleton, microtubule organizing center, centrosome	HSPA1A	4.51382	2.17435	0.0077771	2.10918	85	0.0584655	1.2331
[R].GFPTIKIFQK.[G]	1xBiotin [K6]	5	2	Q15084-1	Q15084-1 [236-245]	Q15084-1 1xBiotin [K241]	Protein disulfide-isomerase A6 [OS=Homo sapiens]	1	1404.77	22745.6	16122.5	15679.2	7702.26	3871.14	5560.86	NoTM	outside	Endoplasmic reticulum lumen;Cell membrane;Melanosome	PDIA6	0.314117	-1.67062	0.00798568	2.09769	86	0.0593355	1.22669
[R].VSAKNALESYAFNMK.[S]	1xBiotin [K4]; 1xOxidation [M14]	2	7	P0DMV8	P0DMV8 [536-550]	P0DMV8 1xBiotin [K539]	heat shock 70 kDa protein 1A [OS=Homo sapiens]	1	1914.91	4983.43	5536.36	2866.73	56816.9	65669.9	33354.2	NoTM	outside	Cytoplasm;Nucleus;Cytoplasm, cytoskeleton, microtubule organizing center, centrosome	HSPA1A	11.6416	3.54122	0.00799954	2.09693	87	0.0587553	1.23095
[K].TPKTPK.[G]	1xBiotin [K3]	3	3	P06748	P06748 [234-239]	P06748 1xBiotin [K236]	Nucleophosmin [OS=Homo sapiens]	1	897.486	2368.5	2171.51	2908.43	34613.3	29532.2	17591.5	NoTM	outside	Nucleus, nucleolus;Nucleus, nucleoplasm;Cytoplasm, cytoskeleton, microtubule organizing center, centrosome;Has been found in the cytoplasm in patients with primary acute myelogenous leukemia (AML), but not with secondary AML;Can shuttle between cytoplasm and nucleus;Co- localizes with the methylated form of RPS10 in the granular component (GC) region of the nucleolus;Colocalized with nucleolin an…	NPM1	10.9737	3.45598	0.00802262	2.09568	88	0.0582552	1.23467
[RK].VVEPKR.[AIQ]	1xBiotin [K5]	11	3	P51991-1; P22626; P09651-1	P51991-1 [104-109]; P22626 [90-95]; P09651-1 [83-88]	P51991-1 1xBiotin [K108]; P22626 1xBiotin [K94]; P09651-1 1xBiotin [K87]	Heterogeneous nuclear ribonucleoprotein A3 [OS=Homo sapiens] heterogeneous nuclear ribonucleoproteins A2/B1 [OS=Homo sapiens] Heterogeneous nuclear ribonucleoprotein A1 [OS=Homo sapiens]	1	953.524	24523	18668.2	2681.51	138762	95797.7	81489	NoTM	outside	Nucleus	HNRNPA3	6.88968	2.78444	0.00808444	2.09235	89	0.0580445	1.23624
[K].HAVSEGTKAVTK.[Y]	1xBiotin [K8]	16	8	Q16778; P58876; Q93079	Q16778 [110-121]; P58876 [110-121]; Q93079 [110-121]	Q16778 1xBiotin [K117]; P58876 1xBiotin [K117]; Q93079 1xBiotin [K117]	Histone H2B type 2-E [OS=Homo sapiens] Histone H2B type 1-D [OS=Homo sapiens] Histone H2B type 1-H [OS=Homo sapiens]	1	1453.75	4910.46	22486.8	10655	204249	169852	103238	NoTM	outside	Nucleus;Chromosome	HIST2H2BE	12.5443	3.64896	0.00824895	2.0836	90	0.0585675	1.23234
[R].EMLQQSKILK.[VY]	1xBiotin [K7]; 1xOxidation [M2]	4	2	P07900; P08238	P07900 [401-410]; P08238 [393-402]	P07900 1xBiotin [K407]; P08238 1xBiotin [K399]	Heat shock protein HSP 90-alpha [OS=Homo sapiens] Heat shock protein HSP 90-beta [OS=Homo sapiens]	1	1459.76	2251.82	2430.93	5539.32	18891.9	15906.8	11281.9	NoTM	outside	Nucleus;Cytoplasm;Melanosome;Cell membrane	HSP90AA1	4.50795	2.17247	0.00825759	2.08315	91	0.0579846	1.23669
[R].AMTKDNNLLGR.[F]	1xBiotin [K4]; 1xOxidation [M2]	4	8	P0DMV8	P0DMV8 [448-458]	P0DMV8 1xBiotin [K451]	heat shock 70 kDa protein 1A [OS=Homo sapiens]	1	1474.71	19466.6	21994.9	5886.11	180417	185090	97694.9	NoTM	outside	Cytoplasm;Nucleus;Cytoplasm, cytoskeleton, microtubule organizing center, centrosome	HSPA1A	9.78301	3.29028	0.00858896	2.06606	92	0.059656	1.22435
[R].LAHYNKR.[S]	1xBiotin [K6]	16	9	Q16778; P58876; Q93079	Q16778 [81-87]; P58876 [81-87]; Q93079 [81-87]	Q16778 1xBiotin [K86]; P58876 1xBiotin [K86]; Q93079 1xBiotin [K86]	Histone H2B type 2-E [OS=Homo sapiens] Histone H2B type 1-D [OS=Homo sapiens] Histone H2B type 1-H [OS=Homo sapiens]	1	1127.58	4293.7	24448.1	35276.3	180072	137731	100000	NoTM	outside	Nucleus;Chromosome	HIST2H2BE	6.52632	2.70627	0.00899403	2.04605	93	0.0617977	1.20903
[K].TGFGGKFGVQSER.[Q]	1xBiotin [K6]	1	6	Q14247-1	Q14247-1 [267-279]	Q14247-1 1xBiotin [K272]	Src substrate cortactin [OS=Homo sapiens]	1	1595.76	61769.4	37853.7	41808.2	12931.4	10963	12450.1	NoTM	outside	Cytoplasm, cytoskeleton;Cell projection, lamellipodium;Cell projection, ruffle;Cell projection, dendrite;Cell projection;Cell membrane;Cell projection, podosome;Cell junction;Cell junction, focal adhesion;Membrane, clathrin-coated pit;Cell projection, dendritic spine;Cytoplasm, cell cortex;Associated with membrane ruffles and lamellipodia;In the presence of CTTNBP2NL, colocalizes with stress fibe…	CTTN	0.256976	-1.96029	0.00918747	2.0368	94	0.0624552	1.20443
[K].TIAPALVSKK.[L]	1xBiotin [K]	1	3	P06733-1	P06733-1 [72-81]	P06733-1 1xBiotin [K]	alpha-enolase [OS=Homo sapiens]	1	1253.73	4971.77	7013.07	5896.42	56899.5	49068.3	29075.6	NoTM	outside	Cytoplasm;Cell membrane;Cytoplasm, myofibril, sarcomere, M line;ENO1 is localized to the M line;[Isoform MBP-1]: Nucleus;[Isoform MBP-1]: Nucleus	ENO1	7.55223	2.9169	0.00929078	2.03195	95	0.0624927	1.20417
[K].AQIEKR.[I]	1xBiotin [K5]	1	1	P10809	P10809 [365-370]	P10809 1xBiotin [K369]	60 kDa heat shock protein, mitochondrial [OS=Homo sapiens]	1	970.514	4447.85	2756.17	3166.2	23664.1	20467.3	12635.5	NoTM	outside	Mitochondrion matrix	HSPD1	5.47404	2.4526	0.00955586	2.01973	96	0.0636062	1.1965
[K].LLLQVQHASKQITADK.[Q]	1xBiotin [K]	1	2	P05141	P05141 [34-49]	P05141 1xBiotin [K]	ADP/ATP translocase 2 [OS=Homo sapiens]	1	2019.11	2162.99	2038.49	2029.33	13808.6	10282.2	7524.17	HasTM	outside	Mitochondrion inner membrane;Multi-pass membrane protein	SLC25A5	5.07397	2.34311	0.00965299	2.01534	97	0.0635903	1.19661
[K].DHIMEIFSTYGKIK.[M]	1xBiotin [K]; 1xOxidation [M4]	3	15	Q15287-1	Q15287-1 [175-188]	Q15287-1 1xBiotin [K]	RNA-binding protein with serine-rich domain 1 [OS=Homo sapiens]	1	1923.93	2715.33	5678.34	17440.4	118764	252977	217200	NoTM	outside	Nucleus;Nucleus speckle;Cytoplasm;Colocalizes with the core EJC, ALYREF/THOC4, NXF1 and UAP56 in the nucleus and nuclear speckles	RNPS1	22.797	4.51077	0.00967142	2.01451	98	0.0630616	1.20023
[R].VAPEEHPVLLTEAPLNPKANR.[E]	1xBiotin [K18]	2	4	P60709	P60709 [96-116]	P60709 1xBiotin [K113]	Actin, cytoplasmic 1 [OS=Homo sapiens]	1	2521.32	18285.7	14305.5	4500.44	86422.9	71355.2	47382.3	NoTM	outside	Cytoplasm, cytoskeleton;Nucleus	ACTB	5.53118	2.46759	0.00975911	2.01059	99	0.0629906	1.20072
[K].GFGGKFGVQTDR.[Q]	1xBiotin [K5]	3	9	Q14247-1	Q14247-1 [231-242]	Q14247-1 1xBiotin [K235]	Src substrate cortactin [OS=Homo sapiens]	1	1494.72	153170	110301	95691.5	45280.7	36592.9	35008.1	NoTM	outside	Cytoplasm, cytoskeleton;Cell projection, lamellipodium;Cell projection, ruffle;Cell projection, dendrite;Cell projection;Cell membrane;Cell projection, podosome;Cell junction;Cell junction, focal adhesion;Membrane, clathrin-coated pit;Cell projection, dendritic spine;Cytoplasm, cell cortex;Associated with membrane ruffles and lamellipodia;In the presence of CTTNBP2NL, colocalizes with stress fibe…	CTTN	0.325429	-1.61959	0.0100003	1.99999	100	0.0639019	1.19449
[R].LAKYNQLLR.[I]	1xBiotin [K3]	2	2	P06733-1	P06733-1 [404-412]	P06733-1 1xBiotin [K406]	alpha-enolase [OS=Homo sapiens]	1	1344.75	5890.34	2262.96	3648.45	46135.1	31559.8	24168.4	NoTM	outside	Cytoplasm;Cell membrane;Cytoplasm, myofibril, sarcomere, M line;ENO1 is localized to the M line;[Isoform MBP-1]: Nucleus;[Isoform MBP-1]: Nucleus	ENO1	8.63121	3.10956	0.0101005	1.99566	101	0.0639031	1.19448
[K].AASGEAKPK.[AV]	1xBiotin [K7]	3	3	P10412; P16403	P10412 [111-119]; P16403 [111-119]	P10412 1xBiotin [K117]; P16403 1xBiotin [K117]	Histone H1.4 [OS=Homo sapiens] Histone H1.2 [OS=Homo sapiens]	0	1084.55	4026.4	2142.86	5185.46	27405.5	18702	15537.4	NoTM	outside	Nucleus;Chromosome;Dysplays a punctuate staining pattern in the nucleus	HIST1H1E	5.42901	2.44069	0.0101562	1.99327	102	0.0636254	1.19637
[R].KFGDPVVQSDMK.[H]	1xBiotin [K1]; 1xOxidation [M11]	2	10	P0DMV8	P0DMV8 [77-88]	P0DMV8 1xBiotin [K77]	heat shock 70 kDa protein 1A [OS=Homo sapiens]	1	1592.74	2628.07	2727.08	5792.19	265881	169327	129396	NoTM	outside	Cytoplasm;Nucleus;Cytoplasm, cytoskeleton, microtubule organizing center, centrosome	HSPA1A	50.6492	5.66247	0.0104011	1.98292	103	0.0645273	1.19026
[K].DISQNKR.[A]	1xBiotin [K6]	3	5	P0DMV8	P0DMV8 [252-258]	P0DMV8 1xBiotin [K257]	heat shock 70 kDa protein 1A [OS=Homo sapiens]	1	1086.54	53870.5	33009.7	24573.6	236219	192380	127407	NoTM	outside	Cytoplasm;Nucleus;Cytoplasm, cytoskeleton, microtubule organizing center, centrosome	HSPA1A	4.98867	2.31866	0.0106598	1.97225	104	0.0654962	1.18378
[R].KVIDDTNITR.[L]	1xBiotin [K1]	1	1	P05783	P05783 [187-196]	P05783 1xBiotin [K187]	Keratin, type I cytoskeletal 18 [OS=Homo sapiens]	1	1400.72	5550.44	2596.56	5402.61	8759.04	9665.05	8692.31	NoTM	outside	Cytoplasm, perinuclear region;Nucleus, nucleolus	KRT18	2.00127	1.00091	0.011043	1.95691	105	0.0672047	1.1726
[R].DAKLDK.[AGS]	1xBiotin [K3]	7	1	P11142-1; P0DMV8	P11142-1 [323-328]; P0DMV8 [323-328]	P11142-1 1xBiotin [K325]; P0DMV8 1xBiotin [K325]	Heat shock cognate 71 kDa protein [OS=Homo sapiens] heat shock 70 kDa protein 1A [OS=Homo sapiens]	1	915.46	28885.2	17053.7	16293.7	158807	157250	83350	NoTM	outside	Cytoplasm;Melanosome;Nucleus, nucleolus;Cell membrane;Translocates rapidly from the cytoplasm to the nuclei, and especially to the nucleoli, upon heat shock	HSPA8	6.41796	2.68212	0.0112037	1.95064	106	0.0675393	1.17044
[K].DVNAAIATIKTK.[R]	1xBiotin [K10]	8	3	P68363	P68363 [327-338]	P68363 1xBiotin [K336]	Tubulin alpha-1B chain [OS=Homo sapiens]	1	1470.8	8865.39	5445.28	9334.63	24108.2	18050.4	16361.9	NoTM	outside	Cytoplasm, cytoskeleton	TUBA1B	2.47493	1.30739	0.0118426	1.92655	107	0.0707234	1.15044
[R].ISVYYNEATGGKYVPR.[A]	1xBiotin [K12]	1	12	P07437	P07437 [47-62]	P07437 1xBiotin [K58]	tubulin beta chain [OS=Homo sapiens]	1	2043	175223	135912	145272	105779	91427.9	86618.3	NoTM	outside	Cytoplasm, cytoskeleton	TUBB	0.621868	-0.68532	0.0120137	1.92032	108	0.0710812	1.14825
[K].AKMQASIEK.[GA]	1xBiotin [K2]; 1xOxidation [M3]	3	2	P06748	P06748 [249-257]	P06748 1xBiotin [K250]	Nucleophosmin [OS=Homo sapiens]	1	1247.61	5746.23	11814.2	3305.16	26900.3	24115.8	17875	NoTM	outside	Nucleus, nucleolus;Nucleus, nucleoplasm;Cytoplasm, cytoskeleton, microtubule organizing center, centrosome;Has been found in the cytoplasm in patients with primary acute myelogenous leukemia (AML), but not with secondary AML;Can shuttle between cytoplasm and nucleus;Co- localizes with the methylated form of RPS10 in the granular component (GC) region of the nucleolus;Colocalized with nucleolin an…	NPM1	3.30167	1.7232	0.0121196	1.91651	109	0.0710495	1.14844
[K].AVTKAQK.[K]	1xBiotin [K4]	13	5	Q16778; P58876; Q93079	Q16778 [18-24]; P58876 [18-24]; Q93079 [18-24]	Q16778 1xBiotin [K21]; P58876 1xBiotin [K21]; Q93079 1xBiotin [K21]	Histone H2B type 2-E [OS=Homo sapiens] Histone H2B type 1-D [OS=Homo sapiens] Histone H2B type 1-H [OS=Homo sapiens]	1	971.534	3156.45	14402.6	15662.9	79925	87386.6	44722.7	NoTM	outside	Nucleus;Chromosome	HIST2H2BE	6.38237	2.67409	0.0122807	1.91078	110	0.0713396	1.14667
[K].IFVGGIKEDTEEHHLR.[D]	1xBiotin [K7]	6	6	P22626; P09651-1	P22626 [114-129]; P09651-1 [107-122]	P22626 1xBiotin [K120]; P09651-1 1xBiotin [K113]	heterogeneous nuclear ribonucleoproteins A2/B1 [OS=Homo sapiens] Heterogeneous nuclear ribonucleoprotein A1 [OS=Homo sapiens]	1	2106.04	2887.75	2805.32	5708.24	79402.2	47344.2	40242.7	NoTM	outside	Nucleus;Nucleus, nucleoplasm;Cytoplasm;Cytoplasmic granule;Secreted, extracellular exosome;Component of ribonucleosomes (PubMed:17289661);Not found in the nucleolus (PubMed:17289661);Found in exosomes following sumoylation (PubMed:24356509);[Isoform A2]: Nucleus;Cytoplasm;[Isoform A2]: Nucleus;Cytoplasm	HNRNPA2B1	14.6465	3.87248	0.0127242	1.89537	111	0.07325	1.13519
[R].INVYYNEATGGKYVPR.[A]	1xBiotin [K12]	1	11	P68371	P68371 [47-62]	P68371 1xBiotin [K58]	Tubulin beta-4B chain [OS=Homo sapiens]	1	2070.01	87823.2	63494.3	69235.8	43760.9	41681.2	41647.2	NoTM	outside	Cytoplasm, cytoskeleton	TUBB4B	0.57623	-0.795285	0.0134333	1.87182	112	0.076642	1.11553
[K].TADEVPLKILAHNNFVGR.[L]	1xBiotin [K8]	1	5	Q9NZI8	Q9NZI8 [273-290]	Q9NZI8 1xBiotin [K280]	Insulin-like growth factor 2 mRNA-binding protein 1 [OS=Homo sapiens]	1	2220.16	79849.1	108903	139025	38978.4	38106.4	33292.9	NoTM	outside	Nucleus;Cytoplasm;Cytoplasm, perinuclear region;Cell projection, lamellipodium;Cell projection, dendrite;Cell projection, dendritic spine;Cell projection, growth cone;Cell projection, filopodium;Cell projection, axon;In the cytoplasm, localizes in cytoplasmic mRNP granules;Colocalizes with microtubules in growth cone filopodia and along neurites in neuronal cells (By similarity);Cytoplasmic coloc…	IGF2BP1	0.336746	-1.57027	0.0134843	1.87017	113	0.0762518	1.11775
[KR].LMKEILDK.[K]	1xBiotin [K3]; 1xOxidation [M2]	3	2	P08238	P08238 [566-573]	P08238 1xBiotin [K568]	Heat shock protein HSP 90-beta [OS=Homo sapiens]	1	1231.64	5539.65	2532.34	4243.97	11994.7	8493.43	9152.68	NoTM	outside	Cytoplasm;Melanosome;Nucleus;Secreted;Cell membrane;Translocates with BIRC2 from the nucleus to the cytoplasm during differentiation (PubMed:18239673);Secreted when associated with TGFB1 processed form (LAP) (PubMed:20599762)	HSP90AB1	2.4067	1.26706	0.0139634	1.85501	114	0.0782688	1.10641
[R].SAPGGGSKVPQK.[K]	1xBiotin [K8]	3	2	P06748	P06748 [143-154]	P06748 1xBiotin [K150]	Nucleophosmin [OS=Homo sapiens]	1	1338.68	5321.85	4431.48	2628.61	46087.4	30272.1	22746	NoTM	outside	Nucleus, nucleolus;Nucleus, nucleoplasm;Cytoplasm, cytoskeleton, microtubule organizing center, centrosome;Has been found in the cytoplasm in patients with primary acute myelogenous leukemia (AML), but not with secondary AML;Can shuttle between cytoplasm and nucleus;Co- localizes with the methylated form of RPS10 in the granular component (GC) region of the nucleolus;Colocalized with nucleolin an…	NPM1	8.00405	3.00073	0.0139724	1.85473	115	0.0776382	1.10992
[R].TGKGER.[N]	1xBiotin [K3]	2	3	P0DMV8	P0DMV8 [188-193]	P0DMV8 1xBiotin [K190]	heat shock 70 kDa protein 1A [OS=Homo sapiens]	1	873.425	4694.83	8982.52	8374.21	74950	58537.7	34833.7	NoTM	outside	Cytoplasm;Nucleus;Cytoplasm, cytoskeleton, microtubule organizing center, centrosome	HSPA1A	7.63308	2.93227	0.0141477	1.84932	116	0.0779341	1.10827
[K].GVSKAVEHINK.[T]	1xBiotin [K4]	1	5	P06733-1	P06733-1 [61-71]	P06733-1 1xBiotin [K64]	alpha-enolase [OS=Homo sapiens]	1	1407.74	12376.4	5223.96	14552.2	159038	105948	74871.3	NoTM	outside	Cytoplasm;Cell membrane;Cytoplasm, myofibril, sarcomere, M line;ENO1 is localized to the M line;[Isoform MBP-1]: Nucleus;[Isoform MBP-1]: Nucleus	ENO1	10.5701	3.40192	0.0142955	1.8448	117	0.0780753	1.10749
[K].LKDDEVAQLK.[K]	1xBiotin [K2]	1	3	P07195	P07195 [309-318]	P07195 1xBiotin [K310]	L-lactate dehydrogenase B chain [OS=Homo sapiens]	1	1384.71	3101.68	4668	3744.94	28923.4	21480.1	14176.8	NoTM	outside	Cytoplasm	LDHB	5.60855	2.48763	0.0144748	1.83939	118	0.0783845	1.10577
[R].LVSLIGSKTQIPTQR.[Y]	1xBiotin [K8]	2	1	P25786-1	P25786-1 [108-122]	P25786-1 1xBiotin [K115]	Proteasome subunit alpha type-1 [OS=Homo sapiens]	1	1867.05	2941.45	3106.39	4185.38	5371.71	4822.73	5386.79	NoTM	outside	Cytoplasm;Nucleus	PSMA1	1.52261	0.606549	0.01453	1.83774	119	0.0780223	1.10778
[K].FDLMYAKR.[A]	1xBiotin [K7]; 1xOxidation [M4]	12	5	P68363	P68363 [395-402]	P68363 1xBiotin [K401]	Tubulin alpha-1B chain [OS=Homo sapiens]	1	1285.61	11642.3	5655.9	5317.32	33092.5	22955.4	20387.8	NoTM	outside	Cytoplasm, cytoskeleton	TUBA1B	3.37978	1.75693	0.0150044	1.82378	120	0.0798983	1.09746
[K].AAFQSQYKSHFVAASLSNQK.[A]	1xBiotin [K8]	2	2	Q86XP3-1	Q86XP3-1 [701-720]	Q86XP3-1 1xBiotin [K708]	ATP-dependent RNA helicase DDX42 [OS=Homo sapiens]	1	2438.19	59864.3	137694	132991	5916.79	11006.4	4047.16	NoTM	outside	Cytoplasm;Nucleus speckle;Nucleus, Cajal body	DDX42	0.0634407	-3.97845	0.015077	1.82169	121	0.0796214	1.09897
[K].NQVALNPQNTVFDAKR.[L]	1xBiotin [K15]	2	10	P0DMV8	P0DMV8 [57-72]	P0DMV8 1xBiotin [K71]	heat shock 70 kDa protein 1A [OS=Homo sapiens]	1	2041.03	2530.8	5680.32	2365.1	128140	71179.5	62579.6	NoTM	outside	Cytoplasm;Nucleus;Cytoplasm, cytoskeleton, microtubule organizing center, centrosome	HSPA1A	24.763	4.63012	0.0152611	1.81641	122	0.0799331	1.09727
[K].EDAMKTK.[T]	1xBiotin [K5]; 1xOxidation [M4]	3	6	Q29983	Q29983 [171-177]	Q29983 1xBiotin [K175]	MHC class I polypeptide-related sequence A [OS=Homo sapiens]	1	1064.48	4943.55	2125.47	3336.29	68793.4	170061	130069	HasTM	outside	Cell membrane;Cytoplasm;Infection with human adenovirus 5 suppresses cell surface expression due to the adenoviral E3-19K protein which causes retention in the endoplasmic reticulum	MICA	35.4552	5.14793	0.0153908	1.81274	123	0.0799571	1.09714
[R].EATSPKANK.[E]	1xBiotin [K6]	1	1	P00533-1	P00533-1 [749-757]	P00533-1 1xBiotin [K754]	epidermal growth factor receptor [OS=Homo sapiens]	1	1171.58	3610.24	4647.06	4565.8	11146.1	9218.1	7122.18	HasTM	inside	Cell membrane;Endoplasmic reticulum membrane ;Single-pass type I membrane protein;Golgi apparatus membrane;Single-pass type I membrane protein;Nucleus membrane;Single-pass type I membrane protein;Endosome;Endosome membrane;Nucleus;Endocytosed upon activation by ligand (PubMed:2790960, PubMed:17182860, PubMed:27153536);Colocalized with GPER1 in the nucleus of estrogen agonist-induced cancer-associ…	EGFR	2.14351	1.09997	0.0155545	1.80814	124	0.080156	1.09606
[R].EDSQRPGAHLTVKK.[I]	1xBiotin [K13]	4	5	P09651-1	P09651-1 [93-106]	P09651-1 1xBiotin [K105]	Heterogeneous nuclear ribonucleoprotein A1 [OS=Homo sapiens]	1	1791.92	24295.3	22732	14626.3	58619.1	40692.2	41618.1	NoTM	outside	Nucleus;Cytoplasm;Shuttles continuously between the nucleus and the cytoplasm along with mRNA;Component of ribonucleosomes (PubMed:17289661);Cytoplasm;Cytoplasm	HNRNPA1	2.28583	1.19272	0.0156988	1.80413	125	0.080252	1.09554
[R].LLLPGELAKHAVSEGTK.[A]	1xBiotin [K]	16	10	Q16778; P58876; Q93079	Q16778 [101-117]; P58876 [101-117]; Q93079 [101-117]	Q16778 1xBiotin [K]; P58876 1xBiotin [K]; Q93079 1xBiotin [K]	Histone H2B type 2-E [OS=Homo sapiens] Histone H2B type 1-D [OS=Homo sapiens] Histone H2B type 1-H [OS=Homo sapiens]	1	1989.08	56428.9	47075.2	55565.9	490454	299252	251173	NoTM	outside	Nucleus;Chromosome	HIST2H2BE	6.54353	2.71007	0.0158786	1.79919	126	0.0805274	1.09406
[K].VQKLLQDFFNGR.[D]	1xBiotin [K3]	2	5	P0DMV8	P0DMV8 [346-357]	P0DMV8 1xBiotin [K348]	heat shock 70 kDa protein 1A [OS=Homo sapiens]	1	1690.87	2206.08	2337.84	10162.2	116044	80931.1	49947.5	NoTM	outside	Cytoplasm;Nucleus;Cytoplasm, cytoskeleton, microtubule organizing center, centrosome	HSPA1A	16.7904	4.06957	0.0159143	1.79821	127	0.0800727	1.09652
[R].FEQKGFR.[L]	1xBiotin [K4]	5	1	P15531	P15531 [28-34]	P15531 1xBiotin [K31]	Nucleoside diphosphate kinase A [OS=Homo sapiens]	1	1137.55	5154.89	5185.08	3738.9	25715.7	18585.2	13268.5	NoTM	outside	Cytoplasm;Nucleus	NME1	4.08907	2.03177	0.0163247	1.78716	128	0.0814957	1.08887
[K].KDISQNK.[R]	1xBiotin [K1]	3	8	P0DMV8	P0DMV8 [251-257]	P0DMV8 1xBiotin [K251]	heat shock 70 kDa protein 1A [OS=Homo sapiens]	1	1058.53	63111.7	39197.4	38675.2	453928	364084	203414	NoTM	outside	Cytoplasm;Nucleus;Cytoplasm, cytoskeleton, microtubule organizing center, centrosome	HSPA1A	7.24496	2.85698	0.0163844	1.78557	129	0.08116	1.09066
[R].KGVITVK.[D]	1xBiotin [K1]	1	1	P10809	P10809 [196-202]	P10809 1xBiotin [K196]	60 kDa heat shock protein, mitochondrial [OS=Homo sapiens]	1	970.575	2172.91	5823.1	4550.03	41825.1	38882.4	18872.1	NoTM	outside	Mitochondrion matrix	HSPD1	7.93713	2.98862	0.0164043	1.78504	130	0.0806335	1.09348
[K].GTGASGSFKLNK.[K]	1xBiotin [K9]	5	3	P10412; P16403	P10412 [98-109]; P16403 [98-109]	P10412 1xBiotin [K106]; P16403 1xBiotin [K106]	Histone H1.4 [OS=Homo sapiens] Histone H1.2 [OS=Homo sapiens]	1	1392.69	5612.06	2151.82	2183.18	20864.9	36063.4	18857.7	NoTM	outside	Nucleus;Chromosome;Dysplays a punctuate staining pattern in the nucleus	HIST1H1E	7.61894	2.92959	0.0167749	1.77534	131	0.0818258	1.08711
[K].KALAAAGYDVEK.[N]	1xBiotin [K1]	5	4	P10412; P16403	P10412 [64-75]; P16403 [64-75]	P10412 1xBiotin [K64]; P16403 1xBiotin [K64]	Histone H1.4 [OS=Homo sapiens] Histone H1.2 [OS=Homo sapiens]	1	1461.74	5265.74	2134.76	2364.22	93718	60874.8	40159.7	NoTM	outside	Nucleus;Chromosome;Dysplays a punctuate staining pattern in the nucleus	HIST1H1E	19.9445	4.31792	0.0168689	1.77291	132	0.081661	1.08799
[R].KESYSVYVYK.[V]	1xBiotin [K1]	10	3	P58876; Q93079	P58876 [35-44]; Q93079 [35-44]	P58876 1xBiotin [K35]; Q93079 1xBiotin [K35]	Histone H2B type 1-D [OS=Homo sapiens] Histone H2B type 1-H [OS=Homo sapiens]	1	1491.72	2531.02	9550.71	14444.9	33499	63695.4	42524.9	NoTM	outside	Nucleus;Chromosome	HIST1H2BD	5.26714	2.39702	0.0170607	1.768	133	0.0819682	1.08635
[K].IPVAIKELR.[E]	1xBiotin [K6]	1	1	P00533-1	P00533-1 [740-748]	P00533-1 1xBiotin [K745]	epidermal growth factor receptor [OS=Homo sapiens]	1	1264.74	22485.2	5543.32	18041.6	39251.8	32300	39199.6	HasTM	inside	Cell membrane;Endoplasmic reticulum membrane ;Single-pass type I membrane protein;Golgi apparatus membrane;Single-pass type I membrane protein;Nucleus membrane;Single-pass type I membrane protein;Endosome;Endosome membrane;Nucleus;Endocytosed upon activation by ligand (PubMed:2790960, PubMed:17182860, PubMed:27153536);Colocalized with GPER1 in the nucleus of estrogen agonist-induced cancer-associ…	EGFR	2.40398	1.26542	0.0180057	1.74459	134	0.0858631	1.06619
[K].VILHLKEDQTEYLEER.[RW]	1xBiotin [K6]	5	4	P07900; P08238	P07900 [186-201]; P08238 [181-196]	P07900 1xBiotin [K191]; P08238 1xBiotin [K186]	Heat shock protein HSP 90-alpha [OS=Homo sapiens] Heat shock protein HSP 90-beta [OS=Homo sapiens]	1	2241.12	5752.84	2693.72	5506.1	58315.7	32903.6	29196.8	NoTM	outside	Nucleus;Cytoplasm;Melanosome;Cell membrane	HSP90AA1	8.63033	3.10942	0.0182121	1.73964	135	0.0862042	1.06447
[K].IKDTVLQR.[T]	1xBiotin [K2]	2	1	P22102-1	P22102-1 [250-257]	P22102-1 1xBiotin [K251]	trifunctional purine biosynthetic protein adenosine-3 [OS=Homo sapiens]	1	1198.66	3011.8	5277.42	5007.97	19429.2	12475.4	11403.4	NoTM	outside	NO_DATA	GART	3.25693	1.70351	0.0186955	1.72826	136	0.0878414	1.0563
[K].KHLEINPDHSIIETLR.[Q]	1xBiotin [K1]	2	3	P07900	P07900 [632-647]	P07900 1xBiotin [K632]	Heat shock protein HSP 90-alpha [OS=Homo sapiens]	1	2141.12	3634.25	5332.04	4667.84	33003.6	24820.7	15179.3	NoTM	outside	Nucleus;Cytoplasm;Melanosome;Cell membrane	HSP90AA1	5.35448	2.42075	0.0187096	1.72794	137	0.0872659	1.05916
[R].KASDVHEVR.[K]	1xBiotin [K1]	3	1	P14618	P14618 [247-255]	P14618 1xBiotin [K247]	Pyruvate kinase PKM [OS=Homo sapiens]	1	1266.63	5835.48	3221.54	3423.19	24060.2	15465.3	12708.2	NoTM	outside	Cytoplasm;Nucleus;Nuclear translocation is sufficient to induce cell death that is caspase independent, isoform-specific and independent of its enzymatic activity	PKM	4.18532	2.06534	0.0196986	1.70557	138	0.091213	1.03994
[R].LPLQDVYKIGGIGTVPVGR.[V]	1xBiotin [K8]	4	4	P68104	P68104 [248-266]	P68104 1xBiotin [K255]	Elongation factor 1-alpha 1 [OS=Homo sapiens]	1	2208.22	4513.39	12065.9	11884.3	23169.4	22747.3	17394.9	NoTM	outside	Cytoplasm;Nucleus;Nucleus, nucleolus;Cell membrane;Translocates together with ZPR1 from the cytoplasm to the nucleus and nucleolus after treatment with mitogens (PubMed:8650580);Localization at the cell membrane depends on EEF1A1 phosphorylation status and the presence of PPP1R16B (PubMed:26497934)	EEF1A1	2.22431	1.15336	0.0201091	1.69661	139	0.092444	1.03412
[K].LGLKSLVSK.[G]	1xBiotin [K4]	5	4	P10412; P16403	P10412 [82-90]; P16403 [82-90]	P10412 1xBiotin [K85]; P16403 1xBiotin [K85]	Histone H1.4 [OS=Homo sapiens] Histone H1.2 [OS=Homo sapiens]	1	1170.69	2452.05	5147.96	2681.31	76140.6	43372.8	34003.7	NoTM	outside	Nucleus;Chromosome;Dysplays a punctuate staining pattern in the nucleus	HIST1H1E	14.9317	3.9003	0.0203098	1.69229	140	0.0926999	1.03292
[K].ASGPPVSELITKAVAASK.[E]	1xBiotin [K12]	3	8	P10412; P16403	P10412 [35-52]; P16403 [35-52]	P10412 1xBiotin [K46]; P16403 1xBiotin [K46]	Histone H1.4 [OS=Homo sapiens] Histone H1.2 [OS=Homo sapiens]	1	1952.05	5651.62	5862.45	5058.49	42908.1	31266.6	19091.6	NoTM	outside	Nucleus;Chromosome;Dysplays a punctuate staining pattern in the nucleus	HIST1H1E	5.62775	2.49256	0.0205502	1.68718	141	0.0931317	1.0309
[K].LDVQFSGLTKGDAVR.[D]	1xBiotin [K10]	2	9	P21333	P21333 [907-921]	P21333 1xBiotin [K916]	Filamin-A [OS=Homo sapiens]	1	1831.94	106116	77983.4	78723.8	56546.8	48679.7	51792.4	NoTM	outside	Cytoplasm, cell cortex;Cytoplasm, cytoskeleton;Perikaryon;Cell projection, growth cone;Following SEMA3A stimulation of DRG neurons, colocalizes with F-actin (By similarity)	FLNA	0.597432	-0.743153	0.0208573	1.68074	142	0.0938579	1.02753
[K].EKYIDQEELNK.[T]	1xBiotin [K2]	5	3	P07900; P08238	P07900 [282-292]; P08238 [274-284]	P07900 1xBiotin [K283]; P08238 1xBiotin [K275]	Heat shock protein HSP 90-alpha [OS=Homo sapiens] Heat shock protein HSP 90-beta [OS=Homo sapiens]	1	1634.77	3646.3	2644.2	4203.24	61633.5	31239.8	30679.4	NoTM	outside	Nucleus;Cytoplasm;Melanosome;Cell membrane	HSP90AA1	11.7739	3.55753	0.0211722	1.67423	143	0.0946085	1.02407
[K].IKVLGSGAFGTVYK.[G]	1xBiotin [K2]	1	2	P00533-1	P00533-1 [715-728]	P00533-1 1xBiotin [K716]	epidermal growth factor receptor [OS=Homo sapiens]	1	1665.9	2332.83	3318.83	2381.91	17769.4	10144.6	9502.77	HasTM	inside	Cell membrane;Endoplasmic reticulum membrane ;Single-pass type I membrane protein;Golgi apparatus membrane;Single-pass type I membrane protein;Nucleus membrane;Single-pass type I membrane protein;Endosome;Endosome membrane;Nucleus;Endocytosed upon activation by ligand (PubMed:2790960, PubMed:17182860, PubMed:27153536);Colocalized with GPER1 in the nucleus of estrogen agonist-induced cancer-associ…	EGFR	4.65755	2.21957	0.0215358	1.66684	144	0.095565	1.0197
[R].IMKAQALR.[D]	1xBiotin [K3]; 1xOxidation [M2]	4	4	P07900; P08238	P07900 [613-620]; P08238 [605-612]	P07900 1xBiotin [K615]; P08238 1xBiotin [K607]	Heat shock protein HSP 90-alpha [OS=Homo sapiens] Heat shock protein HSP 90-beta [OS=Homo sapiens]	1	1172.63	10801.5	14362.4	5107.11	56960.3	47697.2	26874.3	NoTM	outside	Nucleus;Cytoplasm;Melanosome;Cell membrane	HSP90AA1	4.34514	2.1194	0.0221373	1.65488	145	0.0975567	1.01074
[K].SLVSKGTLVQTK.[G]	1xBiotin [K5]	5	4	P10412; P16403	P10412 [86-97]; P16403 [86-97]	P10412 1xBiotin [K90]; P16403 1xBiotin [K90]	Histone H1.4 [OS=Homo sapiens] Histone H1.2 [OS=Homo sapiens]	1	1486.83	2416.17	5103.5	5455.29	101600	61152.2	41931	NoTM	outside	Nucleus;Chromosome;Dysplays a punctuate staining pattern in the nucleus	HIST1H1E	15.7752	3.97959	0.0221866	1.65391	146	0.0971044	1.01276
[K].VPKTAENFR.[A]	1xBiotin [K3]	1	2	P62937	P62937 [29-37]	P62937 1xBiotin [K31]	peptidyl-prolyl cis-trans isomerase A [OS=Homo sapiens]	1	1287.65	2344.83	4458.98	9042.97	43586.7	29656.3	19922.2	NoTM	outside	Cytoplasm;Secreted	PPIA	5.87913	2.5556	0.0226243	1.64543	147	0.0983464	1.00724
[K].LFDSTTLEHQKTFR.[T]	1xBiotin [K11]	1	3	Q13347	Q13347 [214-227]	Q13347 1xBiotin [K224]	Eukaryotic translation initiation factor 3 subunit I [OS=Homo sapiens]	1	1948.96	95639	68713.1	54776.5	34604	25471.3	25727.9	NoTM	outside	Cytoplasm	EIF3I	0.391565	-1.35268	0.0228655	1.64082	148	0.0987233	1.00558
[R].GLVGEIIKR.[F]	1xBiotin [K8]	4	1	P15531	P15531 [19-27]	P15531 1xBiotin [K26]	Nucleoside diphosphate kinase A [OS=Homo sapiens]	1	1210.7	3908.37	3984.04	2144.54	20837.3	12161.9	11039.2	NoTM	outside	Cytoplasm;Nucleus	NME1	4.38763	2.13344	0.022884	1.64047	149	0.0981399	1.00815
[K].KLVWVPSDK.[S]	1xBiotin [K1]	1	7	P35579-1	P35579-1 [30-38]	P35579-1 1xBiotin [K30]	Myosin-9 [OS=Homo sapiens]	1	1297.7	78483.2	52980.3	62154	41572.7	34200.3	31098.8	NoTM	outside	Cytoplasm, cytoskeleton;Cytoplasm, cell cortex;In retinal pigment epithelial cells, predominantly localized to stress fiber-like structures with some localization to cytoplasmic puncta (PubMed:27331610)	MYH9	0.551974	-0.857328	0.0231875	1.63475	150	0.0987788	1.00534
[K].LDSGKELHINLIPNK.[Q]	1xBiotin [K5]	3	2	P07900	P07900 [70-84]	P07900 1xBiotin [K74]	Heat shock protein HSP 90-alpha [OS=Homo sapiens]	1	1917.03	5870.01	2808.26	3327.8	26553.7	17247.9	12821.7	NoTM	outside	Nucleus;Cytoplasm;Melanosome;Cell membrane	HSP90AA1	4.71622	2.23763	0.0231934	1.63464	151	0.0981495	1.00811
[K].KSDVEAIFSK.[Y]	1xBiotin [K1]	6	2	P07910-1	P07910-1 [30-39]	P07910-1 1xBiotin [K30]	Heterogeneous nuclear ribonucleoproteins C1/C2 [OS=Homo sapiens]	1	1349.68	3932.78	4187.1	5778.46	14097.1	9356.12	9048.63	NoTM	outside	Nucleus	HNRNPC	2.33854	1.22561	0.023205	1.63442	152	0.0975527	1.01076
[R].LSKEEIER.[M]	1xBiotin [K3]	3	5	P0DMV8	P0DMV8 [510-517]	P0DMV8 1xBiotin [K512]	heat shock 70 kDa protein 1A [OS=Homo sapiens]	1	1229.62	26980.6	24079.4	23814.1	246273	158644	106492	NoTM	outside	Cytoplasm;Nucleus;Cytoplasm, cytoskeleton, microtubule organizing center, centrosome	HSPA1A	6.83026	2.77194	0.0234407	1.63003	153	0.0978994	1.00922
[-].MSSGNAKIGHPAPNFK.[A]	1xBiotin [K7]; 1xMet-loss+Acetyl [N-Term]	1	6	Q06830	Q06830 [1-16]	Q06830 1xBiotin [K7]; 1xMet-loss+Acetyl [N-Term]	peroxiredoxin-1 [OS=Homo sapiens]	1	1792.88	4621.06	5096.85	7370.78	109524	61906.1	47122.5	NoTM	outside	Cytoplasm;Melanosome	PRDX1	12.7893	3.67687	0.0235148	1.62866	154	0.0975711	1.01068
[K].GTLVQTKGTGASGSFK.[L]	1xBiotin [K7]	5	4	P10412; P16403	P10412 [91-106]; P16403 [91-106]	P10412 1xBiotin [K97]; P16403 1xBiotin [K97]	Histone H1.4 [OS=Homo sapiens] Histone H1.2 [OS=Homo sapiens]	1	1764.89	4435.97	7949.23	5299.4	89506.9	49204.8	40538.6	NoTM	outside	Nucleus;Chromosome;Dysplays a punctuate staining pattern in the nucleus	HIST1H1E	10.136	3.34141	0.023568	1.62768	155	0.097161	1.01251
[R].KTVGVEPAADGK.[G]	1xBiotin [K1]	5	2	P46779	P46779 [47-58]	P46779 1xBiotin [K47]	60S ribosomal protein L28 [OS=Homo sapiens]	1	1397.71	3249.16	2047.28	3215.3	30837.4	21776.1	12500.3	NoTM	outside	NO_DATA	RPL28	7.64988	2.93544	0.0237068	1.62513	156	0.0971067	1.01275
[R].NVLVKTPQHVK.[I]	1xBiotin [K5]	1	2	P00533-1	P00533-1 [842-852]	P00533-1 1xBiotin [K846]	epidermal growth factor receptor [OS=Homo sapiens]	1	1488.84	4078.46	6098.91	2417.24	43206	25066.2	19997.5	HasTM	outside	Cell membrane;Endoplasmic reticulum membrane ;Single-pass type I membrane protein;Golgi apparatus membrane;Single-pass type I membrane protein;Nucleus membrane;Single-pass type I membrane protein;Endosome;Endosome membrane;Nucleus;Endocytosed upon activation by ligand (PubMed:2790960, PubMed:17182860, PubMed:27153536);Colocalized with GPER1 in the nucleus of estrogen agonist-induced cancer-associ…	EGFR	7.00853	2.80911	0.0240053	1.61969	157	0.097703	1.01009
[K].VTQQGLKMVVPGLDGAQIPR.[D]	1xBiotin [K7]; 1xOxidation [M8]	1	5	P49327	P49327 [1152-1171]	P49327 1xBiotin [K1158]	Fatty acid synthase [OS=Homo sapiens]	1	2349.24	27872.7	32968	19511.9	9009.3	14295.6	12455.4	NoTM	outside	Cytoplasm;Melanosome	FASN	0.445042	-1.16799	0.0243492	1.61351	158	0.0984757	1.00667
[K].KAEVEGK.[D]	1xBiotin [K1]	2	2	Q00839	Q00839 [620-626]	Q00839 1xBiotin [K620]	Heterogeneous nuclear ribonucleoprotein U [OS=Homo sapiens]	1	986.498	4778.45	5165.18	5622.67	15388.2	11563.5	8840.78	NoTM	outside	Nucleus;Nucleus matrix;Chromosome;Nucleus speckle;Cytoplasm, cytoskeleton, microtubule organizing center, centrosome;Chromosome, centromere, kinetochore;Cytoplasm, cytoskeleton, spindle;Cytoplasm, cytoskeleton, spindle pole;Midbody;Cytoplasm;Cell surface;Cytoplasmic granule;Localizes in the nucleus during interphase (PubMed:21242313);At metaphase, localizes with mitotic spindle microtubules (MTs)…	HNRNPU	2.29936	1.20123	0.0244194	1.61227	159	0.0981383	1.00816
[R].YVQKGEYR.[T]	1xBiotin [K4]	17	2	P16070	P16070 [155-162]	P16070 1xBiotin [K158]	CD44 antigen [OS=Homo sapiens]	1	1268.61	5254.12	3620.66	5788.05	16474.3	15203.5	8844.65	HasTM	outside	Cell membrane;Cell projection, microvillus;Co-localizes with RDX, EZR and MSN in microvilli;Localizes to cholesterol-rich membrane-bound lipid raft domains	CD44	2.76362	1.46656	0.0244395	1.61191	160	0.0976051	1.01053
[R].DPNTKR.[S]	1xBiotin [K5]	4	2	P09651-1	P09651-1 [48-53]	P09651-1 1xBiotin [K52]	Heterogeneous nuclear ribonucleoprotein A1 [OS=Homo sapiens]	1	956.462	4277.56	2780.56	5656.63	16181	15795.6	8478.38	NoTM	outside	Nucleus;Cytoplasm;Shuttles continuously between the nucleus and the cytoplasm along with mRNA;Component of ribonucleosomes (PubMed:17289661);Cytoplasm;Cytoplasm	HNRNPA1	3.18174	1.66981	0.0248332	1.60497	161	0.0985615	1.00629
[R].LVNHFVEEFKR.[K]	1xBiotin [K10]	2	9	P0DMV8	P0DMV8 [237-247]	P0DMV8 1xBiotin [K246]	heat shock 70 kDa protein 1A [OS=Homo sapiens]	1	1643.84	48135.9	41230.4	11377.9	449922	252501	201878	NoTM	outside	Cytoplasm;Nucleus;Cytoplasm, cytoskeleton, microtubule organizing center, centrosome	HSPA1A	8.9762	3.16611	0.0248712	1.6043	162	0.098103	1.00832
[K].LQALKDTANR.[L]	1xBiotin [K5]	2	3	P29401	P29401 [12-21]	P29401 1xBiotin [K16]	Transketolase [OS=Homo sapiens]	1	1355.71	23374	15175.9	13146.1	7607.64	2807.77	5418.96	NoTM	outside	NO_DATA	TKT	0.306298	-1.70699	0.0250126	1.60184	163	0.0980555	1.00853
[K].VLKQVHPDTGISSK.[A]	1xBiotin [K3]	16	14	Q16778; P58876; Q93079	Q16778 [45-58]; P58876 [45-58]; Q93079 [45-58]	Q16778 1xBiotin [K47]; P58876 1xBiotin [K47]; Q93079 1xBiotin [K47]	Histone H2B type 2-E [OS=Homo sapiens] Histone H2B type 1-D [OS=Homo sapiens] Histone H2B type 1-H [OS=Homo sapiens]	1	1734.92	60617.3	58896.7	46965.2	898237	570015	352210	NoTM	outside	Nucleus;Chromosome	HIST2H2BE	10.9351	3.45089	0.0255171	1.59317	164	0.0994234	1.00251
[R].KASGPPVSELITK.[A]	1xBiotin [K1]	3	7	P10412; P16403	P10412 [34-46]; P16403 [34-46]	P10412 1xBiotin [K34]; P16403 1xBiotin [K34]	Histone H1.4 [OS=Homo sapiens] Histone H1.2 [OS=Homo sapiens]	1	1552.84	3223.63	5414.81	4052.86	72731.1	42717.5	29761.3	NoTM	outside	Nucleus;Chromosome;Dysplays a punctuate staining pattern in the nucleus	HIST1H1E	11.4417	3.51623	0.0256598	1.59075	165	0.0993735	1.00273
[K].VTKSAQK.[A]	1xBiotin [K3]	4	4	P68104	P68104 [451-457]	P68104 1xBiotin [K453]	Elongation factor 1-alpha 1 [OS=Homo sapiens]	1	987.529	26042.6	10416.9	15837.1	69772.8	69715.2	36683	NoTM	outside	Cytoplasm;Nucleus;Nucleus, nucleolus;Cell membrane;Translocates together with ZPR1 from the cytoplasm to the nucleus and nucleolus after treatment with mitogens (PubMed:8650580);Localization at the cell membrane depends on EEF1A1 phosphorylation status and the presence of PPP1R16B (PubMed:26497934)	EEF1A1	3.36869	1.75219	0.0258211	1.58803	166	0.0993957	1.00263
[K].TPKGPSSVEDIK.[A]	1xBiotin [K3]	3	3	P06748	P06748 [237-248]	P06748 1xBiotin [K239]	Nucleophosmin [OS=Homo sapiens]	1	1483.75	5668.59	5026	3437.29	59113.6	32854.7	26310.8	NoTM	outside	Nucleus, nucleolus;Nucleus, nucleoplasm;Cytoplasm, cytoskeleton, microtubule organizing center, centrosome;Has been found in the cytoplasm in patients with primary acute myelogenous leukemia (AML), but not with secondary AML;Can shuttle between cytoplasm and nucleus;Co- localizes with the methylated form of RPS10 in the granular component (GC) region of the nucleolus;Colocalized with nucleolin an…	NPM1	8.36967	3.06517	0.0259129	1.58648	167	0.0991517	1.0037
[R].LKVGLQVVAVK.[A]	1xBiotin [K2]	1	4	P10809	P10809 [291-301]	P10809 1xBiotin [K292]	60 kDa heat shock protein, mitochondrial [OS=Homo sapiens]	1	1379.84	3024.95	5292.31	2576.51	23820.1	17569.4	10404.4	NoTM	outside	Mitochondrion matrix	HSPD1	4.75446	2.24928	0.0263499	1.57922	168	0.100224	0.999029
[K].VQVSYKGETK.[A]	1xBiotin [K6]	1	4	P0DMV8	P0DMV8 [103-112]	P0DMV8 1xBiotin [K108]	heat shock 70 kDa protein 1A [OS=Homo sapiens]	1	1364.69	52291.5	33929	37444.2	293453	235228	120570	NoTM	outside	Cytoplasm;Nucleus;Cytoplasm, cytoskeleton, microtubule organizing center, centrosome	HSPA1A	5.2501	2.39234	0.0265665	1.57566	169	0.10045	0.998051
[R].IGAEVYHNLKNVIK.[E]	1xBiotin [K10]	2	2	P06733-1	P06733-1 [184-197]	P06733-1 1xBiotin [K193]	alpha-enolase [OS=Homo sapiens]	1	1823.98	4765.86	3921.24	2523.56	18704.2	10874.7	10269.1	NoTM	outside	Cytoplasm;Cell membrane;Cytoplasm, myofibril, sarcomere, M line;ENO1 is localized to the M line;[Isoform MBP-1]: Nucleus;[Isoform MBP-1]: Nucleus	ENO1	3.55448	1.82964	0.0268645	1.57082	170	0.100979	0.995769
[-].MSILKIHAR.[E]	1xBiotin [K5]; 1xMet-loss+Acetyl [N-Term]	1	5	P06733-1	P06733-1 [1-9]	P06733-1 1xBiotin [K5]; 1xMet-loss+Acetyl [N-Term]	alpha-enolase [OS=Homo sapiens]	1	1205.68	2147.45	2815.9	3679.82	295103	145145	122248	NoTM	outside	Cytoplasm;Cell membrane;Cytoplasm, myofibril, sarcomere, M line;ENO1 is localized to the M line;[Isoform MBP-1]: Nucleus;[Isoform MBP-1]: Nucleus	ENO1	65.0798	6.02414	0.0271348	1.56647	171	0.101398	0.993969
[R].QTVAVGVIKAVDK.[K]	1xBiotin [K9]	3	2	P68104	P68104 [431-443]	P68104 1xBiotin [K439]	Elongation factor 1-alpha 1 [OS=Homo sapiens]	1	1553.87	5213.47	5118.33	5534.79	21228.6	10997	14132.2	NoTM	outside	Cytoplasm;Nucleus;Nucleus, nucleolus;Cell membrane;Translocates together with ZPR1 from the cytoplasm to the nucleus and nucleolus after treatment with mitogens (PubMed:8650580);Localization at the cell membrane depends on EEF1A1 phosphorylation status and the presence of PPP1R16B (PubMed:26497934)	EEF1A1	2.92172	1.54682	0.0284272	1.54627	172	0.10561	0.976293
[R].AKHHAISAK.[L]	1xBiotin [K2]	3	2	P27824	P27824 [126-134]	P27824 1xBiotin [K127]	Calnexin [OS=Homo sapiens]	1	1188.63	2559.16	3711.91	5100.1	36834.6	25853.1	14127	HasTM	outside	Endoplasmic reticulum membrane;Endoplasmic reticulum;Melanosome;The palmitoylated form preferentially localizes to the perinuclear rough ER (PubMed:22314232)	CANX	6.75521	2.756	0.02975	1.52651	173	0.109886	0.959059
[R].STLNEIYFGKTK.[D]	1xBiotin [K10]	2	4	P47756-1	P47756-1 [226-237]	P47756-1 1xBiotin [K235]	F-actin-capping protein subunit beta [OS=Homo sapiens]	1	1626.82	25999.4	12887.4	24419.6	9625.97	5631.42	2833.06	NoTM	outside	Cytoplasm, cytoskeleton;Cytoplasm, myofibril, sarcomere	CAPZB	0.28576	-1.80712	0.0301632	1.52052	174	0.110772	0.955571
[K].EFEGKTLVSVTK.[E]	1xBiotin [K5]	3	3	P07900	P07900 [535-546]	P07900 1xBiotin [K539]	Heat shock protein HSP 90-alpha [OS=Homo sapiens]	1	1563.81	3377.36	2007.43	4268.22	25282.5	18222.9	10049.2	NoTM	outside	Nucleus;Cytoplasm;Melanosome;Cell membrane	HSP90AA1	5.54797	2.47196	0.0302627	1.51909	175	0.110502	0.956629
[K].AKIQDK.[E]	1xBiotin [K2]	4	3	P62987	P62987 [28-33]	P62987 1xBiotin [K29]	Ubiquitin-60S ribosomal protein L40 [OS=Homo sapiens]	1	928.492	4297.09	10518	9468.93	134072	85419.5	48827.8	NoTM	outside	[Ubiquitin]: Cytoplasm;Nucleus;[60S ribosomal protein L40]: Cytoplasm;[60S ribosomal protein L40]: Cytoplasm	UBA52	11.0492	3.46587	0.0303656	1.51762	176	0.110248	0.95763
[K].IKIIAPPER.[K]	1xBiotin [K2]	8	8	P60709	P60709 [327-335]	P60709 1xBiotin [K328]	Actin, cytoplasmic 1 [OS=Homo sapiens]	1	1262.73	66046.3	46542	65832.6	232829	157248	120421	NoTM	outside	Cytoplasm, cytoskeleton;Nucleus	ACTB	2.8612	1.51662	0.0304013	1.51711	177	0.109754	0.95958
[K].KEMQPTHPIR.[L]	1xBiotin [K1]; 1xOxidation [M3]	5	2	P63104-1; P27348	P63104-1 [158-167]; P27348 [158-167]	P63104-1 1xBiotin [K158]; P27348 1xBiotin [K158]	14-3-3 protein zeta/delta [OS=Homo sapiens] 14-3-3 protein theta [OS=Homo sapiens]	1	1478.72	3377.93	3663	5324.09	15377.4	15642.8	7690.5	NoTM	outside	Cytoplasm;Melanosome	YWHAZ	3.13066	1.64647	0.0304982	1.51573	178	0.109485	0.960644
[K].TAIGKAGYTDK.[V]	1xBiotin [K5]	2	4	P06733-1	P06733-1 [229-239]	P06733-1 1xBiotin [K233]	alpha-enolase [OS=Homo sapiens]	1	1350.67	4119.96	4234.32	4345.19	73073.2	46806.7	26199	NoTM	outside	Cytoplasm;Cell membrane;Cytoplasm, myofibril, sarcomere, M line;ENO1 is localized to the M line;[Isoform MBP-1]: Nucleus;[Isoform MBP-1]: Nucleus	ENO1	11.5028	3.52391	0.0305672	1.51474	179	0.10912	0.962097
[K].ANKITITNDK.[G]	1xBiotin [K3]	3	8	P0DMV8	P0DMV8 [498-507]	P0DMV8 1xBiotin [K500]	heat shock 70 kDa protein 1A [OS=Homo sapiens]	1	1343.7	34916.9	31918.9	31253.8	368507	207063	154773	NoTM	outside	Cytoplasm;Nucleus;Cytoplasm, cytoskeleton, microtubule organizing center, centrosome	HSPA1A	7.44568	2.8964	0.0306214	1.51397	180	0.108706	0.963746
[R].KFSAPR.[H]	1xBiotin [K1]	2	2	P39023	P39023 [5-10]	P39023 1xBiotin [K5]	60S ribosomal protein L3 [OS=Homo sapiens]	1	931.482	3511.65	3476.73	2609.09	79420.6	45693.3	29327.3	NoTM	outside	Nucleus, nucleolus;Cytoplasm	RPL3	16.0919	4.00826	0.0306954	1.51293	181	0.108367	0.965105
[K].LLQKGIHPTIISESFQK.[A]	1xBiotin [K4]	2	4	P50991	P50991 [123-139]	P50991 1xBiotin [K126]	T-complex protein 1 subunit delta [OS=Homo sapiens]	1	2165.18	44591.8	38825.8	34045.9	30795.7	21973.5	19221.6	NoTM	outside	Cytoplasm;Melanosome;Cytoplasm, cytoskeleton, microtubule organizing center, centrosome;Cytoplasm, cytoskeleton, cilium basal body	CCT4	0.612878	-0.706329	0.0307793	1.51174	182	0.108066	0.966311
[K].HEKFSEVLK.[R]	1xBiotin [K3]	1	1	P12277	P12277 [305-313]	P12277 1xBiotin [K307]	Creatine kinase B-type [OS=Homo sapiens]	1	1342.68	5756.09	2687.87	3449.36	21432.8	14608.8	9898.86	NoTM	outside	Cytoplasm	CKB	3.86271	1.94961	0.0308499	1.51075	183	0.107722	0.967696
[K].ADLINNLGTIAKSGTK.[A]	1xBiotin [K]	4	4	P07900; P08238	P07900 [101-116]; P08238 [96-111]	P07900 1xBiotin [K]; P08238 1xBiotin [K]	Heat shock protein HSP 90-alpha [OS=Homo sapiens] Heat shock protein HSP 90-beta [OS=Homo sapiens]	1	1841.98	4759.69	5193.45	4114.38	39659	25493.3	16097.5	NoTM	outside	Nucleus;Cytoplasm;Melanosome;Cell membrane	HSP90AA1	5.7757	2.53	0.0308828	1.51028	184	0.107251	0.969601
[R].INFDKYHPGYFGK.[V]	1xBiotin [K5]	1	2	P46776	P46776 [43-55]	P46776 1xBiotin [K47]	60S ribosomal protein L27a [OS=Homo sapiens]	1	1811.86	3380.2	5773.84	3326.83	26174.2	18698.5	11041.1	NoTM	inside	NO_DATA	RPL27A	4.47997	2.16349	0.031114	1.50704	185	0.10747	0.968714
[-].MVKQIESK.[T]	1xBiotin [K3]; 1xMet-loss [N-Term]	2	1	P10599-1	P10599-1 [1-8]	P10599-1 1xBiotin [K3]; 1xMet-loss [N-Term]	thioredoxin [OS=Homo sapiens]	1	1057.57	3689.9	2872.5	4428.05	43232.2	27621.5	16341.5	NoTM	inside	Nucleus;Cytoplasm;Secreted;Predominantly in the cytoplasm in non irradiated cells (PubMed:11118054);Radiation induces translocation of TRX from the cytoplasm to the nucleus (PubMed:11118054);Secreted by a leaderless secretory pathway (PubMed:1332947)	TXN	7.93371	2.988	0.0312923	1.50456	186	0.107504	0.968574
[RK].DAFPVAGQKLIYAGK.[I]	1xBiotin [K9]	4	1	P54725-1	P54725-1 [39-53]	P54725-1 1xBiotin [K47]	UV excision repair protein RAD23 homolog A [OS=Homo sapiens]	1	1803.95	5446.39	3743.02	3365.21	8584.22	7589.88	5997.04	NoTM	outside	Nucleus	RAD23A	1.76597	0.820464	0.031608	1.5002	187	0.108008	0.966544
[R].ILLQSKNAGAVIGK.[G]	1xBiotin [K6]	3	6	P61978	P61978 [47-60]	P61978 1xBiotin [K52]	Heterogeneous nuclear ribonucleoprotein K [OS=Homo sapiens]	1	1637.94	77760.7	53900.9	49807.7	37220.7	27032.8	23189.1	NoTM	outside	Cytoplasm;Nucleus, nucleoplasm;Cell projection, podosome;In case of ASFV infection, there is a shift in the localization which becomes predominantly nuclear (PubMed:18775702)	HNRNPK	0.481859	-1.05332	0.03163	1.4999	188	0.107508	0.968558
[K].IISKIENHEGVR.[R]	1xBiotin [K4]	3	1	P14618	P14618 [267-278]	P14618 1xBiotin [K270]	Pyruvate kinase PKM [OS=Homo sapiens]	1	1620.85	5058.76	5679.06	5681.55	22530.5	14560.3	11407.7	NoTM	outside	Cytoplasm;Nucleus;Nuclear translocation is sufficient to induce cell death that is caspase independent, isoform-specific and independent of its enzymatic activity	PKM	2.95374	1.56254	0.0321447	1.49289	189	0.10868	0.963852
[R].KVGALESK.[L]	1xBiotin [K1]	5	1	Q9NXR1-1	Q9NXR1-1 [263-270]	Q9NXR1-1 1xBiotin [K263]	Nuclear distribution protein nudE homolog 1 [OS=Homo sapiens]	1	1057.57	4301.92	2885.67	4444.07	43232.2	27621.5	16341.5	NoTM	outside	Cytoplasm, cytoskeleton;Cytoplasm, cytoskeleton, microtubule organizing center, centrosome;Chromosome, centromere, kinetochore;Cytoplasm, cytoskeleton, spindle;Cleavage furrow;During mitosis, partially associated with the mitotic spindle;Concentrates at the plus ends of microtubules coincident with kinetochores in metaphase and anaphase in a CENPF-dependent manner;Also localizes to the cleavage f…	NDE1	7.49636	2.90619	0.0321508	1.49281	190	0.108128	0.966061
[K].SGFNSKSGQR.[G]	1xBiotin [K6]	3	3	P07910-1	P07910-1 [171-180]	P07910-1 1xBiotin [K176]	Heterogeneous nuclear ribonucleoproteins C1/C2 [OS=Homo sapiens]	1	1293.6	4671.69	7644.15	2974.76	32585.6	22400.8	13948	NoTM	outside	Nucleus	HNRNPC	4.50829	2.17258	0.0323674	1.48989	191	0.108287	0.965425
[K].ADKDYHFK.[V]	1xBiotin [K3]	3	2	P06748	P06748 [25-32]	P06748 1xBiotin [K27]	Nucleophosmin [OS=Homo sapiens]	1	1249.57	11171.2	2356.93	6994.34	76186.1	48477.9	29280.9	NoTM	outside	Nucleus, nucleolus;Nucleus, nucleoplasm;Cytoplasm, cytoskeleton, microtubule organizing center, centrosome;Has been found in the cytoplasm in patients with primary acute myelogenous leukemia (AML), but not with secondary AML;Can shuttle between cytoplasm and nucleus;Co- localizes with the methylated form of RPS10 in the granular component (GC) region of the nucleolus;Colocalized with nucleolin an…	NPM1	7.50127	2.90714	0.0325569	1.48736	192	0.108353	0.965158
[K].ISKGANPVEIR.[R]	1xBiotin [K3]	2	9	P10809	P10809 [131-141]	P10809 1xBiotin [K133]	60 kDa heat shock protein, mitochondrial [OS=Homo sapiens]	1	1409.76	87754.4	69866.3	73764	62365.5	54729	47216.5	NoTM	outside	Mitochondrion matrix	HSPD1	0.71012	-0.493864	0.0326993	1.48546	193	0.108263	0.965518
[K].AGAVEKGVPLYR.[H]	1xBiotin [K6]	2	5	P06733-1	P06733-1 [121-132]	P06733-1 1xBiotin [K126]	alpha-enolase [OS=Homo sapiens]	1	1485.79	3507.29	2587.44	2107.78	87341.6	44771.3	33332.4	NoTM	outside	Cytoplasm;Cell membrane;Cytoplasm, myofibril, sarcomere, M line;ENO1 is localized to the M line;[Isoform MBP-1]: Nucleus;[Isoform MBP-1]: Nucleus	ENO1	20.1701	4.33414	0.0332538	1.47816	194	0.109532	0.96046
[R].HLYTKDIDIHEVR.[I]	1xBiotin [K5]	2	1	Q00839	Q00839 [348-360]	Q00839 1xBiotin [K352]	Heterogeneous nuclear ribonucleoprotein U [OS=Homo sapiens]	1	1864.94	3710.09	2108.27	4313.38	15610.1	7359.59	10708.5	NoTM	outside	Nucleus;Nucleus matrix;Chromosome;Nucleus speckle;Cytoplasm, cytoskeleton, microtubule organizing center, centrosome;Chromosome, centromere, kinetochore;Cytoplasm, cytoskeleton, spindle;Cytoplasm, cytoskeleton, spindle pole;Midbody;Cytoplasm;Cell surface;Cytoplasmic granule;Localizes in the nucleus during interphase (PubMed:21242313);At metaphase, localizes with mitotic spindle microtubules (MTs)…	HNRNPU	3.32403	1.73293	0.0342106	1.46584	195	0.112105	0.950374
[K].KQGGLGPMNIPLVSDPK.[R]	1xBiotin [K1]	1	1	Q06830	Q06830 [93-109]	Q06830 1xBiotin [K93]	peroxiredoxin-1 [OS=Homo sapiens]	1	1977.03	3218.54	4219.87	2608.39	8061.91	5452.93	5601.01	NoTM	outside	Cytoplasm;Melanosome	PRDX1	1.90268	0.928033	0.0353942	1.45107	196	0.115392	0.937824
[K].VAQGVSGAVQDKGSIHK.[F]	1xBiotin [K]	1	2	P12268	P12268 [439-455]	P12268 1xBiotin [K]	inosine-5'-monophosphate dehydrogenase 2 [OS=Homo sapiens]	1	1906.98	2615.46	2318.29	2334.09	7430.24	5090.87	4052.72	NoTM	outside	Cytoplasm;Nucleus	IMPDH2	2.28044	1.18931	0.0365311	1.43734	197	0.118494	0.926302
[K].ILKVIR.[K]	1xBiotin [K3]	3	3	P07900; P08238	P07900 [408-413]; P08238 [400-405]	P07900 1xBiotin [K410]; P08238 1xBiotin [K402]	Heat shock protein HSP 90-alpha [OS=Homo sapiens] Heat shock protein HSP 90-beta [OS=Homo sapiens]	1	967.612	41590.1	2841.48	34493.6	141608	98199.2	67326.5	NoTM	outside	Nucleus;Cytoplasm;Melanosome;Cell membrane	HSP90AA1	3.89145	1.96031	0.0365745	1.43682	198	0.118036	0.927986
[K].AVAASKER.[NS]	1xBiotin [K6]	4	2	P10412; P16403	P10412 [47-54]; P16403 [47-54]	P10412 1xBiotin [K52]; P16403 1xBiotin [K52]	Histone H1.4 [OS=Homo sapiens] Histone H1.2 [OS=Homo sapiens]	1	1057.55	29105.3	7992.33	13330.5	65691.9	63784.6	33625.6	NoTM	outside	Nucleus;Chromosome;Dysplays a punctuate staining pattern in the nucleus	HIST1H1E	3.23435	1.69348	0.0366833	1.43553	199	0.117792	0.928884
[-].MPDPAKSAPAPK.[K]	1xBiotin [K6]; 1xMet-loss [N-Term]	4	2	Q93079	Q93079 [1-12]	Q93079 1xBiotin [K6]; 1xMet-loss [N-Term]	Histone H2B type 1-H [OS=Homo sapiens]	1	1304.67	4436	2312.27	2612.19	18779.6	16287.7	7257.25	NoTM	outside	Nucleus;Chromosome	HIST1H2BH	4.52163	2.17684	0.0367763	1.43443	200	0.1175	0.929961
[K].NLKLGIHEDSTNR.[R]	1xBiotin [K3]	1	3	P08238	P08238 [436-448]	P08238 1xBiotin [K438]	Heat shock protein HSP 90-beta [OS=Homo sapiens]	1	1722.86	2149.65	2960.42	3688.54	78723.8	50457.3	24344.3	NoTM	outside	Cytoplasm;Melanosome;Nucleus;Secreted;Cell membrane;Translocates with BIRC2 from the nucleus to the cytoplasm during differentiation (PubMed:18239673);Secreted when associated with TGFB1 processed form (LAP) (PubMed:20599762)	HSP90AB1	17.4488	4.12506	0.0372525	1.42884	201	0.11843	0.926539
[K].VVKQASEGPLK.[G]	1xBiotin [K3]	2	3	P04406-1	P04406-1 [261-271]	P04406-1 1xBiotin [K263]	glyceraldehyde-3-phosphate dehydrogenase [OS=Homo sapiens]	1	1381.75	17029.1	22274.2	20999.1	75026.6	52382.5	36415.8	NoTM	outside	Cytoplasm, cytosol;Nucleus;Cytoplasm, perinuclear region;Membrane;Cytoplasm, cytoskeleton;Postnuclear and Perinuclear regions	GAPDH	2.71672	1.44186	0.0380107	1.42009	202	0.120242	0.919945
[R].LAKLSDGVAVLK.[V]	1xBiotin [K3]	1	5	P10809	P10809 [394-405]	P10809 1xBiotin [K396]	60 kDa heat shock protein, mitochondrial [OS=Homo sapiens]	1	1439.83	3210.76	2582.62	2933.71	36102.3	20953.7	13154.6	NoTM	outside	Mitochondrion matrix	HSPD1	8.04514	3.00812	0.0383611	1.41611	203	0.120752	0.918104
[R].KIFVGTK.[G]	1xBiotin [K1]	1	1	P62701	P62701 [128-134]	P62701 1xBiotin [K128]	40S ribosomal protein S4, X isoform [OS=Homo sapiens]	1	1018.58	3142.2	2279.54	4000.08	15969.6	10519.6	7005.54	NoTM	outside	Cytoplasm	RPS4X	3.55501	1.82985	0.0390567	1.4083	204	0.12234	0.912433
[K].DISLSDYKGK.[Y]	1xBiotin [K8]	1	2	Q06830	Q06830 [28-37]	Q06830 1xBiotin [K35]	peroxiredoxin-1 [OS=Homo sapiens]	1	1351.66	4505.27	2324.6	3647.69	23879.1	18888.4	8669.13	NoTM	outside	Cytoplasm;Melanosome	PRDX1	4.90921	2.29549	0.0391689	1.40706	205	0.122092	0.913311
[K].LDKSQIHDIVLVGGSTR.[I]	1xBiotin [K3]	2	11	P11142-1	P11142-1 [326-342]	P11142-1 1xBiotin [K328]	Heat shock cognate 71 kDa protein [OS=Homo sapiens]	1	2064.09	2301.99	14354	4495.46	72954.9	168631	71828.7	NoTM	outside	Cytoplasm;Melanosome;Nucleus, nucleolus;Cell membrane;Translocates rapidly from the cytoplasm to the nuclei, and especially to the nucleoli, upon heat shock	HSPA8	14.8176	3.88924	0.0392936	1.40568	206	0.121887	0.914044
[R].SGVSLAALKK.[A]	1xBiotin [K9]	3	4	P10412; P16403	P10412 [55-64]; P16403 [55-64]	P10412 1xBiotin [K63]; P16403 1xBiotin [K63]	Histone H1.4 [OS=Homo sapiens] Histone H1.2 [OS=Homo sapiens]	1	1199.68	13757.2	2594.25	2879.93	84595	57736.1	28138.9	NoTM	outside	Nucleus;Chromosome;Dysplays a punctuate staining pattern in the nucleus	HIST1H1E	8.86416	3.14798	0.039301	1.4056	207	0.12132	0.916066
[K].ELHINLIPNKQDR.[T]	1xBiotin [K10]	2	2	P07900	P07900 [75-87]	P07900 1xBiotin [K84]	Heat shock protein HSP 90-alpha [OS=Homo sapiens]	1	1815.95	3622.32	2378.09	2740.92	19751	10347.3	9145.37	NoTM	outside	Nucleus;Cytoplasm;Melanosome;Cell membrane	HSP90AA1	4.48944	2.16654	0.0393868	1.40465	208	0.121001	0.917212
[K].ITITNDKGR.[L]	1xBiotin [K7]	6	8	P11142-1; P0DMV8	P11142-1 [501-509]; P0DMV8 [501-509]	P11142-1 1xBiotin [K507]; P0DMV8 1xBiotin [K507]	Heat shock cognate 71 kDa protein [OS=Homo sapiens] heat shock 70 kDa protein 1A [OS=Homo sapiens]	1	1243.65	88699	46450.9	33801.8	297414	219799	125334	NoTM	outside	Cytoplasm;Melanosome;Nucleus, nucleolus;Cell membrane;Translocates rapidly from the cytoplasm to the nuclei, and especially to the nucleoli, upon heat shock	HSPA8	3.80314	1.92719	0.039557	1.40278	209	0.120942	0.917422
[R].QATKDAGVIAGLNVLR.[I]	1xBiotin [K4]	3	10	P0DMV8	P0DMV8 [156-171]	P0DMV8 1xBiotin [K159]	heat shock 70 kDa protein 1A [OS=Homo sapiens]	1	1852.01	3915.49	2178.31	12706.7	100463	57322.6	35436.8	NoTM	outside	Cytoplasm;Nucleus;Cytoplasm, cytoskeleton, microtubule organizing center, centrosome	HSPA1A	10.2775	3.36141	0.0399325	1.39867	210	0.121509	0.915392
[K].LLSISGKR.[S]	1xBiotin [K7]	3	1	P06748	P06748 [135-142]	P06748 1xBiotin [K141]	Nucleophosmin [OS=Homo sapiens]	1	1099.63	33318.2	18768.3	25794.2	88013.2	64532.1	44472.7	NoTM	outside	Nucleus, nucleolus;Nucleus, nucleoplasm;Cytoplasm, cytoskeleton, microtubule organizing center, centrosome;Has been found in the cytoplasm in patients with primary acute myelogenous leukemia (AML), but not with secondary AML;Can shuttle between cytoplasm and nucleus;Co- localizes with the methylated form of RPS10 in the granular component (GC) region of the nucleolus;Colocalized with nucleolin an…	NPM1	2.52974	1.33899	0.0401864	1.39592	211	0.121702	0.914703
[K].HVVFGKVK.[E]	1xBiotin [K6]	2	5	P62937	P62937 [126-133]	P62937 1xBiotin [K131]	peptidyl-prolyl cis-trans isomerase A [OS=Homo sapiens]	1	1139.64	22357.4	17186	19905.9	54760.7	44336.7	28946.4	NoTM	outside	Cytoplasm;Secreted	PPIA	2.15383	1.1069	0.0403068	1.39462	212	0.121491	0.915457
[R].HQGVMVGMGQKDSYVGDEAQSK.[R]	1xBiotin [K11]; 1xOxidation [M]	6	7	P60709	P60709 [40-61]	P60709 1xBiotin [K50]	Actin, cytoplasmic 1 [OS=Homo sapiens]	1	2593.15	5537.82	5137.56	5558.74	62024.1	38695.1	20991.3	NoTM	outside	Cytoplasm, cytoskeleton;Nucleus	ACTB	7.4972	2.90635	0.0416059	1.38084	213	0.124818	0.903724
[K].IAKTHEDIEAQIR.[E]	1xBiotin [K3]	2	1	O75533-1	O75533-1 [4-16]	O75533-1 1xBiotin [K6]	splicing factor 3B subunit 1 [OS=Homo sapiens]	1	1749.9	3195.11	3256.51	4010.7	70518.4	41747.6	22366.6	NoTM	outside	Nucleus;Nucleus speckle	SF3B1	12.8683	3.68575	0.0416189	1.38071	214	0.124273	0.905623
[K].LKGDDLQAIK.[KQ]	1xBiotin [K2]	6	2	P07910-1	P07910-1 [188-197]	P07910-1 1xBiotin [K189]	Heterogeneous nuclear ribonucleoproteins C1/C2 [OS=Homo sapiens]	1	1326.71	2543.91	4258.75	3701.55	32992.6	19473.1	12149.5	NoTM	outside	Nucleus	HNRNPC	6.15136	2.62091	0.0422006	1.37468	215	0.125424	0.901619
[R].RPAVKQFHDSK.[I]	1xBiotin [K5]	1	1	Q02543	Q02543 [139-149]	Q02543 1xBiotin [K143]	60S ribosomal protein L18a [OS=Homo sapiens]	1	1538.79	3585.17	5861.7	2595.75	14179.5	9955.91	7362.8	NoTM	outside	NO_DATA	RPL18A	2.61556	1.38712	0.0425839	1.37075	216	0.125977	0.899707
[K].HKLDVTSVEDYK.[A]	1xBiotin [K2]	2	1	P48643	P48643 [264-275]	P48643 1xBiotin [K265]	T-complex protein 1 subunit epsilon [OS=Homo sapiens]	1	1659.8	4561.61	2037.03	4008.21	8979.27	6701.25	5702.61	NoTM	outside	Cytoplasm;Cytoplasm, cytoskeleton, microtubule organizing center, centrosome	CCT5	2.01597	1.01148	0.0438205	1.35832	217	0.129038	0.889282
[K].NIKLGIHEDSQNR.[K]	1xBiotin [K3]	2	5	P07900	P07900 [444-456]	P07900 1xBiotin [K446]	Heat shock protein HSP 90-alpha [OS=Homo sapiens]	1	1749.87	5501.71	3903.46	2667.94	88389.8	47247.6	29237.8	NoTM	outside	Nucleus;Cytoplasm;Melanosome;Cell membrane	HSP90AA1	13.6564	3.77151	0.0438358	1.35817	218	0.128491	0.891127
[K].AAVTPGKK.[A]	1xBiotin [K7]	1	2	P19338	P19338 [81-88]	P19338 1xBiotin [K87]	Nucleolin [OS=Homo sapiens]	1	997.55	4259.81	3557.68	2599.45	28533.4	17936.5	10181.5	NoTM	outside	Nucleus, nucleolus;Cytoplasm	NCL	5.43838	2.44318	0.0447549	1.34916	219	0.130586	0.884103
[K].LAEEIPLKILAHNGLVGR.[L]	1xBiotin [K8]	6	4	Q9Y6M1	Q9Y6M1 [271-288]	Q9Y6M1 1xBiotin [K278]	Insulin-like growth factor 2 mRNA-binding protein 2 [OS=Homo sapiens]	1	2169.22	17661	21769.1	38184.4	6384.71	9190.64	7387.68	NoTM	outside	Nucleus;Cytoplasm;Localizes at the connecting piece and the tail of the spermatozoa;In response to cellular stress, such as oxidative stress, recruited to stress granules	IGF2BP2	0.29586	-1.75701	0.0449664	1.34711	220	0.130607	0.884034
[R].AKEAQDDLVK.[T]	1xBiotin [K2]	1	1	P15311	P15311 [449-458]	P15311 1xBiotin [K450]	Ezrin [OS=Homo sapiens]	1	1342.67	4010.95	3956.65	2039.86	8351.93	6154.1	5242.89	NoTM	outside	Apical cell membrane;Cell projection;Cell projection, microvillus membrane;Cell projection, ruffle membrane;Cytoplasm, cell cortex;Cytoplasm, cytoskeleton;Cell projection, microvillus;Localizes to cell extensions and peripheral processes of astrocytes (By similarity);Microvillar peripheral membrane protein (cytoplasmic side)	EZR	1.97342	0.980698	0.0450335	1.34646	221	0.13021	0.885356
[K].ETQKSIYYITGESK.[E]	1xBiotin [K4]	1	3	P08238	P08238 [478-491]	P08238 1xBiotin [K481]	Heat shock protein HSP 90-beta [OS=Homo sapiens]	1	1872.9	4131.45	2200.93	2008.98	18009.1	10213	7626.7	NoTM	outside	Cytoplasm;Melanosome;Nucleus;Secreted;Cell membrane;Translocates with BIRC2 from the nucleus to the cytoplasm during differentiation (PubMed:18239673);Secreted when associated with TGFB1 processed form (LAP) (PubMed:20599762)	HSP90AB1	4.29772	2.10357	0.0453992	1.34295	222	0.130676	0.883804
[R].MQKEITALAPSTMK.[I]	1xBiotin [K3]; 1xOxidation [M]	7	4	P60709	P60709 [313-326]	P60709 1xBiotin [K315]	Actin, cytoplasmic 1 [OS=Homo sapiens]	1	1790.88	3234.39	3938.46	3628.05	19444.1	15524.3	7094.07	NoTM	outside	Cytoplasm, cytoskeleton;Nucleus	ACTB	3.89435	1.96138	0.0461365	1.33596	223	0.132203	0.87876
[K].TLTGKTITLEVEPSDTIENVK.[A]	1xBiotin [K5]	4	4	P62987	P62987 [7-27]	P62987 1xBiotin [K11]	Ubiquitin-60S ribosomal protein L40 [OS=Homo sapiens]	1	2514.3	2682.92	4392.48	4838.37	71684	43106.6	21344.2	NoTM	outside	[Ubiquitin]: Cytoplasm;Nucleus;[60S ribosomal protein L40]: Cytoplasm;[60S ribosomal protein L40]: Cytoplasm	UBA52	11.4267	3.51433	0.0469695	1.32818	224	0.133989	0.872931
[K].EGLELLKTAIGK.[A]	1xBiotin [K7]	2	4	P06733-1	P06733-1 [222-233]	P06733-1 1xBiotin [K228]	alpha-enolase [OS=Homo sapiens]	1	1497.83	4512.45	4553.89	5367.05	34355.2	19487.5	13291.3	NoTM	outside	Cytoplasm;Cell membrane;Cytoplasm, myofibril, sarcomere, M line;ENO1 is localized to the M line;[Isoform MBP-1]: Nucleus;[Isoform MBP-1]: Nucleus	ENO1	4.6513	2.21764	0.0484195	1.31498	225	0.137511	0.861661
[K].KGEDFVK.[T]	1xBiotin [K1]	2	1	P40926	P40926 [329-335]	P40926 1xBiotin [K329]	Malate dehydrogenase, mitochondrial [OS=Homo sapiens]	1	1048.51	2905.88	3383.22	2333.83	17033.7	13862.3	5851.73	NoTM	outside	Mitochondrion matrix	MDH2	4.26163	2.09141	0.0485124	1.31415	226	0.137165	0.862755
[K].DTYVMKIK.[V]	1xBiotin [K6]; 1xOxidation [M5]	2	1	Q9HC56	Q9HC56 [216-223]	Q9HC56 1xBiotin [K221]	Protocadherin-9 [OS=Homo sapiens]	1	1239.61	5669.6	4321.75	4399.03	7177.8	15708.8	12827.1	HasTM	outside	Cell membrane	PCDH9	2.48178	1.31137	0.049078	1.30911	227	0.138153	0.859638
[K].YTKDHTVR.[S]	1xBiotin [K3]	1	1	Q13263	Q13263 [186-193]	Q13263 1xBiotin [K188]	Transcription intermediary factor 1-beta [OS=Homo sapiens]	1	1245.6	4447.27	2488.8	4416.74	21357.3	14680.1	8016.77	NoTM	outside	Nucleus	TRIM28	3.88046	1.95623	0.0492476	1.30761	228	0.138023	0.860049
[R].SNDPKSQNHPGWLMR.[G]	1xBiotin [K5]	2	1	P06213-1	P06213-1 [567-581]	P06213-1 1xBiotin [K571]	insulin receptor [OS=Homo sapiens]	1	1992.92	4444.38	3785.61	4148.71	27356.1	14915.1	11145.7	HasTM	outside	Cell membrane;Late endosome;Lysosome;In the presence of SORL1, internalized INSR molecules are redirected back to the cell surface, thereby preventing their lysosomal catabolism and strengthening insulin signal reception	INSR	4.31523	2.10944	0.0492643	1.30747	229	0.137467	0.861802
[K].KAAVTPGK.[K]	1xBiotin [K1]	1	2	P19338	P19338 [80-87]	P19338 1xBiotin [K80]	Nucleolin [OS=Homo sapiens]	1	997.55	2046.81	4796.24	4881.74	28533.4	17936.5	10181.5	NoTM	outside	Nucleus, nucleolus;Cytoplasm	NCL	4.83175	2.27255	0.0501574	1.29967	230	0.13935	0.855892
[K].TAASAPANVSKGTTPLAPPPKPVR.[R]	1xBiotin [K11]	4	11	Q96D71	Q96D71 [681-704]	Q96D71 1xBiotin [K691]	RalBP1-associated Eps domain-containing protein 1 [OS=Homo sapiens]	1	2554.38	58514.8	36068.8	47450.9	33803.7	22978.9	24381.3	NoTM	outside	Membrane, clathrin-coated pit	REPS1	0.571438	-0.807331	0.0501767	1.2995	231	0.1388	0.857609
[R].TLLAKNLPYK.[V]	1xBiotin [K5]	1	3	P19338	P19338 [394-403]	P19338 1xBiotin [K398]	Nucleolin [OS=Homo sapiens]	1	1386.78	3750.69	5637.59	2172.37	36275.6	19455.4	13381.5	NoTM	outside	Nucleus, nucleolus;Cytoplasm	NCL	5.97825	2.57972	0.0502198	1.29913	232	0.138321	0.859112
[K].AVGKVIPELNGK.[L]	1xBiotin [K4]	2	6	P04406-1	P04406-1 [216-227]	P04406-1 1xBiotin [K219]	glyceraldehyde-3-phosphate dehydrogenase [OS=Homo sapiens]	1	1450.81	36832.7	35830.6	46403.1	32734.1	26341.7	21878.8	NoTM	outside	Cytoplasm, cytosol;Nucleus;Cytoplasm, perinuclear region;Membrane;Cytoplasm, cytoskeleton;Postnuclear and Perinuclear regions	GAPDH	0.679911	-0.556582	0.0511581	1.29109	233	0.1403	0.852941
[K].KLNVTEQEK.[I]	1xBiotin [K1]	1	4	P06733-1	P06733-1 [81-89]	P06733-1 1xBiotin [K81]	alpha-enolase [OS=Homo sapiens]	1	1314.67	16386.9	3074.66	4298.89	89421	53830.5	28956.4	NoTM	outside	Cytoplasm;Cell membrane;Cytoplasm, myofibril, sarcomere, M line;ENO1 is localized to the M line;[Isoform MBP-1]: Nucleus;[Isoform MBP-1]: Nucleus	ENO1	7.24766	2.85751	0.0518522	1.28523	234	0.141596	0.848948
[-].MAAVKTLNPK.[A]	1xBiotin [K5]; 1xMet-loss+Acetyl [N-Term]	2	1	P40227-1	P40227-1 [1-10]	P40227-1 1xBiotin [K5]; 1xMet-loss+Acetyl [N-Term]	T-complex protein 1 subunit zeta [OS=Homo sapiens]	1	1209.67	316121	298065	262713	55839.4	219632	178908	NoTM	outside	Cytoplasm	CCT6A	0.518167	-0.948512	0.0526801	1.27835	235	0.143245	0.843921
[R].KFVADGIFK.[A]	1xBiotin [K1]	2	1	P23396-1	P23396-1 [10-18]	P23396-1 1xBiotin [K10]	40S ribosomal protein S3 [OS=Homo sapiens]	1	1250.66	2255.03	4323.32	2185.32	8739.21	5433.83	5334.22	NoTM	outside	Cytoplasm;Nucleus;Nucleus, nucleolus;Mitochondrion inner membrane;Cytoplasm, cytoskeleton, spindle;Nuclear translocation is induced by DNA damaging agents such as hydrogen peroxide (PubMed:17560175);Accumulates in the mitochondrion in response to increased ROS levels (PubMed:23911537);Localizes to the spindle during mitosis (PubMed:23131551);Localized in cytoplasmic mRNP granules containing untra…	RPS3	2.22593	1.15441	0.0534175	1.27232	236	0.144635	0.839728
[K].SIDLKDK.[Y]	1xBiotin [K5]	2	1	P10809	P10809 [83-89]	P10809 1xBiotin [K87]	60 kDa heat shock protein, mitochondrial [OS=Homo sapiens]	1	1044.54	5024.45	2041.73	4339.78	21811.1	13835.4	8357.47	NoTM	outside	Mitochondrion matrix	HSPD1	3.85798	1.94785	0.0535064	1.27159	237	0.144264	0.840842
[K].STGGKAPR.[K]	1xBiotin [K5]	5	2	P84243	P84243 [11-18]	P84243 1xBiotin [K15]	histone H3.3 [OS=Homo sapiens]	1	999.504	3948.87	3111.31	5577.17	12668.3	8824.84	6615.77	NoTM	inside	Nucleus;Chromosome	H3F3B	2.22427	1.15333	0.0541501	1.2664	238	0.145386	0.837477
[K].KLEDGPKFLK.[S]	1xBiotin [K7]	3	7	P68104	P68104 [386-395]	P68104 1xBiotin [K392]	Elongation factor 1-alpha 1 [OS=Homo sapiens]	2	1400.76	5375.77	28766.5	31977.4	104740	70514	45164.9	NoTM	outside	Cytoplasm;Nucleus;Nucleus, nucleolus;Cell membrane;Translocates together with ZPR1 from the cytoplasm to the nucleus and nucleolus after treatment with mitogens (PubMed:8650580);Localization at the cell membrane depends on EEF1A1 phosphorylation status and the presence of PPP1R16B (PubMed:26497934)	EEF1A1	3.33364	1.7371	0.0552134	1.25796	239	0.147621	0.830852
[K].VGEFSGANKEK.[L]	1xBiotin [K9]	2	2	P10599-1	P10599-1 [86-96]	P10599-1 1xBiotin [K94]	thioredoxin [OS=Homo sapiens]	1	1391.66	5593.2	2110.09	3375.7	21314.1	13573.7	8083.99	NoTM	inside	Nucleus;Cytoplasm;Secreted;Predominantly in the cytoplasm in non irradiated cells (PubMed:11118054);Radiation induces translocation of TRX from the cytoplasm to the nucleus (PubMed:11118054);Secreted by a leaderless secretory pathway (PubMed:1332947)	TXN	3.87867	1.95556	0.0553651	1.25676	240	0.14741	0.831474
[K].WGFTGQKTEEVK.[Q]	1xBiotin [K7]	2	2	Q9NYU2-1	Q9NYU2-1 [1238-1249]	Q9NYU2-1 1xBiotin [K1244]	UDP-glucose:glycoprotein glucosyltransferase 1 [OS=Homo sapiens]	1	1635.78	26458	10884.9	13325	5604.97	2807.48	2696.95	HasTM	outside	Endoplasmic reticulum lumen;Endoplasmic reticulum- Golgi intermediate compartment	UGGT1	0.21926	-2.18929	0.0554926	1.25576	241	0.147136	0.832281
[R].KLLEGEESR.[LI]	1xBiotin [K1]	7	2	P08670	P08670 [402-410]	P08670 1xBiotin [K402]	Vimentin [OS=Homo sapiens]	1	1286.64	2391.08	4177.83	5166.72	22956.8	11536.3	10247.8	NoTM	outside	Cytoplasm;Cytoplasm, cytoskeleton;Nucleus matrix	VIM	3.8124	1.9307	0.0557719	1.25358	242	0.147266	0.831899
[K].SKGIAYIEFK.[T]	1xBiotin [K2]	1	2	P19338	P19338 [428-437]	P19338 1xBiotin [K429]	Nucleolin [OS=Homo sapiens]	1	1381.72	4673.61	2280.67	2807.07	26130.2	13187.4	10058.4	NoTM	outside	Nucleus, nucleolus;Cytoplasm	NCL	5.05832	2.33866	0.0566566	1.24675	243	0.148986	0.826855
[K].DSKPSSTPR.[S]	1xBiotin [K3]	2	1	P06748	P06748 [213-221]	P06748 1xBiotin [K215]	Nucleophosmin [OS=Homo sapiens]	0	1200.57	2209.2	2222.42	2842.64	29024.1	15463.2	9260.86	NoTM	outside	Nucleus, nucleolus;Nucleus, nucleoplasm;Cytoplasm, cytoskeleton, microtubule organizing center, centrosome;Has been found in the cytoplasm in patients with primary acute myelogenous leukemia (AML), but not with secondary AML;Can shuttle between cytoplasm and nucleus;Co- localizes with the methylated form of RPS10 in the granular component (GC) region of the nucleolus;Colocalized with nucleolin an…	NPM1	7.3888	2.88534	0.0568052	1.24561	244	0.148765	0.827501
[R].KEAAENSLVAYK.[A]	1xBiotin [K1]	2	2	P62258-1	P62258-1 [142-153]	P62258-1 1xBiotin [K142]	14-3-3 protein epsilon [OS=Homo sapiens]	1	1548.77	3989.85	2437.89	3216.29	23400.5	12427	8830.9	NoTM	outside	Nucleus;Cytoplasm;Melanosome	YWHAE	4.63068	2.21122	0.056998	1.24414	245	0.14866	0.827806
[R].VLGPKIEAVQK.[V]	1xBiotin [K5]	4	4	Q7Z4V5	Q7Z4V5 [550-560]	Q7Z4V5 1xBiotin [K554]	Hepatoma-derived growth factor-related protein 2 [OS=Homo sapiens]	1	1407.8	5566.71	7503.13	14844.7	18109.7	16585.7	16128.8	NoTM	outside	Nucleus	HDGFL2	1.82071	0.864501	0.0573543	1.24143	246	0.148981	0.826868
[K].KFVPDYYK.[VM]	1xBiotin [K1]	11	1	Q8IZX4	Q8IZX4 [1554-1561]	Q8IZX4 1xBiotin [K1554]	transcription initiation factor TFIID subunit 1-like [OS=Homo sapiens]	1	1285.63	30766.3	15595.9	18364.1	3989.61	11278.2	8781.64	NoTM	outside	Nucleus	TAF1L	0.371556	-1.42835	0.0574349	1.24082	247	0.148587	0.82802
[K].VLSKEFHLNESGDPSSK.[S]	1xBiotin [K4]	4	2	Q01105	Q01105 [151-167]	Q01105 1xBiotin [K154]	Protein SET [OS=Homo sapiens]	1	2100.01	2158.55	3353.1	2576.52	29869	15213.6	10081.9	NoTM	outside	Cytoplasm, cytosol;Endoplasmic reticulum;Nucleus, nucleoplasm;The SET complex is associated with the endoplasmic reticulum;Following CTL attack and cleavage by GZMA, moves rapidly to the nucleus, where it is found in the nucleoplasm, avoiding the nucleolus;Similar translocation to the nucleus is also observed for lymphocyte-activated killer cells after the addition of calcium	SET	6.82038	2.76985	0.0574421	1.24077	248	0.148006	0.82972
[R].ILGPGLNKAGK.[F]	1xBiotin [K11]	1	1	P62906	P62906 [123-133]	P62906 1xBiotin [K133]	60S ribosomal protein L10A [OS=Homo sapiens]	1	1293.73	2267.54	2553.52	3413.81	12957.3	7104.49	5798.29	NoTM	outside	NO_DATA	RPL10A	3.14032	1.65091	0.057764	1.23834	249	0.148238	0.829041
[R].GAPLAKVVFR.[D]	1xBiotin [K6]	1	4	P62917	P62917 [55-64]	P62917 1xBiotin [K60]	60S ribosomal protein L8 [OS=Homo sapiens]	1	1283.73	31861.4	25003.7	23366.6	22059.7	11540.6	8944.36	NoTM	outside	Cytoplasm	RPL8	0.530272	-0.915194	0.0583021	1.23432	250	0.14902	0.826755
[K].IKGEHPGLSIGDVAK.[K]	1xBiotin [K2]	2	1	P09429	P09429 [113-127]	P09429 1xBiotin [K114]	High mobility group protein B1 [OS=Homo sapiens]	1	1746.92	3183.34	2162.3	3677.03	12361.7	8738.78	4978.75	NoTM	outside	Nucleus;Chromosome;Cytoplasm;Secreted;Cell membrane;Endosome;Endoplasmic reticulum-Golgi intermediate compartment;Shuttles between the cytoplasm and the nucleus (PubMed:12231511, PubMed:17114460);Translocates from the nucleus to the cytoplasm upon autophagy stimulation (PubMed:20819940);Release from macrophages in the extracellular milieu requires the activation of NLRC4 or NLRP3 inflammasomes (B…	HMGB1	2.89041	1.53127	0.0593599	1.22651	251	0.151119	0.82068
[R].IASHSHVKGLGLDESGLAK.[Q]	1xBiotin [K8]	2	2	Q9Y265	Q9Y265 [15-33]	Q9Y265 1xBiotin [K22]	RuvB-like 1 [OS=Homo sapiens]	1	2145.11	2199.22	3691.13	4128.24	12041.2	6755.34	6321.36	NoTM	outside	Nucleus matrix;Nucleus, nucleoplasm;Cytoplasm;Membrane;Cytoplasm, cytoskeleton, microtubule organizing center, centrosome;In prophase and prometaphase it is located at the centrosome and the branching microtubule spindles;After mitotic nuclear membrane disintigration it accumulates at the centrosome and sites of tubulin polymerization;As cells pass through metaphase and into telophase it is locat…	RUVBL1	2.50713	1.32603	0.0594759	1.22566	252	0.150814	0.821559
[R].TTTGNKVFGALK.[G]	1xBiotin [K6]	1	2	P46777	P46777 [153-164]	P46777 1xBiotin [K158]	60S ribosomal protein L5 [OS=Homo sapiens]	1	1462.77	4480.7	2872.4	5410.84	13644.8	8825.21	6945.49	NoTM	outside	Cytoplasm;Nucleus, nucleolus	RPL5	2.30458	1.2045	0.0595514	1.22511	253	0.150408	0.822728
[K].SGVKIHVSDQELQSANASVDDSR.[L]	1xBiotin [K4]	2	2	P22314	P22314 [803-825]	P22314 1xBiotin [K806]	Ubiquitin-like modifier-activating enzyme 1 [OS=Homo sapiens]	1	2668.26	3206.43	4061.39	4950.9	7378.11	7759.59	4964.34	NoTM	outside	Cytoplasm;Mitochondrion;Nucleus;[Isoform 1]: Nucleus;[Isoform 2]: Cytoplasm;[Isoform 1]: Nucleus;[Isoform 2]: Cytoplasm;[Isoform 2]: Cytoplasm	UBA1	1.64518	0.718249	0.0598874	1.22266	254	0.150662	0.821998
[R].KGESGQSWPR.[L]	1xBiotin [K1]	3	3	Q15185	Q15185 [79-88]	Q15185 1xBiotin [K79]	Prostaglandin E synthase 3 [OS=Homo sapiens]	1	1357.63	4767.47	2733.24	5287.3	21367.5	11012.6	9669.68	NoTM	outside	Cytoplasm	PTGES3	3.28822	1.7173	0.0611737	1.21344	255	0.153294	0.814475
[R].LIGDAAKNQLTSNPENTVFDAK.[R]	1xBiotin [K7]	1	1	P11021	P11021 [75-96]	P11021 1xBiotin [K81]	78 kDa glucose-regulated protein [OS=Homo sapiens]	1	2572.27	2207.26	2818.87	2494.04	6554.01	3217.93	5285.36	NoTM	outside	Endoplasmic reticulum lumen;Melanosome;Cytoplasm	HSPA5	2.00225	1.00162	0.0638067	1.19513	256	0.159268	0.797873
[K].FSEVLKR.[L]	1xBiotin [K6]	1	2	P12277	P12277 [308-314]	P12277 1xBiotin [K313]	Creatine kinase B-type [OS=Homo sapiens]	1	1104.59	5889.88	3885.84	4422.9	29551.1	12591.4	13854.1	NoTM	outside	Cytoplasm	CKB	3.94381	1.97959	0.064058	1.19343	257	0.159273	0.797859
[K].LEDGPKFLK.[S]	1xBiotin [K6]	3	1	P68104	P68104 [387-395]	P68104 1xBiotin [K392]	Elongation factor 1-alpha 1 [OS=Homo sapiens]	1	1272.67	3444.83	2499.95	3061.92	35083.8	14024	13622.8	NoTM	outside	Cytoplasm;Nucleus;Nucleus, nucleolus;Cell membrane;Translocates together with ZPR1 from the cytoplasm to the nucleus and nucleolus after treatment with mitogens (PubMed:8650580);Localization at the cell membrane depends on EEF1A1 phosphorylation status and the presence of PPP1R16B (PubMed:26497934)	EEF1A1	6.96489	2.8001	0.0650287	1.1869	258	0.161059	0.793014
[R].DKPHVNVGTIGHVDHGK.[T]	1xBiotin [K2]	1	1	P49411	P49411 [54-70]	P49411 1xBiotin [K55]	elongation factor Tu, mitochondrial [OS=Homo sapiens]	0	2036.01	4123.09	4411.13	5686.67	17876.1	15715.2	6721	NoTM	outside	Mitochondrion	TUFM	2.83472	1.50321	0.0652572	1.18537	259	0.161001	0.793171
[K].KVTHAVVTVPAYFNDAQR.[Q]	1xBiotin [K1]	1	1	P11021	P11021 [164-181]	P11021 1xBiotin [K164]	78 kDa glucose-regulated protein [OS=Homo sapiens]	1	2242.14	5259.18	2778.12	3318.85	22743.1	13443.1	7947.72	NoTM	outside	Endoplasmic reticulum lumen;Melanosome;Cytoplasm	HSPA5	3.88634	1.95841	0.0672862	1.17207	260	0.165369	0.781546
[K].VIATKVLGTVK.[W]	1xBiotin [K5]	4	3	P16989-1; P67809	P16989-1 [86-96]; P67809 [54-64]	P16989-1 1xBiotin [K90]; P67809 1xBiotin [K58]	Y-box-binding protein 3 [OS=Homo sapiens] Nuclease-sensitive element-binding protein 1 [OS=Homo sapiens]	1	1354.81	2840.59	3186.96	4480.19	19401.1	8348.83	9355.77	NoTM	outside	Cytoplasm;Nucleus	YBX3	3.53127	1.82019	0.0676221	1.16991	261	0.165557	0.781051
[R].QQEGFKGTFPDAR.[E]	1xBiotin [K6]	2	12	Q15233	Q15233 [366-378]	Q15233 1xBiotin [K371]	Non-POU domain-containing octamer-binding protein [OS=Homo sapiens]	1	1706.8	121540	63916.6	64070.9	41101.5	31602.6	31918	NoTM	outside	Nucleus;Nucleus, nucleolus;Nucleus speckle	NONO	0.419281	-1.25401	0.0678105	1.1687	262	0.165385	0.781503
[R].LIGDAAKNQVALNPQNTVFDAK.[R]	1xBiotin [K7]	2	10	P0DMV8	P0DMV8 [50-71]	P0DMV8 1xBiotin [K56]	heat shock 70 kDa protein 1A [OS=Homo sapiens]	1	2553.31	45214.3	37730.3	29503.4	201325	111376	77283	NoTM	outside	Cytoplasm;Nucleus;Cytoplasm, cytoskeleton, microtubule organizing center, centrosome	HSPA1A	3.46813	1.79416	0.0680754	1.16701	263	0.1654	0.781465
[K].KPAAATVTK.[K]	1xBiotin [K1]	1	2	P16403	P16403 [160-168]	P16403 1xBiotin [K160]	Histone H1.2 [OS=Homo sapiens]	0	1112.61	5460.47	2111.12	5493.05	29448.4	19989.8	8782.41	NoTM	outside	Nucleus;Chromosome;Distribution goes in parallel with DNA concentration	HIST1H1C	4.45635	2.15586	0.0684496	1.16463	264	0.165679	0.780732
[K].KHLEINPDHPIVETLR.[Q]	1xBiotin [K1]	1	4	P08238	P08238 [624-639]	P08238 1xBiotin [K624]	Heat shock protein HSP 90-beta [OS=Homo sapiens]	1	2137.12	3634.99	3763.1	7938.17	150135	62454.8	44334.7	NoTM	outside	Cytoplasm;Melanosome;Nucleus;Secreted;Cell membrane;Translocates with BIRC2 from the nucleus to the cytoplasm during differentiation (PubMed:18239673);Secreted when associated with TGFB1 processed form (LAP) (PubMed:20599762)	HSP90AB1	16.7527	4.06632	0.0694843	1.15811	265	0.167549	0.775858
[K].IEKAVVSQR.[L]	1xBiotin [K3]	1	1	P14625	P14625 [631-639]	P14625 1xBiotin [K633]	Endoplasmin [OS=Homo sapiens]	1	1255.68	4623.63	2658.48	5319.62	8229.84	9021.14	5374.46	NoTM	outside	Endoplasmic reticulum lumen;Sarcoplasmic reticulum lumen;Melanosome	HSP90B1	1.79542	0.844325	0.0705224	1.15167	266	0.169413	0.771054
[K].HAAENPGKYNILGTNTIMDK.[M]	1xBiotin [K8]; 1xOxidation [M18]	2	4	Q00839	Q00839 [517-536]	Q00839 1xBiotin [K524]	Heterogeneous nuclear ribonucleoprotein U [OS=Homo sapiens]	1	2429.16	36790	35421.9	22280.2	18604.1	22969.3	14222.4	NoTM	outside	Nucleus;Nucleus matrix;Chromosome;Nucleus speckle;Cytoplasm, cytoskeleton, microtubule organizing center, centrosome;Chromosome, centromere, kinetochore;Cytoplasm, cytoskeleton, spindle;Cytoplasm, cytoskeleton, spindle pole;Midbody;Cytoplasm;Cell surface;Cytoplasmic granule;Localizes in the nucleus during interphase (PubMed:21242313);At metaphase, localizes with mitotic spindle microtubules (MTs)…	HNRNPU	0.590481	-0.760038	0.0706204	1.15107	267	0.169013	0.77208
[R].SKGQESFK.[K]	1xBiotin [K2]	2	2	P06748	P06748 [222-229]	P06748 1xBiotin [K223]	Nucleophosmin [OS=Homo sapiens]	1	1136.54	2605.84	12406.5	4672.78	72855.8	32416.1	25263.6	NoTM	outside	Nucleus, nucleolus;Nucleus, nucleoplasm;Cytoplasm, cytoskeleton, microtubule organizing center, centrosome;Has been found in the cytoplasm in patients with primary acute myelogenous leukemia (AML), but not with secondary AML;Can shuttle between cytoplasm and nucleus;Co- localizes with the methylated form of RPS10 in the granular component (GC) region of the nucleolus;Colocalized with nucleolin an…	NPM1	6.63118	2.72927	0.0708412	1.14971	268	0.168909	0.772348
[K].EGVHGGLINKK.[C]	1xBiotin [K10]	1	1	P07737	P07737 [117-127]	P07737 1xBiotin [K126]	profilin-1 [OS=Homo sapiens]	1	1377.73	2768.03	5093.22	4170.7	15605.2	13251.6	5640.6	NoTM	outside	Cytoplasm, cytoskeleton	PFN1	2.86715	1.51962	0.0720048	1.14264	269	0.171045	0.76689
[R].LSVDYGKK.[S]	1xBiotin [K]	8	7	P68363	P68363 [157-164]	P68363 1xBiotin [K]	Tubulin alpha-1B chain [OS=Homo sapiens]	1	1135.58	46843.6	38720.8	41676.3	69921.1	59090.9	47698.6	NoTM	outside	Cytoplasm, cytoskeleton	TUBA1B	1.38879	0.47383	0.073511	1.13365	270	0.173976	0.75951
[K].KQMADTGK.[L]	1xBiotin [K1]	2	1	Q00839	Q00839 [544-551]	Q00839 1xBiotin [K544]	Heterogeneous nuclear ribonucleoprotein U [OS=Homo sapiens]	1	1104.52	4998.71	3344.98	4066.28	6332.42	5005.47	5513.02	NoTM	outside	Nucleus;Nucleus matrix;Chromosome;Nucleus speckle;Cytoplasm, cytoskeleton, microtubule organizing center, centrosome;Chromosome, centromere, kinetochore;Cytoplasm, cytoskeleton, spindle;Cytoplasm, cytoskeleton, spindle pole;Midbody;Cytoplasm;Cell surface;Cytoplasmic granule;Localizes in the nucleus during interphase (PubMed:21242313);At metaphase, localizes with mitotic spindle microtubules (MTs)…	HNRNPU	1.35785	0.441327	0.0738824	1.13146	271	0.17421	0.758927
[K].GGKGLGK.[G]	1xBiotin [K3]	1	1	P62805	P62805 [7-13]	P62805 1xBiotin [K9]	histone H4 [OS=Homo sapiens]	1	842.455	5222.78	2440.25	7172.58	49800	26557.4	14238.5	NoTM	outside	Nucleus;Chromosome	HIST4H4	6.10666	2.61038	0.0742399	1.12936	272	0.174409	0.758431
[K].KGQSEEIQK.[K]	1xBiotin [K1]	1	2	P83731	P83731 [61-69]	P83731 1xBiotin [K61]	60S ribosomal protein L24 [OS=Homo sapiens]	1	1272.63	2245.63	3800.63	5238.1	19687.9	19229.5	5776.86	NoTM	outside	NO_DATA	RPL24	3.96073	1.98577	0.0744969	1.12786	273	0.174372	0.758524
[K].VKEDPDGEHAR.[R]	1xBiotin [K2]	2	1	P52272	P52272 [144-154]	P52272 1xBiotin [K145]	Heterogeneous nuclear ribonucleoprotein M [OS=Homo sapiens]	1	1478.67	2230.03	2556.1	3202.9	11872.5	5732.77	5504.64	NoTM	outside	Nucleus, nucleolus	HNRNPM	2.8927	1.53242	0.07482	1.12598	274	0.174489	0.758232
[K].EFDGKSLVSVTK.[E]	1xBiotin [K5]	3	2	P08238	P08238 [527-538]	P08238 1xBiotin [K531]	Heat shock protein HSP 90-beta [OS=Homo sapiens]	1	1535.78	5296.45	3141.24	5829.25	22420.1	11814.5	9372.1	NoTM	outside	Cytoplasm;Melanosome;Nucleus;Secreted;Cell membrane;Translocates with BIRC2 from the nucleus to the cytoplasm during differentiation (PubMed:18239673);Secreted when associated with TGFB1 processed form (LAP) (PubMed:20599762)	HSP90AB1	3.05649	1.61187	0.0749891	1.125	275	0.174247	0.758834
[K].ANEVISKLYAVHQEGNK.[N]	1xBiotin [K7]	3	1	P50990	P50990 [460-476]	P50990 1xBiotin [K466]	T-complex protein 1 subunit theta [OS=Homo sapiens]	1	2126.07	5231.13	2040.21	2169.29	8260.53	5823.44	5251.82	NoTM	outside	Cytoplasm;Cytoplasm, cytoskeleton, microtubule organizing center, centrosome;Cytoplasm, cytoskeleton, cilium basal body	CCT8	2.04814	1.03432	0.0769004	1.11407	276	0.178041	0.749479
[K].KPAAAAGAKK.[A]	1xBiotin [K9]	1	4	P10412	P10412 [160-169]	P10412 1xBiotin [K168]	Histone H1.4 [OS=Homo sapiens]	1	1138.64	2100.59	3553.57	3416.76	34300	22521.3	7488.39	NoTM	outside	Nucleus;Chromosome;Dysplays a punctuate staining pattern in the nucleus	HIST1H1E	7.08965	2.82571	0.0769096	1.11402	277	0.17742	0.750998
[R].KVDWLTEK.[M]	1xBiotin [K1]	5	1	P60842	P60842 [284-291]	P60842 1xBiotin [K284]	Eukaryotic initiation factor 4A-I [OS=Homo sapiens]	1	1244.63	2314.68	2005.19	5418.47	16192.3	8737.25	6654.4	NoTM	outside	NO_DATA	EIF4A1	3.24326	1.69744	0.0781864	1.10687	278	0.179716	0.745413
[R].NIGKTLVTR.[T]	1xBiotin [K4]	1	1	P61247	P61247 [43-51]	P61247 1xBiotin [K46]	40S ribosomal protein S3a [OS=Homo sapiens]	1	1227.69	24720.4	16129.2	16355	15450.7	2656.55	5246.18	NoTM	outside	Cytoplasm;Nucleus	RPS3A	0.408244	-1.2925	0.0793344	1.10054	279	0.181701	0.740642
[K].TFNLEKQNHTPR.[K]	1xBiotin [K6]	1	1	Q15233	Q15233 [6-17]	Q15233 1xBiotin [K11]	Non-POU domain-containing octamer-binding protein [OS=Homo sapiens]	1	1710.84	5310.13	5895.22	4208.71	22936.1	10134.6	11263.7	NoTM	outside	Nucleus;Nucleus, nucleolus;Nucleus speckle	NONO	2.87623	1.52418	0.0794791	1.09975	280	0.181383	0.741404
[R].SGKYDLDFK.[S]	1xBiotin [K3]	2	5	P06733-1	P06733-1 [254-262]	P06733-1 1xBiotin [K256]	alpha-enolase [OS=Homo sapiens]	1	1298.61	20903.9	12908.5	14612.9	62981.3	36032.8	26918.4	NoTM	outside	Cytoplasm;Cell membrane;Cytoplasm, myofibril, sarcomere, M line;ENO1 is localized to the M line;[Isoform MBP-1]: Nucleus;[Isoform MBP-1]: Nucleus	ENO1	2.60055	1.37882	0.0803969	1.09476	281	0.182824	0.737966
[R].GPIKFNVWDTAGQEK.[F]	1xBiotin [K4]	1	4	P62826	P62826 [57-71]	P62826 1xBiotin [K60]	GTP-binding nuclear protein RAN [OS=Homo sapiens]	1	1915.94	4363.32	2378.62	5178.19	26903.4	15155.7	8180.03	NoTM	outside	Nucleus;Nucleus envelope;Cytoplasm, cytosol;Cytoplasm;Melanosome;Becomes dispersed throughout the cytoplasm during mitosis (PubMed:8421051, PubMed:12194828);Identified by mass spectrometry in melanosome fractions from stage I to stage IV (PubMed:17081065)	RAN	4.21465	2.07541	0.0819056	1.08669	282	0.185595	0.731435
[K].TLGDFAAEYAKSNR.[S]	1xBiotin [K11]	1	1	P09874	P09874 [109-122]	P09874 1xBiotin [K119]	Poly [ADP-ribose] polymerase 1 [OS=Homo sapiens]	1	1768.83	2194.51	4967.28	2160.84	6967.7	4946.04	5212.89	NoTM	outside	Nucleus;Nucleus, nucleolus;Chromosome	PARP1	1.8371	0.877434	0.0819254	1.08658	283	0.184983	0.732867
[R].LIFAGKQLEDGR.[T]	1xBiotin [K6]	4	3	P62987	P62987 [43-54]	P62987 1xBiotin [K48]	Ubiquitin-60S ribosomal protein L40 [OS=Homo sapiens]	1	1572.82	19898.8	7948.63	10304.5	152973	63031.6	49071.9	NoTM	outside	[Ubiquitin]: Cytoplasm;Nucleus;[60S ribosomal protein L40]: Cytoplasm;[60S ribosomal protein L40]: Cytoplasm	UBA52	6.94791	2.79658	0.0821378	1.08546	284	0.18481	0.733275
[K].VTKDGVTVAK.[S]	1xBiotin [K3]	2	2	P10809	P10809 [73-82]	P10809 1xBiotin [K75]	60 kDa heat shock protein, mitochondrial [OS=Homo sapiens]	1	1243.67	4546.33	3707.93	4291.26	32028.7	15711.4	10153	NoTM	outside	Mitochondrion matrix	HSPD1	4.61464	2.20622	0.0828496	1.08171	285	0.185757	0.731054
[K].YIDQEELNKTKPIWTR.[N]	1xBiotin [K9]	5	1	P07900; P08238	P07900 [284-299]; P08238 [276-291]	P07900 1xBiotin [K292]; P08238 1xBiotin [K284]	Heat shock protein HSP 90-alpha [OS=Homo sapiens] Heat shock protein HSP 90-beta [OS=Homo sapiens]	1	2260.14	5646.32	3606.9	3768.76	27766	16103	8276.96	NoTM	outside	Nucleus;Cytoplasm;Melanosome;Cell membrane	HSP90AA1	4.00446	2.00161	0.0840433	1.0755	286	0.187775	0.726362
[K].AGGTKPK.[K]	1xBiotin [K5]	1	1	P16403	P16403 [123-129]	P16403 1xBiotin [K127]	Histone H1.2 [OS=Homo sapiens]	0	884.466	4536.98	2566.07	2178.72	8400.77	5976.03	4366.71	NoTM	outside	Nucleus;Chromosome;Distribution goes in parallel with DNA concentration	HIST1H1C	2.01939	1.01392	0.0844643	1.07333	287	0.188058	0.725708
[R].IFAPNHVVAKSR.[F]	1xBiotin [K10]	1	1	Q02543	Q02543 [32-43]	Q02543 1xBiotin [K41]	60S ribosomal protein L18a [OS=Homo sapiens]	1	1564.84	3764.04	2236.18	2460.27	17537.9	9081.95	5841.02	NoTM	outside	NO_DATA	RPL18A	3.83676	1.93989	0.0854087	1.0685	288	0.1895	0.72239
[R].TPKIVSGK.[DV]	1xBiotin [K3]	5	1	P00338-1	P00338-1 [74-81]	P00338-1 1xBiotin [K76]	L-lactate dehydrogenase A chain [OS=Homo sapiens]	1	1055.59	5308.38	4031.22	7435.38	24946.1	14733.6	9143.34	NoTM	outside	Cytoplasm	LDHA	2.91047	1.54125	0.0869068	1.06095	289	0.192157	0.716343
[K].SDVEAIFSKYGK.[I]	1xBiotin [K9]	6	1	P07910-1	P07910-1 [31-42]	P07910-1 1xBiotin [K39]	Heterogeneous nuclear ribonucleoproteins C1/C2 [OS=Homo sapiens]	1	1569.76	2365.74	4099.26	4063.78	7489.09	5001.18	4929.15	NoTM	outside	Nucleus	HNRNPC	1.65446	0.726359	0.0869459	1.06075	290	0.191581	0.717648
[K].LPNLGKHEK.[F]	1xBiotin [K6]	1	2	P12277	P12277 [299-307]	P12277 1xBiotin [K304]	Creatine kinase B-type [OS=Homo sapiens]	1	1261.67	4513.61	2617.94	4147.39	40580	24797.9	8575.63	NoTM	outside	Cytoplasm	CKB	6.55679	2.71299	0.0869932	1.06051	291	0.191026	0.718907
[R].LAADVGKAGAER.[E]	1xBiotin [K7]	1	1	P05141	P05141 [141-152]	P05141 1xBiotin [K147]	ADP/ATP translocase 2 [OS=Homo sapiens]	1	1383.7	3428.77	4252.14	5875.26	13754.7	10166	5843.46	HasTM	inside	Mitochondrion inner membrane;Multi-pass membrane protein	SLC25A5	2.19562	1.13463	0.0872939	1.05902	292	0.19103	0.718898
[K].IGIEIIKR.[T]	1xBiotin [K7]	1	3	P10809	P10809 [463-470]	P10809 1xBiotin [K469]	60 kDa heat shock protein, mitochondrial [OS=Homo sapiens]	1	1167.69	3143.24	2241.64	4655.91	42431.2	17791.3	12381.9	NoTM	outside	Mitochondrion matrix	HSPD1	7.23094	2.85418	0.0877808	1.0566	293	0.19144	0.717967
[K].TEWLDGKHVVFGK.[V]	1xBiotin [K7]	2	5	P62937	P62937 [119-131]	P62937 1xBiotin [K125]	peptidyl-prolyl cis-trans isomerase A [OS=Homo sapiens]	1	1741.87	29305.7	19898.1	25117.7	80366.2	45275.4	38282.7	NoTM	outside	Cytoplasm;Secreted	PPIA	2.20561	1.14118	0.0880837	1.0551	294	0.191447	0.717951
[R].KFLPLFDR.[V]	1xBiotin [K1]	1	2	P61604	P61604 [8-15]	P61604 1xBiotin [K8]	10 kDa heat shock protein, mitochondrial [OS=Homo sapiens]	1	1261.68	4363.35	3138.83	3618.2	25276.5	6119.59	17063	NoTM	outside	Mitochondrion matrix	HSPE1	4.35768	2.12356	0.0887758	1.05171	295	0.192297	0.716026
[K].KAAGGATPK.[K]	1xBiotin [K1]	1	1	P16403	P16403 [140-148]	P16403 1xBiotin [K140]	Histone H1.2 [OS=Homo sapiens]	1	1026.54	2469.91	5098.62	4119.52	28412.4	16058.1	7722.47	NoTM	outside	Nucleus;Chromosome;Distribution goes in parallel with DNA concentration	HIST1H1C	4.4655	2.15882	0.0897687	1.04688	296	0.193791	0.712666
[K].KELSDIAHR.[I]	1xBiotin [K1]	2	1	P04075	P04075 [14-22]	P04075 1xBiotin [K14]	fructose-bisphosphate aldolase A [OS=Homo sapiens]	1	1294.66	21308.8	4601.08	4417.9	39335.5	20826.5	23648.6	NoTM	outside	Cytoplasm, myofibril, sarcomere, I band;Cytoplasm, myofibril, sarcomere, M line	ALDOA	2.76349	1.46649	0.0906438	1.04266	297	0.195021	0.709918
[K].KSADTLWDIQK.[D]	1xBiotin [K1]	1	2	P07195	P07195 [319-329]	P07195 1xBiotin [K319]	L-lactate dehydrogenase B chain [OS=Homo sapiens]	1	1530.76	2798.76	2080.58	3782.66	40881.4	16789	11401	NoTM	outside	Cytoplasm	LDHB	7.97407	2.99532	0.0907654	1.04208	298	0.194628	0.710795
[K].ATGQKAAPAPK.[A]	1xBiotin [K5]	1	2	P50914	P50914 [183-193]	P50914 1xBiotin [K187]	60S ribosomal protein L14 [OS=Homo sapiens]	1	1265.67	2533.15	5456.03	2734.29	17622.5	10103.9	6185.1	NoTM	outside	NO_DATA	RPL14	3.16236	1.661	0.0908648	1.0416	299	0.194189	0.711775
[K].KSDPVVSYR.[E]	1xBiotin [K1]	1	2	P13639	P13639 [572-580]	P13639 1xBiotin [K572]	Elongation factor 2 [OS=Homo sapiens]	1	1276.64	5291.22	4998.41	3838.08	17950	9522.94	7760.73	NoTM	outside	Cytoplasm;Nucleus	EEF2	2.49395	1.31843	0.0910535	1.0407	300	0.193944	0.712324
[RK].KHEAFESDLAAHQDR.[V]	1xBiotin [K1]	8	3	P12814-1	P12814-1 [436-450]	P12814-1 1xBiotin [K436]	Alpha-actinin-1 [OS=Homo sapiens]	1	1979.9	3572.16	5001.74	5614.45	25026.3	16260	7237.83	NoTM	outside	Cytoplasm, cytoskeleton;Cytoplasm, myofibril, sarcomere, Z line;Cell membrane;Cell junction;Cell projection, ruffle;Colocalizes with PSD in membrane ruffles and central reticular structures	ACTN1	3.42	1.77399	0.091275	1.03965	301	0.19377	0.712714
[K].KQAGPASVPLR.[T]	1xBiotin [K1]	1	3	P30101	P30101 [130-140]	P30101 1xBiotin [K130]	Protein disulfide-isomerase A3 [OS=Homo sapiens]	1	1349.74	5153.69	5451.16	3827.11	24150.6	8736.93	12459.1	NoTM	outside	Endoplasmic reticulum;Endoplasmic reticulum lumen;Melanosome	PDIA3	3.1421	1.65173	0.0919873	1.03627	302	0.194635	0.710778
[R].AMTKDNNLLGR.[F]	1xBiotin [K4]	4	4	P0DMV8	P0DMV8 [448-458]	P0DMV8 1xBiotin [K451]	heat shock 70 kDa protein 1A [OS=Homo sapiens]	1	1458.72	4318.96	3654.34	2371.07	100097	41212	22618.5	NoTM	outside	Cytoplasm;Nucleus;Cytoplasm, cytoskeleton, microtubule organizing center, centrosome	HSPA1A	15.847	3.98614	0.0935255	1.02907	303	0.197237	0.705012
[R].EMHKTLK.[L]	1xBiotin [K4]	3	3	Q96L93-1	Q96L93-1 [1226-1232]	Q96L93-1 1xBiotin [K1229]	Kinesin-like protein KIF16B [OS=Homo sapiens]	1	1112.56	2.51972e+06	1.17029e+06	4.49277e+06	550611	564423	720023	NoTM	outside	Cytoplasm, cytoskeleton;Early endosome membrane	KIF16B	0.224258	-2.15677	0.0937142	1.02819	304	0.196985	0.705567
[R].TFIAIKPDGVQR.[G]	1xBiotin [K6]	4	1	P15531	P15531 [7-18]	P15531 1xBiotin [K12]	Nucleoside diphosphate kinase A [OS=Homo sapiens]	0	1570.84	3389.57	3784.1	4986.37	9222.86	5381.75	5993.05	NoTM	outside	Cytoplasm;Nucleus	NME1	1.69388	0.760331	0.0937784	1.0279	305	0.196473	0.706696
[K].FLNKLAEER.[R]	1xBiotin [K4]	2	1	P43243	P43243 [833-841]	P43243 1xBiotin [K836]	Matrin-3 [OS=Homo sapiens]	1	1345.69	4169.34	4570.47	3245.83	3486.8	2511.34	2783.15	NoTM	outside	Nucleus matrix	MATR3	0.732651	-0.448801	0.0938851	1.0274	306	0.196054	0.707624
[R].VFSGLVSTGLKVR.[I]	1xBiotin [K11]	1	1	P13639	P13639 [416-428]	P13639 1xBiotin [K426]	Elongation factor 2 [OS=Homo sapiens]	1	1588.89	2084.09	3510.03	2739.25	8972.43	6087.7	3675.36	NoTM	outside	Cytoplasm;Nucleus	EEF2	2.24825	1.1688	0.0940348	1.02671	307	0.195727	0.708349
[truncated: 332 more rows]

## Sheet: P<0.05 all
Annotated Sequence	Modifications	# Proteins	# PSMs	Master Protein Accessions	Positions in Master Proteins	Modifications in Master Proteins	Master Protein Descriptions	# Missed Cleavages	Theo. MH+ [Da]	Abundances (Normalized): F1: Sample, AGIA-FabID n=1	Abundances (Normalized): F11: Sample, AGIA-FabID n=2	Abundances (Normalized): F13: Sample, AGIA-FabID n=3	Abundances (Normalized): F2: Sample, EGFR-FabID n=1	Abundances (Normalized): F12: Sample, EGFR-FabID n=2	Abundances (Normalized): F14: Sample, EGFR-FabID n=3	TMHMM (TM helix)	TMHMM (in/out)	UniProt Location	Gene symbol	Ratio(EGFR-FabID/AGIA-FabID)	Ratio(Log2)	pValue	− p Value (LOG10)
[truncated: 189 more rows]

[truncated: 1 more sheets: P<0.05 membrane]
