# Supplementary material for: Proximity extracellular protein-protein interaction analysis of EGFR using AirID-conjugated fragment of antigen binding
Source: Nat Commun. 2023 Dec 14;14:8301. doi: 10.1038/s41467-023-43931-7 (PMC10721602; doi:10.1038/s41467-023-43931-7)
Supplement: Supplementary file 7 — Supplementary Data 4 [file 41467_2023_43931_MOESM7_ESM.xlsx]

## Sheet: PeptideGroups
Annotated Sequence	Modifications	# Proteins	# PSMs	Master Protein Accessions	Positions in Master Proteins	Modifications in Master Proteins	Master Protein Descriptions	# Missed Cleavages	Theo. MH+ [Da]	Abundance Ratio: (4) / (1) EGFR-FabID DMSO/AGIA-FabID DMSO	Abundance Ratio: (5) / (2) EGFR-FabID DMSO EGF/AGIA-FabID DMSO EGF	Abundance Ratio: (6) / (3) EGFR-FabID Gefitinib EGF/AGIA-FabID Gefitinib EGF	Abundance Ratio (log2): (4) / (1) EGFR-FabID DMSO/AGIA-FabID DMSO	Abundance Ratio (log2): (5) / (2) EGFR-FabID DMSO EGF/AGIA-FabID DMSO EGF	Abundance Ratio (log2): (6) / (3) EGFR-FabID Gefitinib EGF/AGIA-FabID Gefitinib EGF	Abundance Ratio P-Value: (4) / (1) EGFR-FabID DMSO/AGIA-FabID DMSO	Abundance Ratio P-Value: (5) / (2) EGFR-FabID DMSO EGF/AGIA-FabID DMSO EGF	Abundance Ratio P-Value: (6) / (3) EGFR-FabID Gefitinib EGF/AGIA-FabID Gefitinib EGF	Abundance Ratio Adj. P-Value: (4) / (1) EGFR-FabID DMSO/AGIA-FabID DMSO	Abundance Ratio Adj. P-Value: (5) / (2) EGFR-FabID DMSO EGF/AGIA-FabID DMSO EGF	Abundance Ratio Adj. P-Value: (6) / (3) EGFR-FabID Gefitinib EGF/AGIA-FabID Gefitinib EGF	Abundances (Grouped): 1 AGIA-FabID DMSO	Abundances (Grouped): 2 AGIA-FabID DMSO EGF	Abundances (Grouped): 3 AGIA-FabID Gefitinib EGF	Abundances (Grouped): 4 EGFR-FabID DMSO	Abundances (Grouped): 5 EGFR-FabID DMSO EGF	Abundances (Grouped): 6 EGFR-FabID Gefitinib EGF	Abundances (Scaled): F7: Sample, 1 AGIA-FabID DMSO n=1	Abundances (Scaled): F13: Sample, 1 AGIA-FabID DMSO n=2	Abundances (Scaled): F27: Sample, 1 AGIA-FabID DMSO n=3	Abundances (Scaled): F8: Sample, 2 AGIA-FabID DMSO EGF n=1	Abundances (Scaled): F14: Sample, 2 AGIA-FabID DMSO EGF n=2	Abundances (Scaled): F28: Sample, 2 AGIA-FabID DMSO EGF n=3	Abundances (Scaled): F9: Sample, 3 AGIA-FabID Gefitinib EGF n=1	Abundances (Scaled): F23: Sample, 3 AGIA-FabID Gefitinib EGF n=2	Abundances (Scaled): F29: Sample, 3 AGIA-FabID Gefitinib EGF n=3	Abundances (Scaled): F10: Sample, 4 EGFR-FabID DMSO n=1	Abundances (Scaled): F24: Sample, 4 EGFR-FabID DMSO n=2	Abundances (Scaled): F30: Sample, 4 EGFR-FabID DMSO n=3	Abundances (Scaled): F11: Sample, 5 EGFR-FabID DMSO EGF n=1	Abundances (Scaled): F25: Sample, 5 EGFR-FabID DMSO EGF n=2	Abundances (Scaled): F31: Sample, 5 EGFR-FabID DMSO EGF n=3	Abundances (Scaled): F12: Sample, 6 EGFR-FabID Gefitinib EGF n=1	Abundances (Scaled): F26: Sample, 6 EGFR-FabID Gefitinib EGF n=2	Abundances (Scaled): F33: Sample, 6 EGFR-FabID Gefitinib EGF =3	Abundances (Normalized): F7: Sample, 1 AGIA-FabID DMSO n=1	Abundances (Normalized): F13: Sample, 1 AGIA-FabID DMSO n=2	Abundances (Normalized): F27: Sample, 1 AGIA-FabID DMSO n=3	Abundances (Normalized): F8: Sample, 2 AGIA-FabID DMSO EGF n=1
[K].NIDVWKK.[W]	1xBiotin [K6]	3	10	Q08J23	Q08J23 [280-286]	Q08J23 1xBiotin [K285]	RNA cytosine C(5)-methyltransferase NSUN2 OS=Homo sapiens OX=9606 GN=NSUN2 PE=1 SV=2	1	1128.59	1000	1000	1000	9.97	9.97	9.97	1.01741e-12	1.40865e-12	1.42419e-12	1.35824e-09	1.88055e-09	1.9013e-09	0.1	0.1	0.1	235.5	184.2	180.1	0.1	0.1	0.1	0.1	0	0.1	0.1	0.1	0.1	177.4	313.1	225.1	153.6	179.7	176.1	259.3	172.1	142.9	3235.75	2115.96	1746.86	2578.61
[K].VEAANVHIDPKFISNGPFK.[D]	1xBiotin [K]	2	55	P55287	P55287 [347-365]	P55287 1xBiotin [K]	Cadherin-11 OS=Homo sapiens OX=9606 GN=CDH11 PE=1 SV=2	1	2309.17	143.628	141.217	135.123	7.17	7.14	7.08	3.9415e-05	3.50539e-05	0.000165434	0.000515872	0.000537895	0.00193732	1.4	1.7	1.2	202.8	234.9	158	2.4	1	0.9	1.2	0.7	1.2	4.7	0.8	0.8	511.3	145.8	105.8	337.7	74.7	168.9	282.5	45.8	113.6	6459.02	2723.96	2500.9	3209.73
[R].KYNELLK.[S]	1xBiotin [K1]	6	5	P10909	P10909 [340-346]	P10909 1xBiotin [K340]	Clusterin OS=Homo sapiens OX=9606 GN=CLU PE=1 SV=1	1	1133.6	1.088	28.338	1.812	0.12	4.82	0.86	0.996402	2.9954e-07	0.218328	1	1.37892e-05	0.852245	98.2	4.3	96	106.8	120.8	173.9	110.1	86.6	100.1	4.3	4.3	7.4	55.7	101.6	97.8	108.9	94.6	132.4	91.4	200.1	123.1	95.6	208.9	177.2	46622.2	36666.6	42392.1	1829.81
[K].EDAMKTK.[T]	1xBiotin [K5]	3	15	Q29983	Q29983 [171-177]	Q29983 1xBiotin [K175]	MHC class I polypeptide-related sequence A OS=Homo sapiens OX=9606 GN=MICA PE=1 SV=1	1	1048.48	37.972	28.142	14.96	5.25	4.81	3.9	3.60044e-07	6.41991e-07	6.11535e-06	1.55927e-05	2.31637e-05	0.000151185	7.1	6.1	9.1	269.4	172.2	136	4.7	9.4	7.3	6.3	9	4.7	9.3	10.2	5.4	276.6	152.5	326.9	295.6	176.8	126.9	139.7	98	140.7	1815.33	3614.85	2796.02	2411.25
[K].YLEKYYNLK.[N]	1xBiotin [K4]	1	21	P03956	P03956 [37-45]	P03956 1xBiotin [K40]	Interstitial collagenase OS=Homo sapiens OX=9606 GN=MMP1 PE=1 SV=3	1	1459.73	23.517	19.362	8.592	4.56	4.28	3.1	7.64516e-07	1.21e-06	2.89558e-05	2.68587e-05	3.75662e-05	0.000454776	8.6	9.2	21	201.7	179	180.5	5.3	8.9	15.7	14.2	9.5	6.2	24.5	15.7	21.7	208.3	155.5	225.5	184.9	212.1	147.3	206.6	151.6	186.5	2367.6	3981.44	7047.04	6397.04
[K].AGDSLMVMIAMKMEHTIK.[S]	1xBiotin [K]; 3xOxidation [M8; M11; M]	1	39	Q96RQ3	Q96RQ3 [670-687]	Q96RQ3 1xBiotin [K]	Methylcrotonoyl-CoA carboxylase subunit alpha, mitochondrial OS=Homo sapiens OX=9606 GN=MCCC1 PE=1 SV=3	1	2280.06	3.601	17.377	1.431	1.85	4.12	0.52	1	0.257698	0.958075	1	0.803331	1	27.3	17.5	62.6	98.4	304.6	89.6	334.8	15.5	11.3	14.6	9.9	3.1	147.2	35.5	3.2	256.8	55.7	4.8	172.6	51.2	334.7	271.8	50.8	26.5	245302	11341.5	8271.4	10685.1
[R].GNIDNNTPYANSFTPPIKAQYVR.[L]	1xBiotin [K18]	2	4	O43854	O43854 [273-295]	O43854 1xBiotin [K290]	EGF-like repeat and discoidin I-like domain-containing protein 3 OS=Homo sapiens OX=9606 GN=EDIL3 PE=1 SV=1	1	2806.36	1.306	16.042	1.224	0.38	4	0.29	1	0.307597	0.99996	1	0.912539	1	48.7	23.8	37	63.5	381.7	45.3	157.3	36.7	35.6	31.1	18	15.9	283.2	16	27.9	247.2	47.9	20.8	288.1	36.6	289.8	179.9	33.8	34.2	16143.7	3767.98	3649.09	3186.82
[R].NLKASLENSLR.[E]	1xBiotin [K3]	1	17	P05783	P05783 [315-325]	P05783 1xBiotin [K317]	Keratin, type I cytoskeletal 18 OS=Homo sapiens OX=9606 GN=KRT18 PE=1 SV=2	1	1470.77	2.536	13.843	3.219	1.34	3.79	1.69	0.673444	0.115802	0.874152	1	0.469895	1	35.9	16.7	53.3	90.9	231.7	171.5	99	18.3	36.4	90	7.2	17	103.9	36.6	54	216	92.2	68	252.6	58.5	234.9	182	59.4	173.9	22505.9	4164.96	8263.8	20450.6
[K].GQPLCVLSAMKMETVVTSPMEGTVR.[K]	1xBiotin [K11]; 1xCarbamidomethyl [C5]; 2xOxidation [M12; M]	1	26	P11498	P11498 [1134-1158]	P11498 1xBiotin [K1144]	Pyruvate carboxylase, mitochondrial OS=Homo sapiens OX=9606 GN=PC PE=1 SV=2	1	2979.41	1.003	12.692	1.358	0	3.67	0.44	0.999591	0.830908	1	1	1	1	56	31.3	25	56.2	397.5	34	200.2	13.7	5.3	7.7	8.1	5.4	454.8	6.1	5.2	390.1	13.7	11.2	196.3	5.3	97.3	364.9	8.3	6.4	57021	3903.87	1498.75	2183.82
[K].AAWGKVGAHAGEYGAEALER.[M]	1xBiotin [K5]	1	2	P69905	P69905 [13-32]	P69905 1xBiotin [K17]	Hemoglobin subunit alpha OS=Homo sapiens OX=9606 GN=HBA1 PE=1 SV=2	1	2269.08	2.573	12.016	2.013	1.36	3.59	1.01	0.999981	0.5408	0.998762	1	1	1	28.5	22.5	68	73.3	270.8	136.9	149.6	16.5	18	86.6	14.2	7.5	255.3	43	16.6	179.8	46.3	8.9	266.3	51.1	171.1	363.5	19.2	86.5	30587.1	3371.67	3680.95	17718.3
[K].KPKNENPVDYTVQIPPSTTYAITPMK.[R]	1xBiotin [K]; 1xOxidation [M25]	7	16	Q12906	Q12906 [346-371]	Q12906 1xBiotin [K]	Interleukin enhancer-binding factor 3 OS=Homo sapiens OX=9606 GN=ILF3 PE=1 SV=3	1	3174.58	4.569	11.846	4.806	2.19	3.57	2.26	0.968088	0.24201	0.825227	1	0.774103	1	19.7	21.9	35.9	90.1	259.9	172.4	99.2	13	13.4	14.9	16.8	12.5	138.5	19.2	24.4	282.6	61.3	8.6	254.8	53.6	176.7	457.3	36	117.2	16403.7	2142.58	2216.57	2465.6
[R].AKLEAAIAEAEER.[G]	1xBiotin [K2]	1	20	P08729	P08729 [330-342]	P08729 1xBiotin [K331]	Keratin, type II cytoskeletal 7 OS=Homo sapiens OX=9606 GN=KRT7 PE=1 SV=5	1	1626.82	1.331	11.663	2.289	0.41	3.54	1.19	0.905525	0.0370865	0.521488	1	0.202912	1	74.1	18.4	59.1	98.6	214.3	135.4	81.5	63.2	52.2	84.2	15.7	11.6	79.7	40.1	50.4	219.9	68.4	84.1	225.7	83.8	182.8	261.8	79.2	115.5	17745.7	13765.3	11365.6	18344.3
[K].TKIISNR.[G]	1xBiotin [K2]	3	11	P00533	P00533 [488-494]	P00533 1xBiotin [K489]	Epidermal growth factor receptor OS=Homo sapiens OX=9606 GN=EGFR PE=1 SV=2	1	1057.58	1.599	11.351	5.891	0.68	3.5	2.56	0.292387	1.20293e-07	9.16818e-06	1	8.92174e-06	0.000194278	125.4	11.3	19.6	200.4	128	115.4	122.2	129	140.3	10.6	11.6	13.3	12.9	30.2	20.1	206.2	168.2	209.2	131.6	147.2	129.9	77.2	121.5	118.7	227836	240447	261635	19688.9
[K].KPKNENPVDYTVQIPPSTTYAITPMK.[R]	1xBiotin [K]	7	10	Q12906	Q12906 [346-371]	Q12906 1xBiotin [K]	Interleukin enhancer-binding factor 3 OS=Homo sapiens OX=9606 GN=ILF3 PE=1 SV=3	1	3158.59	3.283	11.014	3.256	1.71	3.46	1.7	0.529787	0.22172	0.963867	1	0.732232	1	25.8	23.8	47.8	84.8	262.2	155.7	30.5	13.4	18.6	17.1	19.8	14.8	136.6	17.4	34.4	467.2	61	22.5	362.8	34.6	188.6	224.5	24.3	112	3228.09	1420.43	1965.07	1811.61
[R].KFGDPVVQSDMK.[H]	1xBiotin [K1]; 1xOxidation [M11]	2	19	P0DMV9	P0DMV9 [77-88]	P0DMV9 1xBiotin [K77]	Heat shock 70 kDa protein 1B OS=Homo sapiens OX=9606 GN=HSPA1B PE=1 SV=1	1	1592.74	0.453	10.82	0.433	-1.14	3.44	-1.21	1	0.243538	0.998481	1	0.774103	1	172.3	9.1	169.2	78	98.2	73.2	314.4	191.4	10.7	6.8	13.2	10.1	7.4	187.9	217.6	68.5	86.6	107.6	49.5	109.7	109.1	68.7	159.5	81.4	91188.6	55513.6	3099.34	1978.34
[K].KDVDEAYMNK.[V]	1xBiotin [K1]; 1xOxidation [M8]	2	5	P05787	P05787 [198-207]	P05787 1xBiotin [K198]	Keratin, type II cytoskeletal 8 OS=Homo sapiens OX=9606 GN=KRT8 PE=1 SV=7	1	1454.63	3.433	10.288	5.126	1.78	3.36	2.36	0.238925	0.00377572	0.017219	0.913938	0.0291616	0.110516	29	29.6	22.5	99.6	304.2	115.1	25.5	49.8	26.1	51.3	20.6	26.6	19.9	26.9	20.2	41.4	89.4	180.7	110.1	273.2	463.5	103.4	180.9	90.6	1951.79	3808.14	1993.23	3924.86
[K].GLECNFGASSTALKGICR.[A]	1xBiotin [K14]; 2xCarbamidomethyl [C4; C17]	1	23	O00622	O00622 [75-92]	O00622 1xBiotin [K88]	CCN family member 1 OS=Homo sapiens OX=9606 GN=CCN1 PE=1 SV=1	1	2167.01	2.084	10.067	3.772	1.06	3.33	1.92	0.804343	0.233231	0.830762	1	0.757576	1	43.5	20.6	49.9	90.7	207.1	188.2	77.8	23.5	35.4	142.9	16.7	13.1	186.3	40.6	34.4	152.2	73.7	65.1	168.3	86	222.8	234.5	73.7	153	13856.7	4181.32	6302.21	25455.3
[R].VEKPTCANGYPAVK.[V]	1xBiotin [K14]; 1xCarbamidomethyl [C6]	1	2	P98088	P98088 [4891-4904]	P98088 1xBiotin [K4904]	Mucin-5AC OS=Homo sapiens OX=9606 GN=MUC5AC PE=1 SV=4	0	1759.85	3.387	9.812	3.255	1.76	3.29	1.7	0.894386	0.423448	0.999984	1	1	1	35.1	25.1	40.9	118.9	246.8	133.2	96.3	25.9	37.3	72.4	15.4	26.7	77.1	43.5	38.8	179.9	126.4	73.5	263.6	93.8	262.3	222.8	2.7	141.6	52975.2	14265.6	20535.8	39852.8
[R].KLEAAR.[A]	1xBiotin [K1]	2	1	P10321	P10321 [170-175]	P10321 1xBiotin [K170]	HLA class I histocompatibility antigen, C alpha chain OS=Homo sapiens OX=9606 GN=HLA-C PE=1 SV=3	1	913.492	1.932	9.665	0.5	0.95	3.27	-1	0.0480976	6.40441e-05	0.0877571	0.261018	0.000854988	0.414627	37.3	16.7	208.1	72	161.7	104.2	34.3	14.2	34.1	14.9	15.5	15.3	374.9	152.9	190.5	42.2	65.9	121	129.9	148	173.4	79.4	98.2	95.3	4086.54	1685.6	4064.08	1772.04
[K].KVPQVSTPTLVEVSR.[N]	1xBiotin [K1]	3	7	P02768	P02768 [438-452]	P02768 1xBiotin [K438]	Albumin OS=Homo sapiens OX=9606 GN=ALB PE=1 SV=2	1	1866.02	1.212	9.564	2.45	0.28	3.26	1.29	0.480669	0.00017208	0.0509141	1	0.00191438	0.274074	75.7	21.9	58.3	91.8	209.3	142.9	25.6	75.3	92.4	13.8	21.8	30.3	63.8	47	58	90.4	121.4	91.3	126.8	240	208.2	142.1	223.9	127.7	4691.72	13809.6	16944.6	2530.59
[R].GALQNIIPASTGAAKAVGK.[V]	1xBiotin [K]	2	10	P04406	P04406 [201-219]	P04406 1xBiotin [K]	Glyceraldehyde-3-phosphate dehydrogenase OS=Homo sapiens OX=9606 GN=GAPDH PE=1 SV=3	1	1993.09	4.788	9.015	2.462	2.26	3.17	1.3	0.480021	0.302679	0.632527	1	0.903974	1	27.3	20.1	69.7	130.7	180.8	171.5	77.9	21.2	23.8	120.4	13.6	17.5	102.3	60.7	13.9	268.3	114	58.2	236.9	74.5	157.6	222	67.5	149.6	13319.3	3620.37	4069.4	20579.7
[K].AKGILFVGSGVSGGEEGAR.[Y]	1xBiotin [K2]	2	12	P52209	P52209 [118-136]	P52209 1xBiotin [K119]	6-phosphogluconate dehydrogenase, decarboxylating OS=Homo sapiens OX=9606 GN=PGD PE=1 SV=3	1	2017.02	3.034	8.957	7.903	1.6	3.16	2.98	0.0349446	0.000236617	0.000141438	0.200332	0.00242987	0.00174833	43.1	21.7	23.6	130.7	194.7	186.3	34.7	48.1	41.5	43.5	21	20.3	16.8	22.7	47.8	146.2	126	78.8	139.1	187.7	218.5	162.6	264.9	179.6	2920.04	4047.42	3497.7	3664.66
[R].AYSLKVEAANVHIDPK.[F]	1xBiotin [K5]	2	6	P55287	P55287 [342-357]	P55287 1xBiotin [K346]	Cadherin-11 OS=Homo sapiens OX=9606 GN=CDH11 PE=1 SV=2	1	1981.02	7.641	8.947	9.711	2.93	3.16	3.28	9.59311e-05	0.000176397	5.47642e-05	0.00116425	0.0019462	0.000753714	21.6	21.3	18.8	165.1	190.6	182.5	26.9	21.8	14.6	14.2	32.4	21.5	15.6	20.1	18.9	300.2	166.4	106.9	192.1	101.5	213.5	183.9	139.4	210.1	3428.14	2774.37	1859.91	1805.51
[K].VIQGCGNPKVNPQGPGPEEK.[R]	1xBiotin [K]; 1xCarbamidomethyl [C5]	1	4	P35052	P35052 [339-358]	P35052 1xBiotin [K]	Glypican-1 OS=Homo sapiens OX=9606 GN=GPC1 PE=1 SV=2	1	2331.12	25.948	8.947	17.53	4.7	3.16	4.13	4.83477e-07	1.24486e-05	3.73011e-06	1.84412e-05	0.000234069	0.000105951	10.8	14.3	9	280	128.1	157.8	10.8	8.3	18.1	19.5	14.3	7	8.7	9	14.1	241.1	332.1	279.5	127.9	154.9	114	110.3	173	157.6	2211.1	1710.85	3705.43	4000.01
[R].VAPEEHPVLLTEAPLNPKANR.[E]	1xBiotin [K18]	2	22	P60709	P60709 [96-116]	P60709 1xBiotin [K113]	Actin, cytoplasmic 1 OS=Homo sapiens OX=9606 GN=ACTB PE=1 SV=1	1	2521.32	1.702	8.454	1.342	0.77	3.08	0.42	0.690887	0.0037041	0.950154	1	0.0289316	1	89.3	17.7	81.7	152	149.7	109.6	81.3	59	85.9	76.3	11.2	16.1	90.4	73.2	74.3	162.7	99.3	138.3	230.8	136.2	127.7	89.3	99.8	148.3	14027.5	10183.3	14825.3	13162.4
[R].SNDPKSQNHPGWLMR.[G]	1xBiotin [K5]	2	3	P06213	P06213 [567-581]	P06213 1xBiotin [K571]	Insulin receptor OS=Homo sapiens OX=9606 GN=INSR PE=1 SV=4	1	1992.92	5.777	8.339	3.469	2.53	3.06	1.79	1.30385e-06	2.66347e-07	0.00015744	4.14438e-05	1.35239e-05	0.00191074	38.2	22.5	29.3	220.9	187.3	101.8	22.8	36.7	39.5	26	19.7	21.6	28.2	27.9	35	212.2	195	227.5	280.8	148.5	180	86.8	97.8	114	2135.83	3442.85	3701.8	2440.47
[R].FIINDWVKTHTK.[G]	1xBiotin [K]	2	6	P05121	P05121 [157-168]	P05121 1xBiotin [K]	Plasminogen activator inhibitor 1 OS=Homo sapiens OX=9606 GN=SERPINE1 PE=1 SV=1	1	1727.89	1.447	7.742	2.15	0.53	2.95	1.1	0.999543	0.243182	0.903804	1	0.774103	1	60.9	22.1	81.8	88.2	171.2	175.9	162.5	29.9	50.6	122.6	18.3	15	137.8	52.2	67.9	141.8	73.2	40.8	207.5	77.2	142	222.7	91.9	145.9	16313.5	3003.95	5075.81	12306.8
[K].MLETKWSLLQQQK.[T]	1xBiotin [K5]	2	14	P05787	P05787 [118-130]	P05787 1xBiotin [K122]	Keratin, type II cytoskeletal 8 OS=Homo sapiens OX=9606 GN=KRT8 PE=1 SV=7	1	1858.96	5.41	7.672	6.434	2.44	2.94	2.69	0.716566	0.516429	0.962505	1	1	1	17.8	21.7	40.1	96.2	166.5	257.7	116.7	14.4	10.1	88.4	13.6	17.6	238.8	32.5	26	199.4	78.2	42	272	54.9	135.2	215.9	34.8	209.3	24036.4	2974.98	2082.78	18209
[K].EDAMKTK.[T]	1xBiotin [K5]; 1xOxidation [M4]	3	9	Q29983	Q29983 [171-177]	Q29983 1xBiotin [K175]	MHC class I polypeptide-related sequence A OS=Homo sapiens OX=9606 GN=MICA PE=1 SV=1	1	1064.48	10.738	7.278	6.769	3.42	2.86	2.76	8.30473e-07	3.08067e-06	1.12934e-05	2.84277e-05	7.21526e-05	0.00022244	21.2	20.2	23.6	228	147.1	159.8	18.7	16.4	22.3	17.8	21.8	10.9	23	14.3	20.8	200.7	196.6	346.1	129.5	216.3	127.2	119.2	157.8	140.7	3102.77	2724.18	3705.76	2954
[R].SWTAADMAAQITKR.[K]	1xBiotin [K13]; 1xOxidation [M7]	3	14	P04439	P04439 [156-169]	P04439 1xBiotin [K168]	HLA class I histocompatibility antigen, A alpha chain OS=Homo sapiens OX=9606 GN=HLA-A PE=1 SV=2	1	1791.85	3.255	7.168	2.806	1.7	2.84	1.49	0.357257	0.0131693	0.292199	1	0.085345	1	37.3	29.7	52.3	121.4	212.7	146.6	121.4	36	31.1	85.7	27.7	28.7	66.1	42.3	50.5	143.9	83.5	117.3	145.4	205.6	242.5	141.7	146.8	83.5	12807.3	3804.31	3280.48	9044.94
[-].MKFVYK.[E]	1xBiotin [K2]	1	9	O95166	O95166 [1-6]	O95166 1xBiotin [K2]	Gamma-aminobutyric acid receptor-associated protein OS=Homo sapiens OX=9606 GN=GABARAP PE=1 SV=1	1	1041.53	25.936	7.064	8.868	4.7	2.82	3.15	2.07397e-05	0.00315784	0.000342017	0.000300951	0.0255498	0.00378838	7.2	25.7	20	187.4	181.8	177.7	6.7	25.3	4.7	23.8	46.7	22.5	15.4	19.9	18.5	173.1	234.1	165.9	187.1	155.5	167.9	131.5	164.1	237.2	2990.36	11345.3	2101.19	10649.8
[R].SWTAADMAAQITKR.[K]	1xBiotin [K13]	3	14	P04439	P04439 [156-169]	P04439 1xBiotin [K168]	HLA class I histocompatibility antigen, A alpha chain OS=Homo sapiens OX=9606 GN=HLA-A PE=1 SV=2	1	1775.86	0.557	6.927	6.523	-0.84	2.79	2.71	0.999151	0.519929	0.815662	1	1	1	132.9	16.9	34.4	74	117.4	224.3	155.4	17	110.3	77.1	8.5	14.1	121.3	28.5	24.4	303.6	61.4	37.9	237.8	35.4	97.4	240.4	43.1	186.2	27964.5	3066.86	19860.2	13885.9
[K].GQPLCVLSAMKMETVVTSPMEGTVR.[K]	1xBiotin [K11]; 1xCarbamidomethyl [C5]; 1xOxidation [M]	1	26	P11498	P11498 [1134-1158]	P11498 1xBiotin [K1144]	Pyruvate carboxylase, mitochondrial OS=Homo sapiens OX=9606 GN=PC PE=1 SV=2	1	2963.42	1.412	6.884	4.102	0.5	2.78	2.04	0.995371	0.635527	0.997328	1	1	1	60.5	32.9	38.2	85.5	226.2	156.7	63.8	15.5	7.6	10.3	6.9	8.4	414.8	9.5	9.8	536.1	21.9	4.6	249.3	19.7	57.9	306.2	40.1	17.9	26602.2	6459.51	3172.38	4286.61
[K].YKASITALEAK.[I]	1xBiotin [K2]	2	5	P35579	P35579 [1805-1815]	P35579 1xBiotin [K1806]	Myosin-9 OS=Homo sapiens OX=9606 GN=MYH9 PE=1 SV=4	1	1420.75	2.347	6.848	2.6	1.23	2.78	1.38	0.299721	0.11124	0.406581	1	0.45835	1	53.9	29.2	52.9	126.6	199.7	137.7	46.7	93.7	21.2	25.2	105.7	21.5	45.8	94.1	19	235.2	104.8	109.6	112.7	172.8	233.9	104.1	134.8	119.1	3865.89	7764.28	1756.56	2090.27
[-].MKFVYK.[E]	1xBiotin [K2]; 1xOxidation [M1]	1	4	O95166	O95166 [1-6]	O95166 1xBiotin [K2]	Gamma-aminobutyric acid receptor-associated protein OS=Homo sapiens OX=9606 GN=GABARAP PE=1 SV=1	1	1057.52	5.48	6.845	8.87	2.45	2.77	3.15	0.0205813	0.003779	0.00250506	0.124326	0.0291616	0.0214375	30.3	22.5	23	166.1	153.9	204.2	22	35.4	28.9	21.3	21.4	35.3	8.2	21.9	55.1	88.9	158.3	178.5	319.2	146.7	132.2	133.8	194.6	198.2	5879.32	9464.84	7722.05	5694.6
[R].DLYDAGVKR.[K]	1xBiotin [K8]	2	3	P07355	P07355 [197-205]	P07355 1xBiotin [K204]	Annexin A2 OS=Homo sapiens OX=9606 GN=ANXA2 PE=1 SV=2	1	1262.62	4.981	6.787	2.534	2.32	2.76	1.34	0.0381217	0.0211679	0.979195	0.214736	0.129629	1	26.6	20.7	79.1	132.4	140.8	200.4	24.1	32.1	17.7	18.8	17.7	29.8	76.1	45.4	71.6	119.5	120	241.1	88.3	384.4	127.5	22.3	182.1	181.5	3100.19	4138.73	2274.94	2418.73
[R].HLYKELMGPWNK.[D]	1xBiotin [K4]; 1xOxidation [M7]	2	26	P05121	P05121 [100-111]	P05121 1xBiotin [K103]	Plasminogen activator inhibitor 1 OS=Homo sapiens OX=9606 GN=SERPINE1 PE=1 SV=1	1	1757.85	1.79	6.754	1.625	0.84	2.76	0.7	0.796792	0.0554527	0.996587	1	0.276229	1	54	34.1	70.4	96.7	230.4	114.4	63.4	35.6	42.7	90.9	5.8	27	169.8	43.7	55.7	221.5	59.7	76.4	182.2	139.1	252.2	185.5	58.3	90.5	15722.2	8828.72	10588	22531.7
[K].KELASALK.[S]	1xBiotin [K1]	3	1	P07355	P07355 [81-88]	P07355 1xBiotin [K81]	Annexin A2 OS=Homo sapiens OX=9606 GN=ANXA2 PE=1 SV=2	1	1085.6	10.05	6.719	1.996	3.33	2.75	1	0.00164362	0.00254983	0.126897	0.0138002	0.0212751	0.555415	13.9	24.8	84.9	140	166.8	169.5	12.2	13.4	24.3	23.9	29.9	15.1	17.5	116	81.7	134.6	121.7	162.8	202.1	160.4	159.2	119	163	243.3	1447.43	1584.9	2875.88	2824.07
[R].WKEATIPGHLNSYTIK.[G]	1xBiotin [K2]	15	2	P02751	P02751 [654-669]	P02751 1xBiotin [K655]	Fibronectin OS=Homo sapiens OX=9606 GN=FN1 PE=1 SV=5	1	2084.06	0.756	6.707	0.439	-0.4	2.75	-1.19	0.999495	0.0746547	0.671969	1	0.346056	1	69	47.9	76	52.2	321.4	33.4	80.5	88	55.6	78.2	43.7	55.9	88.7	60.1	93.2	82.6	60.9	53.6	375.2	57.9	394.6	39	37.8	54.2	3296.01	3600.9	2277.47	3201.12
[K].LFGTSGQKTK.[I]	1xBiotin [K]	3	25	P00533	P00533 [480-489]	P00533 1xBiotin [K]	Epidermal growth factor receptor OS=Homo sapiens OX=9606 GN=EGFR PE=1 SV=2	1	1292.67	1.83	6.626	1.716	0.87	2.73	0.78	0.623317	0.000984116	0.533339	1	0.00870062	1	82.4	21.1	75.7	150.8	140.1	129.9	102.2	60	78.8	3.6	20.2	24	80.1	55.2	72.5	113.3	208.2	144.3	134	155.6	101.9	98.8	223.1	124.3	55724.8	32728.6	42996.5	1969.69
[K].YKMNLYGFHGGQR.[MV]	1xBiotin [K2]; 1xOxidation [M3]	3	5	P22105-1	P22105-1 [2051-2063]; [2258-2270]; [2367-2379]; [2692-2704]; [2906-2918]; [3122-3134]	P22105-1 1xBiotin [K2052]; 1xBiotin [K2259]; 1xBiotin [K2368]; 1xBiotin [K2693]; 1xBiotin [K2907]; 1xBiotin [K3123]	Isoform 3 of Tenascin-X OS=Homo sapiens OX=9606 GN=TNXB	1	1812.83	1.996	6.622	1.291	1	2.73	0.37	0.780544	0.209187	0.997414	1	0.69991	1	61.2	24.4	100.8	122.1	161.5	130.1	14.8	69.5	94.6	16.9	27.7	73.8	153.7	114.5	76.2	41	189.4	138.6	97	183.4	185.4	27.2	148.3	147.8	1976.22	9248.6	12595.5	2255.49
[R].ISVYYNEATGGKYVPR.[A]	1xBiotin [K12]	1	22	P07437	P07437 [47-62]	P07437 1xBiotin [K58]	Tubulin beta chain OS=Homo sapiens OX=9606 GN=TUBB PE=1 SV=2	1	2043	1.176	6.601	1.943	0.23	2.72	0.96	0.973186	0.166086	0.972335	1	0.596034	1	100.7	21.1	75	118.4	139.1	145.8	111.1	21.5	92.7	129	11.4	19.4	169.1	69.1	57.6	131.1	109	55.4	164.5	126.7	128.1	134.2	145.5	124.6	23563.3	4548.92	19650	27348.7
[R].TGLIKGSGTAEVELK.[K]	1xBiotin [K5]	3	12	P14618	P14618 [121-135]	P14618 1xBiotin [K125]	Pyruvate kinase PKM OS=Homo sapiens OX=9606 GN=PKM PE=1 SV=4	1	1728.92	0.948	6.544	1.257	-0.08	2.71	0.33	0.981134	0.046707	0.917831	1	0.241007	1	107.7	25.3	88.4	102.1	165.4	111.2	32.6	110.7	111.9	26	101.9	24.1	90.9	100	46.1	104.9	62.5	144.1	205.9	170.1	130.2	103.8	120	114.3	2599.86	8839.25	8937.35	2075.59
[R].SKYKPTPIPIK.[V]	1xBiotin [K2]	1	9	Q14126	Q14126 [366-376]	Q14126 1xBiotin [K367]	Desmoglein-2 OS=Homo sapiens OX=9606 GN=DSG2 PE=1 SV=2	1	1497.85	6.73	6.314	10.625	2.75	2.66	3.41	3.96915e-06	6.34599e-06	7.13204e-07	9.14921e-05	0.000130337	2.9754e-05	26	24.1	19.2	174.7	152.3	203.7	25.5	18.6	29.3	19.7	23.7	24.2	12.9	19.5	18.8	128.6	171.5	278.3	143.6	149.5	179.6	131.2	225.6	200	10165	7401.75	11689.8	7875.24
[R].FFNIAKDPR.[V]	1xBiotin [K6]	13	1	O94856	O94856 [81-89]	O94856 1xBiotin [K86]	Neurofascin OS=Homo sapiens OX=9606 GN=NFASC PE=1 SV=4	1	1333.67	1.508	6.219	2.038	0.59	2.64	1.03	0.857213	0.0091512	0.41504	1	0.0620145	1	72.2	28.2	70.9	108.8	175.4	144.5	65.9	45	81.1	75.8	18.8	25.8	64.8	45.3	78.1	99.4	64.6	137.9	311.2	160.2	111	82	132	201.2	5439.19	3710.86	6690.35	6252.89
[R].LIGDAAKNQVALNPQNTVFDAK.[R]	1xBiotin [K7]	2	16	P0DMV9	P0DMV9 [50-71]	P0DMV9 1xBiotin [K56]	Heat shock 70 kDa protein 1B OS=Homo sapiens OX=9606 GN=HSPA1B PE=1 SV=1	1	2553.31	0.565	6.145	0.657	-0.82	2.62	-0.61	0.977711	0.849458	0.865398	1	1	1	121.2	21.9	153	68.5	134.9	100.5	290.1	51.7	82.8	217.3	15	9	282.4	104.5	78.2	131.5	46.8	38	120.1	40.9	92.1	108.9	21.9	68.6	62005.8	11042.6	17701.1	46447.8
[R].IKTSDVTSTK.[G]	1xBiotin [K2]	1	11	P26196	P26196 [85-94]	P26196 1xBiotin [K86]	Probable ATP-dependent RNA helicase DDX6 OS=Homo sapiens OX=9606 GN=DDX6 PE=1 SV=2	1	1305.67	6.726	6.106	4.292	2.75	2.61	2.1	0.000856323	0.00387269	0.0108884	0.00767243	0.0295431	0.0765051	24.1	27.5	41.2	162.1	168	177	8	22	26.7	15	26.4	25.1	9.5	41.2	37.7	148	133.4	363	147	201.4	153.4	114.2	161.6	166.3	2441.72	6693.79	8118.95	4550.49
[R].VKYETELAMR.[Q]	1xBiotin [K2]; 1xOxidation [M9]	1	5	P05783	P05783 [166-175]	P05783 1xBiotin [K167]	Keratin, type I cytoskeletal 18 OS=Homo sapiens OX=9606 GN=KRT18 PE=1 SV=2	1	1481.71	2.176	6.009	3.89	1.12	2.59	1.96	0.330882	0.0327811	0.0311104	1	0.182731	0.181364	60.1	23	50.7	130.7	138.2	197.3	61.8	60.7	48	15.2	56.8	23.2	28.6	51.2	64.5	70.6	132	236.9	65.6	139.5	150.8	269.8	199.2	125.3	11094.3	10881.6	8618.99	2735.16
[K].AGDSLMVMIAMKMEHTIK.[S]	1xBiotin [K]; 2xOxidation [M]	1	86	Q96RQ3	Q96RQ3 [670-687]	Q96RQ3 1xBiotin [K]	Methylcrotonoyl-CoA carboxylase subunit alpha, mitochondrial OS=Homo sapiens OX=9606 GN=MCCC1 PE=1 SV=3	1	2264.06	1.317	5.961	1.598	0.4	2.58	0.68	0.99973	0.686359	0.943868	1	1	1	47.3	44.2	70.4	62.3	263.3	112.5	154.2	11.3	29.3	9.8	31.2	27.4	352	43.6	1.3	291.5	38.6	12.8	238.8	55.3	163.1	236.3	69.7	33.7	202237	14835.2	38468.5	12801.9
[R].INVYYNEATGGKYVPR.[A]	1xBiotin [K12]	1	17	P68371	P68371 [47-62]	P68371 1xBiotin [K58]	Tubulin beta-4B chain OS=Homo sapiens OX=9606 GN=TUBB4B PE=1 SV=1	1	2070.01	2.364	5.908	1.555	1.24	2.56	0.64	0.999913	0.62298	0.996433	1	1	1	45.3	25.1	107.3	107.1	148.3	166.8	166	36.5	37.1	173.9	18.7	20.6	186.3	87.9	53.6	163.7	87.8	23.9	124.4	97.3	121.6	169.4	136.7	94.6	17509.6	3852.52	3917.37	18343.1
[K].YNNDKSR.[D]	1xBiotin [K5]	16	6	P26599	P26599 [267-273]	P26599 1xBiotin [K271]	Polypyrimidine tract-binding protein 1 OS=Homo sapiens OX=9606 GN=PTBP1 PE=1 SV=1	1	1122.5	4.246	5.867	6.722	2.09	2.55	2.75	0.000139688	9.9428e-05	9.7036e-05	0.00163582	0.00121777	0.0012221	33	26.7	31.5	140	156.7	212.1	26.5	31.5	29.4	31.6	23.8	23.5	28.1	38.8	25.1	323.3	100.6	124.8	137.4	182.8	139.7	193.6	189	150.6	3192.88	3792.07	3544.95	3806.48
[K].FAGDKGYLTK.[E]	1xBiotin [K5]	1	3	P60903	P60903 [19-28]	P60903 1xBiotin [K23]	Protein S100-A10 OS=Homo sapiens OX=9606 GN=S100A10 PE=1 SV=2	1	1325.66	2.809	5.811	2.789	1.49	2.54	1.48	0.0372546	0.00188435	0.104425	0.211848	0.0161257	0.479064	52.9	24.9	60.4	148.7	144.7	168.5	26.2	52.1	108.1	24.5	22.7	44.3	59.5	65	50.4	146.4	138.5	181	142.4	141.4	157.1	90	165.9	184.4	2068.72	4113.35	8534.21	1934.85
[R].THVPKGWIK.[G]	1xBiotin [K5]	2	5	O95084	O95084 [227-235]	O95084 1xBiotin [K231]	Serine protease 23 OS=Homo sapiens OX=9606 GN=PRSS23 PE=1 SV=1	1	1291.7	1.961	5.659	3.236	0.97	2.5	1.69	0.320409	0.0407846	0.381872	1	0.217789	1	55.9	22.3	67.6	109.6	126	218.7	21.3	75.7	57.1	22.8	14.2	64.3	55.7	69.1	115.2	112	85.6	149.6	103.1	129.6	128.8	93.3	279.1	223.5	3197.04	11355.1	8566.06	3414.09
[R].TGLKITSLTEVVCGLDLCNQGNSGR.[A]	1xBiotin [K4]; 2xCarbamidomethyl [C13; C18]	3	7	Q03405	Q03405 [81-105]	Q03405 1xBiotin [K84]	Urokinase plasminogen activator surface receptor OS=Homo sapiens OX=9606 GN=PLAUR PE=1 SV=1	1	2918.42	4.157	5.642	1.931	2.06	2.5	0.95	0.645328	0.969368	0.835339	1	1	1	45.3	38.5	37.6	188.4	217.4	72.7	27.3	23	35.1	23.2	15.8	191.1	36.6	13.6	22.7	629.7	113.5	21.2	207.4	20.7	130.9	213.1	31.3	43.8	2847.85	2402.19	3662.94	2421.44
[R].NQGTPKYKPR.[F]	1xBiotin [K6]	1	2	Q8IWU6	Q8IWU6 [527-536]	Q8IWU6 1xBiotin [K532]	Extracellular sulfatase Sulf-1 OS=Homo sapiens OX=9606 GN=SULF1 PE=1 SV=1	1	1414.73	2.831	5.575	3.863	1.5	2.48	1.95	0.0101964	0.00207777	0.0229925	0.0680607	0.0175559	0.140802	51.3	34.8	35.9	145.1	194.1	138.8	27.1	54	49.1	33.4	59.6	20.7	34.4	23.6	72.5	131.6	139.1	222.6	150.7	186	207.4	109.1	146.2	133	2051.62	4097.13	3725.05	2529.77
[-].MSKSESPKEPEQLR.[K]	1xBiotin [K3]; 1xMet-loss+Acetyl [N-Term]	3	2	P09651	P09651 [1-14]	P09651 1xBiotin [K3]; 1xMet-loss+Acetyl [N-Term]	Heterogeneous nuclear ribonucleoprotein A1 OS=Homo sapiens OX=9606 GN=HNRNPA1 PE=1 SV=5	2	1782.87	2.287	5.568	4.817	1.19	2.48	2.27	0.933624	0.153844	0.363236	1	0.562689	1	57.6	30.6	36.1	131.7	170.2	173.9	65.5	51.2	64.4	34.2	59.7	26	40.4	38.8	53.8	23.7	147.2	263.7	98.1	190.3	190.7	56	202	194.5	4182.67	3266.99	4110.96	2183.04
[R].KVCNGIGIGEFK.[D]	1xBiotin [K1]; 1xCarbamidomethyl [C3]	4	6	P00533	P00533 [335-346]	P00533 1xBiotin [K335]	Epidermal growth factor receptor OS=Homo sapiens OX=9606 GN=EGFR PE=1 SV=2	1	1547.77	3.526	5.525	4.666	1.82	2.47	2.22	0.314506	0.204548	0.880185	1	0.689708	1	47.3	26	38.1	166.9	143.7	177.9	21.5	32.2	34.8	13.2	25.4	17.7	549.8	15.3	25.9	177.6	98.4	113.5	116.7	97.7	79.1	100.3	121	159.8	2340.93	3497.93	3776.63	1434.15
[R].GHDQYAYDGKDYIALNEDLR.[S]	1xBiotin [K10]	1	6	P01889	P01889 [136-155]	P01889 1xBiotin [K145]	HLA class I histocompatibility antigen, B alpha chain OS=Homo sapiens OX=9606 GN=HLA-B PE=1 SV=3	1	2582.16	0.961	5.454	2.491	-0.06	2.45	1.32	0.994087	0.724876	0.997465	1	1	1	52	51.1	48.2	50	278.6	120	76.1	24	15.1	24.2	23.6	18.7	349.8	22.3	16.3	290.2	23.1	20.8	402.2	16	128.7	259.7	34	55.4	8094.38	2558.2	1603.01	2576.69
[K].LKPEDITQIQPQQLVLR.[L]	1xBiotin [K2]	5	11	P05556	P05556 [106-122]	P05556 1xBiotin [K107]	Integrin beta-1 OS=Homo sapiens OX=9606 GN=ITGB1 PE=1 SV=2	0	2245.24	1.556	5.39	2.845	0.64	2.43	1.51	0.990167	0.797224	0.998331	1	1	1	53.6	35.7	61.1	83.4	192.4	173.8	172.2	27.2	45.4	187	20.5	30.2	127.8	43.4	51.7	209.7	70.6	51.1	198.3	55.9	163	147.2	27	171.7	11895.8	1881.34	3136.38	12916.7
[K].YKMHLYGLHEGR.[R]	1xBiotin [K2]; 1xOxidation [M3]	3	2	P22105-1	P22105-1 [2159-2170]; [2475-2486]; [2586-2597]; [2800-2811]	P22105-1 1xBiotin [K2160]; 1xBiotin [K2476]; 1xBiotin [K2587]; 1xBiotin [K2801]	Isoform 3 of Tenascin-X OS=Homo sapiens OX=9606 GN=TNXB	1	1745.83	1.099	5.359	1.432	0.14	2.42	0.52	0.997011	0.0851975	0.913384	1	0.382959	1	99.4	28.5	86.5	109.2	152.5	123.9	140.1	94.2	105.5	30.2	27.7	90.9	32.2	92.6	91.8	126.2	115.9	53.9	114.7	186.9	161.8	45.7	131.5	158	10171.1	6836.98	7655.58	2191.18
[K].YKMHLYGLHEGQR.[V]	1xBiotin [K2]; 1xOxidation [M3]	3	3	P22105-1	P22105-1 [1436-1448]; [3014-3026]; [3228-3240]	P22105-1 1xBiotin [K1437]; 1xBiotin [K3015]; 1xBiotin [K3229]	Isoform 3 of Tenascin-X OS=Homo sapiens OX=9606 GN=TNXB	1	1873.88	2.006	5.135	1.282	1	2.36	0.36	0.473724	0.00721561	0.999202	1	0.0506992	1	63.9	37.2	78.7	128.3	191	100.9	38.4	59.2	76.8	34.5	15.9	95.3	116.6	72.9	63.4	118.8	81.7	138.1	151	282.9	177	99.3	93.4	84.7	3904.5	6022.54	7810.24	3504.56
[K].VFVRPTNSCMKTIGVHDR.[V]	1xBiotin [K11]; 1xCarbamidomethyl [C9]	1	3	P52803	P52803 [156-173]	P52803 1xBiotin [K166]	Ephrin-A5 OS=Homo sapiens OX=9606 GN=EFNA5 PE=1 SV=1	1	2343.15	8.073	4.955	4.522	3.01	2.31	2.18	9.32232e-06	0.000298732	7.1193e-05	0.00016818	0.00295413	0.000931791	31.7	29.3	25	255.8	145.3	112.9	29.8	25.5	27.5	26	25	25.5	22	17.7	21.7	175.8	222.4	401.2	126.3	109.9	128.8	98.2	84.3	232.4	3134.6	2677.99	2896.63	2729.81
[R].KVQFLGK.[K]	1xBiotin [K1]	2	1	P0DI82	P0DI82 [129-135]	P0DI82 1xBiotin [K129]	Trafficking protein particle complex subunit 2B OS=Homo sapiens OX=9606 GN=TRAPPC2B PE=1 SV=1	1	1045.59	3.164	4.934	2.97	1.66	2.3	1.57	0.0193563	0.00237148	0.0301485	0.119082	0.0199115	0.176527	44.5	35.9	50.8	140.7	177.1	151	47.1	40.5	43.2	34.9	65	20.7	47.2	49.4	53.3	97.4	136.7	191	121.5	172.1	210.5	88.6	146.7	234.2	3486.83	2997.51	3197.49	2579.64
[R].LGVKGVLFQPCER.[T]	1xBiotin [K4]; 1xCarbamidomethyl [C11]	1	13	Q07954	Q07954 [2650-2662]	Q07954 1xBiotin [K2653]	Prolow-density lipoprotein receptor-related protein 1 OS=Homo sapiens OX=9606 GN=LRP1 PE=1 SV=2	1	1728.89	7.513	4.931	4.08	2.91	2.3	2.03	5.41785e-06	6.02201e-05	5.0016e-05	0.000118202	0.000812059	0.000696895	28.6	33.1	31.5	214.9	163.2	128.6	35	27.5	17.5	23.9	31.9	38	19.3	37.1	30.4	206.9	185.6	214.3	155.4	157.1	160.7	121.1	123.8	214.5	3090.07	2433.45	1542.31	2115.96
[K].GHDVTFYKTWYR.[S]	1xBiotin [K8]	1	5	Q9H7M9	Q9H7M9 [63-74]	Q9H7M9 1xBiotin [K70]	V-type immunoglobulin domain-containing suppressor of T-cell activation OS=Homo sapiens OX=9606 GN=VSIR PE=1 SV=3	1	1798.84	1.315	4.861	1.665	0.4	2.28	0.74	0.898208	0.529339	0.999393	1	1	1	50.9	55.6	58.5	66.9	270.5	97.5	59.7	41.4	36.5	48.6	41.3	45.3	235.9	47.7	41.8	211.3	52.7	54.5	284.1	36.6	220.3	212	50.8	79.4	3867.65	2684.54	2367.66	3146.85
[K].SKMIYASSK.[D]	1xBiotin [K2]	5	2	P23528	P23528 [113-121]	P23528 1xBiotin [K114]	Cofilin-1 OS=Homo sapiens OX=9606 GN=CFL1 PE=1 SV=3	1	1240.61	3.404	4.828	0.925	1.77	2.27	-0.11	0.256901	0.879957	0.999992	0.952674	1	1	39	30.7	129.5	132.7	148.3	119.8	44.9	25.7	36.8	24.8	29	182.7	168	122.1	96	67.3	194.9	125.1	159.3	139.8	32.2	108.3	130.2	113	2592.42	1486.55	2123.19	1432.25
[R].AKEAQDDLVK.[T]	1xBiotin [K2]	1	3	P15311	P15311 [449-458]	P15311 1xBiotin [K450]	Ezrin OS=Homo sapiens OX=9606 GN=EZR PE=1 SV=4	1	1342.67	1.931	4.816	2.437	0.95	2.27	1.28	0.127392	0.000422276	0.0212781	0.578466	0.00394767	0.132122	72.6	34.9	53.6	140.2	168.2	130.5	68.7	71.3	61.4	30.6	66.3	33	38.2	50.9	50.7	122.1	134.2	132.6	121.8	306.9	159.1	87.8	123.5	141	4007.63	4157.95	3584.72	1784.11
[R].MQKEITALAPSTMK.[I]	1xBiotin [K3]	7	6	P60709	P60709 [313-326]	P60709 1xBiotin [K315]	Actin, cytoplasmic 1 OS=Homo sapiens OX=9606 GN=ACTB PE=1 SV=1	1	1774.89	1.67	4.791	2.273	0.74	2.26	1.18	0.694483	0.204196	0.424457	1	0.689708	1	60.5	40.1	63	101.1	192	143.3	91.7	36.3	48.6	196.9	21.9	32.2	55	50.6	35.5	201.3	81.2	79.1	154.1	130.9	235.7	119.1	115	115	155688	61594.7	82524.7	334415
[K].YEELQSLAGKHGDDLR.[R]	1xBiotin [K10]	2	19	P05787	P05787 [286-301]	P05787 1xBiotin [K295]	Keratin, type II cytoskeletal 8 OS=Homo sapiens OX=9606 GN=KRT8 PE=1 SV=7	1	2056.98	1.603	4.678	3.263	0.68	2.23	1.71	0.470614	0.0180459	0.233269	1	0.112576	0.900043	71.7	38.2	46.1	114.9	178.8	150.3	114.8	37.1	67.8	79.6	24.4	36.2	83.7	38.9	43.6	182.6	108.7	102.6	169.2	134.6	200.6	151.6	81.6	142.3	43965.9	14191.4	25976	30468.2
[K].LLETKWTLLQEQK.[S]	1xBiotin [K5]	1	13	P08729	P08729 [118-130]	P08729 1xBiotin [K122]	Keratin, type II cytoskeletal 7 OS=Homo sapiens OX=9606 GN=KRT7 PE=1 SV=5	1	1856	6.37	4.664	2.647	2.67	2.22	1.4	0.879868	0.595941	0.995273	1	1	1	19.3	50.3	47.5	122.6	234.7	125.6	122.9	11.8	11.9	55.6	31.1	23.8	237.6	29.3	27.2	240.5	75.8	16.8	244.9	89.4	145	331	27.9	77.6	16419	1574.32	1589.4	7431.31
[R].IGDLQAFQGHGAGNLAGLKGR.[L]	1xBiotin [K19]	4	8	P08195	P08195 [227-247]	P08195 1xBiotin [K245]	4F2 cell-surface antigen heavy chain OS=Homo sapiens OX=9606 GN=SLC3A2 PE=1 SV=3	1	2306.18	1.824	4.551	1.415	0.87	2.19	0.5	0.99231	0.982123	0.999883	1	1	1	49.7	55.4	62.9	90.6	252.3	89.1	131.8	22.9	12.7	95.4	19.9	25.5	245.7	19.8	29	224.6	41.7	24.8	259.4	14.3	116.2	459.4	15.9	41	19000.7	3296.17	1826.63	13756
[R].SNDPKSQNHPGWLMR.[G]	1xBiotin [K5]; 1xOxidation [M14]	2	3	P06213	P06213 [567-581]	P06213 1xBiotin [K571]	Insulin receptor OS=Homo sapiens OX=9606 GN=INSR PE=1 SV=4	1	2008.91	8.764	4.532	4.492	3.13	2.18	2.17	0.000610843	0.00201231	0.00958862	0.00574278	0.017111	0.0677292	27.7	30.3	29.4	243	137.3	132.3	17.2	28.9	44.9	31.6	34.7	19.3	46.2	17.4	30.7	133.3	253.2	265.3	109.4	143.1	251.4	88.3	137.9	147	1551.95	2602.34	4046.66	2843.22
[K].GTKVVGAQSLK.[E]	1xBiotin [K3]	2	6	P52209	P52209 [49-59]	P52209 1xBiotin [K51]	6-phosphogluconate dehydrogenase, decarboxylating OS=Homo sapiens OX=9606 GN=PGD PE=1 SV=3	1	1313.72	5.7	4.352	2.859	2.51	2.12	1.52	0.00300695	0.00554227	0.0345654	0.0233389	0.0408781	0.194704	29.2	35.7	55.2	166.6	155.5	157.8	32.1	30	25.8	13.5	68.5	36.7	28	69.5	56.6	171	129.7	181.5	130.5	181	159.5	127.2	197	161.9	3389.36	3171.54	2731.81	1430.8
[R].HLYKELMGPWNK.[D]	1xBiotin [K4]	2	35	P05121	P05121 [100-111]	P05121 1xBiotin [K103]	Plasminogen activator inhibitor 1 OS=Homo sapiens OX=9606 GN=SERPINE1 PE=1 SV=1	1	1741.86	1.717	4.347	1.578	0.78	2.12	0.66	0.9799	0.380013	0.999829	1	1	1	68.1	34	90.4	116.9	147.9	142.6	90.9	28.6	50.1	169.7	7.3	25	167.3	54.1	66.4	190.8	85.9	35.6	298.4	80.1	108.7	181.7	54.4	104.8	26814.9	8433.75	14764.5	50045.3
[K].AKFVGDPALVLNDIHK.[K]	1xBiotin [K2]	1	9	Q14118	Q14118 [610-625]	Q14118 1xBiotin [K611]	Dystroglycan 1 OS=Homo sapiens OX=9606 GN=DAG1 PE=1 SV=2	1	1963.05	1.741	4.335	2.131	0.8	2.12	1.09	0.963895	0.594898	0.995235	1	1	1	59.9	54.3	46.7	104.3	235.3	99.6	152.4	33.7	17.4	30.6	24.8	38.4	220.8	26.3	23.7	271.6	58.8	40.7	278.3	47.5	132.6	319.4	26.9	56.1	15320.8	3392.08	1747.08	3073.69
[K].YKMNLYGFHGGQR.[MV]	1xBiotin [K2]	3	14	P22105-1	P22105-1 [2051-2063]; [2258-2270]; [2367-2379]; [2692-2704]; [2906-2918]; [3122-3134]	P22105-1 1xBiotin [K2052]; 1xBiotin [K2259]; 1xBiotin [K2368]; 1xBiotin [K2693]; 1xBiotin [K2907]; 1xBiotin [K3123]	Isoform 3 of Tenascin-X OS=Homo sapiens OX=9606 GN=TNXB	1	1796.84	4.657	4.303	0.774	2.22	2.11	-0.37	0.720631	0.384898	0.988865	1	1	1	23.8	38.7	146.6	110.8	166.6	113.5	15.9	21.5	149.2	34.9	12.9	109.4	49.2	232.4	132.2	56	165.8	99.9	150.3	116	181.3	30.5	102.4	140.2	2602.89	3514.82	24439.8	5719.26
[R].LNGDFAQLNLKIK.[F]	1xBiotin [K11]	2	7	P19022	P19022 [657-669]	P19022 1xBiotin [K667]	Cadherin-2 OS=Homo sapiens OX=9606 GN=CDH2 PE=1 SV=4	1	1699.92	2.074	4.258	2.904	1.05	2.09	1.54	0.306422	0.0949754	0.397499	1	0.415712	1	42.3	44.6	60.3	87.7	190.1	175	31.5	65.5	43.6	46	36.9	55.1	52.3	62.1	63.1	173.6	90.4	83.2	195.9	79.2	224.1	180.4	48	269.1	1996.13	4150.01	2760.19	2912.8
[R].NFLKEDAMKTK.[T]	1xBiotin [K9]; 1xOxidation [M8]	1	1	Q29983	Q29983 [167-177]	Q29983 1xBiotin [K175]	MHC class I polypeptide-related sequence A OS=Homo sapiens OX=9606 GN=MICA PE=1 SV=1	2	1566.77	7.234	4.169	4.871	2.85	2.06	2.28	0.0035099	0.078919	0.0448095	0.0269294	0.3633	0.244785	28.3	40.8	26.6	204.5	170.2	129.6	30	24.7	39.5	42	43.3	50.6	28.2	22.8	49.8	129.7	216.9	252.2	58.6	265.6	180.5	62.8	165.5	137.4	2278.06	1878.77	2998.12	3187.61
[R].ILDPTKLGPR.[M]	1xBiotin [K6]	5	9	Q13308	Q13308 [631-640]	Q13308 1xBiotin [K636]	Inactive tyrosine-protein kinase 7 OS=Homo sapiens OX=9606 GN=PTK7 PE=1 SV=2	1	1335.75	5.153	4.142	2.937	2.37	2.05	1.55	0.0130839	0.0218602	0.113235	0.0856228	0.132652	0.510326	32.1	34.6	57	165.4	143.4	167.4	14.5	31	66.8	36.2	33.4	17	111.8	21.8	55	159.6	144.8	211.4	143.2	138.4	116.2	141.4	195.9	161.6	1678.29	3576.82	7709.61	4181.51
[R].KLNFQVELLLDK.[L]	1xBiotin [K1]	3	5	P06756	P06756 [520-531]	P06756 1xBiotin [K520]	Integrin alpha-V OS=Homo sapiens OX=9606 GN=ITGAV PE=1 SV=2	1	1685.93	1.542	4.106	0.907	0.62	2.04	-0.14	0.81337	0.653225	0.995617	1	1	1	57.1	59	80.3	88.1	242.5	72.9	45.2	29.9	34.9	29.6	55.8	36.1	168.8	25.3	49.1	260.4	50.1	53.8	274.9	41.8	148.2	418.5	32.9	44.5	3295.85	2178.08	2543.69	2153.47
[R].NGNPAPKITWYR.[N]	1xBiotin [K7]	1	7	P50895	P50895 [176-187]	P50895 1xBiotin [K182]	Basal cell adhesion molecule OS=Homo sapiens OX=9606 GN=BCAM PE=1 SV=2	1	1642.82	1.274	4.052	1.726	0.35	2.02	0.79	0.700492	0.0217883	0.791716	1	0.132652	1	82.9	41.9	73.2	105.7	169.9	126.4	102.8	79.3	63.5	92.9	40.1	31	66.4	70	88.3	100.2	101	176.5	162.4	207.4	92.5	83.6	121.1	120.8	10666.3	8225.11	6586.59	9631.22
[K].YMGKGSMTGLALK.[H]	1xBiotin [K4]	4	9	O00339	O00339 [727-739]	O00339 1xBiotin [K730]	Matrilin-2 OS=Homo sapiens OX=9606 GN=MATN2 PE=1 SV=4	1	1582.78	0.945	4.041	1.423	-0.08	2.01	0.51	0.87979	0.201999	0.986558	1	0.686179	1	97.8	36.6	92.9	92.5	148.1	132.2	16.2	104	142.8	20.2	72.4	39	98.7	54.7	112.9	172.1	74.8	98.3	177.8	93.6	157.4	77.4	147.2	140.5	1591.14	10242.2	14066.9	1991.15
[R].KPLENLGMTDMFR.[Q]	1xBiotin [K1]; 1xOxidation [M]	2	7	P05121	P05121 [311-323]	P05121 1xBiotin [K311]	Plasminogen activator inhibitor 1 OS=Homo sapiens OX=9606 GN=SERPINE1 PE=1 SV=1	0	1793.84	1.105	4.035	1.476	0.14	2.01	0.56	0.999985	0.0707202	0.988051	1	0.333134	1	67.5	58.3	66.4	74.6	235.2	98	90.3	58.7	64.8	64.6	33.1	55.9	98.6	63.7	55.9	118.7	48.8	71.5	385.4	67.5	225.5	94	53.1	149.6	4852.68	3157.73	3480.4	3474.78
[K].TFGKAAGPSLSHTSGGTQSK.[V]	1xBiotin [K4]	1	6	P27694	P27694 [164-183]	P27694 1xBiotin [K167]	Replication protein A 70 kDa DNA-binding subunit OS=Homo sapiens OX=9606 GN=RPA1 PE=1 SV=2	1	2145.04	2.51	4.028	1.697	1.33	2.01	0.76	0.818838	0.708816	1	1	1	1	47.5	35.5	94.6	119.1	142.9	160.5	57	34	46.8	35	160	26.8	203	32.6	93.3	40.9	117.5	199.2	106.3	140.9	158.6	24.5	165.3	158.3	4000.62	2387.22	3285.59	2454.52
[K].YEKPDGSPVFIAFR.[S]	1xBiotin [K3]	3	4	Q13740	Q13740 [58-71]	Q13740 1xBiotin [K60]	CD166 antigen OS=Homo sapiens OX=9606 GN=ALCAM PE=1 SV=2	0	1851.91	1.244	3.999	1.594	0.31	2	0.67	0.923507	0.715383	0.994311	1	1	1	64	49	81.6	79.6	195.8	130	37.1	42.7	52.9	106	32.7	20.4	152.1	28.7	54.4	385.9	33.2	53.1	277.6	43.8	130.7	223.7	38.2	86.8	2730.18	3140.45	3889.95	7796.79
[R].VKYETELAMR.[Q]	1xBiotin [K2]	1	8	P05783	P05783 [166-175]	P05783 1xBiotin [K167]	Keratin, type I cytoskeletal 18 OS=Homo sapiens OX=9606 GN=KRT18 PE=1 SV=2	1	1465.72	2.473	3.998	1.547	1.31	2	0.63	0.0778663	0.12453	0.89517	0.389331	0.48901	1	68.6	42.6	58.4	169.6	170.5	90.3	15.2	69.3	71	40.8	85.7	43.1	108.5	56.6	58.9	173.4	171.4	92.5	117.8	172.2	194.7	90.9	91.2	146.8	2769.19	12644.2	12951.2	7443.6
[K].YKMHLYGLHEGR.[R]	1xBiotin [K2]	3	1	P22105-1	P22105-1 [2159-2170]; [2475-2486]; [2586-2597]; [2800-2811]	P22105-1 1xBiotin [K2160]; 1xBiotin [K2476]; 1xBiotin [K2587]; 1xBiotin [K2801]	Isoform 3 of Tenascin-X OS=Homo sapiens OX=9606 GN=TNXB	1	1729.83	1.296	3.941	0.322	0.37	1.98	-1.63	0.833431	0.249283	0.708538	1	0.786743	1	101.5	42.5	118.9	131.5	167.4	38.3	32.8	96.6	147.4	28.3	40.4	122.1	40.7	113.2	154.9	115.2	125.2	169	120.7	159.4	187.6	73.5	36.5	36.4	3330.99	9798.85	14946.9	2868.72
[K].TKTHYHAMHADCLQELR.[R]	1xBiotin [K2]; 1xCarbamidomethyl [C12]	1	2	Q29983	Q29983 [176-192]	Q29983 1xBiotin [K177]	MHC class I polypeptide-related sequence A OS=Homo sapiens OX=9606 GN=MICA PE=1 SV=1	1	2337.07	2.036	3.902	2.329	1.03	1.96	1.22	0.487771	0.320846	0.834201	1	0.947633	1	44.1	59.3	52.7	89.8	231.3	122.8	62.2	41.7	37.7	64.6	33.5	56.1	49.9	45.3	82.6	77.4	228.4	85	271.4	52.2	218.9	116.3	40.4	236.3	2920.62	1959.05	1769.55	3031.42
[R].AKQEELEAALQR.[G]	1xBiotin [K2]	1	5	P08729	P08729 [352-363]	P08729 1xBiotin [K353]	Keratin, type II cytoskeletal 7 OS=Homo sapiens OX=9606 GN=KRT7 PE=1 SV=5	1	1611.82	2.752	3.876	1.629	1.46	1.95	0.7	0.0333899	0.00128518	0.136681	0.194653	0.0112139	0.59243	63.5	40.4	62.6	174.8	156.6	102	69.7	63.9	60.3	37.8	40.7	49.7	63.1	36.2	67.1	205.3	98.9	176	104.9	255.7	157.7	87.3	122.8	102.7	4032.62	3698.08	3489.12	2188.82
[K].HVLTAAHCIHDGKTYVK.[G]	1xBiotin [K]; 1xCarbamidomethyl [C8]	2	19	O95084	O95084 [169-185]	O95084 1xBiotin [K]	Serine protease 23 OS=Homo sapiens OX=9606 GN=PRSS23 PE=1 SV=1	1	2176.08	1.69	3.833	1.261	0.76	1.94	0.34	0.998617	0.150882	1	1	0.556001	1	58	43	104.4	98	164.8	131.7	131.8	44.1	61	45.2	14	99.4	96	117.3	109.8	46.6	103.1	127.9	95	179.1	173.4	54.4	163.4	138.6	35479.9	11858.2	16412.8	12169.4
[K].VPPTVTSTVLKR.[L]	1xBiotin [K11]	2	3	Q99715	Q99715 [1043-1054]	Q99715 1xBiotin [K1053]	Collagen alpha-1(XII) chain OS=Homo sapiens OX=9606 GN=COL12A1 PE=1 SV=2	1	1523.86	1.909	3.824	1.086	0.93	1.94	0.12	0.866508	0.952605	0.938328	1	1	1	64.2	39.2	107.5	122.6	149.8	116.7	26.8	64.8	102	39.5	147.9	26.2	35.4	108.4	117.5	123.7	79.9	136	23.4	151.2	201.2	117.8	198.5	99.7	2174.89	5255.31	8267.94	3204.1
[K].IGPLVDKQIYR.[F]	1xBiotin [K7]	2	13	Q9NT68	Q9NT68 [2068-2078]	Q9NT68 1xBiotin [K2074]	Teneurin-2 OS=Homo sapiens OX=9606 GN=TENM2 PE=1 SV=3	1	1527.84	1.258	3.726	2.06	0.33	1.9	1.04	0.512104	7.99409e-05	0.0262889	1	0.00103613	0.15738	93.2	32.1	77.7	117.3	119.7	160	94.8	63.5	99.2	42.9	32.7	19.6	98.4	79	75.9	122.5	119.2	106.4	92.1	140.3	121.7	162.7	162.2	166.9	8576.16	5747.78	8981.71	3884.65
[K].KTLQVEER.[Y]	1xBiotin [K1]	2	4	Q76M96	Q76M96 [240-247]	Q76M96 1xBiotin [K240]	Coiled-coil domain-containing protein 80 OS=Homo sapiens OX=9606 GN=CCDC80 PE=1 SV=1	1	1228.64	2.579	3.694	3.332	1.37	1.89	1.74	0.527483	0.104875	0.341569	1	0.447312	1	45.3	45.4	51.8	117	167.7	172.8	52.1	27.5	43.6	43.7	105.8	20.9	44.9	115.9	49.9	38.2	112.5	143.7	147.6	183.4	161.3	104.6	166.2	238.2	3775	1993.67	3161.96	3166.13
[R].LQEETGAKISVLGK.[G]	1xBiotin [K8]	2	4	Q07666	Q07666 [187-200]	Q07666 1xBiotin [K194]	KH domain-containing, RNA-binding, signal transduction-associated protein 1 OS=Homo sapiens OX=9606 GN=KHDRBS1 PE=1 SV=1	1	1698.91	3.201	3.687	2.127	1.68	1.88	1.09	0.0457239	0.00592307	0.223509	0.251199	0.0429744	0.869924	40.6	53.5	57.2	130	197.1	121.6	38.4	68.2	41.9	55.2	36.9	64.2	57.7	94.7	59.1	85.4	134.4	134.3	203.7	237.2	97.7	125.7	103.5	161.8	1475.78	2625.72	1614	2125.34
[K].HAVSEGTKAVTK.[Y]	1xBiotin [K8]	17	13	Q16778; P58876	Q16778 [110-121]; P58876 [110-121]	Q16778 1xBiotin [K117]; P58876 1xBiotin [K117]	Histone H2B type 2-E OS=Homo sapiens OX=9606 GN=H2BC21 PE=1 SV=3 Histone H2B type 1-D OS=Homo sapiens OX=9606 GN=H2BC5 PE=1 SV=2	1	1453.75	2.774	3.669	0.911	1.47	1.88	-0.13	0.150277	0.124608	0.949433	0.634871	0.48901	1	41.8	36.1	143.2	116.1	132.3	130.4	43	45	11.9	17.5	53.9	37.1	29.8	147.2	156.7	78.8	119.3	157	136	133.8	148.2	68.9	134.1	281.8	8345.9	8739.7	2307.47	3399
[R].AVPVGEKTTYR.[G]	1xBiotin [K7]	1	3	P08582	P08582 [680-690]	P08582 1xBiotin [K686]	Melanotransferrin OS=Homo sapiens OX=9606 GN=MELTF PE=1 SV=2	1	1446.74	2.785	3.664	1.876	1.48	1.87	0.91	0.00829936	0.000838023	0.49661	0.0574075	0.00755919	1	53.7	44.3	66	149.7	162.5	123.8	33.5	58.5	57.4	47.4	29.7	51.4	62.3	70.5	101.2	85	188.2	159.9	145.3	173.5	179.8	88.7	135.7	132.2	1838.73	3214.92	3154.25	2601.74
[R].LRENELTYYCCKK.[D]	1xBiotin [K13]; 2xCarbamidomethyl [C10; C11]	2	5	P13987	P13987 [79-91]	P13987 1xBiotin [K91]	CD59 glycoprotein OS=Homo sapiens OX=9606 GN=CD59 PE=1 SV=1	2	2002.92	0.814	3.658	0.968	-0.3	1.87	-0.05	1	0.137132	1	1	0.514246	1	122.7	32.3	115.2	99.9	118.3	111.6	127.8	61.4	119.5	31.5	27.6	116.5	112.2	135.4	97.3	90.2	97.3	102.1	97.4	122.7	115.2	89.8	108.6	147.7	12542	6020.5	11721.8	3088.7
[K].WSDPITLHQGKTPGSIDTWPGR.[R]	1xBiotin [K11]	1	8	Q9BT76-3	Q9BT76-3 [172-193]	Q9BT76-3 1xBiotin [K182]	Isoform 3 of Uroplakin-3b OS=Homo sapiens OX=9606 GN=UPK3B	1	2675.3	2.026	3.648	0.923	1.02	1.87	-0.12	0.882211	0.705892	1	1	1	1	49.5	55.6	99.7	100.2	202.9	92	54.8	21.2	24.2	20.7	30.7	27.3	263.9	32.4	48.9	372.9	24.9	49.1	284.1	25.4	99.4	345.1	45.1	29.9	3841.2	1483.84	1698.36	1447.97
[R].VGLVAKGLLLK.[G]	1xBiotin [K6]	7	1	Q12906	Q12906 [95-105]	Q12906 1xBiotin [K100]	Interleukin enhancer-binding factor 3 OS=Homo sapiens OX=9606 GN=ILF3 PE=1 SV=3	1	1336.84	1.581	3.632	1.201	0.66	1.86	0.26	0.674228	0.00453915	0.998602	1	0.0336653	1	86	39.8	87.9	135.9	144.7	105.6	83.8	64.4	110.5	80.2	22.2	38.8	85.7	85.2	111	132.5	143.3	100.3	159.5	141	127.5	103	82.9	128.1	6531.75	5016.64	8615.28	6247.3
[R].AWTSKGSGPLSPSIQSR.[T]	1xBiotin [K5]	2	3	P10586	P10586 [990-1006]	P10586 1xBiotin [K994]	Receptor-type tyrosine-protein phosphatase F OS=Homo sapiens OX=9606 GN=PTPRF PE=1 SV=2	1	1984.99	4.478	3.593	0.611	2.16	1.85	-0.71	0.179562	0.12142	0.99999	0.735323	0.482429	1	38.5	65.7	54	172.6	236.1	33	39	53.5	30	69	66.5	47.3	63.9	36.1	54.7	174.7	53.2	223.2	254	238.9	166.7	169	33.4	27	2219.69	3042.56	1709.51	3925.84
[R].LQAEIDNIKNQR.[A]	1xBiotin [K9]	1	6	P08729	P08729 [318-329]	P08729 1xBiotin [K326]	Keratin, type II cytoskeletal 7 OS=Homo sapiens OX=9606 GN=KRT7 PE=1 SV=5	1	1667.85	3.538	3.581	2.606	1.82	1.84	1.38	0.00392141	0.00370585	0.093295	0.0299148	0.0289316	0.433968	37.8	40	68	133.8	143.2	177.2	37.9	60	28.9	26.3	51.4	40	59.9	68.1	122.8	134	100.7	181.3	100.1	144	143.4	177.5	140.2	183.4	2593.79	4107.54	1981.32	1800.09
[K].WIEAGPVVLKHPASEAEIQPQTQVTLR.[C]	1xBiotin [K10]	6	3	Q13308	Q13308 [123-149]	Q13308 1xBiotin [K132]	Inactive tyrosine-protein kinase 7 OS=Homo sapiens OX=9606 GN=PTK7 PE=1 SV=2	1	3223.69	1.233	3.556	1.059	0.3	1.83	0.08	0.954236	0.730602	0.999748	1	1	1	75	54.2	90.1	92.5	192.7	95.5	54	57	44.5	39	71.6	32.5	188.3	34.1	64.9	335.3	32.5	66.6	225.8	46.2	138.7	260.4	68.7	39.9	3006.19	3172.12	2478.39	2171.22
[R].NYGFQGGQNKYVGTGGIDQKPR.[T]	1xBiotin [K10]	2	10	Q9UHN6	Q9UHN6 [837-858]	Q9UHN6 1xBiotin [K846]	Cell surface hyaluronidase OS=Homo sapiens OX=9606 GN=CEMIP2 PE=1 SV=1	1	2610.25	5.303	3.542	2.196	2.41	1.82	1.13	0.100572	0.495755	0.992536	0.481233	1	1	30.6	44.7	63.9	162.1	158.5	140.2	31.4	36.2	20.2	137.4	30.1	46	128.3	65.6	28.9	204.1	166.7	83.8	162.9	99.6	228.4	160.3	26	144.1	2214.89	2549.3	1422.71	9679.55
[R].LGDKILQVSFK.[T]	1xBiotin [K4]	2	9	Q15717	Q15717 [310-320]	Q15717 1xBiotin [K313]	ELAV-like protein 1 OS=Homo sapiens OX=9606 GN=ELAVL1 PE=1 SV=2	1	1473.81	1.491	3.46	2.303	0.58	1.79	1.2	0.35433	0.0033138	0.00461577	1	0.0263329	0.0362474	76.5	50.3	56	114.1	174.1	129	57.2	68	70.6	44.7	58.3	39.8	55.9	49.8	29.9	79.1	101.4	166.2	208.1	141	154.8	114.7	107.3	253.2	2875.07	3417.8	3549.23	2248.86
[R].DKILGATIENSR.[I]	1xBiotin [K2]	1	6	P08727	P08727 [139-150]	P08727 1xBiotin [K140]	Keratin, type I cytoskeletal 19 OS=Homo sapiens OX=9606 GN=KRT19 PE=1 SV=4	1	1542.79	1.547	3.407	3.007	0.63	1.77	1.59	0.285362	0.0856758	0.0577897	1	0.383816	0.303637	72.8	48.4	50.2	112.7	165	150.9	21.5	91.3	75	49.9	83.6	46.2	50.1	51.7	68.8	120.6	87.7	116	109.9	180.3	169.9	130.9	191.2	155.4	1695.3	7192.07	5903.38	3926.49
[K].VTQQGLKMVVPGLDGAQIPR.[D]	1xBiotin [K7]; 1xOxidation [M8]	1	2	P49327	P49327 [1152-1171]	P49327 1xBiotin [K1158]	Fatty acid synthase OS=Homo sapiens OX=9606 GN=FASN PE=1 SV=3	1	2349.24	1.696	3.39	0.609	0.76	1.76	-0.72	0.549194	0.216877	0.99956	1	0.718439	1	49.8	69.7	99.3	84.5	236.2	60.5	44	44.7	48.7	82.6	58	62.5	67.6	89.1	105	200.3	50	75.8	212	91.2	296	170.9	54.2	47.3	1680.57	1706.13	1857.71	3153.13
[K].SFQKIQVR.[L]	1xBiotin [K4]	1	3	P62081	P62081 [71-78]	P62081 1xBiotin [K74]	40S ribosomal protein S7 OS=Homo sapiens OX=9606 GN=RPS7 PE=1 SV=1	1	1231.66	3.805	3.389	1.186	1.93	1.76	0.25	0.00515359	0.00617828	0.925624	0.0378025	0.0443441	1	37.2	43.7	104.8	141.7	148.3	124.3	34.6	34.6	34.9	26	89.8	40.7	110.6	90.5	97.4	131.7	84.6	159.3	123.1	218	137.8	114.6	156.5	115.5	2655.04	2653.42	2674.65	1995.02
[R].LLELKLQDNELR.[A]	1xBiotin [K5]	1	7	Q6EMK4	Q6EMK4 [150-161]	Q6EMK4 1xBiotin [K154]	Vasorin OS=Homo sapiens OX=9606 GN=VASN PE=1 SV=1	1	1709.93	2.663	3.349	1.642	1.41	1.74	0.72	0.0888878	0.0134905	0.836897	0.436269	0.0861716	1	44	53.4	78.3	117.1	178.8	128.5	41.1	41.3	78.7	42.6	50.2	85.3	151.9	55.1	73.6	132.9	93.9	110.1	170.6	168	156	130.2	97.7	120.8	1765.71	1776.19	3382.94	1829.99
[K].YKPTPIPIKVK.[V]	1xBiotin [K9]	1	2	Q14126	Q14126 [368-378]	Q14126 1xBiotin [K376]	Desmoglein-2 OS=Homo sapiens OX=9606 GN=DSG2 PE=1 SV=2	1	1509.89	4.59	3.331	1.505	2.2	1.74	0.59	0.0205415	0.0960927	0.572845	0.124326	0.419228	1	36.9	52.7	66	169.6	175.6	99.3	27.2	36	70.3	113.8	51.4	41.8	72.9	28.8	64.3	110.6	207.4	165.3	171.1	162.4	186.9	135.4	96.8	57.7	1547.27	2051.05	4005.26	6483.27
[K].KNHEEEISTLR.[G]	1xBiotin [K1]	1	21	P08727	P08727 [216-226]	P08727 1xBiotin [K216]	Keratin, type I cytoskeletal 19 OS=Homo sapiens OX=9606 GN=KRT19 PE=1 SV=4	1	1581.77	1.38	3.33	3.077	0.47	1.74	1.62	0.325783	0.0127536	0.0128379	1	0.0830541	0.0878901	79.5	46.6	51.3	109.8	155.1	157.8	97.7	83	53.7	48.6	62.7	47.4	53.5	41.4	59.6	100.3	114.6	173.6	92.2	161.8	185.2	90.2	169.8	164.7	26432.2	22459.4	14519.2	13145.5
[R].GQSKLIFKPDLTLEEVQAENPK.[V]	1xBiotin [K4]	1	4	O60513	O60513 [86-107]	O60513 1xBiotin [K89]	Beta-1,4-galactosyltransferase 4 OS=Homo sapiens OX=9606 GN=B4GALT4 PE=1 SV=1	1	2710.41	2.181	3.32	1.015	1.13	1.73	0.02	0.671159	0.868727	0.99516	1	1	1	41.3	67.5	87.9	90.1	224	89.2	30.6	31.1	59.5	73.4	50.8	31.4	73	57.7	66.2	317.2	67.9	54.3	222.7	29.2	168.6	368.2	31	67.2	1622.37	1649.84	3157.26	3891.34
[K].VIPELNGKLTGMAFR.[V]	1xBiotin [K8]	2	13	P04406	P04406 [220-234]	P04406 1xBiotin [K227]	Glyceraldehyde-3-phosphate dehydrogenase OS=Homo sapiens OX=9606 GN=GAPDH PE=1 SV=3	1	1871.99	3.904	3.3	2.154	1.96	1.72	1.11	0.930022	0.942069	0.995559	1	1	1	35.1	69.5	40.9	137.1	229.4	88	114.7	10.8	13.1	66.7	26	16.6	286.6	15.3	12.1	407.5	51.2	17.9	286.3	23.1	85.7	306	27.5	32.9	15939.4	1505.04	1823.78	9271.17
[R].VDVAVNCAGIAVASKTYNLK.[K]	1xBiotin [K15]; 1xCarbamidomethyl [C7]	2	7	Q99714	Q99714 [85-104]	Q99714 1xBiotin [K99]	3-hydroxyacyl-CoA dehydrogenase type-2 OS=Homo sapiens OX=9606 GN=HSD17B10 PE=1 SV=3	1	2319.18	1.356	3.277	0.942	0.44	1.71	-0.09	0.939331	0.531271	0.981016	1	1	1	56.7	71.7	82.2	76.9	235	77.5	58.4	42.5	44.4	66.1	56.1	33.2	117.9	64.3	40.2	153.9	60.1	55.8	190.1	70.7	183.8	467.4	60.6	34.6	3390.56	2466.27	2576.33	3839.63
[-].MAPIGLKAVVGEK.[I]	1xBiotin [K7]; 1xMet-loss [N-Term]	2	1	P61764	P61764 [1-13]	P61764 1xBiotin [K7]; 1xMet-loss [N-Term]	Syntaxin-binding protein 1 OS=Homo sapiens OX=9606 GN=STXBP1 PE=1 SV=1	1	1407.8	1.826	3.259	2.158	0.87	1.7	1.11	0.0281959	0.0012456	0.011322	0.165095	0.01094	0.0791352	66.7	45.5	68.9	121.8	148.3	148.8	52	65.2	74.4	44.5	36.9	67.1	67.4	84.6	62.8	94.5	119	167.3	144.9	155.6	102.7	174.1	141.6	145.4	2191.8	2749.98	3139.57	1875.04
[R].EETGAALKPR.[L]	1xBiotin [K8]	3	6	P39060	P39060 [679-688]	P39060 1xBiotin [K686]	Collagen alpha-1(XVIII) chain OS=Homo sapiens OX=9606 GN=COL18A1 PE=1 SV=5	0	1297.66	4.444	3.24	1.761	2.15	1.7	0.82	0.101059	0.272244	1	0.481835	0.835507	1	21.2	64.3	76.7	94.4	208.2	135.2	73.5	10.4	18.3	55.3	79.1	25.3	54.1	204.9	66.1	81.3	74.2	267.3	136.3	179.2	183.1	53.3	116.3	122	11382	1603.28	2830.06	8558.5
[K].SKFADLSEAANR.[N]	1xBiotin [K2]	1	4	P08670	P08670 [293-304]	P08670 1xBiotin [K294]	Vimentin OS=Homo sapiens OX=9606 GN=VIM PE=1 SV=4	1	1534.73	2.607	3.206	0.77	1.38	1.68	-0.38	0.496354	0.183908	0.999926	1	0.637709	1	51.3	51.6	111.7	133.8	165.5	86	52.4	21.1	142	103.4	31.7	52.8	119.2	57.4	114.2	145.7	77.2	136.8	173.9	169.2	147.3	87.9	99	68.8	3545.92	1425.64	9601.81	6989.56
[K].YSFGATCVKK.[C]	1xBiotin [K]; 1xCarbamidomethyl [C7]	4	11	P00533	P00533 [285-294]	P00533 1xBiotin [K]	Epidermal growth factor receptor OS=Homo sapiens OX=9606 GN=EGFR PE=1 SV=2	1	1386.65	1.194	3.201	1.278	0.26	1.68	0.35	0.737752	0.0472177	0.974005	1	0.242445	1	103.8	21.2	124.3	123.9	67.9	158.9	27.7	113.2	133.6	23.2	16.2	27.1	69.4	135.6	146.8	135.2	99.4	154.2	56.7	123.4	74.1	95	195.9	173.3	3549.8	14514.5	17129	2969.18
[R].HQGVMVGMGQKDSYVGDEAQSK.[R]	1xBiotin [K11]	6	5	P60709	P60709 [40-61]	P60709 1xBiotin [K50]	Actin, cytoplasmic 1 OS=Homo sapiens OX=9606 GN=ACTB PE=1 SV=1	1	2577.15	1.846	3.196	2.488	0.88	1.68	1.31	0.977228	0.441435	0.976405	1	1	1	71.2	46.3	58.2	131.5	148	144.8	53.9	54.2	108.8	35.2	45.1	29.3	252.9	44.3	25.5	214	100.1	53.5	310.2	42.1	112.6	110.2	66.7	141.5	2979.18	2993.73	6005.48	1945.57
[K].CWKFEHCNFNDVTTR.[L]	1xBiotin [K3]; 2xCarbamidomethyl [C1; C7]	2	5	P13987	P13987 [64-78]	P13987 1xBiotin [K66]	CD59 glycoprotein OS=Homo sapiens OX=9606 GN=CD59 PE=1 SV=1	1	2239.95	0.747	3.165	0.898	-0.42	1.66	-0.15	0.998262	0.46862	0.999971	1	1	1	99.4	52.9	108.5	74.3	167.5	97.4	166.6	67.6	48.8	36	70.8	27.4	199.8	73.7	55.9	144.3	50.5	38.2	240	58.6	113.9	282.5	66.2	59	8657.84	3510.63	2533.01	1869.32
[R].HQGVMVGMGQKDSYVGDEAQSK.[R]	1xBiotin [K11]; 2xOxidation [M5; M8]	6	2	P60709	P60709 [40-61]	P60709 1xBiotin [K50]	Actin, cytoplasmic 1 OS=Homo sapiens OX=9606 GN=ACTB PE=1 SV=1	1	2609.14	0.541	3.161	1.822	-0.89	1.66	0.87	0.949615	0.0527415	0.281855	1	0.266704	1	88.7	50.6	89.6	48	159.9	163.3	57.5	95.3	97.3	57.1	45.3	54.4	46.5	105	96.4	110.9	42.3	51.6	87.6	171.9	200.1	195.2	110	175.6	2165.19	3587.43	3660.37	2146.7
[K].QTSKTGVFVR.[T]	1xBiotin [K4]	1	5	Q8WUJ3	Q8WUJ3 [1103-1112]	Q8WUJ3 1xBiotin [K1106]	Cell migration-inducing and hyaluronan-binding protein OS=Homo sapiens OX=9606 GN=CEMIP PE=1 SV=2	1	1348.7	1.465	3.155	1.437	0.55	1.66	0.52	0.602863	0.0618701	0.463218	1	0.300351	1	68	55.6	82.6	99.7	175.3	118.8	62.1	61.8	38.9	50.5	101.6	31.3	44.8	110.7	75.1	110.9	76.5	90.6	128.3	159.4	206.3	107.9	90.3	253	3210.29	3197.31	2010.87	2611.5
[K].MLETKWSLLQQQK.[T]	1xBiotin [K5]; 1xOxidation [M1]	2	14	P05787	P05787 [118-130]	P05787 1xBiotin [K122]	Keratin, type II cytoskeletal 8 OS=Homo sapiens OX=9606 GN=KRT8 PE=1 SV=7	1	1874.95	3.017	3.152	1.804	1.59	1.66	0.85	0.225031	0.109223	0.740789	0.878412	0.451431	1	49.6	51.8	66.3	149.5	163.3	119.5	111.2	37	47.4	98.2	30.8	49.6	110.9	46.3	63.4	153.7	112.1	142.9	156.2	110.3	180.1	160.4	75.2	114.3	7345.7	2443.12	3128.79	6485.02
[R].LAKYNQLLR.[I]	1xBiotin [K3]	2	5	P06733	P06733 [404-412]	P06733 1xBiotin [K406]	Alpha-enolase OS=Homo sapiens OX=9606 GN=ENO1 PE=1 SV=2	1	1344.75	1.721	3.141	1.185	0.78	1.65	0.24	0.279809	0.0815159	0.996816	1	0.370988	1	78.2	44.7	92.5	134.6	140.4	109.6	22.3	79.9	109	45.7	78.2	17.5	94.6	71.9	97.9	119.2	137.6	184.9	143.5	173.4	104	82.2	126	112	2802.67	10034.7	13687.9	5737.89
[R].HQGVMVGMGQKDSYVGDEAQSK.[R]	1xBiotin [K11]; 1xOxidation [M]	6	4	P60709	P60709 [40-61]	P60709 1xBiotin [K50]	Actin, cytoplasmic 1 OS=Homo sapiens OX=9606 GN=ACTB PE=1 SV=1	1	2593.15	0.811	3.139	2.037	-0.3	1.65	1.03	0.99834	0.21508	0.753794	1	0.714258	1	76.7	45	90.5	62.2	141.4	184.3	79.7	36.2	78.2	80.2	45.9	34	84.7	92.3	113.8	150.7	63.4	37	161.6	84.5	144.1	92.9	233.1	187.9	3446.31	1563.05	3379.56	3466.57
[R].LLKASIPFSVVGSNQLIEAK.[G]	1xBiotin [K3]	3	2	Q15019	Q15019 [230-249]	Q15019 1xBiotin [K232]	Septin-2 OS=Homo sapiens OX=9606 GN=SEPTIN2 PE=1 SV=1	1	2340.3	1.753	3.13	0.437	0.81	1.65	-1.19	0.952483	0.832006	0.569237	1	1	1	42	52.4	186.4	73.6	164.1	81.5	20.6	23.9	28.7	39.3	29.8	28	917.1	106	32.6	53.7	41.8	35.9	176.7	23.3	93.3	73.8	46.4	29.2	1705.8	1976.65	2375.18	3257.11
[K].YKSEALGVGDVK.[L]	1xBiotin [K2]	2	3	Q9UGI8	Q9UGI8 [182-193]	Q9UGI8 1xBiotin [K183]	Testin OS=Homo sapiens OX=9606 GN=TES PE=1 SV=1	1	1491.75	2.774	3.12	1.207	1.47	1.64	0.27	0.991421	0.538963	0.97947	1	1	1	37.8	51.8	110.6	104.8	161.6	133.5	33.4	135	29	34.9	132.9	45.7	44.5	97.6	125.3	20.9	92.6	173.8	202	142.6	130.2	113.8	127.9	117.8	2745.41	11111.2	2387	2869.13
[R].APKFTQPLQPR.[S]	1xBiotin [K3]	2	4	Q96PD2	Q96PD2 [486-496]	Q96PD2 1xBiotin [K488]	Discoidin, CUB and LCCL domain-containing protein 2 OS=Homo sapiens OX=9606 GN=DCBLD2 PE=1 SV=1	1	1508.8	4.014	3.105	1.996	2	1.63	1	0.015596	0.0243508	0.370944	0.0988134	0.145637	1	31.1	58	68.7	124.9	180.2	137	31.3	28.5	65.1	33.8	58.3	72.8	58	69	79.2	104.3	125.6	165.6	117.1	199.3	181.1	71.2	202.2	137.7	1547.23	1410.37	3220.85	1669.63
[R].DIASPKFSMPSPVR.[T]	1xBiotin [K6]; 1xOxidation [M9]	3	2	Q9NQ79	Q9NQ79 [333-346]	Q9NQ79 1xBiotin [K338]	Cartilage acidic protein 1 OS=Homo sapiens OX=9606 GN=CRTAC1 PE=1 SV=2	1	1773.87	1.541	3.084	2.556	0.62	1.62	1.35	0.253107	0.0817007	0.20083	0.949987	0.370988	0.805128	65.5	45.2	70	101	139.5	178.8	66.1	59.6	49.8	92.3	37.1	41.1	63.6	86.6	37.2	91.8	85.3	245.8	126.9	126.7	175.7	88.9	162.7	162.7	2674.06	2409.19	2013.47	3732.49
[K].FHPLHSKIIIIK.[K]	1xBiotin [K]	2	43	P17936	P17936 [165-176]	P17936 1xBiotin [K]	Insulin-like growth factor-binding protein 3 OS=Homo sapiens OX=9606 GN=IGFBP3 PE=1 SV=2	1	1671.98	2.741	3.069	2.034	1.45	1.62	1.02	0.356636	0.0745635	0.784104	1	0.346056	1	53.7	53	60.5	147.1	162.7	123	112.2	40.2	52.9	71.6	18.8	52.3	84.8	59.6	55.1	145.1	232.1	84.1	188.3	94.7	160.5	159.8	66.7	121.3	122168	43799.1	57652.3	77988.3
[K].QVLKIIASYK.[H]	1xBiotin [K4]	2	5	Q9Y5A9	Q9Y5A9 [539-548]	Q9Y5A9 1xBiotin [K542]	YTH domain-containing family protein 2 OS=Homo sapiens OX=9606 GN=YTHDF2 PE=1 SV=2	1	1388.8	1.713	3.047	1.795	0.78	1.61	0.84	0.733481	0.225855	0.324432	1	0.73901	1	80.8	48.4	66.2	138.3	147.4	118.9	80.1	67.3	57.9	34.3	58.6	40.3	53.1	55.2	75.8	178.4	115.2	76.3	61.2	178.6	122.8	371.9	74.1	99	3889.57	3265.66	2809.21	1663.89
[K].FQDTDGKHLLPK.[I]	1xBiotin [K7]	2	4	P52209	P52209 [242-253]	P52209 1xBiotin [K248]	6-phosphogluconate dehydrogenase, decarboxylating OS=Homo sapiens OX=9606 GN=PGD PE=1 SV=3	1	1624.82	2.773	3.019	2.057	1.47	1.59	1.04	0.513612	0.693212	0.742672	1	1	1	49.3	47.1	73.5	136.6	142.4	151.1	50.2	53	34.9	75.6	45.5	48.1	64.9	74.9	83.7	51.9	139.3	159	33.4	269.9	145.1	76.6	240	154	2292.24	2420.76	1594.06	3450.79
[K].GYLTKEDLR.[V]	1xBiotin [K5]	1	2	P60903	P60903 [24-32]	P60903 1xBiotin [K28]	Protein S100-A10 OS=Homo sapiens OX=9606 GN=S100A10 PE=1 SV=2	1	1320.66	2.461	3.018	2.158	1.3	1.59	1.11	0.119063	0.0591526	0.0910966	0.544347	0.291398	0.425223	59.3	53.6	56.7	146.1	161.9	122.4	86.4	57.4	52.1	66.5	45.3	51.9	26.1	54.9	95.1	135.7	163	141.3	87.7	156.6	200.9	100.7	160	118.4	6806.84	4522.4	4104.9	5239.7
[K].FDLMYAKR.[A]	1xBiotin [K7]; 1xOxidation [M4]	12	3	P68363	P68363 [395-402]	P68363 1xBiotin [K401]	Tubulin alpha-1B chain OS=Homo sapiens OX=9606 GN=TUBA1B PE=1 SV=1	1	1285.61	1.356	3.004	2.267	0.44	1.59	1.18	0.817002	0.0335062	0.115053	1	0.184838	0.513698	74.3	58.1	58.9	100.8	174.4	133.6	79.5	44.2	89.9	36.5	62.1	72	37	106.4	63	75.6	111.8	107.8	99.9	196.9	186.6	129.9	142.9	157.9	3065.3	1703.25	3464.63	1407.6
[K].GKSADFTNFDPR.[G]	1xBiotin [K2]	1	42	P00918	P00918 [170-181]	P00918 1xBiotin [K171]	Carbonic anhydrase 2 OS=Homo sapiens OX=9606 GN=CA2 PE=1 SV=2	1	1580.72	1.72	3.002	2.654	0.78	1.59	1.41	0.161751	0.0272655	0.0797409	0.668536	0.158258	0.388519	68.7	58.7	48.8	118.2	176.2	129.4	74.1	44.8	67.7	40.4	70	57.8	99	37.8	48	116.4	105.2	159.9	104.9	190.6	173.5	93.7	127.4	188.5	62853.1	37992.2	57369.5	34259.9
[R].LQAEIEGLKGQR.[A]	1xBiotin [K9]	2	25	P05787	P05787 [317-328]	P05787 1xBiotin [K325]	Keratin, type II cytoskeletal 8 OS=Homo sapiens OX=9606 GN=KRT8 PE=1 SV=7	1	1567.83	1.663	2.996	1.787	0.73	1.58	0.84	0.112361	0.000209667	0.0238183	0.522653	0.00222838	0.144534	60.8	68.5	58.9	101.2	205.3	105.3	96.2	56.3	58	49.3	65.3	79.1	56.1	45.9	64.1	95.1	141.7	96.4	195.5	172.3	220.4	100.3	109.4	98.6	58172.2	34060.1	35032.7	29831.6
[K].VKEGMNIVEAMER.[F]	1xBiotin [K2]	2	5	P62937	P62937 [132-144]	P62937 1xBiotin [K133]	Peptidyl-prolyl cis-trans isomerase A OS=Homo sapiens OX=9606 GN=PPIA PE=1 SV=2	1	1731.82	0.855	2.991	1.837	-0.23	1.58	0.88	0.999562	0.95531	1	1	1	1	106.3	52.2	68.5	90.9	156.2	125.9	39.1	81.2	119	216.6	30.8	39.9	200.6	42.2	52.4	150.1	69.4	65	271.6	41	119.4	96.2	35.7	129.8	2433.65	5055.08	7406.49	13482.7
[R].LNQLKPGLQYK.[L]	1xBiotin [K5]	7	12	Q12906	Q12906 [409-419]	Q12906 1xBiotin [K413]	Interleukin enhancer-binding factor 3 OS=Homo sapiens OX=9606 GN=ILF3 PE=1 SV=3	0	1527.84	3.094	2.978	4.931	1.63	1.57	2.3	0.00868568	0.0248103	0.00271901	0.05977	0.147208	0.0231203	53.5	49.1	31.3	165.4	146.4	154.3	23.5	55.7	48.8	51.1	38.4	44.8	28.5	62.9	19.3	135.2	190.2	150.9	120	186	133.5	111.7	140.7	258.8	2861.64	6779.23	5931.34	6215.53
[K].KGQDYR.[F]	1xBiotin [K1]	2	4	Q8WUJ3	Q8WUJ3 [379-384]	Q8WUJ3 1xBiotin [K379]	Cell migration-inducing and hyaluronan-binding protein OS=Homo sapiens OX=9606 GN=CEMIP PE=1 SV=2	1	992.462	1.687	2.963	3.046	0.75	1.57	1.61	0.54653	0.0849723	0.00911234	1	0.382959	0.0650618	46.1	69.1	50	77.8	204.7	152.4	44	71.6	30.4	96.7	43.1	65.9	19.3	47.7	56.8	74.2	60.2	121.5	242.4	125.3	195.2	145.4	129.3	231.1	4031.54	6567	2782.86	8861.57
[KR].AKQDMAR.[LQ]	1xBiotin [K2]	4	15	P05787; P13647	P05787 [363-369]; P13647 [442-448]	P05787 1xBiotin [K364]; P13647 1xBiotin [K443]	Keratin, type II cytoskeletal 8 OS=Homo sapiens OX=9606 GN=KRT8 PE=1 SV=7 Keratin, type II cytoskeletal 5 OS=Homo sapiens OX=9606 GN=KRT5 PE=1 SV=3	1	1045.49	1.761	2.956	2.118	0.82	1.56	1.08	0.197397	0.0134647	0.106875	0.791367	0.0861716	0.488623	74.8	52.2	60	131.7	154.4	127	78.4	72.5	61.1	47.7	62.1	50.7	62	54.7	58.2	259.8	66	127.7	149.8	124.5	168.5	106.8	126.5	123.2	36182.9	33464.3	28189.5	21990.5
[R].LWDLVAGKTR.[V]	1xBiotin [K8]	2	23	O43660	O43660 [356-365]	O43660 1xBiotin [K363]	Pleiotropic regulator 1 OS=Homo sapiens OX=9606 GN=PLRG1 PE=1 SV=1	1	1384.74	1.052	2.946	2.228	0.07	1.56	1.16	0.85815	0.000209746	0.00222728	1	0.00222838	0.0198228	97.6	53.5	58.4	102.7	157.5	130.2	112	67	95.1	65.7	39.9	52.1	68.6	56.9	54.1	125.2	97.3	100.1	153.5	121.9	181.4	126.8	157.4	124.8	24830.2	14859.2	21079.6	14561.4
[K].FHGTVKAENGK.[L]	1xBiotin [K6]	2	4	P04406	P04406 [56-66]	P04406 1xBiotin [K61]	Glyceraldehyde-3-phosphate dehydrogenase OS=Homo sapiens OX=9606 GN=GAPDH PE=1 SV=3	1	1413.69	1.418	2.939	4.523	0.5	1.56	2.18	0.575278	0.0277233	0.00911352	1	0.160219	0.0650618	58	51.7	46.4	82.3	152	209.6	67.3	51	58.3	71.2	39	52	46.6	45.9	54.1	82.7	68.9	143.9	94.9	230.4	152.8	93.7	236.6	210.7	13414.1	10157.1	11615.7	14187.9
[K].SLVSKGTLVQTK.[G]	1xBiotin [K5]	5	4	P16401; P10412	P16401 [89-100]; P10412 [86-97]	P16401 1xBiotin [K93]; P10412 1xBiotin [K90]	Histone H1.5 OS=Homo sapiens OX=9606 GN=H1-5 PE=1 SV=3 Histone H1.4 OS=Homo sapiens OX=9606 GN=H1-4 PE=1 SV=2	1	1486.83	4.746	2.902	3.127	2.25	1.54	1.64	0.000510275	0.00293291	0.00651395	0.00486584	0.0240211	0.0485817	37.1	45.1	51	176.2	131	159.6	54.1	36.6	23.2	55.3	25.1	44.5	29.7	50.4	52.3	173.8	200.1	167.1	213.9	116.5	129.2	108.8	162	157.5	3761.77	2547.63	1616.2	3849.02
[K].ENLAVGSKINGYK.[A]	1xBiotin [K8]	2	7	Q14574	Q14574 [482-494]	Q14574 1xBiotin [K489]	Desmocollin-3 OS=Homo sapiens OX=9606 GN=DSC3 PE=1 SV=3	1	1618.83	3.017	2.862	3.063	1.59	1.52	1.61	0.0745931	0.140221	0.0665432	0.374367	0.524006	0.336497	43.5	53.2	54.1	131.3	152.3	165.7	38.8	33.6	91.6	35.8	47.5	95.4	45.6	78	48.3	189.6	105.4	117.1	186.3	135.8	86.6	131.9	184.8	147.8	1628.34	1407.67	3841.39	1502.64
[R].KLMVALAK.[G]	1xBiotin [K1]	3	2	P07355	P07355 [169-176]	P07355 1xBiotin [K169]	Annexin A2 OS=Homo sapiens OX=9606 GN=ANXA2 PE=1 SV=2	1	1099.64	1.279	2.848	1.529	0.35	1.51	0.61	0.709991	0.130574	0.458656	1	0.49973	1	110.3	38.6	79.2	141	109.8	121.1	49.2	103.3	105.9	36.1	104.7	22.2	45	74.2	80.3	190.6	100.4	132.1	170.8	102.9	95.6	113.5	163.1	110.2	4781.52	10039.5	10295.1	3510.54
[K].GEVFNELVGKQR.[I]	1xBiotin [K10]	5	27	P05556	P05556 [229-240]	P05556 1xBiotin [K238]	Integrin beta-1 OS=Homo sapiens OX=9606 GN=ITGB1 PE=1 SV=2	1	1601.81	1.057	2.841	1.57	0.08	1.51	0.65	0.980953	0.637245	0.845236	1	1	1	85	58.7	77.7	89.8	166.9	122	83.6	67.1	73.4	244.1	42.7	50.7	81.2	59.2	67.1	145.6	74.9	77.5	144.1	131.3	145.6	89.7	117	105.3	32539.1	26133	28560.9	95031.8
[R].MVGKCYVR.[G]	1xBiotin [K4]; 1xCarbamidomethyl [C5]; 1xOxidation [M1]	2	3	P26006	P26006 [158-165]	P26006 1xBiotin [K161]	Integrin alpha-3 OS=Homo sapiens OX=9606 GN=ITGA3 PE=1 SV=5	1	1254.58	3.442	2.838	3.05	1.78	1.51	1.61	0.100194	0.186524	0.163958	0.481145	0.643435	0.686156	32.1	53.6	62.2	110.4	152	189.8	33.1	38.4	34	31.6	87.4	56.9	66.3	53.6	66.1	47.9	117.2	202.2	81.9	161.4	200.6	96.7	223.2	201.5	1560.94	1810.71	1604.24	1490.6
[R].NTQIYKAQAQTDR.[E]	1xBiotin [K6]	1	10	P01889	P01889 [87-99]	P01889 1xBiotin [K92]	HLA class I histocompatibility antigen, B alpha chain OS=Homo sapiens OX=9606 GN=HLA-B PE=1 SV=3	1	1762.85	2.083	2.822	1.872	1.06	1.5	0.9	0.610697	0.582687	0.777813	1	1	1	54.9	51.6	81.2	114.4	145.7	152.1	38.6	113.4	42.5	40	91.8	39.5	46.5	62.9	109	54.5	88.6	344.8	93.8	112.8	131.2	86.6	185.8	117.7	2515.17	7397.63	2773.52	2605.97
[R].LAGAPSEDPQFPKVQWPPR.[E]	1xBiotin [K13]	2	7	O00391	O00391 [488-506]	O00391 1xBiotin [K500]	Sulfhydryl oxidase 1 OS=Homo sapiens OX=9606 GN=QSOX1 PE=1 SV=3	1	2346.17	1.04	2.817	0.948	0.06	1.49	-0.08	0.995073	0.821352	0.998677	1	1	1	85	76.9	68.4	88.4	216.5	64.8	112.1	59.2	34.6	84.8	53.5	35.2	204.4	47.6	26.3	232.3	44.5	61.6	216.6	57.5	150.8	291.9	45.1	41.9	6910.55	3651.58	2136.1	5231.79
[R].TKASVHTLSGHTNAVATVR.[C]	1xBiotin [K2]	2	12	O43660	O43660 [319-337]	O43660 1xBiotin [K320]	Pleiotropic regulator 1 OS=Homo sapiens OX=9606 GN=PLRG1 PE=1 SV=1	1	2176.13	0.965	2.813	1.049	-0.05	1.49	0.07	0.99845	0.167733	0.973669	1	0.599944	1	109.3	53.3	88.8	105.4	150	93.1	54.9	121.3	105.4	70.6	51.5	11.1	31.5	85.6	122.2	81.6	101.7	157.2	59.2	287.1	144.7	89.9	142.9	81.5	13424.1	29666.9	25779.1	17261.6
[R].TKFETEQALR.[ML]	1xBiotin [K2]	2	9	P08727	P08727 [167-176]	P08727 1xBiotin [K168]	Keratin, type I cytoskeletal 19 OS=Homo sapiens OX=9606 GN=KRT19 PE=1 SV=4	1	1448.72	4.09	2.813	2.235	2.03	1.49	1.16	0.0793061	0.195026	0.322657	0.393582	0.667162	1	48.5	53.8	45.7	198.5	151.2	102.2	9.4	48.8	70	13.6	54.1	64.7	12.4	46	49.7	348	94.8	199.7	152.1	180.7	133.4	85.8	133.9	102.9	1729.94	9023.02	12934.1	2514.52
[RK].NKYEDEINKR.[T]	1xBiotin [K2]	7	1	P04264; P04259; P05787; P13647	P04264 [268-277]; P04259 [251-260]; P05787 [177-186]; P13647 [256-265]	P04264 1xBiotin [K269]; P04259 1xBiotin [K252]; P05787 1xBiotin [K178]; P13647 1xBiotin [K257]	Keratin, type II cytoskeletal 1 OS=Homo sapiens OX=9606 GN=KRT1 PE=1 SV=6 Keratin, type II cytoskeletal 6B OS=Homo sapiens OX=9606 GN=KRT6B PE=1 SV=5 Keratin, type II cytoskeletal 8 OS=Homo sapiens OX=9606 GN=KRT8 PE=1 SV=7 Keratin, type II cytoskeletal 5 OS=Homo sapiens OX=9606 GN=KRT5 PE=1 SV=3	2	1534.73	2.379	2.81	4.032	1.25	1.49	2.01	0.0686385	0.0741014	0.0130627	0.347093	0.345893	0.0889729	45.2	60.3	43.3	107.5	169.3	174.4	18.4	44	72.1	42.9	58.7	71	37.5	42.1	46	104.7	88.9	145.1	129.4	164.9	184.7	91	288.7	169.9	3697.03	8837.11	14475	8608.43
[R].VIKVITEPIPVSDLR.[V]	1xBiotin [K3]	3	6	Q12913	Q12913 [200-214]	Q12913 1xBiotin [K202]	Receptor-type tyrosine-protein phosphatase eta OS=Homo sapiens OX=9606 GN=PTPRJ PE=1 SV=3	1	1905.09	1.562	2.799	1.292	0.64	1.48	0.37	0.999998	0.507227	0.996878	1	1	1	81	61.8	68.8	126.5	173	88.8	189.9	62.8	67.7	51.7	33.9	85.7	192.1	57.5	33.4	154.7	105.7	57.2	144.6	66.4	214.5	137.8	70.3	74.2	8337.95	2756.84	2972.16	2267.32
[R].TQKLQGLIPGAR.[Y]	1xBiotin [K3]	4	6	P22105-1	P22105-1 [3807-3818]	P22105-1 1xBiotin [K3809]	Isoform 3 of Tenascin-X OS=Homo sapiens OX=9606 GN=TNXB	1	1507.84	2.391	2.791	1.527	1.26	1.48	0.61	0.256178	0.0605744	0.531803	0.952674	0.296216	1	53.9	52.3	86.5	128.9	146.1	132.2	50.4	31.3	112.5	51.1	48.9	35.8	80.8	127.7	30.7	114	120.4	160	136.5	121.9	179.8	93.1	181.8	123.4	3922.76	2441.31	8762.86	3979.14
[R].KPIAGGGGFSDK.[D]	1xBiotin [K1]	4	6	Q8TCZ2	Q8TCZ2 [137-148]	Q8TCZ2 1xBiotin [K137]	CD99 antigen-like protein 2 OS=Homo sapiens OX=9606 GN=CD99L2 PE=1 SV=1	0	1359.67	3.279	2.776	2.891	1.71	1.47	1.53	0.00451313	0.00963092	0.0350496	0.0337582	0.0646094	0.196602	57.9	43.9	48	189.8	121.7	138.7	58.4	39.9	69.4	30.6	44.2	55.6	29.8	68.1	48.4	218.9	167.7	191.5	119.7	155.6	122.8	67.9	171.5	139.9	2815.78	1924.11	3346.66	1477.81
[K].GTLVQTKGTGASGSFK.[L]	1xBiotin [K7]	5	7	P16401; P10412	P16401 [94-109]; P10412 [91-106]	P16401 1xBiotin [K100]; P10412 1xBiotin [K97]	Histone H1.5 OS=Homo sapiens OX=9606 GN=H1-5 PE=1 SV=3 Histone H1.4 OS=Homo sapiens OX=9606 GN=H1-4 PE=1 SV=2	1	1764.89	2.186	2.769	3.794	1.13	1.47	1.92	0.243328	0.0144268	0.00418959	0.928124	0.0917132	0.0332923	64.1	42.7	48.9	140.1	118.4	185.7	53.4	96.9	63.6	39.4	54.4	42.4	48.6	24.1	65.9	102.4	139.1	156.8	106.9	117.5	200.1	108.1	184.2	196.2	3191.74	5789.71	3801.89	2352.62
[K].ILHIKQDER.[V]	1xBiotin [K5]	3	1	P32004	P32004 [176-184]	P32004 1xBiotin [K180]	Neural cell adhesion molecule L1 OS=Homo sapiens OX=9606 GN=L1CAM PE=1 SV=2	1	1377.73	3.529	2.762	2.528	1.82	1.47	1.34	0.34371	0.809247	0.357713	1	1	1	43.9	43.6	67.2	155	120.4	169.9	24.3	34.9	37.9	105.8	31.8	34.6	31.3	53.6	53.4	27.5	123.2	390.2	95.7	214.5	50.6	102.5	135.1	253.1	1781.56	2559.54	2777.2	7755.6
[K].YIGVGKGGALELHGQK.[K]	1xBiotin [K6]	2	3	Q8WUJ3	Q8WUJ3 [142-157]	Q8WUJ3 1xBiotin [K147]	Cell migration-inducing and hyaluronan-binding protein OS=Homo sapiens OX=9606 GN=CEMIP PE=1 SV=2	1	1852.97	1.116	2.757	3.387	0.16	1.46	1.76	0.93945	0.0530093	0.399524	1	0.267047	1	50.2	74.3	49	56	204.7	165.9	52.3	54.9	47.9	42.8	80.4	77.4	77.5	51.1	46.3	58.4	131.2	46.6	213.4	215.3	196.5	46.3	172.9	188.8	2339.81	2454.53	2142.84	1914.75
[K].TIGGGDDSFNTFFSETGAGKHVPR.[A]	1xBiotin [K20]	8	2	P68363	P68363 [41-64]	P68363 1xBiotin [K60]	Tubulin alpha-1B chain OS=Homo sapiens OX=9606 GN=TUBA1B PE=1 SV=1	1	2723.25	0.819	2.751	0.813	-0.29	1.46	-0.3	0.975224	0.397764	0.99998	1	1	1	92.5	61.8	110.4	75.7	169.9	89.7	26.5	59	55.1	36.8	28.8	39.1	264.5	64.4	65.8	247.3	30.4	45.1	266.3	67.8	101.2	296.3	53.4	52.1	1543.13	3441.2	3211.33	2144.57
[R].LTEKTVFPLADVSR.[I]	1xBiotin [K4]	2	6	Q9UHN6	Q9UHN6 [1259-1272]	Q9UHN6 1xBiotin [K1262]	Cell surface hyaluronidase OS=Homo sapiens OX=9606 GN=CEMIP2 PE=1 SV=1	1	1801.95	1.546	2.734	2.425	0.63	1.45	1.28	0.513901	0.163971	0.0474805	1	0.59003	0.257668	66.5	61.3	59	102.8	167.5	143	44.9	67.5	58.4	45.8	78.6	53.8	83.1	51.8	48.6	71.8	137	90.3	171.8	83.1	147.1	125.6	109.2	331.6	2319.27	3481.01	3013.52	2360.79
[K].AAFQSQYKSHFVAASLSNQK.[A]	1xBiotin [K]	2	27	Q86XP3	Q86XP3 [701-720]	Q86XP3 1xBiotin [K]	ATP-dependent RNA helicase DDX42 OS=Homo sapiens OX=9606 GN=DDX42 PE=1 SV=1	1	2438.19	1.191	2.734	1.029	0.25	1.45	0.04	1	0.42154	0.989253	1	1	1	73.1	57.3	111.3	87.1	156.7	114.5	136.6	62.6	61	112.5	18.5	49	193.1	95.2	54.1	142.8	74.5	45.9	323.3	60.7	134.1	97.9	37.1	101.1	182194	83470.3	81418.1	150106
[K].VGKAVTLECVSAGEPR.[S]	1xBiotin [K3]; 1xCarbamidomethyl [C9]	1	11	P98160	P98160 [3126-3141]	P98160 1xBiotin [K3128]	Basement membrane-specific heparan sulfate proteoglycan core protein OS=Homo sapiens OX=9606 GN=HSPG2 PE=1 SV=4	1	1898.95	1.475	2.727	1.253	0.56	1.45	0.33	0.999543	0.124466	0.999036	1	0.48901	1	53.6	61.8	105.2	79.1	168.4	131.8	55.7	51.3	88.6	37.1	103.1	64.2	112.3	105.5	109.4	44.7	82.2	91.4	104.1	175.1	179.9	69.5	137	189	3564.87	3279.5	5665.38	2372.09
[R].ALKGIGTDEFTLNR.[I]	1xBiotin [K3]	1	3	P12429	P12429 [261-274]	P12429 1xBiotin [K263]	Annexin A3 OS=Homo sapiens OX=9606 GN=ANXA3 PE=1 SV=3	1	1760.9	0.862	2.723	0.88	-0.21	1.45	-0.18	0.99009	0.11558	0.999925	1	0.469895	1	95.9	57.5	110.3	82.7	156.6	97	55.4	106.9	87.7	52.6	44.3	92.9	136.2	100.8	70.7	163.7	75.6	72	203.8	102.1	143.1	88.7	65.2	138.3	2398.34	4626.3	3793.4	2274.63
[K].AVLKGGPLDGTYR.[L]	1xBiotin [K4]	1	2	P00918	P00918 [77-89]	P00918 1xBiotin [K80]	Carbonic anhydrase 2 OS=Homo sapiens OX=9606 GN=CA2 PE=1 SV=2	1	1572.82	1.1	2.716	2.788	0.14	1.44	1.48	0.999995	0.744416	0.461646	1	1	1	101	46.3	57	111.1	125.8	158.8	77.6	102.2	99.7	42.2	45.7	108.5	58.2	45.7	56.2	143.6	109.7	42.4	47.6	242.6	124.2	54.7	242.3	156.7	2977.21	3922.47	3824.29	1620.81
[K].LKAQNER.[E]	1xBiotin [K2]	1	2	Q8WUJ3	Q8WUJ3 [1142-1148]	Q8WUJ3 1xBiotin [K1143]	Cell migration-inducing and hyaluronan-binding protein OS=Homo sapiens OX=9606 GN=CEMIP PE=1 SV=2	1	1084.56	2.696	2.698	3.781	1.43	1.43	1.92	0.0728319	0.511102	0.0896865	0.366908	1	0.42011	33.3	55.8	56.6	89.8	150.5	214	31	24.6	37.9	47	51.9	189.8	52.7	86.4	52.1	60.6	83.6	133.5	132.3	140	149.6	199.1	212.6	115.2	2672.92	2123.27	3266.52	4050.32
[K].AGDSLMVMIAMKMEHTIK.[S]	1xBiotin [K]; 1xOxidation [M]	1	54	Q96RQ3	Q96RQ3 [670-687]	Q96RQ3 1xBiotin [K]	Methylcrotonoyl-CoA carboxylase subunit alpha, mitochondrial OS=Homo sapiens OX=9606 GN=MCCC1 PE=1 SV=3	1	2248.07	1.02	2.692	1.517	0.03	1.43	0.6	0.996497	0.892695	0.986242	1	1	1	96.9	68.5	60.1	98.9	184.4	91.2	59	11.7	45.5	4.8	32.2	56.8	405.7	28.3	2	440.7	46.5	9.7	287	22.1	86.7	183	42.9	35.5	51443.6	10159.1	39690.1	4174.83
[R].ITLSKHQNVQLPR.[E]	1xBiotin [K5]	3	4	P26599	P26599 [406-418]	P26599 1xBiotin [K410]	Polypyrimidine tract-binding protein 1 OS=Homo sapiens OX=9606 GN=PTBP1 PE=1 SV=1	1	1759.96	15.76	2.681	2.51	3.98	1.42	1.33	0.000111292	0.12683	0.0194109	0.00132656	0.495082	0.12237	11.6	63.1	49.1	183.6	169.2	123.3	10.4	6.4	9.9	69	53.9	40.5	12.7	41.9	50.5	153.4	156.7	161.1	119.9	144.5	242.7	80.8	105.2	340.5	2972.96	1827.94	2852.54	19783.9
[R].NKDVFQCEVR.[N]	1xBiotin [K2]; 1xCarbamidomethyl [C7]	3	6	P07093	P07093 [130-139]	P07093 1xBiotin [K131]	Glia-derived nexin OS=Homo sapiens OX=9606 GN=SERPINE2 PE=1 SV=1	1	1520.7	2.388	2.677	2.927	1.26	1.42	1.55	0.315602	0.099247	0.629636	1	0.428785	1	54.2	49.7	59.5	129.4	133	174.1	52.4	71.6	47.8	27.8	66.3	48.1	62.2	57.6	37.7	120	125.2	192.1	122.9	240.9	128.7	29.8	200.5	168.5	3059.8	4177.75	2790.81	1623.85
[K].TLNNKFASFIDK.[V]	1xBiotin [K5]	13	22	P08729; P35908; P04259; P05787; P13647	P08729 [97-108]; P35908 [184-195]; P04259 [169-180]; P05787 [97-108]; P13647 [174-185]	P08729 1xBiotin [K101]; P35908 1xBiotin [K188]; P04259 1xBiotin [K173]; P05787 1xBiotin [K101]; P13647 1xBiotin [K178]	Keratin, type II cytoskeletal 7 OS=Homo sapiens OX=9606 GN=KRT7 PE=1 SV=5 Keratin, type II cytoskeletal 2 epidermal OS=Homo sapiens OX=9606 GN=KRT2 PE=1 SV=2 Keratin, type II cytoskeletal 6B OS=Homo sapiens OX=9606 GN=KRT6B PE=1 SV=5 Keratin, type II cytoskeletal 8 OS=Homo sapiens OX=9606 GN=KRT8 PE=1 SV=7 Keratin, type II cytoskeletal 5 OS=Homo sapiens OX=9606 GN=KRT5 PE=1 SV=3	1	1623.82	1.652	2.669	2.494	0.72	1.42	1.32	0.976755	0.540995	0.99228	1	1	1	80.7	57.9	49.7	133.3	154.5	124	109.5	20.9	64.4	107.4	5.5	46.2	150.2	39.7	30.5	239.4	106.4	35.2	264.5	66.7	123.4	262.5	28.6	99	43748.2	8353.62	25750	42925.5
[R].KESYSVYVYK.[V]	1xBiotin [K1]	10	14	P58876	P58876 [35-44]	P58876 1xBiotin [K35]	Histone H2B type 1-D OS=Homo sapiens OX=9606 GN=H2BC5 PE=1 SV=2	1	1491.72	1.825	2.661	2.033	0.87	1.41	1.02	0.566768	0.115667	0.317441	1	0.469895	1	70.9	53.8	66.8	129.3	143.2	135.9	28.6	75.5	90	61.6	57.4	14.5	20.8	106.4	71.3	93.9	137.9	158.4	97.4	152.7	185.8	138.2	144.9	165	4119.46	10886.2	12970.2	8872.75
[-].MASLTVKAYLLGK.[E]	1xBiotin [K7]; 1xMet-loss+Acetyl [N-Term]	1	4	Q13501	Q13501 [1-13]	Q13501 1xBiotin [K7]; 1xMet-loss+Acetyl [N-Term]	Sequestosome-1 OS=Homo sapiens OX=9606 GN=SQSTM1 PE=1 SV=1	1	1531.86	1.828	2.646	0.891	0.87	1.4	-0.17	0.483216	0.0708691	0.987579	1	0.333134	1	63.3	60.9	105.2	115.6	161.2	93.7	64	71.3	61.7	76.4	60.2	61.6	133.3	106.4	81.5	179.9	55.3	116.9	163	107.9	185.1	115	65.7	94.8	2261.82	2521.18	2180.31	2701.07
[K].VSQTKGGEK.[I]	1xBiotin [K5]	2	1	Q8WUJ3	Q8WUJ3 [334-342]	Q8WUJ3 1xBiotin [K338]	Cell migration-inducing and hyaluronan-binding protein OS=Homo sapiens OX=9606 GN=CEMIP PE=1 SV=2	1	1159.58	1.445	2.64	1.792	0.53	1.4	0.84	0.798475	0.018231	0.0973019	1	0.113202	0.449474	74.2	64.9	65.3	107.3	171.2	117.1	97.2	73	72.9	63.8	72.3	45	59.7	72.4	64.3	105.5	70.7	163.3	104.5	171.5	168.5	115.2	182.7	97.6	3938.75	2959.96	2955.65	2585.82
[K].KGYTQQLAFR.[Q]	1xBiotin [K1]	1	6	P01024	P01024 [1051-1060]	P01024 1xBiotin [K1051]	Complement C3 OS=Homo sapiens OX=9606 GN=C3 PE=1 SV=2	1	1437.73	2.114	2.64	2.593	1.08	1.4	1.37	0.524852	0.0445364	0.0532416	1	0.233161	0.283177	53.4	59.1	60.9	112.9	155.9	157.9	54	51.8	86.3	36.5	73	59.7	26.1	75.9	61.5	95.2	116	114.1	103.5	157.6	245.6	89.9	193.6	159.5	3014.07	2895.3	4818.47	2036.84
[K].TSDFLKVLNR.[A]	1xBiotin [K6]	1	9	O15144	O15144 [270-279]	O15144 1xBiotin [K275]	Actin-related protein 2/3 complex subunit 2 OS=Homo sapiens OX=9606 GN=ARPC2 PE=1 SV=1	1	1418.75	2.632	2.546	3.161	1.4	1.35	1.66	0.0631941	0.0032359	0.00371755	0.32573	0.0258678	0.0303285	37.9	56	63.4	99.8	142.5	200.4	32.2	35.4	73.8	30.3	52.3	60.7	50.4	81.8	59.3	87.1	98.5	93.3	133.2	128.4	185.1	246.5	187.4	164.1	2127.86	2339.11	4871.83	1996.85
[K].AVKSSEHINEGETAMLVCK.[S]	1xBiotin [K3]; 1xCarbamidomethyl [C18]; 1xOxidation [M15]	4	20	P35613	P35613 [225-243]	P35613 1xBiotin [K227]	Basigin OS=Homo sapiens OX=9606 GN=BSG PE=1 SV=2	1	2345.09	3.094	2.535	1.303	1.63	1.34	0.38	0.511257	0.891625	0.967617	1	1	1	46.8	66.2	75.8	144.8	167.7	98.7	41.2	5.2	120.2	147.1	58.2	58	19.4	98.9	66.7	51.8	177.6	127.4	147.6	144.3	221.5	40.9	187	86.9	12093.3	1529.47	35279.4	43173.2
[R].GLDSKASLILR.[S]	1xBiotin [K5]	8	7	P23229	P23229 [982-992]	P23229 1xBiotin [K986]	Integrin alpha-6 OS=Homo sapiens OX=9606 GN=ITGA6 PE=1 SV=5	1	1398.78	0.947	2.532	1.484	-0.08	1.34	0.57	0.999939	0.0522458	0.847417	1	0.265202	1	89.4	62	83.4	84.6	157	123.7	108.5	56.9	91.7	95.4	38.5	63.6	145.5	60.8	85.5	86.9	90.1	61.8	161.1	169.2	114.6	114.1	126.9	128.9	10612.7	5562.41	8972.73	9335.54
[R].LFNDIHKFRD.[-]	1xBiotin [K7]	1	8	O00622	O00622 [372-381]	O00622 1xBiotin [K378]	CCN family member 1 OS=Homo sapiens OX=9606 GN=CCN1 PE=1 SV=1	2	1530.75	0.849	2.524	1.202	-0.24	1.34	0.26	0.999965	0.257088	0.969724	1	0.803331	1	97.9	71.2	76.4	83.1	179.6	91.8	94.5	77.3	98.5	68.7	51.2	155.8	73.8	53.3	102.4	75.6	80.2	102	106.6	173.5	204.5	67.9	88.7	125.6	46176.8	37758.7	48114.2	33581
[R].KFVALEGR.[H]	1xBiotin [K1]	2	3	Q8WUJ3	Q8WUJ3 [894-901]	Q8WUJ3 1xBiotin [K894]	Cell migration-inducing and hyaluronan-binding protein OS=Homo sapiens OX=9606 GN=CEMIP PE=1 SV=2	1	1145.61	1.53	2.518	2.721	0.61	1.33	1.44	0.920448	0.0455431	0.164706	1	0.2375	0.687131	68	64.9	53.7	104	163.3	146.1	45.7	65.1	84.9	62.1	86.7	40.6	51.4	120.5	43.1	107.9	55.4	99.6	125.1	232.7	156.4	139.9	159.7	123.2	4048.85	5766.8	7523.44	5505.34
[K].NEFSLKTFK.[R]	1xBiotin [K6]	3	5	O00339	O00339 [107-115]	O00339 1xBiotin [K112]	Matrilin-2 OS=Homo sapiens OX=9606 GN=MATN2 PE=1 SV=4	1	1339.67	1.567	2.509	1.654	0.65	1.33	0.73	0.991374	0.107584	0.738311	1	0.450232	1	82.1	54.1	75.1	128.6	135.7	124.3	140	81.2	63.1	113.7	53.5	25.6	84.9	60.7	74.3	127.2	74.2	132.8	121	134.2	163.2	83.1	144.7	122.9	9842.39	5709.76	4438.75	7993.66
[R].GDKACQACPR.[G]	1xBiotin [K3]; 2xCarbamidomethyl [C5; C8]	3	5	O15197	O15197 [310-319]	O15197 1xBiotin [K312]	Ephrin type-B receptor 6 OS=Homo sapiens OX=9606 GN=EPHB6 PE=1 SV=4	1	1388.59	1.144	2.495	0.962	0.19	1.32	-0.06	1	0.0283151	0.998522	1	0.162782	1	108.6	54.1	90.8	124.1	135.1	87.3	164.6	93.3	105.2	21.9	82.8	52.5	88	102.8	81.6	120.3	92.6	152.8	103.4	130.9	161	64.1	84.6	97.7	11341.1	6429.11	7248.38	1510.68
[K].FLSGKGLVIYPK.[I]	1xBiotin [K5]	1	8	P98172	P98172 [44-55]	P98172 1xBiotin [K48]	Ephrin-B1 OS=Homo sapiens OX=9606 GN=EFNB1 PE=1 SV=1	1	1547.87	1.897	2.465	2.185	0.92	1.3	1.13	0.204801	0.0258174	0.081847	0.81859	0.151167	0.39589	67.5	61.3	60.3	128.1	151.1	131.7	52.1	69.8	92.1	63.4	35.2	68.3	84.2	34.5	62.3	172	132.5	104.4	156.2	104.2	180.9	136.1	96.1	155.6	2935.09	3930.41	5185.86	3566.52
[R].VNFAMNVGKAR.[G]	1xBiotin [K9]	3	5	P14618	P14618 [490-500]	P14618 1xBiotin [K498]	Pyruvate kinase PKM OS=Homo sapiens OX=9606 GN=PKM PE=1 SV=4	1	1432.72	2.399	2.465	1.836	1.26	1.3	0.88	0.0640434	0.153115	0.734208	0.327578	0.561563	1	57.2	58.3	71.9	137.2	143.6	131.9	38.8	66.7	52	39.2	98.8	53	130.3	59.3	65.3	91.1	124.7	209.6	110.4	130.6	155	86.1	169.1	120	1644.42	2825.63	2202.08	1659.05
[K].YMGKGSMTGLALK.[H]	1xBiotin [K4]; 1xOxidation [M]	4	11	O00339	O00339 [727-739]	O00339 1xBiotin [K730]	Matrilin-2 OS=Homo sapiens OX=9606 GN=MATN2 PE=1 SV=4	1	1598.77	1.29	2.459	1.47	0.37	1.3	0.56	0.671814	0.120572	0.772376	1	0.481353	1	62.9	74.7	80	81.2	183.7	117.6	34.1	61.7	108.8	93.6	73.3	69.8	69.4	78.5	94.5	79.6	116.9	78.1	128.5	180.2	182.5	78.7	115.4	156.2	3018.24	5462.79	9631.28	8284.84
[K].KLEDGPKFLK.[S]	1xBiotin [K7]	2	12	P68104	P68104 [386-395]	P68104 1xBiotin [K392]	Elongation factor 1-alpha 1 OS=Homo sapiens OX=9606 GN=EEF1A1 PE=1 SV=1	2	1400.76	1.931	2.455	2.27	0.95	1.3	1.18	0.161694	0.450866	0.465777	0.668536	1	1	78.4	54.2	55.9	151.5	133	126.9	10.5	82.6	92.4	57	71.3	35.8	26.9	58.9	87.6	202.5	118.6	159.4	108.1	154.3	140	98.3	133.6	162.3	2797.19	21985.7	24606.2	15186.2
[R].LKYSILQQTPR.[S]	1xBiotin [K2]	2	10	Q14574	Q14574 [280-290]	Q14574 1xBiotin [K281]	Desmocollin-3 OS=Homo sapiens OX=9606 GN=DSC3 PE=1 SV=3	1	1572.86	4.808	2.434	2.897	2.27	1.28	1.53	0.0786526	0.379327	0.582991	0.391796	1	1	35.2	53.4	54.5	169.1	129.9	157.9	17.3	35.9	89.4	54.4	85.4	27.1	44.1	55.6	86.6	108.6	194.9	172.5	107.7	139.7	132.5	53	234.4	161.1	1724.03	3585.14	8935.26	5438.49
[K].EGLELLKTAIGK.[A]	1xBiotin [K7]	2	7	P06733	P06733 [222-233]	P06733 1xBiotin [K228]	Alpha-enolase OS=Homo sapiens OX=9606 GN=ENO1 PE=1 SV=2	1	1497.83	1.34	2.423	1.252	0.42	1.28	0.32	0.996209	0.989207	1	1	1	1	66.4	74.2	84.7	89	179.7	106.1	149.9	64.4	40.1	122.7	72	70.6	178.7	32	82.2	151.2	86.3	63.1	177.5	51.9	174.4	144.5	35.5	102.9	8385.02	3603.92	2244.01	6859.44
[R].FPKPPQPIILR.[D]	1xBiotin [K3]	1	1	O15230	O15230 [1225-1235]	O15230 1xBiotin [K1227]	Laminin subunit alpha-5 OS=Homo sapiens OX=9606 GN=LAMA5 PE=1 SV=8	0	1531.88	1.546	2.421	1.526	0.63	1.28	0.61	0.655092	0.0428547	0.531138	1	0.227028	1	61.5	58	97	95	140.4	148.1	63.6	39.9	78	37.2	63.4	60	128.7	42.5	100.4	146.2	98.4	56.6	145.3	142.3	166.4	175.4	102.5	153.3	2449.01	1535.52	3002.73	1430.99
[R].QTVAVGVIKAVDK.[K]	1xBiotin [K9]	2	4	P68104	P68104 [431-443]	P68104 1xBiotin [K439]	Elongation factor 1-alpha 1 OS=Homo sapiens OX=9606 GN=EEF1A1 PE=1 SV=1	1	1553.87	1.48	2.406	0.517	0.57	1.27	-0.95	0.743145	0.119241	0.999585	1	0.478037	1	72.6	67.1	126.2	107.4	161.4	65.2	101	59.6	66.9	80.9	48.2	61.8	55.4	116.2	118	156.6	93	98.9	170.2	132.6	148.6	178.4	60.1	53.7	3494.13	2059.64	2311.98	2796.54
[K].ISVLGKGSMR.[D]	1xBiotin [K6]; 1xOxidation [M9]	2	5	Q07666	Q07666 [195-204]	Q07666 1xBiotin [K200]	KH domain-containing, RNA-binding, signal transduction-associated protein 1 OS=Homo sapiens OX=9606 GN=KHDRBS1 PE=1 SV=1	1	1289.67	3.365	2.397	7.041	1.75	1.26	2.82	0.50578	0.26672	0.0335997	1	0.822336	0.191691	35.9	58.7	30.4	120.8	140.6	213.7	33	56.5	30	57.8	53.9	53	27.9	26.6	34.2	24.9	110.9	251.5	108.1	300	129.1	98	208.5	196.2	2247.79	3852.47	2049.1	3942.13
[R].YTKLSDPANWLK.[I]	1xBiotin [K3]	2	3	P19022	P19022 [534-545]	P19022 1xBiotin [K536]	Cadherin-2 OS=Homo sapiens OX=9606 GN=CDH2 PE=1 SV=4	1	1661.84	1.509	2.392	2.04	0.59	1.26	1.03	0.697992	0.544633	0.735381	1	1	1	65.9	56	80.5	99.4	133.9	164.3	63.7	50	77	77	54.1	31.1	77.8	78.2	42.1	223	86.4	96.1	202	54.4	129.4	255.6	43.4	158.7	3059.45	2404.47	3701.35	3702.74
[K].DFPIAKGER.[Q]	1xBiotin [K6]	1	8	P00918	P00918 [19-27]	P00918 1xBiotin [K24]	Carbonic anhydrase 2 OS=Homo sapiens OX=9606 GN=CA2 PE=1 SV=2	1	1258.62	1.078	2.383	2.046	0.11	1.25	1.03	1	0.148818	0.110911	1	0.551587	0.505344	89.6	65.4	63.2	96.6	155.9	129.2	86	93.8	129.9	24.9	93.7	68.5	73.1	24.9	66.1	101.1	100.6	109.9	90.4	163.2	171.6	161.2	105.7	135.2	11992.6	13078.5	18115.2	3470.65
[R].EAPHVKNNAIISLR.[K]	1xBiotin [K6]	1	6	Q9ULF5	Q9ULF5 [312-325]	Q9ULF5 1xBiotin [K317]	Zinc transporter ZIP10 OS=Homo sapiens OX=9606 GN=SLC39A10 PE=1 SV=2	1	1787.96	4.41	2.38	1.947	2.14	1.25	0.96	0.00111324	0.013286	0.342451	0.009713	0.0856851	1	36.3	61.5	66.4	160.1	146.4	129.3	30.7	34.6	30.9	31.6	52.3	67.3	56.5	122.2	53.9	126.1	194.5	136.2	124.5	213.6	122.2	110	96.2	196.6	3222.18	3637.49	3243.84	3313.5
[K].QCSKEDGGGWWYNR.[C]	1xBiotin [K4]; 1xCarbamidomethyl [C2]	1	10	P02675	P02675 [423-436]	P02675 1xBiotin [K426]	Fibrinogen beta chain OS=Homo sapiens OX=9606 GN=FGB PE=1 SV=2	1	1968.81	2.804	2.38	1.025	1.49	1.25	0.04	0.0920454	0.281141	0.99331	0.447488	0.853008	1	51.3	70.7	81.9	143.8	168.3	84	46.5	55.7	48.4	91.5	59.5	66.7	181.5	77.2	62.6	114.1	135.6	136.3	158.8	111.8	172.8	160	41.7	79.2	2708.25	3242.35	2816.23	5331.18
[-].MFAKAFR.[V]	1xAcetyl [N-Term]; 1xBiotin [K4]	2	5	P41214	P41214 [1-7]	P41214 1xAcetyl [N-Term]; 1xBiotin [K4]	Eukaryotic translation initiation factor 2D OS=Homo sapiens OX=9606 GN=EIF2D PE=1 SV=3	1	1138.55	1.877	2.375	1.573	0.91	1.25	0.65	0.142305	0.00320131	0.246592	0.61882	0.0257455	0.937893	67.7	55.1	85.2	127.1	130.8	134.1	61.7	66.3	77.1	59.7	35.1	53.9	84.3	62.9	83.4	155.7	94.4	124.3	238	128	94.3	111.6	131.2	138.3	2911.19	3127.95	3641.29	2818.12
[R].HYGGLTGLNKAETAAK.[H]	1xBiotin [K10]	3	2	Q8N0Y7	Q8N0Y7 [91-106]	Q8N0Y7 1xBiotin [K100]	Probable phosphoglycerate mutase 4 OS=Homo sapiens OX=9606 GN=PGAM4 PE=3 SV=1	1	1856.93	1.774	2.371	0.811	0.83	1.25	-0.3	0.212367	0.0269362	0.999999	0.846298	0.15703	1	82.1	56.4	100.6	145.6	133.7	81.6	45.6	78.2	93.7	79.5	53.7	33.3	95.9	83.7	98	164.6	138.8	106.9	181.7	126	127.4	61.2	77.8	154	1927.3	3307.9	3961.1	3360.69
[R].KGTDVPK.[W]	1xBiotin [K1]	3	4	P07355	P07355 [206-212]	P07355 1xBiotin [K206]	Annexin A2 OS=Homo sapiens OX=9606 GN=ANXA2 PE=1 SV=2	1	970.503	1.809	2.371	2.299	0.86	1.25	1.2	0.308724	0.344502	0.132274	1	0.995475	0.575197	63.4	60.5	66.1	114.6	143.5	151.9	59.3	66.3	52.4	158.4	56.6	47.1	65.2	59	61.8	99.9	107.2	121.8	97.8	189.8	134.2	89.8	191.2	142.2	12813.9	14341.7	11333	34235.4
[K].FKVEYHAGGSTQNSIK.[V]	1xBiotin [K2]	4	3	P55263	P55263 [73-88]	P55263 1xBiotin [K74]	Adenosine kinase OS=Homo sapiens OX=9606 GN=ADK PE=1 SV=2	1	1991.96	2.355	2.366	2.562	1.24	1.24	1.36	0.238293	0.032223	0.123239	0.913938	0.181384	0.544783	53.6	57.9	63.2	126.2	137.1	161.9	74.2	56.6	59.4	64.2	27.6	69.3	70.1	70.8	44.8	81.1	173.3	139.9	120.3	156.6	152	78.4	181.8	179.5	3832.21	2922.49	3068.62	3316.79
[R].WTSPDYTMWKNVGK.[E]	1xBiotin [K]; 1xOxidation [M8]	2	2	Q9NT68	Q9NT68 [2437-2450]	Q9NT68 1xBiotin [K]	Teneurin-2 OS=Homo sapiens OX=9606 GN=TENM2 PE=1 SV=3	1	1954.88	1.081	2.365	1.081	0.11	1.24	0.11	0.995978	0.0284106	0.999991	1	0.162782	1	102.1	57.3	93.5	110.3	135.6	101.2	98.2	72.4	142.1	75.9	49.3	55.2	90.1	128	76.8	54.7	106.2	124	129.1	130.5	164.6	79.4	126.1	97.4	2896.12	2133.77	4188.72	2238.21
[K].GGVAGGSILKGVLK.[V]	1xBiotin [K10]	3	2	P41091	P41091 [276-289]	P41091 1xBiotin [K285]	Eukaryotic translation initiation factor 2 subunit 3 OS=Homo sapiens OX=9606 GN=EIF2S3 PE=1 SV=3	1	1481.85	3.156	2.364	2.088	1.66	1.24	1.06	0.000188511	0.00426375	0.00162961	0.00208005	0.0321588	0.0146995	39.3	62.6	73.2	124.1	148	152.8	34.4	42.5	39.4	71	60.2	62.8	76.9	73.3	47.6	157.5	124.4	90.3	148.4	159.9	124.9	125.6	153.2	207.6	1604.09	1979.42	1835.95	3309.7
[K].YMGKGSMTGLALK.[H]	1xBiotin [K4]; 2xOxidation [M2; M7]	4	1	O00339	O00339 [727-739]	O00339 1xBiotin [K730]	Matrilin-2 OS=Homo sapiens OX=9606 GN=MATN2 PE=1 SV=4	1	1614.77	1.543	2.361	2.092	0.63	1.24	1.06	0.717747	0.632287	0.738809	1	1	1	68.6	55.1	77.8	105.8	130	162.7	81	33.8	73.6	121.4	34.7	59.1	79.4	92.5	83.5	65.3	113.6	133.8	65.8	139.5	158.9	78.8	174.7	210.6	9176.65	3825.92	8344.19	13761.9
[R].EVVDKYSLIMK.[V]	1xBiotin [K5]	2	6	Q14574	Q14574 [314-324]	Q14574 1xBiotin [K318]	Desmocollin-3 OS=Homo sapiens OX=9606 GN=DSC3 PE=1 SV=3	1	1550.8	1.938	2.357	1.684	0.95	1.24	0.75	0.2288	0.107393	0.19537	0.885357	0.450232	0.785598	76.3	56.3	69.6	147.8	132.8	117.2	62	77.8	56.7	45.8	38.9	66.9	56.6	90.9	43.9	189.7	120.1	111.4	107.9	99.3	162.8	95.2	83.9	290.2	2815.61	3533.62	2574.62	2079.5
[K].GQPLCVLSAMKMETVVTSPMEGTVR.[K]	1xBiotin [K11]; 1xCarbamidomethyl [C5]	1	14	P11498	P11498 [1134-1158]	P11498 1xBiotin [K1144]	Pyruvate carboxylase, mitochondrial OS=Homo sapiens OX=9606 GN=PC PE=1 SV=2	1	2947.42	2.442	2.345	4.208	1.29	1.23	2.07	0.830525	0.956021	0.99999	1	1	1	70.2	54.2	34	171.4	127.2	143	10.8	11.1	9.4	7.1	11.3	8.4	479.9	4.8	5.2	787.8	26.5	9.3	215	5.6	19.6	159.5	6.3	22.1	3861.21	3954.19	3351.05	2524.46
[R].KGSPDDVEFK.[S]	1xBiotin [K1]	4	6	O00241	O00241 [125-134]	O00241 1xBiotin [K125]	Signal-regulatory protein beta-1 OS=Homo sapiens OX=9606 GN=SIRPB1 PE=1 SV=5	1	1347.62	3.644	2.331	2.455	1.87	1.22	1.3	0.487602	0.222138	0.553198	1	0.732232	1	41.1	50.7	69.5	149.8	118.1	170.7	38.9	40.1	49.1	49.4	31	62.6	67.8	43.6	125.5	33.6	175.5	146.2	115.2	97.5	213.4	81.8	166.5	262.3	1891.1	1951.73	2387.28	2405.25
[K].ESEVTVGGLEPGHKYK.[M]	1xBiotin [K]	3	6	P22105-1	P22105-1 [1422-1437]	P22105-1 1xBiotin [K]	Isoform 3 of Tenascin-X OS=Homo sapiens OX=9606 GN=TNXB	1	1955.95	2.89	2.327	1.979	1.53	1.22	0.99	0.18823	0.256257	0.597901	0.76282	0.803059	1	39.4	60.8	82	113.9	141.6	162.2	62.1	32.6	39	144.1	60.2	34.3	45.1	81.1	121.7	112.8	79.1	122	140.2	173.6	135.6	90.2	165.5	160.6	3727.81	1958.78	2344.33	8657.08
[K].GKSHKPVGCLGEAGHVLSK.[V]	1xBiotin [K]; 1xCarbamidomethyl [C9]	1	10	P23352	P23352 [528-546]	P23352 1xBiotin [K]	Anosmin-1 OS=Homo sapiens OX=9606 GN=ANOS1 PE=1 SV=3	1	2187.12	3.258	2.307	2.326	1.7	1.21	1.22	0.0433917	0.528632	0.0875808	0.239371	1	0.414627	55.5	66.7	43.1	180.7	153.9	100.1	28.6	66.2	58	60.2	70.1	69.8	11.4	76.9	45	177.9	189	189.6	86.3	166.6	161	88.6	104.7	150.1	7402.57	17111.7	15008.2	15562.6
[R].GKSPSDCCHNQCAAGCTGPR.[E]	1xBiotin [K2]; 4xCarbamidomethyl [C7; C8; C12; C16]	4	5	P00533	P00533 [225-244]	P00533 1xBiotin [K226]	Epidermal growth factor receptor OS=Homo sapiens OX=9606 GN=EGFR PE=1 SV=2	1	2445.96	3.374	2.285	1.542	1.75	1.19	0.63	0.15447	0.576418	0.658197	0.644429	1	1	41.2	32.4	123.2	139	74.1	190	126.1	31.4	39.2	27.3	50.8	30.8	43	117.1	123.4	227.8	128.3	132.1	53.4	84.8	70.4	87.9	180.6	245.6	8172.55	2031.86	2537.6	1768.77
[K].EIPAKIIFEDDR.[C]	1xBiotin [K5]	1	16	P49773	P49773 [26-37]	P49773 1xBiotin [K30]	Adenosine 5'-monophosphoramidase HINT1 OS=Homo sapiens OX=9606 GN=HINT1 PE=1 SV=2	1	1671.84	0.779	2.283	0.871	-0.36	1.19	-0.2	0.999981	0.987476	0.99876	1	1	1	125.9	45.8	120.7	98	104.6	105.1	141.7	51.4	99.4	237.8	23.3	36.2	114	87.4	95.3	288.7	77.4	42.6	122.6	57.3	82.6	83	61.3	97.8	15850.1	5749.45	11119.4	26592.7
[K].KQAGPASVPLR.[T]	1xBiotin [K1]	1	5	P30101	P30101 [130-140]	P30101 1xBiotin [K130]	Protein disulfide-isomerase A3 OS=Homo sapiens OX=9606 GN=PDIA3 PE=1 SV=4	1	1349.74	3.138	2.278	2.421	1.65	1.19	1.28	0.104456	0.406895	0.310712	0.491016	1	1	44.9	55.6	67.7	140.9	126.8	164	44.7	24.3	94.2	55.4	112.7	38.4	67.5	81	63.8	78.7	140.4	180	105.4	134.8	126.2	178.8	163.3	110.5	2892.46	1572.37	6090.9	3582.86
[K].FETLQAQAGKHGDDLR.[N]	1xBiotin [K10]	1	19	P08729	P08729 [287-302]	P08729 1xBiotin [K296]	Keratin, type II cytoskeletal 7 OS=Homo sapiens OX=9606 GN=KRT7 PE=1 SV=5	1	2011.97	2.336	2.26	2.609	1.22	1.18	1.38	0.559356	0.33096	0.255725	1	0.971058	0.961669	50.5	63.8	61.9	118	144.2	161.6	14.2	53.5	97.2	13.9	67.5	70.3	12	91	65.6	135.6	91.4	124.9	210.6	152.6	95.4	144.6	188.6	171.1	4080.89	15334.6	27880.8	3988.06
[R].AAFVSEQQQKLSR.[L]	1xBiotin [K10]	2	58	P26006	P26006 [629-641]	P26006 1xBiotin [K638]	Integrin alpha-3 OS=Homo sapiens OX=9606 GN=ITGA3 PE=1 SV=5	1	1717.87	1.09	2.26	1.733	0.12	1.18	0.79	1	0.0868107	0.470654	1	0.3876	1	87.3	63	77.6	95.2	142.3	134.5	85.5	83.1	111.5	61.7	81.7	53.8	55.6	130.8	76	119.5	71.5	93.2	99.4	139.3	152.8	91.3	131.7	161.8	153773	149435	200664	110916
[K].KPAAAAAPGTAEK.[L]	1xBiotin [K1]	1	6	P50454	P50454 [23-35]	P50454 1xBiotin [K23]	Serpin H1 OS=Homo sapiens OX=9606 GN=SERPINH1 PE=1 SV=2	0	1408.73	1.65	2.258	1.925	0.72	1.17	0.94	0.960483	0.130641	0.337012	1	0.49973	1	75.9	50.2	80.5	125.2	113.4	154.9	78.2	79.6	82.3	46	73.5	52.7	53.8	89.8	84.5	49.6	158.8	131.4	119	163.3	102.5	85.4	162.6	187	2844.87	2896.73	2991.98	1672.93
[R].KWDPYK.[Q]	1xBiotin [K1]	1	16	P02675	P02675 [295-300]	P02675 1xBiotin [K295]	Fibrinogen beta chain OS=Homo sapiens OX=9606 GN=FGB PE=1 SV=2	1	1062.51	1.3	2.257	1.046	0.38	1.17	0.06	0.863751	0.117551	0.992955	1	0.47411	1	83.2	51.8	117.2	108.2	116.9	122.6	68.4	84.3	87.5	52.5	83.1	45.6	58.8	152.5	118.7	109.6	78.7	136.3	118.4	121.3	117.8	79.3	163	124.2	26746.6	32972.4	34231.9	20519
[R].YKLLLYGLHHGK.[R]	1xBiotin [K2]	3	4	P22105-1	P22105-1 [1840-1851]	P22105-1 1xBiotin [K1841]	Isoform 3 of Tenascin-X OS=Homo sapiens OX=9606 GN=TNXB	1	1667.91	4.154	2.255	0.989	2.05	1.17	-0.02	0.0628959	0.587228	0.902229	0.32545	1	1	43.3	52.5	103.7	179.7	118.3	102.6	39.9	63	39.9	152.1	48.4	32.1	38.1	95.7	113.1	165.8	178.8	132.6	109.1	137	103.1	94.6	78	178.7	2108.41	3331.48	2110.62	8044.95
[R].KSGLSSR.[V]	1xBiotin [K1]	8	3	P23229	P23229 [569-575]	P23229 1xBiotin [K569]	Integrin alpha-6 OS=Homo sapiens OX=9606 GN=ITGA6 PE=1 SV=5	1	960.493	1.224	2.253	1.784	0.29	1.17	0.84	0.604436	0.124908	0.297535	1	0.48901	1	73.4	64.1	81.9	89.8	144.5	146.2	51.9	71.1	69.3	119.4	60.5	55.7	94.5	77.3	66.6	84.8	82.7	113.3	136.4	180.9	116.3	85.2	196.3	138	11012.7	15078.5	14696	25326.8
[R].FLEQQNKLLETK.[WL]	1xBiotin [K7]	6	20	P08729	P08729 [111-122]	P08729 1xBiotin [K117]	Keratin, type II cytoskeletal 7 OS=Homo sapiens OX=9606 GN=KRT7 PE=1 SV=5	1	1716.9	1.765	2.238	1.366	0.82	1.16	0.45	0.0660476	0.18724	0.785848	0.335261	0.644241	1	67.6	63.4	87.8	119.2	141.9	120	20.6	68.8	82.3	61.5	86	64.6	99.9	64.7	89.5	121.5	138	105	127.7	144.6	160.4	144.7	97.8	122.3	3032.21	10155.1	12140.3	9069.12
[R].NFNSAKDMK.[K]	1xBiotin [K6]; 1xOxidation [M8]	4	12	O00339	O00339 [711-719]	O00339 1xBiotin [K716]	Matrilin-2 OS=Homo sapiens OX=9606 GN=MATN2 PE=1 SV=4	1	1296.57	1.504	2.229	1.918	0.59	1.16	0.94	0.954022	0.102105	0.253953	1	0.43689	0.961669	73.7	66.7	68.6	110.8	148.7	131.5	71.2	150.5	65.9	55.1	67.8	64.5	53.2	97.5	66.3	107.2	107.1	113.8	84	170.2	143.8	91.2	163.5	127.1	11796.4	24918.8	10915.7	9128.6
[K].KQSLENFLSR.[F]	1xBiotin [K1]	2	10	Q76M96	Q76M96 [765-774]	Q76M96 1xBiotin [K765]	Coiled-coil domain-containing protein 80 OS=Homo sapiens OX=9606 GN=CCDC80 PE=1 SV=1	1	1447.74	1.088	2.225	1.792	0.12	1.15	0.84	0.98443	0.999037	0.87917	1	1	1	71.7	67.1	83.8	78	149.3	150.2	72	55.7	105.7	67.4	38.3	188.8	72.1	86.3	84.1	20.3	91.1	78.3	214	149.9	27.4	110.8	150.8	187.2	6971.68	5394.28	10237.7	6525.9
[K].NYGKTILTK.[E]	1xBiotin [K4]	2	2	P78536	P78536 [389-397]	P78536 1xBiotin [K392]	Disintegrin and metalloproteinase domain-containing protein 17 OS=Homo sapiens OX=9606 GN=ADAM17 PE=1 SV=1	1	1263.68	1.425	2.211	1.611	0.51	1.14	0.69	0.980846	0.108908	0.946112	1	0.451431	1	91.8	55.3	76.5	130.8	122.2	123.3	80.2	119.3	95.1	7.9	91.3	57.3	63.3	79.7	79.3	135.6	149.2	114.3	125.8	126.6	134.5	75.2	137.5	127.8	15947.4	23715.2	18908.5	1570.17
[K].KLVWIPSER.[H]	1xBiotin [K1]	5	6	P35580	P35580 [34-42]	P35580 1xBiotin [K34]	Myosin-10 OS=Homo sapiens OX=9606 GN=MYH10 PE=1 SV=3	1	1353.73	1.34	2.193	1.471	0.42	1.13	0.56	0.974689	0.205104	0.551384	1	0.689708	1	82.6	60.2	86.8	110.7	132	127.7	74.2	82.1	106.9	39.8	97.5	59.9	35.7	86.3	131.7	127.1	110	88.7	137.2	116	131.3	127	93.7	155	3509.21	3884.67	5053.7	1881.93
[K].LLGIETPLPKK.[E]	1xBiotin [K]	1	30	P05362	P05362 [57-67]	P05362 1xBiotin [K]	Intercellular adhesion molecule 1 OS=Homo sapiens OX=9606 GN=ICAM1 PE=1 SV=2	1	1434.84	1.04	2.188	1.061	0.06	1.13	0.09	0.987807	0.0537301	0.604828	1	0.269661	1	78.6	83.5	84.1	81.8	182.7	89.3	71.6	79.4	71.8	76.2	69.6	77.5	99.5	56.8	76.8	74.7	118.9	70.7	130.8	166.8	192.2	81.5	80.7	204.7	15779.9	17495.9	15817.1	16798.9
[K].TEWLDGKHVVFGK.[V]	1xBiotin [K7]	2	15	P62937	P62937 [119-131]	P62937 1xBiotin [K125]	Peptidyl-prolyl cis-trans isomerase A OS=Homo sapiens OX=9606 GN=PPIA PE=1 SV=2	1	1741.87	0.651	2.187	0.9	-0.62	1.13	-0.15	0.987406	0.791752	0.992265	1	1	1	119.5	61.3	109.1	77.8	134	98.2	127.3	104.3	92.8	129.2	28.7	53.5	142.6	73.2	95.3	190.2	67.9	36.6	229.7	53.3	117	136.6	36	85.7	37722.4	30904	27488.1	38288
[R].KDLYANTVLSGGTTMYPGIADR.[M]	1xBiotin [K1]; 1xOxidation [M15]	2	1	P60709	P60709 [291-312]	P60709 1xBiotin [K291]	Actin, cytoplasmic 1 OS=Homo sapiens OX=9606 GN=ACTB PE=1 SV=1	1	2585.24	1.171	2.185	1.295	0.23	1.13	0.37	0.934338	0.35579	0.946442	1	1	1	109.4	58.6	76.5	128.1	128.1	99.2	93.1	64.4	108	41.9	53.5	49.9	65.1	57.8	83.9	380.2	47.1	109	152.6	108.9	82.3	143.5	84.3	74.4	3527.36	2441.98	4094.64	1588.45
[K].LMSFLKLEK.[G]	1xBiotin [K6]	2	1	Q76M96	Q76M96 [222-230]	Q76M96 1xBiotin [K227]	Coiled-coil domain-containing protein 80 OS=Homo sapiens OX=9606 GN=CCDC80 PE=1 SV=1	1	1334.72	1.394	2.173	1.084	0.48	1.12	0.12	0.560818	0.0400518	0.9795	1	0.215601	1	80.5	65	96.6	112.2	141.2	104.7	44.4	84.7	93.1	70.7	68.4	53.9	118	68.9	101.6	139.6	118.1	68.7	168.4	117.3	148.6	110.2	88.3	137.2	2550.12	4866.05	5346.9	4060.53
[R].KTVTAMDVVYALK.[R]	1xBiotin [K1]	1	2	P62805	P62805 [80-92]	P62805 1xBiotin [K80]	Histone H4 OS=Homo sapiens OX=9606 GN=H4C1 PE=1 SV=2	1	1664.88	2.276	2.168	1.635	1.19	1.12	0.71	0.631928	0.598556	0.858163	1	1	1	62.2	68.2	68.3	141.7	147.8	111.7	81.6	58.1	60	83	65.8	41.9	68.4	29.2	65.9	231.9	136.7	83.4	245.7	65.8	142.6	201.8	30.3	107.8	4018.45	2864.39	2958.25	4088.32
[K].FHHKMVDNR.[G]	1xBiotin [K4]	1	1	P50454	P50454 [214-222]	P50454 1xBiotin [K217]	Serpin H1 OS=Homo sapiens OX=9606 GN=SERPINH1 PE=1 SV=2	1	1409.66	1.416	2.153	1.867	0.5	1.11	0.9	0.816033	0.307547	0.965565	1	0.912539	1	51.7	64.8	94.5	73.2	139.4	176.4	69.5	35.8	43.2	54.2	47.2	80.1	72.2	79.1	89.7	57.9	61.2	152.9	300.2	105.5	116.7	39.2	147.6	247.7	3220.5	1656.56	2003.96	2511.61
[K].EYTDKAHFSSK.[C]	1xBiotin [K5]	5	6	P25445	P25445 [90-100]	P25445 1xBiotin [K94]	Tumor necrosis factor receptor superfamily member 6 OS=Homo sapiens OX=9606 GN=FAS PE=1 SV=1	1	1538.69	2.363	2.147	3.058	1.24	1.1	1.61	0.14465	0.172017	0.0696329	0.624853	0.610752	0.350081	57.3	66.7	48.6	135.4	143.2	148.7	60.2	34.4	69.3	70	111.1	30.2	55.4	51.1	35.7	78.9	142.2	194.1	150.4	191.8	110.4	93.9	156.1	164.6	3274.66	1873.47	3770.91	3810.01
[R].LLLITAPKAENNMYVQQR.[D]	1xBiotin [K8]; 1xOxidation [M13]	2	1	Q76M96	Q76M96 [625-642]	Q76M96 1xBiotin [K632]	Coiled-coil domain-containing protein 80 OS=Homo sapiens OX=9606 GN=CCDC80 PE=1 SV=1	1	2344.22	1.024	2.144	1.212	0.03	1.1	0.28	0.99559	0.24054	0.739218	1	0.774103	1	75.3	70.7	101.9	77.1	151.6	123.5	159.5	76.2	66.7	71.6	42.6	81.4	38.1	105	103.1	90.7	78	69.5	153.5	101.4	176.6	191	69.9	125	6256.61	2987.83	2615.92	2807.08
[R].LASYLDKVR.[A]	1xBiotin [K7]	7	21	P08727; P13645	P08727 [91-99]; P13645 [157-165]	P08727 1xBiotin [K97]; P13645 1xBiotin [K163]	Keratin, type I cytoskeletal 19 OS=Homo sapiens OX=9606 GN=KRT19 PE=1 SV=4 Keratin, type I cytoskeletal 10 OS=Homo sapiens OX=9606 GN=KRT10 PE=1 SV=6	1	1290.69	1.648	2.143	1.185	0.72	1.1	0.25	0.76712	0.0636755	0.975423	1	0.307996	1	78.4	69.2	80.1	129.1	148.3	94.9	100.4	68.3	77	68.1	91.6	13.8	79.1	78.7	70	189.1	96.3	127	168.2	145.9	126.2	93.3	120	86.9	20910.1	14225.3	16042.4	14171.6
[R].HSEQTLKTALISK.[N]	1xBiotin [K7]	2	6	Q86W34	Q86W34 [6-18]	Q86W34 1xBiotin [K12]	Archaemetzincin-2 OS=Homo sapiens OX=9606 GN=AMZ2 PE=2 SV=2	1	1681.89	1.672	2.132	2.62	0.74	1.09	1.39	0.607121	0.236437	0.458255	1	0.766124	1	72.3	57.3	62.8	120.8	122.1	164.6	89.1	47.9	76.4	68.8	60.5	38.5	66.4	85.2	32.7	92.1	127.7	175.5	94	201.6	129	47.2	173.9	193.4	3886.35	2089.81	3329.54	2999.28
[R].GADIKSVVFK.[G]	1xBiotin [K5]	5	3	Q6UXI9	Q6UXI9 [529-538]	Q6UXI9 1xBiotin [K533]	Nephronectin OS=Homo sapiens OX=9606 GN=NPNT PE=2 SV=3	1	1289.69	0.714	2.124	1.807	-0.49	1.09	0.85	0.713066	0.377049	0.259134	1	1	0.969031	104.9	63.1	79.4	74.9	134.1	143.6	168.8	102.1	70.5	50.9	93.3	61.5	93	51	77.4	114.3	73	41.7	141.6	94.6	130.6	105.2	190.7	139.8	6619.41	4004.56	2764.26	1996.53
[R].KPLENLGMTDMFR.[Q]	1xBiotin [K1]	2	6	P05121	P05121 [311-323]	P05121 1xBiotin [K311]	Plasminogen activator inhibitor 1 OS=Homo sapiens OX=9606 GN=SERPINE1 PE=1 SV=1	0	1777.84	1.591	2.111	1.734	0.67	1.08	0.79	0.651906	0.704258	0.999974	1	1	1	60.9	82	68.4	96.9	173.2	118.6	51	32.5	39.2	65.8	52.7	52.9	180.9	44.1	40	270.7	62.4	61.4	380.1	58.4	111.6	189.8	29.9	76.5	2822.23	1796.66	2168.88	3639.89
[R].WLKGGVVLK.[E]	1xBiotin [K3]	2	3	P35613	P35613 [171-179]	P35613 1xBiotin [K173]	Basigin OS=Homo sapiens OX=9606 GN=BSG PE=1 SV=2	1	1225.71	2.197	2.107	1.662	1.14	1.08	0.73	0.0393069	0.0150109	0.339838	0.220482	0.0949744	1	66.8	61.9	72.8	146.8	130.5	121.1	61.4	64.4	71.5	48.8	59.6	69.5	45.7	119.2	70.1	118.5	141.4	156.5	125.7	120.6	178	86.1	146.4	116.6	10032.9	10515	11674.5	7971.86
[R].YQKSTELLIR.[K]	1xBiotin [K3]	6	15	Q71DI3	Q71DI3 [55-64]	Q71DI3 1xBiotin [K57]	Histone H3.2 OS=Homo sapiens OX=9606 GN=H3C15 PE=1 SV=3	1	1476.79	1.689	2.107	2.405	0.76	1.07	1.27	0.739357	0.0397333	0.295539	1	0.214753	1	77.8	55.7	63.9	131.4	117.3	153.8	76.2	74.6	73.9	53.4	55.8	8.7	59.7	81.3	61.3	126	97.1	174.9	94.8	151.9	112.5	147.4	228.4	122.2	14156.1	13861.2	13740.5	9923.12
[K].DVNAAIATIKTK.[R]	1xBiotin [K]	8	9	P68363	P68363 [327-338]	P68363 1xBiotin [K]	Tubulin alpha-1B chain OS=Homo sapiens OX=9606 GN=TUBA1B PE=1 SV=1	1	1470.8	1.965	2.106	1.7	0.97	1.07	0.77	0.685034	0.875477	0.912027	1	1	1	47.2	81.6	76.6	92.8	171.7	130.1	27.2	37	83.9	301.4	63.9	26.5	60	69.7	54.5	169.9	68.2	72.7	108.5	192.3	134.5	63.9	164	101.9	2272.19	3089.08	7006.72	25174.8
[K].SKSPAYTLVWTR.[L]	1xBiotin [K2]	1	14	P98160	P98160 [1797-1808]	P98160 1xBiotin [K1798]	Basement membrane-specific heparan sulfate proteoglycan core protein OS=Homo sapiens OX=9606 GN=HSPG2 PE=1 SV=4	1	1634.84	1.493	2.101	1.458	0.58	1.07	0.54	0.306651	0.181143	0.984013	1	0.629756	1	74.7	64.4	87	111.6	135.3	126.9	58.6	74.1	66.9	109	49.2	57.7	155.7	60.4	77.9	99.4	163.2	99.9	114.6	121.2	165.3	81.5	113.6	131.9	11230.4	14212	12817.3	20902.5
[R].VKLLLQVQHASK.[Q]	1xBiotin [K2]	3	3	P12236	P12236 [32-43]	P12236 1xBiotin [K33]	ADP/ATP translocase 3 OS=Homo sapiens OX=9606 GN=SLC25A6 PE=1 SV=4	1	1589.92	0.568	2.092	1.499	-0.81	1.06	0.58	0.737543	0.239344	0.710898	1	0.773667	1	138.4	63.8	74.2	78.7	133.5	111.3	196.7	60.4	135.5	62.5	54.2	76.4	42.1	72.6	133.4	77	93	65.8	111.4	146.6	130.7	103.1	129.5	108.9	12200.9	3742.81	8404.98	3875.92
[K].LVSSTLFGNTKPR.[K]	1xBiotin [K11]	1	9	Q14512	Q14512 [150-162]	Q14512 1xBiotin [K160]	Fibroblast growth factor-binding protein 1 OS=Homo sapiens OX=9606 GN=FGFBP1 PE=1 SV=1	0	1645.87	1.293	2.087	2.185	0.37	1.06	1.13	0.999444	0.171314	0.205258	1	0.609878	0.815535	71	71.5	68	91.8	149.2	148.5	74.7	71	161.3	75.3	54.3	76.4	43.3	76.8	71.5	68.5	96.7	99	110.2	160.3	157.1	68.2	156.3	179.3	3930.62	3733.57	8483.13	3958.24
[K].SVADLLGSFEGKR.[R]	1xBiotin [K12]	2	5	Q76M96	Q76M96 [611-623]	Q76M96 1xBiotin [K622]	Coiled-coil domain-containing protein 80 OS=Homo sapiens OX=9606 GN=CCDC80 PE=1 SV=1	1	1604.81	0.946	2.084	1.817	-0.08	1.06	0.86	0.91266	0.806987	0.998855	1	1	1	100.5	67.3	69.9	95.1	140.2	127	73.6	67	30.5	44.8	49.8	37.4	179.8	38.6	46.6	382.8	44.9	63.4	256.3	42.1	93.4	229.6	34.8	84.6	3950.55	3598.02	1640.31	2406.91
[R].VKAAPYWLDEPK.[N]	1xBiotin [K2]	13	4	O94856	O94856 [333-344]	O94856 1xBiotin [K334]	Neurofascin OS=Homo sapiens OX=9606 GN=NFASC PE=1 SV=4	1	1642.83	1.758	2.075	1.153	0.81	1.05	0.21	0.309122	0.0947825	0.993288	1	0.415712	1	60.5	72.2	97.9	106.4	149.9	113	62.6	79.8	41.8	86.3	56.7	74.7	89.2	101.3	121.5	126.5	110	64.9	91.2	189.1	155	108	124.8	116.8	2169.96	2766.13	1448.25	2994.15
[R].LFTKVKPLLQVSR.[Q]	1xBiotin [K4]	2	2	P35579	P35579 [830-842]	P35579 1xBiotin [K833]	Myosin-9 OS=Homo sapiens OX=9606 GN=MYH9 PE=1 SV=4	1	1755.03	1.194	2.07	1.988	0.26	1.05	0.99	0.89826	0.712671	0.999981	1	1	1	82.6	68.4	69.9	98.6	141.5	139	95.6	35.6	83.9	69.4	99.4	57	189.8	71	54	100.4	100.2	99.8	174.9	89	143.7	141.3	40.5	154.6	3853.54	1433.65	3382.1	2799.87
[R].AQDDVSEWASKAK.[A]	1xBiotin [K11]	4	6	O00339	O00339 [771-783]	O00339 1xBiotin [K781]	Matrilin-2 OS=Homo sapiens OX=9606 GN=MATN2 PE=1 SV=4	1	1660.76	1.68	2.069	1.931	0.75	1.05	0.95	0.0596044	0.0323366	0.185905	0.315762	0.181384	0.756656	70.5	65.8	71.4	118.4	136.2	137.8	32.3	70.8	78.3	73.5	37.6	66.1	80	71.3	71.7	118.9	116.4	138.5	131.5	142	136.9	93	202.7	138.5	1656.01	3629.52	4010.68	3769.27
[-G].MQIFVKTLTGK.[T]	1xBiotin [K6]; 1xOxidation [M1]	4	4	P62979	P62979 [1-11]	P62979 1xBiotin [K6]	Ubiquitin-40S ribosomal protein S27a OS=Homo sapiens OX=9606 GN=RPS27A PE=1 SV=2	1	1507.8	1.362	2.059	2.808	0.45	1.04	1.49	0.999996	0.751239	0.203858	1	1	0.812748	96.9	61.4	48.1	132	126.5	135.1	123	62.1	103.7	65.7	58.6	70.1	51.5	37.6	56.9	141.1	35.1	184.5	50.5	135.3	214.8	108.1	144.5	156.9	7091.73	3580.91	5974.97	3786.55
[K].VLKQVHPDTGISSK.[A]	1xBiotin [K3]	16	19	Q16778; P58876	Q16778 [45-58]; P58876 [45-58]	Q16778 1xBiotin [K47]; P58876 1xBiotin [K47]	Histone H2B type 2-E OS=Homo sapiens OX=9606 GN=H2BC21 PE=1 SV=3 Histone H2B type 1-D OS=Homo sapiens OX=9606 GN=H2BC5 PE=1 SV=2	1	1734.92	1.819	2.057	1.935	0.86	1.04	0.95	0.614947	0.118771	0.448421	1	0.477587	1	74.6	65	65	135.7	133.8	125.8	53.8	78.4	138.4	45.3	68.4	72.5	68.4	63.2	71.7	95.8	142.7	151.2	85.2	140.6	176.1	73.8	142.2	132.2	28735.7	41884.8	73916.2	24214.3
[R].KTLLSNLEEAK.[K]	1xBiotin [K1]	5	2	P10909	P10909 [68-78]	P10909 1xBiotin [K68]	Clusterin OS=Homo sapiens OX=9606 GN=CLU PE=1 SV=1	1	1471.78	1.37	2.052	2.137	0.45	1.04	1.1	0.527188	0.0508171	0.0207256	1	0.258934	0.1299	80.1	53.4	78.7	109.8	109.6	168.3	80.5	95.9	43.2	55.5	39.6	53.7	51.3	79.1	96.5	76.2	110.3	136.3	134.7	110.1	84.1	227.2	169.1	156.6	3007.63	3581.07	1614.46	2074.5
[K].KDVDEAYMNK.[V]	1xBiotin [K1]	2	14	P05787	P05787 [198-207]	P05787 1xBiotin [K198]	Keratin, type II cytoskeletal 8 OS=Homo sapiens OX=9606 GN=KRT8 PE=1 SV=7	1	1438.63	1.595	2.046	2.03	0.67	1.03	1.02	0.354003	0.333791	0.275671	1	0.97473	1	80.1	62.8	66.3	127.8	128.5	134.6	31.1	93.1	80.5	60	103.6	63.1	42.6	81.4	66.6	94.6	128.4	130.4	205	105.1	129.1	81.7	135.3	168.4	3722.15	11142	9633.6	7186.76
[R].VGLKAPGIIPR.[I]	1xBiotin [K4]	3	3	P25705	P25705 [172-182]	P25705 1xBiotin [K175]	ATP synthase subunit alpha, mitochondrial OS=Homo sapiens OX=9606 GN=ATP5F1A PE=1 SV=1	1	1346.8	1.63	2.033	2.787	0.7	1.02	1.48	0.214157	0.194251	0.0158192	0.847528	0.666646	0.104548	73.1	66.7	54.2	119.2	135.6	151.2	66.8	74.4	64.9	61.4	56.8	60.9	50.5	49.5	34.3	108.9	86.3	271.3	172.1	123.8	83.3	92	204.8	138.1	3411	3800.75	3313.55	3138.09
[K].STGGKAPR.[K]	1xBiotin [K5]	6	1	Q71DI3	Q71DI3 [11-18]	Q71DI3 1xBiotin [K15]	Histone H3.2 OS=Homo sapiens OX=9606 GN=H3C15 PE=1 SV=3	1	999.504	5.254	2.023	1.855	2.39	1.02	0.89	0.0023424	0.242784	0.0648237	0.0189521	0.774103	0.33157	29.8	65.5	75.5	156.6	132.5	140.1	28.1	27	56.3	61.8	100.2	48	36.9	71.8	71.3	147.8	108.3	212.1	110.2	125	157.4	105.7	199.9	132.2	1526.12	1463.56	3055.83	3351.9
[K].ASLELKSSIIGK.[K]	1xBiotin [K6]	2	4	Q8N6H7	Q8N6H7 [204-215]	Q8N6H7 1xBiotin [K209]	ADP-ribosylation factor GTPase-activating protein 2 OS=Homo sapiens OX=9606 GN=ARFGAP2 PE=1 SV=1	1	1471.82	1.316	2.022	1.336	0.4	1.02	0.42	0.522653	0.0797609	0.244018	1	0.365914	0.930754	75.9	73.9	86	99.9	149.5	114.9	77.2	78.7	66.2	75.2	92	50.9	87.5	98.9	66.3	91.4	101.6	119	152.1	162.3	83.7	116.9	163.9	116.3	2784.02	2836.3	2386.72	2712.46
[R].AKVTLNGVPAQPLGPR.[A]	1xBiotin [K2]	1	52	P05362	P05362 [338-353]	P05362 1xBiotin [K339]	Intercellular adhesion molecule 1 OS=Homo sapiens OX=9606 GN=ICAM1 PE=1 SV=2	1	1844.02	1.369	2.016	0.972	0.45	1.01	-0.04	0.561474	0.0062826	0.996092	1	0.0448517	1	80.1	75	93.3	109.7	151.3	90.6	81.4	75.2	91.2	76.7	69.2	76.2	94.7	84	112	111.4	83.9	125.3	153.7	189.8	104	76.3	92.1	102.9	58426.4	53975.8	65489.3	55059.1
[K].GTMKMLVSGAGDIK.[L]	1xBiotin [K4]	5	1	P40227	P40227 [42-55]	P40227 1xBiotin [K45]	T-complex protein 1 subunit zeta OS=Homo sapiens OX=9606 GN=CCT6A PE=1 SV=3	1	1633.81	0.5	2.016	0.332	-1	1.01	-1.59	0.574552	0.990127	0.0652945	1	1	0.332703	98.8	42.7	242.5	49.4	86.1	80.5	76.1	90.7	142.4	123.7	39.2	38	311.1	141.1	222.5	91.1	45.4	43.6	79	47.9	88.3	73.8	58.1	87.9	3320.63	3956.17	6213	5396.52
[K].QLATKAAR.[K]	1xBiotin [K5]	5	12	Q71DI3	Q71DI3 [20-27]	Q71DI3 1xBiotin [K24]	Histone H3.2 OS=Homo sapiens OX=9606 GN=H3C15 PE=1 SV=3	1	1084.59	1.084	2.006	1.75	0.12	1	0.81	0.999965	0.259194	0.232875	1	0.803331	0.900043	97.5	67.6	70.4	105.7	135.6	123.2	77.9	137.8	94.2	62.1	65.3	114.3	61	68	76.7	102.1	95.9	115.5	108.5	131.1	137.4	119	74.1	159.1	10737.9	18992.5	12980.1	8553.56
[R].LIKDIR.[FI]	1xBiotin [K3]	2	34	Q2M389	Q2M389 [866-871]	Q2M389 1xBiotin [K868]	WASH complex subunit 4 OS=Homo sapiens OX=9606 GN=WASHC4 PE=1 SV=2	1	983.571	1.174	2.003	1.964	0.23	1	0.97	0.732888	0.043405	0.0293833	1	0.228133	0.17357	81.5	62.2	79.7	95.7	124.5	156.5	87.5	73.1	87.5	53.3	80.7	66.7	49.9	85.6	86	102.7	97.2	120.1	101.5	133.7	139.8	96.1	170.5	168	464217	388175	464352	282706
[K].NLCYANTINWKK.[L]	1xBiotin [K]; 1xCarbamidomethyl [C3]	3	6	P00533	P00533 [468-479]	P00533 1xBiotin [K]	Epidermal growth factor receptor OS=Homo sapiens OX=9606 GN=EGFR PE=1 SV=2	1	1750.84	1.347	1.979	2.806	0.43	0.99	1.49	1	0.696424	0.0816263	1	1	0.39589	97.4	47.6	60.3	131.2	94.3	169.1	70.9	123.4	103.2	50.5	48.7	89.2	56.8	63.9	67.2	163.3	139	37.3	99.9	81.3	107.3	180.8	138.1	179.2	2758.98	4799.98	4016.02	1963.84
[R].VVKLDVLCTK.[C]	1xBiotin [K3]; 1xCarbamidomethyl [C8]	2	2	P21589	P21589 [469-478]	P21589 1xBiotin [K471]	5'-nucleotidase OS=Homo sapiens OX=9606 GN=NT5E PE=1 SV=1	1	1400.76	2.241	1.978	1.61	1.16	0.98	0.69	0.867802	0.984834	0.965592	1	1	1	68.4	55.9	81.1	153.4	110.5	130.6	166.1	54.6	25.5	35.4	238.9	44.6	139.9	64.7	28.3	124.5	122.4	103.8	86.1	88.2	151.7	58.3	162.8	104.3	10033.8	3298.97	1541.13	2139.02
[K].AVKSSEHINEGETAMLVCK.[S]	1xBiotin [K3]; 1xCarbamidomethyl [C18]	4	18	P35613	P35613 [225-243]	P35613 1xBiotin [K227]	Basigin OS=Homo sapiens OX=9606 GN=BSG PE=1 SV=2	1	2329.1	1.32	1.977	0.65	0.4	0.98	-0.62	0.999556	0.613874	0.999728	1	1	1	77.9	74.3	120	102.8	146.9	78.1	72.4	66.5	100.7	139.4	69.1	60.2	83.8	115.8	111.6	95.6	66.8	98.1	136.7	157.8	103.6	72.6	63.9	185.2	27832.6	25564	38680.3	53570.7
[R].HNGTGGKSIYGEK.[F]	1xBiotin [K7]	2	18	P62937	P62937 [70-82]	P62937 1xBiotin [K76]	Peptidyl-prolyl cis-trans isomerase A OS=Homo sapiens OX=9606 GN=PPIA PE=1 SV=2	1	1573.74	1.04	1.975	0.707	0.06	0.98	-0.5	1	0.149156	0.816989	1	0.551587	1	103.6	59.3	124.3	107.7	117.2	87.9	78.4	139.5	98.6	32.7	56.5	91.8	184.5	82	118.3	102.5	91.4	119.4	109.2	111.5	112	70.4	117.5	83.6	123901	220303	155730	51698.8
[R].IKENLAVGSK.[I]	1xBiotin [K2]	2	10	Q14574	Q14574 [480-489]	Q14574 1xBiotin [K481]	Desmocollin-3 OS=Homo sapiens OX=9606 GN=DSC3 PE=1 SV=3	1	1284.7	3.586	1.973	2.317	1.84	0.98	1.21	0.000165065	0.134195	0.049526	0.00186747	0.507737	0.267681	46.4	64.9	58.6	166.2	128	135.9	20.6	51.5	42.3	70.5	59.2	55.7	53.5	48.4	62.6	151.8	143.6	309.6	116.9	147.4	97.4	103.7	141.1	124.1	3853.03	9631.08	7919.33	13189.3
[R].TFVTEFKLK.[R]	1xBiotin [K7]	1	2	Q9ULI3	Q9ULI3 [1067-1075]	Q9ULI3 1xBiotin [K1073]	Protein HEG homolog 1 OS=Homo sapiens OX=9606 GN=HEG1 PE=1 SV=3	1	1338.71	1.032	1.973	1.578	0.05	0.98	0.66	0.997003	0.999782	0.868658	1	1	1	93.3	77.5	69.8	96.3	152.9	110.1	103.2	54.5	146.5	103.6	85.7	69.2	113.4	38.9	77.2	34.1	106.5	116.3	179.1	29.9	169.1	88.5	121.8	162.6	7140.9	3769.64	10136	7172.32
[R].KASDVHEVR.[K]	1xBiotin [K1]	3	13	P14618	P14618 [247-255]	P14618 1xBiotin [K247]	Pyruvate kinase PKM OS=Homo sapiens OX=9606 GN=PKM PE=1 SV=4	1	1266.63	1.04	1.967	2.089	0.06	0.98	1.06	0.999994	0.081073	0.152906	1	0.370659	0.648032	91.5	64.9	71.5	95.1	127.6	149.5	87.6	105	92.7	48.1	71.7	65.7	58.6	72.5	93.5	77.9	96.4	123.6	84.9	165.2	129.3	83.4	192.3	151.5	11315.6	13559.9	11972.5	6209.75
[K].KGVNLPGAAVDLPAVSEK.[D]	1xBiotin [K1]	3	9	P14618	P14618 [207-224]	P14618 1xBiotin [K207]	Pyruvate kinase PKM OS=Homo sapiens OX=9606 GN=PKM PE=1 SV=4	1	1991.06	2.137	1.963	1.124	1.1	0.97	0.17	0.716621	0.835128	0.999473	1	1	1	62.4	60	106.6	133.3	117.9	119.8	57.7	72	26.3	148.2	55.5	52.5	198.4	55.5	98.5	129.9	123.3	40.7	97.9	109	180.4	110.8	104.6	139	3297.35	4117.22	1502.59	8472.89
[R].IVDGKVVSETNDTK.[V]	1xBiotin [K5]	1	7	P05783	P05783 [413-426]	P05783 1xBiotin [K417]	Keratin, type I cytoskeletal 18 OS=Homo sapiens OX=9606 GN=KRT18 PE=1 SV=2	1	1730.86	2.016	1.963	1.572	1.01	0.97	0.65	0.340057	0.698515	0.516569	1	1	1	68.2	66.9	76.2	137.6	131.3	119.8	156.9	28.6	63.6	62.4	119.3	52.6	71.1	74.5	39.9	114.1	184.6	128.3	129	115.6	122.5	94.3	131.1	111.7	8742.09	1593.81	3546.94	3478.53
[K].TDGKGDFVSLALR.[D]	1xBiotin [K4]	7	2	O00468	O00468 [1684-1696]	O00468 1xBiotin [K1687]	Agrin OS=Homo sapiens OX=9606 GN=AGRN PE=1 SV=6	1	1604.81	0.934	1.962	1.213	-0.1	0.97	0.28	0.999915	0.243493	1	1	0.774103	1	85.7	78.4	91.3	80	153.8	110.7	83	76	90.3	85.4	75.9	53.8	154.5	88.4	77.4	123.4	70.9	77.5	162.2	97.5	149	169.8	57.8	107.2	3174.79	2906.16	3453.48	3266.45
[R].SGEPQTFTLKFK.[R]	1xBiotin [K10]	5	5	P05556	P05556 [125-136]	P05556 1xBiotin [K134]	Integrin beta-1 OS=Homo sapiens OX=9606 GN=ITGB1 PE=1 SV=2	1	1608.81	2.177	1.958	1.071	1.12	0.97	0.1	0.226486	0.910943	0.972399	0.881511	1	1	62.8	61.4	105.6	136.7	120.3	113.1	71.3	58.6	57.9	111.6	51.1	57.3	109.6	98.4	97.9	129.7	119.1	127.5	44.5	155.6	112.2	98.7	105.4	193.7	2385.68	1960.86	1937.82	3736.24
[R].GELALKDAR.[AN]	1xBiotin [K6]	3	11	P08729; P13647	P08729 [343-351]; P13647 [421-429]	P08729 1xBiotin [K348]; P13647 1xBiotin [K426]	Keratin, type II cytoskeletal 7 OS=Homo sapiens OX=9606 GN=KRT7 PE=1 SV=5 Keratin, type II cytoskeletal 5 OS=Homo sapiens OX=9606 GN=KRT5 PE=1 SV=3	1	1198.62	2.373	1.952	3.427	1.25	0.97	1.78	0.135511	0.47628	0.0449231	0.599032	1	0.244785	59.7	58.7	50.9	141.7	114.6	174.5	54.8	52.7	72.9	53.9	98.2	42	34.8	46.8	62.2	275.1	85	130.1	92.7	136.7	105.2	81.9	214.6	160.3	13252.3	12732.2	17625.4	13026.4
[K].FGMVLLKK.[T]	1xBiotin [K]	2	2	Q76M96	Q76M96 [233-240]	Q76M96 1xBiotin [K]	Coiled-coil domain-containing protein 80 OS=Homo sapiens OX=9606 GN=CCDC80 PE=1 SV=1	1	1161.65	1.056	1.945	1.722	0.08	0.96	0.78	0.956757	0.156702	0.165589	1	0.570236	0.688666	85	69.1	81.5	89.8	134.4	140.3	41.5	86.9	104.4	51.3	70.6	86.2	116.3	83.3	41.9	97.1	91.8	80.5	144.9	124.7	137.4	130.7	143.4	167.1	2002.25	4192.39	5037.58	2476.65
[R].LDYLSSLKVK.[G]	1xBiotin [K8]	4	11	P08195	P08195 [248-257]	P08195 1xBiotin [K255]	4F2 cell-surface antigen heavy chain OS=Homo sapiens OX=9606 GN=SLC3A2 PE=1 SV=3	1	1391.76	1.292	1.945	2.422	0.37	0.96	1.28	0.891916	0.936641	0.226306	1	1	0.878252	81	60.9	68.7	104.6	118.4	166.5	80.8	60.3	83.7	174.1	44.1	60.8	79.9	45.4	68.6	120.7	92.9	104.4	128.7	76.5	118.2	216.7	78	166.2	14877.5	11105.3	15403	32044.2
[K].WSLLQQQKTAR.[S]	1xBiotin [K8]	2	33	P05787	P05787 [123-133]	P05787 1xBiotin [K130]	Keratin, type II cytoskeletal 8 OS=Homo sapiens OX=9606 GN=KRT8 PE=1 SV=7	1	1584.83	1.158	1.939	1.656	0.21	0.96	0.73	0.778587	0.0466949	0.156044	1	0.241007	0.659237	95.7	63	78.4	110.8	122.3	129.8	106.4	89.3	87.4	69.6	58.8	57.6	69.8	73.1	90.6	202.7	103.4	79.3	116.9	114.1	108.1	116.7	134.9	121.1	71412.5	59907	58642.2	46731.7
[K].VKLEAEIATYR.[R]	1xBiotin [K2]	1	13	P05783	P05783 [371-381]	P05783 1xBiotin [K372]	Keratin, type I cytoskeletal 18 OS=Homo sapiens OX=9606 GN=KRT18 PE=1 SV=2	1	1518.8	1.102	1.937	1.772	0.14	0.95	0.83	0.992598	0.124621	0.380023	1	0.48901	1	110.8	56.6	72.5	122.1	109.6	128.4	155.3	54.3	109.1	68.5	47.3	55.7	98.8	59.2	71.4	122.3	120.2	95.1	100.3	107.9	141.1	126.4	85.6	181.6	79004	27603.7	55482.7	34827.1
[K].GGKTEQDGYQKPTNK.[H]	1xBiotin [K3]	2	7	Q76M96	Q76M96 [588-602]	Q76M96 1xBiotin [K590]	Coiled-coil domain-containing protein 80 OS=Homo sapiens OX=9606 GN=CCDC80 PE=1 SV=1	1	1876.89	1.366	1.936	1.922	0.45	0.95	0.94	0.663274	0.247355	0.482065	1	0.782508	1	90.3	62.9	69	123.3	121.8	132.6	39.7	83.6	81.7	56.9	58.6	48.9	62.5	137	47.7	195.7	59.2	111.6	110.2	167.1	100	105.2	214.5	120	2875.48	6050.31	5915.53	4123.11
[R].WSNAKMEIATK.[D]	1xBiotin [K5]	1	13	Q15181	Q15181 [53-63]	Q15181 1xBiotin [K57]	Inorganic pyrophosphatase OS=Homo sapiens OX=9606 GN=PPA1 PE=1 SV=2	1	1504.73	2.08	1.932	1.66	1.06	0.95	0.73	0.0613869	0.195401	0.64142	0.320123	0.667162	1	55.8	71.4	82.3	116.1	137.9	136.6	83.1	56.9	22.5	72.7	88.8	34	92.4	77.6	83.9	155.1	110.7	118.2	105.8	140.5	145.4	106.3	167.2	139.2	7831.18	5358.51	2120.38	6851.37
[R].KPIAGGGGFSDKDLEDIVGGGEYKPDK.[G]	1xBiotin [K1]	4	2	Q8TCZ2	Q8TCZ2 [137-163]	Q8TCZ2 1xBiotin [K137]	CD99 antigen-like protein 2 OS=Homo sapiens OX=9606 GN=CD99L2 PE=1 SV=1	1	2975.45	0.854	1.929	0.887	-0.23	0.95	-0.17	0.999229	0.841433	0.977713	1	1	1	108.9	70.3	101.8	93	135.7	90.3	81.9	107.8	77.1	52.9	75	50.1	99.4	38.2	76.6	256.2	63.2	70	166.2	102	68.1	307.3	40.1	67.9	3029.78	3986.12	2852.47	1956.55
[R].AETKWSDPITLHQGK.[T]	1xBiotin [K4]	1	17	Q9BT76-3	Q9BT76-3 [168-182]	Q9BT76-3 1xBiotin [K171]	Isoform 3 of Uroplakin-3b OS=Homo sapiens OX=9606 GN=UPK3B	1	1936.96	1.12	1.924	1.04	0.16	0.94	0.06	0.842976	0.966041	0.837057	1	1	1	92.8	64.4	105.3	104	123.9	109.5	175.1	86.1	86.6	129.3	60.1	54	112.8	98.2	9.5	126	8.3	97	173.8	114.9	115.6	170.6	80.1	102.2	53407.1	26271.9	26412.8	39421.7
[K].TVDGPSGKLWR.[D]	1xBiotin [K8]	2	32	P04406	P04406 [187-197]	P04406 1xBiotin [K194]	Glyceraldehyde-3-phosphate dehydrogenase OS=Homo sapiens OX=9606 GN=GAPDH PE=1 SV=3	1	1441.73	1.114	1.922	1.406	0.16	0.94	0.49	0.993069	0.994119	0.843354	1	1	1	87.6	78.1	77.6	97.6	150	109.1	64.1	75.2	67.6	53.3	60.2	340.7	53.2	68.7	59.9	75.3	73.2	112.1	197.8	115.8	88.7	78.9	131	84.2	30528.9	35815.6	32203.2	25395.4
[-G].MQIFVKTLTGK.[T]	1xBiotin [K]	4	25	P62979	P62979 [1-11]	P62979 1xBiotin [K]	Ubiquitin-40S ribosomal protein S27a OS=Homo sapiens OX=9606 GN=RPS27A PE=1 SV=2	1	1491.81	1.126	1.92	1.794	0.17	0.94	0.84	0.999999	0.0108689	0.0604189	1	0.0721888	0.311426	89.7	73.3	69.9	101	140.7	125.4	127.8	74.3	90	73.5	49.2	90.4	82	70.1	69.7	101.4	103.8	84.7	153.5	115.7	141.2	138.3	108.6	125.8	27901.9	16216.6	19655.3	16050.7
[R].IFSFDGKDVLR.[H]	1xBiotin [K7]	3	1	P39060	P39060 [1671-1681]	P39060 1xBiotin [K1677]	Collagen alpha-1(XVIII) chain OS=Homo sapiens OX=9606 GN=COL18A1 PE=1 SV=5	1	1522.77	1.168	1.92	0.462	0.22	0.94	-1.11	0.925445	0.59863	0.79704	1	1	1	63.1	88.4	140.3	73.7	169.8	64.8	47.7	55.9	77.2	78.4	124.2	77.6	144.6	124.4	78.5	166.7	65.3	47.5	188.6	129.1	150.5	132.1	57.5	54.4	1561.03	1831.42	2527.17	2567.69
[K].VFVRPTNSCMKTIGVHDR.[V]	1xBiotin [K11]; 1xCarbamidomethyl [C9]; 1xOxidation [M10]	1	4	P52803	P52803 [156-173]	P52803 1xBiotin [K166]	Ephrin-A5 OS=Homo sapiens OX=9606 GN=EFNA5 PE=1 SV=1	1	2359.15	6.438	1.919	3.155	2.69	0.94	1.66	0.0183582	0.28595	0.203948	0.113992	0.86563	0.812748	41.6	41.9	40.6	267.5	80.5	128	28.1	41	37.8	38.1	39.1	37.6	16.5	43.5	36.9	121.6	243.3	365	73.2	70.9	248.7	35.2	207.2	116.4	2689.42	3925.32	3622.27	3654.28
[R].GQKVLDSGAPIK.[I]	1xBiotin [K3]	1	2	P06576	P06576 [122-133]	P06576 1xBiotin [K124]	ATP synthase subunit beta, mitochondrial OS=Homo sapiens OX=9606 GN=ATP5F1B PE=1 SV=3	1	1438.77	1.148	1.914	1.51	0.2	0.94	0.59	0.999879	0.133686	0.775825	1	0.507737	1	99.2	64	79.8	113.9	122.5	120.5	66	169.5	104.4	28.5	67.4	73.3	97.7	84	65.3	128.2	92.4	119.9	76.4	144.1	128.9	98.8	128.1	126.9	3701.83	9502.5	5854.87	1599.56
[K].FASFIDKVR.[F]	1xBiotin [K7]	21	33	P08729; P35908; P04259; P05787; P13647	P08729 [102-110]; P35908 [189-197]; P04259 [174-182]; P05787 [102-110]; P13647 [179-187]	P08729 1xBiotin [K108]; P35908 1xBiotin [K195]; P04259 1xBiotin [K180]; P05787 1xBiotin [K108]; P13647 1xBiotin [K185]	Keratin, type II cytoskeletal 7 OS=Homo sapiens OX=9606 GN=KRT7 PE=1 SV=5 Keratin, type II cytoskeletal 2 epidermal OS=Homo sapiens OX=9606 GN=KRT2 PE=1 SV=2 Keratin, type II cytoskeletal 6B OS=Homo sapiens OX=9606 GN=KRT6B PE=1 SV=5 Keratin, type II cytoskeletal 8 OS=Homo sapiens OX=9606 GN=KRT8 PE=1 SV=7 Keratin, type II cytoskeletal 5 OS=Homo sapiens OX=9606 GN=KRT5 PE=1 SV=3	1	1308.68	1.976	1.913	2.188	0.98	0.94	1.13	0.0851097	0.0255841	0.0707376	0.42082	0.150462	0.352369	81.3	62.9	54.8	160.7	120.3	120	80.1	59.6	109.2	61.9	54.9	67.2	53	54	89.3	158.3	107.8	173.5	114.7	118.5	144	89.9	118.2	145.8	38380.4	28556	52301.4	29664.7
[K].EAAGKSSGPTSLFAVTVAPPGAR.[Q]	1xBiotin [K5]	2	8	Q00839	Q00839 [182-204]	Q00839 1xBiotin [K186]	Heterogeneous nuclear ribonucleoprotein U OS=Homo sapiens OX=9606 GN=HNRNPU PE=1 SV=6	1	2397.22	1.084	1.912	1.019	0.12	0.94	0.03	1	0.624901	0.998892	1	1	1	85.7	64.1	116.2	92.9	122.6	118.5	81.9	60.4	73	184.1	11.6	54.6	110.6	82.7	99	79.1	97.2	46.6	87	104.4	187.9	100.9	59.8	279.3	11125.7	8205.56	9914.75	24999.2
[-].MTHFNKGPSYGLSAEVK.[N]	1xBiotin [K6]; 1xMet-loss+Acetyl [N-Term]	2	4	Q15417	Q15417 [1-17]	Q15417 1xBiotin [K6]; 1xMet-loss+Acetyl [N-Term]	Calponin-3 OS=Homo sapiens OX=9606 GN=CNN3 PE=1 SV=1	1	2002.97	2.052	1.891	0.969	1.04	0.92	-0.04	0.497173	0.923608	0.999312	1	1	1	67.8	69.8	97.1	139.1	132	94.1	105.6	62.3	49.4	64.1	123.2	58.5	93.9	52.3	89.2	127.8	165.7	121.3	251	45.3	121.3	86.5	60.7	122.1	3297.55	1944.63	1544.61	2003.04
[R].VTGTNKGISPVPINLR.[V]	1xBiotin [K6]	9	10	P50570	P50570 [108-123]	P50570 1xBiotin [K113]	Dynamin-2 OS=Homo sapiens OX=9606 GN=DNM2 PE=1 SV=2	1	1892.04	0.5	1.887	1.18	-1	0.92	0.24	0.651342	0.923798	0.916498	1	1	1	120.3	70.5	99.1	60.1	133	116.9	147.2	93.1	108.7	115.6	51.4	63.7	118.5	89.6	71.7	142.8	54.3	43.2	120.2	65.5	121.5	187.9	105.7	99.2	30122.5	19036.4	22246.8	23646.1
[K].HFTQSPKK.[S]	1xBiotin [K7]	2	5	Q76M96	Q76M96 [603-610]	Q76M96 1xBiotin [K609]	Coiled-coil domain-containing protein 80 OS=Homo sapiens OX=9606 GN=CCDC80 PE=1 SV=1	1	1198.6	2.86	1.88	1.335	1.52	0.91	0.42	0.542639	0.856506	0.920415	1	1	1	38.7	77.7	97.1	110.7	146.2	129.6	32.9	140.9	20.6	46	156.7	66	82.5	75.8	85	77.6	94	127.1	124.2	156.3	110.3	81.2	212.7	110.1	2659.94	11396.1	1663.46	3723.39
[K].NVKLTVSNVLK.[E]	1xBiotin [K3]	1	15	P02786	P02786 [372-382]	P02786 1xBiotin [K374]	Transferrin receptor protein 1 OS=Homo sapiens OX=9606 GN=TFRC PE=1 SV=2	1	1440.82	0.913	1.872	1.215	-0.13	0.9	0.28	0.999909	0.00652547	0.987288	1	0.0460926	1	93.4	74.6	93.6	85.3	139.6	113.7	100	71.4	91.2	81.8	50.4	72.9	80.5	91.4	116.1	94.3	73.7	83.3	136.4	214.2	119.2	83.3	111.1	128.8	22101.1	15776.4	20158.2	18067.1
[K].GKGGEIQPVSVK.[V]	1xBiotin [K2]	1	10	P61604	P61604 [55-66]	P61604 1xBiotin [K56]	10 kDa heat shock protein, mitochondrial OS=Homo sapiens OX=9606 GN=HSPE1 PE=1 SV=2	1	1424.76	1.59	1.871	1.506	0.67	0.9	0.59	0.382849	0.879976	0.911673	1	1	1	74.7	72	79.8	118.7	134.6	120.2	13.1	75.7	143.1	73	84.6	66.4	48.8	93.4	80.9	110.4	120.4	170.3	89.5	147.1	136.5	82.4	121.8	142.7	2524.26	14598.2	27581.6	14065.8
[R].GNPIKVSR.[V]	1xBiotin [K5]	1	5	P00488	P00488 [254-261]	P00488 1xBiotin [K258]	Coagulation factor XIII A chain OS=Homo sapiens OX=9606 GN=F13A1 PE=1 SV=4	1	1096.59	1.213	1.862	1.1	0.28	0.9	0.14	0.936191	0.105492	0.998927	1	0.44851	1	87.3	71.5	96.2	105.9	133.2	105.9	103.5	83.1	67.3	16.2	68.1	79	91.6	88.9	163.6	86.6	100.8	176.3	108.9	143.3	126.8	73.3	100.8	122	15250.6	12245.7	9915.47	2394.34
[R].AQLLLKATPEDNGR.[S]	1xBiotin [K6]	1	17	P05362	P05362 [354-367]	P05362 1xBiotin [K359]	Intercellular adhesion molecule 1 OS=Homo sapiens OX=9606 GN=ICAM1 PE=1 SV=2	1	1751.91	7.099	1.855	1.24	2.83	0.89	0.31	2.92856e-06	0.107093	0.578681	7.41396e-05	0.450232	1	16.7	92.5	89.4	118.8	171.6	110.9	31.9	15.8	16.8	87.1	114	92.7	69.3	101.6	89.6	102.8	135.8	119	135.6	172	173.3	111.1	128.5	103.1	3487.18	1729.53	1834.08	9533.45
[K].LKGIIIMGEDDDSHPSEMR.[L]	1xBiotin [K2]; 1xOxidation [M18]	2	1	Q9GZP4	Q9GZP4 [88-106]	Q9GZP4 1xBiotin [K89]	PITH domain-containing protein 1 OS=Homo sapiens OX=9606 GN=PITHD1 PE=1 SV=1	1	2385.09	0.583	1.851	0.615	-0.78	0.89	-0.7	0.757809	0.999985	0.919903	1	1	1	163.2	46.6	129.2	95.2	86.3	79.5	309.2	76.6	133.1	223	33.9	38	164.9	75.2	105.3	70.9	77.6	89.2	70.4	43.1	76.7	88.4	59.7	64.8	13802.5	3417.85	5940.92	9954.52
[R].EGNQDKFSYLPIQK.[G]	1xBiotin [K6]	8	3	P23229	P23229 [685-698]	P23229 1xBiotin [K690]	Integrin alpha-6 OS=Homo sapiens OX=9606 GN=ITGA6 PE=1 SV=5	1	1892.92	1.606	1.848	2.015	0.68	0.89	1.01	0.786316	0.39758	0.621595	1	1	1	70.1	85.5	57.7	112.6	158	116.2	46	72.7	137.7	42.6	92.7	88.7	35.2	59.9	110.4	107.5	116.8	135.5	177.3	91.4	164	122.2	78.7	120.6	1930.3	3051.49	5779.87	1788.47
[R].NFLKEDAMKTK.[T]	1xBiotin [K9]	1	3	Q29983	Q29983 [167-177]	Q29983 1xBiotin [K175]	MHC class I polypeptide-related sequence A OS=Homo sapiens OX=9606 GN=MICA PE=1 SV=1	2	1550.77	4.871	1.846	1.281	2.28	0.88	0.36	0.00591826	0.366006	0.918207	0.0422507	1	1	53.7	40.2	74.6	261.6	74.2	95.6	78.2	39.4	50.5	37.8	33.4	72.7	78.2	61.1	70.2	117.5	364.8	245.9	68.4	69.8	125.7	73.4	89.9	123	4082.97	2058.7	2635.36	1973.4
[K].LFDSTTLEHQKTFR.[T]	1xBiotin [K11]	1	7	Q13347	Q13347 [214-227]	Q13347 1xBiotin [K224]	Eukaryotic translation initiation factor 3 subunit I OS=Homo sapiens OX=9606 GN=EIF3I PE=1 SV=1	1	1948.96	0.857	1.838	0.783	-0.22	0.88	-0.35	0.863706	0.6229	0.990136	1	1	1	101.4	58.8	137.3	87	108.1	107.5	95.1	108.7	22.4	110.4	55.1	40.2	137.8	128.8	108.5	141.3	79.4	81.5	183.6	91.8	101.3	100.8	61.1	152.3	9416.61	10760.3	2215.01	10931.3
[R].KDAEAWFTSR.[T]	1xBiotin [K1]	1	22	P08727	P08727 [265-274]	P08727 1xBiotin [K265]	Keratin, type I cytoskeletal 19 OS=Homo sapiens OX=9606 GN=KRT19 PE=1 SV=4	1	1436.66	1.498	1.836	2.809	0.58	0.88	1.49	0.147591	0.089111	0.00725113	0.625507	0.396544	0.0537792	75.9	69.3	56.1	113.7	127.3	157.7	63.9	73.4	73.5	67.1	54.9	76	106.6	54.3	35.9	155.5	107.9	110	123.2	128.4	115.5	138.1	152.5	163.4	10076.1	11576.1	11585.8	10578.4
[R].DIASPKFSMPSPVR.[T]	1xBiotin [K6]	3	7	Q9NQ79	Q9NQ79 [333-346]	Q9NQ79 1xBiotin [K338]	Cartilage acidic protein 1 OS=Homo sapiens OX=9606 GN=CRTAC1 PE=1 SV=2	1	1757.87	1.254	1.833	1.267	0.33	0.87	0.34	0.73919	0.0581759	0.0600152	1	0.287647	0.310544	80.2	79.3	85.8	100.5	145.4	108.7	78.2	79.6	78.8	96.3	67.3	78	84.3	91.8	43.7	109.9	98.8	92.9	151.2	129.6	142.9	105.6	106.8	164.2	3397.73	3458.69	3419.9	4182.67
[K].TKDEPQR.[E]	1xBiotin [K2]	1	15	P21926	P21926 [134-140]	P21926 1xBiotin [K135]	CD9 antigen OS=Homo sapiens OX=9606 GN=CD9 PE=1 SV=4	1	1099.52	1.732	1.829	1.237	0.79	0.87	0.31	0.273848	0.344274	0.971448	0.996151	0.995475	1	69.3	85.3	75.7	120	156	93.7	85.2	67.4	70.1	86.3	79.3	87.3	76.6	64.1	87.7	78.6	121.4	197.1	182.4	86.4	157.8	70.4	107.1	94.8	35874.2	28400.3	29515.5	36323.1
[R].IIGLKPEGVPR.[I]	1xBiotin [K5]	2	4	P54709	P54709 [178-188]	P54709 1xBiotin [K182]	Sodium/potassium-transporting ATPase subunit beta-3 OS=Homo sapiens OX=9606 GN=ATP1B3 PE=1 SV=1	0	1404.8	2.261	1.828	1.784	1.18	0.87	0.84	0.0217288	0.0786223	0.0614319	0.13008	0.363186	0.315429	59.1	71.4	73.7	133.7	130.5	131.5	59.4	49.6	88.9	90	71.7	59.6	74	45	89.3	126.7	139.7	134.2	127.6	131	134.4	93.1	153.9	132	2454.52	2051.97	3677.38	3721.62
[K].FMKIGVSPPAK.[Q]	1xBiotin [K3]; 1xOxidation [M2]	2	39	O95084	O95084 [260-270]	O95084 1xBiotin [K262]	Serine protease 23 OS=Homo sapiens OX=9606 GN=PRSS23 PE=1 SV=1	1	1416.74	1.085	1.821	1.347	0.12	0.86	0.43	0.902461	0.670553	0.42589	1	1	1	75.7	78.4	94.2	82.2	142.7	126.8	58.5	88.4	77	77.2	107.3	79.6	57.5	97	95.7	61.6	83.5	156.5	146.5	145.1	87.7	129.9	122.1	128.9	13738.8	20767.6	18087.2	18146.6
[K].IGQGYLIKDGK.[L]	1xBiotin [K8]	1	3	P39023	P39023 [287-297]	P39023 1xBiotin [K294]	60S ribosomal protein L3 OS=Homo sapiens OX=9606 GN=RPL3 PE=1 SV=2	1	1417.75	1.337	1.814	0.877	0.42	0.86	-0.19	0.962039	0.0926093	0.999995	1	0.408031	1	78.4	83.4	96.9	104.8	151.4	85	112.1	59.1	74.1	78.8	95.8	45.2	53	122.8	91.5	89.9	99	109.9	142.1	220.6	143	80.3	50.6	132	3788.99	1995.84	2503.16	2662.66
[K].AGAHLQGGAKR.[V]	1xBiotin [K10]	2	5	P04406	P04406 [108-118]	P04406 1xBiotin [K117]	Glyceraldehyde-3-phosphate dehydrogenase OS=Homo sapiens OX=9606 GN=GAPDH PE=1 SV=3	1	1291.67	1.1	1.814	1.915	0.14	0.86	0.94	0.987444	0.225493	0.375811	1	0.73901	1	97.5	67.5	70.5	107.2	122.3	135	92.1	69.9	150.2	63.7	84.7	62.5	63.5	66.6	84.3	80.9	101.3	178.5	140.5	104.4	115.6	85	128.7	127.6	12760.6	9682.63	20814.9	8832.18
[R].TANPSKTIDLGAAAHYTGDK.[A]	1xBiotin [K6]	3	6	Q14677	Q14677 [278-297]	Q14677 1xBiotin [K283]	Clathrin interactor 1 OS=Homo sapiens OX=9606 GN=CLINT1 PE=1 SV=1	1	2257.09	0.701	1.812	0.859	-0.51	0.86	-0.22	0.984682	0.129932	0.999996	1	0.49973	1	121.1	64.5	114.3	85	116.9	98.1	177.8	115.7	58	74.4	23.1	61.6	109.1	125.5	101.5	72.2	81.1	108.5	100.2	140.5	111.7	80.1	93.7	165.4	34533.3	22469.9	11259.7	14458
[K].NNQKSEPLIGR.[K]	1xBiotin [K4]	15	24	P02751	P02751 [2069-2079]	P02751 1xBiotin [K2072]	Fibronectin OS=Homo sapiens OX=9606 GN=FN1 PE=1 SV=5	1	1481.75	1.705	1.812	1.73	0.77	0.86	0.79	0.184156	0.344411	0.604159	0.749539	0.995475	1	79.2	68.2	71.1	135	123.6	122.9	69.1	72.9	78.6	50.7	101.8	62.8	59.2	65.5	99.2	87.6	124.3	244.5	108	127.7	113.8	81.7	139.3	113.2	25110.3	26488.3	28538.8	18430.4
[R].NGKVLHPLEGAVVIIFK.[K]	1xBiotin [K3]	2	3	Q13740	Q13740 [173-189]	Q13740 1xBiotin [K175]	CD166 antigen OS=Homo sapiens OX=9606 GN=ALCAM PE=1 SV=2	1	2060.17	1.103	1.801	1.016	0.14	0.85	0.02	0.91753	0.82295	1	1	1	1	92.5	70.1	103.8	102	126.2	105.5	60.1	72.7	51.8	45.6	55.4	39.3	127.2	67.5	56.9	399.4	49.8	66.3	242.9	44.6	82.1	237.6	68.6	32.2	3006.43	3638.68	2590.61	2279.14
[R].LIFAGKQLEDGR.[T]	1xBiotin [K6]	4	10	P62979	P62979 [43-54]	P62979 1xBiotin [K48]	Ubiquitin-40S ribosomal protein S27a OS=Homo sapiens OX=9606 GN=RPS27A PE=1 SV=2	1	1572.82	1.608	1.798	0.874	0.69	0.85	-0.19	0.846824	0.135478	0.994498	1	0.509473	1	74.9	53.5	136	120.4	96.3	118.9	70.3	64.8	88.6	50.2	54.4	17.2	211.4	127.6	54.9	113	92.8	131.6	90.4	106.1	90	111.6	222.1	103.1	9897.69	9133.23	12475.3	7078.76
[K].SYKVSTSGPR.[A]	1xBiotin [K3]	2	28	P05787	P05787 [9-18]	P05787 1xBiotin [K11]	Keratin, type II cytoskeletal 8 OS=Homo sapiens OX=9606 GN=KRT8 PE=1 SV=7	1	1307.64	1.563	1.784	1.89	0.64	0.84	0.92	0.290598	0.353877	0.209484	1	1	0.827398	71.5	81.2	66	111.8	144.8	124.8	50.7	82	71	80.6	94.8	79.1	57.5	65.6	80	98.6	124	111	82.9	143.9	210.7	79.5	164.1	123.9	62391.9	100831	87344.6	99140.5
[R].TFQKWAAVVVPSGEEQR.[Y]	1xBiotin [K4]	1	3	P01889	P01889 [264-280]	P01889 1xBiotin [K267]	HLA class I histocompatibility antigen, B alpha chain OS=Homo sapiens OX=9606 GN=HLA-B PE=1 SV=3	1	2158.07	1.837	1.783	1.802	0.88	0.83	0.85	0.366947	0.701035	0.47745	1	1	1	68.3	83.8	61.8	125.3	149.5	111.3	67.8	64.5	58.1	79.2	110.4	45.2	48.6	106.8	58.3	206.3	77.5	118.4	160.1	71.7	141.1	188.7	92.1	105.1	2287.28	2175.67	1961.01	2672.38
[R].KNFDQEPLGK.[E]	1xBiotin [K1]	2	22	Q8IZJ1	Q8IZJ1 [153-162]	Q8IZJ1 1xBiotin [K153]	Netrin receptor UNC5B OS=Homo sapiens OX=9606 GN=UNC5B PE=1 SV=2	1	1401.68	1.737	1.783	1.585	0.8	0.83	0.66	0.725897	0.557065	0.68633	1	1	1	72.7	82.6	66.3	126.2	147.2	105.1	77.9	68.8	76.8	80.3	104.2	87.2	67.4	88.2	70	141.6	58.6	133.4	84.6	184.2	155.5	83.6	126.9	111	13622.8	12038.5	13438.2	14047.7
[K].YGQPLPGYTTKGK.[E]	1xBiotin [K11]	2	4	P17936	P17936 [268-280]	P17936 1xBiotin [K278]	Insulin-like growth factor-binding protein 3 OS=Homo sapiens OX=9606 GN=IGFBP3 PE=1 SV=2	1	1635.82	1.67	1.782	1.571	0.74	0.83	0.65	0.10198	0.0393174	0.254759	0.48409	0.213369	0.961669	76	73.5	75	126.9	131	117.7	73.1	76.7	100.9	74.3	80.4	64.9	80.7	75.7	74	128.2	112.9	145.9	90.6	132.4	156.2	81.8	132.3	118.9	10779.9	11313.9	14873.9	10950.3
[K].LLSKTPELNLDQFHDK.[T]	1xBiotin [K4]	3	4	P27824	P27824 [167-182]	P27824 1xBiotin [K170]	Calnexin OS=Homo sapiens OX=9606 GN=CANX PE=1 SV=2	1	2124.08	1.157	1.778	1.041	0.21	0.83	0.06	0.912112	0.967769	0.999559	1	1	1	67.7	92.1	97	78.4	163.8	101	78.8	63.4	53.2	145.4	86.2	38.1	138.7	90.8	74.2	214.7	66.9	73.3	196.1	46.2	153.2	140.2	46.3	94.5	3562.14	2865.82	2405.67	6575.23
[R].VGKIITVEK.[H]	1xBiotin [K3]	1	1	P54577	P54577 [372-380]	P54577 1xBiotin [K374]	Tyrosine--tRNA ligase, cytoplasmic OS=Homo sapiens OX=9606 GN=YARS1 PE=1 SV=4	1	1212.7	0.849	1.775	1.095	-0.24	0.83	0.13	0.990484	1	0.953982	1	1	1	99	66.7	110.6	84	118.5	121.2	188.6	95.2	107.8	72.7	49.8	100.6	26.3	120.4	125.6	91.5	73.4	116.3	19	129	132.4	80.1	131.9	139.4	14885.9	7512.03	8508.96	5734.7
[R].YVQKGEYR.[T]	1xBiotin [K4]	17	32	P16070	P16070 [155-162]	P16070 1xBiotin [K158]	CD44 antigen OS=Homo sapiens OX=9606 GN=CD44 PE=1 SV=3	1	1268.61	1.969	1.775	1.92	0.98	0.83	0.94	0.1527	0.0598412	0.0939516	0.639043	0.293706	0.435505	68.1	64.6	74.8	134.2	114.7	143.6	65.8	56.5	72.1	62.4	53.2	85.1	57.1	99.3	72.2	79.9	129.5	139.3	98.3	201.2	110.7	126.4	138.6	152.4	83910.7	72141.4	91987.6	79590.5
[R].LNVFAKPEATEVSPNK.[G]	1xBiotin [K6]	1	5	P50895	P50895 [141-156]	P50895 1xBiotin [K146]	Basal cell adhesion molecule OS=Homo sapiens OX=9606 GN=BCAM PE=1 SV=2	0	1970.01	1.953	1.772	3.187	0.97	0.82	1.67	0.700847	0.938253	0.968399	1	1	1	57	92.6	41.9	111.3	164	133.4	50.7	69.7	33.1	212.6	82.4	45.7	198.2	36.9	37.3	86.4	108	99.1	161.1	123.8	146	48.3	142	118.8	2491.86	3424.03	1624.19	10444.2
[K].AVTKAQK.[K]	1xBiotin [K4]	13	2	Q16778; P58876	Q16778 [18-24]; P58876 [18-24]	Q16778 1xBiotin [K21]; P58876 1xBiotin [K21]	Histone H2B type 2-E OS=Homo sapiens OX=9606 GN=H2BC21 PE=1 SV=3 Histone H2B type 1-D OS=Homo sapiens OX=9606 GN=H2BC5 PE=1 SV=2	1	971.534	2.47	1.77	1.515	1.3	0.82	0.6	0.0167475	0.436049	0.121201	0.104802	1	0.539346	47.1	73.7	92.5	116.3	130.4	140.2	44.7	60.7	18.2	62.5	94.3	70	43.7	89.9	87.9	110.5	107.9	130.2	159.4	123.9	109	132.3	221.5	133.2	7338.98	9953.32	2987.82	10258.4
[R].KLLEGEESR.[LI]	1xBiotin [K1]	7	28	P08729; P08670; P05787	P08729 [394-402]; P08670 [402-410]; P05787 [393-401]	P08729 1xBiotin [K394]; P08670 1xBiotin [K402]; P05787 1xBiotin [K393]	Keratin, type II cytoskeletal 7 OS=Homo sapiens OX=9606 GN=KRT7 PE=1 SV=5 Vimentin OS=Homo sapiens OX=9606 GN=VIM PE=1 SV=4 Keratin, type II cytoskeletal 8 OS=Homo sapiens OX=9606 GN=KRT8 PE=1 SV=7	1	1286.64	1.767	1.76	1.789	0.82	0.82	0.84	0.110218	0.428888	0.548847	0.514481	1	1	71	71.7	73.7	125.5	126.2	131.8	82.7	57.8	69.8	70.4	66.4	95.4	115.2	72.4	59.4	154.7	114.6	123.3	90.3	123.9	141	73.1	160	129.5	82367.4	57616.2	69480.8	70157.9
[R].FLYLGPFKDSATVR.[I]	1xBiotin [K8]	2	9	P55285	P55285 [358-371]	P55285 1xBiotin [K365]	Cadherin-6 OS=Homo sapiens OX=9606 GN=CDH6 PE=1 SV=1	1	1839.95	1.84	1.751	1.045	0.88	0.81	0.06	0.289122	0.905493	0.948955	1	1	1	75.2	77.1	85.2	138.4	135	89	50.6	48.8	35.2	50	48.6	76.5	39.3	69.9	55.2	552.2	89.8	58.3	181.1	57.1	87.6	188.7	57.7	53.6	2739.49	2643.49	1907.17	2709.69
[K].LSEGVTISYKSYCK.[N]	1xBiotin [K10]; 1xCarbamidomethyl [C13]	5	6	P05556	P05556 [389-402]	P05556 1xBiotin [K398]	Integrin beta-1 OS=Homo sapiens OX=9606 GN=ITGB1 PE=1 SV=2	1	1860.89	1.193	1.736	1.193	0.26	0.8	0.25	0.902591	0.539176	0.365735	1	1	1	74.3	92.6	83.7	88.7	160.7	99.9	77.7	70.9	66.9	60.7	88.3	91.9	42.7	86.5	79.9	83.6	129.5	84.6	153.3	82.9	181.7	80.3	95.3	243.4	3344.75	3050.21	2876.86	2610.92
[R].KVTVNVLSPR.[Y]	1xBiotin [K1]	1	36	P05362	P05362 [469-478]	P05362 1xBiotin [K469]	Intercellular adhesion molecule 1 OS=Homo sapiens OX=9606 GN=ICAM1 PE=1 SV=2	1	1338.76	0.949	1.726	1.284	-0.07	0.79	0.36	0.993138	0.347875	0.410279	1	0.998739	1	102.8	80.7	78.7	97.6	139.3	101	117.4	74.1	101.1	66.4	114.5	79.3	50	79.7	77.4	86.3	96	148.6	95.2	137	170.7	90.6	116.4	99.4	79544.9	50216.7	68503.7	45010.6
[-].MSILKIHAR.[E]	1xBiotin [K5]; 1xMet-loss+Acetyl [N-Term]	1	20	P06733	P06733 [1-9]	P06733 1xBiotin [K5]; 1xMet-loss+Acetyl [N-Term]	Alpha-enolase OS=Homo sapiens OX=9606 GN=ENO1 PE=1 SV=2	1	1205.68	0.999	1.719	1.654	0	0.78	0.73	0.999906	0.535285	0.326115	1	1	1	115.6	60.4	77.1	115.5	103.9	127.5	113.2	80	136.4	57	120.1	59.2	75.5	72.2	77.6	96.8	128.8	113.1	84.7	133.4	101.8	92.8	124.9	132.5	49615.8	35045.8	59741.3	24980.9
[K].KELLLPGNNR.[K]	1xBiotin [K1]	1	2	P05362	P05362 [67-76]	P05362 1xBiotin [K67]	Intercellular adhesion molecule 1 OS=Homo sapiens OX=9606 GN=ICAM1 PE=1 SV=2	1	1379.75	1.596	1.716	1.336	0.67	0.78	0.42	0.547908	0.353445	0.891553	1	1	1	79.6	81.7	73.4	127	140.2	98.1	71.3	90.1	78.3	58.6	94.4	80.4	72.3	148.9	42.1	125	99.5	146.9	144	137.9	107.7	96.5	119.8	86.3	78539.3	99315.3	86283.1	64579.4
[RK].KFDQLLAEEK.[ANST]	1xBiotin [K1]	14	11	P35580; P35579	P35580 [1452-1461]; P35579 [1445-1454]	P35580 1xBiotin [K1452]; P35579 1xBiotin [K1445]	Myosin-10 OS=Homo sapiens OX=9606 GN=MYH10 PE=1 SV=3 Myosin-9 OS=Homo sapiens OX=9606 GN=MYH9 PE=1 SV=4	1	1446.73	1.006	1.702	1.912	0.01	0.77	0.93	0.998266	0.281088	0.509688	1	0.853008	1	112	75.7	58.6	112.7	128.8	112.1	46.3	114.9	148.3	88.2	77.6	23.1	54	60.1	92.1	115.5	84.9	124.8	98.4	142.3	132.1	98.7	115	183.7	3310.15	8207.27	10598.2	6304.22
[R].DGKLVSESSDVLPK.[-]	1xBiotin [K3]	2	30	P05787	P05787 [470-483]	P05787 1xBiotin [K472]	Keratin, type II cytoskeletal 8 OS=Homo sapiens OX=9606 GN=KRT8 PE=1 SV=7	1	1699.86	1.228	1.701	1.369	0.3	0.77	0.45	0.979346	0.101084	0.935351	1	0.435315	1	87.5	76.8	83.5	107.4	130.6	114.3	97.4	70.7	84.8	74.4	77.4	11.2	105.2	72	80.9	143.8	90.8	104.2	126.6	151.6	120.9	90.4	110.8	186.8	16979.5	12326.5	14781.9	12972.9
[K].AQDLFGDDHNKNGFK.[M]	1xBiotin [K]	1	9	P08582	P08582 [645-659]	P08582 1xBiotin [K]	Melanotransferrin OS=Homo sapiens OX=9606 GN=MELTF PE=1 SV=2	1	1931.87	0.823	1.693	1.019	-0.28	0.76	0.03	0.988267	0.846164	1	1	1	1	96.6	75.3	109.6	79.4	127.5	111.7	414.4	28.1	85.7	69	66.8	41.9	104.5	71.4	97.2	93	62.6	70.5	117	113	79.8	122.1	99.1	64.1	38928.5	2643.84	8045.69	6482.09
[K].VTQQGLKMVVPGLDGAQIPR.[D]	1xBiotin [K7]	1	4	P49327	P49327 [1152-1171]	P49327 1xBiotin [K1158]	Fatty acid synthase OS=Homo sapiens OX=9606 GN=FASN PE=1 SV=3	1	2333.25	1.233	1.693	0.93	0.3	0.76	-0.1	0.822821	0.626415	0.999997	1	1	1	72.9	92.4	97.5	89.9	156.5	90.7	27.8	71.1	59.8	27.8	75.9	75.8	130.2	54	80	273.1	73.8	48.6	312.6	62.2	128.4	192	74.4	32.6	1413.01	3613.28	3040.62	1411.96
[R].MVGKCYVR.[G]	1xBiotin [K4]; 1xCarbamidomethyl [C5]	2	3	P26006	P26006 [158-165]	P26006 1xBiotin [K161]	Integrin alpha-3 OS=Homo sapiens OX=9606 GN=ITGA3 PE=1 SV=5	1	1238.58	1.088	1.692	1.544	0.12	0.76	0.63	0.907024	0.815872	0.993277	1	1	1	88.3	81.8	76.8	96.1	138.4	118.6	18.8	112.6	91.2	67.3	122.8	84.5	75.2	79.3	102.5	59.5	99.2	109.1	187.8	143	113.2	64.7	146.9	122.5	2504.59	15040.6	12184.5	8989.25
[K].VVSETNDTKVLR.[H]	1xBiotin [K9]	1	21	P05783	P05783 [418-429]	P05783 1xBiotin [K426]	Keratin, type I cytoskeletal 18 OS=Homo sapiens OX=9606 GN=KRT18 PE=1 SV=2	1	1586.82	1.856	1.69	2.67	0.89	0.76	1.42	0.94548	0.440949	0.11215	1	1	0.507527	73.9	63.6	59.4	137.1	107.5	158.5	231.7	67.3	61.3	58	59.3	47	54.1	42.7	62.1	91	193	124.9	98	96.4	104.9	84	179.9	144.4	110784	32180.9	29305.5	27730.3
[K].FELGKLMELHGEGSSSGK.[A]	1xBiotin [K5]	1	1	P61247	P61247 [223-240]	P61247 1xBiotin [K227]	40S ribosomal protein S3a OS=Homo sapiens OX=9606 GN=RPS3A PE=1 SV=2	1	2132.02	0.662	1.685	0.796	-0.59	0.75	-0.33	0.997058	0.604203	0.934125	1	1	1	103	80.1	119	68.2	135	94.7	54.3	118.4	81.2	73.8	63.1	44.9	352.3	93.8	49.1	103.8	53.8	50.4	231.8	77.4	106.4	118.6	52.1	74.7	1906.76	4160.39	2853.87	2594.07
[R].YLENGKETLQR.[AT]	1xBiotin [K6]	8	18	P04439; P10321	P04439 [195-205]; P10321 [195-205]	P04439 1xBiotin [K200]; P10321 1xBiotin [K200]	HLA class I histocompatibility antigen, A alpha chain OS=Homo sapiens OX=9606 GN=HLA-A PE=1 SV=2 HLA class I histocompatibility antigen, C alpha chain OS=Homo sapiens OX=9606 GN=HLA-C PE=1 SV=3	1	1576.78	1.404	1.685	1.709	0.49	0.75	0.77	0.250199	0.162233	0.12305	0.949987	0.588534	0.544783	76.4	84.6	69.9	107.2	142.5	119.5	69.8	69.6	59.3	102.3	77.1	76.4	63.7	51.3	71.5	85	155.5	97.8	253.3	130	99	109	127.2	102.1	11782.5	11760.6	10017	17277.9
[R].KSTDSPVECMGQEK.[G]	1xBiotin [K1]; 1xCarbamidomethyl [C9]; 1xOxidation [M10]	1	25	P13726	P13726 [233-246]	P13726 1xBiotin [K233]	Tissue factor OS=Homo sapiens OX=9606 GN=F3 PE=1 SV=1	1	1837.78	1.631	1.683	0.939	0.71	0.75	-0.09	0.99911	0.826107	0.999256	1	1	1	76.9	83	90.2	125.5	139.7	84.7	201.4	66.4	66.5	41.8	96.3	71.8	55.8	78	129.6	108.5	88.5	139.5	60.6	161.6	120.8	65.3	174.5	73.2	56870.6	18754.6	18784.6	11818.1
[R].HVKLNVEER.[S]	1xBiotin [K3]	2	3	P29317	P29317 [160-168]	P29317 1xBiotin [K162]	Ephrin type-A receptor 2 OS=Homo sapiens OX=9606 GN=EPHA2 PE=1 SV=2	1	1349.7	3.083	1.679	2.302	1.62	0.75	1.2	0.986086	0.989201	0.876459	1	1	1	25.4	67.6	95.5	78.2	113.5	219.8	203.1	12.3	20.2	250.7	54	20.3	153.6	14.1	76.2	62.4	46.5	83.1	167.7	90.6	79.2	230.6	175.4	60.1	27714.5	1675.27	2760.8	34206.4
[K].LVSEAKAQLR.[D]	1xBiotin [K6]	1	10	P35052	P35052 [378-387]	P35052 1xBiotin [K383]	Glypican-1 OS=Homo sapiens OX=9606 GN=GPC1 PE=1 SV=2	1	1340.74	2.052	1.671	1.472	1.04	0.74	0.56	0.133867	0.274484	0.629849	0.593728	0.838526	1	62.3	75.8	83.9	127.7	126.7	123.6	22.6	65	58.7	26.8	71.5	75	79.2	61.6	105.5	201.1	76.9	120.5	94.1	161.4	119.6	116.6	236.4	107.5	2139.81	6143.02	5552.87	2533.6
[K].TYVKGTQK.[L]	1xBiotin [K4]	2	28	O95084	O95084 [182-189]	O95084 1xBiotin [K185]	Serine protease 23 OS=Homo sapiens OX=9606 GN=PRSS23 PE=1 SV=1	1	1150.59	1.146	1.668	1.278	0.2	0.74	0.35	0.642074	0.0233076	0.324902	1	0.140477	1	79.5	73.7	102.2	91.1	122.9	130.6	96.4	60.2	80.6	88.7	73.4	74.7	85	103.6	109.6	90.9	92.3	95.2	131.3	124.6	110.5	106.1	132.4	144.3	109682	68499	91625.5	100852
[K].ILCNKCTTR.[E]	1xBiotin [K5]; 2xCarbamidomethyl [C3; C6]	5	2	Q13642	Q13642 [87-95]	Q13642 1xBiotin [K91]	Four and a half LIM domains protein 1 OS=Homo sapiens OX=9606 GN=FHL1 PE=1 SV=4	1	1391.66	0.792	1.667	1.921	-0.34	0.74	0.94	0.945819	0.661767	0.928037	1	1	1	91.3	83.7	72.9	72.4	139.6	140.1	83.3	92.3	97.7	36	84.6	86.9	73.7	37.8	220.9	33.1	73.1	101.3	76.9	141	170	91.4	141.5	158.7	3567.61	3953.29	4184.53	1542.09
[K].KGPQVR.[D]	1xBiotin [K1]	1	12	P05783	P05783 [119-124]	P05783 1xBiotin [K119]	Keratin, type I cytoskeletal 18 OS=Homo sapiens OX=9606 GN=KRT18 PE=1 SV=2	1	910.493	1.139	1.663	1.429	0.19	0.73	0.51	0.990503	0.435791	0.922582	1	1	1	87.2	73.1	90.1	99.4	121.6	128.7	108.3	80.4	64.4	107.8	66.6	67.4	135.7	59.5	83	91.6	83.2	113.3	88.3	202.8	112.1	92.6	118.6	124.1	117777	87445.6	70053.8	117218
[K].KNHEEEVK.[G]	1xBiotin [K1]	1	20	P05783	P05783 [215-222]	P05783 1xBiotin [K215]	Keratin, type I cytoskeletal 18 OS=Homo sapiens OX=9606 GN=KRT18 PE=1 SV=2	1	1238.58	1.316	1.659	2.236	0.4	0.73	1.16	0.513662	0.0467572	0.0341213	1	0.241007	0.193017	77.9	67.2	74.4	102.6	111.6	166.3	76.4	76.5	66.3	48.4	82.1	65.9	94	60.3	72.9	100.6	77.3	140.7	106.8	163.3	109.4	111.9	183.8	163.1	43563.5	43628.3	37811.8	27613.3
[R].SVNTHDYAKVK.[E]	1xBiotin [K9]	3	16	O00339	O00339 [67-77]	O00339 1xBiotin [K75]	Matrilin-2 OS=Homo sapiens OX=9606 GN=MATN2 PE=1 SV=4	1	1487.73	1.087	1.654	1.376	0.12	0.73	0.46	0.610726	0.989211	0.985737	1	1	1	89	78.1	87.2	96.7	129.1	120	3.8	96.5	83.4	73.2	148.2	55.8	58.5	96.7	81.8	90.7	82.9	111.9	121.2	103.4	165.4	60	254	112.5	2570.39	64478.2	55765.4	48946.5
[K].DSYVGDEAQSKR.[G]	1xBiotin [K11]	6	6	P60709	P60709 [51-62]	P60709 1xBiotin [K61]	Actin, cytoplasmic 1 OS=Homo sapiens OX=9606 GN=ACTB PE=1 SV=1	1	1580.7	2.44	1.651	2.664	1.29	0.72	1.41	0.115574	0.685908	0.0896481	0.533881	1	0.42011	65	74	49.2	158.5	122.2	131.1	87.2	61	59.3	106.6	69.5	56.2	88.9	46.2	41.5	149	119	176.1	114.8	151.4	78.5	81.8	189.8	123.2	4107.86	2875.53	2791.45	5022.26
[K].GNFKLVR.[H]	1xBiotin [K4]	1	9	P41091	P41091 [122-128]	P41091 1xBiotin [K125]	Eukaryotic translation initiation factor 2 subunit 3 OS=Homo sapiens OX=9606 GN=EIF2S3 PE=1 SV=3	1	1059.58	1.644	1.65	2.134	0.72	0.72	1.09	0.222738	0.814316	0.740933	0.87201	1	1	73	82.8	59.9	120.1	136.5	127.7	9	73.2	81.3	37.1	107.7	82.9	42.4	60	80	105.9	120.3	188.8	86.3	194.4	136.8	70.7	195.2	127.9	1422.43	11579.9	12867.3	5877.36
[R].LEKPAK.[Y]	1xBiotin [K3]	2	17	P04406	P04406 [249-254]	P04406 1xBiotin [K251]	Glyceraldehyde-3-phosphate dehydrogenase OS=Homo sapiens OX=9606 GN=GAPDH PE=1 SV=3	0	911.502	1.175	1.649	1.084	0.23	0.72	0.12	0.899307	0.367513	0.983424	1	1	1	78.2	85	98.2	91.9	140.2	106.5	68.3	77.6	79.6	84.3	83	104.7	63.8	97.4	137	76.9	91.1	106.4	98	168.1	139	89.4	105.6	129.9	26148.9	29673.7	30449.9	32235.4
[R].NNKFDLK.[K]	1xBiotin [K3]	3	8	P08581	P08581 [593-599]	P08581 1xBiotin [K595]	Hepatocyte growth factor receptor OS=Homo sapiens OX=9606 GN=MET PE=1 SV=4	1	1104.55	1.048	1.639	1.155	0.07	0.71	0.21	0.906972	0.506965	0.968498	1	1	1	95.6	87.9	80	100.2	144.1	92.3	114.8	44.9	98.1	90.2	86	97.9	95.7	82.1	76	102.8	75.5	125	98.9	165.4	147.8	92.2	112	94.8	24156	9455.5	20645.1	18982
[K].VETFSGVYKK.[L]	1xBiotin [K]	1	6	P62081	P62081 [170-179]	P62081 1xBiotin [K]	40S ribosomal protein S7 OS=Homo sapiens OX=9606 GN=RPS7 PE=1 SV=1	1	1383.7	2.704	1.638	1.869	1.44	0.71	0.9	0.0628424	0.208659	0.561563	0.32545	0.699898	1	45.1	89.5	68.6	121.9	146.6	128.2	58.8	40	43.9	87.2	87.8	66.4	39.9	66.8	91.6	122.6	118.8	116	111.2	142.9	271.9	55	154.3	124.9	2448.3	1664.43	1829.06	3631.54
[K].MGPSFPSPKPGSER.[L]	1xBiotin [K9]; 1xOxidation [M1]	2	1	Q92692	Q92692 [89-102]	Q92692 1xBiotin [K97]	Nectin-2 OS=Homo sapiens OX=9606 GN=NECTIN2 PE=1 SV=1	0	1715.79	0.523	1.637	1.041	-0.94	0.71	0.06	0.963258	0.900126	0.999993	1	1	1	84.5	98.6	103.6	44.2	161.4	107.8	76.1	99	80.6	94	95.7	78.8	98.7	87.2	104	42.1	141.8	40.9	58.9	253.9	153.9	54.6	137.1	102.8	2924.89	3803.31	3094.38	3611.56
[K].VTKSAQK.[A]	1xBiotin [K3]	3	11	P68104	P68104 [451-457]	P68104 1xBiotin [K453]	Elongation factor 1-alpha 1 OS=Homo sapiens OX=9606 GN=EEF1A1 PE=1 SV=1	1	987.529	1	1.631	2.427	0	0.71	1.28	0.893438	0.925574	0.0596444	1	1	0.309826	85.6	66.4	74.2	85.6	108.3	180	81.9	83.9	45.8	50.1	98.5	63.5	93.1	71	66.1	81.9	79.4	115.3	48.9	136.3	103.6	143.3	172.3	265.1	24567.5	25165.3	13728.9	15020.6
[R].IAKAVNEK.[S]	1xBiotin [K3]	2	4	P06733	P06733 [328-335]	P06733 1xBiotin [K330]	Alpha-enolase OS=Homo sapiens OX=9606 GN=ENO1 PE=1 SV=2	1	1098.6	1.492	1.63	1.784	0.58	0.71	0.84	0.133338	0.129806	0.26933	0.593356	0.49973	1	79.9	69.9	77.9	119.3	114	138.9	79.4	69.3	79.3	41.1	85.6	69.4	77.3	51.7	86.1	118.2	118.4	203.5	113.1	131.5	108.4	77.6	137.9	152.4	8887.94	7761.11	8880.36	4604.83
[K].NNGVTKTWDR.[L]	1xBiotin [K6]	1	19	O75841	O75841 [143-152]	O75841 1xBiotin [K148]	Uroplakin-1b OS=Homo sapiens OX=9606 GN=UPK1B PE=1 SV=5	1	1416.67	1.296	1.625	2.219	0.37	0.7	1.15	0.98194	0.210813	0.605629	1	0.703479	1	82.3	63.4	76	106.6	103.1	168.7	89.2	48.6	101.9	15.4	88.5	68.7	72.1	82.4	82.5	117.2	72.4	115.5	168.7	111.7	91.9	91.5	199	182.8	22147.2	12084.1	25320.9	3819.92
[R].KEWDLSEYSYK.[D]	1xBiotin [K1]	2	4	P26006	P26006 [230-240]	P26006 1xBiotin [K230]	Integrin alpha-3 OS=Homo sapiens OX=9606 GN=ITGA3 PE=1 SV=5	1	1673.75	0.906	1.621	1.01	-0.14	0.7	0.01	0.999496	0.925822	0.999291	1	1	1	81.4	98.9	92.4	73.8	160.2	93.3	76.6	54.7	76.4	110.5	59.6	92.8	176.8	86.7	33.1	157.7	45.3	69.3	240.6	63.8	150.4	160.2	57.7	87.6	3368	2406.38	3362.08	4857.91
[K].IDDKGMAPALR.[H]	1xBiotin [K4]; 1xOxidation [M6]	2	14	P05121	P05121 [89-99]	P05121 1xBiotin [K92]	Plasminogen activator inhibitor 1 OS=Homo sapiens OX=9606 GN=SERPINE1 PE=1 SV=1	1	1428.7	1.169	1.619	1.645	0.22	0.69	0.72	0.905117	0.558305	0.242649	1	1	0.928186	84	83.8	75	98.1	135.7	123.4	82.3	57.8	151.4	86.6	82.1	70.3	42.7	78.3	73.6	96.2	95.3	168.2	91.2	147.5	133	91.7	131	121	25416.5	17868.4	46755.6	26749.3
[R].LYDSMKGK.[G]	1xBiotin [K6]	2	6	P07355	P07355 [274-281]	P07355 1xBiotin [K279]	Annexin A2 OS=Homo sapiens OX=9606 GN=ANXA2 PE=1 SV=2	1	1167.55	1.066	1.616	1.585	0.09	0.69	0.66	0.941015	0.629964	0.864735	1	1	1	94	63.9	92.4	100.1	103.2	146.5	33.6	105.9	102.6	16.7	69.7	118.2	100.8	31.9	126.7	101.5	109.3	125.5	137.4	112.6	94	77.2	159.9	176.5	3344.19	10552.5	10222.6	1667.83
[K].KNLQYYDISAK.[S]	1xBiotin [K1]	1	3	P62826	P62826 [142-152]	P62826 1xBiotin [K142]	GTP-binding nuclear protein Ran OS=Homo sapiens OX=9606 GN=RAN PE=1 SV=3	1	1568.78	1.87	1.615	0.689	0.9	0.69	-0.54	0.926281	0.771293	0.964851	1	1	1	59.6	69.5	146.3	111.5	112.2	100.8	163.5	57.4	46.2	29.2	120.9	66.9	82.6	165.4	140.8	79.8	148.6	107.4	85.7	113.9	108	68.6	118.2	97.1	8949.34	3142.97	2530.71	1595.85
[K].KSCPNPGEIR.[N]	1xBiotin [K1]; 1xCarbamidomethyl [C3]	7	7	P08174	P08174 [161-170]	P08174 1xBiotin [K161]	Complement decay-accelerating factor OS=Homo sapiens OX=9606 GN=CD55 PE=1 SV=4	1	1383.65	1.194	1.606	1.202	0.26	0.68	0.27	0.986866	0.912774	0.92112	1	1	1	94.1	79.9	84.1	112.4	128.3	101.2	98.3	94.1	77.9	64.4	79.9	101.1	28.9	150.9	84.2	112.4	99.8	125.1	84.9	128.3	137.2	58.8	172.4	101.2	8714.52	8344.37	6910.08	5712.49
[K].LPVTVGFSGCVKR.[L]	1xBiotin [K12]; 1xCarbamidomethyl [C10]	1	13	O15230	O15230 [3481-3493]	O15230 1xBiotin [K3492]	Laminin subunit alpha-5 OS=Homo sapiens OX=9606 GN=LAMA5 PE=1 SV=8	1	1645.86	1.149	1.603	1.726	0.2	0.68	0.79	0.999508	0.460581	0.871641	1	1	1	77.3	82.5	80.4	88.8	132.2	138.7	66.4	80.7	95.4	86	123.2	15.4	73.4	85.7	83.8	92.7	82.5	100.1	97	140.5	138	67.6	226.9	144.7	6555.84	7962.15	9410.37	8490.54
[K].GQPLCVLSAMKMETVVTSPMEGTVR.[K]	1xBiotin [K11]; 1xCarbamidomethyl [C5]; 3xOxidation [M10; M12; M20]	1	5	P11498	P11498 [1134-1158]	P11498 1xBiotin [K1144]	Pyruvate carboxylase, mitochondrial OS=Homo sapiens OX=9606 GN=PC PE=1 SV=2	1	2995.41	0.904	1.597	1.367	-0.15	0.67	0.45	0.999999	0.924762	0.999266	1	1	1	124.8	77.1	68.5	112.9	123	93.7	355	54.2	22.2	36.8	33.4	30.1	205.7	29.7	28.3	226.7	49	48.6	53.4	39.3	196.9	318.7	40.7	31.4	25929.1	3955.55	1623.13	2690.16
[R].ISSTPAKLEQR.[T]	1xBiotin [K7]	1	12	P98160	P98160 [3149-3159]	P98160 1xBiotin [K3155]	Basement membrane-specific heparan sulfate proteoglycan core protein OS=Homo sapiens OX=9606 GN=HSPG2 PE=1 SV=4	1	1455.76	1.234	1.595	1.086	0.3	0.67	0.12	0.953698	0.858181	0.999996	1	1	1	86.1	78.5	97.8	106.2	125.2	106.2	62.1	87.7	110.7	78.5	102.1	80	58.4	99.6	140.9	84	108.2	133.2	96.9	132.8	127.6	48.9	140.3	108.2	10472	14777.9	18666.3	13228.8
[R].VEYAKSGR.[A]	1xBiotin [K5]	1	10	P09874	P09874 [11-18]	P09874 1xBiotin [K15]	Poly [ADP-ribose] polymerase 1 OS=Homo sapiens OX=9606 GN=PARP1 PE=1 SV=4	1	1135.56	1.408	1.595	1.554	0.49	0.67	0.64	0.307237	0.697908	0.407254	1	1	1	78.5	84.6	75	110.6	134.9	116.5	73.1	77.6	41.9	78.7	104.5	49.3	69.8	73.9	61.5	202.6	88	102.9	68.7	125.5	182	92.8	108.4	199	14025.6	14885.3	8031.93	15099.8
[K].AGAVEKGVPLYR.[H]	1xBiotin [K6]	2	12	P06733	P06733 [121-132]	P06733 1xBiotin [K126]	Alpha-enolase OS=Homo sapiens OX=9606 GN=ENO1 PE=1 SV=2	1	1485.79	1.245	1.586	1.381	0.32	0.67	0.47	0.789944	0.0563477	0.403475	1	0.279644	1	90.5	77.8	82.2	112.7	123.3	113.5	90.5	103.6	92	79.1	89.7	62.4	71.5	94.5	83.6	108.3	114.6	116.9	91.1	147.5	125.4	85.4	128.3	115.5	17977.3	20580.3	18286.2	15716.1
[K].KGGDLPSDK.[A]	1xBiotin [K1]	13	5	O94856	O94856 [283-291]	O94856 1xBiotin [K283]	Neurofascin OS=Homo sapiens OX=9606 GN=NFASC PE=1 SV=4	1	1142.55	1.341	1.581	1.054	0.42	0.66	0.08	0.771543	0.168074	0.954181	1	0.599944	1	84.3	72.2	105.3	113	114.2	111	115.6	89.8	59.4	48.8	85.2	77	57.6	112.2	112.8	120.4	99.7	122.8	121.7	146.5	101.2	86	124.9	118.3	11961.7	9294.16	6150.54	5054.16
[K].AKIFQVVPIPVVK.[K]	1xBiotin [K2]	1	1	Q8WUJ3	Q8WUJ3 [1345-1357]	Q8WUJ3 1xBiotin [K1346]	Cell migration-inducing and hyaluronan-binding protein OS=Homo sapiens OX=9606 GN=CEMIP PE=1 SV=2	1	1664	0.956	1.576	0.822	-0.07	0.66	-0.28	1	0.665847	0.96931	1	1	1	79.5	102.6	98.9	75.9	161.8	81.3	139.1	73	60.3	42	94.4	97.9	90.9	93	45.2	156.4	55.9	69.8	231.6	72.2	148.7	183.9	74.7	70.9	5816.86	3053.12	2521.74	1755.5
[R].VFQQVAQASKDR.[N]	1xBiotin [K10]	1	29	P05121	P05121 [42-53]	P05121 1xBiotin [K51]	Plasminogen activator inhibitor 1 OS=Homo sapiens OX=9606 GN=SERPINE1 PE=1 SV=1	1	1602.81	1.112	1.572	1.703	0.15	0.65	0.77	0.800329	0.163445	0.0659724	1	0.589726	0.334879	90.4	84.4	71	100.4	132.8	121	73	91	91.4	71.7	85	85.7	52.7	75.4	71.5	79.8	101.1	152.2	125.2	135.9	133.7	81.2	171.6	121.8	34248.8	42695.1	42868.1	33657.7
[R].KAQGVLAAQAR.[A]	1xBiotin [K1]	1	5	P55268	P55268 [1720-1730]	P55268 1xBiotin [K1720]	Laminin subunit beta-2 OS=Homo sapiens OX=9606 GN=LAMB2 PE=1 SV=2	1	1338.73	2.166	1.569	1.15	1.12	0.65	0.2	0.495172	0.454828	0.912765	1	1	1	69.8	62	102.2	151.2	97.3	117.5	63.9	41.1	139.2	56.7	93.5	40.2	51.1	93.5	100.5	138.3	89.5	191.3	89.1	189.5	88.5	107.5	133	93.4	3614.04	2326.62	7877.37	3211.48
[K].VKAFAHLQVPER.[V]	1xBiotin [K2]	1	56	P98160	P98160 [3650-3661]	P98160 1xBiotin [K3651]	Basement membrane-specific heparan sulfate proteoglycan core protein OS=Homo sapiens OX=9606 GN=HSPG2 PE=1 SV=4	1	1620.87	1.027	1.559	1.318	0.04	0.64	0.4	0.999957	0.17808	0.869879	1	0.625624	1	96.5	75.3	91.4	99	117.4	120.4	79.5	91.3	107.8	71.3	65.4	77	66.6	86.5	152.6	82.1	113.2	93.7	95.3	146.9	111.1	98.5	114	147.1	80569.3	92523	109197	72239.4
[R].IAGQVAAANKK.[H]	1xBiotin [K]	1	6	P39019	P39019 [134-144]	P39019 1xBiotin [K]	40S ribosomal protein S19 OS=Homo sapiens OX=9606 GN=RPS19 PE=1 SV=2	1	1296.71	1.385	1.558	2.641	0.47	0.64	1.4	0.872912	0.57767	0.284207	1	1	1	87.5	92	42.8	121.2	143.3	113.2	126.2	83	53	83.3	87.4	88.5	126.2	39.8	40.7	92.1	115	128.7	133.8	136.1	137.9	107.5	123.7	97	10901.2	7171.19	4576.69	7195.59
[K].AAGAGKVTK.[S]	1xBiotin [K6]	2	8	P68104	P68104 [445-453]	P68104 1xBiotin [K450]	Elongation factor 1-alpha 1 OS=Homo sapiens OX=9606 GN=EEF1A1 PE=1 SV=1	1	1028.56	1.839	1.555	2.371	0.88	0.64	1.25	0.139345	0.134636	0.0194326	0.611826	0.507737	0.12237	65.8	78.4	63.1	121.1	121.9	149.6	104.7	54.3	62.5	74.5	77.6	55.2	48.7	59.9	81.9	101	115	167.8	138.9	110.3	115.8	142.1	104.6	185.1	60534.2	31368.8	36165.2	43074
[R].DWYQKQGPGPSR.[D]	1xBiotin [K5]	1	21	P08727	P08727 [114-125]	P08727 1xBiotin [K118]	Keratin, type I cytoskeletal 19 OS=Homo sapiens OX=9606 GN=KRT19 PE=1 SV=4	1	1644.76	1.446	1.551	1.393	0.53	0.63	0.48	0.803697	0.14052	0.215574	1	0.524006	0.846444	91.1	72.3	80.5	131.7	112.2	112.2	107	78.7	71.1	54.4	62.5	69.5	69.6	52.9	76.2	113.8	92.9	148.8	92	217	96.9	91.5	208.4	96.9	16151.2	11874.6	10726.4	8207.17
[K].QLTKSNAPR.[V]	1xBiotin [K4]	4	1	P00367	P00367 [387-395]	P00367 1xBiotin [K390]	Glutamate dehydrogenase 1, mitochondrial OS=Homo sapiens OX=9606 GN=GLUD1 PE=1 SV=2	1	1240.65	0.485	1.55	0.902	-1.04	0.63	-0.15	0.997056	0.969548	0.918855	1	1	1	128.8	70.3	120.6	62.5	109	108.8	31.2	30.6	23.8	16.7	12.1	801.4	28.6	636.8	14.5	30.7	14.8	12.1	20.1	28.7	25.9	16	30.1	25.8	3849.24	3767.25	2935.4	2056.74
[K].AKSGYFLSISDSK.[C]	1xBiotin [K2]	4	6	Q86SQ4	Q86SQ4 [218-230]	Q86SQ4 1xBiotin [K219]	Adhesion G-protein coupled receptor G6 OS=Homo sapiens OX=9606 GN=ADGRG6 PE=1 SV=3	1	1628.8	2.82	1.547	1.282	1.5	0.63	0.36	0.00399186	0.114896	0.504276	0.0302792	0.469895	1	48.9	71.5	101.3	137.8	110.6	129.9	72.7	43.2	48.6	45.6	83.2	71.1	85.3	102.4	100.8	137.1	122.6	138.6	110.1	125	96.8	189.8	98	129.2	3258.2	1935.48	2179.39	2043.97
[K].IFQVVPIPVVKK.[K]	1xBiotin [K11]	1	1	Q8WUJ3	Q8WUJ3 [1347-1358]	Q8WUJ3 1xBiotin [K1357]	Cell migration-inducing and hyaluronan-binding protein OS=Homo sapiens OX=9606 GN=CEMIP PE=1 SV=2	1	1592.96	0.911	1.543	1.23	-0.13	0.63	0.3	0.99993	0.839785	0.999636	1	1	1	92.1	90	87.5	83.9	138.9	107.6	111.8	41.8	98.5	116.5	57.8	96.2	93.5	94.2	65.9	153.3	89.7	42.7	148.4	101	171.1	157.4	45.1	115	3841.79	1437.24	3382.16	4003.6
[R].VKIQAATDSK.[D]	1xBiotin [K2]	2	6	Q9UHN6	Q9UHN6 [1152-1161]	Q9UHN6 1xBiotin [K1153]	Cell surface hyaluronidase OS=Homo sapiens OX=9606 GN=CEMIP2 PE=1 SV=1	1	1286.68	1.648	1.536	1.731	0.72	0.62	0.79	0.304943	0.522227	0.739122	1	1	1	78.9	71.6	76.8	130	109.9	132.8	88.3	79.2	51.4	61.4	71.8	87.8	54.5	77	104.2	133.1	130.5	125.9	168.6	88.2	110.3	57.3	133.3	177.2	80840.8	72479.5	47065.8	56196.4
[K].CASLQKFGER.[A]	1xBiotin [K6]; 1xCarbamidomethyl [C1]	1	11	P02768	P02768 [224-233]	P02768 1xBiotin [K229]	Albumin OS=Homo sapiens OX=9606 GN=ALB PE=1 SV=2	1	1421.67	0.752	1.536	1.185	-0.41	0.62	0.24	0.979534	0.756245	0.979392	1	1	1	109.8	86.3	86.3	82.6	132.6	102.3	124.6	127.9	14.7	98	133.1	24.6	49	98	98.7	97.4	93.7	77.5	153.4	150.5	119.3	123.1	100.4	116.1	12278.7	12602.4	1449.7	9653.34
[R].VLEKLGADR.[G]	1xBiotin [K4]	1	8	Q8WUJ3	Q8WUJ3 [1306-1314]	Q8WUJ3 1xBiotin [K1309]	Cell migration-inducing and hyaluronan-binding protein OS=Homo sapiens OX=9606 GN=CEMIP PE=1 SV=2	1	1226.66	1.435	1.536	1.904	0.52	0.62	0.93	0.342638	0.264462	0.0320936	1	0.81726	0.185476	73.7	75.2	79.2	105.7	115.5	150.7	55.4	82.4	75.5	77.1	92.5	66.6	41.7	85.5	81.2	123.6	95.5	108.4	113.9	118.4	146.8	95.4	185.5	154.6	7201.09	10706.9	9814.05	10017.6
[R].IGSPEYIKSYK.[I]	1xBiotin [K8]	2	27	O43854	O43854 [237-247]	O43854 1xBiotin [K244]	EGF-like repeat and discoidin I-like domain-containing protein 3 OS=Homo sapiens OX=9606 GN=EDIL3 PE=1 SV=1	1	1510.76	0.912	1.531	1.188	-0.13	0.61	0.25	0.999989	0.185926	0.468917	1	0.643035	1	97.6	82.7	93.3	89	126.7	110.8	91.6	94.1	92.7	43.1	91.1	78.6	65.6	99.8	88.6	84.6	83.5	102.4	94.6	120.4	157.5	105.3	212.9	93.7	19269	19794.4	19511.5	9064.74
[R].VGFLKPK.[F]	1xBiotin [K5]	2	35	O95084	O95084 [192-198]	O95084 1xBiotin [K196]	Serine protease 23 OS=Homo sapiens OX=9606 GN=PRSS23 PE=1 SV=1	0	1014.58	1.12	1.53	1.444	0.16	0.61	0.53	0.881197	0.669892	0.370992	1	1	1	64.6	105.6	80.2	72.4	161.5	115.8	62.1	64.1	72.6	114.1	104.7	88.2	61.5	104.7	79.5	71.8	69.7	109.9	94.6	170.3	160.2	91.2	166	114.8	107829	111376	126164	198268
[R].KGNYAER.[VI]	1xBiotin [K1]	10	21	Q16777	Q16777 [37-43]	Q16777 1xBiotin [K37]	Histone H2A type 2-C OS=Homo sapiens OX=9606 GN=H2AC20 PE=1 SV=4	1	1063.5	1.583	1.525	1.302	0.66	0.61	0.38	0.774133	0.901512	0.976487	1	1	1	87.1	77	78.5	137.8	117.5	102.2	195.2	55.3	80.1	130.7	70.8	50.8	62.5	75.9	72.2	126.8	115.8	186.3	90.2	108.1	118.4	71.1	94	95.9	74338.8	21060.1	30498.5	49757.2
[R].KLYLQDNHINR.[V]	1xBiotin [K1]	1	6	Q9NZU0	Q9NZU0 [251-261]	Q9NZU0 1xBiotin [K251]	Leucine-rich repeat transmembrane protein FLRT3 OS=Homo sapiens OX=9606 GN=FLRT3 PE=1 SV=1	1	1639.84	1.536	1.525	1.966	0.62	0.61	0.98	0.535672	0.355964	0.893671	1	1	1	81.2	57.6	83.8	124.7	87.9	164.8	20.1	73.8	93.6	52.4	74.7	32.2	62.5	76.2	108	82.7	146.8	113.4	313.8	78.6	79.9	89.9	149.8	151.6	2434.47	8936.87	11338.5	6347.8
[R].KVIDDTNITR.[L]	1xBiotin [K1]	1	51	P05783	P05783 [187-196]	P05783 1xBiotin [K187]	Keratin, type I cytoskeletal 18 OS=Homo sapiens OX=9606 GN=KRT18 PE=1 SV=2	1	1400.72	1.336	1.518	3.629	0.42	0.6	1.86	0.861067	0.0724825	4.94577e-05	1	0.339523	0.000696895	61.9	64.3	63.4	82.6	97.6	230.2	61	60.6	104	58.8	71.7	63.3	58.6	74.6	62.5	81.4	75.4	102.3	96.2	113.9	95.7	165.5	226.8	227.7	716064	711663	1.22214e+06	691138
[R].VGFLKPKFK.[D]	1xBiotin [K7]	2	7	O95084	O95084 [192-200]	O95084 1xBiotin [K198]	Serine protease 23 OS=Homo sapiens OX=9606 GN=PRSS23 PE=1 SV=1	1	1289.74	1.225	1.512	1.696	0.29	0.6	0.76	0.998262	0.910346	0.423822	1	1	1	74.1	94	73.8	90.8	142.1	125.2	55.1	111.4	76.7	121.1	97.4	91.6	65.1	76.4	80.8	68.1	97.1	94	95.2	153.3	147.2	69.7	170.1	129.6	16379.4	33121.6	22825.3	36011.8
[K].SYGKNIDSK.[L]	1xBiotin [K4]	1	6	O15031	O15031 [744-752]	O15031 1xBiotin [K747]	Plexin-B2 OS=Homo sapiens OX=9606 GN=PLXNB2 PE=1 SV=3	1	1237.59	2.26	1.51	1.758	1.18	0.59	0.81	0.966916	0.989665	0.442269	1	1	1	57.7	86.4	70.7	130.5	130.4	124.3	54.4	242.9	43.7	66	119.2	81.3	66.6	12.7	77.8	115.7	122.9	126	81.9	151.2	122.8	74.8	123	117	10893.9	48667.8	8757.6	13218.3
[K].KSPEPVR.[F]	1xBiotin [K1]	1	4	O00622	O00622 [291-297]	O00622 1xBiotin [K291]	CCN family member 1 OS=Homo sapiens OX=9606 GN=CCN1 PE=1 SV=1	1	1038.54	0.696	1.507	1.733	-0.52	0.59	0.79	0.884811	0.758835	0.371178	1	1	1	120.3	79.8	71.7	83.7	120.2	124.3	111.8	113.8	81.3	74.2	112.4	60.7	50.4	66.7	122.6	84.4	65.6	77.8	92.4	111.8	146.9	84	227.7	115.6	95663.1	97381.3	69549	63452.8
[K].KDVLETFTVK.[S]	1xBiotin [K1]	1	21	P21926	P21926 [170-179]	P21926 1xBiotin [K170]	CD9 antigen OS=Homo sapiens OX=9606 GN=CD9 PE=1 SV=4	1	1405.74	1.205	1.506	1.202	0.27	0.59	0.26	0.964567	0.345366	0.999922	1	0.995532	1	87.1	81.2	92.9	105	122.2	111.6	83.3	74.4	111.1	98.5	77.6	59.4	154.4	88.8	80.4	94.8	110.8	100.4	116.9	133.6	91.2	93.5	106.7	123.9	13268.7	11847.8	17682.1	15680.6
[K].YPKYGYTITR.[Q]	1xBiotin [K3]	2	8	Q9NT68	Q9NT68 [954-963]	Q9NT68 1xBiotin [K956]	Teneurin-2 OS=Homo sapiens OX=9606 GN=TENM2 PE=1 SV=3	1	1487.74	1.114	1.505	1.341	0.16	0.59	0.42	0.850618	0.951942	0.908859	1	1	1	80.6	96.4	80.4	89.8	145.1	107.7	26	81.4	81.1	65.9	97	132.3	66.1	80.9	81.4	63.4	90.4	115.6	78.1	146	200.6	56.8	228.6	108.4	3390.31	10615	10584.9	8599.2
[K].KDSDSFK.[I]	1xBiotin [K1]	5	8	P05556	P05556 [438-444]	P05556 1xBiotin [K438]	Integrin beta-1 OS=Homo sapiens OX=9606 GN=ITGB1 PE=1 SV=2	1	1052.47	1.354	1.504	1.45	0.44	0.59	0.54	0.961008	0.678837	0.824082	1	1	1	76	77.2	93	102.9	116.1	134.9	76.2	132.5	70.5	77.4	74.6	83	93.3	106	82.3	103.1	93.2	118.6	77.9	126.2	116.3	79.2	154.5	135.2	23568.5	40982.5	21797.6	23936
[R].LFNDIHKFR.[D]	1xBiotin [K7]	1	23	O00622	O00622 [372-380]	O00622 1xBiotin [K378]	CCN family member 1 OS=Homo sapiens OX=9606 GN=CCN1 PE=1 SV=1	1	1415.73	1.214	1.503	1.643	0.28	0.59	0.72	0.82416	0.175875	0.365071	1	0.622033	1	82.4	79.4	82.8	100	119.3	136.1	79	69.6	106.3	76.2	46.6	83.1	79.5	79.1	97.3	78.1	96	166	110	114.5	117.3	98.5	172.4	130.6	19588.9	17246.6	26337.5	18889.8
[-].MAAANKGNKPR.[V]	1xBiotin [K6]; 1xMet-loss+Acetyl [N-Term]	1	16	Q9GZN8	Q9GZN8 [1-11]	Q9GZN8 1xBiotin [K6]; 1xMet-loss+Acetyl [N-Term]	UPF0687 protein C20orf27 OS=Homo sapiens OX=9606 GN=C20orf27 PE=1 SV=3	1	1294.67	2.129	1.502	2.484	1.09	0.59	1.31	0.0268448	0.660632	0.0697539	0.157876	1	0.350081	58.5	92.4	53.4	124.4	138.8	132.6	70.5	59.7	19.1	88.1	94.4	98.7	54.5	59.5	53.9	127.7	104.9	127.1	167.8	119.4	141.8	92.8	184.6	135.4	13864.4	11745.1	3765.76	17322.8
[-].MSLSNKLTLDK.[L]	1xBiotin [K6]; 1xMet-loss+Acetyl [N-Term]	1	6	P00558	P00558 [1-11]	P00558 1xBiotin [K6]; 1xMet-loss+Acetyl [N-Term]	Phosphoglycerate kinase 1 OS=Homo sapiens OX=9606 GN=PGK1 PE=1 SV=3	1	1386.73	0.896	1.498	2.096	-0.16	0.58	1.07	0.707513	0.852208	0.524865	1	1	1	120.2	73.3	61	107.7	109.9	127.8	533.3	90.2	78	60.7	55	49.1	27.9	45.8	56.4	101.2	80.8	76.9	141.4	82.4	58.7	67.8	98.5	95.9	38396.2	6492.32	5616.13	4366.88
[K].TYTLTDYLKNTYR.[L]	1xBiotin [K9]	1	2	P27487	P27487 [42-54]	P27487 1xBiotin [K50]	Dipeptidyl peptidase 4 OS=Homo sapiens OX=9606 GN=DPP4 PE=1 SV=2	1	1877.91	0.63	1.496	1.755	-0.67	0.58	0.81	0.382126	0.961566	0.921478	1	1	1	100.6	90.2	76.6	63.3	135	134.3	421	79.9	54.7	62.9	71.7	82.4	57.7	98.6	60.8	41.2	50.3	66	149.8	107.2	64.8	150.4	74	106.7	15667.8	2973.51	2035.65	2341.04
[SRH].FDSFTVQYKDR.[D]	1xBiotin [K9]	3	34	P22105-1	P22105-1 [1399-1409]; [2122-2132]; [2438-2448]; [2549-2559]; [2763-2773]; [2977-2987]; [3191-3201]	P22105-1 1xBiotin [K1407]; 1xBiotin [K2130]; 1xBiotin [K2446]; 1xBiotin [K2557]; 1xBiotin [K2771]; 1xBiotin [K2985]; 1xBiotin [K3199]	Isoform 3 of Tenascin-X OS=Homo sapiens OX=9606 GN=TNXB	1	1631.75	1.615	1.492	0.825	0.69	0.58	-0.28	0.13978	0.520658	0.99987	0.611826	1	1	66.7	71.5	135.6	107.7	106.7	111.9	61.7	60.3	70.2	66.2	51.4	76.4	125.5	64.1	130.8	273.7	85.2	99.6	98.7	110.7	97.5	130.1	94.3	103.5	41889	40963.3	47672.1	44912.8
[K].ELNGKQIYVGR.[A]	1xBiotin [K5]	3	6	Q9H361	Q9H361 [255-265]	Q9H361 1xBiotin [K259]	Polyadenylate-binding protein 3 OS=Homo sapiens OX=9606 GN=PABPC3 PE=1 SV=2	1	1502.78	1.74	1.491	2.04	0.8	0.58	1.03	0.21458	0.346013	0.0512823	0.847528	0.995532	0.274947	62.4	102.8	56.9	108.5	153.3	116.1	65.2	64.7	59.4	106.7	108.3	52.5	59.7	37.4	59.1	83.8	112.5	172.3	103.9	183.4	159	83.9	167.9	120.4	2505.57	2486.59	2284.01	4100.64
[R].MHAPGKGLSQSALPYR.[R]	1xBiotin [K6]	1	5	P62277	P62277 [4-19]	P62277 1xBiotin [K9]	40S ribosomal protein S13 OS=Homo sapiens OX=9606 GN=RPS13 PE=1 SV=2	1	1938.97	0.649	1.49	0.298	-0.62	0.58	-1.74	0.977843	0.987747	0.310043	1	1	1	145.5	45.3	190.5	94.4	67.5	56.8	51.6	158.8	146.5	127.6	29	45.6	213.9	131.1	191.8	95	111.2	45.1	131.8	67.9	42.2	52.3	57.2	101.4	2694.24	8291.28	7648.69	6659.37
[K].VAKAYAALAALEK.[L]	1xBiotin [K3]	7	2	Q12906	Q12906 [575-587]	Q12906 1xBiotin [K577]	Interleukin enhancer-binding factor 3 OS=Homo sapiens OX=9606 GN=ILF3 PE=1 SV=3	1	1544.85	1.074	1.481	1.126	0.1	0.57	0.17	0.994057	0.693087	0.996435	1	1	1	70.6	87.3	111.5	75.8	129.3	125.5	52.9	67	79.6	137.7	82.9	33.3	159.3	105.8	67.9	95.9	70.9	72	122.7	71.3	202.2	119.2	97.1	162.2	2275.15	2885.05	3425.4	5928.28
[K].VKVGVNGFGR.[I]	1xBiotin [K2]	1	10	P04406	P04406 [4-13]	P04406 1xBiotin [K5]	Glyceraldehyde-3-phosphate dehydrogenase OS=Homo sapiens OX=9606 GN=GAPDH PE=1 SV=3	1	1258.67	1.228	1.48	1.677	0.3	0.57	0.75	0.398394	0.897082	0.704241	1	1	1	75.9	94.2	73.8	93.2	139.3	123.7	78.9	12.7	81	98.1	98	67.1	76.7	83.1	73	97	66.4	140.7	155.7	145	99.7	108.6	128.7	189.6	21445.6	3461.49	22016.4	26643.1
[R].LSVDYGKK.[S]	1xBiotin [K]	8	11	P68363	P68363 [157-164]	P68363 1xBiotin [K]	Tubulin alpha-1B chain OS=Homo sapiens OX=9606 GN=TUBA1B PE=1 SV=1	1	1135.58	1.993	1.474	1.464	1	0.56	0.55	0.994548	0.996696	0.691853	1	1	1	71.6	73.6	82.6	142.7	108.5	121	179.4	72.1	61.1	73.1	104.9	74.1	83.2	59.4	86.7	60.9	143.7	144.5	67.5	117.7	109.2	87.5	121.8	153.4	47712.2	19176.6	16242.7	19451.2
[K].VVKQASEGPLK.[G]	1xBiotin [K3]	2	22	P04406	P04406 [261-271]	P04406 1xBiotin [K263]	Glyceraldehyde-3-phosphate dehydrogenase OS=Homo sapiens OX=9606 GN=GAPDH PE=1 SV=3	1	1381.75	1.432	1.474	1.804	0.52	0.56	0.85	0.276235	0.197806	0.255666	1	0.673649	0.961669	82.6	82.1	69.8	118.4	121.1	126	58.5	78.9	82.3	56.5	78.4	107.9	62.7	66.7	84.7	138.6	113	101.9	115.6	183.9	109.3	79.2	161.8	120.2	25887.8	34912.7	36453.8	25031.6
[K].GLGKGGAK.[CR]	1xBiotin [K4]	2	2	P62805	P62805 [10-17]	P62805 1xBiotin [K13]	Histone H4 OS=Homo sapiens OX=9606 GN=H4C1 PE=1 SV=2	1	913.492	1.468	1.473	0.986	0.55	0.56	-0.02	0.461027	0.998768	0.999795	1	1	1	85	80.6	96.1	124.8	118.8	94.8	77.6	82.5	69.7	176.9	73.6	67.4	60.4	87.7	114.9	95.1	113.9	180.2	119.3	108.4	91.1	68.1	126.7	86.5	25787.6	27441.1	23177.1	58812.5
[R].EANYIGSDKYFHAR.[G]	1xBiotin [K9]	3	20	P0DJI9	P0DJI9 [44-57]	P0DJI9 1xBiotin [K52]	Serum amyloid A-2 protein OS=Homo sapiens OX=9606 GN=SAA2 PE=1 SV=1	1	1896.87	1.085	1.471	1.117	0.12	0.56	0.16	0.987214	0.306843	0.922364	1	0.912539	1	70.5	93.2	105.2	76.5	137.1	117.5	82.6	47.6	69.3	128	57.9	91.7	103.4	88	106.2	65.3	75.2	82.3	134.8	129.5	157.8	86.4	178.5	115.5	38693.9	22293.1	32474.1	59998.1
[R].EDSQRPGAHLTVKK.[I]	1xBiotin [K]	4	5	P09651	P09651 [93-106]	P09651 1xBiotin [K]	Heterogeneous nuclear ribonucleoprotein A1 OS=Homo sapiens OX=9606 GN=HNRNPA1 PE=1 SV=5	1	1791.92	2.32	1.468	1.769	1.21	0.55	0.82	0.352416	0.664152	0.636904	1	1	1	57.2	75.6	80.8	132.6	111	142.9	17.5	107.4	60.9	29.4	80.6	89.5	18.6	88.6	86.1	167	126.3	141.3	107.3	176.7	118.3	62.3	169.8	152.3	1507.31	9268.8	5257.32	2539.36
[R].YTCHVQHEGLPKPLTLR.[W]	1xBiotin [K12]; 1xCarbamidomethyl [C3]	3	5	P01889; P04439	P01889 [281-297]; P04439 [281-297]	P01889 1xBiotin [K292]; P04439 1xBiotin [K292]	HLA class I histocompatibility antigen, B alpha chain OS=Homo sapiens OX=9606 GN=HLA-B PE=1 SV=3 HLA class I histocompatibility antigen, A alpha chain OS=Homo sapiens OX=9606 GN=HLA-A PE=1 SV=2	0	2275.15	0.89	1.462	0.842	-0.17	0.55	-0.25	0.952547	0.954233	1	1	1	1	124.9	78	93.4	111.1	114	78.6	24.5	126.9	108.3	229.2	24.2	67.6	70.2	97.5	81	96.3	182.8	75.2	98.8	92	160	68.2	59.4	138.1	3558.99	18412.4	15709.7	33255.9
[K].LKELIFEETAR.[F]	1xBiotin [K2]	2	4	P28482	P28482 [343-353]	P28482 1xBiotin [K344]	Mitogen-activated protein kinase 1 OS=Homo sapiens OX=9606 GN=MAPK1 PE=1 SV=3	1	1574.82	1.523	1.455	0.875	0.61	0.54	-0.19	0.496439	0.300107	0.998181	1	0.898304	1	70.2	78.2	123.1	107	113.7	107.8	46.5	70.2	101.7	87.3	37.7	78.2	123.2	87.7	176.2	117.7	98.5	107	98.2	113.8	115.5	96.2	107.8	136.5	2133.74	3220.13	4664.65	4004.01
[K].FAAKGEGQLGPAER.[A]	1xBiotin [K4]	1	1	P13639	P13639 [236-249]	P13639 1xBiotin [K239]	Elongation factor 2 OS=Homo sapiens OX=9606 GN=EEF2 PE=1 SV=4	1	1656.82	2.883	1.449	4.186	1.53	0.54	2.07	0.9845	0.999229	0.815137	1	1	1	45.1	97.7	35.8	129.9	141.6	149.9	48.2	135.9	22	24.3	149.7	104.6	26	97	38.3	22.6	139	203.8	24.9	220.3	151.6	59.6	171.6	160.4	3349.69	9443.94	1525.43	1687.4
[K].GTAEKLKPEDITQIQPQQLVLR.[L]	1xBiotin [K5]	5	2	P05556	P05556 [101-122]	P05556 1xBiotin [K105]	Integrin beta-1 OS=Homo sapiens OX=9606 GN=ITGB1 PE=1 SV=2	1	2731.48	1.153	1.443	0.706	0.21	0.53	-0.5	0.930028	0.802426	1	1	1	1	110.8	66.5	116.6	127.8	96	82.3	94.9	108.3	64.5	57	77	48.9	68.2	102.8	99.9	212.4	109.4	87.2	165.2	71	82.2	240.2	40.2	70.5	3506.14	4001.25	2382.52	2104.65
[K].NALIMKTK.[K]	1xBiotin [K6]	1	1	Q9NY30-2	Q9NY30-2 [189-196]	Q9NY30-2 1xBiotin [K194]	Isoform 2 of Protein BTG4 OS=Homo sapiens OX=9606 GN=BTG4	1	1144.62	0.702	1.44	0.706	-0.51	0.53	-0.5	0.999731	0.86476	1	1	1	1	87.4	102.4	118	61.4	147.5	83.3	75.9	47.5	132.2	89	127.5	50.1	102.5	95	112.3	53.3	128.2	51.5	111.3	138.6	128.1	63.5	72.3	221.1	2288.47	1431.33	3984.77	2680.58
[R].KISSPTGSK.[D]	1xBiotin [K1]	2	3	Q99623	Q99623 [89-97]	Q99623 1xBiotin [K89]	Prohibitin-2 OS=Homo sapiens OX=9606 GN=PHB2 PE=1 SV=2	1	1130.59	1.04	1.434	0.972	0.06	0.52	-0.04	0.948956	0.334402	0.999895	1	0.97473	1	80.7	90.9	108.5	84	130.4	105.4	70.2	58.7	86.5	122.6	79	65.5	94.3	87.6	115.8	69	73	131.7	106.6	244.3	113.4	82.9	107.1	91.6	8513.24	7126.41	10501.2	14877.7
[R].LKHLLQR.[A]	1xBiotin [K2]	1	7	O95980	O95980 [63-69]	O95980 1xBiotin [K64]	Reversion-inducing cysteine-rich protein with Kazal motifs OS=Homo sapiens OX=9606 GN=RECK PE=1 SV=1	1	1133.66	1.07	1.429	1.34	0.1	0.51	0.42	0.945742	0.3883	0.713742	1	1	1	92.8	86.2	84.8	99.3	123.2	113.6	42	95.5	110.1	33.8	88.7	93.8	87.3	68	105.8	79.3	102.2	120.3	126.7	141.3	97.5	105	185.6	116.9	9563.96	21734.3	25038.6	7699.48
[R].GQGEKSATPSR.[K]	1xBiotin [K5]	1	5	P46060	P46060 [402-412]	P46060 1xBiotin [K406]	Ran GTPase-activating protein 1 OS=Homo sapiens OX=9606 GN=RANGAP1 PE=1 SV=1	1	1343.64	1.277	1.424	1.171	0.35	0.51	0.23	0.751142	0.26917	0.991766	1	0.827977	1	78.5	75.6	109.7	100.2	107.7	128.4	44.1	108.7	82.2	30.8	79.2	81.3	81.4	114.9	130.6	97.4	104.9	121.1	102.5	112.8	118.5	86.5	168.9	134.5	2195.86	5411.42	4090.55	1531.69
[R].LMDIKSR.[L]	1xBiotin [K5]	1	6	P08727	P08727 [366-372]	P08727 1xBiotin [K370]	Keratin, type I cytoskeletal 19 OS=Homo sapiens OX=9606 GN=KRT19 PE=1 SV=4	1	1088.56	1.114	1.423	1.511	0.16	0.51	0.6	0.997888	0.504169	0.668696	1	1	1	79.6	91.8	83.3	88.7	130.7	125.8	54.9	161	77.1	49.7	106.8	89	88.8	57.9	80.7	85.9	132.1	84.8	135.3	120.6	126.6	79.8	147.1	121.9	12260	35955.3	17220.4	11104.2
[R].DLALLKLK.[A]	1xBiotin [K6]	1	5	Q5VT06	Q5VT06 [1379-1386]	Q5VT06 1xBiotin [K1384]	Centrosome-associated protein 350 OS=Homo sapiens OX=9606 GN=CEP350 PE=1 SV=1	1	1139.69	1.209	1.42	1.636	0.27	0.51	0.71	0.996894	0.639582	0.918614	1	1	1	84.2	82.8	81.1	101.8	117.5	132.6	31.2	145	88.5	123.1	86.9	26.7	68.2	108.5	85.1	58.1	112.4	107	112.2	137.5	123.5	102.7	144	139.3	1680.4	7794.89	4757.82	6619.94
[R].KAGNFYVPAEPK.[L]	1xBiotin [K1]	1	3	P18124	P18124 [77-88]	P18124 1xBiotin [K77]	60S ribosomal protein L7 OS=Homo sapiens OX=9606 GN=RPL7 PE=1 SV=1	1	1546.77	1.218	1.416	1.442	0.28	0.5	0.53	0.999995	0.9928	0.392253	1	1	1	75.3	97.5	80.8	91.7	138.1	116.5	98.3	71.1	72.2	119.5	92.6	93.5	56.2	89.4	77.4	94.6	87.9	54.9	66	185.7	132.3	87.1	209.6	111.6	3287.19	2378.28	2412.59	3995.48
[K].KVEAQLQELQVK.[F]	1xBiotin [K1]	1	6	P35579	P35579 [1249-1260]	P35579 1xBiotin [K1249]	Myosin-9 OS=Homo sapiens OX=9606 GN=MYH9 PE=1 SV=4	1	1638.89	1.281	1.413	1.563	0.36	0.5	0.64	0.543484	0.181024	0.206911	1	0.629756	0.819661	83.7	94	71.2	107.2	132.8	111.2	64.9	76	80.5	85.4	79.3	135.7	64.6	58.6	68.1	97.3	107.2	95.5	120.6	120.5	248.6	91.6	104.5	101	18108.9	21209.9	22467.3	23830.9
[R].KTYTLTDYLK.[N]	1xBiotin [K1]	1	2	P27487	P27487 [41-50]	P27487 1xBiotin [K41]	Dipeptidyl peptidase 4 OS=Homo sapiens OX=9606 GN=DPP4 PE=1 SV=2	1	1471.75	1.623	1.41	1.585	0.7	0.5	0.66	0.620634	0.946379	0.0742559	1	1	0.367154	75.4	88	73.5	122.4	124.2	116.5	68.6	40.1	97.1	112.5	77.5	80.1	75.2	40	66.9	111.3	113.3	84	112.9	88.3	149.1	104.5	106	272.7	2959.56	1731.05	4191.56	4852.76
[R].KSDLHPTLPAGR.[Y]	1xBiotin [K1]	3	1	Q9NV96	Q9NV96 [279-290]	Q9NV96 1xBiotin [K279]	Cell cycle control protein 50A OS=Homo sapiens OX=9606 GN=TMEM30A PE=1 SV=1	1	1517.79	1.719	1.409	1.198	0.78	0.49	0.26	0.885293	0.477408	0.999977	1	1	1	73.9	83.6	89.9	127.1	117.8	107.7	56.1	76.3	90.8	15.2	124.8	86.3	81.7	121.8	92.9	73.8	159	131.2	121.6	123.3	117.4	70.3	146.5	111.2	10438.8	14206.5	16897.4	2822.05
[R].LVKGPDPSSPAFR.[I]	1xBiotin [K3]	1	23	P07996	P07996 [48-60]	P07996 1xBiotin [K50]	Thrombospondin-1 OS=Homo sapiens OX=9606 GN=THBS1 PE=1 SV=2	1	1596.82	1.226	1.407	1.614	0.29	0.49	0.69	0.47646	0.849627	0.380861	1	1	1	88.7	80.7	79.8	108.7	113.5	128.7	58.9	83.6	105.4	70.7	105.4	76.1	65.4	75.2	108.9	85.8	102.5	180.1	107	111.2	95.8	121.4	135.6	111.1	13179.3	18708.8	23575.7	15827.1
[K].YKFLLFGIQDGK.[R]	1xBiotin [K2]	3	2	P22105-1	P22105-1 [1641-1652]	P22105-1 1xBiotin [K1642]	Isoform 3 of Tenascin-X OS=Homo sapiens OX=9606 GN=TNXB	1	1654.87	1.921	1.398	1.226	0.94	0.48	0.29	0.25333	0.816849	0.790764	0.949987	1	1	65.5	86.7	90.2	125.8	121.2	110.6	41.8	61.7	84.8	82.7	74	81.7	87.6	43.4	85.1	200.7	96.3	118.6	169.9	88.5	114.3	211.4	53.2	104.3	1428.17	2109.73	2897.6	2826.58
[K].HISAENTKGSQTSR.[S]	1xBiotin [K8]	1	2	Q9UNN8	Q9UNN8 [193-206]	Q9UNN8 1xBiotin [K200]	Endothelial protein C receptor OS=Homo sapiens OX=9606 GN=PROCR PE=1 SV=1	1	1741.83	1.44	1.391	1.567	0.53	0.48	0.65	0.995226	0.764845	0.999654	1	1	1	91.3	76.8	75.4	131.5	106.8	118.2	112	80.4	93.2	78.4	23.3	111.1	77	191.2	46.4	149.2	78.2	134.3	86.9	109.1	112.4	59.3	136.9	120.7	9005.17	6459.06	7493.48	6302.45
[R].NFNSAKDMK.[K]	1xBiotin [K6]	4	11	O00339	O00339 [711-719]	O00339 1xBiotin [K716]	Matrilin-2 OS=Homo sapiens OX=9606 GN=MATN2 PE=1 SV=4	1	1280.58	0.77	1.391	1.191	-0.38	0.48	0.25	0.99996	0.906283	0.998719	1	1	1	86.7	76.9	119.9	66.7	107	142.8	56.2	87.1	100.5	46.2	77.3	136.1	66.6	122.9	120.5	67	61.9	144	120.8	107.5	107	57.4	143.5	177.5	16164.3	25027.4	28889.1	13263.3
[R].YLEKFYGLEINK.[L]	1xBiotin [K4]	1	4	P39900	P39900 [36-47]	P39900 1xBiotin [K39]	Macrophage metalloelastase OS=Homo sapiens OX=9606 GN=MMP12 PE=1 SV=1	1	1742.88	0.864	1.39	1.101	-0.21	0.48	0.14	0.999932	0.700682	0.999956	1	1	1	87.2	89.9	106	75.4	125	116.6	72.7	69.8	95.9	100.1	75	40.4	88.4	98.5	85	218.7	46	62.9	236.2	77.3	104.2	177.3	54.5	97.3	2798.15	2685.05	3688.57	3851.38
[K].IDDKGMAPALR.[H]	1xBiotin [K4]	2	26	P05121	P05121 [89-99]	P05121 1xBiotin [K92]	Plasminogen activator inhibitor 1 OS=Homo sapiens OX=9606 GN=SERPINE1 PE=1 SV=1	1	1412.7	1.198	1.39	1.827	0.26	0.48	0.87	0.995123	0.73277	0.258957	1	1	0.969031	89.3	88.4	68.1	107	122.8	124.4	107.1	74.1	94.9	93.9	111.3	70.8	71.9	72.3	86.4	121.9	71.3	113.7	130.5	137.7	87.4	90.3	132.4	132.1	43315.9	29996.1	38395.2	37973.3
[R].LKVGLQVVAVK.[A]	1xBiotin [K2]	1	7	P10809	P10809 [291-301]	P10809 1xBiotin [K292]	60 kDa heat shock protein, mitochondrial OS=Homo sapiens OX=9606 GN=HSPD1 PE=1 SV=2	1	1379.84	1.652	1.389	1.275	0.72	0.47	0.35	0.147287	0.912024	0.854085	0.625507	1	1	62	87.3	99.8	102.5	121.2	127.3	62.3	13.2	83.9	64.1	90.9	87.6	100.2	111.3	74.8	98.6	102.9	126.6	95.8	128.4	121.7	117.5	192.2	127.8	7918.67	1678.33	10675.1	8156.17
[R].WTSPDYTMWKNVGK.[E]	1xBiotin [K10]	2	3	Q9NT68	Q9NT68 [2437-2450]	Q9NT68 1xBiotin [K2446]	Teneurin-2 OS=Homo sapiens OX=9606 GN=TENM2 PE=1 SV=3	1	1938.89	1.306	1.388	1.263	0.39	0.47	0.34	0.909816	0.972724	0.995468	1	1	1	87.1	92.9	78.3	113.8	129	98.9	52.3	103	75.2	58.4	80.2	93	176.2	67.6	65.2	171.4	94.7	98.2	262.6	41.1	111.3	128.2	85.4	36	2062.36	4060.84	2963.59	2302.98
[K].LPVPSKQHGQIR.[G]	1xBiotin [K6]	2	3	P10586	P10586 [731-742]	P10586 1xBiotin [K736]	Receptor-type tyrosine-protein phosphatase F OS=Homo sapiens OX=9606 GN=PTPRF PE=1 SV=2	1	1585.86	0.942	1.388	2.362	-0.09	0.47	1.24	0.98995	0.616753	0.467552	1	1	1	83.1	91.6	65.4	78.4	127.1	154.4	48	87.3	120.7	16.5	98.9	96.2	68.7	26.9	96.4	82.3	80.5	180.4	89.1	135.6	133.5	88.6	162.2	188.2	6360.32	11579.1	16002.5	2182.97
[K].IKIIAPPER.[K]	1xBiotin [K2]	8	23	P60709	P60709 [327-335]	P60709 1xBiotin [K328]	Actin, cytoplasmic 1 OS=Homo sapiens OX=9606 GN=ACTB PE=1 SV=1	1	1262.73	0.995	1.386	1.373	-0.01	0.47	0.46	0.996296	0.552958	0.280046	1	1	1	92.4	95.5	79.1	91.9	132.4	108.6	94.6	83.1	89.2	73.1	99.7	92.3	65.6	76.7	76.5	84.9	88.8	124.1	96.9	152.8	128	74.6	194.2	105	82860.2	72769.5	78144.5	63982
[K].YTQELTLKR.[Q]	1xBiotin [K8]	8	21	P23229	P23229 [587-595]	P23229 1xBiotin [K594]	Integrin alpha-6 OS=Homo sapiens OX=9606 GN=ITGA6 PE=1 SV=5	1	1377.72	0.899	1.386	1.428	-0.15	0.47	0.51	0.99997	0.717665	0.514567	1	1	1	93.6	89.4	86	84.2	124	122.8	67.1	137.1	91.2	93.3	87.1	75	83.8	74.3	92.4	82	77.6	146.1	126.5	120.7	90.8	119.6	137.4	98.1	18738.5	38310.4	25488.8	26060.7
[K].EITIHTKLPAK.[D]	1xBiotin [K7]	2	55	O00592	O00592 [412-422]	O00592 1xBiotin [K418]	Podocalyxin OS=Homo sapiens OX=9606 GN=PODXL PE=1 SV=2	1	1476.82	1.605	1.384	1.24	0.68	0.47	0.31	0.898939	0.821664	0.809713	1	1	1	83.9	93.2	71	134.7	129	88.1	102.6	77.3	82.3	92.5	91.4	87.4	61.9	69.6	101.2	73.6	132.1	136.7	90.6	126.5	149.3	71	86.4	167.6	263625	198683	211560	237899
[R].DKLRPIPITASVEIQEPSSR.[R]	1xBiotin [K2]	8	1	P23229	P23229 [614-633]	P23229 1xBiotin [K615]	Integrin alpha-6 OS=Homo sapiens OX=9606 GN=ITGA6 PE=1 SV=5	1	2462.31	1.078	1.38	0.794	0.11	0.46	-0.33	1	0.940414	1	1	1	1	109.7	77.3	104.8	118.3	106.7	83.3	129.4	101.1	114.3	64.7	83.3	80.5	50.4	113.7	109.2	123.2	101.6	126.5	181	111.1	48.3	86.7	114.8	60.3	4164.17	3254.41	3679.78	2082.23
[K].FKSIEEVIK.[R]	1xBiotin [K2]	1	2	P47895	P47895 [422-430]	P47895 1xBiotin [K423]	Aldehyde dehydrogenase family 1 member A3 OS=Homo sapiens OX=9606 GN=ALDH1A3 PE=1 SV=2	1	1318.71	1.629	1.38	1.337	0.7	0.46	0.42	0.863997	0.551044	0.938649	1	1	1	89.5	76.6	78.1	145.7	105.7	104.4	82.3	76.5	86	86	70.4	37.3	141.8	71.8	45.3	83.6	134	162.6	152.4	97.1	97.1	57.5	96	222.1	3853.72	3584.91	4027.2	4028.97
[K].ENPGSWFSEFKR.[G]	1xBiotin [K11]	1	2	P20908	P20908 [1698-1709]	P20908 1xBiotin [K1708]	Collagen alpha-1(V) chain OS=Homo sapiens OX=9606 GN=COL5A1 PE=1 SV=3	1	1709.77	1.49	1.377	0.691	0.57	0.46	-0.53	0.688517	0.825209	1	1	1	1	84	91.1	103	125.2	125.5	71.2	79.4	55.7	105.1	91	82.2	86.1	121	97.4	65.1	118.3	100.6	124	118.6	122.9	114.2	190.7	67.3	60.6	2483.19	1743.31	3286.33	2844.88
[R].MVTSESKNVK.[L]	1xBiotin [K7]	1	3	P02786	P02786 [365-374]	P02786 1xBiotin [K371]	Transferrin receptor protein 1 OS=Homo sapiens OX=9606 GN=TFRC PE=1 SV=2	1	1348.66	2.137	1.374	2.594	1.1	0.46	1.38	0.966168	0.999976	0.999116	1	1	1	49.2	108.3	52.5	105.1	148.9	136.1	45.9	59.7	55.1	55.6	125	121.5	34.1	58.8	162.1	33.9	117.8	170.6	32	167	219	25.7	163.5	152.6	3188.09	4145.72	3831.3	3864.21
[K].GLVLGPIHKNQK.[D]	1xBiotin [K]	4	8	P08195	P08195 [258-269]	P08195 1xBiotin [K]	4F2 cell-surface antigen heavy chain OS=Homo sapiens OX=9606 GN=SLC3A2 PE=1 SV=3	1	1529.86	1.284	1.373	1.261	0.36	0.46	0.33	0.880896	0.92636	0.386193	1	1	1	82.9	91.2	85.9	106.4	125.2	108.3	91.3	81.2	81.3	59.7	143.5	89.5	46.2	102.7	84.3	97.6	122.4	104.4	93.2	126.8	122.9	100.1	146.6	106.3	15684.6	13945.8	13970.6	10262
[K].KLNVTEQEK.[I]	1xBiotin [K1]	1	14	P06733	P06733 [81-89]	P06733 1xBiotin [K81]	Alpha-enolase OS=Homo sapiens OX=9606 GN=ENO1 PE=1 SV=2	1	1314.67	1.723	1.371	1.164	0.79	0.46	0.22	0.131852	0.885589	0.41786	0.590677	1	1	67.7	101.7	80.7	116.6	139.5	93.9	65.8	93.3	58.8	80.7	99	112.7	54.1	78.5	85.1	113.4	104.6	160.7	88.5	135.7	142.4	85.2	150.3	91.3	14307.9	20290.8	12786.3	17553.4
[-].MAAYKLVLIR.[H]	1xBiotin [K5]; 1xMet-loss+Acetyl [N-Term]	2	2	Q8N0Y7	Q8N0Y7 [1-10]	Q8N0Y7 1xBiotin [K5]; 1xMet-loss+Acetyl [N-Term]	Probable phosphoglycerate mutase 4 OS=Homo sapiens OX=9606 GN=PGAM4 PE=3 SV=1	1	1314.76	0.995	1.366	0.893	-0.01	0.45	-0.16	0.993451	0.332079	0.996132	1	0.972206	1	93.1	85.2	112.4	92.6	116.4	100.3	48.9	96.4	96.3	98.7	88.2	53.7	123.2	64.9	116.2	60.2	95.8	118.2	114.3	120.4	171.5	98.3	103.7	131	1533.08	3019.71	3016.88	3093.93
[R].IPKEQGVLSFWR.[G]	1xBiotin [K3]	2	1	P12236	P12236 [61-72]	P12236 1xBiotin [K63]	ADP/ATP translocase 3 OS=Homo sapiens OX=9606 GN=SLC25A6 PE=1 SV=4	1	1685.88	1.798	1.365	1.013	0.85	0.45	0.02	0.823246	0.980128	0.999996	1	1	1	69.2	94.4	90.9	124.4	128.9	92.1	69.8	87.7	63.8	71.6	109.8	95.3	99.9	91.7	87.7	162.7	125.5	61.5	217.6	130.1	51.3	112.1	92.9	69	1971.41	2476.22	1801.81	2023.04
[K].VHLVGIDIFTGKK.[Y]	1xBiotin [K12]	4	10	Q6IS14	Q6IS14 [56-68]	Q6IS14 1xBiotin [K67]	Eukaryotic translation initiation factor 5A-1-like OS=Homo sapiens OX=9606 GN=EIF5AL1 PE=2 SV=2	1	1652.92	0.314	1.364	0.632	-1.67	0.45	-0.66	0.777849	0.994667	0.75123	1	1	1	145.6	77.3	138.5	45.7	105.4	87.5	218.9	66.8	103.4	183	23.9	54.9	241.9	94.3	98.3	179.8	32.5	17.7	147.4	62.4	74.8	119.6	18.6	62.1	36174	11032.1	17076.2	30241.1
[K].KDLLETIETQK.[K]	1xBiotin [K1]	1	1	Q96CN9	Q96CN9 [15-25]	Q96CN9 1xBiotin [K15]	GRIP and coiled-coil domain-containing protein 1 OS=Homo sapiens OX=9606 GN=GCC1 PE=1 SV=1	1	1543.8	0.722	1.349	1.089	-0.47	0.43	0.12	0.984103	0.999777	0.999953	1	1	1	111.1	74.2	112.2	80.2	100.1	122.2	101.1	131.3	97.7	67.5	107.1	67.4	140.3	91.3	102.2	73	189.6	54.4	91.1	92.2	72.3	73.1	137	111.3	2961.93	3844.57	2860.22	1978.26
[R].MQKEITALAPSTMK.[I]	1xBiotin [K3]; 1xOxidation [M13]	7	4	P60709	P60709 [313-326]	P60709 1xBiotin [K315]	Actin, cytoplasmic 1 OS=Homo sapiens OX=9606 GN=ACTB PE=1 SV=1	1	1790.88	1.641	1.344	1.026	0.71	0.43	0.04	0.0504374	0.223292	0.979745	0.270418	0.734222	1	77.5	93.2	87.4	127.1	125.2	89.7	47.4	72.6	76.6	105.1	86.3	87.3	81.9	92.6	70.2	99.9	119.1	134.2	218.8	117.3	113.2	84	82.4	111.3	1793.95	2743.43	2897.48	3975.31
[R].KSQLVYQSR.[R]	1xBiotin [K1]	1	1	Q08380	Q08380 [427-435]	Q08380 1xBiotin [K427]	Galectin-3-binding protein OS=Homo sapiens OX=9606 GN=LGALS3BP PE=1 SV=1	1	1334.69	0.676	1.342	1.574	-0.56	0.42	0.65	0.90676	0.425689	0.991794	1	1	1	122	85	76.3	82.5	114.1	120	94.6	126	120.9	46.6	84.3	96	75.6	75.2	122.5	56.3	81.8	143.8	133.5	111.5	113.1	69.9	129.3	118.9	11796.2	15707.9	15078.1	5812.74
[R].DGCGCCKVCAK.[Q]	1xBiotin [K7]; 4xCarbamidomethyl [C3; C5; C6; C9]	1	25	O00622	O00622 [48-58]	O00622 1xBiotin [K54]	CCN family member 1 OS=Homo sapiens OX=9606 GN=CCN1 PE=1 SV=1	1	1540.58	0.903	1.342	1.196	-0.15	0.42	0.26	0.999763	0.853943	0.948038	1	1	1	72.7	102.6	100.8	65.7	137.7	120.6	70.8	92.3	75.6	86	106.6	106.9	74.4	104.8	110.9	63.7	68.3	96.6	80.2	170.8	143.1	82.4	125.3	141.4	20903.8	27252.9	22335.2	25389.6
[K].ELALVKR.[L]	1xBiotin [K6]	1	3	P20645	P20645 [45-51]	P20645 1xBiotin [K50]	Cation-dependent mannose-6-phosphate receptor OS=Homo sapiens OX=9606 GN=M6PR PE=1 SV=1	1	1054.61	1.722	1.339	1.406	0.78	0.42	0.49	0.966032	0.891655	0.955917	1	1	1	61.4	90.7	91.7	105.8	121.5	128.9	61.1	58.5	128	90.3	149.4	40.6	67.9	91.2	111	105.2	75.5	120.2	120.9	143.4	85	128.3	139.9	83.8	4719.63	4514.18	9886.32	6969.61
[K].AGLQVYNKCWK.[F]	1xBiotin [K8]; 1xCarbamidomethyl [C9]	2	13	P13987	P13987 [56-66]	P13987 1xBiotin [K63]	CD59 glycoprotein OS=Homo sapiens OX=9606 GN=CD59 PE=1 SV=1	1	1592.77	0.547	1.339	0.874	-0.87	0.42	-0.2	0.642924	0.772224	0.999917	1	1	1	158.5	67.6	104.9	86.8	90.5	91.7	177.1	94.7	149.3	63.7	57.7	85.6	98.9	101.5	96.5	132.4	81.3	81.7	85.3	70.7	126.8	68.2	86.4	142.3	21023.7	11239.1	17727.7	7560.79
[R].SSKGQIIGNFQAFDEDTGLPAHAR.[Y]	1xBiotin [K3]	1	1	Q14126	Q14126 [404-427]	Q14126 1xBiotin [K406]	Desmoglein-2 OS=Homo sapiens OX=9606 GN=DSG2 PE=1 SV=2	1	2785.34	1.405	1.339	0.47	0.49	0.42	-1.09	0.497472	0.939077	0.979514	1	1	1	88.6	89.8	120.4	124.4	120.2	56.6	78.3	57.3	82.6	102.8	60	79.4	116	57.7	106.4	251.5	110	99.4	142.7	87.7	106.3	173.8	38	50	2952.71	2161.86	3116.36	3877.84
[K].ESKGSPVFLPR.[K]	1xBiotin [K3]	3	1	Q9NYV4	Q9NYV4 [419-429]	Q9NYV4 1xBiotin [K421]	Cyclin-dependent kinase 12 OS=Homo sapiens OX=9606 GN=CDK12 PE=1 SV=2	1	1442.75	0.889	1.338	0.524	-0.17	0.42	-0.93	1	0.999238	0.604065	1	1	1	115.5	62.5	154.7	102.7	83.6	81.1	56.2	107.3	132.2	58.1	204.4	52.9	143.8	117.1	155.7	44.1	182.6	95.5	67	77.7	81.9	75.3	77	71.1	3634.12	6936.28	8541.19	3755.04
[R].TYNTKVYK.[M]	1xBiotin [K5]	1	28	Q9Y4K0	Q9Y4K0 [241-248]	Q9Y4K0 1xBiotin [K245]	Lysyl oxidase homolog 2 OS=Homo sapiens OX=9606 GN=LOXL2 PE=1 SV=1	1	1242.62	1.239	1.337	1.28	0.31	0.42	0.36	0.985355	0.258155	0.96087	1	0.803331	1	78.5	80.5	103.6	97.2	107.6	132.7	49.5	70.3	100.4	53.3	78.1	72.1	56.5	121.4	92.9	70.4	87.1	105.2	96.4	307.1	93.9	78.2	148.5	118.9	20835.3	29604.6	42261.5	22424.4
[R].SGKPAELLKMFGIDR.[D]	1xBiotin [K]	2	14	P29401	P29401 [595-609]	P29401 1xBiotin [K]	Transketolase OS=Homo sapiens OX=9606 GN=TKT PE=1 SV=3	1	1887.98	0.237	1.335	0.218	-2.08	0.42	-2.2	0.676612	0.979361	0.527102	1	1	1	216.5	49.6	177.6	51.2	66.3	38.8	173	106.9	91.2	55.8	24.5	10.5	649.9	87.7	56.3	117.1	25.3	9.7	163.1	17.8	32.7	149.9	9.3	19.2	39760.2	24582.8	20961.4	12835.8
[K].AVGKVIPELNGK.[L]	1xBiotin [K4]	2	23	P04406	P04406 [216-227]	P04406 1xBiotin [K219]	Glyceraldehyde-3-phosphate dehydrogenase OS=Homo sapiens OX=9606 GN=GAPDH PE=1 SV=3	1	1450.81	1.69	1.335	1.164	0.76	0.42	0.22	0.0112218	0.129601	0.812382	0.0741237	0.49973	1	80.6	87.7	82.5	136.2	117.1	96	76.7	69.1	88.7	70.1	84.5	83.5	103.9	78.4	71	187.9	129.5	110.6	107.1	129.7	111.4	91.3	115.7	91	19924.3	17960.5	23062.1	18222.9
[K].AKGETAYLPCK.[F]	1xBiotin [K2]; 1xCarbamidomethyl [C10]	7	16	P78310	P78310 [32-42]	P78310 1xBiotin [K33]	Coxsackievirus and adenovirus receptor OS=Homo sapiens OX=9606 GN=CXADR PE=1 SV=1	1	1463.7	1.035	1.334	1.32	0.05	0.42	0.4	0.998246	0.887492	0.918476	1	1	1	92.8	100.9	75.7	96.1	134.6	99.9	90.5	130.9	52.8	94.6	113.9	98.4	73.8	107.8	72.9	88.2	93.7	95.7	147.2	131.3	102	84.8	123.9	97.5	12249.4	17711.6	7136.88	12802.8
[R].AFSSFKNR.[V]	1xBiotin [K6]	3	2	P19256	P19256 [73-80]	P19256 1xBiotin [K78]	Lymphocyte function-associated antigen 3 OS=Homo sapiens OX=9606 GN=CD58 PE=1 SV=1	1	1182.57	1.196	1.326	1.524	0.26	0.41	0.61	0.987047	0.998537	0.545685	1	1	1	83.1	91.9	80.7	99.4	121.9	123	72.5	87.3	80.2	70.2	88.7	200.6	17.2	98.7	77.8	92.2	95.9	120.6	112.4	150.1	117.5	63.6	118.6	135.8	8504.78	10236.9	9399.7	8230.92
[K].IGVSPPAKQLPGGR.[I]	1xBiotin [K8]	2	46	O95084	O95084 [263-276]	O95084 1xBiotin [K270]	Serine protease 23 OS=Homo sapiens OX=9606 GN=PRSS23 PE=1 SV=1	1	1602.88	1.45	1.324	1.621	0.54	0.41	0.7	0.379678	0.996485	0.306883	1	1	1	68.7	103.5	73	99.6	137.1	118.3	57.3	70.1	69.3	138.9	104.5	95.9	54.3	99.5	73.7	83.5	114.9	100.5	75.1	138.4	178.1	103.9	119.5	122.6	46339.3	56695.8	56049.2	112256
[K].FDLMYAKR.[A]	1xBiotin [K7]	12	2	P68363	P68363 [395-402]	P68363 1xBiotin [K401]	Tubulin alpha-1B chain OS=Homo sapiens OX=9606 GN=TUBA1B PE=1 SV=1	1	1269.61	1.249	1.324	2.588	0.32	0.41	1.37	0.999552	0.989476	0.654679	1	1	1	65.5	94.2	65.2	81.8	124.7	168.7	170	36.7	51.3	156	73.8	29.6	131.7	43.6	51.1	162.3	64.1	49.9	175.8	50.9	97.7	129.9	193.3	132.2	8221.19	1777.28	2482.58	7546.52
[R].LFTKVQQIR.[R]	1xBiotin [K4]	2	24	P21589	P21589 [64-72]	P21589 1xBiotin [K67]	5'-nucleotidase OS=Homo sapiens OX=9606 GN=NT5E PE=1 SV=1	1	1358.76	1.24	1.323	1.729	0.31	0.4	0.79	0.998366	0.926188	0.47333	1	1	1	80.5	87.1	79.6	99.8	115.3	137.6	81.9	79.5	105.6	73.3	118	88.6	79.2	81	93.4	101.5	82.3	103.2	87.2	128.6	117.2	74.3	140	165.2	21921.1	21274.9	28270.2	19617
[K].WTLLQEQKSAK.[S]	1xBiotin [K]	1	24	P08729	P08729 [123-133]	P08729 1xBiotin [K]	Keratin, type II cytoskeletal 7 OS=Homo sapiens OX=9606 GN=KRT7 PE=1 SV=5	1	1557.81	1.467	1.318	1.153	0.55	0.4	0.21	0.497044	0.27309	0.994609	1	0.836182	1	80.1	72.1	109.2	117.5	95	126	56.8	73.8	81.3	66.4	70.3	17.5	100.6	82.9	124.1	272	80.6	108.3	87.5	125.9	85.9	112.9	116	137.2	12794.2	16627	18312.9	14969.4
[R].STCYGGYKR.[G]	1xBiotin [K8]; 1xCarbamidomethyl [C3]	1	7	P35555	P35555 [659-667]	P35555 1xBiotin [K666]	Fibrillin-1 OS=Homo sapiens OX=9606 GN=FBN1 PE=1 SV=4	1	1317.57	0.658	1.317	1.342	-0.6	0.4	0.42	0.824777	0.666822	0.999963	1	1	1	110.9	74.8	103.7	73	98.5	139.1	81	149.6	95	64	96.5	52.3	82.9	88.7	184.2	62.5	57.2	105.8	80.1	191.7	84.3	132.3	72.7	119.1	10815.3	19976.4	12678.3	8551.29
[R].YEAQKLER.[M]	1xBiotin [K5]	7	1	O00154	O00154 [194-201]	O00154 1xBiotin [K198]	Cytosolic acyl coenzyme A thioester hydrolase OS=Homo sapiens OX=9606 GN=ACOT7 PE=1 SV=3	1	1262.62	0.424	1.315	0.857	-1.24	0.4	-0.22	0.859674	0.999909	0.98774	1	1	1	144.5	73.6	120.6	61.3	96.8	103.3	45.2	182.9	139.3	49.6	167.8	71	176.5	116.3	89.8	89	43.4	59.1	35.7	93.4	129.2	46.1	99.7	166.1	2527.31	10231.5	7793.85	2773.64
[R].LKLEPHEGLLLR.[F]	1xBiotin [K2]	4	33	P08195	P08195 [614-625]	P08195 1xBiotin [K615]	4F2 cell-surface antigen heavy chain OS=Homo sapiens OX=9606 GN=SLC3A2 PE=1 SV=3	1	1643.93	2.005	1.315	1.703	1	0.39	0.77	0.14665	0.851177	0.500329	0.625507	1	1	74	82.8	68.8	148.4	108.8	117.2	73.1	73.1	84.2	81.7	58.9	136.3	63.2	68	83.7	104.9	146.5	164.7	119.9	107.4	106.5	68.5	143.6	115.7	61876.6	61875	71322.2	69205.8
[R].CNTPAMGLQKK.[L]	1xBiotin [K]; 1xCarbamidomethyl [C1]	1	8	Q9Y4K0	Q9Y4K0 [424-434]	Q9Y4K0 1xBiotin [K]	Lysyl oxidase homolog 2 OS=Homo sapiens OX=9606 GN=LOXL2 PE=1 SV=1	1	1473.7	2.681	1.31	1.108	1.42	0.39	0.15	0.595884	0.976152	0.922813	1	1	1	51	84.3	103.3	136.6	110.4	114.4	48.4	115.9	33.3	80.1	121.4	53.8	111.9	63	98.1	129.8	65.1	134.1	125.3	87.9	104.9	75.5	108.7	242.9	3331.94	7975.46	2291.87	5510.83
[K].FMKIGVSPPAK.[Q]	1xBiotin [K3]	2	24	O95084	O95084 [260-270]	O95084 1xBiotin [K262]	Serine protease 23 OS=Homo sapiens OX=9606 GN=PRSS23 PE=1 SV=1	1	1400.74	0.74	1.309	1.771	-0.43	0.39	0.82	0.831748	0.559994	0.625961	1	1	1	116.7	80.3	76.3	86.3	105.2	135.2	120.5	114.6	80.8	58.4	110.7	78.9	77.6	75	64.8	86.2	54.6	84.8	215.6	103.3	98.5	60.5	132.7	182.6	32676.6	31085.8	21928.5	15842.5
[R].GPIKFNVWDTAGQEK.[F]	1xBiotin [K4]	1	8	P62826	P62826 [57-71]	P62826 1xBiotin [K60]	GTP-binding nuclear protein Ran OS=Homo sapiens OX=9606 GN=RAN PE=1 SV=3	1	1915.94	0.618	1.307	0.543	-0.69	0.39	-0.88	0.370214	0.999952	0.360432	1	1	1	135.6	69.1	143.3	83.8	90.4	77.8	294.5	80.8	104.8	153.1	53.4	47	254.2	110.7	88.2	64.8	49.1	75.1	103.2	66.5	69.8	58.9	65.6	60.1	22216.8	6099.11	7903.62	11552.3
[K].MKNENADK.[L]	1xBiotin [K2]	2	1	Q76M96	Q76M96 [554-561]	Q76M96 1xBiotin [K555]	Coiled-coil domain-containing protein 80 OS=Homo sapiens OX=9606 GN=CCDC80 PE=1 SV=1	1	1175.52	1.311	1.305	1.754	0.39	0.38	0.81	0.996911	0.997449	0.95762	1	1	1	62.7	94	86.5	82.3	122.7	151.7	64.6	128.2	56	40.2	96.8	121.4	52.7	89.1	113.3	72.7	84.7	139.4	48.5	139.4	126.3	46.1	224.4	156.2	3372.53	6691.48	2924.21	2098.53
[R].QQQKWER.[K]	1xBiotin [K4]	2	10	O95084	O95084 [328-334]	O95084 1xBiotin [K331]	Serine protease 23 OS=Homo sapiens OX=9606 GN=PRSS23 PE=1 SV=1	1	1228.59	1.11	1.295	1.235	0.15	0.37	0.3	0.917372	0.156762	0.841957	1	0.570236	1	77.6	95	97.6	86.1	123.1	120.5	102	73.8	52.2	90.7	86.6	90.4	111.3	81.1	92.8	81.9	78.8	97.1	114.9	188.4	117.1	114.7	114.6	111.7	22411.7	16199.3	11458.9	19923.2
[K].GGVVLKEDALPGQK.[T]	1xBiotin [K6]	2	14	P35613	P35613 [174-187]	P35613 1xBiotin [K179]	Basigin OS=Homo sapiens OX=9606 GN=BSG PE=1 SV=2	1	1636.87	1.607	1.295	1.851	0.68	0.37	0.89	0.598018	0.821004	0.923179	1	1	1	66.2	90.6	76.9	106.4	117.3	142.5	111.6	10.5	70.2	22.6	96.1	113.4	99.5	81.6	75.9	117.4	84	112.8	148.5	124.4	93.1	101.4	151.1	185.8	15194	1433.72	9560.3	3072.27
[K].KTDPSGLSK.[T]	1xBiotin [K1]	3	26	Q13740	Q13740 [423-431]	Q13740 1xBiotin [K423]	CD166 antigen OS=Homo sapiens OX=9606 GN=ALCAM PE=1 SV=2	1	1158.58	1.296	1.291	1.096	0.37	0.37	0.13	0.8321	0.848086	0.962996	1	1	1	74.2	100.3	95.3	96.2	129.5	104.4	66.8	83.7	67.8	134.2	91.7	75.1	86.8	119.4	87.1	109.1	87.9	76.4	130.2	113.7	118.4	86.6	169.5	95.5	156587	196104	158929	314429
[K].KGLTPSQIGVILR.[D]	1xBiotin [K1]	1	18	P62277	P62277 [43-55]	P62277 1xBiotin [K43]	40S ribosomal protein S13 OS=Homo sapiens OX=9606 GN=RPS13 PE=1 SV=2	1	1607.93	0.7	1.287	0.972	-0.52	0.36	-0.04	0.775311	0.999228	0.801819	1	1	1	108	85	112.6	75.6	109.3	109.5	217.9	85.2	88	153.5	32.5	69.2	296.6	91.7	78.3	87.1	61.5	56.5	89	64.7	92.8	98.3	48.1	89.1	23946.8	9359.78	9665.5	16869.9
[R].NLVVIPKSVTPER.[I]	1xBiotin [K7]	1	1	P15121	P15121 [257-269]	P15121 1xBiotin [K263]	Aldo-keto reductase family 1 member B1 OS=Homo sapiens OX=9606 GN=AKR1B1 PE=1 SV=3	1	1677.94	0.719	1.281	1.632	-0.48	0.36	0.71	0.99856	0.982121	1	1	1	1	120.7	85.9	74.6	86.9	110	121.8	132.6	34.8	137.4	94.3	99.7	54.8	80.4	121.6	82	83.6	95.4	128.3	69.2	141.3	120.8	38.8	151.3	133.7	5772.02	1513.94	5981.35	4107.16
[K].KYLLSQSSPAPLTAAEEELR.[Q]	1xBiotin [K1]	3	2	Q12792	Q12792 [136-155]	Q12792 1xBiotin [K136]	Twinfilin-1 OS=Homo sapiens OX=9606 GN=TWF1 PE=1 SV=3	1	2429.24	0.827	1.279	1.76	-0.27	0.36	0.82	1	0.99518	0.999996	1	1	1	87.4	104.6	73.1	72.3	133.8	128.7	81.9	73.2	57	87.9	85.9	87.7	249.3	51.5	61.3	119.1	60.6	42.7	285.7	112.1	42.4	125.3	68.7	107.8	2913.9	2606.24	2030.04	3130.56
[R].IDFSKLTSLNVK.[Y]	1xBiotin [K5]	10	3	P26599	P26599 [255-266]	P26599 1xBiotin [K259]	Polypyrimidine tract-binding protein 1 OS=Homo sapiens OX=9606 GN=PTBP1 PE=1 SV=1	1	1590.86	1.053	1.278	1.078	0.07	0.35	0.11	0.977341	0.960213	0.995769	1	1	1	79.8	91.7	109.4	84	117.2	118	75.6	83	76.7	56.5	88.2	110.7	105.2	112	67.1	186.1	80.7	64.1	193.7	55.8	112.7	135.1	113.5	83.2	2672.03	2931.91	2709.4	1996.73
[R].GELAIKDANAK.[L]	1xBiotin [K6]	2	1	P05787	P05787 [342-352]	P05787 1xBiotin [K347]	Keratin, type II cytoskeletal 8 OS=Homo sapiens OX=9606 GN=KRT8 PE=1 SV=7	1	1355.7	1.695	1.271	2.551	0.76	0.35	1.35	0.227411	0.35566	0.0987642	0.882539	1	0.454656	68.5	88.1	60.6	116.2	112	154.5	78.2	68.2	33.5	90.5	38.8	87.7	36.2	102.5	60.3	131.3	115.6	107.4	98.5	111.5	190.2	153.8	140.5	155.4	3591.02	3132.92	1536.97	4155.42
[K].AKSETVLTCATGR.[A]	1xBiotin [K2]; 1xCarbamidomethyl [C9]	2	26	P26006	P26006 [896-908]	P26006 1xBiotin [K897]	Integrin alpha-3 OS=Homo sapiens OX=9606 GN=ITGA3 PE=1 SV=5	1	1619.79	0.769	1.271	1.249	-0.38	0.35	0.32	0.807221	0.90257	0.999843	1	1	1	97.5	85.6	103.7	75	108.8	129.5	97.8	121.3	87.6	93.9	85.9	85.5	99	104.1	107.1	67.7	75.2	98.8	80.4	142.4	109.2	66.1	148.1	130	34895.1	43248.7	31229	33498.9
[K].CNLLAEKQYGFCK.[A]	1xBiotin [K7]; 2xCarbamidomethyl [C1; C12]	1	6	P02765	P02765 [219-231]	P02765 1xBiotin [K225]	Alpha-2-HS-glycoprotein OS=Homo sapiens OX=9606 GN=AHSG PE=1 SV=2	1	1856.85	0.788	1.265	2.51	-0.34	0.34	1.33	0.999649	0.889808	0.744367	1	1	1	90.9	108.7	54.5	71.6	137.4	136.9	55.9	86.1	82.3	124.3	98.4	41.5	137.9	42.7	49.4	176.5	50.4	64.8	180	88.9	124.5	124	67.1	205.4	2133.59	3287.57	3140.85	4741.74
[R].FTYAGCLSVKK.[Y]	1xBiotin [K]; 1xCarbamidomethyl [C6]	1	32	O00622	O00622 [298-308]	O00622 1xBiotin [K]	CCN family member 1 OS=Homo sapiens OX=9606 GN=CCN1 PE=1 SV=1	1	1499.74	0.933	1.26	1.376	-0.1	0.33	0.46	0.985579	0.959081	0.963522	1	1	1	86.7	99.2	87.7	80.8	125	120.6	94.3	64.6	86.1	101.1	76.4	98.6	130.9	82	87.1	80.3	74	132.5	78	132	124.2	83.6	154.5	119.9	55738.1	38196.7	50915.5	59739
[R].STCYGGIKK.[G]	1xBiotin [K]; 1xCarbamidomethyl [C3]	2	5	P35556	P35556 [704-712]	P35556 1xBiotin [K]	Fibrillin-2 OS=Homo sapiens OX=9606 GN=FBN2 PE=1 SV=3	1	1239.59	3.592	1.257	1.178	1.84	0.33	0.24	0.556645	0.999834	0.997485	1	1	1	27.3	116.2	97.5	98	146	114.9	19	83.7	27.2	72.9	115.8	141.3	28.7	97.2	197	42.7	97.7	156.5	80.4	151.3	145.6	55.7	172.7	114.6	1478.99	6511.63	2116.89	5669.81
[R].EFTKATNVR.[L]	1xBiotin [K4]	2	6	O15230	O15230 [252-260]	O15230 1xBiotin [K255]	Laminin subunit alpha-5 OS=Homo sapiens OX=9606 GN=LAMA5 PE=1 SV=8	1	1291.65	1.779	1.22	1.481	0.83	0.29	0.57	1	0.999972	0.999984	1	1	1	74.2	89.2	78.9	132.1	108.8	116.8	418.7	28.3	32.4	262.4	18.7	38.9	196.1	27.5	34.4	162.1	57.7	38	159.3	39.9	47.5	150.6	51	36.4	150161	10164	11623.7	94099.1
[R].TKTEISEMNR.[N]	1xBiotin [K2]; 1xOxidation [M8]	2	24	P05787	P05787 [303-312]	P05787 1xBiotin [K304]	Keratin, type II cytoskeletal 8 OS=Homo sapiens OX=9606 GN=KRT8 PE=1 SV=7	1	1450.67	2.993	1.217	2.161	1.58	0.28	1.11	0.0418288	0.945358	0.127309	0.232958	1	0.555415	53.1	81.2	65.9	158.8	98.8	142.3	56	66.7	51.7	54.5	98.4	85.7	49.5	79.5	69.5	181.2	100.3	167.6	59.5	148.8	104.3	89.4	150.2	187.3	27622.9	32926.3	25506.6	26892.1
[K].LMSFLKLEK.[G]	1xBiotin [K6]; 1xOxidation [M2]	2	3	Q76M96	Q76M96 [222-230]	Q76M96 1xBiotin [K227]	Coiled-coil domain-containing protein 80 OS=Homo sapiens OX=9606 GN=CCDC80 PE=1 SV=1	1	1350.72	0.698	1.215	0.806	-0.52	0.28	-0.31	0.952464	0.648448	0.942796	1	1	1	124.1	96.1	97.7	86.7	116.7	78.7	122.4	128.8	83	106.6	61.1	94.7	96.4	75.3	124.2	73.2	85.4	108.9	108.6	115.1	161.9	44.1	77.6	132.7	3970.64	4178.71	2693.64	3457.92
[K].LDVQFSGLTKGDAVR.[D]	1xBiotin [K10]	2	34	P21333	P21333 [907-921]	P21333 1xBiotin [K916]	Filamin-A OS=Homo sapiens OX=9606 GN=FLNA PE=1 SV=4	1	1831.94	0.575	1.215	0.633	-0.8	0.28	-0.66	0.70612	0.999637	0.975377	1	1	1	133.6	67.5	147	76.8	82	93	131.8	101.9	126	160.5	63.6	61.5	138.6	84.1	143.4	93.6	72.4	49	77.3	53.1	110.2	87.7	41.3	204	66600.4	51495.4	63646.8	81096.2
[R].GTIGPGKYGYGK.[A]	1xBiotin [K7]	2	12	Q6ZMP0	Q6ZMP0 [160-171]	Q6ZMP0 1xBiotin [K166]	Thrombospondin type-1 domain-containing protein 4 OS=Homo sapiens OX=9606 GN=THSD4 PE=2 SV=2	1	1423.7	2.753	1.212	2.16	1.46	0.28	1.11	0.136618	0.517833	0.345777	0.601932	1	1	36.3	102.9	74.7	99.9	124.8	161.4	18.8	38.1	81	32.4	108.9	108.1	57.4	78.5	91.4	104.9	95	105.9	130.6	131	144.3	125.9	169.5	178.3	1889.9	3820.86	8119.81	3249.02
[K].YKMHLYGLHEGQR.[V]	1xBiotin [K2]	3	10	P22105-1	P22105-1 [1436-1448]; [3014-3026]; [3228-3240]	P22105-1 1xBiotin [K1437]; 1xBiotin [K3015]; 1xBiotin [K3229]	Isoform 3 of Tenascin-X OS=Homo sapiens OX=9606 GN=TNXB	1	1857.89	1.479	1.209	0.968	0.56	0.27	-0.05	0.885364	0.710921	0.999998	1	1	1	94.2	87.9	87.5	139.4	106.3	84.7	61.8	100.5	120.9	116.4	33.8	93.8	93.3	78.4	94	158.4	83.8	148.6	113.4	113.5	104.5	64	90.2	130.9	15056.6	24455.7	29429.2	28340.2
[K].EVYELLDSPGKVLLQSK.[D]	1xBiotin [K]	2	2	P22234	P22234 [20-36]	P22234 1xBiotin [K]	Multifunctional protein ADE2 OS=Homo sapiens OX=9606 GN=PAICS PE=1 SV=3	1	2144.13	0.884	1.206	0.791	-0.18	0.27	-0.34	0.972008	0.989432	0.874694	1	1	1	120	78.5	112.1	106.1	94.6	88.7	359.8	47	97.3	37.7	63.7	71.3	289.8	55.8	90.9	86	88.9	71.9	76.7	93.5	57.2	99.4	41.1	71.9	14751.6	1926.14	3989.99	1546.02
[K].TIAPALVSKK.[L]	1xBiotin [K]	1	2	P06733	P06733 [72-81]	P06733 1xBiotin [K]	Alpha-enolase OS=Homo sapiens OX=9606 GN=ENO1 PE=1 SV=2	1	1253.73	0.729	1.2	1.113	-0.46	0.26	0.15	0.910287	0.997721	0.980904	1	1	1	127.7	89.2	86.5	93.1	107.1	96.3	159.9	128.9	100	90.1	129.8	71.3	48.3	87.3	93.1	75.1	94	147.3	108.1	118.8	87	65.9	97.2	97.9	24622.7	19849.5	15402.4	13869.2
[K].SLTGAKDLTK.[N]	1xBiotin [K6]	1	3	Q9P273	Q9P273 [1243-1252]	Q9P273 1xBiotin [K1248]	Teneurin-3 OS=Homo sapiens OX=9606 GN=TENM3 PE=1 SV=3	1	1259.67	1.632	1.197	1.121	0.71	0.26	0.17	0.985745	0.64202	0.988103	1	1	1	72.6	96.7	92.6	118.4	115.8	103.9	74.2	71.9	84.2	13.7	147.2	98.9	58.2	94.8	95.9	76.6	122.7	121.1	159	118.5	101.9	63.5	191.3	106.3	10567.5	10235.5	11988.2	1948.21
[K].VIPELNGKLTGMAFR.[V]	1xBiotin [K8]; 1xOxidation [M12]	2	14	P04406	P04406 [220-234]	P04406 1xBiotin [K227]	Glyceraldehyde-3-phosphate dehydrogenase OS=Homo sapiens OX=9606 GN=GAPDH PE=1 SV=3	1	1887.98	1.666	1.193	2.638	0.74	0.25	1.4	0.999762	0.922889	0.999972	1	1	1	41	130.5	56.2	68.4	155.6	148.3	161.4	16.9	38.7	123.1	142.9	14.2	150.4	33.8	53	152.4	64.5	21.5	248.5	81.9	146.8	194.6	15.5	139.8	31253	3280.26	7494.03	23829
[K].VKDATQITQGPR.[S]	1xBiotin [K2]	3	14	P32004	P32004 [514-525]	P32004 1xBiotin [K515]	Neural cell adhesion molecule L1 OS=Homo sapiens OX=9606 GN=L1CAM PE=1 SV=2	1	1539.79	1.292	1.183	1.164	0.37	0.24	0.22	0.984169	0.956554	0.989909	1	1	1	83.7	94.2	93.6	108.2	111.4	108.9	83.2	83.3	104.5	60.4	96	93.7	93.1	167.9	75.2	78.1	107.7	148.9	68.4	110.8	143.5	53.5	123.5	108.4	18657.5	18696.9	23440.9	13551.1
[K].YYIEKLFER.[Y]	1xBiotin [K5]	1	3	Q9ULF5	Q9ULF5 [62-70]	Q9ULF5 1xBiotin [K66]	Zinc transporter ZIP10 OS=Homo sapiens OX=9606 GN=SLC39A10 PE=1 SV=2	1	1486.74	1.469	1.182	1.199	0.56	0.24	0.26	0.889959	0.998771	0.99998	1	1	1	67.3	113.4	84.8	98.9	134.1	101.6	103.9	44.6	59.1	144.5	41.5	99.6	195.5	74.4	55.4	148.7	86.8	85.6	157.9	52.7	117.7	181.1	89.2	61.7	3543.52	1520.43	2015.33	4927.63
[K].IGHPAPNFKATAVMPDGQFK.[D]	1xBiotin [K9]	1	3	Q06830	Q06830 [8-27]	Q06830 1xBiotin [K16]	Peroxiredoxin-1 OS=Homo sapiens OX=9606 GN=PRDX1 PE=1 SV=1	1	2352.16	1.317	1.182	0.988	0.4	0.24	-0.02	1	0.998438	0.999999	1	1	1	74	91.2	115.5	97.5	107.8	114.1	290.7	34	62.4	177.3	32.9	76.9	155	42.7	97.3	115.1	82.1	66.2	121.6	76.3	90.8	96.1	65.1	117.5	14547.4	1702.36	3121.38	8871.98
[K].LPAKDVYER.[L]	1xBiotin [K4]	2	26	O00592	O00592 [419-427]	O00592 1xBiotin [K422]	Podocalyxin OS=Homo sapiens OX=9606 GN=PODXL PE=1 SV=2	1	1316.67	1.564	1.178	1.398	0.65	0.24	0.48	0.0144375	0.749192	0.0546214	0.0940132	1	0.28822	81.3	96.5	75.7	127.1	113.7	105.8	81.3	65	97.6	85.1	96.5	107.9	75.3	79.2	75.6	127.1	102.3	146.2	118.5	113.6	101.4	105.7	119.2	102.5	72343	57895	86902	75766.9
[R].LTAMKAAFQSQYK.[S]	1xBiotin [K5]	2	14	Q86XP3	Q86XP3 [696-708]	Q86XP3 1xBiotin [K700]	ATP-dependent RNA helicase DDX42 OS=Homo sapiens OX=9606 GN=DDX42 PE=1 SV=1	1	1712.85	0.52	1.174	0.437	-0.94	0.23	-1.19	0.605508	0.999997	0.593053	1	1	1	152.4	73.7	144.8	79.2	86.6	63.3	93.5	140.3	185.2	67.9	182.9	40.4	133.4	85.8	161.4	72.9	100.9	63.5	69.7	100.7	79.7	54.8	58.3	108.5	7837.02	11758.5	15520.1	5690.25
[K].KLVWVPSDK.[S]	1xBiotin [K1]	1	30	P35579	P35579 [30-38]	P35579 1xBiotin [K30]	Myosin-9 OS=Homo sapiens OX=9606 GN=MYH9 PE=1 SV=4	1	1297.7	1.327	1.169	1.289	0.41	0.23	0.37	0.520085	1	0.951855	1	1	1	95.6	81	88.2	126.9	94.7	113.7	64.3	90	96.6	76.2	179.5	74.4	81.5	83.2	82.9	105.6	119.3	135.4	88.5	134.5	89.1	81.4	110.5	106.9	46721.7	65331.3	70160.4	55341.7
[R].KLDFFR.[S]	1xBiotin [K1]	1	3	O15031	O15031 [24-29]	O15031 1xBiotin [K24]	Plexin-B2 OS=Homo sapiens OX=9606 GN=PLXNB2 PE=1 SV=3	1	1051.54	1.511	1.169	3.684	0.6	0.22	1.88	0.131442	0.763067	0.000487722	0.590677	1	0.00525088	71.3	120.4	34.1	107.8	140.7	125.7	42.2	70.1	87.7	96.6	118.2	142.3	33.2	33.5	36	97.9	122.9	105.9	214.1	138.2	118.1	89.3	130.3	123.4	3642.75	6052.99	7578.73	8339.17
[R].IMKAQALR.[D]	1xBiotin [K3]; 1xOxidation [M2]	4	4	P07900; P08238	P07900 [613-620]; P08238 [605-612]	P07900 1xBiotin [K615]; P08238 1xBiotin [K607]	Heat shock protein HSP 90-alpha OS=Homo sapiens OX=9606 GN=HSP90AA1 PE=1 SV=5 Heat shock protein HSP 90-beta OS=Homo sapiens OX=9606 GN=HSP90AB1 PE=1 SV=4	1	1172.63	1.202	1.167	1.273	0.27	0.22	0.35	0.999996	0.999153	0.922274	1	1	1	89.8	102.8	79	108	120	100.5	109.5	91.4	73.7	55.7	163	104.6	55.2	80.3	101.1	36.6	109.8	162.4	126.9	122	87.8	102.1	115.7	102.2	10407.7	8687.21	7011.08	5300.92
[R].MHAPGKGLSQSALPYR.[R]	1xBiotin [K6]; 1xOxidation [M1]	1	7	P62277	P62277 [4-19]	P62277 1xBiotin [K9]	40S ribosomal protein S13 OS=Homo sapiens OX=9606 GN=RPS13 PE=1 SV=2	1	1954.96	1.408	1.166	1.004	0.49	0.22	0.01	0.995578	0.999996	0.782128	1	1	1	54.4	65.1	163.7	76.6	75.9	164.3	51.5	57.3	63.1	89.6	63.8	68.6	172.4	169.3	197.2	80.7	103.9	37.4	80	49.9	111	45.5	173	185.5	2007.18	2233.81	2460.37	3490.38
[R].FFTINPEDGFIKTTKPLDR.[E]	1xBiotin [K12]	2	2	P55287	P55287 [430-448]	P55287 1xBiotin [K441]	Cadherin-11 OS=Homo sapiens OX=9606 GN=CDH11 PE=1 SV=2	1	2465.25	0.738	1.166	1.747	-0.44	0.22	0.81	0.995426	0.950173	0.651988	1	1	1	107.2	102	70.2	79	118.9	122.7	67.7	65.1	78.5	64.4	31.9	64.9	44.4	34.2	57.5	439.4	39.3	50	220.1	39.1	75.1	283.6	67.2	77.6	3548.7	3408.66	4112.95	3376.19
[K].VNQLLKVSLPK.[L]	1xBiotin [K6]	1	2	P68402	P68402 [156-166]	P68402 1xBiotin [K161]	Platelet-activating factor acetylhydrolase IB subunit alpha2 OS=Homo sapiens OX=9606 GN=PAFAH1B2 PE=1 SV=1	1	1464.86	1.659	1.164	0.958	0.73	0.22	-0.06	0.802263	0.849153	0.86748	1	1	1	66	103.4	102.5	109.5	120.4	98.2	42	79.9	63.7	99.8	44.4	103.6	106.2	98.9	59.8	55.5	105.7	139	116.2	119.3	113.5	77.3	94.7	280.8	1613.64	3070.83	2447.13	3833.5
[R].SAPGGGSKVPQK.[K]	1xBiotin [K8]	3	3	P06748	P06748 [143-154]	P06748 1xBiotin [K150]	Nucleophosmin OS=Homo sapiens OX=9606 GN=NPM1 PE=1 SV=2	1	1338.68	3.319	1.162	1.284	1.73	0.22	0.36	0.0020366	0.998264	0.290899	0.0167831	1	1	39	97.6	96.7	129.4	113.3	124.1	38.5	52.2	28	116.9	96.3	88.1	52.2	95.4	106.7	136.5	111.8	127.7	82.5	140.7	111.9	102.2	122.5	189.9	2363.39	3203.43	1720.17	7176.41
[K].STGGAPTFNVTVTKTDK.[T]	1xBiotin [K]	1	4	P07737	P07737 [92-108]	P07737 1xBiotin [K]	Profilin-1 OS=Homo sapiens OX=9606 GN=PFN1 PE=1 SV=2	1	1949.96	1.762	1.154	0.746	0.82	0.21	-0.42	0.560509	0.981757	0.999663	1	1	1	71.2	101.8	105.3	125.5	117.5	78.5	42.7	70.1	95.7	101.1	100.2	95.9	103.7	79.8	113.6	57.4	123.6	166.6	109.4	134.9	115.7	64.9	147.5	77.3	1455.6	2391.17	3264.8	3446.59
[K].YVNDFFNKIVNK.[N]	1xBiotin [K8]	3	2	P08581	P08581 [369-380]	P08581 1xBiotin [K376]	Hepatocyte growth factor receptor OS=Homo sapiens OX=9606 GN=MET PE=1 SV=4	1	1726.86	0.857	1.152	0.912	-0.22	0.2	-0.13	0.999992	0.996263	0.999972	1	1	1	87.4	96.2	120.6	74.9	110.8	110	70.5	58.3	109.5	179.5	77.6	47.3	160.5	97.2	45.1	161.1	60.4	55.8	197.1	71.8	89.3	171.7	58.7	88.7	2676.28	2214.62	4158.81	6815.97
[R].AVKATFNPAQDK.[C]	1xBiotin [K3]	2	4	O00592	O00592 [383-394]	O00592 1xBiotin [K385]	Podocalyxin OS=Homo sapiens OX=9606 GN=PODXL PE=1 SV=2	1	1515.76	1.141	1.148	1.279	0.19	0.2	0.35	0.908505	0.723647	0.998778	1	1	1	86.8	102.8	84.8	99.1	117.9	108.5	64.8	99.1	80.9	91.1	95.7	95.9	118.9	79	77.3	85.2	92.4	122.3	198.7	109.9	90.9	73	123.9	101.1	42097.8	64405.8	52576.2	59202.7
[K].TPKGPSSVEDIK.[A]	1xBiotin [K3]	3	3	P06748	P06748 [237-248]	P06748 1xBiotin [K239]	Nucleophosmin OS=Homo sapiens OX=9606 GN=NPM1 PE=1 SV=2	1	1483.75	3.99	1.146	0.965	2	0.2	-0.05	0.268536	0.993703	0.998854	0.985186	1	1	37.7	78.2	124.3	150.3	89.6	120	34.8	41	95	24.2	85.2	133.6	43	135.4	135.9	99	163.7	204.2	52.1	97.6	113.4	73.3	138	130.6	2498.12	2947.94	6823.21	1738.23
[R].TKTEISEMNR.[N]	1xBiotin [K2]	2	27	P05787	P05787 [303-312]	P05787 1xBiotin [K304]	Keratin, type II cytoskeletal 8 OS=Homo sapiens OX=9606 GN=KRT8 PE=1 SV=7	1	1434.67	0.779	1.138	1.901	-0.36	0.19	0.93	0.998465	0.992193	0.538568	1	1	1	99.4	93.2	77.1	77.5	106.1	146.6	49.4	95.4	97.3	233.2	87.1	89.4	54.4	74	82.7	70.6	74.3	122.7	108.6	101.8	101.7	74	140.6	142.8	43205.5	83361	85086.1	203888
[R].TVKCVNR.[N]	1xBiotin [K3]; 1xCarbamidomethyl [C4]	1	8	Q13641	Q13641 [74-80]	Q13641 1xBiotin [K76]	Trophoblast glycoprotein OS=Homo sapiens OX=9606 GN=TPBG PE=1 SV=1	1	1102.55	1.011	1.137	1.448	0.02	0.19	0.53	1	0.92349	0.359483	1	1	1	92.9	92.2	88.3	93.9	104.8	127.9	71.1	93.6	125.1	112.1	92.9	78.5	68.1	99.9	89	94.6	85.9	99.2	103.7	105.6	118.3	87.4	128.9	146.3	20236.2	26643.8	35615.5	31915.1
[R].ELGFGSAKEAVTGSR.[L]	1xBiotin [K8]	1	2	Q9Y4K0	Q9Y4K0 [366-380]	Q9Y4K0 1xBiotin [K373]	Lysyl oxidase homolog 2 OS=Homo sapiens OX=9606 GN=LOXL2 PE=1 SV=1	1	1734.85	1.501	1.13	0.925	0.59	0.18	-0.11	0.718772	0.996201	0.999999	1	1	1	63	89.1	131.2	94.6	100.6	121.3	44.7	61	116.3	109.8	84.2	86.3	133.4	91.9	127.1	142	82.7	91.6	123.8	97.4	43.8	117.5	92.1	154.5	1440.25	1968.28	3750.66	3541.88
[K].IGIEIIKR.[T]	1xBiotin [K7]	1	1	P10809	P10809 [463-470]	P10809 1xBiotin [K469]	60 kDa heat shock protein, mitochondrial OS=Homo sapiens OX=9606 GN=HSPD1 PE=1 SV=2	1	1167.69	1.67	1.128	3.374	0.74	0.17	1.75	0.152625	0.915799	0.00584598	0.639043	1	0.0443431	75.7	88.3	48	126.4	99.6	162	69.3	47.2	69.1	80.5	84.6	63.7	31	43.8	86.6	115.3	149.5	113.5	66.9	157.6	90.9	244.1	147.8	138.5	3226.39	2196.94	3216.85	3751.27
[RK].EQIKTLNNK.[F]	1xBiotin [K4]	12	12	P35908; P04259; P05787; P13647	P35908 [180-188]; P04259 [165-173]; P05787 [93-101]; P13647 [170-178]	P35908 1xBiotin [K183]; P04259 1xBiotin [K168]; P05787 1xBiotin [K96]; P13647 1xBiotin [K173]	Keratin, type II cytoskeletal 2 epidermal OS=Homo sapiens OX=9606 GN=KRT2 PE=1 SV=2 Keratin, type II cytoskeletal 6B OS=Homo sapiens OX=9606 GN=KRT6B PE=1 SV=5 Keratin, type II cytoskeletal 8 OS=Homo sapiens OX=9606 GN=KRT8 PE=1 SV=7 Keratin, type II cytoskeletal 5 OS=Homo sapiens OX=9606 GN=KRT5 PE=1 SV=3	1	1313.69	1.452	1.121	1.63	0.54	0.16	0.7	0.482325	0.998468	0.771089	1	1	1	79.7	93.9	78.1	115.8	105.3	127.2	66.4	88.6	74.2	140.9	87.5	66.4	68.3	81	72.7	88.7	107.8	199.8	81	141.4	98	63	155.7	118.5	12922.4	17249.9	14448.8	27429.9
[R].FHILFKALGEEK.[G]	1xBiotin [K]	3	6	P32004	P32004 [1047-1058]	P32004 1xBiotin [K]	Neural cell adhesion molecule L1 OS=Homo sapiens OX=9606 GN=L1CAM PE=1 SV=2	1	1657.88	1.841	1.12	2.074	0.88	0.16	1.05	0.572426	0.938816	0.339119	1	1	1	68.6	113.6	53.4	126.3	127.3	110.8	57.8	105.5	65.9	130.6	109.1	54.5	51.3	51.1	76.8	121.2	113.9	126.8	212.2	66.2	122.2	142.9	106.4	85.7	1611.75	2945.26	1837.81	3643.99
[R].LPLQDVYKIGGIGTVPVGR.[V]	1xBiotin [K8]	3	2	P68104	P68104 [248-266]	P68104 1xBiotin [K255]	Elongation factor 1-alpha 1 OS=Homo sapiens OX=9606 GN=EEF1A1 PE=1 SV=1	1	2208.22	0.664	1.107	1.675	-0.59	0.15	0.74	1	0.9994	0.690477	1	1	1	109.1	119.4	62.4	72.4	132.2	104.5	92.5	63.6	99.3	101.2	117.9	45.7	52.9	63.9	49.4	228.2	45.8	61.4	174.6	45.3	112.1	300.5	88.6	57.3	3236.94	2225.33	3476.54	3543.53
[R].VNHVTLSQPKIVK.[W]	1xBiotin [K10]	1	53	P61769	P61769 [102-114]	P61769 1xBiotin [K111]	Beta-2-microglobulin OS=Homo sapiens OX=9606 GN=B2M PE=1 SV=1	1	1688.95	1.36	1.105	1.186	0.44	0.14	0.25	0.924665	0.999809	0.984383	1	1	1	83.6	101.6	86.3	113.7	112.3	102.4	68.8	94.6	86.6	157.6	92	105.3	51.7	113.3	89.5	79.4	118.8	117.8	88.7	123.3	116.4	60.5	106.1	129.6	153946	211613	193608	352332
[K].QISGFGKK.[F]	1xBiotin [K]	16	20	P15529	P15529 [238-245]	P15529 1xBiotin [K]	Membrane cofactor protein OS=Homo sapiens OX=9606 GN=CD46 PE=1 SV=3	1	1090.57	1.254	1.104	1.388	0.33	0.14	0.47	0.999977	0.941759	0.727836	1	1	1	80	117	72.6	100.3	129.2	100.8	144.3	74.7	68	109.1	111.6	101.4	67.6	91.7	67.8	93.6	77.9	110.3	120.5	142.3	119.1	94	75.1	131	78559.3	40651.6	37011.3	59401.6
[K].VYIYHSSSKGLLR.[Q]	1xBiotin [K9]	2	24	P26006	P26006 [399-411]	P26006 1xBiotin [K407]	Integrin alpha-3 OS=Homo sapiens OX=9606 GN=ITGA3 PE=1 SV=5	1	1748.92	0.969	1.094	1.188	-0.05	0.13	0.25	0.970026	0.998849	0.614972	1	1	1	91.7	102.5	93.6	88.9	112.2	111.2	83.9	85.4	88.7	176.4	79.1	95.5	61.4	87.2	91.4	81	150.6	82.8	104.5	115.5	88	103	103.6	122	80886.6	82374.4	85516.9	170074
[R].TKSTGGAPTFNVTVTK.[T]	1xBiotin [K2]	1	10	P07737	P07737 [90-105]	P07737 1xBiotin [K91]	Profilin-1 OS=Homo sapiens OX=9606 GN=PFN1 PE=1 SV=2	1	1834.94	1.683	1.084	0.958	0.75	0.12	-0.06	0.705202	0.998277	0.960199	1	1	1	82.6	84.6	103.2	139	91.7	98.9	34.1	84	143.8	72.2	100.1	86	29.3	104.9	118.4	171.6	96.1	141.3	93.2	138.3	78.2	69.1	138.8	100.5	2590.73	6371.86	10914.2	5477.71
[R].TEVTSKMFQK.[T]	1xBiotin [K6]	5	4	P16144	P16144 [383-392]	P16144 1xBiotin [K388]	Integrin beta-4 OS=Homo sapiens OX=9606 GN=ITGB4 PE=1 SV=5	1	1424.69	1.007	1.084	1.679	0.01	0.12	0.75	0.995231	0.999965	0.24073	1	1	0.925221	89.7	97.4	80.9	90.4	105.6	135.9	95.6	41.8	108.9	103.8	50.5	114.4	86.3	98.5	40.8	114.3	96.3	66.7	112.6	48.8	131.9	202.9	144.8	141	3340.52	1459.5	3802.86	3627.46
[K].EVSTYIKK.[I]	1xBiotin [K]	2	7	P68104	P68104 [173-180]	P68104 1xBiotin [K]	Elongation factor 1-alpha 1 OS=Homo sapiens OX=9606 GN=EEF1A1 PE=1 SV=1	1	1193.62	2.946	1.076	2.766	1.56	0.11	1.47	0.00529807	0.925955	0.124555	0.0384398	1	0.548784	47.5	99.3	54.8	140	106.9	151.5	29.8	52.6	41.7	94.1	87.1	84.9	48	47.7	77.5	122.8	111.4	243.6	93.7	188.3	87.2	78.1	178.8	132.8	3994.02	7044.58	5583.6	12608.4
[K].GFTLNPDKK.[T]	1xBiotin [K]	3	13	O00339	O00339 [390-398]	O00339 1xBiotin [K]	Matrilin-2 OS=Homo sapiens OX=9606 GN=MATN2 PE=1 SV=4	1	1245.63	1.323	1.075	1.242	0.4	0.1	0.31	0.637162	0.646806	0.856756	1	1	1	90.4	89.9	90.7	119.6	96.6	112.7	92.9	66.3	108	95.1	92.4	75.7	81.8	93.9	93.2	123.8	90.4	122.8	99.3	143.3	95.8	82.6	127.1	115.8	21165.9	15123.6	24607.4	21675.2
[K].TMQNVKHPVTGQFLYQDSNWASK.[V]	1xBiotin [K6]	1	1	P02786	P02786 [509-531]	P02786 1xBiotin [K514]	Transferrin receptor protein 1 OS=Homo sapiens OX=9606 GN=TFRC PE=1 SV=2	1	2905.38	1.306	1.074	1.389	0.39	0.1	0.47	0.984987	0.99895	0.994232	1	1	1	86.7	94	85.9	113.2	100.9	119.3	61	124.8	82.9	56	117.4	89.8	94.2	82.1	68	242.9	50.2	108.2	133.9	96.5	69.3	154.7	54.2	114	2008.64	4110.14	2729.03	1844.81
[K].NQVALNPQNTVFDAKR.[L]	1xBiotin [K15]	2	22	P0DMV9	P0DMV9 [57-72]	P0DMV9 1xBiotin [K71]	Heat shock 70 kDa protein 1B OS=Homo sapiens OX=9606 GN=HSPA1B PE=1 SV=1	1	2041.03	0.404	1.068	0.753	-1.31	0.09	-0.41	0.256688	0.999101	0.582062	0.952674	1	1	155.7	67.3	138.2	62.9	71.9	104	185.5	123.2	152.5	131.5	65.9	27.1	186.6	135.3	130.2	93.8	61.6	30.6	67.5	77.6	70.4	30	128.9	101.8	24331.6	16156.6	19999.7	17252.4
[K].LKGIIIMGEDDDSHPSEMR.[L]	1xBiotin [K2]	2	1	Q9GZP4	Q9GZP4 [88-106]	Q9GZP4 1xBiotin [K89]	PITH domain-containing protein 1 OS=Homo sapiens OX=9606 GN=PITHD1 PE=1 SV=1	1	2369.09	1.161	1.063	0.855	0.22	0.09	-0.23	0.992585	0.999259	0.78121	1	1	1	101.1	82	114.4	117.5	87.1	97.9	110.9	53.5	93.6	75.9	90.9	70	310.9	105.8	62.2	117.4	108.7	77.1	80.6	110.4	77	51.9	90.5	112.7	3944.96	1902.62	3329.6	2699.36
[R].IIALDGDTKNSTFSEIFK.[K]	1xBiotin [K9]	2	2	P29401	P29401 [335-352]	P29401 1xBiotin [K343]	Transketolase OS=Homo sapiens OX=9606 GN=TKT PE=1 SV=3	1	2225.12	0.791	1.055	0.85	-0.34	0.08	-0.23	0.996491	0.999907	0.60679	1	1	1	86	100.6	129.4	68	106.1	109.9	54.4	51.6	78.2	86.7	63.7	31	680	82	81.1	75.5	31.1	43.1	47.4	77.5	67.2	149.7	30.1	69.7	2600.64	2464.84	3734.39	4142.01
[K].YLGYLKIEFDER.[G]	1xBiotin [K6]	2	2	P21589	P21589 [286-297]	P21589 1xBiotin [K291]	5'-nucleotidase OS=Homo sapiens OX=9606 GN=NT5E PE=1 SV=1	1	1771.87	1.128	1.051	0.574	0.17	0.07	-0.8	0.977773	0.999872	0.990576	1	1	1	91.1	113.4	110.3	102.7	119.1	63.4	77.3	115.5	79.2	98.6	119.3	81.8	70.2	95.9	115.9	176.5	89.3	84.9	117.4	103.6	97.9	173.6	48.2	55.1	2584.95	3864.22	2648.73	3298.85
[R].LKDKWDELK.[E]	1xBiotin [K2]	2	1	O00592	O00592 [428-436]	O00592 1xBiotin [K429]	Podocalyxin OS=Homo sapiens OX=9606 GN=PODXL PE=1 SV=2	2	1400.72	1.269	1.042	1.261	0.34	0.06	0.33	0.952786	0.912858	0.993603	1	1	1	68.8	89	116	87.3	92.7	146.2	33.8	70.1	104.6	82.1	119.3	90.7	31.1	219.7	118.1	132.6	85	88.9	94.4	16.9	107.7	70.7	148.9	185.3	3199.13	6635.26	9900.86	7768.05
[K].YKDSAQR.[D]	1xBiotin [K2]	2	7	P05026	P05026 [112-118]	P05026 1xBiotin [K113]	Sodium/potassium-transporting ATPase subunit beta-1 OS=Homo sapiens OX=9606 GN=ATP1B1 PE=1 SV=1	1	1093.51	1.038	1.037	1.511	0.05	0.05	0.6	0.996008	0.998224	0.321169	1	1	1	94.4	113.8	70	98	118	105.8	160.6	69.8	88.1	167.7	78.7	106.2	59.7	65.4	79.8	102.5	75.3	91.4	110.1	110.1	87.1	98.7	159	89.8	33927.2	14739.9	18605.9	35422.8
[R].VTQKSYK.[V]	1xBiotin [K4]	2	14	P05787	P05787 [5-11]	P05787 1xBiotin [K8]	Keratin, type II cytoskeletal 8 OS=Homo sapiens OX=9606 GN=KRT8 PE=1 SV=7	1	1079.56	1.671	1.036	2.855	0.74	0.05	1.51	0.270865	0.978185	0.00374846	0.987992	1	0.0303285	80.3	93.1	50.9	134.1	96.5	145.2	127.5	59.7	76.4	151.5	88	88.6	46.6	48.4	51.7	157	110.7	127.6	88.2	96.7	91.8	96.6	154.9	138.1	45462	21286.9	27239.2	54001.4
[R].YMGKGVSK.[A]	1xBiotin [K4]; 1xOxidation [M2]	1	8	P06733	P06733 [57-64]	P06733 1xBiotin [K60]	Alpha-enolase OS=Homo sapiens OX=9606 GN=ENO1 PE=1 SV=2	1	1111.53	0.987	1.032	0.82	-0.02	0.05	-0.29	0.999611	0.976613	0.787658	1	1	1	96.3	125.6	84.3	95	129.7	69.1	113.8	89.9	81.1	117.4	74.8	122.4	75.6	136.7	78.7	65.1	88.7	179.2	121.2	108.7	139.2	54.1	88.9	64.5	17568.1	13883.4	12523.4	18121.4
[R].ASCESDVLHFTSTTTSKNR.[I]	1xBiotin [K17]; 1xCarbamidomethyl [C3]	1	18	P08069	P08069 [486-504]	P08069 1xBiotin [K502]	Insulin-like growth factor 1 receptor OS=Homo sapiens OX=9606 GN=IGF1R PE=1 SV=1	1	2367.07	1.437	1.023	1.104	0.52	0.03	0.14	0.906614	0.999562	0.946499	1	1	1	70.8	111.7	95.8	101.7	114.3	105.8	106.8	53.6	65.6	236.6	62.8	103.6	99.1	59.8	88.9	94.3	122	76.8	106	94.6	118.7	98.1	97.4	115.5	25752.4	12922.5	15824.2	57049.3
[K].AGDSLMVMIAMKMEHTIK.[S]	1xBiotin [K]	1	10	Q96RQ3	Q96RQ3 [670-687]	Q96RQ3 1xBiotin [K]	Methylcrotonoyl-CoA carboxylase subunit alpha, mitochondrial OS=Homo sapiens OX=9606 GN=MCCC1 PE=1 SV=3	1	2232.07	4.123	1.022	0.981	2.04	0.03	-0.03	0.791948	0.999993	0.999999	1	1	1	31.5	142.5	75.9	130	145.7	74.4	19.2	13.6	114.7	18	86.9	153.1	108.6	46.2	27.4	595.3	79.3	23.1	260.5	14.9	88.8	45.4	71.4	33.6	2146.85	1514.64	12814.5	2009.47
[K].KYVIYIER.[V]	1xBiotin [K1]	2	3	P61254	P61254 [77-84]	P61254 1xBiotin [K77]	60S ribosomal protein L26 OS=Homo sapiens OX=9606 GN=RPL26 PE=1 SV=1	1	1309.7	0.565	1.021	0.404	-0.82	0.03	-1.31	0.698385	0.945637	0.466792	1	1	1	157.6	79.3	137.5	89	80.9	55.5	213.1	166.7	76	83.9	110.3	81.2	59.3	145.5	193.1	66.9	99	94.2	40	85.6	90.7	51.5	84.3	58.8	8433.44	6599.62	3006.89	3319.91
[R].KTLYNNQPIDFLK.[K]	1xBiotin [K1]	1	2	Q13867	Q13867 [297-309]	Q13867 1xBiotin [K297]	Bleomycin hydrolase OS=Homo sapiens OX=9606 GN=BLMH PE=1 SV=1	1	1819.94	0.891	1.018	0.646	-0.17	0.03	-0.63	0.972652	0.999968	0.781347	1	1	1	113.7	99.2	112.2	101.3	101	72.5	191.9	105.9	69.7	116.4	83.8	92.4	237.9	104.5	48.6	113.9	94.4	57.1	107.6	72.8	94.1	99.8	67.6	41.3	6875.77	3795.98	2498.45	4170.98
[R].LNEIDKESQKPFEVKGPLPVHTK.[S]	1xBiotin [K15]	1	3	P56181-2	P56181-2 [274-296]	P56181-2 1xBiotin [K288]	Isoform 2 of NADH dehydrogenase [ubiquinone] flavoprotein 3, mitochondrial OS=Homo sapiens OX=9606 GN=NDUFV3	2	2859.51	0.387	1.017	0.373	-1.37	0.02	-1.42	0.128403	0.848512	0.218055	0.581077	1	0.852245	152.3	59.4	195.8	59	60.4	73.1	380	91.9	96.3	279.7	32.4	37.6	280.4	123.9	122.4	48.6	21.5	37.3	46.2	30.2	38.2	46.3	49.5	37.5	25563.1	6181.66	6480.13	18814.1
[K].FYEQFSKNIK.[L]	1xBiotin [K7]	2	4	P07900	P07900 [437-446]	P07900 1xBiotin [K443]	Heat shock protein HSP 90-alpha OS=Homo sapiens OX=9606 GN=HSP90AA1 PE=1 SV=5	1	1529.75	0.868	1.017	0.516	-0.2	0.02	-0.95	0.999991	0.999994	0.906549	1	1	1	81	80.3	189.2	70.3	81.7	97.6	50.1	74.4	101.8	73.8	198.7	37.5	303.7	173.8	49.3	64.6	81.8	59.5	75	70.4	123.3	81.2	91.6	89.7	2016.81	2998.15	4100.31	2971.31
[R].FLEQQNKMLETK.[W]	1xBiotin [K7]	2	12	P05787	P05787 [111-122]	P05787 1xBiotin [K117]	Keratin, type II cytoskeletal 8 OS=Homo sapiens OX=9606 GN=KRT8 PE=1 SV=7	1	1734.86	1.112	1.013	1.382	0.15	0.02	0.47	0.752265	0.999998	0.754609	1	1	1	98.2	87.3	91	109.2	88.4	125.9	21.6	135.9	94.3	83.8	149.6	48.3	115.5	87.5	21.9	202.3	104.9	101	84.9	113.5	73.3	100.7	120.9	139.9	1758.08	11042.2	7666.95	6811.88
[K].ITYKYTGK.[G]	1xBiotin [K4]	1	12	Q14126	Q14126 [85-92]	Q14126 1xBiotin [K88]	Desmoglein-2 OS=Homo sapiens OX=9606 GN=DSG2 PE=1 SV=2	1	1199.61	1.462	1.012	1.662	0.55	0.02	0.73	0.96202	1	0.883611	1	1	1	80	99	76.5	117	100.3	127.1	21.7	91.9	147.8	74.6	119.1	113.7	19.7	87.8	106.2	59.7	134.3	140.6	75.4	115.1	126.8	43	176.7	145.9	3241.16	13716.6	22065.4	11144.3
[R].HEMLPEFYKTVSPALISR.[F]	1xBiotin [K9]; 1xOxidation [M3]	3	2	Q86VP6	Q86VP6 [365-382]	Q86VP6 1xBiotin [K373]	Cullin-associated NEDD8-dissociated protein 1 OS=Homo sapiens OX=9606 GN=CAND1 PE=1 SV=2	1	2360.18	0.815	1.008	1.432	-0.3	0.01	0.52	0.992554	0.978225	0.484996	1	1	1	114.4	92.3	85.1	93.3	93	121.8	103.4	46.8	96.8	78.1	84	58.9	72	87.2	41.6	166.5	78.9	70.2	224.1	52	78.7	267.7	103.1	89.9	4167.04	1884.68	3902.56	3147.47
[K].GGVVGIKVDK.[G]	1xBiotin [K7]	2	2	P04075	P04075 [102-111]	P04075 1xBiotin [K108]	Fructose-bisphosphate aldolase A OS=Homo sapiens OX=9606 GN=ALDOA PE=1 SV=2	1	1197.67	0.887	1.008	0.979	-0.17	0.01	-0.03	0.998758	0.999676	0.999748	1	1	1	115.4	80.5	111.4	102.4	81.1	109.1	40.3	136.8	123.6	52.7	86.2	118.5	77.4	119.3	135.4	30.9	129.1	109.7	76.7	113.1	86.8	101.5	145.1	116.8	1871.02	6351.29	5738.28	2446.11
[R].LNKAVWAK.[G]	1xBiotin [K3]	3	1	P62899	P62899 [68-75]	P62899 1xBiotin [K70]	60S ribosomal protein L31 OS=Homo sapiens OX=9606 GN=RPL31 PE=1 SV=1	1	1155.63	1.008	1.002	0.387	0.01	0	-1.37	0.967076	0.995497	0.337115	1	1	1	88.2	79.2	190.5	88.9	79.4	73.8	24.9	103	100.5	30.7	90.2	129.3	105.7	222.5	217	101.3	72.3	105	57	139.7	90.4	31.8	94.6	84	2867.3	11885.7	11594.8	3544.43
[K].KPVDFETK.[R]	1xBiotin [K1]	2	1	P55287	P55287 [333-340]	P55287 1xBiotin [K333]	Cadherin-11 OS=Homo sapiens OX=9606 GN=CDH11 PE=1 SV=2	0	1189.59	0.98	0.999	1.456	-0.03	0	0.54	0.999993	0.999774	0.999901	1	1	1	92.1	116.7	75	90.3	116.6	109.3	161.2	80	54.9	217.1	101.4	29.7	168.5	65.2	52.5	125.8	59.1	78.4	154.2	101.3	61.8	127.8	66	94.9	10937.4	5427.08	3725.49	14729.2
[R].LKGIVPLAK.[V]	1xBiotin [K2]	1	14	P30101	P30101 [74-82]	P30101 1xBiotin [K75]	Protein disulfide-isomerase A3 OS=Homo sapiens OX=9606 GN=PDIA3 PE=1 SV=4	1	1164.72	0.735	0.996	0.783	-0.44	-0.01	-0.35	0.304551	0.999892	0.283926	1	1	1	116.9	106.4	103.6	85.9	105.9	81.2	94.9	116.6	127.2	106.1	126.5	99.1	101.9	103.3	120.5	63.2	85.7	94.9	105.6	139.5	81.4	60.9	92	80.9	25964.7	31906.2	34807	29037.4
[R].NNELIAVGKGSSLK.[R]	1xBiotin [K9]	1	75	O00622	O00622 [195-208]	O00622 1xBiotin [K203]	CCN family member 1 OS=Homo sapiens OX=9606 GN=CCN1 PE=1 SV=1	1	1655.88	0.862	0.99	1.013	-0.21	-0.01	0.02	0.995529	0.834883	0.999999	1	1	1	102.8	118.1	86.2	88.7	116.9	87.3	78.3	99	100.6	82	113.6	113.8	82.9	77.7	87.8	74.7	85.3	162.7	178.8	112.5	105	69.4	92	84	700993	886006	900302	734147
[K].YNPNVLPVQCTGKR.[D]	1xBiotin [K13]; 1xCarbamidomethyl [C10]	2	11	P05026	P05026 [204-217]	P05026 1xBiotin [K216]	Sodium/potassium-transporting ATPase subunit beta-1 OS=Homo sapiens OX=9606 GN=ATP1B1 PE=1 SV=1	1	1871.93	0.986	0.98	0.725	-0.02	-0.03	-0.46	0.95046	0.982073	0.992949	1	1	1	88.8	101.6	129	87.5	99.6	93.5	170.3	86	78.8	55.7	98.5	114.4	71.1	135	125.1	67.1	84.8	92.8	84.4	142.5	96.5	52.2	154.2	90.6	15839.8	8000.58	7330.44	5179.26
[K].KLEGQISAR.[Q]	1xBiotin [K1]	3	7	P78380	P78380 [80-88]	P78380 1xBiotin [K80]	Oxidized low-density lipoprotein receptor 1 OS=Homo sapiens OX=9606 GN=OLR1 PE=1 SV=1	1	1227.65	1.568	0.973	1.465	0.65	-0.04	0.55	0.411217	1	0.620953	1	1	1	76.3	110.7	75.4	119.6	107.7	110.4	79.9	75.9	75.1	108	110.2	120.9	45	91.6	75	148.2	97.4	119	107.3	126.1	106.5	54.9	149.2	109.9	14273.1	13565.6	13412.1	19288.2
[R].SGKYDLDFK.[S]	1xBiotin [K3]	2	26	P06733	P06733 [254-262]	P06733 1xBiotin [K256]	Alpha-enolase OS=Homo sapiens OX=9606 GN=ENO1 PE=1 SV=2	1	1298.61	1.586	0.969	0.724	0.67	-0.05	-0.47	0.591027	0.971279	0.986156	1	1	1	88.3	91	111.7	140	88.2	80.9	80.8	73.9	101.5	83.3	92	73.5	134.4	79.1	102.3	128.2	138.5	110.3	69	172.9	80.7	67.9	137.4	74.1	52440.9	47949.6	65834.5	54047.3
[R].ALSTGEKGFGYK.[G]	1xBiotin [K7]	1	31	P62937	P62937 [38-49]	P62937 1xBiotin [K44]	Peptidyl-prolyl cis-trans isomerase A OS=Homo sapiens OX=9606 GN=PPIA PE=1 SV=2	1	1483.72	0.693	0.961	0.881	-0.53	-0.06	-0.18	0.29358	0.698633	0.40708	1	1	1	110.8	127.1	86.8	76.7	122.2	76.4	105.9	109.6	122.6	171.8	125.7	120.9	85.2	85.8	126.2	63.2	75.9	80	72.2	127.3	120.8	43.3	75.6	88	81296.6	84151.7	94175.1	131945
[K].VAAYGGKLR.[Y]	1xBiotin [K7]	1	10	P98160	P98160 [1408-1416]	P98160 1xBiotin [K1414]	Basement membrane-specific heparan sulfate proteoglycan core protein OS=Homo sapiens OX=9606 GN=HSPG2 PE=1 SV=4	1	1160.62	0.787	0.96	1.004	-0.35	-0.06	0.01	0.855523	0.999833	0.986747	1	1	1	110.7	112.7	90.5	87.1	108.1	90.9	181	104.5	80.6	85	106.4	120.6	49.8	129.4	85.5	82.3	80	91.1	68.6	127.1	102.1	72.6	85.8	147.6	26632.4	15384.2	11861.2	12506.1
[K].NVLSLTNKGEVFNELVGK.[Q]	1xBiotin [K8]	5	5	P05556	P05556 [221-238]	P05556 1xBiotin [K228]	Integrin beta-1 OS=Homo sapiens OX=9606 GN=ITGB1 PE=1 SV=2	1	2187.15	1.543	0.949	1.002	0.63	-0.08	0	0.655156	0.996668	0.912175	1	1	1	87.4	93.5	97.6	134.9	88.7	97.8	28.7	58.4	46.4	28.8	76.8	49.6	66	51.8	29.9	441.3	71.5	62.1	216.2	47.1	28.6	405.6	51.9	39.4	1553.29	3158.92	2508.56	1557.07
[KR].TEKIYDDHRK.[F]	1xBiotin [K3]	4	10	Q9P273; Q9NT68	Q9P273 [1785-1794]; Q9NT68 [1857-1866]	Q9P273 1xBiotin [K1787]; Q9NT68 1xBiotin [K1859]	Teneurin-3 OS=Homo sapiens OX=9606 GN=TENM3 PE=1 SV=3 Teneurin-2 OS=Homo sapiens OX=9606 GN=TENM2 PE=1 SV=3	2	1530.74	1.987	0.949	2.087	0.99	-0.08	1.06	0.565666	0.999643	0.886765	1	1	1	60.5	119.8	60.1	120.3	113.7	125.5	109.6	44.9	57	152.7	112.8	71.4	56.6	163	52.4	116.1	113.2	108.4	77.9	107	111.4	74.7	153.1	118.1	25981.6	10639.2	13512.7	36207.8
[R].ILLQSKNAGAVIGK.[G]	1xBiotin [K6]	3	14	P61978	P61978 [47-60]	P61978 1xBiotin [K52]	Heterogeneous nuclear ribonucleoprotein K OS=Homo sapiens OX=9606 GN=HNRNPK PE=1 SV=1	1	1637.94	0.73	0.948	0.549	-0.45	-0.08	-0.87	0.793747	0.999926	0.272145	1	1	1	114.3	104.2	128.7	83.4	98.8	70.7	81	112.4	145.1	84.3	135.8	102.5	86.3	126.7	148.1	82	90.1	73.8	68.6	97.2	152	50.8	69.5	93.8	13127.9	18220.2	23522	13655.6
[K].KDVDAAYMSK.[V]	1xBiotin [K1]	1	15	P08729	P08729 [199-208]	P08729 1xBiotin [K199]	Keratin, type II cytoskeletal 7 OS=Homo sapiens OX=9606 GN=KRT7 PE=1 SV=5	1	1353.62	1.238	0.946	1.15	0.31	-0.08	0.2	0.510979	1	0.987552	1	1	1	78.2	111.1	97	96.9	105.1	111.6	10.4	78.7	94.2	95.7	116.8	111.8	91.2	97.6	101.3	66.3	97.5	119.1	99.8	129	105.8	112.3	109.1	163.5	1581.82	11964.5	14314.8	14547.4
[K].INAKLNYVPLEK.[Q]	1xBiotin [K4]	1	4	Q7L014	Q7L014 [904-915]	Q7L014 1xBiotin [K907]	Probable ATP-dependent RNA helicase DDX46 OS=Homo sapiens OX=9606 GN=DDX46 PE=1 SV=2	1	1627.89	0.325	0.938	0.346	-1.62	-0.09	-1.53	0.234096	0.999998	0.125221	0.900629	1	0.5499	186.8	74.1	155.3	60.6	69.4	53.8	55.8	191.9	228.7	104.5	69.3	76.1	111.8	196.6	159.6	67	44.6	62.3	71.3	128.1	54.2	87.7	35.3	55.2	2480.6	8525.4	10161	4642.23
[K].KSVQYDDVPEYK.[D]	1xBiotin [K1]	3	25	Q13740	Q13740 [76-87]	Q13740 1xBiotin [K76]	CD166 antigen OS=Homo sapiens OX=9606 GN=ALCAM PE=1 SV=2	1	1696.79	1.729	0.934	1.374	0.79	-0.1	0.46	0.422008	0.999995	0.798139	1	1	1	81.1	114.7	66.1	140.1	107.1	90.8	85.4	51.1	85.5	158	74.4	120.9	62.4	69.7	74.2	192.4	61.5	147.7	114.2	100.1	112.9	81.5	112.6	95.7	39517.7	23658.4	39553.5	73120.3
[K].TMQNVKHPVTGQFLYQDSNWASK.[V]	1xBiotin [K6]; 1xOxidation [M2]	1	1	P02786	P02786 [509-531]	P02786 1xBiotin [K514]	Transferrin receptor protein 1 OS=Homo sapiens OX=9606 GN=TFRC PE=1 SV=2	1	2921.37	1.294	0.929	1.046	0.37	-0.11	0.07	0.461025	0.999928	0.999952	1	1	1	89.9	103.7	94.7	116.3	96.3	99.1	81.3	85	95.7	98.1	62.4	109.4	68.6	102.5	89.6	278.8	110	105.8	96.4	63.8	91.1	120.3	93.7	47.4	3044.19	3181.88	3583.74	3673.03
[R].GCVGEVSVNGKR.[L]	1xBiotin [K11]; 1xCarbamidomethyl [C2]	1	13	P98160	P98160 [4075-4086]	P98160 1xBiotin [K4085]	Basement membrane-specific heparan sulfate proteoglycan core protein OS=Homo sapiens OX=9606 GN=HSPG2 PE=1 SV=4	1	1487.71	5.965	0.926	0.998	2.58	-0.11	0	0.000740728	0.970153	0.999959	0.0067731	1	1	16.9	132.4	113.8	100.8	122.6	113.5	23.5	17.6	16.6	41.8	141.3	138.1	118.6	71.3	172.1	105.1	101.9	133.3	92	136.5	127.9	103.4	140.8	118.4	2012	1510.07	1426.35	3582.42
[K].ATFNPAQDKCGIR.[L]	1xBiotin [K9]; 1xCarbamidomethyl [C10]	2	65	O00592	O00592 [386-398]	O00592 1xBiotin [K394]	Podocalyxin OS=Homo sapiens OX=9606 GN=PODXL PE=1 SV=2	1	1703.8	0.937	0.924	1.26	-0.09	-0.11	0.33	0.727243	0.971507	0.999761	1	1	1	99.9	109.4	86.7	93.7	101	109.2	249.9	79.6	90.3	98.9	158.4	86.8	75.9	78.4	86.7	84.6	84.7	87.3	91.3	88.7	95.6	63.4	100.8	98.7	470312	149745	169971	186048
[K].GKLDVQFSGLTKGDAVR.[D]	1xBiotin [K12]	2	16	P21333	P21333 [905-921]	P21333 1xBiotin [K916]	Filamin-A OS=Homo sapiens OX=9606 GN=FLNA PE=1 SV=4	2	2017.05	0.615	0.912	0.646	-0.7	-0.13	-0.63	0.733413	0.999578	0.572818	1	1	1	129.7	98	123.4	79.8	89.3	79.8	310.8	95.2	117.1	135.5	26.4	88.5	149.3	111.5	100.1	91.5	72	48.2	80.7	57.6	114.1	72	11	118.8	43373.9	13278.3	16339.8	18903.5
[R].TSRPENAIIYNNNEDFQVGQAKVVLK.[S]	1xBiotin [K22]	2	1	P29401	P29401 [472-497]	P29401 1xBiotin [K493]	Transketolase OS=Homo sapiens OX=9606 GN=TKT PE=1 SV=3	1	3173.6	0.55	0.909	0.893	-0.86	-0.14	-0.16	0.588061	0.996761	0.775564	1	1	1	132.2	89.7	118.3	72.7	81.5	105.7	120.4	117.2	112.8	79.5	74.9	98	328	104.9	68.2	43.8	64.4	103.9	72.3	87.4	57.6	93.7	55.5	117.5	4162.59	4049.74	3899.28	2748.62
[R].KAAALEFLNR.[F]	1xBiotin [K1]	2	1	P31948	P31948 [78-87]	P31948 1xBiotin [K78]	Stress-induced-phosphoprotein 1 OS=Homo sapiens OX=9606 GN=STIP1 PE=1 SV=1	1	1358.72	0.817	0.905	0.41	-0.29	-0.14	-1.28	0.447691	0.774746	0.0265951	1	1	0.158502	103.2	102.2	154.4	84.3	92.5	63.4	163	104.4	91.2	144.6	103.4	94.4	120.4	156.1	161.7	91.5	85.3	49.4	93.8	93.6	61.5	64.1	35.9	85.6	7220.9	4627.6	4039.21	6408.59
[R].KLLEGEEER.[L]	1xBiotin [K1]	8	5	P02545	P02545 [378-386]	P02545 1xBiotin [K378]	Prelamin-A/C OS=Homo sapiens OX=9606 GN=LMNA PE=1 SV=1	1	1328.65	1.087	0.905	1.342	0.12	-0.14	0.42	0.974021	0.99102	0.984363	1	1	1	85.1	130.4	74.3	92.4	118	99.8	83.4	39.7	136	100.2	158.4	127.9	72.9	71.3	95.2	90.7	64.1	143.4	81.9	132	115.8	80.3	109	97.8	8377.42	3986.65	13652.1	10059.6
[R].WFQQKYDGIILPGK.[-]	1xBiotin [K5]	2	2	P62913	P62913 [165-178]	P62913 1xBiotin [K169]	60S ribosomal protein L11 OS=Homo sapiens OX=9606 GN=RPL11 PE=1 SV=2	1	1918.99	1.353	0.901	1.853	0.44	-0.15	0.89	0.995954	0.99925	0.99471	1	1	1	93.7	112.3	58.2	126.8	101.2	107.8	57.8	59.2	63.6	173.6	42.6	70.9	619	34	36.7	79.6	81.6	80	59.8	63.8	74.6	61.6	68	73.3	2952.14	3018.86	3247.56	8861.71
[R].EKIFVPSK.[G]	1xBiotin [K2]	2	10	Q99715	Q99715 [528-535]	Q99715 1xBiotin [K529]	Collagen alpha-1(XII) chain OS=Homo sapiens OX=9606 GN=COL12A1 PE=1 SV=2	1	1173.63	0.684	0.893	0.581	-0.55	-0.16	-0.78	0.872837	0.917097	0.98041	1	1	1	107	113	130.1	73.2	101	75.6	238.5	65.2	80.9	267.1	85.4	69.6	146.9	98.3	63.3	125.4	37.8	55.3	116	76.3	44.6	123.5	57.1	48.8	667177	182385	226180	747169
[R].AGEKGVAYTLLTPK.[D]	1xBiotin [K4]	2	49	Q86XP3	Q86XP3 [592-605]	Q86XP3 1xBiotin [K595]	ATP-dependent RNA helicase DDX42 OS=Homo sapiens OX=9606 GN=DDX42 PE=1 SV=1	1	1673.89	0.633	0.891	0.542	-0.66	-0.17	-0.88	0.358817	0.978293	0.325693	1	1	1	116.7	92.2	152.4	73.9	82.1	82.7	81.7	108.1	191.6	85.4	85.1	108.9	141.2	122.8	181	48.8	81.1	68.4	52.1	76.1	107.5	44.1	139.6	76.6	56193.3	74393.1	131823	58759.3
[K].GATVVTGGKR.[H]	1xBiotin [K9]	2	13	P51649	P51649 [403-412]	P51649 1xBiotin [K411]	Succinate-semialdehyde dehydrogenase, mitochondrial OS=Homo sapiens OX=9606 GN=ALDH5A1 PE=1 SV=2	1	1171.63	1.532	0.887	1.183	0.61	-0.17	0.24	0.948405	1	0.99883	1	1	1	92.6	91.9	88	141.8	81.6	104.1	91.4	107.6	90.2	90.7	87.1	110.4	47.3	92.9	86.9	238.2	80	139.9	70.5	144.8	80.5	19.4	102.8	119.2	13145.7	15485.1	12983.2	13052.7
[K].FQSKYEPR.[S]	1xBiotin [K4]	1	25	P13667	P13667 [363-370]	P13667 1xBiotin [K366]	Protein disulfide-isomerase A4 OS=Homo sapiens OX=9606 GN=PDIA4 PE=1 SV=2	1	1280.61	0.676	0.881	0.955	-0.57	-0.18	-0.07	0.493517	0.999778	0.998928	1	1	1	126.5	104.9	97.6	85.4	92.4	93.2	126	131.2	90.1	90.5	105.7	104.6	67.8	97.2	131.8	75.8	85.1	99.1	87.4	109.9	92.1	92.9	121.1	91.6	38909	40495.6	27831.5	27928.3
[R].KSSTPEEVK.[K]	1xBiotin [K1]	1	17	P23528	P23528 [22-30]	P23528 1xBiotin [K22]	Cofilin-1 OS=Homo sapiens OX=9606 GN=CFL1 PE=1 SV=3	1	1230.6	0.752	0.877	1.368	-0.41	-0.19	0.45	0.837594	0.904533	0.999999	1	1	1	93.2	103.6	102.3	70.1	90.8	139.9	108.2	92	91.2	132.5	102.2	10.3	175.7	100.9	90.9	8.5	69.1	126.5	77.6	172.9	89.6	66.2	138	147.7	31367.6	26666.3	26439.2	38423.3
[K].YRPKYCGSCVDGR.[C]	1xBiotin [K4]; 2xCarbamidomethyl [C6; C9]	1	7	O00622	O00622 [309-321]	O00622 1xBiotin [K312]	CCN family member 1 OS=Homo sapiens OX=9606 GN=CCN1 PE=1 SV=1	1	1843.8	1.04	0.869	1.016	0.06	-0.2	0.02	0.996778	0.883481	1	1	1	1	86	117.5	101.7	89.4	102.1	103.4	89	88.3	90.6	123.1	121.7	30.4	105.3	78.3	119.3	141.2	83.8	92.6	105.7	135.4	87	107.1	76.5	124.6	9006.06	8929.33	9161.34	12451.5
[R].NKVISDFK.[K]	1xBiotin [K2]	2	14	Q86XP3	Q86XP3 [538-545]	Q86XP3 1xBiotin [K539]	ATP-dependent RNA helicase DDX42 OS=Homo sapiens OX=9606 GN=DDX42 PE=1 SV=1	1	1176.61	0.487	0.868	0.703	-1.04	-0.2	-0.51	0.188763	0.410886	0.192803	0.76282	1	0.780714	132.6	111	114.8	64.6	96.3	80.6	113.3	131.9	128.7	107.7	173.9	103	111.3	107.5	123.3	57.7	62.7	113.8	93.4	100.8	61.8	50.6	80.4	78.2	34156.8	39755.2	38798	32469.9
[K].GQLTKSPLAQMEEERR.[E]	1xBiotin [K5]	2	7	Q16181	Q16181 [329-344]	Q16181 1xBiotin [K333]	Septin-7 OS=Homo sapiens OX=9606 GN=SEPTIN7 PE=1 SV=2	2	2099.04	0.707	0.863	0.678	-0.5	-0.21	-0.56	0.30634	0.638576	0.449977	1	1	1	133.7	95.2	115.8	94.6	82.2	78.5	193.7	107.2	129.6	139.1	92.3	81.7	112.3	111.9	121.5	100.7	64.1	91.7	95	47.4	79.7	76.1	52.4	103.7	22833.7	12639.6	15279.6	16401.7
[K].AHFSSKCR.[R]	1xBiotin [K6]; 1xCarbamidomethyl [C7]	5	2	P25445	P25445 [95-102]	P25445 1xBiotin [K100]	Tumor necrosis factor receptor superfamily member 6 OS=Homo sapiens OX=9606 GN=FAS PE=1 SV=1	1	1218.55	0.436	0.861	0.884	-1.2	-0.22	-0.18	0.577369	0.979875	1	1	1	1	146.8	122.2	85.8	64	105.3	75.9	175.7	54.6	125.5	104.5	101.8	134	73.4	61.7	188.8	67.8	49.3	54.7	80	90	90.8	63.5	64.9	218.9	29631.1	9200.57	21165.9	17627.3
[R].AGKITFAEK.[V]	1xBiotin [K3]	1	25	P02786	P02786 [259-267]	P02786 1xBiotin [K261]	Transferrin receptor protein 1 OS=Homo sapiens OX=9606 GN=TFRC PE=1 SV=2	1	1190.62	0.887	0.86	1.449	-0.17	-0.22	0.54	1	0.998902	0.790305	1	1	1	91.9	115	86.9	81.5	98.9	125.9	107	64.1	85.8	166.6	107.3	67.1	44.7	81.1	100.6	76.1	57.3	130	91	201.9	92.3	80.6	128.9	117.5	85164.7	50995.4	68300.3	132583
[R].LDVPQNLMFGKWK.[Y]	1xBiotin [K]	3	4	Q13740	Q13740 [45-57]	Q13740 1xBiotin [K]	CD166 antigen OS=Homo sapiens OX=9606 GN=ALCAM PE=1 SV=2	1	1801.91	1.851	0.854	1.989	0.89	-0.23	0.99	0.915053	0.992388	0.828321	1	1	1	74.2	99.9	68	137.3	85.3	135.3	41.1	51.9	83.7	97	59.7	69.9	114.4	37.6	47.6	222.9	96.1	42.1	309.8	59.7	54.5	255.7	61.4	94.7	1697.91	2145.63	3456.75	4008.03
[R].LKTDNAGDQHGGGGGGGGGAGAAGGGGGGENYDDPHK.[T]	1xBiotin [K2]	1	4	P14866	P14866 [61-97]	P14866 1xBiotin [K62]	Heterogeneous nuclear ribonucleoprotein L OS=Homo sapiens OX=9606 GN=HNRNPL PE=1 SV=2	1	3448.46	0.81	0.854	0.22	-0.3	-0.23	-2.18	0.972531	0.43603	0.0792371	1	1	0.387478	66.2	81.9	269.1	53.7	69.9	59.2	39	149.7	51.9	318.6	64	64.2	211.1	295.8	149.9	74.2	42.1	35.3	56.7	54.8	30.6	76.7	38.9	46.5	2113.89	8107.15	2813.41	17255
[R].LNKDGSLR.[V]	1xBiotin [K3]	1	1	P98160	P98160 [4021-4028]	P98160 1xBiotin [K4023]	Basement membrane-specific heparan sulfate proteoglycan core protein OS=Homo sapiens OX=9606 GN=HSPG2 PE=1 SV=4	1	1128.58	3.527	0.852	2.956	1.82	-0.23	1.56	0.884583	0.999791	0.986776	1	1	1	40.4	72.2	71.6	142.5	61.5	211.7	190.3	28.2	32.1	57.4	44.8	180	195.1	31.5	56.9	86	113.3	149.5	36.9	48.9	152.7	38.3	189.7	168.3	11790.4	1746.49	1991.5	3559.91
[K].NVGKVLLVPGPEK.[E]	1xBiotin [K4]	3	6	Q99536	Q99536 [379-391]	Q99536 1xBiotin [K382]	Synaptic vesicle membrane protein VAT-1 homolog OS=Homo sapiens OX=9606 GN=VAT1 PE=1 SV=2	1	1575.89	0.501	0.851	0.575	-1	-0.23	-0.8	0.00911158	0.353527	0.0210753	0.062061	1	0.131475	127.5	118.1	120.7	63.9	100.5	69.3	101.3	127.3	142	118	117.9	116	111.4	165.6	120.4	58.4	63.7	70.1	61	103.9	100.3	69.2	88.7	64.5	9384.09	11784.6	13152.6	10927.2
[R].LDVPQNLMFGKWK.[Y]	1xBiotin [K11]; 1xOxidation [M8]	3	1	Q13740	Q13740 [45-57]	Q13740 1xBiotin [K55]	CD166 antigen OS=Homo sapiens OX=9606 GN=ALCAM PE=1 SV=2	1	1817.91	1.36	0.85	1.086	0.44	-0.23	0.12	0.999998	0.999973	0.831186	1	1	1	85.8	118	85.9	116.7	100.3	93.3	83	114.6	77	117.6	88.4	114.2	98.5	83.2	48.2	48.6	122	112.9	155.9	97.1	91.7	188.1	90.3	68.9	2705.58	3733.69	2507.1	3831.22
[K].GFVVINQKGIDPFSLDALSK.[E]	1xBiotin [K8]	2	2	P40227	P40227 [288-307]	P40227 1xBiotin [K295]	T-complex protein 1 subunit zeta OS=Homo sapiens OX=9606 GN=CCT6A PE=1 SV=3	1	2374.25	1.035	0.848	0.757	0.05	-0.24	-0.4	0.969419	0.994738	0.913719	1	1	1	87.6	94.5	140.6	90.7	80.1	106.5	71.3	44.3	104.3	76.8	71.6	97.5	373.8	45	114.3	232.8	73.8	57.7	81.9	65.2	48	104.1	86.6	51.1	2582.65	1606.78	3780.82	2784.06
[K].HSSQTSNLAHKTYSLSSSFSSSSSTR.[K]	1xBiotin [K11]	1	2	O60563	O60563 [547-572]	O60563 1xBiotin [K557]	Cyclin-T1 OS=Homo sapiens OX=9606 GN=CCNT1 PE=1 SV=1	1	3000.38	1.679	0.847	0.255	0.75	-0.24	-1.97	0.985759	0.978616	0.387203	1	1	1	48.8	108.3	214.6	81.9	91.7	54.6	43.3	43.8	96.5	199.8	97.2	54.5	385.5	192.5	46.9	73.5	73.5	83.6	82.3	93.1	51.2	87.8	49	46.1	1856.58	1877.37	4136.6	8564.59
[K].SDFGKFVLSSGK.[F]	1xBiotin [K5]	1	1	P27797	P27797 [44-55]	P27797 1xBiotin [K48]	Calreticulin OS=Homo sapiens OX=9606 GN=CALR PE=1 SV=1	1	1497.74	0.28	0.842	0.423	-1.84	-0.25	-1.24	0.222441	0.961163	0.279592	0.87201	1	1	197.9	88.1	129.6	55.5	74.2	54.8	50.3	178.7	259.7	79.5	185.6	61.3	92.4	238.9	117	50.1	56.8	45.9	67	80.7	64.3	46.7	49.5	75.6	2421.18	8601.58	12500.4	3827.3
[R].SQFKGPAPR.[E]	1xBiotin [K4]	1	6	O15145	O15145 [26-34]	O15145 1xBiotin [K29]	Actin-related protein 2/3 complex subunit 3 OS=Homo sapiens OX=9606 GN=ARPC3 PE=1 SV=3	1	1213.61	0.654	0.842	0.608	-0.61	-0.25	-0.72	0.690236	0.852705	0.185091	1	1	0.755648	128.4	98.7	128.1	84	83.1	77.8	145.9	93.8	126	66.7	96.9	180.1	115.8	125.8	180.6	82.5	60.4	86.5	38.4	125.5	81.6	40.1	76.4	77.1	24582.5	15797.5	21228.7	11235.3
[R].ASEEHLKQHYIDLK.[D]	1xBiotin [K7]	2	1	P22392	P22392 [43-56]	P22392 1xBiotin [K49]	Nucleoside diphosphate kinase B OS=Homo sapiens OX=9606 GN=NME2 PE=1 SV=1	1	1936.96	0.384	0.839	0.333	-1.38	-0.25	-1.59	0.0339415	0.576729	0.0373161	0.197008	1	0.206709	173.6	69.5	174	66.7	58.3	57.9	245.2	157.3	127.4	190.8	45	63	191.5	155.5	157.6	60.4	65.4	35.4	64.9	30.3	52.8	52.5	45.3	59.6	14563.3	9339.9	7563.46	11331.1
[K].FGKHGGTIPIVPTAEFQDR.[I]	1xBiotin [K3]	3	6	P00367	P00367 [478-496]	P00367 1xBiotin [K480]	Glutamate dehydrogenase 1, mitochondrial OS=Homo sapiens OX=9606 GN=GLUD1 PE=1 SV=2	1	2296.15	0.325	0.837	0.192	-1.62	-0.26	-2.38	0.802075	0.99672	0.685727	1	1	1	150.5	59	245	49	49.4	47.2	246.8	33.3	94.1	171.6	22	36.9	682.4	153.2	17.9	42.1	30.6	25.6	63	22.5	30.9	77.2	29.5	20.2	19847.2	2681.34	7570.86	13802.6
[R].GLDIPSIKTVINYDVAR.[D]	1xBiotin [K8]	2	2	Q86XP3	Q86XP3 [561-577]	Q86XP3 1xBiotin [K568]	ATP-dependent RNA helicase DDX42 OS=Homo sapiens OX=9606 GN=DDX42 PE=1 SV=1	1	2100.12	1.327	0.836	1.149	0.41	-0.26	0.2	0.433055	0.99955	0.998956	1	1	1	74.5	102.9	110.6	98.9	86.1	127	51	83.7	65.3	49	90.3	91.9	134.9	94.4	96.9	253.4	75.6	86.7	100.8	70.8	75.5	184.1	84.3	111.3	1616.96	2655.33	2073.04	1554.87
[R].QSILILKEQIQK.[S]	1xBiotin [K7]	3	1	P33240	P33240 [561-572]	P33240 1xBiotin [K567]	Cleavage stimulation factor subunit 2 OS=Homo sapiens OX=9606 GN=CSTF2 PE=1 SV=1	1	1666.96	1.181	0.835	0.661	0.24	-0.26	-0.6	0.999916	0.847238	0.705681	1	1	1	76.3	111.9	137.3	90.1	93.4	90.8	206.2	46.2	67.5	215.9	71.3	99.1	179.7	91.2	121.5	66.7	95.9	79.8	82.7	63.3	83.8	58.1	80.4	90.9	7509.04	1680.79	2459.53	7859.95
[R].HEMLPEFYKTVSPALISR.[F]	1xBiotin [K9]	3	2	Q86VP6	Q86VP6 [365-382]	Q86VP6 1xBiotin [K373]	Cullin-associated NEDD8-dissociated protein 1 OS=Homo sapiens OX=9606 GN=CAND1 PE=1 SV=2	1	2344.18	1.418	0.834	1.124	0.5	-0.26	0.17	0.959595	0.999135	0.982416	1	1	1	83	90.3	110	117.7	75.3	123.6	62.1	66.1	91	98.5	58.3	72	94.4	87.7	47.3	236.2	93.8	57.2	248.1	60	46.9	236.2	98.5	45.8	2350.86	2504.18	3445.27	3729.57
[R].VIACDGGGGALGHPKVYINLDK.[E]	1xBiotin [K15]; 1xCarbamidomethyl [C4]	1	1	O75380	O75380 [84-105]	O75380 1xBiotin [K98]	NADH dehydrogenase [ubiquinone] iron-sulfur protein 6, mitochondrial OS=Homo sapiens OX=9606 GN=NDUFS6 PE=1 SV=1	1	2480.24	0.376	0.826	0.182	-1.41	-0.28	-2.45	0.391405	0.633001	0.0340343	1	1	0.193017	173.2	77.4	186.4	65.2	63.9	34	348.6	38.6	123.9	277.3	51.9	55.3	319.4	128.6	133.3	46.6	27.9	48.2	53.2	25.4	45.7	24.3	20.7	31.1	24273.6	2687.98	8623.27	19304.5
[K].VISDFKK.[K]	1xBiotin [K]	2	5	Q86XP3	Q86XP3 [540-546]	Q86XP3 1xBiotin [K]	ATP-dependent RNA helicase DDX42 OS=Homo sapiens OX=9606 GN=DDX42 PE=1 SV=1	1	1062.57	0.495	0.819	1.31	-1.01	-0.29	0.39	0.151007	0.95687	0.879562	0.635945	1	1	127.1	94.3	103.2	62.9	77.2	135.2	139.1	68	140.6	79.9	103.2	107.1	91.3	113	114.4	68.9	46	80.9	84.5	69.5	90.4	155.8	147.9	99.6	21419.3	10469.1	21643.4	12296.6
[K].AVTKYTSSK.[-L]	1xBiotin [K4]	14	6	Q16778; P58876	Q16778 [118-126]; P58876 [118-126]	Q16778 1xBiotin [K121]; P58876 1xBiotin [K121]	Histone H2B type 2-E OS=Homo sapiens OX=9606 GN=H2BC21 PE=1 SV=3 Histone H2B type 1-D OS=Homo sapiens OX=9606 GN=H2BC5 PE=1 SV=2	1	1210.61	1.065	0.819	0.694	0.09	-0.29	-0.53	0.995274	0.998541	0.999994	1	1	1	91	110.4	124.8	96.9	90.4	86.6	21.8	159.6	99.8	25.1	121.1	139.6	25.6	165.6	136.9	92.1	106.3	112.5	99.1	13.7	127.3	36.7	222.2	95	2400.07	17579.9	10989.8	2764.67
[K].ETQKSIYYITGESK.[E]	1xBiotin [K4]	1	12	P08238	P08238 [478-491]	P08238 1xBiotin [K481]	Heat shock protein HSP 90-beta OS=Homo sapiens OX=9606 GN=HSP90AB1 PE=1 SV=4	1	1872.9	0.416	0.814	0.297	-1.26	-0.3	-1.75	0.0028876	0.518077	0.000514951	0.0226762	1	0.00541913	109.4	102.3	200.1	45.6	83.2	59.5	95.8	107.8	165.9	146.9	84.4	100.8	197.2	131.8	222.1	44.9	57.4	39.4	64.3	82	88.5	60.8	51.5	58.6	10131.5	11403.8	17544.7	15532.7
[K].VPKTAENFR.[A]	1xBiotin [K3]	1	2	P62937	P62937 [29-37]	P62937 1xBiotin [K31]	Peptidyl-prolyl cis-trans isomerase A OS=Homo sapiens OX=9606 GN=PPIA PE=1 SV=2	1	1287.65	6.213	0.804	1.87	2.64	-0.31	0.9	0.886586	1	0.993671	1	1	1	20.5	122.9	80.4	127.1	98.8	150.3	17.6	82.5	20.3	82.7	144.8	121.8	79.7	75.2	120.6	9.7	125.9	185.6	97.9	159.3	84.5	84.9	148.9	158.2	3496.03	16362.4	4020.02	16399.4
[K].VDENGKISR.[L]	1xBiotin [K6]	1	1	P62979	P62979 [108-116]	P62979 1xBiotin [K113]	Ubiquitin-40S ribosomal protein S27a OS=Homo sapiens OX=9606 GN=RPS27A PE=1 SV=2	1	1243.61	0.615	0.801	0.705	-0.7	-0.32	-0.5	0.259505	0.974748	0.941284	0.959664	1	1	124.4	103.7	124.6	76.5	83	87.9	73.2	578.2	92.6	77.2	94.7	72.8	92.8	64.8	108.1	57	41	81.4	47.5	70.2	61.8	36.8	84.3	65.4	50651.3	399903	64052.7	53384.5
[R].EVALDLSQHKGVAVR.[R]	1xBiotin [K10]	2	7	O00391	O00391 [202-216]	O00391 1xBiotin [K211]	Sulfhydryl oxidase 1 OS=Homo sapiens OX=9606 GN=QSOX1 PE=1 SV=3	1	1847.98	0.563	0.791	0.84	-0.83	-0.34	-0.25	0.92383	1	0.968558	1	1	1	134.3	110.9	104.1	75.6	87.7	87.4	46.3	147.4	141.3	52.7	116.7	141.5	84.2	165.5	109.6	45.2	97	79.6	69.1	147.7	92.3	78.7	92	93.3	3303.65	10516.7	10077.8	3755.77
[K].EITALAPSTMKIK.[I]	1xBiotin [K]	7	35	P60709	P60709 [316-328]	P60709 1xBiotin [K]	Actin, cytoplasmic 1 OS=Homo sapiens OX=9606 GN=ACTB PE=1 SV=1	1	1628.88	0.563	0.778	0.673	-0.83	-0.36	-0.57	0.0471614	0.611777	0.141695	0.256981	1	0.60933	131.9	104.6	124.2	74.2	81.4	83.6	91.1	132.9	163.9	105.4	106.8	100.3	125.1	101.7	163	62.4	74.8	80.6	102.1	82	61.5	84.3	72.3	89.8	68095.1	99336.3	122473	78769.5
[R].GKLLATQTAAELSK.[N]	1xBiotin [K2]	1	7	P56181-2	P56181-2 [65-78]	P56181-2 1xBiotin [K66]	Isoform 2 of NADH dehydrogenase [ubiquinone] flavoprotein 3, mitochondrial OS=Homo sapiens OX=9606 GN=NDUFV3	1	1656.9	0.224	0.777	0.864	-2.16	-0.36	-0.21	0.596854	0.942075	0.937432	1	1	1	256.5	79.4	77.7	57.5	61.7	67.2	198.2	277	36.9	24	417	61.4	266.2	60	46.5	31.5	44.4	47.5	53.3	47.7	37.5	67.5	51.9	31.6	11613	16227.2	2159.55	1408.53
[R].ICEVRPCGQPVYSSLKK.[G]	1xBiotin [K]; 2xCarbamidomethyl [C2; C7]	1	17	O00622	O00622 [266-282]	O00622 1xBiotin [K]	CCN family member 1 OS=Homo sapiens OX=9606 GN=CCN1 PE=1 SV=1	1	2247.11	1.423	0.775	1.465	0.51	-0.37	0.55	0.787284	1	0.635254	1	1	1	78.8	136.8	67.5	112	106	98.9	11.4	83	91.4	249.8	44.9	144.2	8.4	86.6	71.2	153.2	63.8	118.1	109.4	111.7	131.1	124.9	92.5	104.3	3263.11	23782.6	26184.4	71537.3
[K].VGIVGKYGTR.[Y]	1xBiotin [K6]	1	8	P61513	P61513 [8-17]	P61513 1xBiotin [K13]	60S ribosomal protein L37a OS=Homo sapiens OX=9606 GN=RPL37A PE=1 SV=2	1	1275.69	0.393	0.774	0.642	-1.35	-0.37	-0.64	0.0372916	0.79901	0.335893	0.211848	1	1	128.9	115.3	131.6	50.6	89.2	84.4	147.3	98.1	122.7	129	109.7	96.5	125.2	113.8	190.9	50.1	48.2	48.1	54	84.9	112.4	46	80.4	142.5	21157.9	14094	17617.5	18525.5
[K].KAVSPENMVTFSENHGVVIQPAYK.[D]	1xBiotin [K1]	3	2	P41217	P41217 [68-91]	P41217 1xBiotin [K68]	OX-2 membrane glycoprotein OS=Homo sapiens OX=9606 GN=CD200 PE=1 SV=4	1	2871.42	1.468	0.767	1.32	0.55	-0.38	0.4	0.440823	0.952346	0.734695	1	1	1	97	97.6	81.1	142.4	74.9	107.1	92.1	71.8	95.4	112	89.9	92.7	59.2	93.2	77.1	245.3	135.3	75.2	71.1	101	70.7	88.3	128.1	101.8	2561.65	1996.43	2652.88	3113.01
[K].EPISVSSEQVLKFR.[K]	1xBiotin [K12]	1	1	P00918	P00918 [213-226]	P00918 1xBiotin [K224]	Carbonic anhydrase 2 OS=Homo sapiens OX=9606 GN=CA2 PE=1 SV=2	1	1844.96	2.183	0.767	1.506	1.13	-0.38	0.59	0.521151	1	0.955583	1	1	1	55.2	106.1	94.5	120.6	81.3	142.3	45.3	110.5	51.3	107.5	98.6	47.3	80.6	97.1	87.8	112.1	157.8	111.8	45.9	75.6	137.7	132.3	55.6	245.1	1612.63	3935.48	1829.33	3830.08
[R].VVVDALSGLKGDLAGR.[Y]	1xBiotin [K10]	2	7	P12532	P12532 [190-205]	P12532 1xBiotin [K199]	Creatine kinase U-type, mitochondrial OS=Homo sapiens OX=9606 GN=CKMT1A PE=1 SV=1	1	1795.97	0.595	0.76	0.564	-0.75	-0.4	-0.83	0.98597	0.950633	0.85093	1	1	1	143.5	101.7	122.8	85.4	77.3	69.3	311.7	16.1	51.2	142.1	26.6	36.3	840.2	43.8	23.1	49.7	30.5	29.3	27.6	34.2	13.6	82.2	24.7	17.2	35120.2	1815.96	5767.03	16005.9
[K].AVEHINKTIAPALVSK.[K]	1xBiotin [K7]	1	55	P06733	P06733 [65-80]	P06733 1xBiotin [K71]	Alpha-enolase OS=Homo sapiens OX=9606 GN=ENO1 PE=1 SV=2	1	1917.06	0.696	0.759	0.755	-0.52	-0.4	-0.41	0.0145918	0.692074	0.176267	0.0941066	1	0.724051	123.1	113	109.6	85.8	85.7	82.8	161.5	114.2	119	115.2	109.1	95.1	98.7	113.8	105.9	91.9	76.4	82.9	81.9	109.6	82.8	70	80	92	174435	123294	128489	124426
[K].ENQKHIYYITGETK.[D]	1xBiotin [K4]	2	2	P07900	P07900 [486-499]	P07900 1xBiotin [K489]	Heat shock protein HSP 90-alpha OS=Homo sapiens OX=9606 GN=HSP90AA1 PE=1 SV=5	1	1949.94	0.212	0.758	0.307	-2.23	-0.4	-1.71	0.0267391	0.821056	0.15199	0.157876	1	0.646199	142.9	109.3	179.6	30.4	82.8	55.1	126.5	147.9	148.3	113.1	161	92.1	74	203.7	185.8	28.6	31.4	48.9	31.5	160.5	85.7	57	38.3	65.7	12982.6	15171.5	15212	11605.6
[K].TAIGKAGYTDK.[V]	1xBiotin [K5]	2	13	P06733	P06733 [229-239]	P06733 1xBiotin [K233]	Alpha-enolase OS=Homo sapiens OX=9606 GN=ENO1 PE=1 SV=2	1	1350.67	1.516	0.741	1.054	0.6	-0.43	0.08	0.989634	1	0.738159	1	1	1	71.5	139.8	86.1	108.4	103.6	90.7	73.5	73.4	106	43.7	143.7	205.7	13.4	88.5	93.7	83.9	111.5	146	95.3	106.5	118.6	65.3	138	93.3	15007.2	14982.2	21632.4	8928.22
[R].GDGTGGKSIYGER.[F]	1xBiotin [K7]	1	16	P23284	P23284 [110-122]	P23284 1xBiotin [K116]	Peptidyl-prolyl cis-trans isomerase B OS=Homo sapiens OX=9606 GN=PPIB PE=1 SV=2	1	1522.7	0.876	0.739	0.639	-0.19	-0.44	-0.65	0.999581	0.967446	0.427892	1	1	1	97.3	131.2	115.5	85.2	96.9	73.9	82.7	82.1	83.8	106.7	119.7	111.5	317.7	74	98.2	69.4	83.3	72.5	82.4	122.1	64.4	40.4	126.1	62.8	17788.2	17651	18016.1	22946.8
[R].KFLDGIYVSEK.[G]	1xBiotin [K1]	1	13	P32969	P32969 [174-184]	P32969 1xBiotin [K174]	60S ribosomal protein L9 OS=Homo sapiens OX=9606 GN=RPL9 PE=1 SV=1	1	1524.78	0.571	0.734	0.676	-0.81	-0.45	-0.57	0.356029	0.999258	0.701023	1	1	1	159.2	92.5	113.2	90.9	67.8	76.5	165.6	150.9	147.8	199.3	87.6	30.8	107.3	103.4	139.8	86.1	57.9	88.3	63.6	64.3	93.1	58.5	83.5	72.5	14621	13325.1	13047.5	17596.5
[K].NASTVVVSDKYNLKPIPLK.[R]	1xBiotin [K10]	1	1	Q96QC0	Q96QC0 [226-244]	Q96QC0 1xBiotin [K235]	Serine/threonine-protein phosphatase 1 regulatory subunit 10 OS=Homo sapiens OX=9606 GN=PPP1R10 PE=1 SV=1	1	2312.27	1.005	0.727	1.593	0.01	-0.46	0.67	0.999382	0.998916	1	1	1	1	123.2	84.2	80	123.9	61.2	127.4	104.2	119.9	80.5	71.3	64.6	113.6	226	67.6	62.9	104.8	102.5	131.8	51.7	133.3	51.8	67.5	107.7	138.3	3023.82	3479.56	2336.39	2067.11
[R].IVAPGKGILAADESTGSIAK.[R]	1xBiotin [K6]	2	70	P04075	P04075 [23-42]	P04075 1xBiotin [K28]	Fructose-bisphosphate aldolase A OS=Homo sapiens OX=9606 GN=ALDOA PE=1 SV=2	1	2124.14	0.48	0.725	0.287	-1.06	-0.46	-1.8	0.0951547	0.775951	0.02321	0.458597	1	0.141486	127.7	102.8	181.5	61.3	74.6	52.1	160.4	104.4	122.7	199.5	53.6	98.8	191.4	174.4	136.1	75.3	58.9	37.9	71.7	74.6	65.6	50	47.2	77.4	220503	143490	168710	274273
[K].ANKITITNDK.[G]	1xBiotin [K3]	3	12	P0DMV9	P0DMV9 [498-507]	P0DMV9 1xBiotin [K500]	Heat shock 70 kDa protein 1B OS=Homo sapiens OX=9606 GN=HSPA1B PE=1 SV=1	1	1343.7	0.54	0.723	0.702	-0.89	-0.47	-0.51	0.25428	0.926319	0.76165	0.950878	1	1	128.8	112.6	122	69.6	81.4	85.7	76.4	127.7	223.8	111.7	119.7	93.4	78.2	128.7	121	69	62	91.4	68.2	112.8	80.8	58.1	85	91.9	7735.98	12929.9	22656.2	11303.3
[R].AMKTVFGVEPDLTR.[E]	1xBiotin [K3]; 1xOxidation [M2]	2	7	Q96KP4	Q96KP4 [400-413]	Q96KP4 1xBiotin [K402]	Cytosolic non-specific dipeptidase OS=Homo sapiens OX=9606 GN=CNDP2 PE=1 SV=2	1	1805.89	0.218	0.72	0.263	-2.2	-0.47	-1.93	0.0589258	0.805608	0.085353	0.31341	1	0.408364	208.4	86.3	156.6	45.5	62.1	41.2	365.9	98.7	201.3	178.7	83.4	27.5	113.3	151.4	187.2	43.9	55.1	37.5	20.9	60	61.1	39.8	33.5	40.7	24769.2	6680.5	13629.5	12095.7
[K].DKYVGVSSDSVGGFR.[Y]	1xBiotin [K2]	3	4	Q14677	Q14677 [157-171]	Q14677 1xBiotin [K158]	Clathrin interactor 1 OS=Homo sapiens OX=9606 GN=CLINT1 PE=1 SV=1	1	1798.84	0.475	0.719	0.301	-1.08	-0.48	-1.73	0.469434	0.839865	0.0428838	1	1	0.235596	101.2	81.6	238.6	48	58.7	71.9	40.7	84.5	195.8	68.2	134.2	64.8	148.2	199.3	369.6	35.3	61	40.1	78.7	49	41.9	60	75.4	53.1	1739.02	3613.33	8371.16	2915.22
[R].LEKQSR.[L]	1xBiotin [K3]	2	5	P29279	P29279 [230-235]	P29279 1xBiotin [K232]	CCN family member 2 OS=Homo sapiens OX=9606 GN=CCN2 PE=1 SV=2	1	986.509	3.256	0.713	1.396	1.7	-0.49	0.48	0.551592	0.999725	0.471108	1	1	1	18.4	222.2	58.9	59.9	158.5	82.2	80.2	18.4	12.7	227.8	222.2	94.3	14.2	80.9	58.9	54.9	59.9	80.8	158.6	122.8	160	74.3	82.2	196.8	15190.5	3486.7	2412.76	43154.2
[R].VIPGAAEKIER.[T]	1xBiotin [K8]	2	2	Q15019	Q15019 [67-77]	Q15019 1xBiotin [K74]	Septin-2 OS=Homo sapiens OX=9606 GN=SEPTIN2 PE=1 SV=1	1	1408.76	0.28	0.71	0.379	-1.83	-0.49	-1.4	0.00133632	0.584158	0.00795502	0.011291	1	0.0582861	162.4	112.5	144.7	45.5	79.9	54.9	159.1	143.7	174	84.3	144.6	110.2	141.8	109.1	158.6	44.6	44.1	71.3	61.1	78.3	104	41	76.4	53.8	11848.8	10698.7	12955.9	6280.23
[K].GFGYKGSCFHR.[I]	1xBiotin [K5]; 1xCarbamidomethyl [C8]	1	10	P62937	P62937 [45-55]	P62937 1xBiotin [K49]	Peptidyl-prolyl cis-trans isomerase A OS=Homo sapiens OX=9606 GN=PPIA PE=1 SV=2	1	1541.68	1.077	0.709	0.924	0.11	-0.5	-0.11	0.8828	0.969713	0.950011	1	1	1	81.4	108.5	127.6	87.7	76.9	117.9	87.2	75.2	147.4	71	116.3	131	136.6	107.1	149.6	27.7	93.9	97.9	43.6	82.4	117.3	39.9	149.8	126.2	26368.7	22734.2	44566.7	21455.7
[R].LVYLVENPGGYVAYSKAATVTGK.[L]	1xBiotin [K16]	1	1	P02786	P02786 [209-231]	P02786 1xBiotin [K224]	Transferrin receptor protein 1 OS=Homo sapiens OX=9606 GN=TFRC PE=1 SV=2	1	2626.36	1.963	0.708	0.615	0.97	-0.5	-0.7	0.580843	1	0.974308	1	1	1	59.9	120.8	133.9	117.6	85.4	82.3	51.7	40.7	87.5	59	107.4	104.2	138.8	100.3	115.6	195.9	77	101.5	177.1	73.7	47	208.6	71	42.8	1810.59	1425.71	3063.24	2065.25
[K].LLQKGIHPTIISESFQK.[A]	1xBiotin [K4]	2	15	P50991	P50991 [123-139]	P50991 1xBiotin [K126]	T-complex protein 1 subunit delta OS=Homo sapiens OX=9606 GN=CCT4 PE=1 SV=4	1	2165.18	0.278	0.692	0.237	-1.85	-0.53	-2.08	0.166336	0.934897	0.082576	0.685366	1	0.396543	122	107.3	212.3	33.9	74.2	50.2	299	85.7	106.2	191.3	51.2	93.3	193.8	184.7	130.3	86.3	29.5	19.8	64.6	30.1	116.4	56	18	43.7	99008.4	28397.5	35160.5	63343.3
[K].AFSIGKMSTAK.[R]	1xBiotin [K6]; 1xOxidation [M7]	2	1	O15042	O15042 [83-93]	O15042 1xBiotin [K88]	U2 snRNP-associated SURP motif-containing protein OS=Homo sapiens OX=9606 GN=U2SURP PE=1 SV=2	1	1382.68	0.296	0.688	0.332	-1.75	-0.54	-1.59	0.147567	0.617814	0.0822156	0.625507	1	0.396238	196.8	92.7	141.4	58.3	63.8	46.9	70.7	257.5	198.5	93.5	153.3	65.5	142.5	178.2	135.8	67.9	44.2	58.8	83.2	64.3	29.5	47.3	79.8	29.6	3541.79	12894.2	9938.03	4681.49
[K].AATALKDVVK.[V]	1xBiotin [K6]	5	16	Q15084	Q15084 [68-77]	Q15084 1xBiotin [K73]	Protein disulfide-isomerase A6 OS=Homo sapiens OX=9606 GN=PDIA6 PE=1 SV=1	1	1241.69	0.513	0.677	0.785	-0.96	-0.56	-0.35	0.0921793	0.297843	0.714641	0.447488	0.895543	1	138.9	128.3	97.9	71.2	86.8	76.8	130	182.2	122.7	142.5	120.1	103.7	118.9	87.3	91.6	56.6	66.7	119	89.4	81.3	61.1	53.8	101.2	71.9	22384	31376.8	21131.4	24532.3
[R].EELKHFEAKIEK.[H]	2xBiotin [K4; K9]	1	4	P30533	P30533 [279-290]	P30533 2xBiotin [K282; K287]	Alpha-2-macroglobulin receptor-associated protein OS=Homo sapiens OX=9606 GN=LRPAP1 PE=1 SV=1	2	1952.96	0.531	0.674	1.122	-0.91	-0.57	0.17	0.680898	0.788407	0.929793	1	1	1	158.9	107.7	83.1	84.4	72.6	93.3	368.6	51.5	34.7	356.9	34.9	28.1	655.2	18.7	26.9	27.3	29.5	13.2	23.5	28	14.9	24.9	30.2	32.7	39945	5580.77	3764.29	38672.5
[R].TLLIKTVETR.[D]	1xBiotin [K5]	1	22	P08670	P08670 [441-450]	P08670 1xBiotin [K445]	Vimentin OS=Homo sapiens OX=9606 GN=VIM PE=1 SV=4	1	1399.8	0.49	0.67	0.719	-1.03	-0.58	-0.48	0.0100313	0.106724	0.285372	0.0672956	0.450232	1	144.4	111.3	115.7	70.8	74.6	83.2	115.8	184.9	132.2	102	185.9	88.9	97.6	141.3	106	61.2	64.9	73.7	67.5	79.5	68.3	84.5	76.3	69.5	37890.4	60510.2	43279.3	33368.9
[-].MSSGNAKIGHPAPNFK.[A]	1xBiotin [K7]; 1xMet-loss+Acetyl [N-Term]	1	17	Q06830	Q06830 [1-16]	Q06830 1xBiotin [K7]; 1xMet-loss+Acetyl [N-Term]	Peroxiredoxin-1 OS=Homo sapiens OX=9606 GN=PRDX1 PE=1 SV=1	1	1792.88	1.517	0.669	0.848	0.6	-0.58	-0.24	0.910155	0.690183	0.999996	1	1	1	87.8	113.6	102.5	133.2	76	86.9	85.7	84.4	109.6	97	110.7	114.2	99.9	77.7	117.9	182	66.1	129.9	59.8	102	74.1	81.4	122.8	84.7	15966.6	15726.1	20436.3	18083.1
[R].KSTDSPVECMGQEK.[G]	1xBiotin [K1]; 1xCarbamidomethyl [C9]	1	34	P13726	P13726 [233-246]	P13726 1xBiotin [K233]	Tissue factor OS=Homo sapiens OX=9606 GN=F3 PE=1 SV=1	1	1821.78	0.794	0.667	0.92	-0.33	-0.58	-0.12	0.995941	0.329478	1	1	0.96884	1	96.9	148.2	93.4	76.9	98.8	85.9	58.6	103.2	93.2	157.4	142.6	125.1	87.4	123.3	89.9	68.8	74	80.3	95.1	98.7	72.2	67.8	82.7	179.5	27550.1	48511.1	43845.2	74028.5
[R].GTAKANVGAGK.[K]	1xBiotin [K4]	4	2	P62847; P62847-4	P62847 [119-129]; P62847-4 [119-129]	P62847 1xBiotin [K122]; P62847-4 1xBiotin [K122]	40S ribosomal protein S24 OS=Homo sapiens OX=9606 GN=RPS24 PE=1 SV=1 Isoform 4 of 40S ribosomal protein S24 OS=Homo sapiens OX=9606 GN=RPS24	1	1199.62	0.372	0.658	0.434	-1.43	-0.6	-1.2	0.0206822	0.179321	0.0114927	0.124373	0.62833	0.0799104	138.1	122.4	144.7	51.3	80.6	62.8	138.3	128.6	108.9	195.8	114	111.3	134.7	129.1	161.5	47.8	43.7	71.3	50.7	119.7	75	43.3	58.5	67.8	18548.9	17240.6	14598.1	26261.3
[K].VEAKFINYVK.[N]	1xBiotin [K4]	2	6	P06748	P06748 [264-273]	P06748 1xBiotin [K267]	Nucleophosmin OS=Homo sapiens OX=9606 GN=NPM1 PE=1 SV=2	1	1436.76	0.673	0.657	0.744	-0.57	-0.61	-0.43	0.194721	0.631161	0.558877	0.782991	1	1	134.5	114.9	105.8	90.5	75.5	78.8	93.9	200.3	125.9	107.5	94.4	129.5	121.5	96.8	99.1	94.4	70.2	84.8	70.7	111.5	67.9	73.7	62.9	95	8912.02	19000.2	11946.1	10200.3
[R].SKGQESFK.[K]	1xBiotin [K2]	2	5	P06748	P06748 [222-229]	P06748 1xBiotin [K223]	Nucleophosmin OS=Homo sapiens OX=9606 GN=NPM1 PE=1 SV=2	1	1136.54	1.006	0.656	0.902	0.01	-0.61	-0.15	0.998439	0.719911	0.938421	1	1	1	101.4	122.2	102.1	102.1	80.2	92	86	168.4	93	122.8	108.3	112	58.2	175.5	93.6	121.1	87.2	93.5	69	96.7	73.5	53.9	103.3	84.3	10779.7	21110.6	11654.5	15391.5
[R].KTSYAQHQQVR.[Q]	1xBiotin [K1]	1	1	P61247	P61247 [152-162]	P61247 1xBiotin [K152]	40S ribosomal protein S3a OS=Homo sapiens OX=9606 GN=RPS3A PE=1 SV=2	1	1571.77	0.76	0.652	0.943	-0.4	-0.62	-0.08	0.801833	0.987889	0.970386	1	1	1	90.8	151	98.1	69	98.4	92.6	421.1	73.6	37.4	193.9	122.3	70.5	73.3	79.5	103.2	66.8	41.2	55.9	100.1	78.1	79.8	22.6	105.8	75	32756.7	5724.81	2912.48	15082.5
[K].EKYIDQEELNK.[T]	1xBiotin [K2]	5	13	P07900; P08238	P07900 [282-292]; P08238 [274-284]	P07900 1xBiotin [K283]; P08238 1xBiotin [K275]	Heat shock protein HSP 90-alpha OS=Homo sapiens OX=9606 GN=HSP90AA1 PE=1 SV=5 Heat shock protein HSP 90-beta OS=Homo sapiens OX=9606 GN=HSP90AB1 PE=1 SV=4	1	1634.77	0.781	0.651	0.663	-0.36	-0.62	-0.59	0.26862	0.00381242	0.0325529	0.985186	0.0292505	0.18732	119.8	111.9	121.3	93.6	72.9	80.5	120.4	102.7	144.6	112.5	133.5	108.8	122	135.2	100	94.1	85	101.9	53.9	77	73.3	70.9	80.9	83.2	16662.8	14211.5	20005.9	15562.2
[R].QYAKDIGFIK.[LK]	1xBiotin [K4]	2	16	P62273	P62273 [45-54]	P62273 1xBiotin [K48]	40S ribosomal protein S29 OS=Homo sapiens OX=9606 GN=RPS29 PE=1 SV=2	1	1408.73	0.215	0.643	0.261	-2.22	-0.64	-1.94	0.00884381	0.146326	0.0137517	0.0605461	0.544137	0.0927199	166.7	127.5	149.1	35.8	82	38.9	140.3	169.2	102.9	387.7	107.4	97.2	136.2	106.6	125.5	51.2	28.8	30.2	69	76.4	65.2	32.7	28.8	44.7	56279.6	67888.1	41276.7	155537
[K].VFSGKSER.[S]	1xBiotin [K5]	2	3	P14866	P14866 [534-541]	P14866 1xBiotin [K538]	Heterogeneous nuclear ribonucleoprotein L OS=Homo sapiens OX=9606 GN=HNRNPL PE=1 SV=2	1	1135.56	0.072	0.634	0.131	-3.8	-0.66	-2.93	0.527513	0.870023	0.733993	1	1	1	294.3	29.5	209	21.1	18.7	27.4	482.3	314	14.4	211	29.5	31.4	253.9	222.9	15.3	38.5	22.5	19.5	17.3	19.9	26.5	32.4	19.5	29.2	49416.2	32168.6	1471.81	21624.1
[K].ISDSEGFKANLSLLR.[R]	1xBiotin [K8]	2	3	P23246	P23246 [272-286]	P23246 1xBiotin [K279]	Splicing factor, proline- and glutamine-rich OS=Homo sapiens OX=9606 GN=SFPQ PE=1 SV=2	1	1875.96	0.923	0.627	0.594	-0.11	-0.67	-0.75	0.793258	0.79772	0.624334	1	1	1	94.1	122.4	137.9	86.9	76.7	81.9	444.9	54.5	40.8	214.4	48.5	70.9	373.7	63.5	79.9	50.4	32.1	56.9	44.5	32.1	48.9	63.9	32.8	47.5	22327	2736.52	2045.86	10761.2
[R].EESGKPGAHVTVKK.[L]	1xBiotin [K13]	2	2	P22626	P22626 [100-113]	P22626 1xBiotin [K112]	Heterogeneous nuclear ribonucleoproteins A2/B1 OS=Homo sapiens OX=9606 GN=HNRNPA2B1 PE=1 SV=2	1	1692.87	1.712	0.625	1.648	0.78	-0.68	0.72	0.788423	0.915695	0.943762	1	1	1	49.3	180.9	65.1	84.4	113	107.3	31.3	104	40.7	63.1	329.8	149.5	33	53.8	92.4	55	69.7	232	109.6	71	93.4	52.3	130.9	88.6	2105.39	7001.35	2741.33	4249.99
[R].TTINKNAR.[A]	1xBiotin [K5]	3	1	P46779	P46779 [80-87]	P46779 1xBiotin [K84]	60S ribosomal protein L28 OS=Homo sapiens OX=9606 GN=RPL28 PE=1 SV=3	1	1143.59	1.994	0.618	0.633	1	-0.69	-0.66	0.999988	0.877675	0.999933	1	1	1	49.2	152.7	126	98	94.4	79.7	47	46.3	154.8	146	204.9	104.6	38.5	120.4	157	35.4	93.7	122.2	90.2	100.1	85.5	65.6	111.7	76.2	2157.48	2125.09	7108.95	6701.07
[R].LTAMKAAFQSQYK.[S]	1xBiotin [K5]; 1xOxidation [M4]	2	1	Q86XP3	Q86XP3 [696-708]	Q86XP3 1xBiotin [K700]	ATP-dependent RNA helicase DDX42 OS=Homo sapiens OX=9606 GN=DDX42 PE=1 SV=1	1	1728.84	1.353	0.613	2.578	0.44	-0.71	1.37	0.999998	0.998103	0.973243	1	1	1	76.2	95.9	74.3	103.2	58.8	191.6	54.8	140.2	68.4	86.1	103.1	81.4	66.7	163.6	64.4	116.3	92.6	42.5	52.8	185.7	41.2	54.2	214.1	171.9	1973.92	5051.73	2465.17	3100.2
[K].TVPVEAVTSKTSNIR.[A]	1xBiotin [K10]	3	1	Q14247	Q14247 [337-351]	Q14247 1xBiotin [K346]	Src substrate cortactin OS=Homo sapiens OX=9606 GN=CTTN PE=1 SV=2	1	1827.96	0.558	0.604	0.443	-0.84	-0.73	-1.18	0.520194	0.805167	0.575846	1	1	1	124.4	137	129.1	69.5	82.8	57.2	523.9	32	75.6	336.6	48.9	83.2	178.7	78.4	69.6	42.2	44.5	24.9	56	50.3	46.8	47.2	26.4	34.7	38060.2	2327.17	5491.68	24458.4
[K].EITALAPSTMKIK.[I]	1xBiotin [K]; 1xOxidation [M10]	7	33	P60709	P60709 [316-328]	P60709 1xBiotin [K]	Actin, cytoplasmic 1 OS=Homo sapiens OX=9606 GN=ACTB PE=1 SV=1	1	1644.87	0.547	0.603	0.772	-0.87	-0.73	-0.37	0.145032	0.545702	0.805749	0.624853	1	1	134.6	125	108	73.6	75.4	83.3	135.4	118.3	134.6	106.6	132.6	125.1	71.4	108	144.8	55.6	73.6	88.5	56.5	133.7	75.4	62.8	93.7	83.3	75261.6	65760	74860.9	59265.9
[K].GTLLGESLKLK.[V]	1xBiotin [K]	2	31	O75663	O75663 [118-128]	O75663 1xBiotin [K]	TIP41-like protein OS=Homo sapiens OX=9606 GN=TIPRL PE=1 SV=2	1	1384.79	0.546	0.602	0.789	-0.87	-0.73	-0.34	0.00647867	0.0328506	0.324037	0.045762	0.182731	1	122.2	159.2	87.1	66.8	95.9	68.7	160.5	99.1	121.3	178.9	158	128.5	76.2	86.5	108.9	60.3	66.3	72.6	104	95.2	82.3	55.3	68.2	77.9	61667.4	38068.7	46615.4	68720.1
[R].SGGYSSGKQGR.[S]	1xBiotin [K8]	5	34	Q15084	Q15084 [143-153]	Q15084 1xBiotin [K150]	Protein disulfide-isomerase A6 OS=Homo sapiens OX=9606 GN=PDIA6 PE=1 SV=1	1	1309.6	0.641	0.599	0.861	-0.64	-0.74	-0.22	0.577698	0.106778	0.979837	1	0.450232	1	115.3	155.4	87.2	73.9	93.1	75.1	127.3	73.4	113.1	133.4	152.3	199.5	74.2	101.5	85.5	72.5	59	95.7	91.3	107.7	79.1	56.9	73.6	103.9	134643	77583	119603	141103
[K].ITITNDKGR.[L]	1xBiotin [K7]	6	8	P11142; P0DMV9	P11142 [501-509]; P0DMV9 [501-509]	P11142 1xBiotin [K507]; P0DMV9 1xBiotin [K507]	Heat shock cognate 71 kDa protein OS=Homo sapiens OX=9606 GN=HSPA8 PE=1 SV=1 Heat shock 70 kDa protein 1B OS=Homo sapiens OX=9606 GN=HSPA1B PE=1 SV=1	1	1243.65	0.716	0.596	0.768	-0.48	-0.75	-0.38	0.763459	0.448677	0.882578	1	1	1	96.8	150.8	109.4	69.3	89.8	83.9	95.8	89.2	173.8	82.6	149.3	153.4	77.5	108.3	140.6	68	68.6	113	49.2	98.9	88.9	65.5	94	83.1	19662.9	18309.9	35673	16949.2
[K].SGMKELAVFR.[E]	1xBiotin [K4]; 1xOxidation [M3]	1	3	P18065	P18065 [183-192]	P18065 1xBiotin [K186]	Insulin-like growth factor-binding protein 2 OS=Homo sapiens OX=9606 GN=IGFBP2 PE=1 SV=2	1	1379.68	0.32	0.595	0.598	-1.64	-0.75	-0.74	0.0502095	0.972484	0.288263	0.270281	1	1	164	144.4	95.9	52.4	85.9	57.3	125.6	170.7	206.3	150.4	168.2	39.5	92	164.6	99.9	62.9	54.6	53.1	91.1	89.5	60.6	46.4	59.7	64.9	6864.83	9333.9	11277.6	8221.33
[K].TKPIWTR.[N]	1xBiotin [K2]	6	2	P07900; P08238	P07900 [293-299]; P08238 [285-291]	P07900 1xBiotin [K294]; P08238 1xBiotin [K286]	Heat shock protein HSP 90-alpha OS=Homo sapiens OX=9606 GN=HSP90AA1 PE=1 SV=5 Heat shock protein HSP 90-beta OS=Homo sapiens OX=9606 GN=HSP90AB1 PE=1 SV=4	0	1127.6	0.412	0.583	0.617	-1.28	-0.78	-0.7	0.0418802	0.374028	0.288868	0.232958	1	1	149.9	122.5	120.3	61.7	71.4	74.2	201.3	118.3	135.4	110.7	146	105.1	84.9	108.6	156.6	54.2	55.8	88.3	64.5	108	56	46.4	92.8	67	63093.3	37069.4	42452.6	34690.6
[K].HNHYQKQLEIAHEK.[L]	1xBiotin [K6]	1	1	P30533	P30533 [291-304]	P30533 1xBiotin [K296]	Alpha-2-macroglobulin receptor-associated protein OS=Homo sapiens OX=9606 GN=LRPAP1 PE=1 SV=1	1	2000.98	0.109	0.577	0.207	-3.2	-0.79	-2.27	0.415107	0.688192	0.820352	1	1	1	275.9	54.7	172.3	30	31.6	35.6	39	323.5	233.4	28.6	433.1	46.3	18.2	145.8	253	48.2	22.1	25.4	26.7	18.4	34.8	48.6	30.1	24.9	3358.1	27860.2	20098.9	2463.17
[R].LDSQKHIDFSLR.[S]	1xBiotin [K5]	1	2	P46781	P46781 [151-162]	P46781 1xBiotin [K155]	40S ribosomal protein S9 OS=Homo sapiens OX=9606 GN=RPS9 PE=1 SV=3	1	1684.85	0.29	0.573	0.41	-1.79	-0.8	-1.29	0.00291066	0.120789	0.0241429	0.0227236	0.481353	0.145841	141.4	116.2	166.6	41	66.6	68.3	113.8	151.5	141.7	116.4	82.2	161.1	166.9	207.7	115	41	36.2	60.8	66.7	55	66.9	50.2	98.3	68.4	14697.6	19566.1	18294.1	15033.1
[K].DGKYSQVLANGLDNK.[L]	1xBiotin [K3]	1	7	P62269	P62269 [92-106]	P62269 1xBiotin [K94]	40S ribosomal protein S18 OS=Homo sapiens OX=9606 GN=RPS18 PE=1 SV=3	1	1847.9	0.266	0.573	0.194	-1.91	-0.8	-2.36	0.0104012	0.875834	0.00243066	0.0690825	1	0.020935	178.7	76.7	212.1	47.5	43.9	41.2	223.5	166.9	168.4	141	72.2	24.6	199.8	268.2	159	44.7	41.5	45.3	58	41.4	35	38.8	45	26.8	15642.8	11678.7	11783.6	9871.76
[K].ANEVISKLYAVHQEGNK.[N]	1xBiotin [K7]	3	4	P50990	P50990 [460-476]	P50990 1xBiotin [K466]	T-complex protein 1 subunit theta OS=Homo sapiens OX=9606 GN=CCT8 PE=1 SV=4	1	2126.07	0.793	0.571	0.748	-0.34	-0.81	-0.42	0.984186	0.615668	0.644985	1	1	1	115.4	116	120.6	91.4	66.3	90.3	193.9	72.2	50.2	400.3	35.6	72.5	371.1	69.3	75.5	56.9	57.2	67.3	50.5	41.4	28.4	30.7	70.4	56.5	10816.3	4024.81	2802.33	22327.9
[K].KILATPPQEDAPSVDIANIR.[M]	1xBiotin [K1]	2	13	P29401	P29401 [283-302]	P29401 1xBiotin [K283]	Transketolase OS=Homo sapiens OX=9606 GN=TKT PE=1 SV=3	1	2374.24	0.289	0.565	0.294	-1.79	-0.82	-1.77	0.42511	0.88614	0.278454	1	1	1	161.3	110.7	169.1	46.6	62.6	49.7	271.8	51.3	74.3	387.9	23.5	51	503.6	77.9	74.5	45.3	21.5	14.1	60.5	24.8	28.8	50.4	16.2	22.9	45865.2	8651.72	12536.9	65460.9
[K].FHYKTDQGIK.[N]	1xBiotin [K4]	1	21	P04040	P04040 [234-243]	P04040 1xBiotin [K237]	Catalase OS=Homo sapiens OX=9606 GN=CAT PE=1 SV=3	1	1462.71	1.374	0.563	1.41	0.46	-0.83	0.5	0.996461	0.769998	0.997585	1	1	1	74.5	125.4	94.2	102.4	70.6	132.8	56.8	64.6	127.8	59	108.8	245.3	61	81.7	147.9	72	88.8	125.9	61.2	116.4	48.2	70.9	148.7	115.1	47693.7	54285	107304	49586.9
[R].MEKLNQLWEK.[A]	1xBiotin [K3]	1	3	P30533	P30533 [56-65]	P30533 1xBiotin [K58]	Alpha-2-macroglobulin receptor-associated protein OS=Homo sapiens OX=9606 GN=LRPAP1 PE=1 SV=1	1	1544.76	0.629	0.558	0.466	-0.67	-0.84	-1.1	0.904038	0.251491	0.549016	1	0.791841	1	141.4	108.6	136.8	88.9	60.6	63.7	124	70.2	144.6	296.8	91.1	95.3	199.1	63.9	120	103.2	49.3	78	53.1	39.1	87.1	81	55.9	48.2	4971.76	2815.71	5794.75	11898.6
[K].EFDGKSLVSVTK.[E]	1xBiotin [K5]	3	3	P08238	P08238 [527-538]	P08238 1xBiotin [K531]	Heat shock protein HSP 90-beta OS=Homo sapiens OX=9606 GN=HSP90AB1 PE=1 SV=4	1	1535.78	0.458	0.553	0.365	-1.13	-0.85	-1.45	0.160795	0.977573	0.0856495	0.668536	1	0.408364	148.6	115.5	149.4	68.1	63.8	54.5	209.8	116.6	148.6	115.4	169.5	35.2	183.2	106.5	149.3	68.1	80.5	46.7	63.8	94.3	56.2	54.5	58.6	43.2	12295.6	6835.72	8708.91	6765.25
[R].KLESTESR.[S]	1xBiotin [K1]	6	2	P02545	P02545 [420-427]	P02545 1xBiotin [K420]	Prelamin-A/C OS=Homo sapiens OX=9606 GN=LMNA PE=1 SV=1	1	1175.57	0.606	0.548	0.694	-0.72	-0.87	-0.53	0.183098	0.336661	0.941174	0.747508	0.979176	1	128	130.2	113.8	77.6	71.4	79	303.4	94.6	111.9	155.2	113.7	107	68	99.4	112.1	67.8	47.1	103.4	48	62.3	95.1	62.6	79.2	69	26463.7	8253.75	9757.9	13543.2
[K].GVAYTLLTPKDSNFAGDLVR.[N]	1xBiotin [K10]	2	1	Q86XP3	Q86XP3 [596-615]	Q86XP3 1xBiotin [K605]	ATP-dependent RNA helicase DDX42 OS=Homo sapiens OX=9606 GN=DDX42 PE=1 SV=1	1	2363.21	1.328	0.545	1.101	0.41	-0.88	0.14	0.732246	0.981635	0.997996	1	1	1	75.8	108.1	122.1	100.7	58.9	134.4	64.3	55.4	53.9	78.9	81.5	70.8	176.2	66.6	89.2	349.8	49.9	73.5	106.9	43	39.4	214.9	87.6	98.2	2599.28	2238.36	2177.97	3190.81
[R].KNGFVVLK.[G]	1xBiotin [K1]	4	3	Q6IS14	Q6IS14 [27-34]	Q6IS14 1xBiotin [K27]	Eukaryotic translation initiation factor 5A-1-like OS=Homo sapiens OX=9606 GN=EIF5AL1 PE=2 SV=2	1	1130.64	0.438	0.544	0.447	-1.19	-0.88	-1.16	0.0899234	0.0898059	0.0163182	0.439735	0.398309	0.106788	136.7	135.5	134.1	59.9	73.7	60	96.6	141.3	142.3	140	175.1	127	76.7	169.3	138.6	80.5	57.4	61.9	70	85.9	76.2	34.7	62	64.2	13837.8	20231	20383.4	20056
[R].GTKVILHLK.[E]	1xBiotin [K3]	5	29	P07900; P08238	P07900 [183-191]; P08238 [178-186]	P07900 1xBiotin [K185]; P08238 1xBiotin [K180]	Heat shock protein HSP 90-alpha OS=Homo sapiens OX=9606 GN=HSP90AA1 PE=1 SV=5 Heat shock protein HSP 90-beta OS=Homo sapiens OX=9606 GN=HSP90AB1 PE=1 SV=4	1	1234.73	0.266	0.536	0.411	-1.91	-0.9	-1.28	0.00321884	0.0553142	0.0159184	0.024839	0.276229	0.104685	164.9	142.1	122.7	43.8	76.1	50.4	136.1	194.6	160.4	138.2	156.7	118.6	112.4	119.3	137.9	39.3	42.6	88	49.4	74	76.6	34.8	49	72	275120	393250	324078	279270
[K].LVLVGDGGTGKTTFVK.[R]	1xBiotin [K11]	1	19	P62826	P62826 [13-28]	P62826 1xBiotin [K23]	GTP-binding nuclear protein Ran OS=Homo sapiens OX=9606 GN=RAN PE=1 SV=3	1	1817.98	0.368	0.533	0.432	-1.44	-0.91	-1.21	0.00111415	0.0835427	0.00288012	0.009713	0.378066	0.0241821	151.6	128.3	136.9	55.8	68.3	59.2	138.3	188.5	148.5	162.2	79.8	125.7	145.8	123.9	134.1	70.5	54.6	50.4	66.9	91.9	53	49.3	58	58.5	18186.7	24778.3	19525.9	21321.8
[R].KTVGVEPAADGK.[G]	1xBiotin [K1]	5	9	P46779	P46779 [47-58]	P46779 1xBiotin [K47]	60S ribosomal protein L28 OS=Homo sapiens OX=9606 GN=RPL28 PE=1 SV=3	1	1397.71	0.52	0.516	0.673	-0.94	-0.95	-0.57	0.113533	0.445633	0.342844	0.526271	1	1	120.8	131.1	130.1	62.8	67.7	87.5	85.6	119.1	156.1	90	129.3	175.3	111.6	160.3	128.2	61.9	77.6	33.6	66.8	113.7	58.8	52.8	93	86.3	9898.43	13774.4	18058.7	10417.4
[K].GQEVSPKVYFMK.[Q]	1xBiotin [K]	1	32	P09936	P09936 [72-83]	P09936 1xBiotin [K]	Ubiquitin carboxyl-terminal hydrolase isozyme L1 OS=Homo sapiens OX=9606 GN=UCHL1 PE=1 SV=2	1	1638.8	0.434	0.516	0.515	-1.2	-0.96	-0.96	0.250516	0.247231	0.405688	0.949987	0.782508	1	126.3	138.4	138	54.8	71.4	71.1	80	188.5	119.8	93.5	173.8	131.3	127	137.4	130.8	52	83	46.8	51.2	68.1	67.7	36.6	67.4	145	28323.1	66690.7	42396.6	33095.4
[K].NIKLGIHEDSQNR.[K]	1xBiotin [K3]	2	6	P07900	P07900 [444-456]	P07900 1xBiotin [K446]	Heat shock protein HSP 90-alpha OS=Homo sapiens OX=9606 GN=HSP90AA1 PE=1 SV=5	1	1749.87	0.684	0.515	0.462	-0.55	-0.96	-1.12	0.0937923	0.112248	0.0539186	0.453669	0.461082	0.28564	104.8	155.9	128.2	71.7	80.3	59.2	100.4	91.8	187	152.8	149.4	140.4	94.6	122.9	141.4	40.8	68.7	91.5	76.9	96.6	69	51.6	67.5	56.7	8723.07	7973.76	16240.1	13270.5
[K].DYNVTANSKLVIITAGAR.[Q]	1xBiotin [K9]	4	2	P00338	P00338 [82-99]	P00338 1xBiotin [K90]	L-lactate dehydrogenase A chain OS=Homo sapiens OX=9606 GN=LDHA PE=1 SV=2	1	2132.12	0.726	0.513	1.553	-0.46	-0.96	0.64	0.738494	0.87725	0.999994	1	1	1	101.3	134.8	86.6	73.6	69.2	134.5	235.2	73.4	64.5	175.2	59.1	97.7	372.8	62.8	41.7	39.8	53.3	62.2	42.7	87.9	50.1	97.5	108.8	75.3	9040.33	2822.59	2477.87	6733.88
[K].GKGFSVVADTPELQR.[I]	1xBiotin [K2]	3	6	Q14847	Q14847 [95-109]	Q14847 1xBiotin [K96]	LIM and SH3 domain protein 1 OS=Homo sapiens OX=9606 GN=LASP1 PE=1 SV=2	1	1829.92	0.217	0.506	0.355	-2.2	-0.98	-1.5	0.844548	0.982766	0.964234	1	1	1	184.4	128.8	134	40.1	65.2	47.5	246.2	65.4	60.1	508.1	30.2	45.6	157.9	37.9	47.5	209.9	9.9	14.2	185.4	22.4	23.1	104.2	15.3	16.8	74009.6	19647.8	18082.7	152757
[K].AIHNKVNIVPVIAK.[A]	1xBiotin [K5]	3	52	Q15019	Q15019 [170-183]	Q15019 1xBiotin [K174]	Septin-2 OS=Homo sapiens OX=9606 GN=SEPTIN2 PE=1 SV=1	1	1742.01	0.383	0.506	0.362	-1.38	-0.98	-1.46	0.00257542	0.0965569	0.000721715	0.0204654	0.419881	0.00719022	150.6	123.2	151.3	57.7	62.3	54.8	113.7	146.5	146.6	150.1	91.9	119.9	138.3	147.3	198.4	56.2	46.5	59.8	60.6	101	55.5	69.1	45.3	53.4	85954.7	110751	110782	113453
[-].MESYHKPDQQKLQALK.[D]	1xAcetyl [N-Term]; 1xBiotin [K]	2	9	P29401	P29401 [1-16]	P29401 1xAcetyl [N-Term]; 1xBiotin [K]	Transketolase OS=Homo sapiens OX=9606 GN=TKT PE=1 SV=3	1	2212.09	0.181	0.499	0.208	-2.47	-1	-2.26	0.00585133	0.359554	0.0027855	0.0419974	1	0.0235357	207.9	103	165.6	37.6	51.4	34.5	200.6	143	204.5	198.6	83.4	99.3	215.1	159.7	149.7	53.8	36.3	13.3	68.4	42.9	49.6	33.2	10.5	38.2	38892.4	27730.4	39659.9	38500.4
[R].KFGDPVVQSDMK.[H]	1xBiotin [K1]	2	27	P0DMV9	P0DMV9 [77-88]	P0DMV9 1xBiotin [K77]	Heat shock 70 kDa protein 1B OS=Homo sapiens OX=9606 GN=HSPA1B PE=1 SV=1	1	1576.75	0.457	0.494	0.582	-1.13	-1.02	-0.78	0.00414581	0.029134	0.0227472	0.0312692	0.165781	0.139942	131.2	134.9	131.1	60	66.6	76.3	113.9	132.1	162.4	155	135.8	95.2	121.2	156.7	132	60.4	75	43.8	67.1	75.1	59.2	76.9	52.2	86.1	38493.2	44643.4	54871.1	52384.3
[R].KPIDYTVLDDVGHGVK.[WH]	1xBiotin [K1]	11	7	Q8IZP0	Q8IZP0 [139-154]	Q8IZP0 1xBiotin [K139]	Abl interactor 1 OS=Homo sapiens OX=9606 GN=ABI1 PE=1 SV=4	0	1982.01	0.29	0.493	0.364	-1.79	-1.02	-1.46	0.0606928	0.542278	0.0334023	0.318957	1	0.191382	151.2	137	147	43.8	67.6	53.4	219.9	131.6	81.7	186.6	70.8	119.3	306.2	127.9	109.8	67.9	23.3	38.2	52.3	58.8	72.9	46.5	26.4	59.9	19779	11831.6	7347.56	16782.7
[R].IKGPNAVQLVK.[T]	1xBiotin [K2]	3	1	Q7Z6Z7	Q7Z6Z7 [1916-1926]	Q7Z6Z7 1xBiotin [K1917]	E3 ubiquitin-protein ligase HUWE1 OS=Homo sapiens OX=9606 GN=HUWE1 PE=1 SV=3	1	1392.8	0.475	0.491	0.395	-1.07	-1.03	-1.34	0.0341757	0.44595	0.0279925	0.197509	1	0.166089	124.4	137.8	151.3	59.1	67.7	59.8	125.8	116.2	156	110.5	139.3	144.1	143.5	196.3	152.9	17.7	59.8	64.2	68.4	91.5	54.9	26	72.5	60.4	12162.8	11232.9	15085.7	10685.7
[K].EVVNKLIPDSIGK.[D]	1xBiotin [K5]	1	3	P61247	P61247 [183-195]	P61247 1xBiotin [K187]	40S ribosomal protein S3a OS=Homo sapiens OX=9606 GN=RPS3A PE=1 SV=2	1	1637.89	0.494	0.489	0.297	-1.02	-1.03	-1.75	0.116424	0.204631	0.0183961	0.534109	0.689708	0.116947	132.4	122.5	169.4	65.4	59.9	50.4	136.1	122.7	129.7	151.4	119.9	67.7	165.9	115.9	246.4	64.6	54.5	64	82.5	58.7	35.3	49.3	46.9	88.4	6583.54	5934.2	6270.73	7323.63
[R].HMGIGKR.[K]	1xBiotin [K6]	1	1	P84098	P84098 [75-81]	P84098 1xBiotin [K80]	60S ribosomal protein L19 OS=Homo sapiens OX=9606 GN=RPL19 PE=1 SV=1	1	1024.52	0.783	0.489	0.153	-0.35	-1.03	-2.7	1	0.292251	0.0078391	1	0.881544	0.0578188	136.2	92.7	190	106.6	45.3	29.2	82	127.2	124.2	81.3	125.3	84.6	100.9	173.3	241	309.7	44.1	97.2	34	45.9	41.4	37.3	23.9	26.6	7733.04	12003.1	11721.8	7673.94
[K].MFFTTKHR.[W]	1xBiotin [K6]; 1xOxidation [M1]	1	2	Q9Y6G3	Q9Y6G3 [115-122]	Q9Y6G3 1xBiotin [K120]	39S ribosomal protein L42, mitochondrial OS=Homo sapiens OX=9606 GN=MRPL42 PE=1 SV=1	1	1309.62	0.986	0.472	0.358	-0.02	-1.08	-1.48	0.989266	0.900205	0.486513	1	1	1	66.1	144.7	188.3	65.1	68.4	67.5	56.3	68.3	140.1	45.3	160.9	149.6	48.8	363.9	194.6	90.4	35.1	67.3	83.1	70.6	37.8	35.3	82.9	69.7	2473.32	2998.53	6153.5	1989.13
[K].NKTGAAPIIDVVR.[S]	1xBiotin [K2]	1	7	P46776	P46776 [93-105]	P46776 1xBiotin [K94]	60S ribosomal protein L27a OS=Homo sapiens OX=9606 GN=RPL27A PE=1 SV=2	1	1579.86	0.355	0.469	0.332	-1.49	-1.09	-1.59	0.12924	0.763236	0.1575	0.582891	1	0.661205	139.8	135.3	159.1	49.7	63.4	52.8	131.7	167.3	134.7	130.4	154	46.4	142.3	159.5	153.3	47.9	39.6	94.1	61.1	67.4	58.7	50.9	122.5	38.1	9326.45	11846.4	9542.39	9235.23
[-].MAAVKTLNPK.[A]	1xBiotin [K5]; 1xMet-loss+Acetyl [N-Term]	2	6	P40227	P40227 [1-10]	P40227 1xBiotin [K5]; 1xMet-loss+Acetyl [N-Term]	T-complex protein 1 subunit zeta OS=Homo sapiens OX=9606 GN=CCT6A PE=1 SV=3	1	1209.67	0.391	0.466	0.907	-1.36	-1.1	-0.14	0.29872	0.43008	0.995942	1	1	1	127.6	148.8	107.2	49.8	69.4	97.2	217	83.6	104.1	121.5	132.2	90.4	226.1	74.5	87.5	112.1	40.7	39	65.7	49.7	56.7	79.3	141.2	78.6	133371	51420.2	64018.1	74681.8
[K].KSADTLWGIQK.[E]	1xBiotin [K1]	3	10	P00338	P00338 [318-328]	P00338 1xBiotin [K318]	L-lactate dehydrogenase A chain OS=Homo sapiens OX=9606 GN=LDHA PE=1 SV=2	1	1472.76	0.209	0.464	0.253	-2.26	-1.11	-1.98	0.0640119	0.614692	0.0295877	0.327578	1	0.174007	213.5	112.3	141.6	44.6	52.1	35.9	221	122	222.4	116.3	220	26.5	197.4	135.5	146.6	46.2	43.2	55.5	28.4	60.7	54	28.6	38.6	37.1	22229.8	12271.9	22370.4	11697.1
[K].NLGIGKVSSFEEK.[M]	1xBiotin [K6]	2	19	P40926	P40926 [302-314]	P40926 1xBiotin [K307]	Malate dehydrogenase, mitochondrial OS=Homo sapiens OX=9606 GN=MDH2 PE=1 SV=3	1	1633.83	0.513	0.458	0.618	-0.96	-1.13	-0.7	0.10787	0.0655888	0.82562	0.505286	0.312718	1	137.6	121.6	132.5	70.6	55.7	81.9	84.9	183.3	137.3	121.4	74.6	137.8	132.3	105.8	145.9	65.6	70.5	71.9	45.7	55.6	62.8	141.6	81.3	81.7	13016.9	28112.1	21062.6	18609.5
[K].NIGLGFKTPK.[E]	1xBiotin [K7]	1	8	P62280	P62280 [39-48]	P62280 1xBiotin [K45]	40S ribosomal protein S11 OS=Homo sapiens OX=9606 GN=RPS11 PE=1 SV=3	1	1300.71	0.324	0.456	0.398	-1.63	-1.13	-1.33	7.4199e-06	0.000265602	2.32263e-05	0.000147844	0.00267589	0.00040269	152.8	137.6	141.2	49.5	62.8	56.2	151.4	176.7	143	119.1	136.3	139.6	140	138.9	163.2	63.2	49	40.5	48.2	62.2	69	45.4	58.7	55.7	18029.2	21038.5	17032.8	14179.5
[-].MPFSNSHNALKLR.[F]	1xBiotin [K11]; 1xMet-loss [N-Term]	1	16	P12277	P12277 [1-13]	P12277 1xBiotin [K11]; 1xMet-loss [N-Term]	Creatine kinase B-type OS=Homo sapiens OX=9606 GN=CKB PE=1 SV=1	1	1609.83	0.681	0.448	0.652	-0.56	-1.16	-0.62	0.965388	0.101617	1	1	0.436202	1	116	168.6	97.4	78.9	75.5	63.6	66.3	112.8	102.1	148.4	120.6	270.6	59.4	85.7	110.6	67.9	77.7	69.5	65.6	71.2	66.5	55.9	55.4	193.9	89980	153051	138553	201417
[K].HVVFGKVK.[E]	1xBiotin [K6]	2	27	P62937	P62937 [126-133]	P62937 1xBiotin [K131]	Peptidyl-prolyl cis-trans isomerase A OS=Homo sapiens OX=9606 GN=PPIA PE=1 SV=2	1	1139.64	1.016	0.447	0.893	0.02	-1.16	-0.16	0.999981	0.670566	0.960829	1	1	1	96.5	152.9	97.3	98.1	68.3	86.9	86.8	95.2	101.6	88.2	157.2	150.8	72.2	96	126.9	58.1	96.8	172.1	58.6	139.5	67.3	53.6	85.7	93.4	90121.3	98901.8	105462	91590
[K].AFGEKTIVPWK.[S]	1xBiotin [K5]	1	6	P22681	P22681 [193-203]	P22681 1xBiotin [K197]	E3 ubiquitin-protein ligase CBL OS=Homo sapiens OX=9606 GN=CBL PE=1 SV=2	1	1501.79	0.232	0.446	0.122	-2.11	-1.16	-3.04	0.018675	0.407869	0.00393729	0.115422	1	0.0314747	170.6	99.1	219.7	39.6	44.2	26.7	299	148	164	150.8	24.6	95.3	250.1	211.2	155.5	43.3	33.5	38	16.1	42.5	44.8	25.7	37.3	20.5	27175.3	13447.5	14901.8	13701.6
[K].SKEYFSK.[Q]	1xBiotin [K2]	1	8	Q06830	Q06830 [191-197]	Q06830 1xBiotin [K192]	Peroxiredoxin-1 OS=Homo sapiens OX=9606 GN=PRDX1 PE=1 SV=1	1	1114.52	0.563	0.445	0.686	-0.83	-1.17	-0.54	0.008175	0.0056112	0.0313723	0.0568418	0.0411591	0.182096	128.6	150.8	107.4	72.4	67.1	73.7	135.2	123.5	141.9	107	161.2	158.6	113	111.2	115	76.2	59.4	76.6	67	76.6	70.6	46.2	77.5	83.3	45451.3	41503.5	47699.4	35966.3
[R].GDAEAVKGIGSGK.[V]	1xBiotin [K7]	3	3	Q99538	Q99538 [119-131]	Q99538 1xBiotin [K125]	Legumain OS=Homo sapiens OX=9606 GN=LGMN PE=1 SV=1	1	1414.7	0.843	0.433	0.361	-0.25	-1.21	-1.47	0.993189	0.377485	0.141008	1	1	0.60921	78.8	152.4	173.7	66.5	65.9	62.7	47.1	93.5	87.4	79.5	169	196.7	96.4	192.6	205.4	77.4	73.7	41.3	67.2	84.7	73.1	98.1	69.5	47.3	1872.1	3718.55	3473.31	3159.66
[R].LGLELGKVVTK.[K]	1xBiotin [K7]	4	10	P11908	P11908 [23-33]	P11908 1xBiotin [K29]	Ribose-phosphate pyrophosphokinase 2 OS=Homo sapiens OX=9606 GN=PRPS2 PE=1 SV=2	1	1382.81	0.209	0.43	0.363	-2.26	-1.22	-1.46	0.00605739	0.180068	0.0141515	0.0430139	0.629296	0.0949356	182.3	130.3	141.7	38.1	56.1	51.5	198.7	111.3	182.1	106.7	130.1	184.7	141.5	120.4	170.7	50.8	38.1	29.4	41.4	56	103.8	20.5	62.3	51.4	24832.1	13908.9	22759.2	13337.4
[K].LIKDGLIIR.[K]	1xBiotin [K3]	1	1	P84098	P84098 [44-52]	P84098 1xBiotin [K46]	60S ribosomal protein L19 OS=Homo sapiens OX=9606 GN=RPL19 PE=1 SV=1	1	1266.76	0.487	0.426	0.38	-1.04	-1.23	-1.39	0.285348	0.0411251	0.00530256	1	0.218733	0.0413972	140.6	126.3	152.9	68.4	53.7	58.1	139.7	107.5	150.2	137.1	112.2	125.5	150.3	162.6	152	68	52.1	122.1	60.4	46.5	53.4	26.8	75.9	57.8	7585.63	5838.3	8151.46	7440.66
[K].AAGKGDVPTK.[R]	1xBiotin [K4]	1	2	P62424	P62424 [122-131]	P62424 1xBiotin [K125]	60S ribosomal protein L7a OS=Homo sapiens OX=9606 GN=RPL7A PE=1 SV=2	1	1169.6	0.416	0.424	0.382	-1.27	-1.24	-1.39	0.0167997	0.025067	0.0178881	0.104802	0.148073	0.114261	120.6	130.5	176.2	50.1	55.4	67.3	110	151.5	117.5	156.2	127.1	109.8	171.7	123.9	200.1	30.7	48.9	85	54	69.4	44.6	54.5	65.6	79.6	6556.29	9030.42	7005.43	9309.59
[K].EFEGKTLVSVTK.[E]	1xBiotin [K5]	3	14	P07900	P07900 [535-546]	P07900 1xBiotin [K539]	Heat shock protein HSP 90-alpha OS=Homo sapiens OX=9606 GN=HSP90AA1 PE=1 SV=5	1	1563.81	0.255	0.422	0.383	-1.97	-1.24	-1.39	0.000126987	0.0120074	0.00798978	0.00150025	0.0785781	0.0582861	168.7	117.6	159.8	43.1	49.6	61.2	176.1	162.3	170.1	124.6	118.6	105	187.1	161.2	155.9	17.8	43.4	50.8	53.4	50.1	34.5	49.1	78.2	61.7	23874.6	22006.4	23069.5	16902.3
[K].GQEVSPKVYFMK.[Q]	1xBiotin [K7]; 1xOxidation [M11]	1	29	P09936	P09936 [72-83]	P09936 1xBiotin [K78]	Ubiquitin carboxyl-terminal hydrolase isozyme L1 OS=Homo sapiens OX=9606 GN=UCHL1 PE=1 SV=2	1	1654.8	0.57	0.411	0.363	-0.81	-1.28	-1.46	0.124507	0.010939	0.00230905	0.567293	0.0722948	0.0202801	120.6	155.2	140.6	68.7	63.8	51.1	110.3	119.5	156.7	124.9	183.8	153.8	164.1	134.6	139.4	60.2	68.2	69.3	31.2	87.7	63.3	28	50.7	54.4	37375.4	40500.3	53085.4	42305.8
[K].YTEVLKTHGLLV.[-]	1xBiotin [K6]	1	11	P40429	P40429 [192-203]	P40429 1xBiotin [K197]	60S ribosomal protein L13a OS=Homo sapiens OX=9606 GN=RPL13A PE=1 SV=2	1	1598.86	0.254	0.408	0.304	-1.98	-1.29	-1.72	0.00543072	0.0430856	0.0123376	0.0391892	0.227349	0.0851968	182.8	103.7	172.3	46.4	42.3	52.4	189.6	115.3	177.8	177.3	79.5	100.8	202.3	154.5	167.6	48	33.3	45.2	41.1	37.9	48.5	51	28.5	102	38853.2	23630.5	36429.7	36332.6
[R].RNPDTQWITKPVHK.[H]	1xBiotin [K]	1	4	P61313	P61313 [144-157]	P61313 1xBiotin [K]	60S ribosomal protein L15 OS=Homo sapiens OX=9606 GN=RPL15 PE=1 SV=2	1	1946.01	0.412	0.407	0.273	-1.28	-1.3	-1.87	0.646206	0.730736	0.21207	1	1	0.835144	191.2	89.6	160.1	78.9	36.5	43.7	44.8	405.3	169.8	141.4	79.6	31.1	142.2	133.2	189.8	71.3	70	63.1	52.1	32.4	26.4	32.2	76.4	38.8	2407.41	21793	9131.34	7601.41
[-].MKIEEVK.[S]	1xBiotin [K2]	2	7	Q9Y265	Q9Y265 [1-7]	Q9Y265 1xBiotin [K2]	RuvB-like 1 OS=Homo sapiens OX=9606 GN=RUVBL1 PE=1 SV=1	1	1102.56	0.525	0.407	0.43	-0.93	-1.3	-1.22	0.0112712	0.00302196	0.00234684	0.0741237	0.0245995	0.0204773	124.6	159	130.2	65.4	64.8	56	108.4	123.8	159.2	130.6	169.6	158.1	117.1	129.4	143.3	67.8	58.1	65	70.6	64.4	61.9	35.6	55.7	81.5	42736.7	48816.1	62777.8	51487.1
[K].LMQKTQQYHK.[E]	1xBiotin [K4]	2	2	Q8WXF1	Q8WXF1 [248-257]	Q8WXF1 1xBiotin [K251]	Paraspeckle component 1 OS=Homo sapiens OX=9606 GN=PSPC1 PE=1 SV=1	1	1530.76	0.165	0.395	0.238	-2.6	-1.34	-2.07	0.133217	0.56172	0.0410205	0.593356	1	0.226291	179.1	106.7	196	29.5	42.1	46.6	36.7	204.5	157.6	41.4	157.8	93.9	107	508.1	172.5	40.6	26	21.1	37.1	42	34.6	36.6	41.7	41	3557.24	19816.6	15272.9	4012.51
[K].KTTDTASVQNEAK.[L]	1xBiotin [K1]	3	5	Q9ULV4	Q9ULV4 [428-440]	Q9ULV4 1xBiotin [K428]	Coronin-1C OS=Homo sapiens OX=9606 GN=CORO1C PE=1 SV=1	1	1618.77	0.993	0.393	0.633	-0.01	-1.35	-0.66	0.98489	0.517334	0.580705	1	1	1	78.4	152.3	141.7	77.9	59.9	89.8	84.3	45.2	156.9	163.8	169.2	106.4	69.8	152.4	206.2	37.5	86.4	83.8	89.3	64.4	58.8	30.2	96.5	98.9	4077.81	2184.28	7587.68	7923.8
[R].SGYYKVLGK.[G]	1xBiotin [K5]	1	12	P46776	P46776 [106-114]	P46776 1xBiotin [K110]	60S ribosomal protein L27a OS=Homo sapiens OX=9606 GN=RPL27A PE=1 SV=2	1	1240.64	0.292	0.387	0.293	-1.78	-1.37	-1.77	0.102257	0.069139	0.0164924	0.48409	0.327307	0.107402	133.2	139.7	181	38.8	54.1	53.1	142.8	121.6	135.4	142	126.6	155.3	154.4	186.9	183.9	39.5	39.1	67.1	18.1	95.5	55	22.3	54	60.6	23221.1	19775.2	22010.5	23083
[R].SGKPAELLKMFGIDR.[D]	1xBiotin [K9]; 1xOxidation [M10]	2	17	P29401	P29401 [595-609]	P29401 1xBiotin [K603]	Transketolase OS=Homo sapiens OX=9606 GN=TKT PE=1 SV=3	1	1903.98	0.209	0.38	0.131	-2.26	-1.39	-2.93	0.408337	0.618629	0.305782	1	1	1	130.8	152.2	205	27.3	57.9	26.8	500	51.5	74.7	192.7	86.9	73.2	271	77.9	117.1	76.3	15.6	14.7	33.1	13.9	60.4	118.7	7.3	15.3	125457	12924.4	18734	48350.3
[R].SPALKSPLQSVVVR.[R]	1xBiotin [K5]	1	5	Q9Y2W1	Q9Y2W1 [248-261]	Q9Y2W1 1xBiotin [K252]	Thyroid hormone receptor-associated protein 3 OS=Homo sapiens OX=9606 GN=THRAP3 PE=1 SV=2	1	1706.96	0.255	0.376	0.26	-1.97	-1.41	-1.94	0.00106731	0.00912827	0.000798161	0.00949906	0.0620145	0.00783489	174.9	131.7	158.2	44.6	49.5	41.1	161.4	130.1	285.4	121.5	109.8	138	145.9	132.4	185	70.9	33.3	41.1	35.7	45.7	48	52.8	37.9	25.2	9066.71	7309.64	16030.1	6824.57
[R].INFDKYHPGYFGK.[V]	1xBiotin [K5]	1	5	P46776	P46776 [43-55]	P46776 1xBiotin [K47]	60S ribosomal protein L27a OS=Homo sapiens OX=9606 GN=RPL27A PE=1 SV=2	1	1811.86	0.127	0.352	0.147	-2.98	-1.51	-2.76	0.456867	0.961583	0.192985	1	1	0.780714	192.9	75.4	244.7	24.4	26.5	36	261.8	68.1	123.3	186.9	7.5	48.2	549	103.7	156.3	97.4	15.6	12	49	10.6	17	60.1	10.5	23	76690.7	19945	36102	54745.5
[R].NIGKTLVTR.[T]	1xBiotin [K4]	1	16	P61247	P61247 [43-51]	P61247 1xBiotin [K46]	40S ribosomal protein S3a OS=Homo sapiens OX=9606 GN=RPS3A PE=1 SV=2	1	1227.69	0.369	0.35	0.503	-1.44	-1.51	-0.99	0.140532	0.53684	0.339538	0.613107	1	1	119.1	159.7	147.3	44	55.9	74	114.2	114.1	148.2	153.2	172	91.6	80.3	141.3	171	42.2	39.8	73.5	46.5	168.1	53.6	41.2	71	78	81844.4	81734.2	106175	109764
[R].STLNEIYFGKTK.[D]	1xBiotin [K10]	2	14	P47756	P47756 [226-237]	P47756 1xBiotin [K235]	F-actin-capping protein subunit beta OS=Homo sapiens OX=9606 GN=CAPZB PE=1 SV=4	1	1626.82	0.252	0.349	0.417	-1.99	-1.52	-1.26	0.000166715	0.00149211	0.000825205	0.00187029	0.0128514	0.00793112	176.1	130.7	143.3	44.4	45.6	59.8	116.4	190.6	172.3	127.9	97.5	146.6	253.7	122.1	140.2	44.7	42.1	43.5	38.3	44.6	52.1	61.1	47.9	58.5	44464.6	72781.8	65797.3	48829.3
[K].VDSSKMDK.[V]	1xBiotin [K5]	2	4	Q86XP3	Q86XP3 [904-911]	Q86XP3 1xBiotin [K908]	ATP-dependent RNA helicase DDX42 OS=Homo sapiens OX=9606 GN=DDX42 PE=1 SV=1	1	1135.51	0.33	0.345	0.321	-1.6	-1.54	-1.64	0.10333	0.0609175	0.0775755	0.48744	0.296806	0.380748	110.2	132.4	208.5	36.3	45.7	66.9	71.7	111.2	99.4	316.6	119.4	100.7	188.1	125.9	269	13.2	32.8	49.7	48.2	41.2	34.7	24.6	60.4	93.3	8989.79	13929.8	12452.5	39676
[R].GFPTIKIFQK.[G]	1xBiotin [K6]	5	5	Q15084	Q15084 [236-245]	Q15084 1xBiotin [K241]	Protein disulfide-isomerase A6 OS=Homo sapiens OX=9606 GN=PDIA6 PE=1 SV=1	1	1404.77	0.203	0.343	0.253	-2.3	-1.54	-1.98	0.0542736	0.129611	0.0215392	0.289821	0.49973	0.133124	181	133.6	161.7	36.8	45.9	41	165.5	176.1	194.1	173.2	62.8	130	182.2	134.6	157.3	132.3	35.8	25.5	50.5	24.9	44.7	47.9	22.8	39.9	27690.8	29455.5	32471.7	28967
[R].TNLGPKGTMK.[M]	1xBiotin [K6]	5	4	P40227	P40227 [36-45]	P40227 1xBiotin [K41]	T-complex protein 1 subunit zeta OS=Homo sapiens OX=9606 GN=CCT6A PE=1 SV=3	1	1272.64	0.363	0.343	0.228	-1.46	-1.54	-2.13	0.0220359	0.00833164	0.00617145	0.13133	0.0573337	0.0462859	113.8	140.6	208.3	41.3	48.3	47.6	101.8	122.6	146.9	126.5	151.5	195.8	224.5	239.5	104.6	52.3	44.6	23.4	52	52.2	24.1	51.3	27.6	58.9	7084.4	8535.01	10222.7	8804.39
[R].MVVPAALKVVR.[L]	1xBiotin [K8]	2	12	P40429	P40429 [118-128]	P40429 1xBiotin [K125]	60S ribosomal protein L13a OS=Homo sapiens OX=9606 GN=RPL13A PE=1 SV=2	1	1408.82	0.202	0.342	0.172	-2.31	-1.55	-2.54	0.00230528	0.00884805	0.000636808	0.0187655	0.0605751	0.00644044	183.8	122	183.8	37.2	41.8	31.6	181.3	143.7	200	227.4	106.5	120.3	181.3	118.4	218.1	39.2	36.7	27.7	41.2	25.6	45.6	12	31.2	43.9	27275.6	21624.7	30092	34212.4
[R].VLGPKIEAVQK.[V]	1xBiotin [K5]	4	3	Q7Z4V5	Q7Z4V5 [550-560]	Q7Z4V5 1xBiotin [K554]	Hepatoma-derived growth factor-related protein 2 OS=Homo sapiens OX=9606 GN=HDGFL2 PE=1 SV=1	1	1407.8	0.775	0.329	0.509	-0.37	-1.61	-0.98	0.999994	0.0406404	0.638373	1	0.217789	1	79.5	225	106	61.6	74	53.9	96.4	82.9	43.5	114.8	257.1	234.7	132.7	110.5	84.8	64.2	48.1	100.9	77.1	53.4	83.4	103.3	56.2	55.9	3271.29	2813.39	1477.23	3894.71
[R].LCQNPKLALK.[N]	1xBiotin [K6]; 1xCarbamidomethyl [C2]	1	4	P22681	P22681 [69-78]	P22681 1xBiotin [K74]	E3 ubiquitin-protein ligase CBL OS=Homo sapiens OX=9606 GN=CBL PE=1 SV=2	1	1410.76	0.302	0.328	0.563	-1.73	-1.61	-0.83	0.392161	0.133767	0.623619	1	0.507737	1	125.5	196.2	112.6	37.9	64.4	63.4	30.3	198.7	133.5	108.4	304.6	208.7	69.3	173.1	119.7	41.7	29.2	40.3	68.5	29.4	73.5	70.2	67.4	33.5	1678.59	11014.8	7399.13	6009.89
[K].AQAYQTGKDISTNYYASQK.[K]	1xBiotin [K8]	1	33	P14625	P14625 [664-682]	P14625 1xBiotin [K671]	Endoplasmin OS=Homo sapiens OX=9606 GN=HSP90B1 PE=1 SV=1	1	2363.1	0.263	0.324	0.314	-1.93	-1.62	-1.67	0.000500066	0.00633025	0.00343766	0.00480279	0.0449515	0.0285048	159.2	140	162.5	41.9	45.4	51	238.7	109.3	152.8	199.7	107.1	134.4	169.7	115.8	156	40.2	48.8	29.8	43.6	40.9	71	40.8	48.9	52.6	188649	86403.4	120773	157811
[K].VIATKVLGTVK.[W]	1xBiotin [K5]	4	26	P67809	P67809 [54-64]	P67809 1xBiotin [K58]	Y-box-binding protein 1 OS=Homo sapiens OX=9606 GN=YBX1 PE=1 SV=3	1	1354.81	0.409	0.318	0.419	-1.29	-1.66	-1.26	0.0501669	0.0912249	0.0878946	0.270281	0.403262	0.414627	144.5	138.2	151.1	59.2	43.9	63.2	137.3	118.4	164.2	116.1	131.2	132.6	183.6	143.5	121.8	78.8	56.2	35	41.7	99.5	38.5	41.2	100.5	60	21263.6	18336.8	25434.1	17985.3
[R].HLKIVYR.[R]	1xBiotin [K3]	1	7	P61927	P61927 [66-72]	P61927 1xBiotin [K68]	60S ribosomal protein L37 OS=Homo sapiens OX=9606 GN=RPL37 PE=1 SV=2	1	1154.65	0.176	0.315	0.215	-2.51	-1.67	-2.22	2.04317e-07	8.55101e-06	4.80313e-07	1.2171e-05	0.000170382	2.29006e-05	217.8	124.7	148.2	38.3	39.2	31.9	239.9	153	224.7	131.5	117.7	128.6	118.7	152.9	200.8	36.4	39.5	40	41	40.5	35.2	32.4	34.3	32.9	114898	73270.7	107602	63000.8
[R].KVGLIAAR.[R]	1xBiotin [K1]	1	5	P62917	P62917 [234-241]	P62917 1xBiotin [K234]	60S ribosomal protein L8 OS=Homo sapiens OX=9606 GN=RPL8 PE=1 SV=2	1	1053.62	0.155	0.307	0.318	-2.69	-1.71	-1.65	2.03372e-05	0.000907615	0.00157322	0.000298353	0.00807777	0.0142874	191.3	121.8	166.8	29.7	37.3	53	191.7	179.9	212.3	117.8	173.7	122.1	99.2	184.6	167.2	29.8	26.4	35.3	28.6	37.4	54.2	29.6	53.2	57.1	48747.8	45741	53987.6	29946.8
[R].VDKAAAAAAALQAK.[S]	1xBiotin [K3]	1	4	P36578	P36578 [351-364]	P36578 1xBiotin [K353]	60S ribosomal protein L4 OS=Homo sapiens OX=9606 GN=RPL4 PE=1 SV=5	1	1524.82	0.241	0.304	0.415	-2.05	-1.72	-1.27	0.00519819	0.46061	0.15153	0.0379212	1	0.646199	192.3	136.4	129.6	46.4	41.5	53.8	352.6	179.2	182.9	132.2	129.8	30.9	121.4	140.8	123.3	44.1	26.5	59.7	39.5	53.4	33	34.7	64.9	51.2	24606.4	12501.8	12763.4	9222.19
[K].IVSGKDYNVTANSK.[L]	1xBiotin [K5]	4	7	P00338	P00338 [77-90]	P00338 1xBiotin [K81]	L-lactate dehydrogenase A chain OS=Homo sapiens OX=9606 GN=LDHA PE=1 SV=2	1	1721.85	0.316	0.303	0.533	-1.66	-1.72	-0.91	0.0609244	0.116506	0.415048	0.318957	0.47132	1	166.5	167.1	106.4	52.6	50.7	56.7	282.2	144.6	127.7	145.1	153.2	120.2	85.4	121.4	92.4	91.9	44.4	45.7	113.4	44	28.8	76.2	49.3	34	22487.8	11523.9	10175.5	11564.5
[R].AMKTVFGVEPDLTR.[E]	1xBiotin [K3]	2	8	Q96KP4	Q96KP4 [400-413]	Q96KP4 1xBiotin [K402]	Cytosolic non-specific dipeptidase OS=Homo sapiens OX=9606 GN=CNDP2 PE=1 SV=2	1	1789.9	0.276	0.303	0.213	-1.86	-1.72	-2.23	0.0609147	0.0655698	0.00930314	0.318957	0.312718	0.0660622	167.4	161.1	145.6	46.1	48.8	31.1	239.1	74.9	182.3	180.6	68.1	175.5	215.5	158.6	126.7	52.7	37.1	50.2	53.1	20.1	63.7	33.8	34.1	33.8	18098.2	5665.8	13797.9	13669.5
[R].GKATISNDGATILK.[L]	1xBiotin [K2]	2	6	Q99832	Q99832 [54-67]	Q99832 1xBiotin [K55]	T-complex protein 1 subunit eta OS=Homo sapiens OX=9606 GN=CCT7 PE=1 SV=2	1	1614.85	0.341	0.301	0.393	-1.55	-1.73	-1.35	0.00916151	0.0060754	0.113916	0.0620843	0.0438414	0.510326	159.6	151.8	135.3	54.4	45.7	53.2	171	165.1	124.3	101.7	249.5	157	94.8	154.8	140	57.2	56.3	25.2	25.3	47.3	62.3	50.6	62.8	55	12497.7	12065.7	9087.21	7432.86
[K].ANPFGGASHAKGIVLEK.[V]	1xBiotin [K]	1	28	P62266	P62266 [38-54]	P62266 1xBiotin [K]	40S ribosomal protein S23 OS=Homo sapiens OX=9606 GN=RPS23 PE=1 SV=3	1	1922	0.295	0.3	0.271	-1.76	-1.74	-1.89	0.00452638	0.0233603	0.0132195	0.0337582	0.140477	0.089584	151.4	144.6	170	44.7	43.3	46	160.6	122	162.1	164.7	65.9	153.4	180.4	188.4	129.5	47.4	41.5	49.9	43.5	46	52.5	45.4	48.8	97.9	155945	118457	157419	159900
[K].LSKHCSQVDSVR.[G]	1xBiotin [K3]; 1xCarbamidomethyl [C5]	3	1	Q14247	Q14247 [108-119]	Q14247 1xBiotin [K110]	Src substrate cortactin OS=Homo sapiens OX=9606 GN=CTTN PE=1 SV=2	1	1641.78	0.887	0.299	0.284	-0.17	-1.74	-1.82	0.745166	0.275827	0.35314	1	0.840704	1	69.9	187.9	174.6	62	56.2	49.5	65.7	216.7	67.5	61.7	181.6	274.5	48	265.1	168.7	65	33.6	59.9	54.3	59.5	34.6	35.3	47.9	60.3	3829.04	12641.2	3938.5	3600.27
[K].ANVGAGKK.[KM-]	1xBiotin [K]	3	26	P62847-4	P62847-4 [123-130]	P62847-4 1xBiotin [K]	Isoform 4 of 40S ribosomal protein S24 OS=Homo sapiens OX=9606 GN=RPS24	1	970.514	0.288	0.295	0.488	-1.79	-1.76	-1.04	0.000259152	7.73337e-05	0.00103855	0.00274577	0.00101216	0.00990329	164.4	142.9	136.6	47.4	42.2	66.6	151.3	170.2	154.6	121.8	179.5	134.4	122.5	196.2	128.5	44.6	44.3	65.5	33.8	45.2	39.7	39.3	62.7	66	358458	403428	366407	288594
[K].IKTLFPLIEAK.[K]	1xBiotin [K2]	1	24	P13010	P13010 [533-543]	P13010 1xBiotin [K534]	X-ray repair cross-complementing protein 5 OS=Homo sapiens OX=9606 GN=XRCC5 PE=1 SV=3	1	1498.87	0.162	0.295	0.423	-2.63	-1.76	-1.24	0.00036497	0.0100631	0.00538833	0.00369118	0.0671714	0.0415805	208.1	146.6	118.4	33.7	43.2	50	237.9	139.7	216.4	152.4	81.1	164.9	163.9	120.8	123.1	58.5	35.1	33.9	52.5	38.4	44.9	52	28.2	56.2	77070.6	45266.8	70091.7	49383.3
[R].LLEQKTQESQK.[K]	1xBiotin [K5]	3	5	O43670	O43670 [96-106]	O43670 1xBiotin [K100]	BUB3-interacting and GLEBS motif-containing protein ZNF207 OS=Homo sapiens OX=9606 GN=ZNF207 PE=1 SV=1	1	1557.79	0.282	0.291	0.437	-1.83	-1.78	-1.2	0.0427805	0.033415	0.496021	0.236979	0.184838	1	167.6	176.1	109.8	47.2	51.3	47.9	171.1	142.1	172.1	131.6	179.7	275.8	28.7	187.4	112	29.7	48.2	51.1	52.4	54.1	33.9	48.9	27.6	53.5	11918.6	9902.93	11991.4	9167.82
[K].QIGIIKTNK.[K]	1xBiotin [K6]	4	2	P35637	P35637 [307-315]	P35637 1xBiotin [K312]	RNA-binding protein FUS OS=Homo sapiens OX=9606 GN=FUS PE=1 SV=1	1	1240.71	0.281	0.283	0.567	-1.83	-1.82	-0.82	0.025697	0.0115111	0.074537	0.152469	0.0757009	0.367184	156.7	181.1	106.6	44	51.2	60.4	183.6	148.1	107.7	171.2	191.3	143.1	100.7	242	88.4	51.9	36.7	41.6	62	48.4	26.7	25.4	57.1	74.1	10191.5	8219.27	5978.83	9503.46
[K].VGVGKVIR.[G]	1xBiotin [K5]	1	2	Q00688	Q00688 [166-173]	Q00688 1xBiotin [K170]	Peptidyl-prolyl cis-trans isomerase FKBP3 OS=Homo sapiens OX=9606 GN=FKBP3 PE=1 SV=1	1	1053.62	0.288	0.282	0.559	-1.8	-1.82	-0.84	0.00175306	0.000894382	0.113599	0.0146271	0.00801343	0.510326	142.5	187	113.2	41.1	52.8	63.3	95.2	138.4	159.7	291.9	181.5	172.8	102.3	109.9	122.9	18.6	39.9	50.3	38.4	59.4	51.3	39.7	61.5	66.4	13959.2	20287.8	23415.3	42799.8
[K].SSTPGLKSNTPTPR.[N]	1xBiotin [K7]	7	6	Q04726	Q04726 [310-323]	Q04726 1xBiotin [K316]	Transducin-like enhancer protein 3 OS=Homo sapiens OX=9606 GN=TLE3 PE=1 SV=2	1	1668.84	0.18	0.273	0.244	-2.48	-1.87	-2.03	0.00213173	0.00587669	0.000700416	0.0174592	0.042871	0.00703049	154	167.4	165	27.7	45.7	40.3	126.2	144.2	143.5	122.2	234.5	156	153.7	149.6	254.9	25.8	16.5	53.1	31.4	50.7	42.6	17.7	37.5	39.7	12720.6	14537.1	14472.4	12323.3
[K].AGLVIGKGGETIK.[Q]	1xBiotin [K]	3	14	Q96AE4; Q92945	Q96AE4 [197-209]; Q92945 [245-257]	Q96AE4 1xBiotin [K]; Q92945 1xBiotin [K]	Far upstream element-binding protein 1 OS=Homo sapiens OX=9606 GN=FUBP1 PE=1 SV=3 Far upstream element-binding protein 2 OS=Homo sapiens OX=9606 GN=KHSRP PE=1 SV=4	1	1468.82	0.264	0.273	0.255	-1.92	-1.87	-1.97	8.7891e-06	2.23392e-05	6.74433e-06	0.000160979	0.000368131	0.00016078	159.8	158.5	156.4	42.2	43.2	39.8	176	130.2	157.6	146.6	182.8	156.2	143.1	165.3	154.2	29.2	54.4	41.6	42.5	59.6	42.6	39.3	42.7	36	23014	17032.8	20612.4	19169.3
[R].GPPASSPAPAPKFSPVTPK.[F]	1xBiotin [K12]	2	6	Q15942	Q15942 [254-272]	Q15942 1xBiotin [K265]	Zyxin OS=Homo sapiens OX=9606 GN=ZYX PE=1 SV=1	1	2059.07	0.213	0.271	0.22	-2.23	-1.89	-2.18	0.0198739	0.0381131	0.00590135	0.121705	0.207677	0.0445102	198.8	112.3	177.2	42.3	30.4	39	70.9	200.3	219.9	95.6	113.2	182.4	178.5	176.3	189	26.5	42.6	56.4	30.6	72.9	26.5	39.3	47.1	31.8	3965.98	11208.6	12303.9	5350.31
[R].KDAFADAVQR.[A]	1xBiotin [K1]	1	2	Q92945	Q92945 [71-80]	Q92945 1xBiotin [K71]	Far upstream element-binding protein 2 OS=Homo sapiens OX=9606 GN=KHSRP PE=1 SV=4	1	1346.65	0.285	0.268	0.202	-1.81	-1.9	-2.31	0.000105982	0.00016052	4.26309e-05	0.00127465	0.00181605	0.000618612	137.2	173.4	169.6	39.1	46.5	34.2	205.4	139.9	113.5	183.9	176.8	136.3	122.1	177.6	172.9	47	39.9	32.9	41.6	50.1	47.4	34.9	50.4	27.5	14594.4	9943.79	8068.2	13070.3
[K].VAQPKEVYR.[Q]	1xBiotin [K5]	3	3	O14979	O14979 [307-315]	O14979 1xBiotin [K311]	Heterogeneous nuclear ribonucleoprotein D-like OS=Homo sapiens OX=9606 GN=HNRNPDL PE=1 SV=3	1	1315.68	0.254	0.266	0.532	-1.98	-1.91	-0.91	0.000151469	0.000527607	0.0262106	0.00173792	0.00485442	0.15738	156.6	161.2	130.3	39.8	42.8	69.3	172.8	147.2	152.9	131.3	180.4	157.3	127.1	111.6	143.9	29.8	38.8	64.9	41.8	69.4	40.5	54.3	68.4	67.7	15384.2	13098.6	13607.2	11685.6
[K].GTVMVGKPSSHSQYTSSGSVSSSGSK.[S]	1xBiotin [K7]; 1xOxidation [M4]	1	1	Q15648	Q15648 [1070-1095]	Q15648 1xBiotin [K1076]	Mediator of RNA polymerase II transcription subunit 1 OS=Homo sapiens OX=9606 GN=MED1 PE=1 SV=4	0	2771.26	0.939	0.264	0.269	-0.09	-1.92	-1.9	0.99985	0.108359	0.17186	1	0.450653	0.710318	77.6	156.4	198.6	72.9	41.3	53.3	34.5	88.2	76.8	72.7	154.8	369.8	70.5	222.6	196.6	75.1	58.1	72.1	77.2	40.8	38.2	52.8	54.9	44.3	1628.48	4163.5	3622.98	3428.76
[K].HQPHKVTQYK.[K]	1xBiotin [K5]	2	10	P83881	P83881 [18-27]	P83881 1xBiotin [K22]	60S ribosomal protein L36a OS=Homo sapiens OX=9606 GN=RPL36A PE=1 SV=2	1	1491.75	0.096	0.257	0.358	-3.38	-1.96	-1.48	0.000258901	0.0364046	0.0735818	0.00274577	0.2	0.365173	158.8	193.9	134.1	15.3	49.9	48	152	122.9	174.5	86.3	185.7	303.3	114.5	195.5	128.4	8.5	15.9	14.6	23.7	83	47.8	27.7	69.7	46	26642.4	21529.8	30584.3	15126.4
[R].GAPLAKVVFR.[D]	1xBiotin [K6]	1	38	P62917	P62917 [55-64]	P62917 1xBiotin [K60]	60S ribosomal protein L8 OS=Homo sapiens OX=9606 GN=RPL8 PE=1 SV=2	1	1283.73	0.165	0.257	0.421	-2.6	-1.96	-1.25	3.77802e-05	0.000182033	0.00356738	0.000504366	0.00199192	0.0293979	188.6	157.1	128.7	31.2	40.3	54.1	125.3	196.4	199.4	122.4	163.6	226.7	98.8	134	154.4	40.2	30.8	32.5	44.2	40.7	42	32.6	59.7	56.4	68650.1	107622	109248	67053.8
[K].IVNLGSSKTDLFYER.[K]	1xBiotin [K8]	1	20	Q7RTV0	Q7RTV0 [88-102]	Q7RTV0 1xBiotin [K95]	PHD finger-like domain-containing protein 5A OS=Homo sapiens OX=9606 GN=PHF5A PE=1 SV=1	1	1967.99	0.077	0.256	0.056	-3.71	-1.97	-4.17	0.0153855	0.151182	0.00866423	0.0982761	0.556001	0.0628627	213.2	107.5	223	16.3	27.5	12.4	443.1	73.1	145.3	280.9	32.6	73.2	336.5	151.9	124.1	25.5	11.1	7.4	21.1	10.5	18.8	30.9	5.7	8.5	133986	22097.7	43925.3	84953.5
[K].MKIPIANTEK.[Y]	1xBiotin [K2]; 1xOxidation [M1]	2	6	O60583	O60583 [484-493]	O60583 1xBiotin [K485]	Cyclin-T2 OS=Homo sapiens OX=9606 GN=CCNT2 PE=1 SV=2	1	1386.71	0.375	0.254	0.115	-1.42	-1.98	-3.13	0.463902	0.0318024	0.00205258	1	0.179899	0.0183906	95.3	134.7	269.2	35.7	34.2	30.8	26.6	113.4	85.3	120.6	266.7	111.4	167	241.1	365.5	32	22.4	38.4	53.2	28.4	30.6	18.4	51.4	27.6	2082.67	8873.62	6674.94	9439.85
[K].LCAKGSGPSR.[R]	1xBiotin [K4]; 1xCarbamidomethyl [C2]	5	21	Q92466	Q92466 [37-46]	Q92466 1xBiotin [K40]	DNA damage-binding protein 2 OS=Homo sapiens OX=9606 GN=DDB2 PE=1 SV=1	1	1258.6	0.296	0.253	0.227	-1.76	-1.98	-2.14	1.87167e-06	1.37033e-06	8.28903e-07	5.31635e-05	4.06531e-05	3.35329e-05	141.7	152.8	183.2	41.9	38.7	41.7	208.8	137.9	143.5	138.1	154.8	156.3	132	185.5	186	45.3	42.5	38.2	39.2	39.3	34.4	32	42.2	44.1	81576.8	53878.8	56064.1	53965.8
[R].LGESKYLMALK.[N]	1xBiotin [K5]; 1xOxidation [M8]	3	4	P50579	P50579 [423-433]	P50579 1xBiotin [K427]	Methionine aminopeptidase 2 OS=Homo sapiens OX=9606 GN=METAP2 PE=1 SV=1	1	1494.77	0.28	0.25	0.243	-1.84	-2	-2.04	0.000148449	0.000112365	0.000504265	0.00172329	0.00133935	0.00538555	171.6	162.6	142.6	48	40.6	34.6	225.2	169.1	153.4	132.9	160.2	197.9	98.8	144.9	140.5	47.3	58	34.6	34	44.7	40	28.1	34.1	56.3	14019.4	10524	9550.55	8270.19
[K].AENKGISPVVSEHR.[K]	1xBiotin [K4]	4	20	Q99700	Q99700 [778-791]	Q99700 1xBiotin [K781]	Ataxin-2 OS=Homo sapiens OX=9606 GN=ATXN2 PE=1 SV=2	1	1748.87	0.349	0.248	0.368	-1.52	-2.01	-1.44	0.00702695	0.000530896	0.00570259	0.0493736	0.00485442	0.0435026	120.3	203.7	134.1	42	50.5	49.4	131.7	99.4	114.4	193.7	126	286.4	210.9	113.2	127.5	27.5	40	51.9	33.9	49.9	48	36	47	62.6	48904.9	36903.4	42455.6	71898.9
[K].IMSSPLSKELR.[Q]	1xBiotin [K8]	2	6	P61254	P61254 [29-39]	P61254 1xBiotin [K36]	60S ribosomal protein L26 OS=Homo sapiens OX=9606 GN=RPL26 PE=1 SV=1	1	1486.78	0.185	0.247	0.214	-2.44	-2.02	-2.22	1.82497e-05	0.000132557	3.77436e-05	0.000273034	0.00153881	0.000559863	172.6	144.5	177.4	31.9	35.7	38	156.4	216	173.5	98.6	148	145.2	180.4	166	178.3	32	55.7	26.5	35.9	29.7	38.1	50.4	31.2	38.2	11674.6	16126.4	12950.2	7357.96
[K].GVPVISVKTSGSK.[E]	1xBiotin [K8]	4	6	Q15424	Q15424 [571-583]	Q15424 1xBiotin [K578]	Scaffold attachment factor B1 OS=Homo sapiens OX=9606 GN=SAFB PE=1 SV=4	1	1484.81	0.174	0.245	0.127	-2.52	-2.03	-2.98	4.3565e-05	8.34046e-05	8.45369e-06	0.000559223	0.00104749	0.000186859	184.6	143.1	182.1	32.1	35.1	23.1	183.4	137.6	220.4	142.2	174	124.7	134	231	181	38.6	29.6	31.9	21	37.9	34.8	22.9	36.3	18.6	19076.1	14315.3	22925.9	14785.1
[R].LIYDTKGR.[F]	1xBiotin [K6]	1	1	P62701	P62701 [101-108]	P62701 1xBiotin [K106]	40S ribosomal protein S4, X isoform OS=Homo sapiens OX=9606 GN=RPS4X PE=1 SV=2	1	1191.62	0.279	0.244	0.364	-1.84	-2.03	-1.46	0.764863	0.108126	0.354685	1	0.450653	1	154.9	177.6	132.6	43.2	43.4	48.3	18.6	179.8	159.2	92.8	182.4	210.3	113.1	136.2	318.3	44.4	29.8	44.4	13.3	49.6	44.5	45.4	49.6	68.2	3986.13	38473.3	34049.8	19857.9
[K].ADINTKWAATR.[W]	1xBiotin [K6]	1	7	P50914	P50914 [80-90]	P50914 1xBiotin [K85]	60S ribosomal protein L14 OS=Homo sapiens OX=9606 GN=RPL14 PE=1 SV=4	1	1472.73	0.26	0.243	0.254	-1.94	-2.04	-1.98	3.27561e-05	5.56471e-05	2.67089e-05	0.000446219	0.00075805	0.000434835	172.6	154.2	152.3	44.9	37.5	38.6	211.4	162	151.9	182	141.7	144.7	130.5	142.9	157.3	42.2	51	40.5	62.9	34.8	35.2	36.2	45	27.7	48149.9	36881.6	34596.9	41435.3
[R].FNVLKVTK.[A]	1xBiotin [K5]	1	11	P62280	P62280 [140-147]	P62280 1xBiotin [K144]	40S ribosomal protein S11 OS=Homo sapiens OX=9606 GN=RPS11 PE=1 SV=3	1	1174.67	0.163	0.242	0.22	-2.62	-2.04	-2.18	3.32555e-05	0.00344514	0.000732522	0.000448446	0.0272146	0.00724382	158.7	160.5	177.1	25.8	38.9	39	161.1	164.2	162	104.6	163.9	213.9	180.8	139	184.3	26.3	11.7	32.1	38.1	39.7	61.8	45.1	39.8	31.6	56729.5	57828.7	57060.7	36827.6
[K].MGKIDIDYQK.[L]	1xBiotin [K3]	1	7	Q13435	Q13435 [561-570]	Q13435 1xBiotin [K563]	Splicing factor 3B subunit 2 OS=Homo sapiens OX=9606 GN=SF3B2 PE=1 SV=2	1	1436.69	0.158	0.242	0.249	-2.66	-2.05	-2.01	0.000339963	0.000301539	0.000530703	0.00349116	0.00295996	0.00553507	195.6	161.8	138.1	31	39.2	34.3	83.4	205.8	231	170.2	200.8	145.5	145.3	145	149.2	45.2	32.6	28.5	41.2	29.2	41.2	36.1	26.5	43.1	6824.33	16834	18891.3	13920.8
[R].IMKAQAYQTGK.[DG]	1xBiotin [K3]	2	12	P14625	P14625 [661-671]	P14625 1xBiotin [K663]	Endoplasmin OS=Homo sapiens OX=9606 GN=HSP90B1 PE=1 SV=1	1	1464.73	0.138	0.238	0.279	-2.86	-2.07	-1.84	0.00244067	0.0153277	0.0167756	0.0195108	0.0960681	0.108191	201	168.2	127.5	27.7	40.1	35.6	100.6	223.5	197.7	103.7	267.5	165.5	102.4	125.4	162.1	25.3	27.3	43.1	70.6	39.4	32.5	21.8	35	56.6	25934.4	57597.6	50954.2	26726.5
[K].FSPVTPKFTPVASK.[F]	1xBiotin [K7]	2	5	Q15942	Q15942 [266-279]	Q15942 1xBiotin [K272]	Zyxin OS=Homo sapiens OX=9606 GN=ZYX PE=1 SV=1	1	1731.91	0.245	0.238	0.232	-2.03	-2.07	-2.11	6.35344e-05	0.000168829	6.26938e-05	0.000800174	0.00189401	0.000832155	189.9	169.2	125.1	46.5	40.2	29	173	159.5	219.6	154.1	136.4	217.5	209.6	106.3	114	48.1	42.3	23.1	43.7	36.6	35.2	26.4	29.4	25.2	15491.6	14278.7	19665.9	13798.9
[K].LYEQLSGK.[-]	1xBiotin [K8]	1	4	P30086	P30086 [180-187]	P30086 1xBiotin [K187]	Phosphatidylethanolamine-binding protein 1 OS=Homo sapiens OX=9606 GN=PEBP1 PE=1 SV=3	0	1163.58	0.307	0.229	0.232	-1.7	-2.13	-2.11	0.00986785	0.00286306	0.00240626	0.0665333	0.0235937	0.0208594	152.1	167.2	158.9	46.7	38.3	36.9	130.1	157.2	190.6	100.8	222.8	172.8	118.2	173.2	164.2	40.4	50.4	48.3	39.6	23	56.5	38.1	19.7	54.1	9546.72	11533.6	13983.8	7393.69
[R].EFLHHKEK.[V]	1xBiotin [K6]	1	1	P30533	P30533 [175-182]	P30533 1xBiotin [K180]	Alpha-2-macroglobulin receptor-associated protein OS=Homo sapiens OX=9606 GN=LRPAP1 PE=1 SV=1	1	1293.64	0.458	0.228	0.556	-1.13	-2.13	-0.85	0.404053	0.211307	0.444037	1	0.703479	1	128.9	189.8	115	59	43.3	64	75.7	210	135.3	46.6	199.3	249	82.7	120.7	192.8	35.2	61.9	76.7	45.4	63.7	33.7	36.4	67.1	67.8	3615.15	10029.8	6462.37	2227.52
[R].NPDTQWITKPVHK.[H]	1xBiotin [K9]	1	4	P61313	P61313 [145-157]	P61313 1xBiotin [K153]	60S ribosomal protein L15 OS=Homo sapiens OX=9606 GN=RPL15 PE=1 SV=2	0	1789.91	0.217	0.226	0.271	-2.21	-2.14	-1.88	0.0158164	0.162716	0.0579981	0.0995986	0.588689	0.303637	162.5	168.8	153.5	35.2	38.2	41.7	306.7	106	170.1	201.9	176.7	33.2	160.6	121.9	173.7	40.7	36.9	31.8	42.4	31.7	40	43.6	45.9	36.3	23820.4	8228.56	13208.6	15676.7
[K].LIKGVIVDK.[D]	1xBiotin [K3]	2	6	P48643	P48643 [224-232]	P48643 1xBiotin [K226]	T-complex protein 1 subunit epsilon OS=Homo sapiens OX=9606 GN=CCT5 PE=1 SV=1	1	1210.72	0.123	0.226	0.154	-3.02	-2.15	-2.7	3.97494e-06	0.000116337	2.44014e-05	9.14921e-05	0.00137443	0.000415419	182.5	133.2	200.8	22.5	30.1	31	192.4	147.4	187.2	183.2	125.4	136.6	220.3	146.9	206	24.8	23.1	14.5	28.7	33.7	30.9	19.1	48	31.8	33778.4	25865	32868.2	32164.9
[K].ANVGAGKKPK.[E]	1xBiotin [K8]	1	4	P62847	P62847 [123-132]	P62847 1xBiotin [K130]	40S ribosomal protein S24 OS=Homo sapiens OX=9606 GN=RPS24 PE=1 SV=1	1	1195.66	0.288	0.226	0.155	-1.8	-2.15	-2.69	0.00112045	0.000103046	2.77773e-05	0.009713	0.00125061	0.000446779	130.7	188.7	173.5	37.6	42.6	26.8	104.3	137.5	124.8	180.1	167.4	254.4	148.7	165.7	196.1	29.3	35.9	42.4	28.4	56.2	40.7	18.7	43.7	25.6	13288.4	17507.7	15893.8	22937.6
[R].MVVPAALKVVR.[L]	1xBiotin [K8]; 1xOxidation [M1]	2	3	P40429	P40429 [118-128]	P40429 1xBiotin [K125]	60S ribosomal protein L13a OS=Homo sapiens OX=9606 GN=RPL13A PE=1 SV=2	1	1424.81	0.179	0.223	0.29	-2.48	-2.17	-1.79	0.00786109	0.0190901	0.0361459	0.0549453	0.117988	0.201083	181.1	137.2	169.6	32.4	30.6	49.1	177.6	112	201.7	124.4	134.6	152.6	129.3	248	166.3	31.8	16.5	45.4	30	49.4	18.7	19.8	93.9	48.2	15826.8	9980.7	17977.6	11089
[K].SPAKSPNPSTPR.[G]	1xBiotin [K4]	2	2	O76021	O76021 [392-403]	O76021 1xBiotin [K395]	Ribosomal L1 domain-containing protein 1 OS=Homo sapiens OX=9606 GN=RSL1D1 PE=1 SV=3	1	1464.73	0.523	0.222	0.19	-0.93	-2.17	-2.4	0.922477	0.129086	0.0361497	1	0.49973	0.201083	116.3	164.1	186.8	60.8	36.5	35.5	203.9	123.6	30.4	196.1	174.5	54.9	198.6	148.6	248.1	77.1	64.7	43.4	29.5	38.8	42	31.8	37.7	56.3	10795.4	6544.3	1610.49	10384
[R].FPKILENLR.[L]	1xBiotin [K3]	2	18	P12532	P12532 [341-349]	P12532 1xBiotin [K343]	Creatine kinase U-type, mitochondrial OS=Homo sapiens OX=9606 GN=CKMT1A PE=1 SV=1	1	1355.75	0.134	0.221	0.151	-2.9	-2.18	-2.72	0.000352952	0.0244366	0.000825787	0.00359688	0.145637	0.00793112	179.4	117.7	219.6	24.1	26	33.2	179.7	106.9	314.1	119.8	64.3	117.9	288.9	170.2	220	24.2	25	8.8	29	26.1	19.3	38.6	13.9	33.3	34525.8	20543.8	60342.2	23018.5
[R].SKLILFPR.[K]	1xBiotin [K2]	1	20	P26373	P26373 [122-129]	P26373 1xBiotin [K123]	60S ribosomal protein L13 OS=Homo sapiens OX=9606 GN=RPL13 PE=1 SV=4	1	1199.7	0.173	0.221	0.138	-2.53	-2.18	-2.86	2.95754e-07	1.40647e-06	6.59198e-08	1.51858e-05	4.08181e-05	5.87031e-06	178.7	125.5	208.4	31	27.7	28.7	234.7	137.3	181.5	130.5	120.7	127.5	211.7	228.8	166.9	25.6	38.1	31.4	24.7	30.2	28.1	23.2	29.9	29.1	73924.4	43253.6	57149.8	41095.2
[K].TAASAPANVSKGTTPLAPPPKPVR.[R]	1xBiotin [K11]	4	19	Q96D71	Q96D71 [681-704]	Q96D71 1xBiotin [K691]	RalBP1-associated Eps domain-containing protein 1 OS=Homo sapiens OX=9606 GN=REPS1 PE=1 SV=3	1	2554.38	0.198	0.211	0.246	-2.33	-2.25	-2.02	0.948778	0.980983	0.975101	1	1	1	149.4	173.8	169	29.6	36.6	41.6	11.8	189.8	237.9	11.9	259.9	220.8	12.6	214.7	251.4	19.5	37.6	50.9	27.5	65.9	46.5	20.2	52.8	68.4	1691.03	27251	34158	1715.35
[K].GFGGKFGVQTDR.[Q]	1xBiotin [K5]	3	31	Q14247	Q14247 [231-242]	Q14247 1xBiotin [K235]	Src substrate cortactin OS=Homo sapiens OX=9606 GN=CTTN PE=1 SV=2	1	1494.72	0.315	0.206	0.284	-1.67	-2.28	-1.82	0.000596266	0.000217077	0.000310482	0.0056455	0.00226405	0.00348314	162.2	179	132.9	51.1	36.9	37.8	276.3	129.4	156.3	180.8	172.6	127.4	119.4	141.2	128.1	57.3	43	49.3	31.3	49.9	35.6	22.4	36.4	43.4	234969	110059	132948	153733
[K].AVELAANTKGICFIR.[T]	1xBiotin [K9]; 1xCarbamidomethyl [C12]	2	28	P29401	P29401 [457-471]	P29401 1xBiotin [K465]	Transketolase OS=Homo sapiens OX=9606 GN=TKT PE=1 SV=3	1	1888.98	0.19	0.205	0.15	-2.4	-2.29	-2.74	0.0151071	0.049502	0.0123807	0.0969614	0.2532	0.0851968	143.6	215.1	147.8	27.3	44.1	22.1	262.2	118.5	127.8	328.5	50.5	191.5	217.7	131.6	130.3	34.7	24.3	14.2	39.2	15.2	43.8	19.7	12.9	37.3	154883	70008.5	75506.3	194002
[R].RQQEGFKGTFPDAR.[E]	1xBiotin [K7]	2	4	Q15233	Q15233 [365-378]	Q15233 1xBiotin [K371]	Non-POU domain-containing octamer-binding protein OS=Homo sapiens OX=9606 GN=NONO PE=1 SV=4	2	1862.9	0.214	0.198	0.14	-2.22	-2.34	-2.83	0.312449	0.0649774	0.15689	1	0.312718	0.660719	153.7	175	178.6	32.9	34.6	25.1	41.9	155.3	201.5	91.1	404.9	176.8	28.7	242.4	180.5	28.4	39.7	33.3	36.7	27.4	35	24.7	26.5	25.4	4153.43	15395.3	19980.2	9030
[K].SAVGHEYQSKLSK.[H]	1xBiotin [K]	3	5	Q14247	Q14247 [98-110]	Q14247 1xBiotin [K]	Src substrate cortactin OS=Homo sapiens OX=9606 GN=CTTN PE=1 SV=2	1	1659.82	0.306	0.194	0.365	-1.71	-2.37	-1.45	0.000188528	3.0371e-06	0.000614014	0.00208005	7.21526e-05	0.00625731	148.5	178.7	141.1	45.4	34.6	51.5	141	150.4	127.4	169.6	146.2	292.1	133.9	116.3	153.4	47.8	36.7	43.1	35.5	29.5	32.9	34.3	61	48.9	9231.98	9847.43	8341.58	11110.7
[K].QTVKANTFGK.[A]	1xBiotin [K4]	1	4	Q7Z417	Q7Z417 [137-146]	Q7Z417 1xBiotin [K140]	Nuclear fragile X mental retardation-interacting protein 2 OS=Homo sapiens OX=9606 GN=NUFIP2 PE=1 SV=1	1	1319.68	0.241	0.194	0.307	-2.05	-2.37	-1.7	0.0646387	0.00818034	0.0594589	0.329361	0.0565842	0.309826	152.8	214.5	118	36.8	41.5	36.2	158.7	249.4	36.6	246.4	184.4	222.7	104.2	122.6	138.8	38.2	20.2	49.4	35	43.1	43.7	37.9	37.6	30.9	12914.5	20300.4	2982.45	20050.5
[K].GTWVQLKR.[Q]	1xBiotin [K7]	1	5	P46778	P46778 [123-130]	P46778 1xBiotin [K129]	60S ribosomal protein L21 OS=Homo sapiens OX=9606 GN=RPL21 PE=1 SV=2	1	1213.65	0.229	0.192	0.213	-2.13	-2.38	-2.23	0.00125162	0.00444443	0.00133056	0.010711	0.0333332	0.0122503	151.3	169.6	174.8	34.6	32.6	37.2	152.7	157.7	174.4	89	176.8	197.2	193.9	134.9	182.2	27.5	36.1	38.6	21.4	75.9	33.9	28.9	40.1	38.8	20021.3	20672.4	22864.9	11661.1
[K].IMSSPLSKELR.[Q]	1xBiotin [K8]; 1xOxidation [M2]	2	7	P61254	P61254 [29-39]	P61254 1xBiotin [K36]	60S ribosomal protein L26 OS=Homo sapiens OX=9606 GN=RPL26 PE=1 SV=1	1	1502.77	0.191	0.188	0.199	-2.39	-2.41	-2.33	2.04171e-06	2.43324e-06	2.33772e-06	5.67849e-05	6.44302e-05	7.61184e-05	144.5	152	206.3	27.5	28.6	41.2	194.1	140.2	140.2	147.5	173.3	139.6	200.3	171.1	216.1	26.3	30.1	26.7	34.8	27.8	22.3	40	23.9	45.9	17119	12359.2	12365.8	13008.6
[R].AYQKQPTIFQNK.[K]	1xBiotin [K4]	1	16	P62280	P62280 [9-20]	P62280 1xBiotin [K12]	40S ribosomal protein S11 OS=Homo sapiens OX=9606 GN=RPS11 PE=1 SV=3	1	1691.86	0.217	0.188	0.209	-2.2	-2.41	-2.26	0.0049261	0.00134223	0.00114105	0.0363334	0.0116356	0.0105785	159.9	167	171.1	34.7	31.4	35.8	118.1	150	152.4	216.9	124.8	156.7	285.1	135.2	160.6	32.6	22.5	46.4	17.4	29.5	49.1	20.1	33.6	49.3	19383.8	24627.9	25013.6	35601
[K].KVDQYKGK.[R]	1xBiotin [K6]	2	3	Q8NBS9	Q8NBS9 [273-280]	Q8NBS9 1xBiotin [K278]	Thioredoxin domain-containing protein 5 OS=Homo sapiens OX=9606 GN=TXNDC5 PE=1 SV=2	2	1191.62	0.093	0.188	0.228	-3.42	-2.41	-2.13	8.38744e-06	4.22532e-05	0.000123741	0.000157707	0.000600994	0.00154387	172.5	186.1	155	16.1	35	35.4	145.9	156.1	150.9	148.1	269.5	162.8	113.5	135.6	294.1	14	21.2	14.1	20.2	33.7	30.6	25.2	30.9	33.5	17058.7	18249.2	17638.6	17318.1
[R].SPAKTIAPQNAPR.[D]	1xBiotin [K4]	4	17	Q9NYF8	Q9NYF8 [300-312]	Q9NYF8 1xBiotin [K303]	Bcl-2-associated transcription factor 1 OS=Homo sapiens OX=9606 GN=BCLAF1 PE=1 SV=2	1	1576.83	0.179	0.188	0.297	-2.48	-2.41	-1.75	0.00461584	0.00765802	0.14289	0.0342341	0.053526	0.611404	187.1	192.8	116	33.5	36.2	34.4	125.3	194.8	220.3	118	200.7	222.5	119.6	120.8	162.3	9	34.8	42.6	13.4	38	37.7	28.5	76	35.9	25740.1	40001	45247.3	24241.6
[K].ISKGANPVEIR.[R]	1xBiotin [K3]	2	37	P10809	P10809 [131-141]	P10809 1xBiotin [K133]	60 kDa heat shock protein, mitochondrial OS=Homo sapiens OX=9606 GN=HSPD1 PE=1 SV=2	1	1409.76	0.182	0.188	0.217	-2.46	-2.41	-2.21	1.44069e-05	1.86559e-05	2.62515e-05	0.00023289	0.000323449	0.000434835	170.5	173.5	158.1	31	32.5	34.3	129	261.9	164.1	116.5	167	240.6	152.2	137.5	154.6	29.9	35.3	29.5	27.6	34.6	31.3	22.3	33	33	245945	499239	312869	222104
[R].KLILDSAR.[A]	1xBiotin [K1]	2	12	P29401	P29401 [543-550]	P29401 1xBiotin [K543]	Transketolase OS=Homo sapiens OX=9606 GN=TKT PE=1 SV=3	1	1141.64	0.144	0.185	0.246	-2.79	-2.44	-2.02	5.08895e-05	0.000157863	0.000261483	0.000647024	0.00180126	0.00298359	189.4	170.3	145.7	27.3	31.5	35.8	254.3	174.1	152.9	146.1	183.5	156.6	120	134	185.1	24	25.1	49	29	40.4	28.2	20.8	43.9	32.9	201079	137686	120935	115527
[R].KNPLPPSVGVVDK.[K]	1xBiotin [K1]	4	4	Q8NC51	Q8NC51 [79-91]	Q8NC51 1xBiotin [K79]	Plasminogen activator inhibitor 1 RNA-binding protein OS=Homo sapiens OX=9606 GN=SERBP1 PE=1 SV=2	1	1575.86	0.141	0.183	0.275	-2.82	-2.45	-1.86	0.189134	0.0207737	0.0520564	0.76282	0.127802	0.277981	170.2	171.6	159	24.1	31.3	43.8	27.6	169.7	188.2	117.6	301.3	171	120.6	158.5	247.1	23.9	44.6	24	20.2	42.6	31.2	22.3	43.6	45.8	1943.5	11964	13267.8	8292.42
[R].MPSLPSYKVGDK.[I]	1xBiotin [K]	2	15	P29401	P29401 [303-314]	P29401 1xBiotin [K]	Transketolase OS=Homo sapiens OX=9606 GN=TKT PE=1 SV=3	1	1547.76	0.143	0.179	0.216	-2.8	-2.48	-2.21	3.84383e-05	4.37945e-05	5.80364e-05	0.000508071	0.000615429	0.000790598	213.3	146.6	150.7	30.6	26.3	32.6	242.9	133.2	197.4	154.6	135.7	129.3	266.5	135.7	139.5	44.3	24.5	28.3	29.1	24.3	19.7	25	30.2	39.8	105928	58079.7	86077.9	67419.8
[R].TNSGGGDGPHISSKVR.[V]	1xBiotin [K14]	1	2	Q96EV2	Q96EV2 [971-986]	Q96EV2 1xBiotin [K984]	RNA-binding protein 33 OS=Homo sapiens OX=9606 GN=RBM33 PE=1 SV=3	1	1794.86	0.29	0.179	0.272	-1.79	-2.48	-1.88	0.00118976	0.000188958	0.00431315	0.0102473	0.00205089	0.0340713	150.5	178.7	153.6	43.6	31.9	41.7	141.2	180.5	130.2	104.5	167.7	325.6	115.7	144.1	161.9	42.8	25.7	41	22.6	30	43.8	38.4	39.2	45.3	11681.9	14926.8	10765.7	8638.98
[K].NSTFSEIFKK.[E]	1xBiotin [K9]	2	6	P29401	P29401 [344-353]	P29401 1xBiotin [K352]	Transketolase OS=Homo sapiens OX=9606 GN=TKT PE=1 SV=3	1	1426.7	0.177	0.177	0.132	-2.5	-2.5	-2.92	2.38869e-05	8.39259e-05	3.46798e-05	0.000342892	0.00104749	0.000532156	162.7	162.9	191.6	28.8	28.8	25.2	157.3	173.5	166.7	222.7	127.2	166.8	146.7	206.5	196.3	11.8	30.4	29.5	23.3	29.5	32.4	25.9	19.5	34	19012.5	20975	20152	26914.4
[K].GKDSLYAQGK.[R]	1xBiotin [K2]	1	6	P83881	P83881 [29-38]	P83881 1xBiotin [K30]	60S ribosomal protein L36a OS=Homo sapiens OX=9606 GN=RPL36A PE=1 SV=2	1	1292.63	0.186	0.175	0.252	-2.43	-2.52	-1.99	0.000197546	0.000210319	0.00113099	0.0021441	0.00222838	0.0105585	159.1	191.6	148.9	29.5	33.4	37.5	136.6	233.7	153.1	123.7	196	184.4	131.7	143.3	170.9	28.4	28	46.2	32.2	40.5	26.6	24.8	36.1	63.4	14457.4	24729.9	16203.4	13085.1
[R].AKVEFNIR.[K]	1xBiotin [K2]	4	24	Q8NC51	Q8NC51 [302-309]	Q8NC51 1xBiotin [K303]	Plasminogen activator inhibitor 1 RNA-binding protein OS=Homo sapiens OX=9606 GN=SERBP1 PE=1 SV=2	1	1202.64	0.259	0.174	0.194	-1.95	-2.53	-2.37	7.39928e-06	2.83647e-07	1.05558e-06	0.000147844	1.35239e-05	4.08044e-05	141.1	202.6	154.7	36.5	35.2	29.9	111.8	140	159.5	201.1	186.3	228.2	180	147.9	153.5	36.2	43.9	24.4	24.9	36	34.9	28.1	33.4	29.7	129702	162369	184957	233204
[K].FTPVASKFSPGAPGGSGSQPNQK.[L]	1xBiotin [K7]	2	6	Q15942	Q15942 [273-295]	Q15942 1xBiotin [K279]	Zyxin OS=Homo sapiens OX=9606 GN=ZYX PE=1 SV=1	1	2472.2	0.095	0.173	0.164	-3.4	-2.53	-2.61	2.65537e-06	9.10866e-05	1.61027e-05	6.95081e-05	0.00112593	0.000294482	171.7	180.1	172.5	16.2	31.2	28.2	134.1	168.9	204.6	150.3	191.3	177.1	169.7	182.4	154.3	16	15.8	31.5	30.5	58.5	30.7	30.9	25.7	27.8	21697.2	27321.2	33087.1	24304.2
[R].TAQKIMAPPGGR.[S]	1xBiotin [K4]	1	6	O14531	O14531 [554-565]	O14531 1xBiotin [K557]	Dihydropyrimidinase-related protein 4 OS=Homo sapiens OX=9606 GN=DPYSL4 PE=1 SV=2	1	1452.74	0.156	0.169	0.227	-2.69	-2.57	-2.14	0.000499368	0.000466738	0.00535522	0.00480279	0.00432705	0.0415652	135	196.3	174.9	21	33.1	39.7	96.5	298.6	113.4	312.8	165	164.1	105	151.6	147	17.6	13.9	37	27.8	26.6	30.4	33.4	21.8	37.6	10612.6	32822.7	12466.8	34385.5
[K].TELHGKMISVEK.[A]	1xBiotin [K6]	4	2	Q15424	Q15424 [470-481]	Q15424 1xBiotin [K475]	Scaffold attachment factor B1 OS=Homo sapiens OX=9606 GN=SAFB PE=1 SV=4	1	1597.81	0.158	0.167	0.208	-2.67	-2.59	-2.26	0.00261674	0.000123765	0.00388362	0.0206707	0.00144935	0.0312327	157.1	205.9	147.3	24.8	34.3	30.7	75.2	128.4	141	549.3	168.2	133.8	120.4	109.1	155.3	28.3	20.2	17.6	28.7	15.8	28	24.6	31	25.1	9965.93	17006.6	18669.2	72749.4
[R].LLVKNQDVSISNVQPK.[T]	1xBiotin [K4]	1	6	Q96EV2	Q96EV2 [874-889]	Q96EV2 1xBiotin [K877]	RNA-binding protein 33 OS=Homo sapiens OX=9606 GN=RBM33 PE=1 SV=3	1	2008.09	0.118	0.166	0.115	-3.09	-2.59	-3.12	9.21885e-09	7.38784e-08	1.03721e-08	2.05119e-06	7.75131e-06	2.76936e-06	190.9	145.7	194.3	22.5	24.2	22.4	159.1	220.7	184.6	140.3	149.7	140.9	182.1	220.8	187.8	23.5	21.3	21.7	32.3	23.4	19.6	21.7	21.6	29.1	16627.5	23071.6	19292.2	14668
[K].AYGQALAKLGHASDR.[I]	1xBiotin [K8]	2	19	P29401	P29401 [320-334]	P29401 1xBiotin [K327]	Transketolase OS=Homo sapiens OX=9606 GN=TKT PE=1 SV=3	1	1783.89	0.116	0.166	0.131	-3.1	-2.59	-2.93	1.72729e-05	0.000315014	3.57507e-06	0.000266369	0.00306967	0.000103755	185.8	144.7	197.9	21.6	24	25.9	218.2	128.5	182.8	148.9	90.7	142.4	304.3	194.7	181.2	24.4	21.3	19.2	23.3	23.6	33.1	25.5	11.4	26.5	93712.2	55179.5	78522.2	63951.1
[R].LKQQSELQSQVR.[Y]	1xBiotin [K2]	2	9	Q14847	Q14847 [74-85]	Q14847 1xBiotin [K75]	LIM and SH3 domain protein 1 OS=Homo sapiens OX=9606 GN=LASP1 PE=1 SV=2	1	1669.87	0.137	0.163	0.115	-2.87	-2.62	-3.12	1.75701e-05	9.93458e-06	8.53811e-06	0.000266546	0.000192212	0.000186859	164.2	214.5	146.9	22.5	34.9	16.9	141.1	164.8	198.6	162.5	277.3	215.3	125.2	147.4	166.6	22.6	23.2	20.8	36	35.1	12.9	14.7	18.8	17	15681.8	18316.3	22064.2	18059.6
[K].TGGDNKTLLHLGSSAPGK.[E]	1xBiotin [K6]	3	6	Q5SW79	Q5SW79 [712-729]	Q5SW79 1xBiotin [K717]	Centrosomal protein of 170 kDa OS=Homo sapiens OX=9606 GN=CEP170 PE=1 SV=1	1	1979	0.221	0.162	0.154	-2.18	-2.62	-2.69	0.00107758	0.000357829	0.000343366	0.00952698	0.00341215	0.00378838	158.9	214.2	136	35.1	34.8	21	148.4	157.7	150.7	112.8	312.5	203.1	129	108.4	186.3	39.6	33.3	29.3	48	33	27.7	41.1	19.9	19	12199.1	12964.2	12394.4	9279.31
[R].IMKAQAYQTGK.[DG]	1xBiotin [K3]; 1xOxidation [M2]	2	2	P14625	P14625 [661-671]	P14625 1xBiotin [K663]	Endoplasmin OS=Homo sapiens OX=9606 GN=HSP90B1 PE=1 SV=1	1	1480.73	0.211	0.162	0.168	-2.25	-2.63	-2.57	0.0375771	0.00938011	0.0156535	0.212565	0.0632447	0.103967	137.9	196.2	175.5	29.1	31.8	29.5	128.4	154.9	178.7	101.1	220.4	251.7	85.7	197.1	218.9	15.7	32.7	51	9.1	40.5	35.7	11.8	33.2	33.6	26408.8	31865.7	36753.3	20798.9
[K].GQQIGKVVQVYR.[K]	1xBiotin [K6]	2	25	P61254	P61254 [64-75]	P61254 1xBiotin [K69]	60S ribosomal protein L26 OS=Homo sapiens OX=9606 GN=RPL26 PE=1 SV=1	1	1600.86	0.165	0.161	0.173	-2.6	-2.64	-2.53	2.94785e-05	4.23172e-05	3.45271e-05	0.000412364	0.000600994	0.000532156	182.4	150.7	181.2	30.1	24.2	31.3	160.5	193	170.2	140.7	162.1	129.3	123	169.1	299.1	25	28.1	30.5	18.2	35.4	22.6	22.8	41.3	29.3	41408.1	49786.6	43926.1	36292.8
[R].YYKNIGLGFK.[T]	1xBiotin [K3]	1	29	P62280	P62280 [36-45]	P62280 1xBiotin [K38]	40S ribosomal protein S11 OS=Homo sapiens OX=9606 GN=RPS11 PE=1 SV=3	1	1428.73	0.152	0.159	0.219	-2.72	-2.65	-2.19	9.05813e-05	0.0003273	0.000145518	0.00111969	0.00316628	0.00178226	170.7	167.3	171.9	26	26.6	37.6	172	139.5	165.9	162.6	85.9	197.7	167.1	159.7	271.3	31.9	25.2	22.5	25.8	24.3	39.1	23.5	49.4	36.5	96704	78452.3	93275.9	91429.4
[R].KISSDLDGHPVPK.[Q]	1xBiotin [K1]	2	16	P29401	P29401 [102-114]	P29401 1xBiotin [K102]	Transketolase OS=Homo sapiens OX=9606 GN=TKT PE=1 SV=3	1	1618.83	0.109	0.157	0.204	-3.2	-2.68	-2.29	0.000152312	0.00259817	0.00229543	0.00173792	0.0215439	0.0202801	166.9	171.8	179.5	18.2	26.9	36.7	123	167.9	235.3	156.6	172.8	179.6	219	127.2	180.6	9.6	18.6	18.3	17.9	27.1	48.8	12.8	48	36.9	51305.2	70033.9	98134.2	65323.4
[R].LGKIVDR.[I]	1xBiotin [K3]	1	1	Q15293	Q15293 [84-90]	Q15293 1xBiotin [K86]	Reticulocalbin-1 OS=Homo sapiens OX=9606 GN=RCN1 PE=1 SV=1	1	1026.58	0.21	0.155	0.22	-2.25	-2.69	-2.18	5.76287e-06	3.98483e-06	3.6986e-05	0.000122118	8.76797e-05	0.000554789	179.5	173.4	149.7	37.7	26.8	32.9	177.2	175.5	241.4	144.2	189.1	171.2	83.9	174.8	147.7	37.2	31.1	42	25.7	37.2	26.5	33.6	29.3	32.5	17107.7	16943.9	23299.2	13920.5
[K].AYEIEKR.[TL]	1xBiotin [K6]	6	12	Q7Z417	Q7Z417 [564-570]	Q7Z417 1xBiotin [K569]	Nuclear fragile X mental retardation-interacting protein 2 OS=Homo sapiens OX=9606 GN=NUFIP2 PE=1 SV=1	1	1134.56	0.181	0.15	0.138	-2.47	-2.74	-2.85	0.000193273	0.000218981	0.00110539	0.00211492	0.0022662	0.0103922	147.8	211.5	160.1	26.7	31.7	22.2	327.2	139.8	133.2	178.5	200.2	211.8	83.9	151.5	155.8	32.4	25.3	13.7	30	31.7	15.9	31.7	16.4	21	39987.6	17090.9	16276.6	21820.1
[R].RPDQQLQGEGKIIDR.[R]	1xBiotin [K11]	4	38	Q8NC51	Q8NC51 [112-126]	Q8NC51 1xBiotin [K122]	Plasminogen activator inhibitor 1 RNA-binding protein OS=Homo sapiens OX=9606 GN=SERBP1 PE=1 SV=2	1	1979.01	0.139	0.149	0.227	-2.85	-2.75	-2.14	2.96531e-05	2.22983e-05	2.83821e-05	0.000412364	0.000368131	0.000451072	175.2	200.4	138.7	24.4	29.9	31.4	151.7	161.5	164.9	219.7	175.8	184.7	237.2	127	127.8	22.4	22.4	33.9	46.1	27.5	20.4	18.8	29	29.1	296370	315338	322105	429157
[K].GFVLHKSK.[S]	1xBiotin [K6]	4	6	Q8NC51	Q8NC51 [322-329]	Q8NC51 1xBiotin [K327]	Plasminogen activator inhibitor 1 RNA-binding protein OS=Homo sapiens OX=9606 GN=SERBP1 PE=1 SV=2	1	1141.62	0.141	0.146	0.137	-2.83	-2.78	-2.87	0.000839825	0.000344057	0.000425439	0.00762698	0.00330443	0.00461757	145	224.3	156.2	20.5	32.7	21.4	106.5	151	217.5	133.2	239.7	233.7	121.9	192.3	162.8	42.2	18.6	21.3	34.1	34.1	17.7	14.8	22.3	36.4	10488.5	14880.4	21425.3	13122.2
[R].IKVHAAADK.[H]	1xBiotin [K2]	1	3	O60563	O60563 [484-492]	O60563 1xBiotin [K485]	Cyclin-T1 OS=Homo sapiens OX=9606 GN=CCNT1 PE=1 SV=1	1	1178.64	0.234	0.145	0.235	-2.1	-2.79	-2.09	0.0874408	0.176126	0.0702621	0.430751	0.622033	0.351311	147	191.4	161.6	34.3	27.7	38	105.6	219	151.7	197.5	300	24.1	129.7	166.8	217.2	45.1	18.3	35.5	31.3	26.9	28.6	45.9	39.2	17.6	9400.46	19488.3	13497	17578.1
[R].AKTQTPPVSPAPQPTEER.[L]	1xBiotin [K2]	3	12	Q14247	Q14247 [397-414]	Q14247 1xBiotin [K398]	Src substrate cortactin OS=Homo sapiens OX=9606 GN=CTTN PE=1 SV=2	1	2160.08	0.157	0.144	0.225	-2.67	-2.8	-2.15	0.000845955	0.000278234	0.00157153	0.00763074	0.00277196	0.0142874	184.2	185.2	142.9	28.9	26.6	32.1	104.5	226.2	184.2	120.7	185.2	301.6	104.1	142.9	186.1	39	17.5	28.9	19	30.2	26.6	32.1	16.3	34.7	11001.3	23801.8	19387.3	12701.7
[K].KVVNPLFEK.[R]	1xBiotin [K1]	1	6	P62424	P62424 [26-34]	P62424 1xBiotin [K26]	60S ribosomal protein L7a OS=Homo sapiens OX=9606 GN=RPL7A PE=1 SV=2	1	1299.71	0.162	0.143	0.085	-2.62	-2.81	-3.56	0.000460201	0.000212212	2.45829e-05	0.00451742	0.00223073	0.000415419	175.2	142.7	215.1	28.4	20.4	18.2	161.8	150.4	200.2	128.5	192.3	131.8	195	203.6	198.6	54.6	20.2	26.2	16.4	40.1	18.8	16.8	16.2	28.4	27799.4	25844.8	34409.1	22076.7
[K].KGLDPYNVLAPK.[G]	1xBiotin [K1]	1	14	P10606	P10606 [57-68]	P10606 1xBiotin [K57]	Cytochrome c oxidase subunit 5B, mitochondrial OS=Homo sapiens OX=9606 GN=COX5B PE=1 SV=2	1	1540.82	0.148	0.14	0.124	-2.75	-2.83	-3.01	3.02396e-05	2.26118e-05	1.13303e-05	0.000416184	0.000368131	0.00022244	169.5	181.9	176.1	25.1	25.5	21.8	144.8	154.1	195.6	180.2	160.7	165.4	307.4	123.6	160.2	19.5	22.9	28.4	31.3	16.1	23.2	19.8	16.3	30.4	16611.8	17682.7	22438.3	20669.2
[K].ANTFGKAGIK.[T]	1xBiotin [K6]	1	4	Q7Z417	Q7Z417 [141-150]	Q7Z417 1xBiotin [K146]	Nuclear fragile X mental retardation-interacting protein 2 OS=Homo sapiens OX=9606 GN=NUFIP2 PE=1 SV=1	1	1232.65	0.095	0.14	0.164	-3.39	-2.83	-2.61	1.28119e-06	1.96762e-05	1.40118e-05	4.14438e-05	0.000336767	0.000263462	181.3	221.2	128.2	17.3	31	21.1	169.1	185.7	213.7	141.5	240.4	226.6	104.2	169.1	131.3	27.6	12.6	17.7	33.9	31.8	31.8	21.6	26.3	15.1	19738	21677.1	24946.2	16516
[K].APVLKMELDR.[S]	1xBiotin [K5]	4	8	Q8TAF3	Q8TAF3 [295-304]	Q8TAF3 1xBiotin [K299]	WD repeat-containing protein 48 OS=Homo sapiens OX=9606 GN=WDR48 PE=1 SV=1	1	1397.73	0.081	0.14	0.099	-3.63	-2.84	-3.34	1.12131e-05	2.29127e-05	1.90979e-05	0.000191917	0.000368536	0.000339942	195.3	190.4	156.5	15.7	26.6	15.5	134.3	231.1	162.7	390.8	158.6	127.5	188.2	127.7	130.4	20.5	13.1	11.5	23	22.2	15.5	12.9	12.1	17.8	38480.5	66180.3	46602.4	111939
[K].KSADTLWDIQK.[D]	1xBiotin [K1]	1	11	P07195	P07195 [319-329]	P07195 1xBiotin [K319]	L-lactate dehydrogenase B chain OS=Homo sapiens OX=9606 GN=LDHB PE=1 SV=2	1	1530.76	0.133	0.137	0.138	-2.91	-2.87	-2.86	0.000278683	8.39559e-05	0.000244176	0.00290658	0.00104749	0.00281013	189.2	164.3	174.7	25.2	22.4	24.1	144.4	152.2	188.8	468.3	101.7	132.2	165.7	139.9	140.5	20.3	14.4	25.6	20.9	18.1	13.1	12.9	21.6	19.4	24455.1	25777.8	31966.2	79312.2
[K].WGFTGQKTEEVK.[Q]	1xBiotin [K]	2	9	Q9NYU2	Q9NYU2 [1238-1249]	Q9NYU2 1xBiotin [K]	UDP-glucose:glycoprotein glucosyltransferase 1 OS=Homo sapiens OX=9606 GN=UGGT1 PE=1 SV=3	1	1635.78	0.082	0.134	0.116	-3.61	-2.9	-3.1	3.16285e-07	2.6521e-06	6.38442e-07	1.55927e-05	6.68029e-05	2.74942e-05	198.1	161.6	181.3	16.2	21.7	21.1	252.7	141.7	200	178.4	145.3	163.2	183.1	176	183.1	16.3	25.7	11.8	21.9	23.5	20.4	22.2	21.3	13.4	35514.9	19913.9	28118.5	25074.6
[R].TMKHTTDLDASK.[I]	1xBiotin [K3]; 1xOxidation [M2]	2	1	P12532	P12532 [137-148]	P12532 1xBiotin [K139]	Creatine kinase U-type, mitochondrial OS=Homo sapiens OX=9606 GN=CKMT1A PE=1 SV=1	1	1589.73	0.167	0.134	0.101	-2.59	-2.9	-3.31	1.35481e-05	4.00887e-06	5.3883e-06	0.000223293	8.76797e-05	0.000141047	174.6	166.3	188.8	29.1	22.3	19	245.5	153.7	132.9	299.6	132.8	146.4	122.7	166.3	216	18.9	25.6	25.9	19.6	18.1	19.7	16.8	16.6	22.9	37794.3	23671.2	20467.8	46121.6
[R].IPTPVIHTKH.[-]	1xBiotin [K9]	2	19	P12532	P12532 [408-417]	P12532 1xBiotin [K416]	Creatine kinase U-type, mitochondrial OS=Homo sapiens OX=9606 GN=CKMT1A PE=1 SV=1	1	1368.75	0.247	0.133	0.207	-2.02	-2.91	-2.27	0.00193899	8.27598e-05	0.000515528	0.016078	0.00104749	0.00541913	126.8	217.4	161.8	31.4	29	33.6	120.2	117.3	157	305.6	163.6	206.1	95	223.1	153.4	19.4	29.7	44.4	24.7	28.4	27.5	15.5	31.8	37	68311.2	66619.1	89215.3	173614
[R].QQEGFKGTFPDAR.[E]	1xBiotin [K6]	2	80	Q15233	Q15233 [366-378]	Q15233 1xBiotin [K371]	Non-POU domain-containing octamer-binding protein OS=Homo sapiens OX=9606 GN=NONO PE=1 SV=4	1	1706.8	0.094	0.132	0.082	-3.41	-2.92	-3.61	1.62875e-06	2.4027e-06	4.49395e-07	4.94178e-05	6.44302e-05	2.22201e-05	176.3	170.2	198.2	16.6	22.5	16.2	183.1	176.2	145.1	170	272.3	136.7	146.2	198	215.8	16.6	14.1	20.4	25.4	22.5	14.4	9.8	16.2	17.1	336636	323932	266733	312580
[K].TSGKFSGEELDK.[L]	1xBiotin [K4]	1	8	P30533	P30533 [160-171]	P30533 1xBiotin [K163]	Alpha-2-macroglobulin receptor-associated protein OS=Homo sapiens OX=9606 GN=LRPAP1 PE=1 SV=1	1	1523.7	0.138	0.129	0.174	-2.86	-2.95	-2.53	4.91127e-06	6.10098e-06	1.04909e-05	0.000111128	0.000127263	0.000218834	201	173.8	149.1	27.7	22.4	25.9	191.7	160.3	251.1	156.7	175.9	165.8	141.6	214.6	142.2	15.7	28.3	26.4	21.4	27.2	13.7	27.3	15.3	24.7	27176.8	22719.6	35589.2	22214.4
[K].TGFGGKFGVQSER.[Q]	1xBiotin [K6]	1	27	Q14247	Q14247 [267-279]	Q14247 1xBiotin [K272]	Src substrate cortactin OS=Homo sapiens OX=9606 GN=CTTN PE=1 SV=2	1	1595.76	0.109	0.126	0.111	-3.2	-2.99	-3.17	1.51757e-05	9.89971e-06	5.69591e-06	0.000241185	0.000192212	0.000143472	171.5	208.3	157.7	18.7	26.3	17.5	134	188.8	165	146.2	200.4	253.8	151.7	146	213.7	18	32.9	17.2	17	25.3	33	25	16.8	15.3	69327.8	97648.7	85365.5	75613.3
[-].MQSNKTFNLEK.[Q]	1xAcetyl [N-Term]; 1xBiotin [K5]	1	12	Q15233	Q15233 [1-11]	Q15233 1xAcetyl [N-Term]; 1xBiotin [K5]	Non-POU domain-containing octamer-binding protein OS=Homo sapiens OX=9606 GN=NONO PE=1 SV=4	1	1607.76	0.087	0.125	0.047	-3.52	-3	-4.4	1.84068e-05	3.99275e-05	1.50991e-06	0.000273034	0.000592258	5.30456e-05	137.4	134.3	286	12	16.8	13.5	117.9	146.6	153.6	120.7	143.3	174.2	334.4	305.1	156.5	21.2	11.6	12.8	18	15.8	20.4	14.5	24.5	8.9	19818	24654.7	25831.9	20293.3
[K].APVLKMELDR.[S]	1xBiotin [K5]; 1xOxidation [M6]	4	15	Q8TAF3	Q8TAF3 [295-304]	Q8TAF3 1xBiotin [K299]	WD repeat-containing protein 48 OS=Homo sapiens OX=9606 GN=WDR48 PE=1 SV=1	1	1413.72	0.078	0.124	0.105	-3.68	-3.01	-3.24	1.12051e-08	7.5481e-08	3.53675e-08	2.13698e-06	7.75131e-06	5.24618e-06	181.1	169	194.2	14.2	21	20.5	243.8	161	170.1	145.3	193	158.7	182.4	152.4	230.9	20.4	12.5	13.3	19.9	19	19.7	21.1	19.2	17.1	46459.9	30680.6	32415.2	27685
[K].AIVAGDQNVEYKGTVWHK.[D]	1xBiotin [K12]	5	3	Q13642	Q13642 [107-124]	Q13642 1xBiotin [K118]	Four and a half LIM domains protein 1 OS=Homo sapiens OX=9606 GN=FHL1 PE=1 SV=4	1	2241.11	0.335	0.124	0.336	-1.58	-3.01	-1.57	0.951035	0.574054	0.557696	1	1	1	107.9	159.8	206.8	36.1	19.8	69.6	158.6	31.6	95.9	142.1	30.5	290.3	214.5	144.1	184	22.7	112.2	32.1	16.6	134.9	17.6	73.3	37	61.9	16091.4	3200.43	9731.08	14413.3
[K].VVGAKVVTNAR.[S]	1xBiotin [K5]	5	15	Q15424	Q15424 [432-442]	Q15424 1xBiotin [K436]	Scaffold attachment factor B1 OS=Homo sapiens OX=9606 GN=SAFB PE=1 SV=4	1	1339.75	0.147	0.123	0.08	-2.77	-3.03	-3.64	0.000686552	0.000608068	0.000160458	0.00636491	0.00552225	0.00191528	156.3	190.8	191.2	23	23.4	15.3	124.2	147.2	208.9	126.6	180.2	179.6	150.1	337.2	180	8.3	21.6	28.7	8.1	28.5	22	13.3	21.2	14.4	34394.9	40746.5	57824.4	35042.4
[K].LPLLSKDSR.[F]	1xBiotin [K6]	2	7	P12532	P12532 [332-340]	P12532 1xBiotin [K337]	Creatine kinase U-type, mitochondrial OS=Homo sapiens OX=9606 GN=CKMT1A PE=1 SV=1	1	1254.69	0.139	0.122	0.13	-2.85	-3.04	-2.94	2.57423e-05	2.6424e-05	1.45466e-05	0.000365596	0.000419953	0.000269718	152.7	187	191.5	21.2	22.7	24.9	128.4	146.7	243.2	138.2	179.6	227.8	183.9	187.6	167.8	14.8	29.7	20.4	21.8	16.3	31.5	13	23.9	25.5	16488.7	18832	31225.1	17749.4
[K].QPAGKVQIVSK.[K]	1xBiotin [K5]	4	12	P27816	P27816 [987-997]	P27816 1xBiotin [K991]	Microtubule-associated protein 4 OS=Homo sapiens OX=9606 GN=MAP4 PE=1 SV=3	1	1380.77	0.112	0.122	0.18	-3.16	-3.04	-2.48	4.1922e-07	1.26303e-06	1.08935e-05	1.64606e-05	3.83214e-05	0.00022244	196.6	189.4	143.2	22.1	23	25.7	198	249.4	140.5	197.5	189.6	190.6	93.6	144.2	186.8	22.9	14.7	22.2	23.2	29	21.9	28.2	25.9	21.9	28333.4	35694	20101.9	28270.4
[R].KAYGQALAK.[L]	1xBiotin [K1]	2	17	P29401	P29401 [319-327]	P29401 1xBiotin [K319]	Transketolase OS=Homo sapiens OX=9606 GN=TKT PE=1 SV=3	1	1175.62	0.071	0.118	0.105	-3.82	-3.08	-3.26	7.99397e-06	5.18142e-05	4.06563e-05	0.000152456	0.000713113	0.000596441	187.5	197.7	161.4	13.3	23.3	16.9	158.7	180.8	258	158.7	190.7	220.4	151	155.6	177	8.3	12.8	17.3	8.8	32.9	22.5	11	19.2	16.3	98986.8	112766	160871	98963.4
[K].LQALKDTANR.[L]	1xBiotin [K5]	2	27	P29401	P29401 [12-21]	P29401 1xBiotin [K16]	Transketolase OS=Homo sapiens OX=9606 GN=TKT PE=1 SV=3	1	1355.71	0.208	0.116	0.169	-2.26	-3.1	-2.56	0.0145069	0.000248637	0.000381277	0.0940132	0.00253382	0.00417217	149.6	204.7	163.1	31.2	23.8	27.6	124.4	147.2	148.3	170	201.4	224.7	134.8	160.5	180.3	30.7	27.7	86.4	23.4	45	19.9	15.7	32.5	27.2	104857	124062	125012	143288
[R].SQSKSPTGTPAR.[V]	1xBiotin [K4]	1	9	Q13595	Q13595 [16-27]	Q13595 1xBiotin [K19]	Transformer-2 protein homolog alpha OS=Homo sapiens OX=9606 GN=TRA2A PE=1 SV=1	1	1442.71	0.096	0.112	0.194	-3.38	-3.16	-2.37	7.9763e-06	1.68641e-05	9.60023e-05	0.000152456	0.000303402	0.0012206	196.2	170.1	164.1	18.8	19	31.8	262.8	126.2	180.5	133.7	156.5	174	136	286.6	151	17.3	10.9	26.8	20.9	17.5	13.8	29.2	29.9	26.3	35038.2	16827	24064.7	17821.6
[K].FGFAIGSQTTKK.[A]	1xBiotin [K]	2	10	Q8WW12	Q8WW12 [71-82]	Q8WW12 1xBiotin [K]	PEST proteolytic signal-containing nuclear protein OS=Homo sapiens OX=9606 GN=PCNP PE=1 SV=2	1	1510.77	0.13	0.112	0.152	-2.94	-3.16	-2.72	1.73589e-05	1.70451e-05	1.85598e-05	0.000266369	0.000303402	0.000334828	166.7	209.6	155.1	21.7	23.4	23.5	114.1	182.7	172.7	130.6	217.1	217.6	160.6	131.8	256.6	24.2	17.1	22.4	30.3	24.2	21.5	17.1	35.1	24.4	16328.3	26153.5	24720.6	18694.2
[K].ESWHGKPLPK.[N]	1xBiotin [K]	2	4	P29401	P29401 [255-264]	P29401 1xBiotin [K]	Transketolase OS=Homo sapiens OX=9606 GN=TKT PE=1 SV=3	0	1404.71	0.078	0.112	0.11	-3.69	-3.16	-3.18	1.02764e-05	1.48732e-05	1.31295e-05	0.000178168	0.000271997	0.000250398	166.1	214.4	164.5	12.9	23.9	18.1	164.8	135.2	215.5	223.2	194.7	212.7	130.4	163.2	179.9	12.8	11	35.9	23.7	18.8	27.6	14.4	18	18.2	29425.4	24149.8	38489.6	39854
[R].KPESNAVTKTAGPIASAQK.[Q]	1xBiotin [K9]	4	13	P27816	P27816 [968-986]	P27816 1xBiotin [K976]	Microtubule-associated protein 4 OS=Homo sapiens OX=9606 GN=MAP4 PE=1 SV=3	1	2124.11	0.082	0.11	0.094	-3.6	-3.19	-3.41	5.4377e-07	2.77252e-07	5.36506e-07	2.01648e-05	1.35239e-05	2.46978e-05	205.4	188.1	154.4	16.9	20.6	14.5	160.9	226.6	202.2	184.8	236.1	185.2	140.5	167.6	152	21.2	15	16.7	20.7	20.3	8.9	11.1	16.1	14.3	27572.3	38817.6	34634.4	31652.2
[K].AFGQAKHQPTAIIAK.[T]	1xBiotin [K6]	2	22	P29401	P29401 [227-241]	P29401 1xBiotin [K232]	Transketolase OS=Homo sapiens OX=9606 GN=TKT PE=1 SV=3	1	1806.97	0.085	0.109	0.088	-3.55	-3.19	-3.5	7.75798e-06	1.41445e-05	4.72158e-06	0.000152307	0.000262263	0.000128639	180.1	211.8	155.8	15.4	23.2	13.7	136.7	173.4	163	133.4	191.6	306.4	122.4	141	304.2	8.8	14.3	13.9	22.7	11.5	21	10	13.3	12.4	162416	206101	193679	158579
[K].EAGGGGVGGPGAKSAAQAAAQTNSNAAGK.[Q]	1xBiotin [K13]	4	7	Q8NC51	Q8NC51 [40-68]	Q8NC51 1xBiotin [K52]	Plasminogen activator inhibitor 1 RNA-binding protein OS=Homo sapiens OX=9606 GN=SERBP1 PE=1 SV=2	1	2681.27	0.184	0.108	0.2	-2.44	-3.21	-2.32	0.0201759	0.00450989	0.112099	0.12299	0.0336352	0.507527	156.9	207.1	153.9	28.9	22.4	30.8	167.9	150.5	177.5	221.7	262.4	196.5	22.4	192.7	164.8	30.9	33.2	21.8	29.3	24	24	32.9	12.7	34.4	20152	18061.1	21304.6	26609.7
[K].WTSQHSNTQTLGK.[-]	1xBiotin [K13]	2	9	Q6PKG0	Q6PKG0 [1084-1096]	Q6PKG0 1xBiotin [K1096]	La-related protein 1 OS=Homo sapiens OX=9606 GN=LARP1 PE=1 SV=2	0	1713.8	0.191	0.107	0.23	-2.39	-3.22	-2.12	9.52981e-05	1.80286e-05	0.000538807	0.00116425	0.000316687	0.00557603	195	160.5	154.6	37.2	17.2	35.5	139.6	222.8	207.5	110	196.5	170.8	123.4	167.7	164.6	29.3	40.5	39.6	38.1	18.3	16	35.2	42.4	37.8	13034.3	20806.9	19377.5	10270.3
[K].SAVGFDYQGKTEK.[H]	1xBiotin [K10]	3	5	Q14247	Q14247 [172-184]	Q14247 1xBiotin [K181]	Src substrate cortactin OS=Homo sapiens OX=9606 GN=CTTN PE=1 SV=2	1	1655.77	0.138	0.107	0.241	-2.86	-3.23	-2.05	5.05088e-06	4.07202e-06	0.000229832	0.000112382	8.76797e-05	0.00266805	213.8	185	122.4	29.5	19.8	29.5	335.8	139.8	207.4	179.4	208.4	138.7	111.8	118.8	123	23.8	28.6	30.6	31.6	16.2	19.2	28.6	32.7	25.7	37300.1	15533.1	23036.5	19929
[R].LAYIAHPKLGK.[R]	1xBiotin [K]	1	24	P47914	P47914 [96-106]	P47914 1xBiotin [K]	60S ribosomal protein L29 OS=Homo sapiens OX=9606 GN=RPL29 PE=1 SV=2	1	1436.81	0.128	0.107	0.156	-2.97	-3.23	-2.68	0.0156177	0.0291824	0.00880516	0.0988134	0.165781	0.0635399	162.4	194.8	174.1	20.7	20.8	27.2	104.1	160.4	209.5	130.6	227.2	192.5	149.3	267	172	5.6	26.1	20.5	20.5	23.1	19.9	2.9	26.9	42	74118.4	114258	149243	93045.3
[K].TKNFIQK.[N]	1xBiotin [K2]	1	1	Q7Z417	Q7Z417 [151-157]	Q7Z417 1xBiotin [K152]	Nuclear fragile X mental retardation-interacting protein 2 OS=Homo sapiens OX=9606 GN=NUFIP2 PE=1 SV=1	1	1104.59	0.201	0.104	0.272	-2.32	-3.26	-1.88	0.000429104	1.05967e-05	0.00317866	0.00427503	0.000202093	0.0265219	176.5	226.8	108.2	35.5	23.7	29.4	98.3	177.7	239.2	179.2	269	228.3	72.9	108.9	139.3	45.7	29.9	35.7	23.8	21.8	33.2	29.6	40.8	26.7	7133.91	12894.1	17357.5	13006.4
[R].TMKHTTDLDASK.[I]	1xBiotin [K3]	2	8	P12532	P12532 [137-148]	P12532 1xBiotin [K139]	Creatine kinase U-type, mitochondrial OS=Homo sapiens OX=9606 GN=CKMT1A PE=1 SV=1	1	1573.73	0.084	0.103	0.165	-3.57	-3.29	-2.6	6.80507e-05	0.000140358	0.000165142	0.000849044	0.00161532	0.00193732	150	218.6	168.4	12.7	22.4	27.8	105.2	199	139	105.1	202.5	287.8	140.6	156	277.6	24.4	11.7	11.6	27	20.3	20.8	25.8	28.8	16.9	14152.1	26776.8	18700.4	14148.8
[K].EKGTWVQLK.[R]	1xBiotin [K2]	1	7	P46778	P46778 [121-129]	P46778 1xBiotin [K122]	60S ribosomal protein L21 OS=Homo sapiens OX=9606 GN=RPL21 PE=1 SV=2	1	1314.69	0.06	0.102	0.089	-4.06	-3.29	-3.49	1.81228e-08	1.35894e-07	1.3108e-07	2.68822e-06	9.54832e-06	8.74958e-06	230.4	189.1	135.3	13.8	19.3	12	262.3	184	238.1	197.7	175.8	195.5	139.8	180.2	90	12.9	14.8	14.3	20	21.2	14.8	12.4	16.3	10.1	47922.8	33619.7	43510.7	36122.4
[K].SKGVPVISVK.[T]	1xBiotin [K2]	4	14	Q15424	Q15424 [569-578]	Q15424 1xBiotin [K570]	Scaffold attachment factor B1 OS=Homo sapiens OX=9606 GN=SAFB PE=1 SV=4	1	1239.71	0.093	0.101	0.127	-3.43	-3.31	-2.98	1.01632e-05	4.20116e-05	3.50976e-05	0.000178168	0.000600994	0.000532446	179.3	177.6	185.1	16.7	17.9	23.5	132.8	177	212	127.9	238.5	175.3	109.3	182.8	266.3	11.5	19.3	16.5	17.2	32.6	17.7	15.5	23.2	24.5	47963.1	63947.3	76598.7	46203.1
[K].KLSSWDQAETPGHTPSLR.[W]	1xBiotin [K1]	1	14	O75533	O75533 [214-231]	O75533 1xBiotin [K214]	Splicing factor 3B subunit 1 OS=Homo sapiens OX=9606 GN=SF3B1 PE=1 SV=3	1	2236.08	0.064	0.1	0.058	-3.96	-3.33	-4.1	1.20064e-05	3.95136e-05	8.05274e-06	0.000202893	0.000592258	0.000185224	173.1	157.2	229.6	11.1	15.7	13.4	159.7	172.5	207.5	237.1	125.6	156.7	251.7	135.7	228.8	15.7	9.9	11.1	24.3	9	15.6	13.3	6.9	18.9	42274.4	45672.6	54933.9	62766.7
[R].KGLFFEHDLR.[G]	1xBiotin [K1]	1	9	O15234	O15234 [185-194]	O15234 1xBiotin [K185]	Protein CASC3 OS=Homo sapiens OX=9606 GN=CASC3 PE=1 SV=2	1	1487.75	0.078	0.098	0.069	-3.67	-3.35	-3.87	8.80257e-06	0.000109762	7.83952e-06	0.000160979	0.00132011	0.00018361	190.9	164.5	199.8	15	16.2	13.7	156.6	307.9	171.3	199.5	61.5	147.6	308.2	154.6	179.2	14.2	9	13.4	14.5	16	10.4	12.3	8.8	15	40967.2	80534.4	44805.1	52176.9
[K].ILQLKESR.[Q]	1xBiotin [K5]	1	8	Q13435	Q13435 [276-283]	Q13435 1xBiotin [K280]	Splicing factor 3B subunit 2 OS=Homo sapiens OX=9606 GN=SF3B2 PE=1 SV=2	1	1212.68	0.057	0.096	0.1	-4.12	-3.38	-3.33	1.27574e-07	1.12514e-06	3.59584e-07	9.4617e-06	3.57633e-05	2.00019e-05	206.6	183.1	164.4	11.8	17.6	16.4	242.4	198.6	169	150.7	218	176	152.2	158.1	198.8	16.3	11.4	10.5	16.9	26	13.7	15.8	16.8	8.9	45329.7	37135.8	31600.9	28172.9
[K].ALGAKHCVK.[E]	1xBiotin [K5]; 1xCarbamidomethyl [C7]	4	7	A0A0B4J2D5	A0A0B4J2D5 [215-223]	A0A0B4J2D5 1xBiotin [K219]	Putative glutamine amidotransferase-like class 1 domain-containing protein 3B, mitochondrial OS=Homo sapiens OX=9606 GN=GATD3B PE=5 SV=1	1	1209.62	0.174	0.096	0.125	-2.53	-3.39	-3	1.27003e-05	6.0115e-07	2.42729e-06	0.000211936	2.25463e-05	7.71532e-05	124	227.2	182.7	21.5	21.7	22.8	104.9	181.7	112.7	313	187.1	206.4	187.9	164.6	166	16.2	19.6	23.4	13.4	24.7	19.7	24.6	20.7	13.4	15337.4	26578.8	16478	45767.5
[R].MPSLPSYKVGDK.[I]	1xBiotin [K8]; 1xOxidation [M1]	2	11	P29401	P29401 [303-314]	P29401 1xBiotin [K310]	Transketolase OS=Homo sapiens OX=9606 GN=TKT PE=1 SV=3	1	1563.75	0.081	0.095	0.073	-3.63	-3.39	-3.77	5.51161e-08	2.27644e-07	5.02114e-08	5.50256e-06	1.32888e-05	5.58602e-06	196	187.1	170.7	15.8	17.8	12.5	291.3	154.2	181.1	172.8	222.2	157.9	145.6	157.7	180.6	14.6	13	17.3	16.5	14.7	25.3	10	11.6	13.7	59764.6	31648.7	37155.7	35459.3
[K].DVTFNLKIR.[D]	1xBiotin [K7]	7	4	Q96SU4	Q96SU4 [671-679]	Q96SU4 1xBiotin [K677]	Oxysterol-binding protein-related protein 9 OS=Homo sapiens OX=9606 GN=OSBPL9 PE=1 SV=2	1	1331.71	0.089	0.095	0.119	-3.5	-3.4	-3.07	4.131e-07	1.07753e-06	1.06978e-06	1.64606e-05	3.50853e-05	4.08044e-05	213.6	148.2	183.4	18.9	14	21.9	235.9	198.6	214	155.2	148.4	136.3	171.7	186.6	183.8	19.5	19	18.8	14	12.1	23.4	11.7	28.9	21.9	30885	25999.1	28015.3	20321.5
[R].EKGPDPLQYMR.[A]	1xBiotin [K2]	3	14	P02458	P02458 [1230-1240]	P02458 1xBiotin [K1231]	Collagen alpha-1(II) chain OS=Homo sapiens OX=9606 GN=COL2A1 PE=1 SV=3	1	1559.73	0.082	0.094	0.122	-3.61	-3.4	-3.03	4.31367e-05	3.88072e-05	5.01138e-05	0.000559101	0.000588723	0.000696895	203.5	181	161.9	16.7	17.1	19.8	120.1	183.4	192	158.1	163.1	191.5	353	139.9	145.9	15	24.1	9.2	24.2	15.4	9.7	20.2	17.8	17.5	19317	29499.2	30885.2	25427.7
[K].HQPTAIIAKTFK.[G]	1xBiotin [K]	2	44	P29401	P29401 [233-244]	P29401 1xBiotin [K]	Transketolase OS=Homo sapiens OX=9606 GN=TKT PE=1 SV=3	1	1580.86	0.115	0.092	0.147	-3.12	-3.44	-2.76	2.5559e-06	6.0799e-07	2.68122e-06	6.93878e-05	2.25463e-05	8.32425e-05	178.7	185.6	172.6	20.6	17.1	25.4	166.8	182.4	165.7	173.2	171	173.5	151.5	284.7	161	19.2	18.4	20.5	16	21.9	8.4	23.7	18	24.1	183579	200834	182385	190665
[R].SGKPAELLK.[M]	1xBiotin [K3]	2	18	P29401	P29401 [595-603]	P29401 1xBiotin [K597]	Transketolase OS=Homo sapiens OX=9606 GN=TKT PE=1 SV=3	0	1168.64	0.102	0.092	0.146	-3.3	-3.44	-2.78	0.0006804	0.00424996	0.0144021	0.00635198	0.0321588	0.0961338	136.7	237.1	166.2	13.9	21.8	24.3	203.6	132.5	135.1	234.3	240.6	211.3	119.1	178.7	164.2	2.1	13.8	24.7	21.5	28.6	20	13.1	32.9	24	185437	120732	123066	213396
[K].SNYKMMFVK.[S]	1xBiotin [K4]; 2xOxidation [M5; M6]	1	6	O00193	O00193 [171-179]	O00193 1xBiotin [K174]	Small acidic protein OS=Homo sapiens OX=9606 GN=SMAP PE=1 SV=1	1	1405.63	0.078	0.091	0.098	-3.67	-3.46	-3.35	1.57627e-06	2.60666e-06	6.29162e-06	4.89376e-05	6.68029e-05	0.000152715	271.1	168.4	112.9	21.2	15.3	11.1	268.6	351.6	161.3	166.9	190.5	149.2	93.3	111.9	172.6	21.1	24.4	11	10.8	15.5	15.1	11	14.6	10.8	40552.6	53076.5	24346.6	25199
[R].YESLKGVDPK.[F]	1xBiotin [K5]	1	40	P47914	P47914 [29-38]	P47914 1xBiotin [K33]	60S ribosomal protein L29 OS=Homo sapiens OX=9606 GN=RPL29 PE=1 SV=2	1	1361.68	0.062	0.09	0.097	-4	-3.47	-3.37	5.77047e-08	2.39067e-07	3.94559e-07	5.50256e-06	1.32981e-05	2.09634e-05	200	195.1	159.4	12.5	17.6	15.4	143.4	270.9	204.1	149.8	210.9	199.1	137.1	162.6	170.2	12.7	12.7	19	17.9	19.5	17.5	13.5	15.7	23.4	771591	1.45759e+06	1.09816e+06	805832
[R].AQGGQTQSPTKSHTPSPTSPK.[S]	1xBiotin [K]	2	11	P40123	P40123 [294-314]	P40123 1xBiotin [K]	Adenylyl cyclase-associated protein 2 OS=Homo sapiens OX=9606 GN=CAP2 PE=1 SV=1	1	2348.13	0.075	0.089	0.12	-3.74	-3.49	-3.06	3.53351e-07	4.15582e-07	1.10224e-06	1.55927e-05	1.73376e-05	4.08748e-05	165.2	193.9	188.7	12.4	17.2	22.7	159.2	136.4	180.9	224.3	186.9	155.8	231.3	181.3	181.9	10.8	11.9	20.4	13.3	16.6	21.9	21.9	29.3	16.2	28882.3	24740.7	32802.6	40679.3
[K].QLEIAHEKLR.[H]	1xBiotin [K8]	1	7	P30533	P30533 [297-306]	P30533 1xBiotin [K304]	Alpha-2-macroglobulin receptor-associated protein OS=Homo sapiens OX=9606 GN=LRPAP1 PE=1 SV=1	1	1462.78	0.138	0.085	0.141	-2.86	-3.56	-2.83	1.80627e-07	1.02031e-08	1.25463e-07	1.14827e-05	1.94589e-06	8.74958e-06	153.2	216.3	167.6	21.1	18.3	23.6	172.8	151.9	128.4	237	214.5	189.1	166.2	142.5	202.1	27.2	20.9	19.7	18.2	16.8	19.8	17.9	23.4	31.7	20938.4	18408.6	15567.1	28720.8
[K].IVPKISYASK.[V]	1xBiotin [K4]	1	2	Q7Z417	Q7Z417 [352-361]	Q7Z417 1xBiotin [K355]	Nuclear fragile X mental retardation-interacting protein 2 OS=Homo sapiens OX=9606 GN=NUFIP2 PE=1 SV=1	1	1331.74	0.096	0.084	0.107	-3.38	-3.57	-3.23	7.19856e-06	2.93268e-06	1.85253e-06	0.000147844	7.21526e-05	6.34137e-05	155.3	224.6	168.4	14.9	18.9	18	112.9	151	155	229.6	218.4	177.9	156	163.7	277.6	14.5	10.9	23.7	24.7	15.6	18.4	11	17.5	21.5	15546.3	20793.6	21336	31612.5
[K].HEQKHTLQQHQETPK.[K]	1xBiotin [K4]	2	1	Q7Z417	Q7Z417 [75-89]	Q7Z417 1xBiotin [K78]	Nuclear fragile X mental retardation-interacting protein 2 OS=Homo sapiens OX=9606 GN=NUFIP2 PE=1 SV=1	1	2095.01	1.167	0.084	0.317	0.22	-3.58	-1.66	0.652465	2.35091e-06	0.000603327	1	6.44302e-05	0.0061957	38.8	318.6	129.7	45.3	26.6	41.1	21.2	41	37.1	275.3	321.9	304.9	200.2	123.8	124.1	43.3	47.9	41.7	49.7	23.3	25.5	39.3	46.8	32.9	1593.97	3085.53	2797.07	20745.4
[R].TETGTPWKTK.[Y]	1xBiotin [K]	1	6	Q9BXB4	Q9BXB4 [712-721]	Q9BXB4 1xBiotin [K]	Oxysterol-binding protein-related protein 11 OS=Homo sapiens OX=9606 GN=OSBPL11 PE=1 SV=2	1	1374.67	0.066	0.08	0.126	-3.93	-3.64	-2.99	0.277553	0.482065	0.72467	1	1	1	159.3	218	173.1	10.4	17.4	21.8	27.1	198.8	257.2	19	313.7	272	16	268.3	216.1	13	23.2	13	19.8	33	21.8	26.2	34.7	27.1	3145.97	23090.1	29870.2	2209.84
[K].SAAQAAAQTNSNAAGKQLR.[K]	1xBiotin [K16]	4	11	Q8NC51	Q8NC51 [53-71]	Q8NC51 1xBiotin [K68]	Plasminogen activator inhibitor 1 RNA-binding protein OS=Homo sapiens OX=9606 GN=SERBP1 PE=1 SV=2	1	2084.03	0.204	0.08	0.191	-2.3	-3.65	-2.39	0.00133523	7.23968e-05	0.000813979	0.011291	0.000956928	0.00793112	169.2	237.7	117.3	34.5	19	22.4	97.1	406.4	145.2	204	210.5	165.5	96.1	100.6	187.8	29.6	41.4	17.6	16.3	12.1	17.4	20.9	19.2	12.2	19329.1	80893.4	28906.8	40602.3
[K].STQPISSVGKPASVIK.[N]	1xBiotin [K]	3	6	Q7Z6E9	Q7Z6E9 [1335-1350]	Q7Z6E9 1xBiotin [K]	E3 ubiquitin-protein ligase RBBP6 OS=Homo sapiens OX=9606 GN=RBBP6 PE=1 SV=1	0	1824.99	0.123	0.08	0.136	-3.02	-3.65	-2.88	1.45667e-07	2.62621e-08	2.6023e-07	9.72326e-06	3.89554e-06	1.51046e-05	180.3	186.1	173.1	22.2	14.8	23.5	174.7	177	179.9	177.9	182.7	184	146.3	242.2	169.9	22.1	14.1	21.8	9.8	14.5	17.2	23.1	24.7	18	29329.9	29716.2	30207.4	29877.8
[-].MATAEVLNIGKK.[L]	1xBiotin [K]; 1xMet-loss+Acetyl [N-Term]	2	13	P22234	P22234 [1-12]	P22234 1xBiotin [K]; 1xMet-loss+Acetyl [N-Term]	Multifunctional protein ADE2 OS=Homo sapiens OX=9606 GN=PAICS PE=1 SV=3	1	1411.76	0.055	0.078	0.111	-4.19	-3.67	-3.17	1.80273e-06	5.18885e-06	5.37731e-06	5.31635e-05	0.000109954	0.000141047	185.1	211.7	158.8	10.1	16.6	17.6	166.8	189.4	155	190.7	227.6	145.4	327.3	130.4	143.1	14.4	8.8	9.1	11.4	19.1	15	9.9	20.6	15.9	29396.1	33388	27316.4	33613
[K].YKEETIEK.[M]	1xBiotin [K2]	1	8	P61254	P61254 [135-142]	P61254 1xBiotin [K136]	60S ribosomal protein L26 OS=Homo sapiens OX=9606 GN=RPL26 PE=1 SV=1	1	1265.61	0.109	0.078	0.093	-3.2	-3.68	-3.42	0.000698397	0.000266587	0.00558254	0.00643007	0.00267589	0.0428316	150	191.5	207.8	16.3	14.9	19.4	143	168	137.9	182.5	206.2	161.7	135.9	256.1	198.1	10.9	15.5	15.9	14.2	22.3	7.1	90	16.2	18.5	31741.3	37297	30627.1	40518.9
[K].GFGGKYGIDK.[D]	1xBiotin [K5]	3	9	Q14247	Q14247 [194-203]	Q14247 1xBiotin [K198]	Src substrate cortactin OS=Homo sapiens OX=9606 GN=CTTN PE=1 SV=2	1	1267.61	0.128	0.077	0.084	-2.97	-3.69	-3.57	3.8832e-07	9.85406e-08	7.03558e-08	1.62002e-05	8.22198e-06	5.87031e-06	152	217.9	178.7	19.4	16.9	15.1	134.4	146.8	204.4	268.6	210.4	179	165.8	172.6	182.3	19.4	11.3	18.8	16.3	14.8	17.7	14.7	14.6	8.2	26733.3	29185.9	40640	53413.1
[R].SELELLKLR.[S]	1xBiotin [K7]	1	16	Q8IYS1	Q8IYS1 [18-26]	Q8IYS1 1xBiotin [K24]	Xaa-Arg dipeptidase OS=Homo sapiens OX=9606 GN=PM20D2 PE=1 SV=2	1	1326.74	0.04	0.077	0.065	-4.65	-3.7	-3.95	1.44793e-05	3.0822e-05	1.11102e-05	0.00023289	0.000484086	0.00022244	267.1	133.2	167.9	10.7	10.3	10.8	234.9	124.6	237.1	171.3	117.2	108.2	435.6	135.3	147.6	12.3	8.5	9.4	10	6.4	9	6	9.5	17.2	87355.1	46345.8	88206.1	63710.8
[K].LNQLWEKAQR.[L]	1xBiotin [K7]	1	8	P30533	P30533 [59-68]	P30533 1xBiotin [K65]	Alpha-2-macroglobulin receptor-associated protein OS=Homo sapiens OX=9606 GN=LRPAP1 PE=1 SV=1	1	1511.78	0.12	0.077	0.117	-3.06	-3.7	-3.1	4.67457e-08	6.89652e-09	3.24166e-08	5.20046e-06	1.53448e-06	5.24618e-06	158.2	213.6	172.7	18.9	16.4	20.2	159.6	163.1	171.9	180.6	220.4	221.5	178.1	136.8	194.8	19.5	16.5	26.3	13.7	16.9	21.7	16.6	20.8	21.2	27586.2	28200.3	29713.8	31221
[K].LKLDGLDEDGEK.[E]	1xBiotin [K2]	1	8	P30533	P30533 [96-107]	P30533 1xBiotin [K97]	Alpha-2-macroglobulin receptor-associated protein OS=Homo sapiens OX=9606 GN=LRPAP1 PE=1 SV=1	1	1557.75	0.107	0.073	0.172	-3.22	-3.78	-2.54	1.54738e-05	1.52093e-06	8.57178e-05	0.00024303	4.32008e-05	0.00110032	176	227.1	137.8	18.8	16.5	23.7	144.9	169.9	165.5	389	213.6	153	155.8	95.9	129.6	16.4	17.7	28.1	14.5	25	15.5	18	22.3	25.3	20424	23938.9	23325.4	54819.7
[-].MKFNPFVTSDR.[S]	1xBiotin [K2]; 1xOxidation [M1]	2	19	P61254	P61254 [1-11]	P61254 1xBiotin [K2]	60S ribosomal protein L26 OS=Homo sapiens OX=9606 GN=RPL26 PE=1 SV=1	1	1583.73	0.068	0.07	0.073	-3.87	-3.83	-3.79	1.84408e-06	3.95042e-06	4.30225e-06	5.31635e-05	8.76797e-05	0.000119656	213.1	168.2	179.3	14.6	11.8	13	133.5	306.7	219.6	173.3	127.8	191.5	119.1	184.8	228.1	8.1	16.7	15	8.4	16.4	12.2	13.4	13.8	11.5	34780.5	79920.5	57236.8	45162
[R].EKGPDPLQYMR.[A]	1xBiotin [K2]; 1xOxidation [M10]	3	9	P02458	P02458 [1230-1240]	P02458 1xBiotin [K1231]	Collagen alpha-1(II) chain OS=Homo sapiens OX=9606 GN=COL2A1 PE=1 SV=3	1	1575.73	0.052	0.069	0.118	-4.26	-3.85	-3.09	6.08753e-07	3.24079e-06	2.63921e-05	2.19645e-05	7.4594e-05	0.000434835	277.4	167.7	115.2	14.5	11.7	13.6	280	340.2	180.9	169.3	159.3	181	106.1	116.2	136.1	19.8	14.6	8.3	11.8	9.3	22	18.5	12.9	13.7	52866.8	64230	34157	31970.6
[R].CGKIVYPTEK.[V]	1xBiotin [K3]; 1xCarbamidomethyl [C1]	2	7	Q14847	Q14847 [8-17]	Q14847 1xBiotin [K10]	LIM and SH3 domain protein 1 OS=Homo sapiens OX=9606 GN=LASP1 PE=1 SV=2	1	1420.7	0.179	0.068	0.163	-2.48	-3.87	-2.62	0.000440627	2.24759e-05	8.44143e-05	0.00435731	0.000368131	0.00109411	157.5	238.3	137.5	28.1	16.3	22.3	149.5	169.1	122.2	252.3	226.3	171.4	241.8	130.6	121.8	20.5	33.5	26.7	40	15.2	15.4	21.2	15.1	27.1	14867.7	16816.8	12154.8	25089.7
[R].YKSQDPR.[N]	1xBiotin [K2]	2	9	P29401	P29401 [58-64]	P29401 1xBiotin [K59]	Transketolase OS=Homo sapiens OX=9606 GN=TKT PE=1 SV=3	1	1119.53	0.107	0.067	0.091	-3.22	-3.89	-3.46	3.65275e-06	2.46138e-06	1.27361e-05	8.70789e-05	6.44302e-05	0.000246416	156.2	231.7	164.8	16.8	15.6	14.9	346.5	132.8	129.5	196.9	266.3	176.8	101.5	140	192	14.3	8.4	16.4	14.5	13.3	11.7	11.1	15.5	12.7	325418	124698	121588	184929
[R].HTELKEK.[L]	1xBiotin [K5]	1	4	P30533	P30533 [221-227]	P30533 1xBiotin [K225]	Alpha-2-macroglobulin receptor-associated protein OS=Homo sapiens OX=9606 GN=LRPAP1 PE=1 SV=1	1	1110.56	0.082	0.064	0.073	-3.61	-3.96	-3.78	9.89235e-08	3.03576e-08	4.49818e-08	8.58163e-06	4.05273e-06	5.45916e-06	156.8	238.5	164.5	12.8	15.4	12	148.7	159.4	172.9	242.4	204.4	262.6	150.1	172.5	167.2	18.4	13	9.4	12.2	16.4	15.6	7.6	15	12.2	30759	32962.5	35755.4	50135.9
[R].KGLFPFTHVK.[I]	1xBiotin [K1]	1	5	P46109	P46109 [283-292]	P46109 1xBiotin [K283]	Crk-like protein OS=Homo sapiens OX=9606 GN=CRKL PE=1 SV=1	1	1399.76	0.04	0.063	0.094	-4.64	-3.99	-3.42	1.43271e-07	4.40517e-07	2.04868e-06	9.72326e-06	1.78209e-05	6.83748e-05	182.8	209.4	171.3	7.3	13.2	16	148.1	190.1	178.4	204.4	149	251.8	103.5	303.2	167.2	6.2	10	7.1	9.7	13.2	12.8	13.7	15.7	15.8	35491.9	45531.7	42739	48966
[K].LFKPGQEAVKYQGPR.[D]	1xBiotin [K10]	2	11	Q8NBS9	Q8NBS9 [141-155]	Q8NBS9 1xBiotin [K150]	Thioredoxin domain-containing protein 5 OS=Homo sapiens OX=9606 GN=TXNDC5 PE=1 SV=2	1	1944.02	0.078	0.062	0.097	-3.69	-4.01	-3.36	5.48955e-06	6.85006e-06	8.18594e-06	0.000118202	0.000138558	0.000185224	186.2	215.6	155.2	14.5	13.4	15.1	194.5	148.4	190.5	220.6	167.2	221.5	105.8	158.8	249.1	17.5	14.8	11.3	12.5	29.6	13.7	10.2	15.4	18.6	46070.3	35146.3	45125.8	52249.3
[K].EKLIAPVAEEEATVPNNK.[I]	1xBiotin [K2]	1	15	P07195	P07195 [6-23]	P07195 1xBiotin [K7]	L-lactate dehydrogenase B chain OS=Homo sapiens OX=9606 GN=LDHB PE=1 SV=2	1	2178.11	0.049	0.06	0.063	-4.35	-4.05	-3.98	0.000231806	0.00811098	0.00107053	0.00249565	0.0563966	0.0101359	173.1	131	262.9	8.5	7.9	16.6	243.3	169.3	188.6	164.5	142.7	16.8	286.6	173	303.7	11.6	9.3	6.9	12.6	8.2	8.6	19.1	17.2	18.1	51833	36054.3	40177.6	35048.4
[-].MKFNPFVTSDR.[S]	1xBiotin [K2]	2	19	P61254	P61254 [1-11]	P61254 1xBiotin [K2]	60S ribosomal protein L26 OS=Homo sapiens OX=9606 GN=RPL26 PE=1 SV=1	1	1567.74	0.086	0.06	0.042	-3.54	-4.06	-4.57	3.50815e-06	3.81914e-07	1.09625e-07	8.51525e-05	1.6447e-05	8.41815e-06	174.1	158.7	232.9	15	9.5	9.8	104.9	224.1	177.1	158.9	161.4	167.1	253.6	206.8	236.9	21.3	15.3	12.4	15.1	9.7	6	11.1	9.9	8.6	28513.3	60943.5	48146.6	43191.9
[K].YFDKASYR.[V]	1xBiotin [K4]	1	8	P29401	P29401 [141-148]	P29401 1xBiotin [K144]	Transketolase OS=Homo sapiens OX=9606 GN=TKT PE=1 SV=3	1	1275.58	0.069	0.059	0.104	-3.85	-4.08	-3.27	3.46125e-06	3.06112e-06	8.7282e-06	8.51525e-05	7.21526e-05	0.000187938	253.1	166.9	138.3	17.5	9.9	14.4	330.7	204.3	244.1	139.3	181.7	161	130	133.4	156.7	16.9	11	23.2	6.6	9.5	15.5	13.9	16	6.4	80097.9	49465.2	59107	33733.3
[K].SGSLKLR.[I]	1xBiotin [K5]	2	6	O60583	O60583 [502-508]	O60583 1xBiotin [K506]	Cyclin-T2 OS=Homo sapiens OX=9606 GN=CCNT2 PE=1 SV=2	1	986.545	0.058	0.058	0.044	-4.1	-4.12	-4.5	0.000315722	0.000385796	5.96365e-05	0.00326735	0.00365275	0.000804189	117.9	234.5	217.5	6.9	13.5	9.6	73	89.7	128.8	82.4	178.4	332.9	95.1	165.5	576.4	8.2	5.2	5.1	10	14.7	10.3	10.4	6.5	7.3	28083.1	34534	49569.7	31711.6
[K].ANGTTVHVGIHPSKVVITR.[L]	1xBiotin [K14]	2	13	P61254	P61254 [90-108]	P61254 1xBiotin [K103]	60S ribosomal protein L26 OS=Homo sapiens OX=9606 GN=RPL26 PE=1 SV=1	1	2212.2	0.076	0.057	0.04	-3.73	-4.14	-4.66	0.000464903	0.000422859	0.000160683	0.00453026	0.00394767	0.00191528	178.5	194.1	195.2	13.5	11	7.7	203.7	161.1	163.3	177.6	48.8	330.9	267.7	178.5	170.6	16.4	12.3	7.6	10.1	7.3	10.1	7.1	5.9	21.2	49434.1	39097.8	39633.4	43098.1
[K].AKTMLNR.[I]	1xBiotin [K2]	1	5	Q7Z4W1	Q7Z4W1 [197-203]	Q7Z4W1 1xBiotin [K198]	L-xylulose reductase OS=Homo sapiens OX=9606 GN=DCXR PE=1 SV=2	1	1059.54	0.035	0.056	0.057	-4.84	-4.15	-4.13	1.72578e-08	8.43403e-08	3.96967e-08	2.68822e-06	7.93442e-06	5.29951e-06	200.1	186.2	185.6	7	10.5	10.6	129.6	210.5	216.7	144.2	212.8	195.8	195.2	183.2	226.3	4.7	7.4	10.4	11	10.2	11.6	11.5	7.7	11.1	45368.2	73654.2	75840	50470.2
[QK].SAVGFEYQGKTEK.[H]	1xBiotin [K10]	3	9	Q14247	Q14247 [135-147]; [209-221]	Q14247 1xBiotin [K144]; 1xBiotin [K218]	Src substrate cortactin OS=Homo sapiens OX=9606 GN=CTTN PE=1 SV=2	1	1669.79	0.078	0.053	0.098	-3.68	-4.23	-3.35	6.11366e-06	1.06507e-06	4.76335e-05	0.000127527	3.50853e-05	0.000683772	183.9	234.8	140.6	14.4	12.5	13.8	230.5	162.8	186.2	237.8	318.8	160.8	87.1	142.6	142.3	14.5	22.4	10.5	8.5	14.6	12.7	14	23.4	10.4	38582.5	27254	31166	39805.8
[R].HWGGNVLGPKSVAR.[I]	1xBiotin [K10]	1	18	P62424	P62424 [236-249]	P62424 1xBiotin [K245]	60S ribosomal protein L7a OS=Homo sapiens OX=9606 GN=RPL7A PE=1 SV=2	1	1703.88	0.072	0.053	0.051	-3.79	-4.24	-4.28	2.87466e-07	3.11059e-07	6.61035e-08	1.51858e-05	1.38421e-05	5.87031e-06	191.7	168.5	206.4	13.9	8.9	10.6	183.9	173.4	285.5	161.6	112	192.6	181.9	198	210.8	11.5	13.3	16.5	7.8	15.3	8.5	6.3	10.2	10.7	64936.4	61228.6	100817	57069.7
[K].GTPGKGATPAPPGK.[A]	1xBiotin [K5]	8	2	Q13428	Q13428 [309-322]	Q13428 1xBiotin [K313]	Treacle protein OS=Homo sapiens OX=9606 GN=TCOF1 PE=1 SV=3	1	1461.75	0.121	0.052	0.142	-3.05	-4.26	-2.81	0.636472	0.292527	0.857186	1	0.881544	1	171.3	225.5	149.4	20.7	11.8	21.2	21.5	249.8	215.4	18.6	283.6	332.6	16.8	187.9	229.9	25.5	26.5	26	12.7	14.9	23.6	18.7	26.7	69	2581.88	29997.1	25864.8	2236.77
[R].VDKSAVGFDYQGK.[T]	1xBiotin [K3]	3	16	Q14247	Q14247 [169-181]	Q14247 1xBiotin [K171]	Src substrate cortactin OS=Homo sapiens OX=9606 GN=CTTN PE=1 SV=2	1	1639.78	0.042	0.052	0.084	-4.56	-4.28	-3.58	1.17331e-07	1.64672e-07	6.31472e-07	9.21396e-06	1.04684e-05	2.74942e-05	198.8	208.6	160.1	8.4	10.8	13.4	267.5	172.7	185.6	194.7	234.8	194.1	162.1	149.4	147.1	7.9	12.8	7.3	14	10.1	7.1	12.5	14.1	6.3	77824.2	50246.3	53995.1	56658.4
[K].VDKSAVGFEYQGK.[T]	1xBiotin [K3]	3	10	Q14247	Q14247 [206-218]	Q14247 1xBiotin [K208]	Src substrate cortactin OS=Homo sapiens OX=9606 GN=CTTN PE=1 SV=2	1	1653.79	0.113	0.051	0.084	-3.14	-4.28	-3.58	2.59879e-06	2.54872e-07	3.21005e-06	6.93878e-05	1.35239e-05	9.72298e-05	182.7	196.9	174.9	20.7	10.1	14.6	257.5	153.6	167.6	180.6	232.4	169.1	201.2	146.9	160.5	22.2	19	10.7	8.8	10.7	9.3	13.4	25.5	10.9	41907.8	24996	27282	29393.5
[K].GFGGKYGVQK.[D]	1xBiotin [K5]	3	14	Q14247	Q14247 [305-314]	Q14247 1xBiotin [K309]	Src substrate cortactin OS=Homo sapiens OX=9606 GN=CTTN PE=1 SV=2	1	1266.63	0.03	0.05	0.068	-5.04	-4.31	-3.88	1.01092e-05	4.0822e-05	0.000288277	0.000178168	0.000598872	0.00326144	237.6	206.9	129.1	7.2	10.4	8.8	277.1	155	227.1	197.8	215.2	178.8	121.3	123.4	193	6.3	11	6.9	7.9	10	16.5	7.8	36.6	8.4	129663	72518.7	106243	92540
[R].GFGGKFGVQMDR.[V]	1xBiotin [K5]	3	17	Q14247	Q14247 [120-131]	Q14247 1xBiotin [K124]	Src substrate cortactin OS=Homo sapiens OX=9606 GN=CTTN PE=1 SV=2	1	1524.71	0.095	0.05	0.038	-3.39	-4.31	-4.72	0.000267632	3.15643e-05	5.6507e-06	0.0028133	0.000489981	0.000143472	143.3	159.9	265	13.7	8.1	10.1	123.9	136.6	180.6	240.7	105.8	152.5	319.6	252.6	166.5	29.4	12	13	21.9	7.7	7.2	9.6	10.9	9.5	27428.3	30239.2	39991.3	53304
[K].KHLQDLSGR.[I]	1xBiotin [K1]	1	5	P30533	P30533 [340-348]	P30533 1xBiotin [K340]	Alpha-2-macroglobulin receptor-associated protein OS=Homo sapiens OX=9606 GN=LRPAP1 PE=1 SV=1	1	1279.66	0.094	0.047	0.156	-3.41	-4.41	-2.68	2.94337e-06	1.06839e-06	2.08548e-05	7.41396e-05	3.50853e-05	0.000366331	174.7	209.7	163.9	16.4	9.9	25.5	134.3	169.7	240.9	126.9	254.9	203.6	150.1	222.5	159.1	16	16.5	8.8	9.6	9.4	14.4	13.6	24.9	24.8	21599.9	27280.8	38730.2	20413.5
[R].VLVTGAGKGIGR.[G]	1xBiotin [K8]	1	13	Q7Z4W1	Q7Z4W1 [10-21]	Q7Z4W1 1xBiotin [K17]	L-xylulose reductase OS=Homo sapiens OX=9606 GN=DCXR PE=1 SV=2	1	1353.77	0.065	0.043	0.038	-3.95	-4.52	-4.7	3.62078e-07	1.50355e-07	1.13503e-07	1.55927e-05	1.00362e-05	8.41815e-06	199.9	175.8	196.2	12.9	7.6	7.5	174.3	303.7	171.8	131.5	153.3	244.8	221.1	151.5	171.1	12.4	11.3	9.6	4.7	6.7	11.4	6.6	5.9	8.4	57198.2	99646.5	56387	43162
[R].TPKIVSGK.[DV]	1xBiotin [K3]	5	3	P00338	P00338 [74-81]	P00338 1xBiotin [K76]	L-lactate dehydrogenase A chain OS=Homo sapiens OX=9606 GN=LDHA PE=1 SV=2	1	1055.59	0.034	0.04	0.043	-4.89	-4.65	-4.54	0.413896	0.425334	0.327188	1	1	1	208.2	194.9	174.6	7	7.8	7.5	223	283.4	8.5	208.8	310.6	6.7	475	187.1	15.1	7.5	7.5	11.3	8.3	12.4	5.4	8	13.1	8.1	59927	76145.1	2279.26	56104.7
[R].LDPFADGGKTPDPK.[M]	1xBiotin [K9]	1	24	O75533	O75533 [133-146]	O75533 1xBiotin [K141]	Splicing factor 3B subunit 1 OS=Homo sapiens OX=9606 GN=SF3B1 PE=1 SV=3	1	1683.8	0.02	0.039	0.032	-5.61	-4.67	-4.97	2.09688e-07	9.26449e-07	4.08276e-07	1.2171e-05	3.25476e-05	2.09634e-05	206.6	184.2	191.6	4.2	7.2	6.1	288.4	173	186.8	166.5	211.1	163.6	173.3	155.6	225.4	11.3	3.8	3.1	7.9	6.5	6.5	5.5	4	7.5	178362	107004	115535	102990
[K].HQPGGGKVQIVYKPVDLSK.[V]	1xBiotin [K7]	4	16	P10636-5	P10636-5 [268-286]	P10636-5 1xBiotin [K274]	Isoform Tau-C of Microtubule-associated protein tau OS=Homo sapiens OX=9606 GN=MAPT	1	2276.22	0.112	0.039	0.07	-3.16	-4.68	-3.84	0.000384478	5.0644e-05	6.29571e-05	0.00385924	0.000704268	0.000832155	172.2	227.5	161	19.2	8.9	11.2	243	126.1	160.4	349.1	95.4	212	201	150.1	137.3	13.1	22.6	17.9	24.9	7.5	8.3	10.5	8.2	12.7	109309	56721.9	72159.8	157000
[R].GFGGKFGVQMDR.[V]	1xBiotin [K5]; 1xOxidation [M10]	3	8	Q14247	Q14247 [120-131]	Q14247 1xBiotin [K124]	Src substrate cortactin OS=Homo sapiens OX=9606 GN=CTTN PE=1 SV=2	1	1540.7	0.057	0.039	0.069	-4.13	-4.69	-3.87	1.26786e-06	6.0653e-07	3.27741e-06	4.14438e-05	2.25463e-05	9.72298e-05	214.5	218.2	137.2	12.3	8.4	9.4	375.9	157	189.7	256.5	170.4	192.9	113.7	143.3	121.3	9.3	10.9	10.8	5.6	10.5	7.5	12.3	4.1	8.3	139598	58300.9	70469.4	95285.6
[K].ESQKPFEVKGPLPVHTK.[S]	1xBiotin [K]	1	16	P56181-2	P56181-2 [280-296]	P56181-2 1xBiotin [K]	Isoform 2 of NADH dehydrogenase [ubiquinone] flavoprotein 3, mitochondrial OS=Homo sapiens OX=9606 GN=NDUFV3	1	2147.13	0.04	0.036	0.039	-4.64	-4.78	-4.7	1.02851e-07	8.91508e-08	1.48629e-07	8.58163e-06	7.93442e-06	9.0191e-06	149.1	262.8	166.2	6	9.6	6.4	138	144.3	228.3	361.9	254.3	148.7	127.6	164.3	160.8	10.3	5.6	5.8	8.9	10.8	9.2	6.2	6.2	8.7	48524	50749.8	80306.8	127292
[K].SSPLPAKGR.[D]	1xBiotin [K7]	1	2	Q7L2J0	Q7L2J0 [216-224]	Q7L2J0 1xBiotin [K222]	7SK snRNA methylphosphate capping enzyme OS=Homo sapiens OX=9606 GN=MEPCE PE=1 SV=1	1	1138.6	0.028	0.033	0.076	-5.15	-4.93	-3.72	2.1374e-08	7.08365e-08	1.2441e-06	2.85343e-06	7.75131e-06	4.48886e-05	206.3	198.2	170.2	5.8	6.5	12.9	351.9	182	182.3	205.3	173.4	175.1	150.4	146.2	155.1	5	5.2	8.7	5.5	11.2	5.8	11.4	10.1	15.2	115405	59691.7	59785.9	67313.6
[K].ELGYTVKK.[H]	1xBiotin [K]	1	11	P30533	P30533 [333-340]	P30533 1xBiotin [K]	Alpha-2-macroglobulin receptor-associated protein OS=Homo sapiens OX=9606 GN=LRPAP1 PE=1 SV=1	1	1163.61	0.032	0.032	0.023	-4.97	-4.94	-5.47	6.98404e-09	6.46164e-09	6.87394e-09	1.86474e-06	1.53448e-06	2.29418e-06	194.9	180.4	207.9	6.2	5.9	4.7	173.9	199.6	238.1	178	238.3	184.7	103.8	212.9	219.1	5.3	6.4	6.8	6.2	5.4	6	4.8	7.1	3.8	100300	115107	137307	102686
[K].DYSSGFGGKYGVQADR.[V]	1xBiotin [K9]	3	12	Q14247	Q14247 [153-168]	Q14247 1xBiotin [K161]	Src substrate cortactin OS=Homo sapiens OX=9606 GN=CTTN PE=1 SV=2	1	1932.85	0.025	0.028	0.018	-5.3	-5.17	-5.78	2.23906e-07	2.28946e-07	1.45804e-07	1.24548e-05	1.32888e-05	9.0191e-06	172	189.8	224.4	4.4	5.3	4.1	262.1	118.2	170.8	188.5	113.9	294.7	222.8	158.2	224.9	7.3	3.6	4.3	5.8	4.6	5.2	4	7.1	4.1	119903	54067.1	78138.4	86219.6
[K].ASHGYGGKFGVEQDR.[M]	1xBiotin [K8]	3	7	Q14247	Q14247 [80-94]	Q14247 1xBiotin [K87]	Src substrate cortactin OS=Homo sapiens OX=9606 GN=CTTN PE=1 SV=2	1	1833.83	0.048	0.026	0.032	-4.37	-5.28	-4.96	4.53643e-08	5.20386e-09	2.07377e-08	5.20046e-06	1.53448e-06	3.95497e-06	167.7	253.1	159.4	8.1	6.5	5.1	144.4	161	204.2	257.2	222.1	243	213.2	137.5	153	7.6	7.8	9.4	6.3	6.9	5.1	4.9	11.4	4.9	50537.3	56344.6	71460.4	90025.7
[R].TKELGYTVK.[K]	1xBiotin [K2]	1	14	P30533	P30533 [331-339]	P30533 1xBiotin [K332]	Alpha-2-macroglobulin receptor-associated protein OS=Homo sapiens OX=9606 GN=LRPAP1 PE=1 SV=1	1	1264.66	0.014	0.016	0.017	-6.14	-5.97	-5.86	3.08691e-09	4.92936e-09	3.39105e-09	1.03026e-06	1.53448e-06	1.50902e-06	192.7	217.2	180.8	2.7	3.5	3.1	188.7	173.8	185.1	208.6	268.5	207.3	157.3	173.7	211.6	1.4	2.6	3.4	3.3	4.1	3.1	3.2	1.4	3	188812	173938	185237	208779
[K].YGLDGKK.[D]	1xBiotin [K]	1	21	P30533	P30533 [122-128]	P30533 1xBiotin [K]	Alpha-2-macroglobulin receptor-associated protein OS=Homo sapiens OX=9606 GN=LRPAP1 PE=1 SV=1	1	1006.5	0.003	0.008	0.007	-8.23	-6.91	-7.21	2.55624e-09	2.05902e-08	1.43584e-08	1.03026e-06	3.43599e-06	3.19475e-06	183.4	246.6	166.2	0.6	2	1.1	116.8	169.1	227.4	134.3	227.3	390.6	122.9	153.2	248.3	0.6	0.6	0.3	1.6	1.9	1.9	0.9	1	1.4	673557	975553	1.31162e+06	774555
[R].EKHALLEGR.[T]	1xBiotin [K2]	1	24	P30533	P30533 [322-330]	P30533 1xBiotin [K323]	Alpha-2-macroglobulin receptor-associated protein OS=Homo sapiens OX=9606 GN=LRPAP1 PE=1 SV=1	1	1278.66	0.012	0.008	0.012	-6.4	-7.02	-6.33	6.65095e-11	1.76147e-11	6.89167e-11	4.43951e-08	1.17578e-08	4.60019e-08	197.6	226.9	169.3	2.3	1.7	2.1	129.3	215.2	248.8	154.6	252.8	247.2	154.4	184.5	192.8	2.6	2.6	2.3	1.6	1.9	2.3	2.6	2.3	2.2	195833	325999	376873	234114
[K].HFEAKIEK.[H]	1xBiotin [K]	1	36	P30533	P30533 [283-290]	P30533 1xBiotin [K]	Alpha-2-macroglobulin receptor-associated protein OS=Homo sapiens OX=9606 GN=LRPAP1 PE=1 SV=1	1	1227.62	0.008	0.005	0.004	-7.04	-7.52	-7.9	3.42884e-07	1.10212e-07	6.42367e-08	1.55927e-05	8.65486e-06	5.87031e-06	184	200.6	212.1	1.4	1.1	0.9	113	305.6	158.5	166.3	235.7	172.7	148.8	308.1	182.7	1.5	1	1.2	0.9	1.7	0.3	0.4	0.8	0.8	1.17552e+06	3.17745e+06	1.64802e+06	1.7294e+06
[truncated: 41 more columns]

## Sheet: EGFR-DM AGIA-DM
Annotated Sequence	Modifications	# Proteins	# PSMs	Master Protein Accessions	Positions in Master Proteins	Modifications in Master Proteins	Master Protein Descriptions	# Missed Cleavages	Theo. MH+ [Da]	Abundances (Grouped): 1	Abundances (Grouped): 2	Abundances (Grouped): 3	Abundances (Grouped): 4	Abundances (Grouped): 5	Abundances (Grouped): 6	Abundances (Scaled): F7: Sample, 1	Abundances (Scaled): F13: Sample, 1	Abundances (Scaled): F27: Sample, 1	Abundances (Scaled): F8: Sample, 2	Abundances (Scaled): F14: Sample, 2	Abundances (Scaled): F28: Sample, 2	Abundances (Scaled): F9: Sample, 3	Abundances (Scaled): F23: Sample, 3	Abundances (Scaled): F29: Sample, 3	Abundances (Scaled): F10: Sample, 4	Abundances (Scaled): F24: Sample, 4	Abundances (Scaled): F30: Sample, 4	Abundances (Scaled): F11: Sample, 5	Abundances (Scaled): F25: Sample, 5	Abundances (Scaled): F31: Sample, 5	Abundances (Scaled): F12: Sample, 6	Abundances (Scaled): F26: Sample, 6	Abundances (Scaled): F33: Sample, 6	Abundances (Normalized): F7: Sample, 1 H226 AGIA-FabiD DMSO n=1	Abundances (Normalized): F13: Sample, 1 H226 AGIA-FabiD DMSO n=2	Abundances (Normalized): F27: Sample, 1 H226 AGIA-FabiD DMSO n=3	Abundances (Normalized): F8: Sample, 2 H226 AGIA-FabiD DMSO EGF n=1	Abundances (Normalized): F14: Sample, 2 H226 AGIA-FabiD DMSO EGF n=2	Abundances (Normalized): F28: Sample, 2 H226 AGIA-FabiD DMSO EGF n=3	Abundances (Normalized): F9: Sample, 3 H226 AGIA-FabiD Gefitinib EGF n=1	Abundances (Normalized): F23: Sample, 3 H226 AGIA-FabiD Gefitinib EGF n=2	Abundances (Normalized): F29: Sample, 3 H226 AGIA-FabiD Gefitinib EGF n=3	Abundances (Normalized): F10: Sample, 4 H226 EGFR-FabID DMSO n=1	Abundances (Normalized): F24: Sample, 4 H226 EGFR-FabID DMSO n=2	Abundances (Normalized): F30: Sample, 4 H226 EGFR-FabID DMSO n=3	Abundances (Normalized): F11: Sample, 5 H226 EGFR-FabID DMSO EGF n=1	Abundances (Normalized): F25: Sample, 5 H226 EGFR-FabID DMSO EGF n=2	Abundances (Normalized): F31: Sample, 5 H226 EGFR-FabID DMSO EGF n=3	Abundances (Normalized): F12: Sample, 6 H226 EGFR-FabID Gefitinib EGF n=1
[R].ITLSKHQNVQLPR.[E]	1xBiotin [K5]	3	4	P26599	P26599 [406-418]	P26599 1xBiotin [K410]	Polypyrimidine tract-binding protein 1 OS=Homo sapiens OX=9606 GN=PTBP1 PE=1 SV=1	1	1759.96	11.6	63.1	49.1	183.6	169.2	123.3	10.4	6.4	9.9	69	53.9	40.5	12.7	41.9	50.5	153.4	156.7	161.1	119.9	144.5	242.7	80.8	105.2	340.5	2972.96	1827.94	2852.54	19783.9	15460.2	11615.3	3647.27	12027.7	14477.5	44001.6	44957.5	46212.7	34405.8	41442.2	69622.7	23164.5
[K].STQPISSVGKPASVIK.[N]	1xBiotin [K]	3	6	Q7Z6E9	Q7Z6E9 [1335-1350]	Q7Z6E9 1xBiotin [K]	E3 ubiquitin-protein ligase RBBP6 OS=Homo sapiens OX=9606 GN=RBBP6 PE=1 SV=1	0	1824.99	180.3	186.1	173.1	22.2	14.8	23.5	174.7	177	179.9	177.9	182.7	184	146.3	242.2	169.9	22.1	14.1	21.8	9.8	14.5	17.2	23.1	24.7	18	29329.9	29716.2	30207.4	29877.8	30683.2	30896.7	24569.8	40673.1	28524.9	3707.99	2368.1	3657.49	1644.84	2442.93	2893.93	3875.79
[R].TKELGYTVK.[K]	1xBiotin [K2]	1	14	P30533	P30533 [331-339]	P30533 1xBiotin [K332]	Alpha-2-macroglobulin receptor-associated protein OS=Homo sapiens OX=9606 GN=LRPAP1 PE=1 SV=1	1	1264.66	192.7	217.2	180.8	2.7	3.5	3.1	188.7	173.8	185.1	208.6	268.5	207.3	157.3	173.7	211.6	1.4	2.6	3.4	3.3	4.1	3.1	3.2	1.4	3	188812	173938	185237	208779	268742	207456	157403	173811	211771	1435.81	2625.46	3388.63	3336.22	4071.52	3117.18	3197.25
[K].KVDQYKGK.[R]	1xBiotin [K6]	2	3	Q8NBS9	Q8NBS9 [273-280]	Q8NBS9 1xBiotin [K278]	Thioredoxin domain-containing protein 5 OS=Homo sapiens OX=9606 GN=TXNDC5 PE=1 SV=2	2	1191.62	172.5	186.1	155	16.1	35	35.4	145.9	156.1	150.9	148.1	269.5	162.8	113.5	135.6	294.1	14	21.2	14.1	20.2	33.7	30.6	25.2	30.9	33.5	17058.7	18249.2	17638.6	17318.1	31511.4	19030.2	13263.7	15858.1	34380	1633.76	2481.15	1647.5	2366.91	3937.88	3576.59	2949.11
[K].LNQLWEKAQR.[L]	1xBiotin [K7]	1	8	P30533	P30533 [59-68]	P30533 1xBiotin [K65]	Alpha-2-macroglobulin receptor-associated protein OS=Homo sapiens OX=9606 GN=LRPAP1 PE=1 SV=1	1	1511.78	158.2	213.6	172.7	18.9	16.4	20.2	159.6	163.1	171.9	180.6	220.4	221.5	178.1	136.8	194.8	19.5	16.5	26.3	13.7	16.9	21.7	16.6	20.8	21.2	27586.2	28200.3	29713.8	31221	38093.8	38287.4	30793.5	23640.3	33676.4	3372.45	2855.22	4546.01	2371.61	2925.16	3743.14	2863.87
[K].TGGDNKTLLHLGSSAPGK.[E]	1xBiotin [K6]	3	6	Q5SW79	Q5SW79 [712-729]	Q5SW79 1xBiotin [K717]	Centrosomal protein of 170 kDa OS=Homo sapiens OX=9606 GN=CEP170 PE=1 SV=1	1	1979	158.9	214.2	136	35.1	34.8	21	148.4	157.7	150.7	112.8	312.5	203.1	129	108.4	186.3	39.6	33.3	29.3	48	33	27.7	41.1	19.9	19	12199.1	12964.2	12394.4	9279.31	25698.6	16704.2	10608.2	8914.79	15322.1	3258.87	2739.31	2411.6	3945.38	2714.13	2274.26	3376.75
[K].HQPTAIIAKTFK.[G]	1xBiotin [K]	2	44	P29401	P29401 [233-244]	P29401 1xBiotin [K]	Transketolase OS=Homo sapiens OX=9606 GN=TKT PE=1 SV=3	1	1580.86	178.7	185.6	172.6	20.6	17.1	25.4	166.8	182.4	165.7	173.2	171	173.5	151.5	284.7	161	19.2	18.4	20.5	16	21.9	8.4	23.7	18	24.1	183579	200834	182385	190665	188290	191003	166784	313426	177246	21126.9	20220.9	22607.1	17576	24115.9	9291.21	26100
[R].RPDQQLQGEGKIIDR.[R]	1xBiotin [K11]	4	38	Q8NC51	Q8NC51 [112-126]	Q8NC51 1xBiotin [K122]	Plasminogen activator inhibitor 1 RNA-binding protein OS=Homo sapiens OX=9606 GN=SERBP1 PE=1 SV=2	1	1979.01	175.2	200.4	138.7	24.4	29.9	31.4	151.7	161.5	164.9	219.7	175.8	184.7	237.2	127	127.8	22.4	22.4	33.9	46.1	27.5	20.4	18.8	29	29.1	296370	315338	322105	429157	343404	360737	463283	248034	249624	43826.8	43793.9	66181.8	89990.6	53748.8	39765.5	36808.3
[R].FNVLKVTK.[A]	1xBiotin [K5]	1	11	P62280	P62280 [140-147]	P62280 1xBiotin [K144]	40S ribosomal protein S11 OS=Homo sapiens OX=9606 GN=RPS11 PE=1 SV=3	1	1174.67	158.7	160.5	177.1	25.8	38.9	39	161.1	164.2	162	104.6	163.9	213.9	180.8	139	184.3	26.3	11.7	32.1	38.1	39.7	61.8	45.1	39.8	31.6	56729.5	57828.7	57060.7	36827.6	57714.2	75346.3	63689.5	48973.5	64915.9	9272.67	4116.93	11317.5	13414.9	13991.2	21759.7	15880.4
[R].HTELKEK.[L]	1xBiotin [K5]	1	4	P30533	P30533 [221-227]	P30533 1xBiotin [K225]	Alpha-2-macroglobulin receptor-associated protein OS=Homo sapiens OX=9606 GN=LRPAP1 PE=1 SV=1	1	1110.56	156.8	238.5	164.5	12.8	15.4	12	148.7	159.4	172.9	242.4	204.4	262.6	150.1	172.5	167.2	18.4	13	9.4	12.2	16.4	15.6	7.6	15	12.2	30759	32962.5	35755.4	50135.9	42276.4	54313.9	31050.8	35675.8	34587.4	3797.81	2692.46	1937.57	2525.7	3392.05	3232.4	1570.03
[K].NSTFSEIFKK.[E]	1xBiotin [K9]	2	6	P29401	P29401 [344-353]	P29401 1xBiotin [K352]	Transketolase OS=Homo sapiens OX=9606 GN=TKT PE=1 SV=3	1	1426.7	162.7	162.9	191.6	28.8	28.8	25.2	157.3	173.5	166.7	222.7	127.2	166.8	146.7	206.5	196.3	11.8	30.4	29.5	23.3	29.5	32.4	25.9	19.5	34	19012.5	20975	20152	26914.4	15376.3	20166.3	17731.6	24961.5	23722.2	1423.79	3672.49	3562.33	2814.59	3566.43	3919.28	3125.84
[K].DVTFNLKIR.[D]	1xBiotin [K7]	7	4	Q96SU4	Q96SU4 [671-679]	Q96SU4 1xBiotin [K677]	Oxysterol-binding protein-related protein 9 OS=Homo sapiens OX=9606 GN=OSBPL9 PE=1 SV=2	1	1331.71	213.6	148.2	183.4	18.9	14	21.9	235.9	198.6	214	155.2	148.4	136.3	171.7	186.6	183.8	19.5	19	18.8	14	12.1	23.4	11.7	28.9	21.9	30885	25999.1	28015.3	20321.5	19432.9	17840.7	22480.8	24429	24059.8	2557.77	2481.8	2456.9	1838.26	1585.81	3060.53	1536.1
[R].LGVKGVLFQPCER.[T]	1xBiotin [K4]; 1xCarbamidomethyl [C11]	1	13	Q07954	Q07954 [2650-2662]	Q07954 1xBiotin [K2653]	Prolow-density lipoprotein receptor-related protein 1 OS=Homo sapiens OX=9606 GN=LRP1 PE=1 SV=2	1	1728.89	28.6	33.1	31.5	214.9	163.2	128.6	35	27.5	17.5	23.9	31.9	38	19.3	37.1	30.4	206.9	185.6	214.3	155.4	157.1	160.7	121.1	123.8	214.5	3090.07	2433.45	1542.31	2115.96	2815.14	3357.61	1703.06	3275.23	2682.11	18281.5	16399.8	18938.5	13736.6	13882.4	14203.9	10703.2
[K].GTWVQLKR.[Q]	1xBiotin [K7]	1	5	P46778	P46778 [123-130]	P46778 1xBiotin [K129]	60S ribosomal protein L21 OS=Homo sapiens OX=9606 GN=RPL21 PE=1 SV=2	1	1213.65	151.3	169.6	174.8	34.6	32.6	37.2	152.7	157.7	174.4	89	176.8	197.2	193.9	134.9	182.2	27.5	36.1	38.6	21.4	75.9	33.9	28.9	40.1	38.8	20021.3	20672.4	22864.9	11661.1	23175.9	25844.4	25411.3	17685.6	23881	3607.96	4727.43	5063.11	2806.3	9954.01	4449.3	3794.85
[R].KVGLIAAR.[R]	1xBiotin [K1]	1	5	P62917	P62917 [234-241]	P62917 1xBiotin [K234]	60S ribosomal protein L8 OS=Homo sapiens OX=9606 GN=RPL8 PE=1 SV=2	1	1053.62	191.3	121.8	166.8	29.7	37.3	53	191.7	179.9	212.3	117.8	173.7	122.1	99.2	184.6	167.2	29.8	26.4	35.3	28.6	37.4	54.2	29.6	53.2	57.1	48747.8	45741	53987.6	29946.8	44167.3	31040	25237.4	46955.4	42524.3	7571.54	6717.42	8971.76	7272.63	9516.77	13792.9	7520.2
[R].SNDPKSQNHPGWLMR.[G]	1xBiotin [K5]	2	3	P06213	P06213 [567-581]	P06213 1xBiotin [K571]	Insulin receptor OS=Homo sapiens OX=9606 GN=INSR PE=1 SV=4	1	1992.92	38.2	22.5	29.3	220.9	187.3	101.8	22.8	36.7	39.5	26	19.7	21.6	28.2	27.9	35	212.2	195	227.5	280.8	148.5	180	86.8	97.8	114	2135.83	3442.85	3701.8	2440.47	1846.12	2023.05	2642.37	2616.19	3276.58	19890.2	18275.9	21322.1	26320.2	13917.7	16870.9	8133.13
[K].LKLDGLDEDGEK.[E]	1xBiotin [K2]	1	8	P30533	P30533 [96-107]	P30533 1xBiotin [K97]	Alpha-2-macroglobulin receptor-associated protein OS=Homo sapiens OX=9606 GN=LRPAP1 PE=1 SV=1	1	1557.75	176	227.1	137.8	18.8	16.5	23.7	144.9	169.9	165.5	389	213.6	153	155.8	95.9	129.6	16.4	17.7	28.1	14.5	25	15.5	18	22.3	25.3	20424	23938.9	23325.4	54819.7	30099.9	21567.4	21951.2	13515.1	18264.5	2304.93	2494.84	3963.96	2043.01	3523.24	2186.94	2535.32
[K].EAGGGGVGGPGAKSAAQAAAQTNSNAAGK.[Q]	1xBiotin [K13]	4	7	Q8NC51	Q8NC51 [40-68]	Q8NC51 1xBiotin [K52]	Plasminogen activator inhibitor 1 RNA-binding protein OS=Homo sapiens OX=9606 GN=SERBP1 PE=1 SV=2	1	2681.27	156.9	207.1	153.9	28.9	22.4	30.8	167.9	150.5	177.5	221.7	262.4	196.5	22.4	192.7	164.8	30.9	33.2	21.8	29.3	24	24	32.9	12.7	34.4	20152	18061.1	21304.6	26609.7	31492.3	23584	2687.85	23130.1	19771.9	3712.78	3987.89	2621.32	3518.67	2877.45	2880.97	3951.16
[-].MATAEVLNIGKK.[L]	1xBiotin [K]; 1xMet-loss+Acetyl [N-Term]	2	13	P22234	P22234 [1-12]	P22234 1xBiotin [K]; 1xMet-loss+Acetyl [N-Term]	Multifunctional protein ADE2 OS=Homo sapiens OX=9606 GN=PAICS PE=1 SV=3	1	1411.76	185.1	211.7	158.8	10.1	16.6	17.6	166.8	189.4	155	190.7	227.6	145.4	327.3	130.4	143.1	14.4	8.8	9.1	11.4	19.1	15	9.9	20.6	15.9	29396.1	33388	27316.4	33613	40115.9	25632.6	57687.6	22983.2	25216.6	2529.37	1558.12	1610.12	2013.68	3359.9	2637.38	1742.78
[K].GQQIGKVVQVYR.[K]	1xBiotin [K6]	2	25	P61254	P61254 [64-75]	P61254 1xBiotin [K69]	60S ribosomal protein L26 OS=Homo sapiens OX=9606 GN=RPL26 PE=1 SV=1	1	1600.86	182.4	150.7	181.2	30.1	24.2	31.3	160.5	193	170.2	140.7	162.1	129.3	123	169.1	299.1	25	28.1	30.5	18.2	35.4	22.6	22.8	41.3	29.3	41408.1	49786.6	43926.1	36292.8	41829.5	33369.2	31724.1	43631.2	77162.4	6451.5	7246.92	7879.73	4690.2	9122.06	5837.22	5877.13
[K].YKEETIEK.[M]	1xBiotin [K2]	1	8	P61254	P61254 [135-142]	P61254 1xBiotin [K136]	60S ribosomal protein L26 OS=Homo sapiens OX=9606 GN=RPL26 PE=1 SV=1	1	1265.61	150	191.5	207.8	16.3	14.9	19.4	143	168	137.9	182.5	206.2	161.7	135.9	256.1	198.1	10.9	15.5	15.9	14.2	22.3	7.1	90	16.2	18.5	31741.3	37297	30627.1	40518.9	45780.7	35903.5	30166.5	56854.3	43976.7	2424.86	3448.57	3538.76	3161.1	4956.85	1584.17	19973.2
[K].EVVNKLIPDSIGK.[D]	1xBiotin [K5]	1	3	P61247	P61247 [183-195]	P61247 1xBiotin [K187]	40S ribosomal protein S3a OS=Homo sapiens OX=9606 GN=RPS3A PE=1 SV=2	1	1637.89	132.4	122.5	169.4	65.4	59.9	50.4	136.1	122.7	129.7	151.4	119.9	67.7	165.9	115.9	246.4	64.6	54.5	64	82.5	58.7	35.3	49.3	46.9	88.4	6583.54	5934.2	6270.73	7323.63	5801.41	3273.3	8022.27	5606.22	11917	3124.86	2636.96	3096.25	3992.22	2837.63	1708.82	2385.82
[K].AFGQAKHQPTAIIAK.[T]	1xBiotin [K6]	2	22	P29401	P29401 [227-241]	P29401 1xBiotin [K232]	Transketolase OS=Homo sapiens OX=9606 GN=TKT PE=1 SV=3	1	1806.97	180.1	211.8	155.8	15.4	23.2	13.7	136.7	173.4	163	133.4	191.6	306.4	122.4	141	304.2	8.8	14.3	13.9	22.7	11.5	21	10	13.3	12.4	162416	206101	193679	158579	227708	364088	145505	167539	361472	10475.8	17046.2	16520.3	26967.7	13655	24907.5	11871.6
[R].KGLFPFTHVK.[I]	1xBiotin [K1]	1	5	P46109	P46109 [283-292]	P46109 1xBiotin [K283]	Crk-like protein OS=Homo sapiens OX=9606 GN=CRKL PE=1 SV=1	1	1399.76	182.8	209.4	171.3	7.3	13.2	16	148.1	190.1	178.4	204.4	149	251.8	103.5	303.2	167.2	6.2	10	7.1	9.7	13.2	12.8	13.7	15.7	15.8	35491.9	45531.7	42739	48966	35690.6	60316.7	24801.2	72642.9	40068.7	1494.98	2399.16	1711.9	2317.27	3172.31	3075.8	3276.21
[K].SAVGHEYQSKLSK.[H]	1xBiotin [K]	3	5	Q14247	Q14247 [98-110]	Q14247 1xBiotin [K]	Src substrate cortactin OS=Homo sapiens OX=9606 GN=CTTN PE=1 SV=2	1	1659.82	148.5	178.7	141.1	45.4	34.6	51.5	141	150.4	127.4	169.6	146.2	292.1	133.9	116.3	153.4	47.8	36.7	43.1	35.5	29.5	32.9	34.3	61	48.9	9231.98	9847.43	8341.58	11110.7	9577.32	19131.8	8772.3	7615.37	10048.7	3129.6	2402.73	2823.97	2325.52	1930.64	2153.05	2248.67
[R].AKEAQDDLVK.[T]	1xBiotin [K2]	1	3	P15311	P15311 [449-458]	P15311 1xBiotin [K450]	Ezrin OS=Homo sapiens OX=9606 GN=EZR PE=1 SV=4	1	1342.67	72.6	34.9	53.6	140.2	168.2	130.5	68.7	71.3	61.4	30.6	66.3	33	38.2	50.9	50.7	122.1	134.2	132.6	121.8	306.9	159.1	87.8	123.5	141	4007.63	4157.95	3584.72	1784.11	3868.17	1927.53	2228.54	2967.31	2956.79	7123.38	7832.66	7737.09	7105.87	17910.2	9283.74	5121.86
[R].YYKNIGLGFK.[T]	1xBiotin [K3]	1	29	P62280	P62280 [36-45]	P62280 1xBiotin [K38]	40S ribosomal protein S11 OS=Homo sapiens OX=9606 GN=RPS11 PE=1 SV=3	1	1428.73	170.7	167.3	171.9	26	26.6	37.6	172	139.5	165.9	162.6	85.9	197.7	167.1	159.7	271.3	31.9	25.2	22.5	25.8	24.3	39.1	23.5	49.4	36.5	96704	78452.3	93275.9	91429.4	48305.8	111127	93954.5	89773.8	152527	17909.3	14190.1	12630.3	14529.5	13679.2	22001.3	13197.7
[R].QQEGFKGTFPDAR.[E]	1xBiotin [K6]	2	80	Q15233	Q15233 [366-378]	Q15233 1xBiotin [K371]	Non-POU domain-containing octamer-binding protein OS=Homo sapiens OX=9606 GN=NONO PE=1 SV=4	1	1706.8	176.3	170.2	198.2	16.6	22.5	16.2	183.1	176.2	145.1	170	272.3	136.7	146.2	198	215.8	16.6	14.1	20.4	25.4	22.5	14.4	9.8	16.2	17.1	336636	323932	266733	312580	500464	251336	268702	364010	396729	30503.5	25895	37550.9	46644	41323.5	26499.5	18047.8
[K].ANTFGKAGIK.[T]	1xBiotin [K6]	1	4	Q7Z417	Q7Z417 [141-150]	Q7Z417 1xBiotin [K146]	Nuclear fragile X mental retardation-interacting protein 2 OS=Homo sapiens OX=9606 GN=NUFIP2 PE=1 SV=1	1	1232.65	181.3	221.2	128.2	17.3	31	21.1	169.1	185.7	213.7	141.5	240.4	226.6	104.2	169.1	131.3	27.6	12.6	17.7	33.9	31.8	31.8	21.6	26.3	15.1	19738	21677.1	24946.2	16516	28058.2	26447.4	12166.3	19735.6	15331.3	3226.03	1467.94	2063.22	3960.74	3711.43	3707.69	2518.76
[K].EFEGKTLVSVTK.[E]	1xBiotin [K5]	3	14	P07900	P07900 [535-546]	P07900 1xBiotin [K539]	Heat shock protein HSP 90-alpha OS=Homo sapiens OX=9606 GN=HSP90AA1 PE=1 SV=5	1	1563.81	168.7	117.6	159.8	43.1	49.6	61.2	176.1	162.3	170.1	124.6	118.6	105	187.1	161.2	155.9	17.8	43.4	50.8	53.4	50.1	34.5	49.1	78.2	61.7	23874.6	22006.4	23069.5	16902.3	16090.1	14240.8	25376.3	21858.9	21143	2407.52	5890.17	6894	7245.63	6789.14	4674.54	6660.37
[K].VETFSGVYKK.[L]	1xBiotin [K]	1	6	P62081	P62081 [170-179]	P62081 1xBiotin [K]	40S ribosomal protein S7 OS=Homo sapiens OX=9606 GN=RPS7 PE=1 SV=1	1	1383.7	45.1	89.5	68.6	121.9	146.6	128.2	58.8	40	43.9	87.2	87.8	66.4	39.9	66.8	91.6	122.6	118.8	116	111.2	142.9	271.9	55	154.3	124.9	2448.3	1664.43	1829.06	3631.54	3656.52	2764.5	1663.2	2783.37	3814.65	5104.32	4946.47	4828.04	4628.95	5948.98	11321.3	2289.35
[K].ANVGAGKK.[KM-]	1xBiotin [K]	3	26	P62847-4	P62847-4 [123-130]	P62847-4 1xBiotin [K]	Isoform 4 of 40S ribosomal protein S24 OS=Homo sapiens OX=9606 GN=RPS24	1	970.514	164.4	142.9	136.6	47.4	42.2	66.6	151.3	170.2	154.6	121.8	179.5	134.4	122.5	196.2	128.5	44.6	44.3	65.5	33.8	45.2	39.7	39.3	62.7	66	358458	403428	366407	288594	425268	318454	290284	465072	304501	105596	105072	155180	80043.3	107026	94008.1	93222
[K].ANGTTVHVGIHPSKVVITR.[L]	1xBiotin [K14]	2	13	P61254	P61254 [90-108]	P61254 1xBiotin [K103]	60S ribosomal protein L26 OS=Homo sapiens OX=9606 GN=RPL26 PE=1 SV=1	1	2212.2	178.5	194.1	195.2	13.5	11	7.7	203.7	161.1	163.3	177.6	48.8	330.9	267.7	178.5	170.6	16.4	12.3	7.6	10.1	7.3	10.1	7.1	5.9	21.2	49434.1	39097.8	39633.4	43098.1	11839	80321.6	64967.9	43335.7	41405.2	3968.69	2992.69	1836.39	2458.12	1781.36	2448.93	1712.34
[K].KLSSWDQAETPGHTPSLR.[W]	1xBiotin [K1]	1	14	O75533	O75533 [214-231]	O75533 1xBiotin [K214]	Splicing factor 3B subunit 1 OS=Homo sapiens OX=9606 GN=SF3B1 PE=1 SV=3	1	2236.08	173.1	157.2	229.6	11.1	15.7	13.4	159.7	172.5	207.5	237.1	125.6	156.7	251.7	135.7	228.8	15.7	9.9	11.1	24.3	9	15.6	13.3	6.9	18.9	42274.4	45672.6	54933.9	62766.7	33258.2	41473.4	66643	35915	60572.6	4159.86	2633.74	2935.86	6440.85	2384.7	4135.36	3530.26
[R].SGEPQTFTLKFK.[R]	1xBiotin [K10]	5	5	P05556	P05556 [125-136]	P05556 1xBiotin [K134]	Integrin beta-1 OS=Homo sapiens OX=9606 GN=ITGB1 PE=1 SV=2	1	1608.81	62.8	61.4	105.6	136.7	120.3	113.1	71.3	58.6	57.9	111.6	51.1	57.3	109.6	98.4	97.9	129.7	119.1	127.5	44.5	155.6	112.2	98.7	105.4	193.7	2385.68	1960.86	1937.82	3736.24	1710.89	1917.57	3670.55	3296.2	3278.95	4340.9	3988.36	4268	1489.67	5209.5	3755.19	3303.95
[K].GKSHKPVGCLGEAGHVLSK.[V]	1xBiotin [K]; 1xCarbamidomethyl [C9]	1	10	P23352	P23352 [528-546]	P23352 1xBiotin [K]	Anosmin-1 OS=Homo sapiens OX=9606 GN=ANOS1 PE=1 SV=3	1	2187.12	55.5	66.7	43.1	180.7	153.9	100.1	28.6	66.2	58	60.2	70.1	69.8	11.4	76.9	45	177.9	189	189.6	86.3	166.6	161	88.6	104.7	150.1	7402.57	17111.7	15008.2	15562.6	18119.7	18043.9	2950.29	19896	11646.5	46022	48891.7	49034	22314.1	43077.8	41630.2	22908.8
[K].LFKPGQEAVKYQGPR.[D]	1xBiotin [K10]	2	11	Q8NBS9	Q8NBS9 [141-155]	Q8NBS9 1xBiotin [K150]	Thioredoxin domain-containing protein 5 OS=Homo sapiens OX=9606 GN=TXNDC5 PE=1 SV=2	1	1944.02	186.2	215.6	155.2	14.5	13.4	15.1	194.5	148.4	190.5	220.6	167.2	221.5	105.8	158.8	249.1	17.5	14.8	11.3	12.5	29.6	13.7	10.2	15.4	18.6	46070.3	35146.3	45125.8	52249.3	39611.5	52469.9	25051.7	37602.4	59008.8	4138.51	3502.81	2673.52	2966.39	7006.51	3237.21	2423.44
[R].AQGGQTQSPTKSHTPSPTSPK.[S]	1xBiotin [K]	2	11	P40123	P40123 [294-314]	P40123 1xBiotin [K]	Adenylyl cyclase-associated protein 2 OS=Homo sapiens OX=9606 GN=CAP2 PE=1 SV=1	1	2348.13	165.2	193.9	188.7	12.4	17.2	22.7	159.2	136.4	180.9	224.3	186.9	155.8	231.3	181.3	181.9	10.8	11.9	20.4	13.3	16.6	21.9	21.9	29.3	16.2	28882.3	24740.7	32802.6	40679.3	33896.4	28254.5	41947.9	32884.8	32991.9	1952.68	2161.98	3693.28	2411.28	3010.05	3965.77	3964.82
[-].MQSNKTFNLEK.[Q]	1xAcetyl [N-Term]; 1xBiotin [K5]	1	12	Q15233	Q15233 [1-11]	Q15233 1xAcetyl [N-Term]; 1xBiotin [K5]	Non-POU domain-containing octamer-binding protein OS=Homo sapiens OX=9606 GN=NONO PE=1 SV=4	1	1607.76	137.4	134.3	286	12	16.8	13.5	117.9	146.6	153.6	120.7	143.3	174.2	334.4	305.1	156.5	21.2	11.6	12.8	18	15.8	20.4	14.5	24.5	8.9	19818	24654.7	25831.9	20293.3	24095.3	29290.5	56223.2	51307.9	26310.3	3562.5	1950.44	2145.59	3021.42	2665.05	3430.37	2430.74
[K].ENQKHIYYITGETK.[D]	1xBiotin [K4]	2	2	P07900	P07900 [486-499]	P07900 1xBiotin [K489]	Heat shock protein HSP 90-alpha OS=Homo sapiens OX=9606 GN=HSP90AA1 PE=1 SV=5	1	1949.94	142.9	109.3	179.6	30.4	82.8	55.1	126.5	147.9	148.3	113.1	161	92.1	74	203.7	185.8	28.6	31.4	48.9	31.5	160.5	85.7	57	38.3	65.7	12982.6	15171.5	15212	11605.6	16514.1	9451.61	7592.6	20894.2	19064.9	2933.18	3222.82	5013.69	3235.02	16471.2	8792.24	5845.52
[R].WFQQKYDGIILPGK.[-]	1xBiotin [K5]	2	2	P62913	P62913 [165-178]	P62913 1xBiotin [K169]	60S ribosomal protein L11 OS=Homo sapiens OX=9606 GN=RPL11 PE=1 SV=2	1	1918.99	93.7	112.3	58.2	126.8	101.2	107.8	57.8	59.2	63.6	173.6	42.6	70.9	619	34	36.7	79.6	81.6	80	59.8	63.8	74.6	61.6	68	73.3	2952.14	3018.86	3247.56	8861.71	2175.22	3616.58	31592.6	1735.95	1873.82	4064.1	4166.76	4083.15	3052.36	3258.51	3805.92	3145.94
[K].LIKGVIVDK.[D]	1xBiotin [K3]	2	6	P48643	P48643 [224-232]	P48643 1xBiotin [K226]	T-complex protein 1 subunit epsilon OS=Homo sapiens OX=9606 GN=CCT5 PE=1 SV=1	1	1210.72	182.5	133.2	200.8	22.5	30.1	31	192.4	147.4	187.2	183.2	125.4	136.6	220.3	146.9	206	24.8	23.1	14.5	28.7	33.7	30.9	19.1	48	31.8	33778.4	25865	32868.2	32164.9	22014.8	23982.3	38663	25788.9	36155.3	4355.21	4047.97	2549.03	5042.46	5922.44	5420.45	3345.51
[K].ELGYTVKK.[H]	1xBiotin [K]	1	11	P30533	P30533 [333-340]	P30533 1xBiotin [K]	Alpha-2-macroglobulin receptor-associated protein OS=Homo sapiens OX=9606 GN=LRPAP1 PE=1 SV=1	1	1163.61	194.9	180.4	207.9	6.2	5.9	4.7	173.9	199.6	238.1	178	238.3	184.7	103.8	212.9	219.1	5.3	6.4	6.8	6.2	5.4	6	4.8	7.1	3.8	100300	115107	137307	102686	137440	106534	59869.7	122778	126365	3029.21	3683.28	3911.1	3581.68	3091.65	3460.1	2778.15
[K].SLVSKGTLVQTK.[G]	1xBiotin [K5]	5	4	P16401; P10412	P16401 [89-100]; P10412 [86-97]	P16401 1xBiotin [K93]; P10412 1xBiotin [K90]	Histone H1.5 OS=Homo sapiens OX=9606 GN=H1-5 PE=1 SV=3 Histone H1.4 OS=Homo sapiens OX=9606 GN=H1-4 PE=1 SV=2	1	1486.83	37.1	45.1	51	176.2	131	159.6	54.1	36.6	23.2	55.3	25.1	44.5	29.7	50.4	52.3	173.8	200.1	167.1	213.9	116.5	129.2	108.8	162	157.5	3761.77	2547.63	1616.2	3849.02	1745.17	3096.92	2063.63	3503.03	3634.99	12091.5	13920.2	11621	14877	8103.35	8988.43	7566.98
[K].VIQGCGNPKVNPQGPGPEEK.[R]	1xBiotin [K]; 1xCarbamidomethyl [C5]	1	4	P35052	P35052 [339-358]	P35052 1xBiotin [K]	Glypican-1 OS=Homo sapiens OX=9606 GN=GPC1 PE=1 SV=2	1	2331.12	10.8	14.3	9	280	128.1	157.8	10.8	8.3	18.1	19.5	14.3	7	8.7	9	14.1	241.1	332.1	279.5	127.9	154.9	114	110.3	173	157.6	2211.1	1710.85	3705.43	4000.01	2933.86	1428.47	1792.36	1845.17	2886.46	49501.6	68175.4	57373.4	26249.5	31807	23392.2	22635.7
[K].KSADTLWDIQK.[D]	1xBiotin [K1]	1	11	P07195	P07195 [319-329]	P07195 1xBiotin [K319]	L-lactate dehydrogenase B chain OS=Homo sapiens OX=9606 GN=LDHB PE=1 SV=2	1	1530.76	189.2	164.3	174.7	25.2	22.4	24.1	144.4	152.2	188.8	468.3	101.7	132.2	165.7	139.9	140.5	20.3	14.4	25.6	20.9	18.1	13.1	12.9	21.6	19.4	24455.1	25777.8	31966.2	79312.2	17224.4	22386.2	28052.9	23689.4	23800.7	3429.6	2446.41	4343.52	3544.47	3057.31	2213.8	2177.49
[K].QCSKEDGGGWWYNR.[C]	1xBiotin [K4]; 1xCarbamidomethyl [C2]	1	10	P02675	P02675 [423-436]	P02675 1xBiotin [K426]	Fibrinogen beta chain OS=Homo sapiens OX=9606 GN=FGB PE=1 SV=2	1	1968.81	51.3	70.7	81.9	143.8	168.3	84	46.5	55.7	48.4	91.5	59.5	66.7	181.5	77.2	62.6	114.1	135.6	136.3	158.8	111.8	172.8	160	41.7	79.2	2708.25	3242.35	2816.23	5331.18	3463.95	3885.11	10569.6	4498.52	3647.01	6645.37	7896.26	7939.67	9246.67	6512.28	10062	9315.52
[R].LLEQKTQESQK.[K]	1xBiotin [K5]	3	5	O43670	O43670 [96-106]	O43670 1xBiotin [K100]	BUB3-interacting and GLEBS motif-containing protein ZNF207 OS=Homo sapiens OX=9606 GN=ZNF207 PE=1 SV=1	1	1557.79	167.6	176.1	109.8	47.2	51.3	47.9	171.1	142.1	172.1	131.6	179.7	275.8	28.7	187.4	112	29.7	48.2	51.1	52.4	54.1	33.9	48.9	27.6	53.5	11918.6	9902.93	11991.4	9167.82	12521.3	19215.2	2000.14	13052	7805.2	2068.22	3359.5	3557.35	3647.96	3766.81	2360.45	3408.83
[K].QLEIAHEKLR.[H]	1xBiotin [K8]	1	7	P30533	P30533 [297-306]	P30533 1xBiotin [K304]	Alpha-2-macroglobulin receptor-associated protein OS=Homo sapiens OX=9606 GN=LRPAP1 PE=1 SV=1	1	1462.78	153.2	216.3	167.6	21.1	18.3	23.6	172.8	151.9	128.4	237	214.5	189.1	166.2	142.5	202.1	27.2	20.9	19.7	18.2	16.8	19.8	17.9	23.4	31.7	20938.4	18408.6	15567.1	28720.8	26000.3	22919	20140.4	17266.7	24499.1	3299.14	2532.78	2390.5	2201.32	2035.4	2401.52	2166.11
[K].KELASALK.[S]	1xBiotin [K1]	3	1	P07355	P07355 [81-88]	P07355 1xBiotin [K81]	Annexin A2 OS=Homo sapiens OX=9606 GN=ANXA2 PE=1 SV=2	1	1085.6	13.9	24.8	84.9	140	166.8	169.5	12.2	13.4	24.3	23.9	29.9	15.1	17.5	116	81.7	134.6	121.7	162.8	202.1	160.4	159.2	119	163	243.3	1447.43	1584.9	2875.88	2824.07	3532.14	1785.64	2075.57	13722.5	9663.48	15928.2	14400.8	19259.2	23915.1	18976.3	18842.2	14075
[R].KPESNAVTKTAGPIASAQK.[Q]	1xBiotin [K9]	4	13	P27816	P27816 [968-986]	P27816 1xBiotin [K976]	Microtubule-associated protein 4 OS=Homo sapiens OX=9606 GN=MAP4 PE=1 SV=3	1	2124.11	205.4	188.1	154.4	16.9	20.6	14.5	160.9	226.6	202.2	184.8	236.1	185.2	140.5	167.6	152	21.2	15	16.7	20.7	20.3	8.9	11.1	16.1	14.3	27572.3	38817.6	34634.4	31652.2	40446.9	31723.4	24062.9	28716.9	26035	3631.35	2578.07	2854.81	3545.92	3475.2	1518.71	1898.75
[R].LLVKNQDVSISNVQPK.[T]	1xBiotin [K4]	1	6	Q96EV2	Q96EV2 [874-889]	Q96EV2 1xBiotin [K877]	RNA-binding protein 33 OS=Homo sapiens OX=9606 GN=RBM33 PE=1 SV=3	1	2008.09	190.9	145.7	194.3	22.5	24.2	22.4	159.1	220.7	184.6	140.3	149.7	140.9	182.1	220.8	187.8	23.5	21.3	21.7	32.3	23.4	19.6	21.7	21.6	29.1	16627.5	23071.6	19292.2	14668	15643.1	14725.2	19029.2	23081.2	19631.6	2452.95	2227.59	2268.8	3379.31	2448.44	2043.92	2264.01
[K].EKGTWVQLK.[R]	1xBiotin [K2]	1	7	P46778	P46778 [121-129]	P46778 1xBiotin [K122]	60S ribosomal protein L21 OS=Homo sapiens OX=9606 GN=RPL21 PE=1 SV=2	1	1314.69	230.4	189.1	135.3	13.8	19.3	12	262.3	184	238.1	197.7	175.8	195.5	139.8	180.2	90	12.9	14.8	14.3	20	21.2	14.8	12.4	16.3	10.1	47922.8	33619.7	43510.7	36122.4	32115.6	35716.4	25552.1	32926.9	16437.9	2348.62	2705.26	2606.6	3652.6	3864.7	2706.73	2272.81
[R].GCVGEVSVNGKR.[L]	1xBiotin [K11]; 1xCarbamidomethyl [C2]	1	13	P98160	P98160 [4075-4086]	P98160 1xBiotin [K4085]	Basement membrane-specific heparan sulfate proteoglycan core protein OS=Homo sapiens OX=9606 GN=HSPG2 PE=1 SV=4	1	1487.71	16.9	132.4	113.8	100.8	122.6	113.5	23.5	17.6	16.6	41.8	141.3	138.1	118.6	71.3	172.1	105.1	101.9	133.3	92	136.5	127.9	103.4	140.8	118.4	2012	1510.07	1426.35	3582.42	12115.8	11839.6	10173.3	6114.12	14756.8	9008.01	8740.42	11426.4	7887.78	11705.8	10962.9	8862.46
[K].ASHGYGGKFGVEQDR.[M]	1xBiotin [K8]	3	7	Q14247	Q14247 [80-94]	Q14247 1xBiotin [K87]	Src substrate cortactin OS=Homo sapiens OX=9606 GN=CTTN PE=1 SV=2	1	1833.83	167.7	253.1	159.4	8.1	6.5	5.1	144.4	161	204.2	257.2	222.1	243	213.2	137.5	153	7.6	7.8	9.4	6.3	6.9	5.1	4.9	11.4	4.9	50537.3	56344.6	71460.4	90025.7	77750.5	85059.3	74608.8	48137.1	53566.7	2671.49	2727.7	3294.83	2194.99	2430.03	1798.21	1723.65
[K].HQPHKVTQYK.[K]	1xBiotin [K5]	2	10	P83881	P83881 [18-27]	P83881 1xBiotin [K22]	60S ribosomal protein L36a OS=Homo sapiens OX=9606 GN=RPL36A PE=1 SV=2	1	1491.75	158.8	193.9	134.1	15.3	49.9	48	152	122.9	174.5	86.3	185.7	303.3	114.5	195.5	128.4	8.5	15.9	14.6	23.7	83	47.8	27.7	69.7	46	26642.4	21529.8	30584.3	15126.4	32538.5	53153.8	20056.8	34253	22506.9	1483.46	2783.8	2565.76	4154.42	14541.7	8372.04	4852.11
[R].AQLLLKATPEDNGR.[S]	1xBiotin [K6]	1	17	P05362	P05362 [354-367]	P05362 1xBiotin [K359]	Intercellular adhesion molecule 1 OS=Homo sapiens OX=9606 GN=ICAM1 PE=1 SV=2	1	1751.91	16.7	92.5	89.4	118.8	171.6	110.9	31.9	15.8	16.8	87.1	114	92.7	69.3	101.6	89.6	102.8	135.8	119	135.6	172	173.3	111.1	128.5	103.1	3487.18	1729.53	1834.08	9533.45	12473.6	10144.6	7578.14	11114.7	9804.42	11243.2	14855.3	13020.5	14837.2	18813.6	18961.3	12154.4
[K].KGLDPYNVLAPK.[G]	1xBiotin [K1]	1	14	P10606	P10606 [57-68]	P10606 1xBiotin [K57]	Cytochrome c oxidase subunit 5B, mitochondrial OS=Homo sapiens OX=9606 GN=COX5B PE=1 SV=2	1	1540.82	169.5	181.9	176.1	25.1	25.5	21.8	144.8	154.1	195.6	180.2	160.7	165.4	307.4	123.6	160.2	19.5	22.9	28.4	31.3	16.1	23.2	19.8	16.3	30.4	16611.8	17682.7	22438.3	20669.2	18438.8	18978.8	35267.1	14177.5	18375	2232.63	2621.45	3254.95	3593.6	1845.29	2665.42	2276.35
[K].ILQLKESR.[Q]	1xBiotin [K5]	1	8	Q13435	Q13435 [276-283]	Q13435 1xBiotin [K280]	Splicing factor 3B subunit 2 OS=Homo sapiens OX=9606 GN=SF3B2 PE=1 SV=2	1	1212.68	206.6	183.1	164.4	11.8	17.6	16.4	242.4	198.6	169	150.7	218	176	152.2	158.1	198.8	16.3	11.4	10.5	16.9	26	13.7	15.8	16.8	8.9	45329.7	37135.8	31600.9	28172.9	40754.4	32915.1	28450.2	29553.1	37172.7	3042.14	2129.35	1968.01	3154.86	4863.56	2566.7	2948.08
[K].IVPKISYASK.[V]	1xBiotin [K4]	1	2	Q7Z417	Q7Z417 [352-361]	Q7Z417 1xBiotin [K355]	Nuclear fragile X mental retardation-interacting protein 2 OS=Homo sapiens OX=9606 GN=NUFIP2 PE=1 SV=1	1	1331.74	155.3	224.6	168.4	14.9	18.9	18	112.9	151	155	229.6	218.4	177.9	156	163.7	277.6	14.5	10.9	23.7	24.7	15.6	18.4	11	17.5	21.5	15546.3	20793.6	21336	31612.5	30064.9	24493.2	21475	22540.9	38212.9	1990.51	1504.96	3256.45	3400.64	2151.03	2534.05	1515.35
[QK].SAVGFEYQGKTEK.[H]	1xBiotin [K10]	3	9	Q14247	Q14247 [135-147]; [209-221]	Q14247 1xBiotin [K144]; 1xBiotin [K218]	Src substrate cortactin OS=Homo sapiens OX=9606 GN=CTTN PE=1 SV=2	1	1669.79	183.9	234.8	140.6	14.4	12.5	13.8	230.5	162.8	186.2	237.8	318.8	160.8	87.1	142.6	142.3	14.5	22.4	10.5	8.5	14.6	12.7	14	23.4	10.4	38582.5	27254	31166	39805.8	53365.3	26922.1	14583.7	23876.9	23826.2	2435.27	3752.53	1754.92	1418.69	2436.29	2126.94	2342.57
[K].NIGLGFKTPK.[E]	1xBiotin [K7]	1	8	P62280	P62280 [39-48]	P62280 1xBiotin [K45]	40S ribosomal protein S11 OS=Homo sapiens OX=9606 GN=RPS11 PE=1 SV=3	1	1300.71	152.8	137.6	141.2	49.5	62.8	56.2	151.4	176.7	143	119.1	136.3	139.6	140	138.9	163.2	63.2	49	40.5	48.2	62.2	69	45.4	58.7	55.7	18029.2	21038.5	17032.8	14179.5	16236.2	16624.6	16669	16543.9	19435.7	7529.65	5836.5	4827.13	5737.18	7408.94	8215.62	5409.31
[K].YLEKYYNLK.[N]	1xBiotin [K4]	1	21	P03956	P03956 [37-45]	P03956 1xBiotin [K40]	Interstitial collagenase OS=Homo sapiens OX=9606 GN=MMP1 PE=1 SV=3	1	1459.73	8.6	9.2	21	201.7	179	180.5	5.3	8.9	15.7	14.2	9.5	6.2	24.5	15.7	21.7	208.3	155.5	225.5	184.9	212.1	147.3	206.6	151.6	186.5	2367.6	3981.44	7047.04	6397.04	4291.39	2786.57	10997.8	7064.33	9753.22	93629.8	69906.3	101328	83089.4	95315.1	66202.7	92862.6
[R].LKQQSELQSQVR.[Y]	1xBiotin [K2]	2	9	Q14847	Q14847 [74-85]	Q14847 1xBiotin [K75]	LIM and SH3 domain protein 1 OS=Homo sapiens OX=9606 GN=LASP1 PE=1 SV=2	1	1669.87	164.2	214.5	146.9	22.5	34.9	16.9	141.1	164.8	198.6	162.5	277.3	215.3	125.2	147.4	166.6	22.6	23.2	20.8	36	35.1	12.9	14.7	18.8	17	15681.8	18316.3	22064.2	18059.6	30811.5	23922.5	13912.6	16383.1	18511	2507.87	2576.36	2315	3995.25	3897.27	1437.46	1637.02
[K].VAQPKEVYR.[Q]	1xBiotin [K5]	3	3	O14979	O14979 [307-315]	O14979 1xBiotin [K311]	Heterogeneous nuclear ribonucleoprotein D-like OS=Homo sapiens OX=9606 GN=HNRNPDL PE=1 SV=3	1	1315.68	156.6	161.2	130.3	39.8	42.8	69.3	172.8	147.2	152.9	131.3	180.4	157.3	127.1	111.6	143.9	29.8	38.8	64.9	41.8	69.4	40.5	54.3	68.4	67.7	15384.2	13098.6	13607.2	11685.6	16060.5	14002.6	11315.1	9935.96	12812.3	2650	3454.43	5775.36	3720.28	6174.01	3604.06	4829.01
[K].EKLIAPVAEEEATVPNNK.[I]	1xBiotin [K2]	1	15	P07195	P07195 [6-23]	P07195 1xBiotin [K7]	L-lactate dehydrogenase B chain OS=Homo sapiens OX=9606 GN=LDHB PE=1 SV=2	1	2178.11	173.1	131	262.9	8.5	7.9	16.6	243.3	169.3	188.6	164.5	142.7	16.8	286.6	173	303.7	11.6	9.3	6.9	12.6	8.2	8.6	19.1	17.2	18.1	51833	36054.3	40177.6	35048.4	30402.2	3586.14	61045.9	36842.4	64689.1	2468.63	1973.49	1461.43	2675.03	1743.55	1837.68	4063.24
[R].SAPGGGSKVPQK.[K]	1xBiotin [K8]	3	3	P06748	P06748 [143-154]	P06748 1xBiotin [K150]	Nucleophosmin OS=Homo sapiens OX=9606 GN=NPM1 PE=1 SV=2	1	1338.68	39	97.6	96.7	129.4	113.3	124.1	38.5	52.2	28	116.9	96.3	88.1	52.2	95.4	106.7	136.5	111.8	127.7	82.5	140.7	111.9	102.2	122.5	189.9	2363.39	3203.43	1720.17	7176.41	5912.97	5407.91	3204.96	5858.37	6553.03	8382.47	6862.14	7842.93	5064.93	8638.3	6870.18	6273.92
[R].CGKIVYPTEK.[V]	1xBiotin [K3]; 1xCarbamidomethyl [C1]	2	7	Q14847	Q14847 [8-17]	Q14847 1xBiotin [K10]	LIM and SH3 domain protein 1 OS=Homo sapiens OX=9606 GN=LASP1 PE=1 SV=2	1	1420.7	157.5	238.3	137.5	28.1	16.3	22.3	149.5	169.1	122.2	252.3	226.3	171.4	241.8	130.6	121.8	20.5	33.5	26.7	40	15.2	15.4	21.2	15.1	27.1	14867.7	16816.8	12154.8	25089.7	22504.8	17042.4	24042.4	12982.6	12114.7	2034.77	3330.9	2657.32	3979.42	1512.22	1534.58	2109.68
[K].SSTPGLKSNTPTPR.[N]	1xBiotin [K7]	7	6	Q04726	Q04726 [310-323]	Q04726 1xBiotin [K316]	Transducin-like enhancer protein 3 OS=Homo sapiens OX=9606 GN=TLE3 PE=1 SV=2	1	1668.84	154	167.4	165	27.7	45.7	40.3	126.2	144.2	143.5	122.2	234.5	156	153.7	149.6	254.9	25.8	16.5	53.1	31.4	50.7	42.6	17.7	37.5	39.7	12720.6	14537.1	14472.4	12323.3	23645.3	15728.9	15502.7	15087.9	25707	2600.91	1659.51	5355.57	3170.64	5115.87	4298.13	1785.34
[R].VIPGAAEKIER.[T]	1xBiotin [K8]	2	2	Q15019	Q15019 [67-77]	Q15019 1xBiotin [K74]	Septin-2 OS=Homo sapiens OX=9606 GN=SEPTIN2 PE=1 SV=1	1	1408.76	162.4	112.5	144.7	45.5	79.9	54.9	159.1	143.7	174	84.3	144.6	110.2	141.8	109.1	158.6	44.6	44.1	71.3	61.1	78.3	104	41	76.4	53.8	11848.8	10698.7	12955.9	6280.23	10769.9	8208.2	10556.5	8123.42	11808.3	3322.94	3286.79	5308.1	4551.45	5831.54	7747.48	3053.84
[K].TGFGGKFGVQSER.[Q]	1xBiotin [K6]	1	27	Q14247	Q14247 [267-279]	Q14247 1xBiotin [K272]	Src substrate cortactin OS=Homo sapiens OX=9606 GN=CTTN PE=1 SV=2	1	1595.76	171.5	208.3	157.7	18.7	26.3	17.5	134	188.8	165	146.2	200.4	253.8	151.7	146	213.7	18	32.9	17.2	17	25.3	33	25	16.8	15.3	69327.8	97648.7	85365.5	75613.3	103688	131310	78500.2	75508.1	110526	9317.09	17033.8	8890.75	8780.9	13066.3	17054.8	12922.8
[K].ANVGAGKKPK.[E]	1xBiotin [K8]	1	4	P62847	P62847 [123-132]	P62847 1xBiotin [K130]	40S ribosomal protein S24 OS=Homo sapiens OX=9606 GN=RPS24 PE=1 SV=1	1	1195.66	130.7	188.7	173.5	37.6	42.6	26.8	104.3	137.5	124.8	180.1	167.4	254.4	148.7	165.7	196.1	29.3	35.9	42.4	28.4	56.2	40.7	18.7	43.7	25.6	13288.4	17507.7	15893.8	22937.6	21323.8	32395.8	18938.9	21097.8	24974.9	3731.01	4577.58	5395.86	3614.52	7160.79	5179.36	2386.69
[R].MVVPAALKVVR.[L]	1xBiotin [K8]	2	12	P40429	P40429 [118-128]	P40429 1xBiotin [K125]	60S ribosomal protein L13a OS=Homo sapiens OX=9606 GN=RPL13A PE=1 SV=2	1	1408.82	183.8	122	183.8	37.2	41.8	31.6	181.3	143.7	200	227.4	106.5	120.3	181.3	118.4	218.1	39.2	36.7	27.7	41.2	25.6	45.6	12	31.2	43.9	27275.6	21624.7	30092	34212.4	16026.6	18100.5	27274	17808.5	32820.9	5904.75	5514.95	4168.08	6197.98	3854.61	6865.1	1803.74
[K].GTKVVGAQSLK.[E]	1xBiotin [K3]	2	6	P52209	P52209 [49-59]	P52209 1xBiotin [K51]	6-phosphogluconate dehydrogenase, decarboxylating OS=Homo sapiens OX=9606 GN=PGD PE=1 SV=3	1	1313.72	29.2	35.7	55.2	166.6	155.5	157.8	32.1	30	25.8	13.5	68.5	36.7	28	69.5	56.6	171	129.7	181.5	130.5	181	159.5	127.2	197	161.9	3389.36	3171.54	2731.81	1430.8	7240.91	3875.13	2955.56	7343.03	5985.66	18078.6	13707.5	19183.5	13789.7	19136.2	16864.4	13445
[R].AYQKQPTIFQNK.[K]	1xBiotin [K4]	1	16	P62280	P62280 [9-20]	P62280 1xBiotin [K12]	40S ribosomal protein S11 OS=Homo sapiens OX=9606 GN=RPS11 PE=1 SV=3	1	1691.86	159.9	167	171.1	34.7	31.4	35.8	118.1	150	152.4	216.9	124.8	156.7	285.1	135.2	160.6	32.6	22.5	46.4	17.4	29.5	49.1	20.1	33.6	49.3	19383.8	24627.9	25013.6	35601	20485.1	25722.8	46799.2	22192.8	26357.5	5347.1	3691.74	7613.42	2857.52	4839.26	8055.27	3304.21
[K].SKEYFSK.[Q]	1xBiotin [K2]	1	8	Q06830	Q06830 [191-197]	Q06830 1xBiotin [K192]	Peroxiredoxin-1 OS=Homo sapiens OX=9606 GN=PRDX1 PE=1 SV=1	1	1114.52	128.6	150.8	107.4	72.4	67.1	73.7	135.2	123.5	141.9	107	161.2	158.6	113	111.2	115	76.2	59.4	76.6	67	76.6	70.6	46.2	77.5	83.3	45451.3	41503.5	47699.4	35966.3	54164.3	53312.4	37978.5	37356.3	38643.9	25608.7	19951.9	25743.5	22533.3	25744.8	23714.6	15537.3
[R].KPIAGGGGFSDK.[D]	1xBiotin [K1]	4	6	Q8TCZ2	Q8TCZ2 [137-148]	Q8TCZ2 1xBiotin [K137]	CD99 antigen-like protein 2 OS=Homo sapiens OX=9606 GN=CD99L2 PE=1 SV=1	0	1359.67	57.9	43.9	48	189.8	121.7	138.7	58.4	39.9	69.4	30.6	44.2	55.6	29.8	68.1	48.4	218.9	167.7	191.5	119.7	155.6	122.8	67.9	171.5	139.9	2815.78	1924.11	3346.66	1477.81	2133.01	2683.26	1437.58	3281.67	2333.8	10556.4	8088.81	9234.15	5771.62	7504.41	5921.21	3272.46
[-].MKFVYK.[E]	1xBiotin [K2]	1	9	O95166	O95166 [1-6]	O95166 1xBiotin [K2]	Gamma-aminobutyric acid receptor-associated protein OS=Homo sapiens OX=9606 GN=GABARAP PE=1 SV=1	1	1041.53	7.2	25.7	20	187.4	181.8	177.7	6.7	25.3	4.7	23.8	46.7	22.5	15.4	19.9	18.5	173.1	234.1	165.9	187.1	155.5	167.9	131.5	164.1	237.2	2990.36	11345.3	2101.19	10649.8	20923.1	10065	6878.1	8924.15	8291.56	77557.9	104849	74336.4	83799.5	69665.9	75233	58921.3
[K].ANPFGGASHAKGIVLEK.[V]	1xBiotin [K]	1	28	P62266	P62266 [38-54]	P62266 1xBiotin [K]	40S ribosomal protein S23 OS=Homo sapiens OX=9606 GN=RPS23 PE=1 SV=3	1	1922	151.4	144.6	170	44.7	43.3	46	160.6	122	162.1	164.7	65.9	153.4	180.4	188.4	129.5	47.4	41.5	49.9	43.5	46	52.5	45.4	48.8	97.9	155945	118457	157419	159900	63997.9	148964	175192	182881	125700	46035.5	40307.1	48442.1	42217.6	44654.3	50986.7	44108.4
[K].DGKYSQVLANGLDNK.[L]	1xBiotin [K3]	1	7	P62269	P62269 [92-106]	P62269 1xBiotin [K94]	40S ribosomal protein S18 OS=Homo sapiens OX=9606 GN=RPS18 PE=1 SV=3	1	1847.9	178.7	76.7	212.1	47.5	43.9	41.2	223.5	166.9	168.4	141	72.2	24.6	199.8	268.2	159	44.7	41.5	45.3	58	41.4	35	38.8	45	26.8	15642.8	11678.7	11783.6	9871.76	5056.14	1725.19	13982.9	18768.8	11128.6	3131.24	2906.81	3168.33	4058.9	2895.81	2446.48	2714.7
[R].SGYYKVLGK.[G]	1xBiotin [K5]	1	12	P46776	P46776 [106-114]	P46776 1xBiotin [K110]	60S ribosomal protein L27a OS=Homo sapiens OX=9606 GN=RPL27A PE=1 SV=2	1	1240.64	133.2	139.7	181	38.8	54.1	53.1	142.8	121.6	135.4	142	126.6	155.3	154.4	186.9	183.9	39.5	39.1	67.1	18.1	95.5	55	22.3	54	60.6	23221.1	19775.2	22010.5	23083	20578	25243.2	25094.1	30380.6	29897.2	6416.81	6356.92	10913.6	2947.73	15529.8	8936.57	3623.27
[K].AKSGYFLSISDSK.[C]	1xBiotin [K2]	4	6	Q86SQ4	Q86SQ4 [218-230]	Q86SQ4 1xBiotin [K219]	Adhesion G-protein coupled receptor G6 OS=Homo sapiens OX=9606 GN=ADGRG6 PE=1 SV=3	1	1628.8	48.9	71.5	101.3	137.8	110.6	129.9	72.7	43.2	48.6	45.6	83.2	71.1	85.3	102.4	100.8	137.1	122.6	138.6	110.1	125	96.8	189.8	98	129.2	3258.2	1935.48	2179.39	2043.97	3729.51	3190.26	3826	4592.85	4520.48	6145.94	5496.01	6216.87	4935.57	5605.83	4340.23	8510.29
[K].AGLVIGKGGETIK.[Q]	1xBiotin [K]	3	14	Q96AE4; Q92945	Q96AE4 [197-209]; Q92945 [245-257]	Q96AE4 1xBiotin [K]; Q92945 1xBiotin [K]	Far upstream element-binding protein 1 OS=Homo sapiens OX=9606 GN=FUBP1 PE=1 SV=3 Far upstream element-binding protein 2 OS=Homo sapiens OX=9606 GN=KHSRP PE=1 SV=4	1	1468.82	159.8	158.5	156.4	42.2	43.2	39.8	176	130.2	157.6	146.6	182.8	156.2	143.1	165.3	154.2	29.2	54.4	41.6	42.5	59.6	42.6	39.3	42.7	36	23014	17032.8	20612.4	19169.3	23911	20434.2	18719.8	21615	20173.6	3822.38	7111.89	5444.83	5554.98	7800.89	5573.84	5134.62
[K].KVVNPLFEK.[R]	1xBiotin [K1]	1	6	P62424	P62424 [26-34]	P62424 1xBiotin [K26]	60S ribosomal protein L7a OS=Homo sapiens OX=9606 GN=RPL7A PE=1 SV=2	1	1299.71	175.2	142.7	215.1	28.4	20.4	18.2	161.8	150.4	200.2	128.5	192.3	131.8	195	203.6	198.6	54.6	20.2	26.2	16.4	40.1	18.8	16.8	16.2	28.4	27799.4	25844.8	34409.1	22076.7	33038.8	22640.3	33502.8	34993.1	34130	9376.44	3462.74	4509.65	2819.68	6894.78	3233.1	2891.91
[K].FSPVTPKFTPVASK.[F]	1xBiotin [K7]	2	5	Q15942	Q15942 [266-279]	Q15942 1xBiotin [K272]	Zyxin OS=Homo sapiens OX=9606 GN=ZYX PE=1 SV=1	1	1731.91	189.9	169.2	125.1	46.5	40.2	29	173	159.5	219.6	154.1	136.4	217.5	209.6	106.3	114	48.1	42.3	23.1	43.7	36.6	35.2	26.4	29.4	25.2	15491.6	14278.7	19665.9	13798.9	12210.6	19479.9	18767.9	9517.13	10204.1	4304.58	3790.72	2072.5	3913.03	3281.66	3149.29	2367.61
[R].LGKIVDR.[I]	1xBiotin [K3]	1	1	Q15293	Q15293 [84-90]	Q15293 1xBiotin [K86]	Reticulocalbin-1 OS=Homo sapiens OX=9606 GN=RCN1 PE=1 SV=1	1	1026.58	179.5	173.4	149.7	37.7	26.8	32.9	177.2	175.5	241.4	144.2	189.1	171.2	83.9	174.8	147.7	37.2	31.1	42	25.7	37.2	26.5	33.6	29.3	32.5	17107.7	16943.9	23299.2	13920.5	18254.6	16523.4	8103.35	16872.7	14261.5	3589.82	3002.29	4054.39	2481.26	3590.1	2554.96	3242.97
[K].IMSSPLSKELR.[Q]	1xBiotin [K8]	2	6	P61254	P61254 [29-39]	P61254 1xBiotin [K36]	60S ribosomal protein L26 OS=Homo sapiens OX=9606 GN=RPL26 PE=1 SV=1	1	1486.78	172.6	144.5	177.4	31.9	35.7	38	156.4	216	173.5	98.6	148	145.2	180.4	166	178.3	32	55.7	26.5	35.9	29.7	38.1	50.4	31.2	38.2	11674.6	16126.4	12950.2	7357.96	11048.1	10843.9	13467.8	12390.8	13314.8	2392.89	4160.77	1980.42	2677.03	2214.51	2846.95	3766.23
[K].IMSSPLSKELR.[Q]	1xBiotin [K8]; 1xOxidation [M2]	2	7	P61254	P61254 [29-39]	P61254 1xBiotin [K36]	60S ribosomal protein L26 OS=Homo sapiens OX=9606 GN=RPL26 PE=1 SV=1	1	1502.77	144.5	152	206.3	27.5	28.6	41.2	194.1	140.2	140.2	147.5	173.3	139.6	200.3	171.1	216.1	26.3	30.1	26.7	34.8	27.8	22.3	40	23.9	45.9	17119	12359.2	12365.8	13008.6	15285.4	12308.6	17662.2	15091.6	19057.2	2317.33	2652.89	2355.93	3064.65	2447.47	1963.47	3523.09
[R].GFGGKFGVQMDR.[V]	1xBiotin [K5]	3	17	Q14247	Q14247 [120-131]	Q14247 1xBiotin [K124]	Src substrate cortactin OS=Homo sapiens OX=9606 GN=CTTN PE=1 SV=2	1	1524.71	143.3	159.9	265	13.7	8.1	10.1	123.9	136.6	180.6	240.7	105.8	152.5	319.6	252.6	166.5	29.4	12	13	21.9	7.7	7.2	9.6	10.9	9.5	27428.3	30239.2	39991.3	53304	23427.3	33761.7	70760.2	55931.9	36874.6	6515.6	2657.9	2885.94	4843.67	1701.47	1593.37	2127.92
[R].YKLLLYGLHHGK.[R]	1xBiotin [K2]	3	4	P22105-1	P22105-1 [1840-1851]	P22105-1 1xBiotin [K1841]	Isoform 3 of Tenascin-X OS=Homo sapiens OX=9606 GN=TNXB	1	1667.91	43.3	52.5	103.7	179.7	118.3	102.6	39.9	63	39.9	152.1	48.4	32.1	38.1	95.7	113.1	165.8	178.8	132.6	109.1	137	103.1	94.6	78	178.7	2108.41	3331.48	2110.62	8044.95	2559.21	1699.42	2015.07	5061.14	5984.4	8767.06	9454.2	7015.02	5771	7247.97	5451.17	5004
[K].FTPVASKFSPGAPGGSGSQPNQK.[L]	1xBiotin [K7]	2	6	Q15942	Q15942 [273-295]	Q15942 1xBiotin [K279]	Zyxin OS=Homo sapiens OX=9606 GN=ZYX PE=1 SV=1	1	2472.2	171.7	180.1	172.5	16.2	31.2	28.2	134.1	168.9	204.6	150.3	191.3	177.1	169.7	182.4	154.3	16	15.8	31.5	30.5	58.5	30.7	30.9	25.7	27.8	21697.2	27321.2	33087.1	24304.2	30935.9	28650.9	27442.9	29493.8	24948.6	2585.29	2548.3	5095.33	4928.83	9469.58	4968.47	4997.17
[R].TNSGGGDGPHISSKVR.[V]	1xBiotin [K14]	1	2	Q96EV2	Q96EV2 [971-986]	Q96EV2 1xBiotin [K984]	RNA-binding protein 33 OS=Homo sapiens OX=9606 GN=RBM33 PE=1 SV=3	1	1794.86	150.5	178.7	153.6	43.6	31.9	41.7	141.2	180.5	130.2	104.5	167.7	325.6	115.7	144.1	161.9	42.8	25.7	41	22.6	30	43.8	38.4	39.2	45.3	11681.9	14926.8	10765.7	8638.98	13872.2	26929.8	9567.27	11921.8	13387.5	3541.68	2122.72	3388.11	1871.77	2478.41	3623.06	3173.18
[K].AIHNKVNIVPVIAK.[A]	1xBiotin [K5]	3	52	Q15019	Q15019 [170-183]	Q15019 1xBiotin [K174]	Septin-2 OS=Homo sapiens OX=9606 GN=SEPTIN2 PE=1 SV=1	1	1742.01	150.6	123.2	151.3	57.7	62.3	54.8	113.7	146.5	146.6	150.1	91.9	119.9	138.3	147.3	198.4	56.2	46.5	59.8	60.6	101	55.5	69.1	45.3	53.4	85954.7	110751	110782	113453	69453.5	90648.1	104543	111319	149934	42454.9	35165.3	45209.5	45829.2	76331	41945.4	52207
[truncated: 756 more rows]
[truncated: 32 more columns]

## Sheet: P<0.05 DM all
Annotated Sequence	Modifications	# Proteins	# PSMs	Master Protein Accessions	Positions in Master Proteins	Modifications in Master Proteins	Master Protein Descriptions	# Missed Cleavages	Theo. MH+ [Da]	Abundances (Normalized): F7: Sample, 1 H226 AGIA-FabiD DMSO n=1	Abundances (Normalized): F13: Sample, 1 H226 AGIA-FabiD DMSO n=2	Abundances (Normalized): F27: Sample, 1 H226 AGIA-FabiD DMSO n=3	Abundances (Normalized): F8: Sample, 2 H226 AGIA-FabiD DMSO EGF n=1	Abundances (Normalized): F14: Sample, 2 H226 AGIA-FabiD DMSO EGF n=2	Abundances (Normalized): F28: Sample, 2 H226 AGIA-FabiD DMSO EGF n=3	Abundances (Normalized): F9: Sample, 3 H226 AGIA-FabiD Gefitinib EGF n=1	Abundances (Normalized): F23: Sample, 3 H226 AGIA-FabiD Gefitinib EGF n=2	Abundances (Normalized): F29: Sample, 3 H226 AGIA-FabiD Gefitinib EGF n=3	Abundances (Normalized): F10: Sample, 4 H226 EGFR-FabID DMSO n=1	Abundances (Normalized): F24: Sample, 4 H226 EGFR-FabID DMSO n=2	Abundances (Normalized): F30: Sample, 4 H226 EGFR-FabID DMSO n=3	Abundances (Normalized): F11: Sample, 5 H226 EGFR-FabID DMSO EGF n=1	Abundances (Normalized): F25: Sample, 5 H226 EGFR-FabID DMSO EGF n=2	Abundances (Normalized): F31: Sample, 5 H226 EGFR-FabID DMSO EGF n=3	Abundances (Normalized): F12: Sample, 6 H226 EGFR-FabID Gefitinib EGF n=1	Abundances (Normalized): F26: Sample, 6 H226 EGFR-FabID Gefitinib EGF n=1	Abundances (Normalized): F33: Sample, 6 H226 EGFR-FabID Gefitinib EGF n=3	Found in Sample: [S7] F7: Sample, 1	Found in Sample: [S13] F13: Sample, 1	Found in Sample: [S27] F27: Sample, 1	Found in Sample: [S8] F8: Sample, 2	Found in Sample: [S14] F14: Sample, 2	Found in Sample: [S28] F28: Sample, 2	Found in Sample: [S9] F9: Sample, 3	Found in Sample: [S23] F23: Sample, 3	Found in Sample: [S29] F29: Sample, 3	Found in Sample: [S10] F10: Sample, 4	Found in Sample: [S24] F24: Sample, 4	Found in Sample: [S30] F30: Sample, 4	Found in Sample: [S11] F11: Sample, 5	Found in Sample: [S25] F25: Sample, 5	Found in Sample: [S31] F31: Sample, 5	Found in Sample: [S12] F12: Sample, 6	Found in Sample: [S26] F26: Sample, 6	Found in Sample: [S33] F33: Sample, 6	Confidence (by Search Engine): Sequest HT	InOut	HasTM	UniProt subcellular location
[truncated: 114 more rows]
[truncated: 5 more columns]

[truncated: 7 more sheets: P<0.05 DM membrane, EGFR-DM EGF AGIA-DM EGF, P<0.05 EGF all, P<0.05 EGF membrane, EGFR-Gef EGF AGIA-Gef EGF, P<0.05 EGF Gef all, P<0.05 EGF gef membrane]
