# Supplementary material for: Proximity extracellular protein-protein interaction analysis of EGFR using AirID-conjugated fragment of antigen binding
Source: Nat Commun. 2023 Dec 14;14:8301. doi: 10.1038/s41467-023-43931-7 (PMC10721602; doi:10.1038/s41467-023-43931-7)
Supplement: Supplementary file 8 — Supplementary Data 5 [file 41467_2023_43931_MOESM8_ESM.xlsx]

## Sheet: protein
Protein FDR Confidence: Combined	Accession	Description	Coverage [%]	# Peptides	# PSMs	# Unique Peptides	# AAs	MW [kDa]	calc. pI	Score Sequest HT: Sequest HT	Biological Process	Cellular Component	Molecular Function	Pfam IDs	Entrez Gene ID	Ensembl Gene ID	Gene Symbol	Chromosome	KEGG Pathways	Reactome Pathways	WikiPathways	Abundances (Normalized): F5: Sample, 1 A431-AGIA-FabID DMSO n=1	Abundances (Normalized): F15: Sample, 1 A431-AGIA-FabID DMSO n=2	Abundances (Normalized): F21: Sample, 1 A431-AGIA-FabID DMSO n=3	Abundances (Normalized): F8: Sample, 10 A431-EGFR-FabID DMSO n=1	Abundances (Normalized): F18: Sample, 10 A431-EGFR-FabID DMSO n=2	Abundances (Normalized): F24: Sample, 10 A431-EGFR-FabID DMSO n=3	Abundances (Normalized): F9: Sample, 13 A431-EGFR-FabID DMSO EGF n=1	Abundances (Normalized): F19: Sample, 13 A431-EGFR-FabID DMSO EGF n=2	Abundances (Normalized): F25: Sample, 13 A431-EGFR-FabID DMSO EGF n=3	Abundances (Normalized): F10: Sample, 16 A431-EGFR-FabID Gefitinib EGF n=1	Abundances (Normalized): F20: Sample, 16 A431-EGFR-FabID Gefitinib EGF n=2	Abundances (Normalized): F26: Sample, 16 A431-EGFR-FabID Gefitinib EGF n=3	Abundances (Normalized): F6: Sample, 4 A431-AGIA-FabID DMSO EGF n=1	Abundances (Normalized): F16: Sample, 4 A431-AGIA-FabID DMSO EGF n=2	Abundances (Normalized): F22: Sample, 4 A431-AGIA-FabID DMSO EGF n=3	Abundances (Normalized): F7: Sample, 7 A431-AGIA-FabID Gefitinib EGF n=1	Abundances (Normalized): F17: Sample, 7 A431-AGIA-FabID Gefitinib EGF n=2	Abundances (Normalized): F23: Sample, 7 A431-AGIA-FabID Gefitinib EGF n=3	Found in Sample: [S5] F5: Sample, 1 AGIA-FabID DMSO n=1	Found in Sample: [S15] F15: Sample, 1 AGIA-FabID DMSO n=2	Found in Sample: [S21] F21: Sample, 1 AGIA-FabID DMSO n=3	Found in Sample: [S8] F8: Sample, 10 AGIA-FabID DMSO EGF n=1	Found in Sample: [S18] F18: Sample, 10 AGIA-FabID DMSO EGF n=2	Found in Sample: [S24] F24: Sample, 10 AGIA-FabID DMSO EGF n=3	Found in Sample: [S9] F9: Sample, 13 EGFR-FabID DMSO EGF n=1	Found in Sample: [S19] F19: Sample, 13 EGFR-FabID DMSO EGF n=2	Found in Sample: [S25] F25: Sample, 13 EGFR-FabID DMSO EGF n=3	Found in Sample: [S10] F10: Sample, 16 EGFR-FabID Gefitinib EGF n=1
High	EMab-134	Light	28	6	259	6	238	26.3	5.82	724.36												14213.7	20021.1	25430.3	9.70773e+06	1.17024e+07	1.09733e+07	9.41389e+06	1.05267e+07	1.10556e+07	1.0321e+07	1.09025e+07	9.83255e+06	17281.2	25787.7	15534.3	18061	20543.6	20042.6	High	Peak Found	Peak Found	High	High	High	High	High	High	High
High	Q13308-1	Inactive tyrosine-protein kinase 7 [OS=Homo sapiens]	3	2	29	2	1070	118.3	7.09	79.87	cell differentiation;cell organization and biogenesis;cellular component movement;metabolic process;regulation of biological process;response to stimulus	membrane	catalytic activity;nucleotide binding;protein binding	Pf00047, Pf00069, Pf07679, Pf07714, Pf13895, Pf13927, Pf14575	5754	ENSG00000112655.15	PTK7	6				24274.3	28197.5	42178.2	453299	616067	728303	566859	512657	616973	621625	708099	662328	24098.9	24319.7	36591.9	6988.13	9521.14	19366.1	Peak Found	Peak Found	High	High	High	High	High	High	High	High
High	P04156-1	Major prion protein [OS=Homo sapiens]	8	1	10	1	253	27.6	9	32.16	cell organization and biogenesis;cellular homeostasis;metabolic process;regulation of biological process;response to stimulus	cell surface;cytoplasm;cytosol;endoplasmic reticulum;Golgi;membrane;nucleus	metal ion binding;protein binding;receptor activity;signal transducer activity	Pf00377, Pf11587	5621	ENSG00000171867.16	PRNP	20	Prion diseases	NCAM1 interactions	Copper homeostasis	2079.46	3274.6	3076.31	44422	50190.7	52804.4	55356.1	61868.8	63652.1	39962.6	61421	53736.6	3718.9	2549.82	3146.03	2150.13	2016.3	2157.99	Not Found	Not Found	Not Found	High	High	High	High	High	High	High
High	P35052	Glypican-1 [OS=Homo sapiens]	8	3	89	3	558	61.6	7.3	233.57	cell differentiation;cellular component movement;metabolic process;regulation of biological process	cytosol;endosome;extracellular;membrane;organelle lumen	metal ion binding;protein binding	Pf01153	2817	ENSG00000063660.8	GPC1	2	Proteoglycans in cancer	Defective B4GALT7 causes EDS, progeroid type; Retinoid metabolism and transport; Defective EXT2 causes exostoses 2; Defective EXT1 causes exostoses 1, TRPS2 and CHDS; Signaling by GPCR; HS-GAG biosynthesis; A tetrasaccharide linker sequence is required for GAG synthesis; Signaling by ROBO receptors; Cell surface interactions at the vascular wall; Defective B3GALT6 causes EDSP2 and SEMDJL1; HS-GAG…	VEGFA-VEGFR2 Signaling Pathway	15884.8	29737.4	23959.9	291187	346167	421127	327242	325976	431021	340250	415173	429368	33249.2	33705.1	26961.9	12009.6	17326.9	20760.3	Not Found	High	Peak Found	High	High	High	High	High	High	High
High	Q9Y5Y6	suppressor of tumorigenicity 14 protein [OS=Homo sapiens]	3	2	41	2	855	94.7	6.55	131.42	cell death;cell differentiation;cell organization and biogenesis;metabolic process	extracellular;membrane	catalytic activity;protein binding	Pf00057, Pf00089, Pf00431, Pf01390, Pf02408, Pf09342	6768	ENSG00000149418.10	ST14	11	MicroRNAs in cancer	Formation of the cornified envelope		6101.29	6182.58	6744.03	120683	143959	167731	47820.8	186720	116466	76259.3	139938	69923.3	7781.93	4610.34	6668.88	5640.49	5705.65	7939.53	Not Found	Not Found	Not Found	High	High	High	High	High	High	High
High	P78536-1	Disintegrin and metalloproteinase domain-containing protein 17 [OS=Homo sapiens]	1	1	5	1	824	93	5.76	8.06	cell differentiation;cellular component movement;defense response;metabolic process;regulation of biological process;response to stimulus	cell surface;cytoplasm;cytoskeleton;cytosol;membrane	catalytic activity;metal ion binding;protein binding	Pf00200, Pf01421, Pf01562, Pf13574, Pf13582, Pf13583, Pf13688	6868	ENSG00000151694.12	ADAM17	2	Alzheimer's disease; Notch signaling pathway; Epithelial cell signaling in Helicobacter pylori infection	Collagen degradation; Activated NOTCH1 Transmits Signal to the Nucleus; Constitutive Signaling by NOTCH1 t(7;9)(NOTCH1:M1580_K2555) Translocation Mutant; Regulated proteolysis of p75NTR; Release of Hh-Np from the secreting cell; Constitutive Signaling by NOTCH1 HD+PEST Domain Mutants; TNF signaling; Constitutive Signaling by NOTCH1 PEST Domain Mutants; Nuclear signaling by ERBB4; Constitutive Sig…	Alzheimers Disease; Brain-Derived Neurotrophic Factor (BDNF) signaling pathway; Notch Signaling Pathway; Copper homeostasis; Notch Signaling Pathway	3959.03	5986.95	6521.24	11364.7	13221.8	15977.6	12843.8	11803.5	14340.6	33218.6	37212.4	35138.2	1726.65	3126.67	2641.08	2886.17	4054.68	2817.48	Not Found	Peak Found	Peak Found	Peak Found	Peak Found	High	Peak Found	High	High	Peak Found
High	P00533-1	epidermal growth factor receptor [OS=Homo sapiens]	5	7	127	7	1210	134.2	6.68	287.75	cell organization and biogenesis;cell proliferation;cellular component movement;development;metabolic process;regulation of biological process;response to stimulus	cell surface;cytoplasm;endoplasmic reticulum;endosome;extracellular;Golgi;membrane;nucleus;organelle lumen	catalytic activity;DNA binding;enzyme regulator activity;nucleotide binding;protein binding;receptor activity;signal transducer activity	Pf00069, Pf00757, Pf01030, Pf07714, Pf14843	1956	ENSG00000146648.17	EGFR	7	Endocytosis; Dorso-ventral axis formation; HIF-1 signaling pathway; Central carbon metabolism in cancer; Pancreatic cancer; FoxO signaling pathway; MicroRNAs in cancer; Phospholipase D signaling pathway; Cytokine-cytokine receptor interaction; Rap1 signaling pathway; Non-small cell lung cancer; MAPK signaling pathway; Oxytocin signaling pathway; Endometrial cancer; Breast cancer; ErbB signaling p…	EGFR interacts with phospholipase C-gamma; TFAP2 (AP-2) family regulates transcription of growth factors and their receptors; SHC1 events in ERBB2 signaling; EGFR downregulation; Signaling by GPCR; ERBB2 Regulates Cell Motility; GRB2 events in EGFR signaling; EGFR Transactivation by Gastrin; ERBB2 Activates PTK6 Signaling; Constitutive Signaling by Aberrant PI3K in Cancer; Interleukin-20 family s…	Androgen receptor signaling pathway; Signaling Pathways in Glioblastoma; AGE/RAGE pathway; Gastric cancer network 2; Spinal Cord Injury; Aryl Hydrocarbon Receptor; Bladder Cancer; TCA Cycle Nutrient Utilization and Invasiveness of Ovarian Cancer; Extracellular vesicle-mediated signaling in recipient cells; Aryl Hydrocarbon Receptor Pathway; Focal Adhesion; Rac1/Pak1/p38/MMP-2 pathway; Association…	1.33663e+06	1.29032e+06	1.33683e+06	1.84646e+06	2.09572e+06	2.64041e+06	2.91881e+06	2.59135e+06	2.69561e+06	2.8122e+06	2.32421e+06	3.0802e+06	822366	727814	521023	218429	298520	272174	High	High	High	High	High	High	High	High	High	High
High	P32926	Desmoglein-3 [OS=Homo sapiens]	7	6	43	6	999	107.5	5	117.05	cell death	cytoskeleton;cytosol;membrane	metal ion binding	Pf00028, Pf01049	1830	ENSG00000134757.4	DSG3	18		Apoptotic cleavage of cell adhesion proteins; Formation of the cornified envelope		20968.4	31134.9	34424.7	84717	72062.1	92047.3	95763.7	67722.1	73680.6	179809	167585	187201	40143.9	32734.7	38917.8	17856.2	18355.6	18041.2	Not Found	Peak Found	High	High	High	High	High	High	High	High
High	Q29983	MHC class I polypeptide-related sequence A [OS=Homo sapiens]	7	3	29	3	383	42.9	6.98	43.11	defense response;regulation of biological process;response to stimulus	cell surface;cytoplasm;membrane	protein binding	Pf00129, Pf07654	100507436	ENSG00000183214.12	MICA	6; CHR_HSCHR6_MHC_QBL_CTG1	Natural killer cell mediated cytotoxicity	Immunoregulatory interactions between a Lymphoid and a non-Lymphoid cell	Allograft Rejection	11734.3	11868.2	15538.2	85521	121988	160047	92241.3	170024	170361	120511	113557	78473.6	16010.2	9836.2	8379.48	11674	13179.1	12582.1	Not Found	Not Found	Not Found	High	High	High	High	High	High	High
High	P05362	Intercellular adhesion molecule 1 [OS=Homo sapiens]	2	1	1	1	532	57.8	7.99	1.85	cell communication;cell organization and biogenesis;cellular component movement;cellular homeostasis;defense response;regulation of biological process;response to stimulus	cell surface;membrane	protein binding;receptor activity;signal transducer activity	Pf03921, Pf07679, Pf13895	3383	ENSG00000090339.8	ICAM1	19	TNF signaling pathway; Epstein-Barr virus infection; Cell adhesion molecules (CAMs); Natural killer cell mediated cytotoxicity; NF-kappa B signaling pathway; AGE-RAGE signaling pathway in diabetic complications; HTLV-I infection; Malaria; Leukocyte transendothelial migration; Viral myocarditis; Staphylococcus aureus infection; Influenza A; African trypanosomiasis; Rheumatoid arthritis	Integrin cell surface interactions; Interleukin-10 signaling; Interleukin-4 and 13 signaling; Immunoregulatory interactions between a Lymphoid and a non-Lymphoid cell; Interferon gamma signaling	Selenium Micronutrient Network; Vitamin B12 Metabolism; Folate Metabolism; RANKL/RANK (Receptor activator of NFKB (ligand)) Signaling Pathway; Interleukin-11 Signaling Pathway; Spinal Cord Injury; IL1 and megakaryocytes in obesity; Photodynamic therapy-induced NF-kB survival signaling; VEGFA-VEGFR2 Signaling Pathway; Type II interferon signaling (IFNG)	4242.02	1981.59	2718.1	9189.58	8562.96	4380.06	10264.3	13451.2	12623	6547.36	13267.6	14899.5	4392.98	1998.34	2749.37	1849.2	3295.02	1746.19	Not Found	Not Found	Not Found	Peak Found	Peak Found	Not Found	Peak Found	Peak Found	High	Peak Found
High	P22223-1	Cadherin-3 [OS=Homo sapiens]	3	2	18	2	829	91.4	4.75	61.6	cell organization and biogenesis;regulation of biological process;response to stimulus	cytoplasm;membrane	metal ion binding	Pf00028, Pf01049	1001	ENSG00000062038.13	CDH3	16	Cell adhesion molecules (CAMs)	Adherens junctions interactions	Overview of nanoparticle effects	4693.34	8133.03	5196.25	41175	73661.5	82642.5	33513.9	81167.5	64579.8	37502.1	87104.4	41969.4	4346.14	7824.12	4977.29	6274.36	5430.83	6036.62	Not Found	Peak Found	Not Found	High	High	High	Peak Found	High	High	High
High	P23528	Cofilin-1 [OS=Homo sapiens]	13	2	5	2	166	18.5	8.09	10.58	cell organization and biogenesis;cellular component movement;metabolic process;regulation of biological process;response to stimulus	cytoplasm;cytoskeleton;cytosol;membrane;nucleus	protein binding	Pf00241	1072	ENSG00000172757.12	CFL1	11	Pertussis; Regulation of actin cytoskeleton; Fc gamma R-mediated phagocytosis; Axon guidance	Platelet degranulation ; Sema3A PAK dependent Axon repulsion; Gene and protein expression by JAK-STAT signaling after Interleukin-12 stimulation; EPHB-mediated forward signaling; Regulation of actin dynamics for phagocytic cup formation; Interleukin-12 family signaling	Brain-Derived Neurotrophic Factor (BDNF) signaling pathway; VEGFA-VEGFR2 Signaling Pathway; EGF/EGFR Signaling Pathway; Regulation of Actin Cytoskeleton; G13 Signaling Pathway	11529.5	3427.41	12803.8	13189.7	13992.2	17302.6	15682.8	15232.1	20979.2	15162	12177.8	20004.6	22654.5	3995.77	3596.75	2404.45	21505.1	2350.49	Peak Found	Not Found	Peak Found	High	High	Peak Found	Peak Found	High	Peak Found	Peak Found
High	P06213-1	insulin receptor [OS=Homo sapiens]	1	1	11	1	1382	156.2	6.2	20.53	cell organization and biogenesis;metabolic process;regulation of biological process;response to stimulus	membrane;organelle lumen	catalytic activity;nucleotide binding;protein binding;receptor activity;signal transducer activity	Pf00041, Pf00069, Pf00757, Pf01030, Pf07714	3643	ENSG00000171105.13	INSR	19	Longevity regulating pathway - multiple species; Insulin signaling pathway; HIF-1 signaling pathway; Ovarian steroidogenesis; FoxO signaling pathway; Phospholipase D signaling pathway; cGMP-PKG signaling pathway; Rap1 signaling pathway; Type II diabetes mellitus; AMPK signaling pathway; mTOR signaling pathway; Aldosterone-regulated sodium reabsorption; Adherens junction; Non-alcoholic fatty liver…	Signal attenuation; Insulin receptor recycling; PI5P, PP2A and IER3 Regulate PI3K/AKT Signaling; IRS activation	AMP-activated Protein Kinase (AMPK) Signaling; Selenium Micronutrient Network; Vitamin B12 Metabolism; Type II diabetes mellitus; Folate Metabolism; AGE/RAGE pathway; Nanoparticle triggered autophagic cell death; Transcription factor regulation in adipogenesis; Angiopoietin Like Protein 8 Regulatory Pathway; Focal Adhesion-PI3K-Akt-mTOR-signaling pathway; Leptin Insulin Overlap; Insulin Signaling…	8627.28	5133.09	7944.46	21895.2	28432.8	25892.2	29040.3	30452.3	33381.3	28850.8	32755.2	23818.7	4653.35	3729.18	4065.73	4231.51	6372.9	5884.54	Not Found	Not Found	Not Found	High	High	High	Peak Found	High	High	Peak Found
High	O15031	Plexin-B2 [OS=Homo sapiens]	1	2	9	2	1838	205	6.24	20.21	cell proliferation;development;regulation of biological process;response to stimulus	cell surface;membrane	protein binding;receptor activity;signal transducer activity	Pf01403, Pf01437, Pf01833, Pf08337	23654	ENSG00000196576.14	PLXNB2	22	Axon guidance			7856.22	6322.43	10463.3	26421.2	25708.9	30927.9	25557.2	33243.1	35230.8	27102.7	22381.2	29058.9	4662.58	9986.66	7464.06	6028.45	6813.25	5545	Not Found	Not Found	Peak Found	High	High	High	Peak Found	High	High	High
High	P01889	HLA class I histocompatibility antigen, B-7 alpha chain [OS=Homo sapiens]	14	3	22	3	362	40.4	5.85	54.66	regulation of biological process;response to stimulus;transport	cell surface;endoplasmic reticulum;Golgi;membrane	protein binding	Pf00129, Pf06623, Pf07654	3106	ENSG00000234745.10	HLA-B	6	Viral carcinogenesis; Endocytosis; Allograft rejection; Epstein-Barr virus infection; Type I diabetes mellitus; Cell adhesion molecules (CAMs); Natural killer cell mediated cytotoxicity; HTLV-I infection; Phagosome; Autoimmune thyroid disease; Herpes simplex infection; Viral myocarditis; Graft-versus-host disease; Antigen processing and presentation	Interferon alpha/beta signaling; ER-Phagosome pathway; Neutrophil degranulation; Immunoregulatory interactions between a Lymphoid and a non-Lymphoid cell; Endosomal/Vacuolar pathway; Interferon gamma signaling; Antigen Presentation: Folding, assembly and peptide loading of class I MHC	Proteasome Degradation; Allograft Rejection; Type II interferon signaling (IFNG)	23445.3	15712.2	14010.7	30528	37959.9	53989.8	36692.6	50922.1	43100.1	52677.4	74051.9	66254.5	32094.1	19684.8	10859.4	18694.9	16775.6	11360.5	Peak Found	Peak Found	Peak Found	High	High	High	High	High	High	High
High	P61769	Beta-2-microglobulin [OS=Homo sapiens]	11	1	3	1	119	13.7	6.52	7.75	cell differentiation;defense response;metabolic process;regulation of biological process;response to stimulus;transport	cell surface;cytosol;extracellular;Golgi;membrane;organelle lumen	protein binding	Pf07654	567	ENSG00000273686.4; ENSG00000166710.17	B2M	15; CHR_HSCHR15_3_CTG8	Antigen processing and presentation	DAP12 signaling; Neutrophil degranulation; Endosomal/Vacuolar pathway; Immunoregulatory interactions between a Lymphoid and a non-Lymphoid cell; Interferon gamma signaling; Amyloid fiber formation; Antigen Presentation: Folding, assembly and peptide loading of class I MHC; ER-Phagosome pathway; Nef mediated downregulation of MHC class I complex cell surface expression		2575.53	25719.8	33011.8	10330.7	13665.1	18844.9	13055.4	15106.1	17650.4	4085.36	10050.4	8249.38	29685.5	47439.8	32831.4	9677.12	1775.69	2141.14	Not Found	Peak Found	Peak Found	Peak Found	Peak Found	Peak Found	Peak Found	Peak Found	High	Not Found
High	P10636-5	Isoform Tau-C of Microtubule-associated protein tau [OS=Homo sapiens]	5	1	6	1	410	42.6	7.37	19.78	cell differentiation;cell organization and biogenesis;cellular component movement;metabolic process;regulation of biological process;response to stimulus;transport	cytoplasm;cytoskeleton;cytosol;membrane;nucleus	DNA binding;protein binding	Pf00418	4137	ENSG00000276155.4; ENSG00000186868.15; ENSG00000277956.4	MAPT	17; CHR_HSCHR17_1_CTG5; CHR_HSCHR17_2_CTG5			IL-5 Signaling Pathway; Regulation of Microtubule Cytoskeleton; Alzheimers Disease; Brain-Derived Neurotrophic Factor (BDNF) signaling pathway; Kit receptor signaling pathway; Copper homeostasis; MAPK Signaling Pathway; IL-2 Signaling Pathway; Notch Signaling Pathway	2124.63	6987.29	7406.61	5644.78	12282.8	24711	13055.9	20741.5	9704.55	4983.16	9219.67	21408.7	8927.26	1953.41	6800.72	2646.2	1987.9	4450.95	Not Found	Peak Found	Peak Found	Peak Found	High	High	Peak Found	High	Peak Found	Peak Found
High	EGFR-fabID	Heavy	16	9	628	2	591	64.5	6.48	1666.28												2.15707e+06	1.76736e+06	1.68207e+06	6.37113e+06	6.95799e+06	6.81447e+06	7.58622e+06	6.90969e+06	6.45907e+06	7.07413e+06	6.75435e+06	5.17349e+06	2.42991e+06	2.17286e+06	1.69853e+06	1.68326e+06	2.18756e+06	1.97984e+06	Not Found	Not Found	Not Found	High	High	High	High	High	High	High
High	Q13151	Heterogeneous nuclear ribonucleoprotein A0 [OS=Homo sapiens]	3	1	2	1	305	30.8	9.29	4.64	defense response;metabolic process;regulation of biological process;response to stimulus	nucleus	protein binding;RNA binding	Pf00076, Pf13893, Pf14259	10949	ENSG00000177733.6	HNRNPA0	5		mRNA Splicing - Major Pathway		1787.11	6155.95	2111.14	8505.75	11118.8	11374.3	8720.08	11170.4	10709	8650.02	7126.87	9745.75	3703.77	7297.99	5466.21	2433.96	2597.33	2642.65	Not Found	Peak Found	Not Found	Peak Found	High	High	Peak Found	Peak Found	Peak Found	Peak Found
High	Q92859	neogenin [OS=Homo sapiens]	1	1	1	1	1461	159.9	6.54	1.75	cellular component movement;regulation of biological process	Golgi;membrane	protein binding;receptor activity	Pf00041, Pf00047, Pf06583, Pf07679, Pf07686, Pf13895, Pf13927	4756	ENSG00000067141.16	NEO1	15	Cell adhesion molecules (CAMs)	Netrin-1 signaling; CDO in myogenesis		4275.8	4440.64	1903.32	7873.04	6988.92	6735.51	11552.2	5641.99	6155.79	10034.1	8034.79	6784.7	2413.69	3146.53	2242.99	2813.62	2439.72	4032.81	Not Found	Not Found	Not Found	Peak Found	Peak Found	Peak Found	Peak Found	High	Peak Found	Peak Found
High	P09651-1	Heterogeneous nuclear ribonucleoprotein A1 [OS=Homo sapiens]	8	2	7	2	372	38.7	9.13	15.44	cell communication;metabolic process;regulation of biological process;response to stimulus;transport	cytoplasm;membrane;nucleus;spliceosomal complex	DNA binding;protein binding;RNA binding	Pf00076, Pf13893, Pf14259	3178	ENSG00000135486.17	HNRNPA1	12	Spliceosome	mRNA Splicing - Major Pathway; FGFR2 alternative splicing	mRNA Processing	3280.33	8776.1	7309.85	8017.53	8184.72	12346.3	8938.78	9076.4	10473	11785.4	7968.15	8794.58	9682.5	7781.6	2701.14	3060.43	7670.42	3113.59	Not Found	Peak Found	Peak Found	Peak Found	High	High	Peak Found	High	High	Peak Found
High	P62805	histone H4 [OS=Homo sapiens]	25	3	28	3	103	11.4	11.36	72.68	cell organization and biogenesis;metabolic process;regulation of biological process;response to stimulus	chromosome;extracellular;membrane;nucleus	DNA binding;protein binding;RNA binding	Pf00125, Pf02969, Pf15630	8359; 8361; 8360; 8363; 8370; 554313; 8365; 8364; 121504; 8367; 8294; 8366; 8362; 8368	ENSG00000197061.4; ENSG00000275126.1; ENSG00000273542.1; ENSG00000197238.4; ENSG00000197837.3; ENSG00000276966.2; ENSG00000158406.4; ENSG00000270882.2; ENSG00000274618.1; ENSG00000278637.1; ENSG00000277157.1; ENSG00000278705.1; ENSG00000270276.2; ENSG00000276180.1	HIST1H4A; HIST1H4F; HIST1H4D; HIST1H4J; HIST2H4A; HIST2H4B; HIST1H4H; HIST1H4C; HIST4H4; HIST1H4E; HIST1H4I; HIST1H4B; HIST1H4K; HIST1H4L	6; 1; 12	Viral carcinogenesis; Systemic lupus erythematosus; Alcoholism	SIRT1 negatively regulates rRNA expression; RMTs methylate histone arginines; Nonhomologous End-Joining (NHEJ); Activation of anterior HOX genes in hindbrain development during early embryogenesis; NoRC negatively regulates rRNA expression; Meiotic synapsis; Transcriptional regulation by small RNAs; Meiotic recombination; PRC2 methylates histones and DNA; Recruitment and ATM-mediated phosphorylat…	Gastric Cancer Network 1; Histone Modifications; Type II interferon signaling (IFNG)	13328.1	12048.7	15836.2	30311.4	49993.8	55122.8	25105	45314	46783	28844.2	47690.1	30291.6	14306.3	13207.7	10135	12048.3	16513.2	10778.4	Not Found	Not Found	Peak Found	High	High	High	High	High	High	High
High	Q16778	Histone H2B type 2-E [OS=Homo sapiens]	68	8	110	1	126	13.9	10.32	272.33	cell organization and biogenesis;defense response;response to stimulus	chromosome;cytosol;nucleus	DNA binding;protein binding	Pf00125, Pf00808	8349	ENSG00000184678.10	HIST2H2BE	1	Viral carcinogenesis; Systemic lupus erythematosus; Alcoholism	SIRT1 negatively regulates rRNA expression; Nonhomologous End-Joining (NHEJ); Activation of anterior HOX genes in hindbrain development during early embryogenesis; NoRC negatively regulates rRNA expression; Meiotic synapsis; Transcriptional regulation by small RNAs; Meiotic recombination; PRC2 methylates histones and DNA; Recruitment and ATM-mediated phosphorylation of repair and signaling protei…		3255.06	3702.88	4099.19	2670.34	8498.73	9993.54	1835.88	8082.99	8306.11	3781.46	6778.26	7487.16	1992.42	2824.12	4384.54	2555.67	2813.92	3428.35	Not Found	Not Found	Not Found	Not Found	High	High	Not Found	Peak Found	High	Not Found
High	P84243	histone H3.3 [OS=Homo sapiens]	35	5	32	5	136	15.3	11.27	58.23	cell differentiation;cell organization and biogenesis;cell proliferation;coagulation;metabolic process;regulation of biological process;response to stimulus	chromosome;extracellular;nucleus	DNA binding;protein binding	Pf00125, Pf15630	3020; 440926; 3021	ENSG00000132475.10; ENSG00000163041.9	H3F3A; H3F3AP4; H3F3B	1; 2; 17	Transcriptional misregulation in cancer; Systemic lupus erythematosus; Alcoholism	SIRT1 negatively regulates rRNA expression; Activation of anterior HOX genes in hindbrain development during early embryogenesis; NoRC negatively regulates rRNA expression; Factors involved in megakaryocyte development and platelet production; Transcriptional regulation by small RNAs; Meiotic recombination; PRC2 methylates histones and DNA; Formation of the beta-catenin:TCF transactivating comple…	Gastric Cancer Network 1; Histone Modifications	33264.7	24416.1	28458.1	45093.7	64692.2	71925.8	57314.3	70954.9	69350.1	54469.2	43673.9	54113.2	37602.1	36965	27659.3	11309.7	22524.9	23423.9	Peak Found	High	High	High	High	High	High	High	High	High
High	Q9Y624	Junctional adhesion molecule A [OS=Homo sapiens]	8	1	8	1	299	32.6	7.9	24.52	cell differentiation;cell organization and biogenesis;cellular component movement;defense response;regulation of biological process;response to stimulus;transport	membrane	protein binding;receptor activity	Pf00047, Pf07679, Pf07686, Pf13895, Pf13927	50848	ENSG00000158769.17	F11R	1	Tight junction; Cell adhesion molecules (CAMs); Leukocyte transendothelial migration; Epithelial cell signaling in Helicobacter pylori infection	Integrin cell surface interactions; Tight junction interactions; Cell surface interactions at the vascular wall; TGF-beta receptor signaling in EMT (epithelial to mesenchymal transition)		2339.52	2868.73	3403.25	22231	21145.9	24733.9	3620.15	23463.7	13552	7913.08	12420.8	2820.24	2507.95	13217.5	3381.27	3370.77	2303.09	4425.58	Not Found	Not Found	Not Found	High	High	High	Not Found	High	High	Peak Found
High	Q14126	Desmoglein-2 [OS=Homo sapiens]	4	3	27	3	1118	122.2	5.24	60.77	cell death;cell organization and biogenesis;regulation of biological process;response to stimulus	cell surface;cytoskeleton;membrane	metal ion binding;protein binding	Pf00028, Pf01049	1829	ENSG00000046604.12	DSG2	18	Arrhythmogenic right ventricular cardiomyopathy (ARVC)	Apoptotic cleavage of cell adhesion proteins; Formation of the cornified envelope	Arrhythmogenic Right Ventricular Cardiomyopathy	43984.2	59657.1	72693.2	46149.3	56720.6	79611.9	73832.7	77434.4	87663.6	62843.5	64814.9	74782.6	72166.3	89797.5	63697.3	8911.79	29387.5	30137.3	Peak Found	High	High	High	High	High	High	High	High	High
High	P16422	Epithelial cell adhesion molecule [OS=Homo sapiens]	6	2	14	2	314	34.9	7.46	25.73	cell differentiation;cellular component movement;regulation of biological process;response to stimulus	cell surface;membrane	protein binding	Pf00086	4072	ENSG00000119888.10	EPCAM	2		Cell surface interactions at the vascular wall		7708.95	13415.7	13822.3	19474.7	19949.9	28337.1	32730.3	21716.8	23286.4	21020.9	15655.2	19495.3	10644.9	19088.3	9762.07	8957.95	10270.2	8465.93	Not Found	Peak Found	Peak Found	Peak Found	High	High	Peak Found	High	High	Peak Found
High	O60814	Histone H2B type 1-K [OS=Homo sapiens]	68	9	126	2	126	13.9	10.32	300.64	cell organization and biogenesis;defense response;metabolic process;response to stimulus	chromosome;cytosol;nucleus	DNA binding;protein binding	Pf00125, Pf00808	85236	ENSG00000197903.7	HIST1H2BK	6	Viral carcinogenesis; Systemic lupus erythematosus; Alcoholism	SIRT1 negatively regulates rRNA expression; Nonhomologous End-Joining (NHEJ); Activation of anterior HOX genes in hindbrain development during early embryogenesis; NoRC negatively regulates rRNA expression; Meiotic synapsis; Transcriptional regulation by small RNAs; Meiotic recombination; PRC2 methylates histones and DNA; Recruitment and ATM-mediated phosphorylation of repair and signaling protei…		89301.5	143146	148531	289199	455926	526772	339713	436347	424580	211780	288728	295337	160777	192618	149388	71544	134419	141192	Peak Found	High	Peak Found	High	High	High	High	High	High	High
High	P62987	Ubiquitin-60S ribosomal protein L40 [OS=Homo sapiens]	18	2	13	2	128	14.7	9.83	31.7	cell communication;cell organization and biogenesis;cellular homeostasis;defense response;metabolic process;regulation of biological process;response to stimulus;transport	cytoplasm;cytosol;endoplasmic reticulum;membrane;nucleus;ribosome	protein binding;structural molecule activity	Pf00240, Pf01020, Pf11976, Pf13019, Pf13881, Pf14560	7311	ENSG00000221983.7	UBA52	19	Ribosome	NOTCH1 Intracellular Domain Regulates Transcription; Activated NOTCH1 Transmits Signal to the Nucleus; Regulation of RAS by GAPs; Viral mRNA Translation; UCH proteinases; ISG15 antiviral mechanism; Regulation of PLK1 Activity at G2/M Transition; Constitutive Signaling by NOTCH1 HD+PEST Domain Mutants; Activated TLR4 signalling; Hh mutants that don't undergo autocatalytic processing are degraded b…	DNA Replication; Cytoplasmic Ribosomal Proteins	7603.64	12599.2	10393	15627.9	22280.7	25010.9	15467.6	22461.7	23472.7	12380.1	15530.2	4298.91	6315.48	4411.38	17510.1	5916.3	5984.14	11238.1	Not Found	Peak Found	Peak Found	High	High	High	High	High	High	High
High	P10412	Histone H1.4 [OS=Homo sapiens]	36	10	70	4	219	21.9	11.03	175.22	cell organization and biogenesis;metabolic process;regulation of biological process	chromosome;nucleus	DNA binding;metal ion binding;nucleotide binding;protein binding;RNA binding	Pf00538	3008	ENSG00000168298.6	HIST1H1E	6		Formation of Senescence-Associated Heterochromatin Foci (SAHF); Activation of DNA fragmentation factor	Pathways Affected in Adenoid Cystic Carcinoma	31784.2	72781.5	72727.6	123472	185093	212765	155541	197238	181083	98825.1	138335	124929	78757	120547	81466.1	31280.9	62449.5	72990.5	Not Found	Peak Found	Peak Found	High	High	High	High	High	High	High
High	Q8NC51-1	Plasminogen activator inhibitor 1 RNA-binding protein [OS=Homo sapiens]	23	5	67	5	408	44.9	8.65	240.95	regulation of biological process	cytoplasm;cytosol;membrane;nucleus	protein binding;RNA binding	Pf04774	26135	ENSG00000142864.14	SERBP1	1			Apoptosis-related network due to altered Notch3 in ovarian cancer	79631.9	141262	143115	255866	435239	553454	304843	434011	461262	332415	417893	388870	144314	230040	218059	68132	196850	197420	High	High	High	High	High	High	High	High	High	High
High	P11142-1	Heat shock cognate 71 kDa protein [OS=Homo sapiens]	4	2	6	1	646	70.9	5.52	18.33	cell communication;cell organization and biogenesis;metabolic process;regulation of biological process;response to stimulus;transport	cytoplasm;cytosol;endosome;extracellular;membrane;nucleus;organelle lumen;spliceosomal complex	catalytic activity;nucleotide binding;protein binding;RNA binding	Pf00012, Pf02463, Pf06723	3312	ENSG00000109971.13	HSPA8	11	Endocytosis; Longevity regulating pathway - multiple species; Epstein-Barr virus infection; Spliceosome; MAPK signaling pathway; Protein processing in endoplasmic reticulum; Toxoplasmosis; Measles; Influenza A; Estrogen signaling pathway; Legionellosis; Antigen processing and presentation	Protein methylation; Clathrin-mediated endocytosis; Regulation of HSF1-mediated heat shock response; Golgi Associated Vesicle Biogenesis; GABA synthesis, release, reuptake and degradation; Lysosome Vesicle Biogenesis; CHL1 interactions; AUF1 (hnRNP D0) binds and destabilizes mRNA; Attenuation phase; Neutrophil degranulation; mRNA Splicing - Major Pathway; Interleukin-4 and 13 signaling; HSP90 cha…	Parkin-Ubiquitin Proteasomal System pathway; MAPK Signaling Pathway; Exercise-induced Circadian Regulation	2090.53	2032.7	4133.01	3486	6650.09	7038.75	3580.24	7323.43	4082.77	3309.09	3807.59	4457.28	3044.44	4086.89	3151.64	1934.43	3091.48	1856.23	Not Found	Not Found	Not Found	Not Found	High	High	Not Found	High	Peak Found	Not Found
High	P03956	Interstitial collagenase [OS=Homo sapiens]	2	1	7	1	469	54	6.96	14.76	cell organization and biogenesis;cellular component movement;metabolic process;regulation of biological process	extracellular	catalytic activity;metal ion binding	Pf00045, Pf00413, Pf01471, Pf13688	4312	ENSG00000196611.4	MMP1	11	PPAR signaling pathway; Pathways in cancer; Bladder cancer; Rheumatoid arthritis	Collagen degradation; Regulation of Insulin-like Growth Factor (IGF) transport and uptake by Insulin-like Growth Factor Binding Proteins (IGFBPs); Basigin interactions; Activation of Matrix Metalloproteinases; Interleukin-4 and 13 signaling	Matrix Metalloproteinases; Oncostatin M Signaling Pathway; Quercetin and Nf-kB/ AP-1 Induced Cell Apoptosis; Bladder Cancer; Photodynamic therapy-induced NF-kB survival signaling; Hepatitis C and Hepatocellular Carcinoma; TGF-beta Signaling Pathway; PPAR signaling pathway	2120.26	1740.98	3354.65	6479.19	9974.88	9319.31	9700.94	9058.46	8168.28	9624.64	7455.42	6212.84	2371.2	4038.77	3930.88	3794.45	4322.07	2993.05	Not Found	Not Found	Not Found	High	High	High	Peak Found	High	High	Peak Found
High	P09874	Poly [ADP-ribose] polymerase 1 [OS=Homo sapiens]	1	1	2	1	1014	113	8.88	0	cell death;cell differentiation;cell organization and biogenesis;metabolic process;regulation of biological process;response to stimulus	membrane;mitochondrion;nucleus	catalytic activity;DNA binding;metal ion binding;nucleotide binding;protein binding;RNA binding	Pf00533, Pf00644, Pf00645, Pf02877, Pf05406, Pf08063	142	ENSG00000143799.12	PARP1	1	Base excision repair; NF-kappa B signaling pathway; Apoptosis	POLB-Dependent Long Patch Base Excision Repair; Dual Incision in GG-NER; Formation of Incision Complex in GG-NER; Downregulation of SMAD2/3:SMAD4 transcriptional activity; DNA Damage Recognition in GG-NER; HDR through MMEJ (alt-NHEJ); SUMOylation of DNA damage response and repair proteins	Corticotropin-releasing hormone signaling pathway; Nanoparticle triggered regulated necrosis; Fas Ligand (FasL) pathway and Stress induction of Heat Shock Proteins (HSP) regulation; NAD metabolism, sirtuins and aging; NAD+ metabolism; NAD+ biosynthetic pathways	4184.01	3174.09	2255.06	4041.51	5085.07	6729.85	5007.61	6463.05	6274.45	5072.83	5562.64	5620.05	4111.84	4157.15	2572.17	2835.24	1894.87	4464.45	Not Found	Not Found	Not Found	Peak Found	High	Peak Found	Peak Found	High	Peak Found	Peak Found
High	P02786	Transferrin receptor protein 1 [OS=Homo sapiens]	1	1	8	1	760	84.8	6.61	18.26	cell differentiation;cell organization and biogenesis;cellular homeostasis;metabolic process;regulation of biological process;response to stimulus;transport	cell surface;endosome;extracellular;membrane	protein binding;receptor activity;RNA binding;transporter activity	Pf02225, Pf04253, Pf04389	7037	ENSG00000072274.12	TFRC	3	Endocytosis; HIF-1 signaling pathway; Hematopoietic cell lineage; Phagosome	Cargo recognition for clathrin-mediated endocytosis; Transferrin endocytosis and recycling; Golgi Associated Vesicle Biogenesis	Iron metabolism in placenta	12679.7	14828.9	8746.86	6746.68	9021.88	7000.02	8928.94	7406.46	8161.52	7907.79	4264.08	3146.95	21015.3	19160.2	13005	2264.09	3068.55	2163.85	Peak Found	High	Peak Found	High	High	High	Peak Found	High	High	Peak Found
High	P52799	Ephrin-B2 [OS=Homo sapiens]	4	1	5	1	333	36.9	8.85	10.27	cell communication;cell differentiation;cellular component movement;development;regulation of biological process;response to stimulus	membrane	protein binding;receptor activity	Pf00812	1948	ENSG00000125266.6	EFNB2	13	Axon guidance	EPH-ephrin mediated repulsion of cells; Ephrin signaling; EPHB-mediated forward signaling	Spinal Cord Injury	3420.96	2033.43	2920.69	2346.72	2995.75	6170.92	4677.94	4390.8	3066.11	4344.97	3776.98	2527.73	1917.47	3567.75	1915.19	2065.4	1854.68	3218.45	Not Found	Not Found	Not Found	Not Found	High	High	High	High	High	Not Found
High	Q96PD2-1	Discoidin, CUB and LCCL domain-containing protein 2 [OS=Homo sapiens]	1	1	3	1	775	85	7.17	4.35	regulation of biological process;response to stimulus	cell surface;membrane	protein binding	Pf00431, Pf00754, Pf03815	131566	ENSG00000057019.15	DCBLD2	3				2149.65	2225.77	3490.57	5425.17	8396.39	7363.59	7315.74	7120.65	5870.82	5382.58	6326.54	7122.39	2020.93	4316.4	2217.71	3523.1	2268.79	3484.87	Not Found	Not Found	Not Found	High	High	High	Peak Found	Peak Found	Peak Found	Peak Found
High	P33151	Cadherin-5 [OS=Homo sapiens]	6	5	28	5	784	87.5	5.43	56.39	cell organization and biogenesis;regulation of biological process;response to stimulus	cell surface;membrane	metal ion binding;protein binding	Pf00028, Pf01049	1003	ENSG00000179776.17	CDH5	16	Cell adhesion molecules (CAMs); Leukocyte transendothelial migration	VEGFR2 mediated vascular permeability; Adherens junctions interactions	VEGFA-VEGFR2 Signaling Pathway	58025.1	62733.7	55992.7	42399.3	54149.3	61065.5	76732.5	67487.2	66753.8	48999.8	46085.4	39590	56647.8	53612.6	45906.5	25528.6	26291.7	23857.2	High	High	High	High	High	High	High	High	High	Peak Found
High	P05187	alkaline phosphatase, placental type [OS=Homo sapiens]	2	1	4	1	535	57.9	6.29	8.07	metabolic process	cell surface;membrane	catalytic activity;metal ion binding;protein binding	Pf00245	250	ENSG00000163283.6	ALPP	2	Folate biosynthesis; Thiamine metabolism; Metabolic pathways	Intra-Golgi traffic		3812.16	9926.8	10026.6	4961.2	10098.6	9366.1	7829.83	11892.5	12052.9	3927.42	6108.17	6970.88	3241.68	9950.09	9552.91	3436.75	4113.26	2648.74	Not Found	Peak Found	Peak Found	Peak Found	High	High	Peak Found	High	High	Not Found
High	Q9C0J8	pre-mRNA 3' end processing protein WDR33 [OS=Homo sapiens]	1	1	1	1	1336	145.8	9.17	2.68	metabolic process;response to stimulus;transport	nucleus	protein binding;RNA binding	Pf00400	55339	ENSG00000136709.11	WDR33	2	mRNA surveillance pathway	mRNA 3'-end processing; Transport of Mature mRNA Derived from an Intronless Transcript; mRNA Splicing - Major Pathway; Cleavage of Growing Transcript in the Termination Region ; Processing of Intronless Pre-mRNAs		2560.53	1963.53	3807.74	2311.22	1789.48	2396.58	3609.97	3034.6	3537.02	3141.48	4413.03	3305.57	2658.15	3431.15	9098.71	1938.97	2149.7	1898.15	Not Found	Not Found	Not Found	Not Found	Peak Found	Peak Found	Not Found	Not Found	Not Found	Not Found
High	O00622	Protein CYR61 [OS=Homo sapiens]	5	2	24	2	381	42	8.21	66.81	cell communication;cell death;cell differentiation;cell organization and biogenesis;cell proliferation;cellular component movement;metabolic process;regulation of biological process;response to stimulus	extracellular;organelle lumen	nucleotide binding;protein binding	Pf00007, Pf00090, Pf00093, Pf00219	3491	ENSG00000142871.16	CYR61	1		Post-translational protein phosphorylation; Regulation of Insulin-like Growth Factor (IGF) transport and uptake by Insulin-like Growth Factor Binding Proteins (IGFBPs)	Oncostatin M Signaling Pathway; Hypertrophy Model	43350.8	45229.9	52687.1	49581.9	62670.6	71943.6	99264.1	84504.2	101048	36460	38109.8	41222	69444.8	58168	45141.3	15785.3	34514.5	22681.3	Peak Found	Peak Found	High	High	High	High	High	High	High	High
High	P19338	Nucleolin [OS=Homo sapiens]	3	2	3	2	710	76.6	4.7	5.26	regulation of biological process;response to stimulus	cytoplasm;membrane;nucleus	DNA binding;protein binding;RNA binding	Pf00076, Pf13893, Pf14259	4691	ENSG00000115053.15	NCL	2	Pathogenic Escherichia coli infection	Major pathway of rRNA processing in the nucleolus and cytosol	Pathogenic Escherichia coli infection; VEGFA-VEGFR2 Signaling Pathway	2794.43	3247.28	4141.56	4003.97	2945.02	4910.31	4266.16	4128.66	2579.25	3329.7	4300.25	2366.31	3551.6	7985.39	2703.2	1990.18	2612.66	1930.24	Not Found	Not Found	Not Found	Not Found	High	High	Not Found	Peak Found	High	Not Found
High	P63104-1	14-3-3 protein zeta/delta [OS=Homo sapiens]	16	4	15	2	245	27.7	4.79	28.54	cell organization and biogenesis;metabolic process;regulation of biological process;response to stimulus;transport	cytoplasm;cytosol;membrane;mitochondrion;nucleus	catalytic activity;protein binding;RNA binding	Pf00244	7534	ENSG00000164924.17	YWHAZ	8	Viral carcinogenesis; Pathogenic Escherichia coli infection; Hepatitis B; Epstein-Barr virus infection; Hippo signaling pathway; Oocyte meiosis; Cell cycle; PI3K-Akt signaling pathway	Chk1/Chk2(Cds1) mediated inactivation of Cyclin B:Cdk1 complex; Interleukin-3, 5 and GM-CSF signaling; KSRP (KHSRP) binds and destabilizes mRNA; Activation of BAD and translocation to mitochondria ; GP1b-IX-V activation signalling; Translocation of GLUT4 to the plasma membrane; Rap1 signalling; Deactivation of the beta-catenin transactivating complex; TP53 Regulates Metabolic Genes; RHO GTPases a…	Cell Cycle; Prolactin Signaling Pathway; Pathogenic Escherichia coli infection; Myometrial Relaxation and Contraction Pathways; Calcium Regulation in the Cardiac Cell; Sudden Infant Death Syndrome (SIDS) Susceptibility Pathways	10154.5	36737.6	42895.4	21422.7	35739.9	60055.4	19564.1	42166.5	35778.7	16928.8	32719.6	27866.6	21774.6	42204	45759.6	13980.2	16657.5	27044.3	Not Found	Peak Found	High	High	High	High	Peak Found	High	High	Peak Found
High	P30101	Protein disulfide-isomerase A3 [OS=Homo sapiens]	12	6	41	6	505	56.7	6.35	71.46	cellular homeostasis;metabolic process;regulation of biological process;response to stimulus;transport	cell surface;endoplasmic reticulum;membrane;nucleus;organelle lumen	catalytic activity;protein binding;RNA binding	Pf00085, Pf13098, Pf13848, Pf13899, Pf13905	2923	ENSG00000167004.12	PDIA3	15	Protein processing in endoplasmic reticulum; Antigen processing and presentation	ER-Phagosome pathway; Calnexin/calreticulin cycle; Antigen Presentation: Folding, assembly and peptide loading of class I MHC		11876.6	25197.9	27737.7	27811.1	42510.2	51131.5	41706.1	45178.2	46186	32244.2	35249.7	32028.8	11787.6	32029.2	22098.2	11796.6	19822.4	21896.7	High	High	High	High	High	High	High	High	High	High
High	Q16777	Histone H2A type 2-C [OS=Homo sapiens]	33	5	73	5	129	14	10.9	168.75	regulation of biological process	chromosome;nucleus	DNA binding;protein binding	Pf00125, Pf00808	8338	ENSG00000184260.5	HIST2H2AC	1	Systemic lupus erythematosus; Alcoholism	SIRT1 negatively regulates rRNA expression; UCH proteinases; RMTs methylate histone arginines; Activation of anterior HOX genes in hindbrain development during early embryogenesis; NoRC negatively regulates rRNA expression; Meiotic synapsis; Transcriptional regulation by small RNAs; Meiotic recombination; PRC2 methylates histones and DNA; HDACs deacetylate histones; Formation of the beta-catenin:…		26112.9	25717	23593.7	49021.3	51082.6	62213.1	53099.5	55903	66356.2	45185.7	47218.5	44349.4	36976.4	33846.3	19909.6	28391.3	30185.4	21478.8	High	High	High	High	High	High	High	High	High	High
High	P62906	60S ribosomal protein L10A [OS=Homo sapiens]	5	1	1	1	217	24.8	9.94	2.03	cell organization and biogenesis;metabolic process;response to stimulus;transport	cytosol;membrane;nucleus;ribosome	protein binding;RNA binding;structural molecule activity	Pf00687	4736	ENSG00000198755.10	RPL10A	6	Ribosome	Peptide chain elongation; Eukaryotic Translation Termination; Viral mRNA Translation; L13a-mediated translational silencing of Ceruloplasmin expression; Nonsense Mediated Decay (NMD) independent of the Exon Junction Complex (EJC); Selenocysteine synthesis; Nonsense Mediated Decay (NMD) enhanced by the Exon Junction Complex (EJC); GTP hydrolysis and joining of the 60S ribosomal subunit; Major path…	Cytoplasmic Ribosomal Proteins	1757.72	9003.31	9841.86	4208.71	4974.47	5316.5	4215.7	6571.88	5036.36	3608.29	4234.56	2020.58	1971.23	4252.5	8435.21	8944.91	2286.92	2209.25	Not Found	Peak Found	Peak Found	Peak Found	Peak Found	High	Not Found	Peak Found	Peak Found	Not Found
High	P31947-1	14-3-3 protein sigma [OS=Homo sapiens]	13	3	7	1	248	27.8	4.74	9.2	cell differentiation;cell organization and biogenesis;regulation of biological process;response to stimulus	cytoplasm;cytosol;extracellular;membrane;mitochondrion;nucleus	enzyme regulator activity;protein binding	Pf00244	2810	ENSG00000175793.11	SFN	1	Aldosterone-regulated sodium reabsorption; p53 signaling pathway; Cell cycle	Translocation of GLUT4 to the plasma membrane; Chk1/Chk2(Cds1) mediated inactivation of Cyclin B:Cdk1 complex; TP53 Regulates Transcription of Genes Involved in G2 Cell Cycle Arrest; TP53 Regulates Metabolic Genes; Activation of BAD and translocation to mitochondria ; RHO GTPases activate PKNs	miRNA Regulation of DNA Damage Response; Myometrial Relaxation and Contraction Pathways; Calcium Regulation in the Cardiac Cell; DNA Damage Response	12104.9	5792.64	3925.71	3158.95	9087.97	9062.45	3187.69	5795.55	5325.51	3400.68	2829.94	4363.03	1997.09	4340.9	2082.26	2157.56	2132.57	6375.34	Peak Found	Peak Found	Not Found	Not Found	High	High	Not Found	Peak Found	Peak Found	Not Found
High	P52803	Ephrin-A5 [OS=Homo sapiens]	8	1	9	1	228	26.3	6.42	19.93	cell death;cell differentiation;cell growth;cell organization and biogenesis;cellular component movement;development;regulation of biological process;response to stimulus	membrane	enzyme regulator activity;protein binding	Pf00812	1946	ENSG00000184349.12	EFNA5	5	Rap1 signaling pathway; Ras signaling pathway; Axon guidance; PI3K-Akt signaling pathway	EPH-ephrin mediated repulsion of cells; EPHA-mediated growth cone collapse	Focal Adhesion-PI3K-Akt-mTOR-signaling pathway	8538.9	8666.41	5807.7	9375.55	16170.6	24368.4	6164.22	18141.9	18597.6	13034.7	9732.07	7052.74	6577.33	8620.13	6932.09	6665.1	5953.43	6206.01	Not Found	Not Found	Not Found	Peak Found	High	High	Not Found	High	Peak Found	Peak Found
High	P07737	profilin-1 [OS=Homo sapiens]	11	1	3	1	140	15	8.27	7.6	cell organization and biogenesis;regulation of biological process;response to stimulus	cytoplasm;cytoskeleton;cytosol;membrane;nucleus	enzyme regulator activity;nucleotide binding;protein binding;RNA binding	Pf00235	5216	ENSG00000108518.7	PFN1	17	Rap1 signaling pathway; Salmonella infection; Regulation of actin cytoskeleton; Shigellosis	Platelet degranulation ; Signaling by ROBO receptors; RHO GTPases Activate Formins; PCP/CE pathway	Association Between Physico-Chemical Features and Toxicity Associated Pathways; VEGFA-VEGFR2 Signaling Pathway; Regulation of Actin Cytoskeleton; G13 Signaling Pathway	2174.54	2807.37	2874.86	4449.82	5999.21	5720.48	5961.57	4817.9	4044.78	2617.31	3597.38	4273.07	4176.52	1752.56	1949.22	2399.51	2195.39	2419.14	Not Found	Not Found	Not Found	Peak Found	High	High	Peak Found	High	Peak Found	Not Found
High	P09758	Tumor-associated calcium signal transducer 2 [OS=Homo sapiens]	9	3	38	3	323	35.7	8.87	60.63	cell proliferation;regulation of biological process;response to stimulus	cytosol;membrane;nucleus	protein binding;receptor activity	Pf00086	4070	ENSG00000184292.6	TACSTD2	1				145503	139173	134590	70332	86083.3	101368	96262.9	84252.3	87653.9	85403.3	82342.6	91359	158654	138202	99550.6	56967	66602.2	46453.8	High	High	High	High	High	High	High	High	High	High
High	P23284	peptidyl-prolyl cis-trans isomerase B [OS=Homo sapiens]	23	4	33	4	216	23.7	9.41	34.1	metabolic process;regulation of biological process	endoplasmic reticulum;membrane;nucleus;organelle lumen	catalytic activity;protein binding;RNA binding	Pf00160	5479	ENSG00000166794.4	PPIB	15		Collagen biosynthesis and modifying enzymes	Prolactin Signaling Pathway	2811.14	2715.01	5191.49	4039.32	4148.77	5176.58	6612.77	7555.85	6770.23	4150.96	4947.79	1797.64	17684.8	4173.86	5321.78	2777.02	1869.26	3543.28	High	High	High	High	High	High	High	High	High	High
High	P27816-1	Microtubule-associated protein 4 [OS=Homo sapiens]	3	2	8	2	1152	120.9	5.43	16.6	cell division;cell organization and biogenesis;cellular component movement;regulation of biological process	cytoplasm;cytoskeleton	protein binding;RNA binding;structural molecule activity	Pf00418	4134	ENSG00000047849.21	MAP4	3				6991.7	6716.4	4611.31	9694.71	12858.4	15599.6	10754.1	13766.2	13120.6	8295.84	11831.5	7232.45	6232.42	7999.44	6906.16	4858.21	5663.02	5619.43	Not Found	Not Found	Not Found	High	High	High	Peak Found	High	High	Not Found
High	P06733-1	alpha-enolase [OS=Homo sapiens]	32	15	119	15	434	47.1	7.39	285.47	metabolic process;regulation of biological process;response to stimulus	cell surface;cytoplasm;cytosol;membrane;nucleus	catalytic activity;DNA binding;metal ion binding;protein binding;RNA binding	Pf00113, Pf03952, Pf13378	2023	ENSG00000074800.13	ENO1	1	HIF-1 signaling pathway; Carbon metabolism; Glycolysis / Gluconeogenesis; RNA degradation; Biosynthesis of amino acids; Metabolic pathways	Gluconeogenesis; Glycolysis	Glycolysis and Gluconeogenesis	131803	151207	138587	221038	365526	380753	277451	305900	330368	233658	299232	250874	192298	201335	140520	135709	170277	176564	Peak Found	High	High	High	High	High	High	High	High	High
High	P0DMV8	heat shock 70 kDa protein 1A [OS=Homo sapiens]	13	8	31	7	641	70	5.66	75.87	cell organization and biogenesis;metabolic process;regulation of biological process;response to stimulus;transport	cytoplasm;cytoskeleton;cytosol;endoplasmic reticulum;extracellular;mitochondrion;nucleus	catalytic activity;nucleotide binding;protein binding;receptor activity;RNA binding	Pf00012, Pf06723	3304; 3303	ENSG00000232804.5; ENSG00000234475.5; ENSG00000231555.4; ENSG00000235941.5; ENSG00000204389.9; ENSG00000204388.6; ENSG00000212866.6; ENSG00000237724.5; ENSG00000224501.5	HSPA1B; HSPA1A	6; CHR_HSCHR6_MHC_APD_CTG1; CHR_HSCHR6_MHC_DBB_CTG1; CHR_HSCHR6_MHC_QBL_CTG1; CHR_HSCHR6_MHC_COX_CTG1	Endocytosis; Longevity regulating pathway - multiple species; Prion diseases; Epstein-Barr virus infection; Spliceosome; MAPK signaling pathway; Protein processing in endoplasmic reticulum; Toxoplasmosis; Measles; Influenza A; Estrogen signaling pathway; Legionellosis; Antigen processing and presentation	AUF1 (hnRNP D0) binds and destabilizes mRNA; Attenuation phase; Neutrophil degranulation; Regulation of HSF1-mediated heat shock response; Viral RNP Complexes in the Host Cell Nucleus; HSP90 chaperone cycle for steroid hormone receptors (SHR)	Apoptosis Modulation and Signaling; Parkin-Ubiquitin Proteasomal System pathway; NRF2 pathway; MAPK Signaling Pathway; Apoptosis Modulation by HSP70; VEGFA-VEGFR2 Signaling Pathway	66835.1	63463.6	71333.9	78317	81649.3	97202.7	110688	87982.6	111529	77531.9	82619.5	94636.8	36197.2	70792.4	57524.5	32640.1	64251.3	56519	Not Found	Peak Found	Peak Found	High	High	High	High	High	High	High
High	Q9Y265	RuvB-like 1 [OS=Homo sapiens]	2	1	2	1	456	50.2	6.42	4.15	cell division;cell organization and biogenesis;metabolic process;regulation of biological process;response to stimulus	cytoplasm;cytoskeleton;cytosol;membrane;nucleus	catalytic activity;nucleotide binding;protein binding	Pf00004, Pf01078, Pf01695, Pf05496, Pf06068, Pf06414, Pf07726, Pf13191, Pf13238, Pf13245, Pf13481	8607	ENSG00000175792.11	RUVBL1	3	Wnt signaling pathway	Ub-specific processing proteases; UCH proteinases; DNA Damage Recognition in GG-NER; HATs acetylate histones; Formation of the beta-catenin:TCF transactivating complex; Telomere Extension By Telomerase; Deposition of new CENPA-containing nucleosomes at the centromere	Gastric Cancer Network 1	13390.5	13125	13650.7	13179.3	13329	13473.8	20978.6	12545.8	13063.9	18023.2	17488.6	17727	17185.2	18767.1	10501.7	2950.27	12421.7	14464	Peak Found	Peak Found	Peak Found	Peak Found	High	Peak Found	Peak Found	Peak Found	Peak Found	Peak Found
High	P16401	Histone H1.5 [OS=Homo sapiens]	38	10	50	4	226	22.6	10.92	116.22	cell organization and biogenesis;regulation of biological process	chromosome;nucleus	DNA binding;protein binding;RNA binding	Pf00538	3009	ENSG00000184357.4	HIST1H1B	6		Formation of Senescence-Associated Heterochromatin Foci (SAHF); Activation of DNA fragmentation factor		11546.9	11825.8	11861.6	19772.4	29269	41595.5	29585.8	38614.9	31499.5	17396.6	19135.2	15717.2	18254	20723.6	12438.2	12797.6	15110.3	11048.1	Not Found	Not Found	Not Found	Peak Found	High	High	Peak Found	High	High	Peak Found
High	P16144-1	Integrin beta-4 [OS=Homo sapiens]	1	2	6	2	1822	202	6.09	11.52	cell communication;cell differentiation;cell organization and biogenesis;cellular component movement;metabolic process;regulation of biological process;response to stimulus	cell surface;membrane;nucleus	protein binding;receptor activity	Pf00041, Pf00362, Pf03160, Pf07965, Pf07974	3691	ENSG00000132470.13	ITGB4	17	Arrhythmogenic right ventricular cardiomyopathy (ARVC); Dilated cardiomyopathy; Focal adhesion; Regulation of actin cytoskeleton; ECM-receptor interaction; PI3K-Akt signaling pathway; Hypertrophic cardiomyopathy (HCM)	Laminin interactions; Assembly of collagen fibrils and other multimeric structures; Type I hemidesmosome assembly; Syndecan interactions	Integrin-mediated Cell Adhesion; Arrhythmogenic Right Ventricular Cardiomyopathy; Alpha 6 Beta 4 signaling pathway; Primary Focal Segmental Glomerulosclerosis FSGS; Focal Adhesion; TGF-beta Signaling Pathway; Regulation of Apoptosis by Parathyroid Hormone-related Protein; Focal Adhesion-PI3K-Akt-mTOR-signaling pathway	4975.17	12578.3	14273.3	5801.14	10732.8	8540.92	6311.88	12285.8	7226.7	9069.31	16980.8	6196.23	5019.88	15958.4	10197.4	6777.57	5317.15	9536.87	Not Found	Peak Found	High	Not Found	High	High	Peak Found	High	Peak Found	Peak Found
High	O95858	Tetraspanin-15 [OS=Homo sapiens]	3	1	2	1	294	33.1	5.48	3.54	cell organization and biogenesis;metabolic process;regulation of biological process;response to stimulus	cell surface;endosome;membrane	protein binding	Pf00335	23555	ENSG00000099282.9	TSPAN15	10				3092.47	4240.09	7675.59	3903.76	3932.15	3413.09	2674.69	5258.4	3130.91	4460.42	3027.72	3795.43	2459.87	10013.9	5274.88	3583.86	2482.39	2842.67	Not Found	Not Found	Peak Found	Not Found	Peak Found	High	Not Found	High	Peak Found	Not Found
High	P07900	Heat shock protein HSP 90-alpha [OS=Homo sapiens]	21	14	86	4	732	84.6	5.02	155.34	cell organization and biogenesis;metabolic process;regulation of biological process;response to stimulus;transport	cytoplasm;cytosol;extracellular;membrane;nucleus;organelle lumen	catalytic activity;enzyme regulator activity;nucleotide binding;protein binding;RNA binding	Pf00183, Pf02518, Pf13589	3320	ENSG00000080824.18	HSP90AA1	14	NOD-like receptor signaling pathway; Progesterone-mediated oocyte maturation; Pathways in cancer; Prostate cancer; Protein processing in endoplasmic reticulum; Estrogen signaling pathway; PI3K-Akt signaling pathway; Antigen processing and presentation	Sema3A PAK dependent Axon repulsion; Regulation of PLK1 Activity at G2/M Transition; Recruitment of NuMA to mitotic centrosomes; Loss of Nlp from mitotic centrosomes; Scavenging by Class F Receptors; Neutrophil degranulation; Uptake and function of diphtheria toxin; Regulation of actin dynamics for phagocytic cup formation; The role of GTSE1 in G2/M progression after G2 checkpoint; HSP90 chaperon…	Nucleotide-binding Oligomerization Domain (NOD) pathway; TNF alpha Signaling Pathway; Corticotropin-releasing hormone signaling pathway; Aryl Hydrocarbon Receptor; EBV LMP1 signaling; Aryl Hydrocarbon Receptor Pathway; Constitutive Androstane Receptor Pathway; NRF2 pathway; VEGFA-VEGFR2 Signaling Pathway; Focal Adhesion-PI3K-Akt-mTOR-signaling pathway	12244.2	12265.8	21114.9	15610.5	28826.4	33623.5	24444.3	27465.5	29025.4	22162.7	26482.1	23074.9	28472	30444	19654.1	9001.28	26685.5	17395	Not Found	High	Peak Found	High	High	High	Peak Found	High	High	Peak Found
High	Q08174	Protocadherin-1 [OS=Homo sapiens]	4	3	9	3	1060	114.7	5.03	21.32	cell communication	membrane;nucleus	metal ion binding	Pf00028, Pf08266, Pf08374	5097	ENSG00000156453.13	PCDH1	5				4907.28	5334.78	5943.83	16101.1	17824.3	24324.4	6592.47	20449.9	18792.8	8841.54	11842.4	4819.79	5967.5	6047.22	11812.5	6684.14	6070.01	8318.88	Not Found	Not Found	Not Found	Peak Found	High	High	Not Found	High	Peak Found	Peak Found
High	P49327	Fatty acid synthase [OS=Homo sapiens]	2	4	52	4	2511	273.3	6.44	109.43	cell differentiation;metabolic process;regulation of biological process;response to stimulus	cytoplasm;cytosol;Golgi;membrane;mitochondrion	catalytic activity;nucleotide binding;protein binding;RNA binding	Pf00106, Pf00107, Pf00108, Pf00109, Pf00698, Pf00975, Pf02801, Pf08242, Pf08659, Pf13602, Pf14765	2194	ENSG00000169710.8	FASN	17	Insulin signaling pathway; Fatty acid biosynthesis; AMPK signaling pathway; Metabolic pathways; Fatty acid metabolism	ChREBP activates metabolic gene expression; Fatty acyl-CoA biosynthesis; Vitamin B5 (pantothenate) metabolism; Activation of gene expression by SREBF (SREBP)	AMP-activated Protein Kinase (AMPK) Signaling; Sterol Regulatory Element-Binding Proteins (SREBP) signalling; SREBF and miR33 in cholesterol and lipid homeostasis; Liver X Receptor Pathway; Fatty Acid Biosynthesis; Angiopoietin Like Protein 8 Regulatory Pathway	7382.34	5941.85	5275.82	10839	10237.3	10723.5	9331.34	8008.04	7520.79	6501.8	10801.8	6342.3	5074.77	7566.79	6204.2	6236.15	5107.69	3584.69	High	High	High	High	High	High	High	High	High	High
High	P17936	Insulin-like growth factor-binding protein 3 [OS=Homo sapiens]	9	2	22	2	291	31.7	8.69	46.71	cell death;cell differentiation;cell proliferation;metabolic process;regulation of biological process	extracellular;nucleus;organelle lumen	enzyme regulator activity;metal ion binding;protein binding	Pf00086, Pf00219	3486	ENSG00000146674.14	IGFBP3	7	Transcriptional misregulation in cancer; p53 signaling pathway	TP53 Regulates Transcription of Death Receptors and Ligands; Post-translational protein phosphorylation; Regulation of Insulin-like Growth Factor (IGF) transport and uptake by Insulin-like Growth Factor Binding Proteins (IGFBPs)	Myometrial Relaxation and Contraction Pathways; Photodynamic therapy-induced HIF-1 survival signaling; Senescence and Autophagy in Cancer	41124.6	38512.7	66943	54481.5	94617.8	102905	29074	104275	74390.8	43116.1	52925.7	44595.6	50920.7	55338.1	46760.4	30279.2	63598.2	35093	Peak Found	Peak Found	High	Peak Found	High	High	Peak Found	High	High	High
High	P51991-1	Heterogeneous nuclear ribonucleoprotein A3 [OS=Homo sapiens]	4	1	1	1	378	39.6	9.01	2.64	metabolic process;transport	cytoplasm;nucleus;spliceosomal complex	protein binding;RNA binding;transporter activity	Pf00076, Pf13893, Pf14259	220988	ENSG00000170144.20	HNRNPA3	2	Spliceosome	mRNA Splicing - Major Pathway		1821.12	4322.65	5844.86	2523.39	9366.06	10412.7	3334.27	9183.68	6019.95	2020.65	4947.7	5451.4	4204.67	4065.29	2986.78	3919.43	2358.43	7685.53	Not Found	Not Found	Peak Found	Not Found	Peak Found	Peak Found	Not Found	High	Peak Found	Not Found
High	P16070	CD44 antigen [OS=Homo sapiens]	1	1	19	1	742	81.5	5.33	16.8	cell organization and biogenesis;cellular component movement;metabolic process;regulation of biological process;response to stimulus;transport	cell surface;cytosol;Golgi;membrane	protein binding;receptor activity;signal transducer activity	Pf00193	960	ENSG00000026508.17	CD44	11	Hematopoietic cell lineage; MicroRNAs in cancer; Epstein-Barr virus infection; Proteoglycans in cancer; ECM-receptor interaction; Shigellosis	Integrin cell surface interactions; Degradation of the extracellular matrix; Neutrophil degranulation; Hyaluronan uptake and degradation; Interferon gamma signaling; Cell surface interactions at the vascular wall	Hepatitis C and Hepatocellular Carcinoma; Wnt Signaling Pathway and Pluripotency; Senescence and Autophagy in Cancer	47821.3	41670.1	38481.5	30457.7	31787.8	49169.9	42819.1	44928.3	44296.2	26763.1	26231.8	25712.7	69568.2	50992.8	37046.4	13403.4	21400.1	22033.7	Peak Found	High	High	High	High	High	Peak Found	High	High	Peak Found
High	P23246-1	splicing factor, proline- and glutamine-rich [OS=Homo sapiens]	2	1	4	1	707	76.1	9.44	9.31	cell organization and biogenesis;defense response;metabolic process;regulation of biological process;response to stimulus	chromosome;cytoplasm;nucleus	DNA binding;protein binding;RNA binding	Pf00076, Pf08075, Pf13893, Pf14259	6421	ENSG00000116560.10	SFPQ	1		PTK6 Regulates Proteins Involved in RNA Processing	mRNA Processing	2778.98	3346.07	2957.23	1975.27	4294.64	5608.53	4005.17	4873.79	3450.9	3155.24	3066.25	3363.03	4267.24	3257.03	17822.3	2638.54	7272.35	2519.18	Not Found	Not Found	Not Found	Not Found	Peak Found	High	Not Found	High	Not Found	Not Found
High	P00338-1	L-lactate dehydrogenase A chain [OS=Homo sapiens]	6	2	2	2	332	36.7	8.27	4.6	metabolic process;regulation of biological process;response to stimulus	cytoplasm;cytosol;membrane;nucleus	catalytic activity;nucleotide binding;protein binding	Pf00056, Pf02866	3939	ENSG00000134333.13	LDHA	11	Propanoate metabolism; HIF-1 signaling pathway; Central carbon metabolism in cancer; Pyruvate metabolism; Glucagon signaling pathway; Glycolysis / Gluconeogenesis; Metabolic pathways; Cysteine and methionine metabolism	Pyruvate metabolism	Cori Cycle; Photodynamic therapy-induced HIF-1 survival signaling; Amino Acid metabolism; Glycolysis and Gluconeogenesis	3830.3	6322.35	13786.4	9358.18	17533.2	17865.8	12044.9	17030.1	18750.7	6734.02	14319.2	11495.1	5969.22	16953.8	9710.96	4715.73	9619.93	11822	Not Found	Not Found	Peak Found	Peak Found	High	Peak Found	Peak Found	Peak Found	Peak Found	Not Found
High	Q6H3X3	UL-16 binding protein 5 [OS=Homo sapiens]	6	1	4	1	334	37.1	7.3	11.76	defense response;metabolic process;response to stimulus	endoplasmic reticulum;extracellular;membrane	protein binding	Pf00129, Pf14586	353091	ENSG00000203722.7	RAET1G	6	Natural killer cell mediated cytotoxicity	Post-translational modification: synthesis of GPI-anchored proteins		3644.73	2014.29	3563.54	2979.07	6385.15	7128.3	1983.63	6326.05	8473.4	1965.31	3718.99	2898.26	3257.02	3005.54	2527.97	2380.36	2970.02	2428.38	Not Found	Not Found	Not Found	Not Found	High	High	Not Found	High	High	Not Found
High	P22626	heterogeneous nuclear ribonucleoproteins A2/B1 [OS=Homo sapiens]	13	3	8	3	353	37.4	8.95	6.93	metabolic process;regulation of biological process;response to stimulus;transport	cytoplasm;extracellular;membrane;nucleus;spliceosomal complex	DNA binding;protein binding;RNA binding	Pf00076, Pf13893, Pf14259	3181	ENSG00000122566.20	HNRNPA2B1	7		Gene and protein expression by JAK-STAT signaling after Interleukin-12 stimulation; Interleukin-12 family signaling; mRNA Splicing - Major Pathway	mRNA Processing	7830.8	7484.81	4603.29	11154.3	9683.5	10628.2	9200.52	10551.2	12411	9253.18	6615.4	5041.53	5850.3	4110.55	6605.03	5545.65	4171.65	8364.99	Peak Found	Peak Found	High	Peak Found	High	Peak Found	Peak Found	High	High	Peak Found
High	P59998	Actin-related protein 2/3 complex subunit 4 [OS=Homo sapiens]	8	1	1	1	168	19.7	8.43	1.73	cell organization and biogenesis;regulation of biological process;response to stimulus	cytoplasm;cytoskeleton;cytosol	protein binding;structural molecule activity	Pf05856	10093	ENSG00000241553.12	ARPC4	3	Endocytosis; Pathogenic Escherichia coli infection; Salmonella infection; Regulation of actin cytoskeleton; Bacterial invasion of epithelial cells; Fc gamma R-mediated phagocytosis; Shigellosis	EPHB-mediated forward signaling; Clathrin-mediated endocytosis; RHO GTPases Activate WASPs and WAVEs; Regulation of actin dynamics for phagocytic cup formation	Pathogenic Escherichia coli infection	2479.75	4324.57	4316.25	4299.29	2573.35	1944.1	1992.95	3541.87	2548.13	2313.16	3754.12	2673.76	2373.69	2113.24	1987.89	2688.89	2253.49	2245.63	Not Found	Not Found	Not Found	Not Found	High	Not Found	Not Found	Not Found	Not Found	Not Found
High	Q6IA69	glutamine-dependent NAD(+) synthetase [OS=Homo sapiens]	3	1	18	1	706	79.2	6.44	49.76	metabolic process	cytoplasm;cytosol	catalytic activity;nucleotide binding;protein binding	Pf00795, Pf02540	55191	ENSG00000172890.11	NADSYN1	11	Nicotinate and nicotinamide metabolism; Metabolic pathways	Nicotinate metabolism	NAD Biosynthesis II (from tryptophan); NAD+ biosynthetic pathways	8185.99	21668.5	25233	12336.4	10958.3	12250.9	18365.7	17155.5	14648	11376.3	10732.7	8779.22	62383	46401.9	32943.8	5363.35	25819.6	9058.36	Not Found	High	High	High	Peak Found	High	High	High	Peak Found	High
High	P09429	High mobility group protein B1 [OS=Homo sapiens]	13	2	9	2	215	24.9	5.74	22.64	cell differentiation;cell organization and biogenesis;cell proliferation;cellular component movement;cellular homeostasis;defense response;metabolic process;regulation of biological process;response to stimulus;transport	cell surface;chromosome;cytoplasm;endosome;extracellular;membrane;nucleus;organelle lumen	catalytic activity;DNA binding;enzyme regulator activity;protein binding;RNA binding	Pf00505, Pf09011	3146	ENSG00000189403.14	HMGB1	13	Base excision repair	TRAF6 mediated NF-kB activation; Advanced glycosylation endproduct receptor signaling; TAK1 activates NFkB by phosphorylation and activation of IKKs complex; RIP-mediated NFkB activation via ZBP1; Activated TLR4 signalling; Interleukin-1 family signaling; Neutrophil degranulation; Regulation of TLR by endogenous ligand; DEx/H-box helicases activate type I IFN and inflammatory cytokines production…	Retinoblastoma (RB) in Cancer; DNA Damage Response (only ATM dependent)	1812.96	2488.04	2622.35	1851.68	8263.87	7891.5	2054.95	7630.9	8072.05	1785.22	3984	3475.85	1830.96	2670.28	2124.64	4233.95	1935.53	2987	Not Found	Not Found	High	Not Found	High	Peak Found	Not Found	High	High	Not Found
High	P12236	ADP/ATP translocase 3 [OS=Homo sapiens]	15	4	39	4	298	32.8	9.74	74.05	cell death;cell organization and biogenesis;regulation of biological process;response to stimulus;transport	membrane;mitochondrion;nucleus	protein binding;transporter activity	Pf00153	293	ENSG00000169100.13	SLC25A6	X|Y; X	cGMP-PKG signaling pathway; Huntington's disease; HTLV-I infection; Parkinson's disease; Influenza A; Calcium signaling pathway	Mitochondrial protein import; Regulation of insulin secretion; Vpr-mediated induction of apoptosis by mitochondrial outer membrane permeabilization; Influenza Virus Induced Apoptosis; Metabolism of proteins	Electron Transport Chain	2482.58	10731.9	7461.11	8057.08	7743.92	7388.72	6600.18	7725.86	6462.7	4138.51	3951.5	2826.07	3557.23	1763.16	13740.1	2808.92	3400.16	7068.13	High	High	High	High	High	High	Peak Found	High	High	Peak Found
High	P08238	Heat shock protein HSP 90-beta [OS=Homo sapiens]	24	16	93	6	724	83.2	5.03	174.73	cell organization and biogenesis;metabolic process;regulation of biological process;response to stimulus;transport	cell surface;cytoplasm;cytosol;extracellular;membrane;mitochondrion;nucleus;organelle lumen	enzyme regulator activity;nucleotide binding;protein binding;RNA binding	Pf00183, Pf02518, Pf13589	3326	ENSG00000096384.19	HSP90AB1	6	NOD-like receptor signaling pathway; Progesterone-mediated oocyte maturation; Pathways in cancer; Prostate cancer; Protein processing in endoplasmic reticulum; Estrogen signaling pathway; PI3K-Akt signaling pathway; Antigen processing and presentation	Sema3A PAK dependent Axon repulsion; HSF1 activation; Attenuation phase; Neutrophil degranulation; Aryl hydrocarbon receptor signalling; Uptake and function of diphtheria toxin; Regulation of actin dynamics for phagocytic cup formation; The NLRP3 inflammasome; HSP90 chaperone cycle for steroid hormone receptors (SHR); The role of GTSE1 in G2/M progression after G2 checkpoint	NRF2 pathway; Focal Adhesion-PI3K-Akt-mTOR-signaling pathway	207983	220220	198760	230305	258811	267239	287840	262893	278490	275054	244270	231925	298982	299593	244073	197486	264299	211896	Peak Found	Peak Found	Peak Found	High	High	High	Peak Found	High	High	High
High	P27797	Calreticulin [OS=Homo sapiens]	13	5	34	5	417	48.1	4.44	74.6	cell differentiation;cell organization and biogenesis;cellular homeostasis;metabolic process;regulation of biological process;response to stimulus;transport	cell surface;cytoplasm;cytosol;endoplasmic reticulum;extracellular;Golgi;membrane;nucleus;organelle lumen	DNA binding;metal ion binding;protein binding;RNA binding	Pf00262	811	ENSG00000179218.13	CALR	19	Chagas disease (American trypanosomiasis); Protein processing in endoplasmic reticulum; HTLV-I infection; Phagosome; Antigen processing and presentation	Scavenging by Class F Receptors; Assembly of Viral Components at the Budding Site; ATF6 (ATF6-alpha) activates chaperone genes; Antigen Presentation: Folding, assembly and peptide loading of class I MHC; ER-Phagosome pathway; Calnexin/calreticulin cycle; Scavenging by Class A Receptors	Androgen receptor signaling pathway; Photodynamic therapy-induced unfolded protein response; Calcium Regulation in the Cardiac Cell	3973.75	7847.31	6150.6	4909.4	9697.77	10270.7	5950.44	9806.1	11594	7367.59	7939.12	7060.15	7441.71	10826.4	5998.75	8541.88	5116.89	6439.97	High	High	High	High	High	High	High	High	Peak Found	High
High	Q06830	peroxiredoxin-1 [OS=Homo sapiens]	22	4	19	4	199	22.1	8.13	36.99	cell proliferation;cellular homeostasis;defense response;metabolic process;regulation of biological process;response to stimulus	cytoplasm;cytosol;mitochondrion;nucleus	antioxidant activity;catalytic activity;protein binding;RNA binding	Pf00578, Pf08534, Pf10417	5052	ENSG00000117450.13	PRDX1	1	Peroxisome	TP53 Regulates Metabolic Genes; Deregulated CDK5 triggers multiple neurodegenerative pathways in Alzheimer's disease models; Detoxification of Reactive Oxygen Species	Androgen receptor signaling pathway; Selenium Micronutrient Network; NRF2 pathway	15155.8	22491.1	31025.2	32827.6	34812	42273.9	33933.7	37932.6	39746.3	28265	32794.2	27918.4	38510.6	45617.9	31199.3	21423.7	24728.6	25182.2	Not Found	Peak Found	Peak Found	High	High	High	Peak Found	High	High	Peak Found
High	P14618	Pyruvate kinase PKM [OS=Homo sapiens]	16	6	38	6	531	57.9	7.84	69.53	cell death;cell organization and biogenesis;metabolic process;response to stimulus;transport	cytoplasm;cytosol;extracellular;mitochondrion;nucleus;organelle lumen	catalytic activity;metal ion binding;nucleotide binding;protein binding;RNA binding	Pf00224, Pf02887	5315	ENSG00000067225.17	PKM	15	Viral carcinogenesis; Central carbon metabolism in cancer; Carbon metabolism; Purine metabolism; Pyruvate metabolism; Type II diabetes mellitus; Glucagon signaling pathway; Glycolysis / Gluconeogenesis; Biosynthesis of amino acids; Metabolic pathways	Glycolysis; Neutrophil degranulation	Photodynamic therapy-induced HIF-1 survival signaling; Amino Acid metabolism; Glycolysis and Gluconeogenesis	29392.5	37402.1	40016.4	46198.6	49767.7	54121	61382.5	47336.8	57060.7	45664	44811	40514.4	65064.4	72940.6	41885.3	36017.9	40624	39613.3	Peak Found	Peak Found	Peak Found	High	High	High	High	High	High	High
High	P68363	Tubulin alpha-1B chain [OS=Homo sapiens]	17	6	67	6	451	50.1	5.06	141.43	cell division;cell organization and biogenesis;response to stimulus;transport	cytoplasm;cytoskeleton;membrane	catalytic activity;nucleotide binding;protein binding;RNA binding;structural molecule activity	Pf00091, Pf03953	10376	ENSG00000123416.15	TUBA1B	12	Pathogenic Escherichia coli infection; Gap junction; Phagosome; Apoptosis	COPI-independent Golgi-to-ER retrograde traffic; COPI-dependent Golgi-to-ER retrograde traffic; Carboxyterminal post-translational modifications of tubulin; Recruitment of NuMA to mitotic centrosomes; Hedgehog 'off' state; Translocation of GLUT4 to the plasma membrane; Microtubule-dependent trafficking of connexons from Golgi to the plasma membrane; Separation of Sister Chromatids; COPI-mediated …	Pathogenic Escherichia coli infection; Allograft Rejection; Parkin-Ubiquitin Proteasomal System pathway	51874.6	52694.1	48927.5	45209.1	49903.9	49319.5	61057.9	45776.5	42319.5	24138.8	29935.6	30310.9	70899.8	44302.8	47262.8	12890.9	36351.3	26826.1	High	High	High	High	High	High	High	High	High	High
High	P02533	Keratin, type I cytoskeletal 14 [OS=Homo sapiens]	6	3	14	2	472	51.5	5.16	30.36	cell death;cell differentiation;cell organization and biogenesis;response to stimulus	cytoplasm;cytosol;nucleus	protein binding;structural molecule activity	Pf00038, Pf13514	3861	ENSG00000186847.5	KRT14	17		Formation of the cornified envelope; Type I hemidesmosome assembly	Corticotropin-releasing hormone signaling pathway	6831.72	4685.61	6406.02	5192.55	9420.58	10086	7145.04	8508.7	8587.21	6449.35	7535.31	5488.03	5184.38	8165.08	5425.98	6930.35	5233.56	5919.7	Not Found	Not Found	Not Found	Not Found	High	High	Not Found	High	High	Peak Found
High	P14625	Endoplasmin [OS=Homo sapiens]	7	6	40	6	803	92.4	4.84	92.64	cell organization and biogenesis;metabolic process;regulation of biological process;response to stimulus;transport	cytosol;endoplasmic reticulum;extracellular;membrane;nucleus;organelle lumen	metal ion binding;nucleotide binding;protein binding;RNA binding	Pf00183, Pf02518, Pf13589	7184	ENSG00000166598.14	HSP90B1	12	Pathways in cancer; Prostate cancer; Protein processing in endoplasmic reticulum; Thyroid hormone synthesis; Estrogen signaling pathway; PI3K-Akt signaling pathway	Post-translational protein phosphorylation; Regulation of Insulin-like Growth Factor (IGF) transport and uptake by Insulin-like Growth Factor Binding Proteins (IGFBPs); ATF6 (ATF6-alpha) activates chaperone genes; Interleukin-4 and 13 signaling; Trafficking and processing of endosomal TLR; Scavenging by Class A Receptors	Photodynamic therapy-induced unfolded protein response; Focal Adhesion-PI3K-Akt-mTOR-signaling pathway; Sudden Infant Death Syndrome (SIDS) Susceptibility Pathways	7127.89	13415.4	7123.54	20311.3	31326.8	39451.8	21942.3	35407.1	31390.4	29015.8	25620.6	25597.1	5492.48	33561.5	27208.1	21635.5	29947.9	23565.6	Peak Found	High	High	High	High	High	Peak Found	High	High	High
High	P13645	Keratin, type I cytoskeletal 10 [OS=Homo sapiens]	9	4	14	3	584	58.8	5.21	29.89	cell death;cell differentiation;metabolic process	cytoplasm;cytoskeleton;cytosol;membrane;nucleus	structural molecule activity	Pf00038, Pf04111	3858	ENSG00000186395.7	KRT10	17	Staphylococcus aureus infection	Formation of the cornified envelope		3146.82	6296.8	5624.01	9834.41	12211.1	15585.6	10170.3	11733	15861.4	9786.07	8434.92	5712.65	10306.5	15658.5	5742.47	2873.72	9691.79	7805.88	Peak Found	High	Peak Found	Peak Found	Peak Found	Peak Found	Peak Found	Peak Found	Peak Found	Peak Found
High	Q15582	Transforming growth factor-beta-induced protein ig-h3 [OS=Homo sapiens]	2	1	8	1	683	74.6	7.71	12.65	cell differentiation;cell organization and biogenesis;cell proliferation;metabolic process;regulation of biological process;response to stimulus	extracellular;membrane	protein binding	Pf02469, Pf07546	7045	ENSG00000120708.16	TGFBI	5		Amyloid fiber formation		11327.9	7693.46	8218.47	7383.63	8444.25	10919.8	8373.24	10190.4	10148.4	7284.38	6327.46	7881.65	13613.8	14571	10957.4	3378.96	6845.1	6950.41	Peak Found	Peak Found	Peak Found	Peak Found	High	High	High	High	High	Peak Found
High	Q07020	60S ribosomal protein L18 [OS=Homo sapiens]	6	1	3	1	188	21.6	11.72	4.86	cell organization and biogenesis;metabolic process;transport	cytoplasm;cytosol;endoplasmic reticulum;membrane;nucleus;ribosome	RNA binding;structural molecule activity	Pf00828	6141	ENSG00000063177.12	RPL18	19	Ribosome	Peptide chain elongation; Eukaryotic Translation Termination; Viral mRNA Translation; L13a-mediated translational silencing of Ceruloplasmin expression; Nonsense Mediated Decay (NMD) independent of the Exon Junction Complex (EJC); Selenocysteine synthesis; Nonsense Mediated Decay (NMD) enhanced by the Exon Junction Complex (EJC); GTP hydrolysis and joining of the 60S ribosomal subunit; Major path…	Cytoplasmic Ribosomal Proteins	2670.21	3451.91	5311.43	2307.04	3924.13	2374.13	3646.59	4754.12	4811.9	3841.56	3930.84	4047.96	13360.8	2662.1	5243.08	3695.2	2232.79	4011.59	Not Found	Not Found	Peak Found	Not Found	High	Not Found	High	High	Peak Found	Not Found
High	P07355	Annexin A2 [OS=Homo sapiens]	7	2	5	2	339	38.6	7.75	12.08	cell organization and biogenesis;metabolic process;regulation of biological process;response to stimulus;transport	cell surface;cytoplasm;cytosol;endoplasmic reticulum;endosome;extracellular;membrane;nucleus;organelle lumen	enzyme regulator activity;metal ion binding;protein binding;RNA binding	Pf00191	302	ENSG00000182718.16	ANXA2	15		Dissolution of Fibrin Clot; Gene and protein expression by JAK-STAT signaling after Interleukin-12 stimulation; Smooth Muscle Contraction; Neutrophil degranulation; Interleukin-12 family signaling	Prostaglandin Synthesis and Regulation	2594.91	7052.63	8528.41	6715.89	11185.9	12400	10315.1	7344.29	10266.3	2078.84	4599.99	2269.82	3772.41	8750.48	5677.99	2040.38	2143.4	2997.47	Not Found	High	Peak Found	Peak Found	High	Peak Found	Peak Found	Peak Found	High	Not Found
High	P07237	Protein disulfide-isomerase [OS=Homo sapiens]	3	1	1	1	508	57.1	4.87	2.13	cell organization and biogenesis;cellular homeostasis;metabolic process;regulation of biological process;response to stimulus	endoplasmic reticulum;extracellular;membrane;organelle lumen	catalytic activity;metal ion binding;protein binding;RNA binding	Pf00085, Pf01216, Pf13098, Pf13848, Pf13899, Pf13905	5034	ENSG00000185624.14	P4HB	17	Protein processing in endoplasmic reticulum	Post-translational protein phosphorylation; Regulation of Insulin-like Growth Factor (IGF) transport and uptake by Insulin-like Growth Factor Binding Proteins (IGFBPs); VLDL assembly; Chylomicron assembly; Collagen biosynthesis and modifying enzymes; Interleukin-12 family signaling; Detoxification of Reactive Oxygen Species; Hedgehog ligand biogenesis		3100.37	2397.84	4316.39	1978.21	3360.44	3506.64	2743.94	2748.29	2544.74	1928.76	3499.82	2701.25	3662.86	4244.33	1928.87	2539.91	4267.95	2584.19	Not Found	Not Found	Not Found	Not Found	Not Found	High	Not Found	Not Found	Peak Found	Not Found
High	P13647	keratin, type II cytoskeletal 5 [OS=Homo sapiens]	17	10	65	5	590	62.3	7.74	136.29	cell death;cell organization and biogenesis;metabolic process	cytoplasm;cytosol;membrane;mitochondrion;nucleus	catalytic activity;motor activity;protein binding;structural molecule activity	Pf00038, Pf01576, Pf02994, Pf03961, Pf04111, Pf05957, Pf12128	3852	ENSG00000186081.11	KRT5	12		Formation of the cornified envelope; Type I hemidesmosome assembly		9030.53	33701.8	34410.5	15005.1	37104.4	43639.5	20238.8	44897.1	44227.4	11054.2	21307.1	11599.3	15601.6	13581.3	29969.7	9412.64	13060.1	11179.4	High	High	High	Peak Found	High	High	Peak Found	High	High	High
High	P05787	Keratin, type II cytoskeletal 8 [OS=Homo sapiens]	5	3	26	1	483	53.7	5.59	67.92	cell death;cell differentiation;cell organization and biogenesis;regulation of biological process;response to stimulus	cytoplasm;cytoskeleton;cytosol;membrane;nucleus	catalytic activity;motor activity;protein binding;structural molecule activity	Pf00038, Pf01576, Pf13166, Pf15003	3856	ENSG00000170421.12	KRT8	12		Formation of the cornified envelope	Primary Focal Segmental Glomerulosclerosis FSGS	4018.66	2801.57	2291.2	2998.98	5055.65	4375.84	3454.39	4310.66	4903.81	2125.15	2675.07	3942.31	3705.12	4087.39	3481.38	4145.09	2170.18	2584.9	Not Found	Not Found	Not Found	Not Found	High	High	Not Found	High	Peak Found	Not Found
High	P21333	Filamin-A [OS=Homo sapiens]	1	3	29	2	2647	280.6	6.06	90.02	cell organization and biogenesis;cellular component movement;metabolic process;regulation of biological process;response to stimulus;transport	cytoplasm;cytoskeleton;cytosol;extracellular;membrane;nucleus	protein binding;RNA binding;signal transducer activity	Pf00307, Pf00630	2316	ENSG00000196924.14	FLNA	X	MAPK signaling pathway; Focal adhesion; Proteoglycans in cancer; Salmonella infection	Platelet degranulation ; RHO GTPases activate PAKs; Cell-extracellular matrix interactions; GP1b-IX-V activation signalling	Androgen receptor signaling pathway; Prolactin Signaling Pathway; Focal Adhesion; Hypothesized Pathways in Pathogenesis of Cardiovascular Disease; MAPK Signaling Pathway; IL-4 Signaling Pathway	26337.6	40114.9	28396.1	33595	34529	45939.3	38426.8	37822.4	38597.1	49827.8	50647.9	33167.5	64182.4	65279.3	42938.4	32974.1	58484	49080.7	Peak Found	High	High	High	High	High	High	High	High	High
High	P83731	60S ribosomal protein L24 [OS=Homo sapiens]	11	2	5	2	157	17.8	11.25	10.51	cell organization and biogenesis;cellular component movement;metabolic process;regulation of biological process;transport	cytoplasm;cytosol;membrane;ribosome	protein binding;RNA binding;structural molecule activity	Pf01246	6152	ENSG00000114391.12	RPL24	3	Ribosome	Peptide chain elongation; Eukaryotic Translation Termination; Viral mRNA Translation; L13a-mediated translational silencing of Ceruloplasmin expression; Nonsense Mediated Decay (NMD) independent of the Exon Junction Complex (EJC); Selenocysteine synthesis; Nonsense Mediated Decay (NMD) enhanced by the Exon Junction Complex (EJC); GTP hydrolysis and joining of the 60S ribosomal subunit; Major path…	Cytoplasmic Ribosomal Proteins	2099.32	4696.8	5672.66	1754.83	4266.53	5852.02	6393.97	6807.51	5014.62	4329.4	4339.85	3117.41	1969.55	2883.66	2847.21	4439.57	1794.89	4278.49	Peak Found	Peak Found	Peak Found	Peak Found	High	High	Peak Found	High	Peak Found	Not Found
High	P36578	60S ribosomal protein L4 [OS=Homo sapiens]	8	3	4	3	427	47.7	11.06	7.39	cell organization and biogenesis;metabolic process;transport	cytoplasm;cytosol;endoplasmic reticulum;membrane;nucleus;ribosome	protein binding;RNA binding;structural molecule activity	Pf00573, Pf14374	6124	ENSG00000174444.14	RPL4	15	Ribosome	Peptide chain elongation; Eukaryotic Translation Termination; Viral mRNA Translation; L13a-mediated translational silencing of Ceruloplasmin expression; Nonsense Mediated Decay (NMD) independent of the Exon Junction Complex (EJC); Selenocysteine synthesis; Nonsense Mediated Decay (NMD) enhanced by the Exon Junction Complex (EJC); GTP hydrolysis and joining of the 60S ribosomal subunit; Major path…	Cytoplasmic Ribosomal Proteins	5914.79	9280.96	5650.87	6650.76	10669.3	9489.98	7759.69	13594.4	9797.69	7267.86	6869.62	5917.17	11617	12789.2	12229.6	7205.17	6914.13	4370.69	Not Found	Peak Found	Peak Found	Peak Found	High	Peak Found	Peak Found	High	Peak Found	Not Found
High	P23229-1	integrin alpha-6 [OS=Homo sapiens]	11	9	89	9	1130	126.5	6.61	228.18	cell communication;cell differentiation;cell organization and biogenesis;cellular component movement;regulation of biological process;response to stimulus	cell surface;membrane	metal ion binding;protein binding	Pf01839, Pf08441, Pf13517	3655	ENSG00000091409.14	ITGA6	2	Arrhythmogenic right ventricular cardiomyopathy (ARVC); Dilated cardiomyopathy; Hematopoietic cell lineage; Cell adhesion molecules (CAMs); Pathways in cancer; Toxoplasmosis; Focal adhesion; Regulation of actin cytoskeleton; Small cell lung cancer; ECM-receptor interaction; PI3K-Akt signaling pathway; Hypertrophic cardiomyopathy (HCM)	Integrin cell surface interactions; Laminin interactions; Basigin interactions; Assembly of collagen fibrils and other multimeric structures; Type I hemidesmosome assembly; Syndecan interactions	Integrin-mediated Cell Adhesion; Arrhythmogenic Right Ventricular Cardiomyopathy; Alpha 6 Beta 4 signaling pathway; Focal Adhesion; Regulation of Apoptosis by Parathyroid Hormone-related Protein; Focal Adhesion-PI3K-Akt-mTOR-signaling pathway	250113	253199	211774	133743	150305	150926	195740	180702	173642	144045	130291	138060	287930	299737	210065	109098	142956	139026	High	High	High	High	High	High	High	High	High	High
High	P08195	4F2 cell-surface antigen heavy chain [OS=Homo sapiens]	12	6	118	6	630	68	5.01	280.42	cell growth;cellular component movement;metabolic process;response to stimulus;transport	cell surface;cytosol;membrane;nucleus	catalytic activity;protein binding;RNA binding;transporter activity	Pf00128	6520	ENSG00000168003.16	SLC3A2	11	Protein digestion and absorption; mTOR signaling pathway	Tryptophan catabolism; Basigin interactions; Amino acid transport across the plasma membrane		181213	187564	219462	93232.5	119542	116980	99538.2	128416	113284	100607	103570	81979.5	254101	257372	185820	78794.2	105931	102659	High	High	High	High	High	High	High	High	High	High
High	P35637-1	RNA-binding protein FUS [OS=Homo sapiens]	3	1	2	1	526	53.4	9.36	4.44	metabolic process;regulation of biological process;response to stimulus	cytoplasm;nucleus	DNA binding;metal ion binding;protein binding;RNA binding	Pf00076, Pf00641, Pf13893, Pf14259	2521	ENSG00000089280.18	FUS	16	Transcriptional misregulation in cancer	mRNA Splicing - Major Pathway	mRNA Processing	2115.25	4402.56	3030.82	2291.73	3912.12	3535.56	2863.92	6083.59	2807.33	2714.01	2294.04	1835.12	2210.52	3638.94	3671.58	1764.63	2725.55	2341.16	Not Found	Not Found	Not Found	Not Found	Peak Found	High	Not Found	High	Peak Found	Not Found
High	O76021	Ribosomal L1 domain-containing protein 1 [OS=Homo sapiens]	2	1	3	1	490	54.9	10.13	4.32	cell differentiation;metabolic process;regulation of biological process	membrane;nucleus	protein binding;RNA binding	Pf06030, Pf11797	26156	ENSG00000171490.12	RSL1D1	16			Senescence and Autophagy in Cancer	3891.05	2027.74	2627.8	2969.77	4189.72	5570.99	3000.59	5150.02	5640.07	6673.9	8896.41	10300.2	11894.8	3925.14	4103.51	11951.9	9171.62	4371.02	Not Found	Not Found	Not Found	Not Found	High	Peak Found	Not Found	High	High	Peak Found
High	P52209	6-phosphogluconate dehydrogenase, decarboxylating [OS=Homo sapiens]	6	2	13	2	483	53.1	7.23	26.76	metabolic process	cytoplasm;cytosol;nucleus	catalytic activity	Pf00393, Pf03446	5226	ENSG00000142657.20	PGD	1	Carbon metabolism; Glutathione metabolism; Pentose phosphate pathway; Metabolic pathways	Pentose phosphate pathway (hexose monophosphate shunt)	Pentose Phosphate Pathway; NRF2 pathway	23984.1	33351.8	25725	25250.8	34275.2	34789.8	33855.4	29387.7	35702.7	35598.4	33998.4	28751.2	39567.7	31950.1	28724.3	21570.8	40900	35423.2	Peak Found	High	Peak Found	High	High	High	Peak Found	High	High	Peak Found
High	Q14210	Lymphocyte antigen 6D [OS=Homo sapiens]	9	1	5	1	128	13.3	8.21	11.04	cell differentiation;metabolic process;response to stimulus	cell surface;extracellular;membrane			8581	ENSG00000167656.4	LY6D	8		Post-translational modification: synthesis of GPI-anchored proteins		3943.49	7657.13	12140.7	4264.93	5106.33	4512.77	6379.6	4513.83	6088.73	2206.04	2593.43	2971.14	13500.3	14602.7	5977.11	2710.13	2320.17	4014.14	Not Found	Peak Found	High	Not Found	Peak Found	High	Peak Found	High	High	Not Found
High	P04439	HLA class I histocompatibility antigen, A-3 alpha chain [OS=Homo sapiens]	16	5	32	4	365	40.8	6	45.06	metabolic process;regulation of biological process;response to stimulus	cell surface;endoplasmic reticulum;Golgi;membrane	protein binding;RNA binding	Pf00129, Pf07654	3105	ENSG00000206503.12	HLA-A	6		Interferon alpha/beta signaling; E3 ubiquitin ligases ubiquitinate target proteins; Endosomal/Vacuolar pathway; Immunoregulatory interactions between a Lymphoid and a non-Lymphoid cell; Interferon gamma signaling; Antigen Presentation: Folding, assembly and peptide loading of class I MHC; ER-Phagosome pathway	Proteasome Degradation; Allograft Rejection	1.26519e+06	432255	628844	212086	169646	556730	485807	301917	221294	520758	224504	473538	799486	512755	562786	702678	427491	498787	High	Peak Found	Peak Found	High	High	High	High	High	High	High
High	P00749	Urokinase-type plasminogen activator [OS=Homo sapiens]	2	1	3	1	431	48.5	8.41	6.31	cellular component movement;coagulation;metabolic process;regulation of biological process;response to stimulus;transport	cell surface;extracellular;membrane	catalytic activity;protein binding	Pf00051, Pf00089	5328		PLAU	10	MicroRNAs in cancer; NF-kappa B signaling pathway; Proteoglycans in cancer; Complement and coagulation cascades; Transcriptional misregulation in cancer	Dissolution of Fibrin Clot; Neutrophil degranulation	Osteopontin Signaling; Blood Clotting Cascade; Lung fibrosis; VEGFA-VEGFR2 Signaling Pathway; Wnt Signaling Pathway and Pluripotency; Wnt Signaling Pathway; Endochondral Ossification; Complement and Coagulation Cascades; Senescence and Autophagy in Cancer; DNA Damage Response (only ATM dependent)	2702.66	3191.79	3268.97	1858.82	2828.46	4313.41	1762.39	4862.4	4764.5	1897.85	3170.02	3118.96	3816.72	2095.67	2381.38	4395.47	2388.22	3292.29	Not Found	Not Found	Not Found	Not Found	High	Peak Found	Not Found	High	High	Not Found
High	P68104	Elongation factor 1-alpha 1 [OS=Homo sapiens]	13	7	48	7	462	50.1	9.01	99.58	metabolic process;regulation of biological process;response to stimulus;transport	cytoplasm;cytoskeleton;cytosol;extracellular;membrane;nucleus;organelle lumen	catalytic activity;nucleotide binding;protein binding;RNA binding	Pf00009, Pf03143, Pf03144	1915	ENSG00000156508.17	EEF1A1	6	RNA transport; Legionellosis	Peptide chain elongation; Protein methylation; Neutrophil degranulation; HSF1 activation	Translation Factors	65594	91259.8	87978.4	80632.6	106830	125969	102331	110380	117360	63990.6	71906.9	83233.7	180316	136095	110204	69858.9	77452.7	77035.4	High	High	High	High	High	High	High	High	High	Peak Found
High	P54709	sodium/potassium-transporting ATPase subunit beta-3 [OS=Homo sapiens]	6	2	9	2	279	31.5	8.35	7.44	cell organization and biogenesis;cellular component movement;cellular homeostasis;regulation of biological process;transport	cytoplasm;membrane	catalytic activity;enzyme regulator activity;protein binding;transporter activity	Pf00287	483	ENSG00000069849.10	ATP1B3	3	Bile secretion; cGMP-PKG signaling pathway; Endocrine and other factor-regulated calcium reabsorption; Protein digestion and absorption; Proximal tubule bicarbonate reclamation; Thyroid hormone signaling pathway; Insulin secretion; Adrenergic signaling in cardiomyocytes; Thyroid hormone synthesis; Pancreatic secretion; Aldosterone-regulated sodium reabsorption; Carbohydrate digestion and absorpti…	Ion homeostasis; Basigin interactions; Ion transport by P-type ATPases	Calcium Regulation in the Cardiac Cell	3676.01	9987.1	9560.32	2666.05	3639.31	5540.2	5213.27	6586.17	6422.93	3461.37	3028.05	1746	13769.6	11864.2	10835.1	4154.7	3248.53	2198.41	Peak Found	Peak Found	High	Peak Found	High	High	Peak Found	High	Peak Found	Peak Found
High	P11387	DNA topoisomerase 1 [OS=Homo sapiens]	1	1	1	1	765	90.7	9.31	1.89	cell death;cell division;cell organization and biogenesis;metabolic process;regulation of biological process;response to stimulus	chromosome;cytoplasm;nucleus	catalytic activity;DNA binding;nucleotide binding;protein binding;RNA binding	Pf01028, Pf02919, Pf14370	7150	ENSG00000198900.5	TOP1	20		SUMOylation of DNA replication proteins		2962.38	4439.94	3100.41	4082.06	1836.51	2857.57	2876.29	2172.19	3267.61	2838.24	1727.96	4338.98	2989.2	12966.3	25428.4	2571.09	3052.19	6181.34	Not Found	Not Found	Not Found	Not Found	Not Found	Not Found	Not Found	Not Found	Not Found	Not Found
High	O75477	erlin-1 [OS=Homo sapiens]	3	1	2	1	346	38.9	7.87	1.77	metabolic process;regulation of biological process;response to stimulus;transport	endoplasmic reticulum;membrane	protein binding	Pf01145	10613		ERLIN1	10		ABC-family proteins mediated transport; Defective CFTR causes cystic fibrosis		2461.07	2296.18	1928.08	5112.22	2945.37	2259.71	2132.69	7057.18	3401.1	3977.44	2278.9	3073.24	12099	4432.05	7138.34	3868.48	3190.89	3352.82	Not Found	Not Found	Not Found	Peak Found	Peak Found	High	Not Found	High	Peak Found	Not Found
High	P60709	Actin, cytoplasmic 1 [OS=Homo sapiens]	38	11	176	11	375	41.7	5.48	432.17	cell organization and biogenesis;cellular component movement;metabolic process;regulation of biological process;response to stimulus	cytoplasm;cytoskeleton;cytosol;membrane;nucleus	DNA binding;nucleotide binding;protein binding;structural molecule activity	Pf00022	60	ENSG00000075624.13	ACTB	7	Arrhythmogenic right ventricular cardiomyopathy (ARVC); Tight junction; Pathogenic Escherichia coli infection; Dilated cardiomyopathy; Hippo signaling pathway; Rap1 signaling pathway; Oxytocin signaling pathway; Thyroid hormone signaling pathway; Phagosome; Apoptosis; Focal adhesion; Proteoglycans in cancer; Salmonella infection; Adherens junction; Regulation of actin cytoskeleton; Leukocyte tran…	Formation of annular gap junctions; Cell-extracellular matrix interactions; UCH proteinases; MAP2K and MAPK activation; Interaction between L1 and Ankyrins; Factors involved in megakaryocyte development and platelet production; Translocation of GLUT4 to the plasma membrane; EPH-ephrin mediated repulsion of cells; Prefoldin mediated transfer of substrate to CCT/TriC; EPHB-mediated forward signalin…	Arrhythmogenic Right Ventricular Cardiomyopathy; Pathogenic Escherichia coli infection; Common Pathways Underlying Drug Addiction; Myometrial Relaxation and Contraction Pathways; Focal Adhesion; Fas Ligand (FasL) pathway and Stress induction of Heat Shock Proteins (HSP) regulation; Regulation of Actin Cytoskeleton	250539	278024	239854	210513	243683	232638	253226	247849	278936	169170	179241	182669	419403	343453	276703	196077	219572	184192	High	High	High	High	High	High	High	High	High	High
High	P35579-1	Myosin-9 [OS=Homo sapiens]	2	5	48	5	1960	226.4	5.6	84.46	cell differentiation;cell organization and biogenesis;cellular component movement;metabolic process;regulation of biological process;response to stimulus;transport	cytoplasm;cytoskeleton;cytosol;extracellular;membrane;nucleus	catalytic activity;motor activity;nucleotide binding;protein binding;RNA binding;transporter activity	Pf00063, Pf01442, Pf01496, Pf01576, Pf01765, Pf02736, Pf03962, Pf04111, Pf04156, Pf05911, Pf06637, Pf07888, Pf09731, Pf11068, Pf11559, Pf12128, Pf13094	4627	ENSG00000100345.20	MYH9	22	Tight junction; Salmonella infection; Regulation of actin cytoskeleton	RHO GTPases activate PAKs; EPHA-mediated growth cone collapse; RHO GTPases Activate ROCKs; Sema4D induced cell migration and growth-cone collapse; Regulation of actin dynamics for phagocytic cup formation; RHO GTPases activate CIT; RHO GTPases activate PKNs	Primary Focal Segmental Glomerulosclerosis FSGS; VEGFA-VEGFR2 Signaling Pathway	18439.1	14078.9	18076.7	16123	24349.6	22754	18717.9	25883.4	25365.9	27826.7	39196.2	33109	27568.2	29710.7	31799.3	23986.5	36429.5	41826.4	High	Peak Found	High	High	High	High	High	High	High	High
High	P07996	thrombospondin-1 [OS=Homo sapiens]	1	1	10	1	1170	129.3	4.94	15.67	cell organization and biogenesis;cellular component movement;defense response;metabolic process;regulation of biological process;response to stimulus;transport	cell surface;cytoplasm;endoplasmic reticulum;extracellular;organelle lumen	metal ion binding;protein binding	Pf00090, Pf00093, Pf02412, Pf05735, Pf12947	7057	ENSG00000137801.10	THBS1	15	TGF-beta signaling pathway; MicroRNAs in cancer; Rap1 signaling pathway; Phagosome; Focal adhesion; Malaria; Proteoglycans in cancer; p53 signaling pathway; Bladder cancer; ECM-receptor interaction; PI3K-Akt signaling pathway	Platelet degranulation ; Integrin cell surface interactions; RUNX1 regulates genes involved in megakaryocyte differentiation and platelet function; Defective B3GALTL causes Peters-plus syndrome (PpS); O-glycosylation of TSR domain-containing proteins; Signaling by PDGF; Syndecan interactions	Bladder Cancer; Apoptosis-related network due to altered Notch3 in ovarian cancer; miRNA targets in ECM and membrane receptors; Focal Adhesion; TGF-beta Signaling Pathway; Focal Adhesion-PI3K-Akt-mTOR-signaling pathway; Inflammatory Response Pathway; TGF-beta Receptor Signaling; Senescence and Autophagy in Cancer	23739.7	20453.6	13130.8	16038.2	15323.4	20757.4	17172.8	13076	13131.7	20841.1	22341.3	24997.3	36733.3	31714	19722.8	24555	26724.7	24618	Peak Found	Peak Found	High	Peak Found	High	High	High	Peak Found	High	High
High	P12532	Creatine kinase U-type, mitochondrial [OS=Homo sapiens]	2	1	2	1	417	47	8.34	5.18	metabolic process	membrane;mitochondrion	catalytic activity;nucleotide binding	Pf00217, Pf02807	1159; 548596	ENSG00000223572.9; ENSG00000237289.9	CKMT1B; CKMT1A	15	Metabolic pathways; Arginine and proline metabolism	Creatine metabolism		15898.8	16385.2	16299.9	11694.1	17401.6	18873.6	14454	18115.2	19738.9	14123.4	18720.3	16521.9	19496.3	23675.5	18588	12228.5	18331.8	20219.9	Peak Found	Peak Found	Peak Found	Peak Found	Peak Found	Peak Found	Peak Found	High	High	Peak Found
High	P98172	ephrin-B1 [OS=Homo sapiens]	3	1	3	1	346	38	8.94	8.62	cell communication;cell differentiation;cellular component movement;development;regulation of biological process;response to stimulus	cytoplasm;membrane;nucleus	protein binding	Pf00812	1947	ENSG00000090776.5	EFNB1	X	Axon guidance	EPH-ephrin mediated repulsion of cells; Ephrin signaling; EPHB-mediated forward signaling		3086.82	3563.29	2946.05	3361.01	4940.25	5612.31	4461.71	5875.16	3987.73	2482.68	4095.99	2259.96	2575.13	3380.11	2519.73	2856.55	2781.68	2757.14	Not Found	Not Found	Not Found	Peak Found	High	High	Not Found	High	Peak Found	Not Found
High	P00918	Carbonic anhydrase 2 [OS=Homo sapiens]	5	1	16	1	260	29.2	7.4	33.35	cellular homeostasis;metabolic process;regulation of biological process;response to stimulus;transport	cytoplasm;cytosol;membrane	catalytic activity;metal ion binding;protein binding	Pf00194	760	ENSG00000104267.9	CA2	8	Bile secretion; Proximal tubule bicarbonate reclamation; Pancreatic secretion; Gastric acid secretion; Nitrogen metabolism; Collecting duct acid secretion	Reversible hydration of carbon dioxide; Erythrocytes take up carbon dioxide and release oxygen; Erythrocytes take up oxygen and release carbon dioxide		2336.18	17019.1	13185.8	22111.2	21103	26012.5	17568.6	19048.2	20848	17718.9	20256	18821	18071.1	22600.9	14816.5	15601	26204.8	21318.8	Not Found	High	High	High	High	High	High	High	High	Peak Found
High	P35268	60S ribosomal protein L22 [OS=Homo sapiens]	10	1	5	1	128	14.8	9.19	10.85	cell organization and biogenesis;metabolic process;transport	cytoplasm;cytosol;nucleus;ribosome	protein binding;RNA binding;structural molecule activity	Pf01776	6146	ENSG00000116251.9	RPL22	1	Ribosome	Peptide chain elongation; Eukaryotic Translation Termination; Viral mRNA Translation; L13a-mediated translational silencing of Ceruloplasmin expression; Nonsense Mediated Decay (NMD) independent of the Exon Junction Complex (EJC); Selenocysteine synthesis; Nonsense Mediated Decay (NMD) enhanced by the Exon Junction Complex (EJC); GTP hydrolysis and joining of the 60S ribosomal subunit; Major path…	Cytoplasmic Ribosomal Proteins	2642.38	2272.4	7825.08	3155.8	6098.15	6144.65	3651.49	3827.74	5199.3	2969.13	3225.23	3005.97	10258.2	10449.7	10150.6	2303.69	3405.08	4189.12	Not Found	Not Found	Peak Found	Not Found	High	High	Not Found	High	High	Not Found
High	P02538	Keratin, type II cytoskeletal 6A [OS=Homo sapiens]	26	13	64	1	564	60	8	155.09	cell death;cell differentiation;cell organization and biogenesis;defense response;metabolic process;regulation of biological process;response to stimulus	cytosol;membrane;nucleus	protein binding;structural molecule activity	Pf00038, Pf04111, Pf13166	3853	ENSG00000205420.10	KRT6A	12		Formation of the cornified envelope	Ectoderm Differentiation	42972.4	61136.2	55732.4	60913.9	75074.5	80790.1	59260.5	81729.9	75058.7	30944.9	48786.7	24686.3	69134.3	65044.4	48698.8	19663.9	35311.6	40094.1	Not Found	Not Found	Not Found	Not Found	High	Not Found	High	Not Found	Not Found	High
High	P27824	Calnexin [OS=Homo sapiens]	6	3	13	3	592	67.5	4.6	31.14	metabolic process;regulation of biological process;response to stimulus;transport	cytoplasm;endoplasmic reticulum;membrane;organelle lumen;ribosome	metal ion binding;protein binding;RNA binding	Pf00262	821	ENSG00000127022.14; ENSG00000283777.1	CANX	5; CHR_HG30_PATCH	Protein processing in endoplasmic reticulum; HTLV-I infection; Phagosome; Thyroid hormone synthesis; Antigen processing and presentation	Assembly of Viral Components at the Budding Site; Antigen Presentation: Folding, assembly and peptide loading of class I MHC; Interleukin-35 Signalling; Calnexin/calreticulin cycle; MHC class II antigen presentation		4004.3	11276.2	11447.3	10046.6	14812.4	14328.3	8569.2	16580.1	10887.9	6801.93	4936.6	9142.5	5044.86	11729.3	12190.3	8574.08	7805.81	7473.25	Not Found	Peak Found	High	Peak Found	High	High	Peak Found	High	High	Peak Found
High	P06748	Nucleophosmin [OS=Homo sapiens]	6	2	5	2	294	32.6	4.78	9.17	cell growth;cell organization and biogenesis;cellular homeostasis;metabolic process;regulation of biological process;response to stimulus;transport	cytoplasm;cytoskeleton;cytosol;membrane;nucleus	DNA binding;enzyme regulator activity;protein binding;RNA binding	Pf03066	4869	ENSG00000181163.13	NPM1	5		Nuclear import of Rev protein; TFAP2A acts as a transcriptional repressor during retinoic acid induced cell differentiation; TP53 regulates transcription of additional cell cycle genes whose exact role in the p53 pathway remain uncertain; Deposition of new CENPA-containing nucleosomes at the centromere		4557.18	10810.2	4909.32	7884.72	12284.5	10951.4	8323.54	10648.1	10233.7	4997.51	4369.83	6082.3	6071.84	5954.18	8266.57	7218.29	5050.24	5812.15	Not Found	Peak Found	Not Found	Peak Found	High	High	Not Found	Peak Found	High	Not Found
High	Q07954	prolow-density lipoprotein receptor-related protein 1 [OS=Homo sapiens]	0	1	3	1	4544	504.3	5.39	6.02	cell proliferation;development;metabolic process;regulation of biological process;response to stimulus;transport	cytoplasm;cytosol;endosome;membrane;nucleus	metal ion binding;protein binding;receptor activity;RNA binding;transporter activity	Pf00057, Pf00058, Pf07645, Pf12662, Pf14670	4035	ENSG00000123384.13	LRP1	12	Malaria; Alzheimer's disease	Signaling by GPCR; Scavenging of heme from plasma; Retinoid metabolism and transport	Alzheimers Disease; Regulation of Wnt/B-catenin Signaling by Small Molecule Compounds; Statin Pathway	4181.13	4239.14	3604.65	1778.64	4378.77	3680.28	2780.55	5350.55	5944.89	2238.98	2931.33	2896.71	4244.23	1796.92	2686.16	3447.2	2023.7	4356.37	Not Found	Not Found	Not Found	Not Found	High	Peak Found	Not Found	High	High	Not Found
High	P61978	Heterogeneous nuclear ribonucleoprotein K [OS=Homo sapiens]	8	2	12	2	463	50.9	5.54	37.84	metabolic process;regulation of biological process;response to stimulus	cytoplasm;membrane;nucleus;spliceosomal complex	DNA binding;protein binding;RNA binding	Pf00013, Pf08067, Pf13014, Pf13083	3190	ENSG00000165119.20	HNRNPK	9	Viral carcinogenesis; MicroRNAs in cancer; Spliceosome; Herpes simplex infection	mRNA Splicing - Major Pathway; SUMOylation of RNA binding proteins	mRNA Processing	2897.45	6289.5	8295.83	5919.35	8178.72	8402.49	8427.46	9310.07	6263.68	8096.31	6963.07	6413.07	2541.79	13317.1	7542.21	2482.28	8287.09	9153.33	Not Found	Peak Found	Peak Found	High	High	High	Peak Found	High	High	Peak Found
High	P51649-1	Succinate-semialdehyde dehydrogenase, mitochondrial [OS=Homo sapiens]	2	1	7	1	535	57.2	8.28	16.08	cell organization and biogenesis;metabolic process	mitochondrion;organelle lumen	catalytic activity;nucleotide binding;protein binding	Pf00171	7915	ENSG00000112294.12	ALDH5A1	6	Butanoate metabolism; Alanine, aspartate and glutamate metabolism; Metabolic pathways	Degradation of GABA		28599.5	4226.05	2098.06	11262.6	2238.22	15582.8	19829.2	16577.4	18493.2	4659.59	3343.07	2098.46	31512.7	30282.5	4170.51	13487.3	4005.02	1790.24	High	Not Found	Not Found	High	Not Found	High	High	High	High	Peak Found
High	P50895	Basal cell adhesion molecule [OS=Homo sapiens]	8	3	40	3	628	67.4	5.81	96.08	regulation of biological process;response to stimulus	cell surface;extracellular;membrane	protein binding;receptor activity;signal transducer activity	Pf00047, Pf07679, Pf08205, Pf13895, Pf13927	4059	ENSG00000187244.10	BCAM	19				71026	80921.9	75351.3	41655.6	44729.2	48698.9	47375.2	60863.3	54974.9	25874.3	25794.5	16713.7	119576	90105.4	85449.3	16102.9	31503	31238.2	Peak Found	High	High	High	High	High	Peak Found	High	High	High
High	Q9ULV4	coronin-1C [OS=Homo sapiens]	2	1	1	1	474	53.2	7.08	2.01	cell organization and biogenesis;cellular component movement;regulation of biological process;response to stimulus;transport	cytoplasm;cytoskeleton;membrane	protein binding	Pf00400, Pf08953, Pf08954	23603	ENSG00000110880.10	CORO1C	12				4432.88	2138.15	2405.24	3642.44	4289	6464.16	2054.03	4038.77	4663.09	1771.71	2498.77	3873.27	2881.06	1919.42	4061.77	3079.54	2893.84	3818.13	Not Found	Not Found	Not Found	Not Found	High	Peak Found	Not Found	Peak Found	Peak Found	Not Found
High	Q99714-1	3-hydroxyacyl-CoA dehydrogenase type-2 [OS=Homo sapiens]	8	1	3	1	261	26.9	7.78	9.41	cell organization and biogenesis;metabolic process	cytoplasm;membrane;mitochondrion;organelle lumen	catalytic activity;protein binding;RNA binding	Pf00106, Pf08659, Pf13561	3028	ENSG00000072506.12	HSD17B10	X	Alzheimer's disease; Metabolic pathways; Valine, leucine and isoleucine degradation	tRNA processing in the mitochondrion; rRNA processing in the mitochondrion; Branched-chain amino acid catabolism; tRNA modification in the mitochondrion	Alzheimers Disease; Valproic acid pathway; Tryptophan metabolism	3329.34	4264.08	6209.17	3132.74	3182.13	3896.74	4194.22	3316.49	4528.46	2093.03	2320.77	3505.33	2595.03	3930.67	12363.1	2865.94	4432.71	2786.65	Not Found	Not Found	Peak Found	Not Found	High	Peak Found	Not Found	Peak Found	High	Not Found
High	Q99700-1	Ataxin-2 [OS=Homo sapiens]	1	1	9	1	1313	140.2	9.57	26.94	cell organization and biogenesis;metabolic process;regulation of biological process;transport	cytoplasm;Golgi;membrane	protein binding;RNA binding	Pf06741, Pf07145, Pf09770, Pf14438	6311	ENSG00000204842.14	ATXN2	12			Parkinsons Disease Pathway; EGF/EGFR Signaling Pathway	1789.47	7817.67	14445.7	7533.86	18299.4	21656.3	9106	16798.7	18054.7	10097.6	15985.2	15790.6	15054.8	16911.4	10492.4	2671.11	19508.4	22316.8	Not Found	Peak Found	Peak Found	Peak Found	High	High	Peak Found	High	High	Peak Found
High	P05783	Keratin, type I cytoskeletal 18 [OS=Homo sapiens]	2	1	8	1	430	48	5.45	16.14	cell death;cell organization and biogenesis;regulation of biological process;response to stimulus;transport	cytoplasm;cytosol;nucleus	protein binding;RNA binding;structural molecule activity	Pf00038	3875	ENSG00000111057.10	KRT18	12	Pathogenic Escherichia coli infection	Formation of the cornified envelope	Pathogenic Escherichia coli infection	23813	27320	24276.2	17970.7	20813.8	29449.5	23286	25429.3	28549.7	13526	15040.6	8951.9	62608.4	36770.7	29797.9	11778.1	17703.4	16759.2	Peak Found	High	High	High	High	High	Peak Found	Peak Found	Peak Found	Peak Found
High	P04083	annexin A1 [OS=Homo sapiens]	11	2	3	2	346	38.7	7.02	7.44	cell differentiation;cell organization and biogenesis;cellular component movement;defense response;metabolic process;regulation of biological process;response to stimulus;transport	cell surface;cytoplasm;cytoskeleton;cytosol;endosome;extracellular;membrane;nucleus;vacuole	catalytic activity;DNA binding;enzyme regulator activity;metal ion binding;protein binding;RNA binding;structural molecule activity	Pf00191	301	ENSG00000135046.13	ANXA1	9		Gastrin-CREB signalling pathway via PKC and MAPK; G alpha (i) signalling events; Smooth Muscle Contraction; Interleukin-4 and 13 signaling; Formyl peptide receptors bind formyl peptides and many other ligands	Integrated Breast Cancer Pathway; Spinal Cord Injury; VEGFA-VEGFR2 Signaling Pathway; Prostaglandin Synthesis and Regulation	5395.23	6246.65	5175.53	4751.97	7657.13	12149.1	6721.13	5710.16	6126.92	6119.57	6331.3	6035.34	6734.4	6148.74	6004.64	6636.36	7856.65	7613.69	Not Found	Not Found	Not Found	Not Found	High	High	Not Found	Peak Found	Peak Found	Not Found
High	Q8TB61	Adenosine 3'-phospho 5'-phosphosulfate transporter 1 [OS=Homo sapiens]	3	1	2	1	432	47.5	9.16	5.1	metabolic process;regulation of biological process;response to stimulus;transport	Golgi;membrane	signal transducer activity;transporter activity	Pf08449	347734	ENSG00000157593.18	SLC35B2	6		Transport and synthesis of PAPS; Transport of nucleotide sugars		2958.35	2867.82	4060.73	3594.04	2956.13	4090.43	1898.77	4078.99	2124.92	3898.21	3091.32	2712.16	3727.55	2130.74	5750.13	3867.18	4196.88	2387	Not Found	Not Found	Not Found	Not Found	Peak Found	High	Not Found	High	Not Found	Not Found
High	Q13751	Laminin subunit beta-3 [OS=Homo sapiens]	1	1	3	1	1172	129.5	7.21	7.96	cell differentiation;cell organization and biogenesis	extracellular	protein binding;structural molecule activity	Pf00053, Pf00055, Pf13514	3914	ENSG00000196878.14	LAMB3	1	Amoebiasis; Pathways in cancer; Toxoplasmosis; Focal adhesion; Small cell lung cancer; ECM-receptor interaction; PI3K-Akt signaling pathway	Laminin interactions; Degradation of the extracellular matrix; MET activates PTK2 signaling; Type I hemidesmosome assembly; Anchoring fibril formation; Non-integrin membrane-ECM interactions	Alpha 6 Beta 4 signaling pathway; Focal Adhesion; Focal Adhesion-PI3K-Akt-mTOR-signaling pathway	3447.76	3765.72	4382.92	4086.87	5676.64	4955.67	3760.19	5518.96	5645.72	2091.57	3073.68	3295.87	3709.07	3298.03	4125	4007.25	2323.87	3846.77	Not Found	Not Found	Peak Found	Peak Found	High	Peak Found	Not Found	High	High	Not Found
High	Q96RQ3	Methylcrotonoyl-CoA carboxylase subunit alpha, mitochondrial [OS=Homo sapiens]	2	1	304	1	725	80.4	7.78	882.49	cell organization and biogenesis;metabolic process	cytosol;membrane;mitochondrion;organelle lumen	catalytic activity;metal ion binding;nucleotide binding;protein binding	Pf00289, Pf00364, Pf01071, Pf02222, Pf02655, Pf02785, Pf02786, Pf07478, Pf08443, Pf13533, Pf13535, Pf15632	56922	ENSG00000078070.12	MCCC1	3	Metabolic pathways; Valine, leucine and isoleucine degradation	Branched-chain amino acid catabolism; Biotin transport and metabolism; Defective HLCS causes multiple carboxylase deficiency	Amino Acid metabolism	2.57614e+06	682791	926273	1.03213e+06	270884	170770	580199	273705	286426	590727	332812	401368	858274	672579	828162	1.55328e+06	503030	432250	High	High	High	High	High	High	High	High	High	High
High	P62081	40S ribosomal protein S7 [OS=Homo sapiens]	4	1	6	1	194	22.1	10.1	8.79	cell organization and biogenesis;metabolic process;regulation of biological process;transport	cytoplasm;cytoskeleton;cytosol;membrane;nucleus;ribosome	protein binding;RNA binding;structural molecule activity	Pf01251	6201	ENSG00000171863.12	RPS7	2	Ribosome	Peptide chain elongation; Eukaryotic Translation Termination; Viral mRNA Translation; Formation of the ternary complex, and subsequently, the 43S complex; L13a-mediated translational silencing of Ceruloplasmin expression; Selenocysteine synthesis; Nonsense Mediated Decay (NMD) independent of the Exon Junction Complex (EJC); Nonsense Mediated Decay (NMD) enhanced by the Exon Junction Complex (EJC)…	Cytoplasmic Ribosomal Proteins	15028.7	9702.91	8337.1	7043.46	5785.75	5791.92	11995.8	7491.25	7179.47	9626.53	7383.16	7077.57	14767.4	10506.5	9093.84	9381.92	10491.1	9591.27	Peak Found	Peak Found	Peak Found	Peak Found	High	Peak Found	High	High	High	Peak Found
High	P00558	phosphoglycerate kinase 1 [OS=Homo sapiens]	8	3	8	3	417	44.6	8.1	16.7	cell differentiation;metabolic process;regulation of biological process;response to stimulus	cytoplasm;cytosol;membrane	catalytic activity;nucleotide binding;protein binding	Pf00162	5230	ENSG00000102144.13	PGK1	X	HIF-1 signaling pathway; Carbon metabolism; Glycolysis / Gluconeogenesis; Biosynthesis of amino acids; Metabolic pathways	Gluconeogenesis; Glycolysis	Cori Cycle; Photodynamic therapy-induced HIF-1 survival signaling; Glycolysis and Gluconeogenesis	6299.25	4187.37	8341.54	5469.71	10046.9	9324.71	5793.05	8027.09	7803.37	5830.45	8864.45	4270.33	7111.22	8831.5	5580.06	7639.45	7339.07	7690.19	Not Found	Not Found	Not Found	Peak Found	High	High	Not Found	High	High	Not Found
High	O60563	Cyclin-T1 [OS=Homo sapiens]	4	1	1	1	726	80.6	8.78	2.41	cell division;metabolic process;regulation of biological process	nucleus	catalytic activity;DNA binding;enzyme regulator activity;protein binding;RNA binding	Pf00134	904	ENSG00000129315.10	CCNT1	12	Transcriptional misregulation in cancer	RNA polymerase II transcribes snRNA genes; Interactions of Tat with host cellular proteins; Tat-mediated HIV elongation arrest and recovery; Pausing and recovery of HIV elongation; Formation of HIV-1 elongation complex containing HIV-1 Tat; HIV elongation arrest and recovery; SMAD2/SMAD3:SMAD4 heterotrimer regulates transcription; TP53 Regulates Transcription of DNA Repair Genes; Formation of RNA…	Initiation of transcription and translation elongation at the HIV-1 LTR	2245.82	1964.75	2141.66	3627.92	3803.4	3287.06	3323.85	1865.19	2294.92	2066.69	2575.31	4027.93	1907.54	2108.48	10301.8	2712.94	4388.32	3376.6	Not Found	Not Found	Not Found	Not Found	Not Found	Not Found	Not Found	Not Found	Not Found	Not Found
High	P68371	Tubulin beta-4B chain [OS=Homo sapiens]	7	2	103	1	445	49.8	4.89	334.5	cell organization and biogenesis;cellular component movement;defense response;regulation of biological process;response to stimulus;transport	cytoplasm;cytoskeleton;cytosol;extracellular;nucleus;organelle lumen	catalytic activity;nucleotide binding;protein binding;RNA binding;structural molecule activity	Pf00091, Pf03953, Pf10644	10383	ENSG00000188229.5	TUBB4B	9	Pathogenic Escherichia coli infection; Gap junction; Phagosome	COPI-independent Golgi-to-ER retrograde traffic; COPI-dependent Golgi-to-ER retrograde traffic; Carboxyterminal post-translational modifications of tubulin; Regulation of PLK1 Activity at G2/M Transition; Recruitment of NuMA to mitotic centrosomes; Hedgehog 'off' state; Loss of Nlp from mitotic centrosomes; Translocation of GLUT4 to the plasma membrane; Prefoldin mediated transfer of substrate to…	Pathogenic Escherichia coli infection; Parkin-Ubiquitin Proteasomal System pathway	2045.48	4442.36	2193.27	4181.74	4810.25	5740.19	3437.65	4607.62	6498.31	6959.13	7030.99	7327.06	8978.79	8629.15	3673.02	2676.69	9300.09	11627.6	Not Found	Not Found	Not Found	Not Found	Peak Found	High	Not Found	High	High	Peak Found
High	P11021	78 kDa glucose-regulated protein [OS=Homo sapiens]	9	4	8	4	654	72.3	5.16	16.63	cell communication;cell death;cell differentiation;cell organization and biogenesis;metabolic process;regulation of biological process;response to stimulus;transport	cell surface;cytoplasm;endoplasmic reticulum;membrane;mitochondrion;nucleus;organelle lumen	catalytic activity;metal ion binding;nucleotide binding;protein binding	Pf00012, Pf01968, Pf06723	3309	ENSG00000044574.7	HSPA5	9	Prion diseases; Protein export; Protein processing in endoplasmic reticulum; Thyroid hormone synthesis; Antigen processing and presentation	Platelet degranulation ; PERK regulates gene expression; ATF6 (ATF6-alpha) activates chaperone genes; Antigen Presentation: Folding, assembly and peptide loading of class I MHC; Regulation of HSF1-mediated heat shock response; IRE1alpha activates chaperones	Parkin-Ubiquitin Proteasomal System pathway; Apoptosis-related network due to altered Notch3 in ovarian cancer; Photodynamic therapy-induced unfolded protein response; MAPK Signaling Pathway	24136.5	24983.5	22730.4	16967.8	23319.7	28740.6	19242.1	24806.1	21728.4	16518.3	16256.6	11391.4	38037.1	31375.6	27490	21278.2	21619.2	21731.8	Peak Found	Peak Found	Peak Found	High	High	High	Peak Found	High	High	Peak Found
High	P18124	60S ribosomal protein L7 [OS=Homo sapiens]	5	1	3	1	248	29.2	10.65	6.22	cell organization and biogenesis;metabolic process;transport	cytoplasm;cytosol;membrane;nucleus;ribosome	DNA binding;protein binding;RNA binding;structural molecule activity	Pf00327, Pf08079	6129	ENSG00000147604.13	RPL7	8	Ribosome	Peptide chain elongation; Eukaryotic Translation Termination; Viral mRNA Translation; L13a-mediated translational silencing of Ceruloplasmin expression; Nonsense Mediated Decay (NMD) independent of the Exon Junction Complex (EJC); Selenocysteine synthesis; Nonsense Mediated Decay (NMD) enhanced by the Exon Junction Complex (EJC); GTP hydrolysis and joining of the 60S ribosomal subunit; Major path…	Cytoplasmic Ribosomal Proteins	1924.32	3238.38	2147.08	3832.92	3809.15	4472.48	3926.94	4508.55	4661.75	3334.77	1834.09	1746.61	1740.17	9481.14	5786.63	2447.78	3823.24	2157.33	Not Found	Not Found	Not Found	Peak Found	High	Peak Found	Not Found	High	High	Not Found
High	P07437	tubulin beta chain [OS=Homo sapiens]	11	3	125	2	444	49.6	4.89	389.8	cell division;cell organization and biogenesis;cellular component movement;defense response;regulation of biological process;response to stimulus;transport	cytoplasm;cytoskeleton;extracellular;membrane;nucleus;organelle lumen	catalytic activity;nucleotide binding;protein binding;structural molecule activity	Pf00091, Pf03953, Pf10644	203068	ENSG00000232575.10; ENSG00000196230.12; ENSG00000227739.10; ENSG00000224156.10; ENSG00000235067.10; ENSG00000229684.10; ENSG00000183311.16; ENSG00000232421.10	TUBB	6; CHR_HSCHR6_MHC_MANN_CTG1; CHR_HSCHR6_MHC_COX_CTG1; CHR_HSCHR6_MHC_APD_CTG1; CHR_HSCHR6_MHC_DBB_CTG1; CHR_HSCHR6_MHC_MCF_CTG1; CHR_HSCHR6_MHC_QBL_CTG1; CHR_HSCHR6_MHC_SSTO_CTG1	Pathogenic Escherichia coli infection; Gap junction; Phagosome	Neutrophil degranulation; Regulation of PLK1 Activity at G2/M Transition; AURKA Activation by TPX2; Anchoring of the basal body to the plasma membrane; Recruitment of NuMA to mitotic centrosomes; Loss of Nlp from mitotic centrosomes; Recruitment of mitotic centrosome proteins and complexes	Pathogenic Escherichia coli infection; Parkin-Ubiquitin Proteasomal System pathway	3924.58	27319.4	22459.7	15688.5	22965.2	26115	19612.5	29560.3	23292.7	29694.3	22817.2	22650.8	32971.3	45365.4	33260.6	15560.9	35949.8	30487	Not Found	High	High	High	High	High	High	High	High	High
High	P39023	60S ribosomal protein L3 [OS=Homo sapiens]	8	3	14	3	403	46.1	10.18	31.23	cell organization and biogenesis;metabolic process;response to stimulus;transport	cytoplasm;cytosol;nucleus;ribosome	protein binding;RNA binding;structural molecule activity	Pf00297	6122	ENSG00000100316.15	RPL3	22	Ribosome	Peptide chain elongation; Eukaryotic Translation Termination; Viral mRNA Translation; L13a-mediated translational silencing of Ceruloplasmin expression; Nonsense Mediated Decay (NMD) independent of the Exon Junction Complex (EJC); Selenocysteine synthesis; Nonsense Mediated Decay (NMD) enhanced by the Exon Junction Complex (EJC); GTP hydrolysis and joining of the 60S ribosomal subunit; Major path…	Cytoplasmic Ribosomal Proteins	37575.2	31913.3	39241.2	16204.9	14874.8	25288.9	19429.5	19422.7	18367.5	27857	18639.9	32734.1	20457.8	49542.3	57257.1	22127.7	37225.4	49347	Peak Found	High	Peak Found	Peak Found	High	High	High	High	High	High
High	P10599-1	thioredoxin [OS=Homo sapiens]	19	2	10	2	105	11.7	4.92	10.98	cell communication;cell proliferation;cellular component movement;cellular homeostasis;metabolic process;regulation of biological process;response to stimulus;transport	cytoplasm;cytosol;extracellular;mitochondrion;nucleus	antioxidant activity;catalytic activity;protein binding;RNA binding	Pf00085, Pf00462, Pf13098, Pf13899, Pf13905	7295	ENSG00000136810.12	TXN	9	NOD-like receptor signaling pathway	Interconversion of nucleotide di- and triphosphates; Protein repair; TP53 Regulates Metabolic Genes; The NLRP3 inflammasome; Oxidative Stress Induced Senescence; Detoxification of Reactive Oxygen Species	Selenium Micronutrient Network; TNF alpha Signaling Pathway; NRF2 pathway; VEGFA-VEGFR2 Signaling Pathway	3356.03	2747.85	2270.91	3807.8	6438.6	8366.67	2408.74	4270.85	5861.81	4324.51	3031.14	2832.51	3915.57	2113.97	1733.59	3699.51	4235.58	4350.27	Not Found	Peak Found	High	Not Found	High	High	Not Found	High	High	Not Found
High	P40926	Malate dehydrogenase, mitochondrial [OS=Homo sapiens]	4	1	4	1	338	35.5	8.68	9.1	metabolic process	membrane;mitochondrion;nucleus;organelle lumen	catalytic activity;nucleotide binding;protein binding;RNA binding	Pf00056, Pf01073, Pf01118, Pf02866, Pf13460	4191	ENSG00000146701.11	MDH2	7	Citrate cycle (TCA cycle); Carbon metabolism; Pyruvate metabolism; Metabolic pathways; Cysteine and methionine metabolism; Glyoxylate and dicarboxylate metabolism	Gluconeogenesis; Citric acid cycle (TCA cycle)	Amino Acid metabolism; Glycolysis and Gluconeogenesis; TCA Cycle	1816.75	8190.5	7328.69	5287.7	5196.81	7662.89	8856.01	6184.34	6150.17	5895.78	4983.71	3463.2	3292.04	7426.03	2630.15	4448.57	6991.91	11105.8	Not Found	Peak Found	Peak Found	Peak Found	High	High	Peak Found	High	High	Peak Found
High	Q14512	Fibroblast growth factor-binding protein 1 [OS=Homo sapiens]	6	1	10	1	234	26.2	9.1	25.21	cell communication;regulation of biological process;response to stimulus	cell surface;extracellular;membrane	protein binding	Pf06473	9982	ENSG00000137440.4	FGFBP1	4		FGFR2b ligand binding and activation		3868.53	10830.9	13937.5	6419.2	8340.01	9619.07	6691.29	9285.18	12108.5	3810.99	4963.63	4269.72	14608.2	16170.9	15734.8	2499.31	6153.22	12272.7	Not Found	High	High	Peak Found	High	High	High	High	High	Not Found
High	P09936	Ubiquitin carboxyl-terminal hydrolase isozyme L1 [OS=Homo sapiens]	5	1	20	1	223	24.8	5.48	46.48	cell communication;cell organization and biogenesis;cell proliferation;cellular component movement;metabolic process;regulation of biological process;response to stimulus;transport	cytoplasm;cytosol;endoplasmic reticulum;membrane	catalytic activity;protein binding	Pf01088	7345	ENSG00000154277.12	UCHL1	4	Parkinson's disease	UCH proteinases	Proteasome Degradation; Parkinsons Disease Pathway; Hepatitis C and Hepatocellular Carcinoma	35741	21199.7	23049.6	24063.6	25232.9	22045.8	30320.9	21435.3	26561.9	39549.4	24134.2	19451.9	53780.8	37500.1	29989.4	34515.8	40158.8	35173.1	Peak Found	Peak Found	High	Peak Found	High	High	High	High	High	High
High	Q16787-1	Isoform 1 of Laminin subunit alpha-3 [OS=Homo sapiens]	5	6	33	6	1724	190.4	8.15	89.36	cell differentiation;cell organization and biogenesis;cellular component movement;regulation of biological process	extracellular	catalytic activity;motor activity;protein binding;structural molecule activity	Pf00038, Pf00053, Pf00054, Pf01576, Pf02210, Pf03938, Pf05557, Pf06008, Pf06009, Pf06873, Pf07888, Pf10174, Pf11985, Pf12128, Pf13385, Pf13851	3909		LAMA3	18			Alpha 6 Beta 4 signaling pathway; Focal Adhesion; Overview of nanoparticle effects; Focal Adhesion-PI3K-Akt-mTOR-signaling pathway	37276.7	59233.8	50415.4	55013	58000.3	63319.3	61543.2	74816.5	69019.5	28900.7	31344.5	27302.2	66077.5	80794.2	98801.5	35402.8	42637.8	59847.7	Peak Found	High	High	High	High	High	High	High	High	Peak Found
High	P11216	Glycogen phosphorylase, brain form [OS=Homo sapiens]	1	1	2	1	843	96.6	6.86	1.97	metabolic process;transport	cytoplasm;extracellular;membrane;organelle lumen	catalytic activity;protein binding	Pf00343	5834	ENSG00000100994.11	PYGB	20	Insulin signaling pathway; Glucagon signaling pathway; Starch and sucrose metabolism; Metabolic pathways; Insulin resistance	Neutrophil degranulation; Glycogen breakdown (glycogenolysis)	Glycogen Metabolism	2116.58	2816.57	7698.69	7700.52	7068.82	8154.98	4078.5	5891.81	5078.37	3971.24	6241.87	4319.02	3508.67	2919.59	3329.45	1800.38	6703.32	6430.64	Not Found	Not Found	Peak Found	Peak Found	High	Peak Found	Not Found	High	Peak Found	Not Found
High	Q9UKM9-1	RNA-binding protein Raly [OS=Homo sapiens]	7	2	2	2	306	32.4	9.17	4.25	metabolic process;regulation of biological process	nucleus;spliceosomal complex	protein binding;RNA binding	Pf00076, Pf13893, Pf14259	22913	ENSG00000125970.11	RALY	20				3056.01	3206.4	2635.93	3774.32	2007.87	3117.09	4211.38	4274.6	3161.56	3828.83	9436.86	13559.6	3949.1	2057.09	2298.53	3844.07	14102.8	15366.5	Not Found	Not Found	Not Found	Not Found	Peak Found	Peak Found	Not Found	Not Found	Not Found	Not Found
High	P32969	60S ribosomal protein L9 [OS=Homo sapiens]	6	1	6	1	192	21.9	9.95	10.76	cell organization and biogenesis;metabolic process;transport	cytosol;membrane;nucleus;ribosome	protein binding;RNA binding;structural molecule activity	Pf00347	6133	ENSG00000163682.15	RPL9	4	Ribosome	Peptide chain elongation; Eukaryotic Translation Termination; Viral mRNA Translation; L13a-mediated translational silencing of Ceruloplasmin expression; Nonsense Mediated Decay (NMD) independent of the Exon Junction Complex (EJC); Selenocysteine synthesis; Nonsense Mediated Decay (NMD) enhanced by the Exon Junction Complex (EJC); GTP hydrolysis and joining of the 60S ribosomal subunit; Major path…	Cytoplasmic Ribosomal Proteins	4267.18	7237.49	2334.52	1728.92	4327.61	5350.99	4393.17	5656.49	5242.37	1932.57	9426.44	8374.06	9391.39	10325.1	8153.36	9470.2	17292.1	12599.1	Not Found	Peak Found	High	Not Found	High	High	Not Found	High	Peak Found	Not Found
High	P05023	Sodium/potassium-transporting ATPase subunit alpha-1 [OS=Homo sapiens]	2	1	5	1	1023	112.8	5.49	13.95	cell communication;cellular homeostasis;metabolic process;regulation of biological process;response to stimulus;transport	endoplasmic reticulum;endosome;Golgi;membrane	catalytic activity;metal ion binding;nucleotide binding;protein binding;transporter activity	Pf00122, Pf00689, Pf00690, Pf00702, Pf08282, Pf12710, Pf13246	476	ENSG00000163399.15	ATP1A1	1	Bile secretion; cGMP-PKG signaling pathway; Endocrine and other factor-regulated calcium reabsorption; Protein digestion and absorption; Proximal tubule bicarbonate reclamation; Thyroid hormone signaling pathway; Insulin secretion; Adrenergic signaling in cardiomyocytes; Thyroid hormone synthesis; Pancreatic secretion; Aldosterone-regulated sodium reabsorption; Carbohydrate digestion and absorpti…	Ion homeostasis; Ion transport by P-type ATPases	Preimplantation Embryo	1894.56	4852.16	11854.4	3564.17	5674.8	7386.69	3292.26	9333.49	4640.45	4459.3	2892.89	2452.92	4149.14	16105.9	20171.7	3685.81	4394	6255.71	Not Found	Peak Found	High	Peak Found	High	High	Not Found	High	Peak Found	Not Found
High	P61927	60S ribosomal protein L37 [OS=Homo sapiens]	7	1	15	1	97	11.1	11.74	34.79	cell organization and biogenesis;metabolic process;transport	cytosol;ribosome	metal ion binding;RNA binding;structural molecule activity	Pf01907	6167	ENSG00000145592.13	RPL37	5	Ribosome	Peptide chain elongation; Eukaryotic Translation Termination; Viral mRNA Translation; L13a-mediated translational silencing of Ceruloplasmin expression; Nonsense Mediated Decay (NMD) independent of the Exon Junction Complex (EJC); Selenocysteine synthesis; Nonsense Mediated Decay (NMD) enhanced by the Exon Junction Complex (EJC); GTP hydrolysis and joining of the 60S ribosomal subunit; Major path…	Cytoplasmic Ribosomal Proteins	53023	54414.7	39627.2	16457.5	28512.7	26554	24200.4	26996.7	23511.6	24304.3	35836.4	42006.8	39516.9	60941.1	36034.8	36399.1	66724.7	54765.4	Peak Found	High	High	High	High	High	High	High	High	High
High	P26599	Polypyrimidine tract-binding protein 1 [OS=Homo sapiens]	5	2	14	2	531	57.2	9.17	21.26	metabolic process;regulation of biological process;response to stimulus	membrane;nucleus	protein binding;RNA binding	Pf00076, Pf13893, Pf14259	5725	ENSG00000011304.19	PTBP1	19		mRNA Splicing - Major Pathway; FGFR2 alternative splicing	mir-124 predicted interactions with cell cycle and differentiation; mRNA Processing	52230.6	41379.5	50404.1	18861.1	21758.7	24638.9	26887.8	31156.1	24106.4	34378	32460	34199.5	50180.5	54913.9	45949.9	53604.1	50075.3	54056.8	Peak Found	High	Peak Found	High	High	High	High	High	High	High
High	Q9GZN8	UPF0687 protein C20orf27 [OS=Homo sapiens]	6	1	9	1	174	19.3	6.84	17.77				Pf15006	54976	ENSG00000101220.17	C20orf27	20				2732.72	14644.7	11303.5	7199.69	7009.91	9492.28	8756.11	5659.3	6751.46	8452.87	9089.48	5210.94	25609.6	18045.1	33174.4	13531.6	19474.8	13385.7	Not Found	Peak Found	Peak Found	High	High	High	Peak Found	High	High	Peak Found
High	P04406-1	glyceraldehyde-3-phosphate dehydrogenase [OS=Homo sapiens]	35	13	182	13	335	36	8.46	314.38	cell death;cell organization and biogenesis;defense response;metabolic process;regulation of biological process;response to stimulus	cytoplasm;cytoskeleton;cytosol;membrane;nucleus	catalytic activity;enzyme regulator activity;nucleotide binding;protein binding	Pf00044, Pf02800	2597	ENSG00000111640.14	GAPDH	12	HIF-1 signaling pathway; Carbon metabolism; Alzheimer's disease; Glycolysis / Gluconeogenesis; Biosynthesis of amino acids; Metabolic pathways	Gluconeogenesis; Glycolysis	Cori Cycle; Alzheimers Disease; Glycolysis and Gluconeogenesis; Sudden Infant Death Syndrome (SIDS) Susceptibility Pathways	232377	213621	200525	146421	178129	201149	170870	201002	204205	136948	171536	163915	284602	316391	255791	202179	264821	280622	High	High	High	High	High	High	High	High	High	High
High	P47756-1	F-actin-capping protein subunit beta [OS=Homo sapiens]	4	1	16	1	277	31.3	5.59	35.89	cell organization and biogenesis;cellular component movement;coagulation;regulation of biological process;transport	cytoplasm;cytoskeleton;cytosol	protein binding	Pf01115	832	ENSG00000077549.17	CAPZB	1	Endocytosis	COPI-independent Golgi-to-ER retrograde traffic; COPI-mediated anterograde transport; MHC class II antigen presentation; HSP90 chaperone cycle for steroid hormone receptors (SHR); Factors involved in megakaryocyte development and platelet production		18579.6	19284	18154.4	14833	15666.8	17238.1	16603.7	14401.5	17475.1	15628.4	16105.1	17419.1	23873.5	24803	15403	22514.9	26193.5	26628.1	Peak Found	High	High	Peak Found	High	High	High	High	High	High
High	P06756	Integrin alpha-V [OS=Homo sapiens]	1	1	8	1	1048	116	5.68	23.26	cell differentiation;cell growth;cell organization and biogenesis;cellular component movement;cellular homeostasis;metabolic process;regulation of biological process;response to stimulus;transport	cell surface;cytosol;membrane	metal ion binding;protein binding;receptor activity;signal transducer activity;transporter activity	Pf01839, Pf08441, Pf13517	3685	ENSG00000138448.11	ITGAV	2	Arrhythmogenic right ventricular cardiomyopathy (ARVC); Dilated cardiomyopathy; Cell adhesion molecules (CAMs); Pathways in cancer; Thyroid hormone signaling pathway; Phagosome; Focal adhesion; Proteoglycans in cancer; Regulation of actin cytoskeleton; Small cell lung cancer; ECM-receptor interaction; PI3K-Akt signaling pathway; Hypertrophic cardiomyopathy (HCM)	Integrin cell surface interactions; Signal transduction by L1; PECAM1 interactions; Cross-presentation of particulate exogenous antigens (phagosomes); VEGFA-VEGFR2 Pathway; Molecules associated with elastic fibres; Syndecan interactions; ECM proteoglycans; Laminin interactions; Neutrophil degranulation	Osteopontin Signaling; Integrin-mediated Cell Adhesion; Arrhythmogenic Right Ventricular Cardiomyopathy; Primary Focal Segmental Glomerulosclerosis FSGS; Focal Adhesion; Osteoblast Signaling; MFAP5-mediated ovarian cancer cell motility and invasiveness; VEGFA-VEGFR2 Signaling Pathway; Focal Adhesion-PI3K-Akt-mTOR-signaling pathway	3281.65	12557.4	21447.5	3701.11	8804.87	6614.91	2684.1	7596.36	5521.03	3089.18	2355.23	2318.73	1824.12	10623.5	16714	1741.62	3866.25	13580.5	Not Found	High	High	Peak Found	High	High	Not Found	High	High	Not Found
High	P40429	60S ribosomal protein L13a [OS=Homo sapiens]	12	2	5	2	203	23.6	10.93	12.5	cell organization and biogenesis;metabolic process;regulation of biological process;response to stimulus;transport	cytoplasm;cytosol;membrane;nucleus;ribosome	RNA binding;structural molecule activity	Pf00572	23521	ENSG00000142541.16	RPL13A	19	Ribosome	Peptide chain elongation; Eukaryotic Translation Termination; Viral mRNA Translation; L13a-mediated translational silencing of Ceruloplasmin expression; Nonsense Mediated Decay (NMD) independent of the Exon Junction Complex (EJC); Selenocysteine synthesis; Nonsense Mediated Decay (NMD) enhanced by the Exon Junction Complex (EJC); GTP hydrolysis and joining of the 60S ribosomal subunit; Major path…	Cytoplasmic Ribosomal Proteins	7069.63	5796.25	6149.52	7153.4	8485.32	8694.4	7692.08	8535.88	5414.98	7337.41	5979.72	4607.43	5417.58	13171.9	8147.17	6180.41	13643.4	10321	Not Found	Not Found	Not Found	Not Found	High	High	Not Found	High	Peak Found	Not Found
High	Q6YHK3-1	CD109 antigen [OS=Homo sapiens]	0	1	6	1	1445	161.6	5.85	8.51	metabolic process;regulation of biological process;transport	cell surface;extracellular;membrane	enzyme regulator activity;protein binding	Pf00207, Pf01835, Pf07677, Pf07678, Pf07703, Pf10569, Pf11974, Pf13249	135228	ENSG00000156535.13	CD109	6		Platelet degranulation ; Post-translational modification: synthesis of GPI-anchored proteins		3262.82	14795.3	18014.7	3881.34	6984.85	7444.58	7612.21	7716.56	7048.65	2596.41	1934.78	1961.85	15572.6	17623.6	15240.4	3447.29	4170.68	2990.14	Not Found	High	Peak Found	Peak Found	High	High	Peak Found	Peak Found	High	Not Found
High	P46779	60S ribosomal protein L28 [OS=Homo sapiens]	9	1	3	1	137	15.7	12.02	6.33	cell organization and biogenesis;metabolic process;regulation of biological process;transport	cytosol;membrane;ribosome	protein binding;RNA binding;structural molecule activity	Pf01778	6158	ENSG00000108107.14	RPL28	19	Ribosome	Peptide chain elongation; Eukaryotic Translation Termination; Viral mRNA Translation; L13a-mediated translational silencing of Ceruloplasmin expression; Nonsense Mediated Decay (NMD) independent of the Exon Junction Complex (EJC); Selenocysteine synthesis; Nonsense Mediated Decay (NMD) enhanced by the Exon Junction Complex (EJC); GTP hydrolysis and joining of the 60S ribosomal subunit; Major path…	Cytoplasmic Ribosomal Proteins	3598.1	1916.76	2286.63	7947.48	5453.87	8749.48	10794.1	7705.33	8764.99	4480.26	2145.24	6396.87	11284	12823.4	3597.52	3102.16	9488.29	7942.52	Not Found	Not Found	Not Found	Peak Found	Peak Found	High	Peak Found	High	High	Peak Found
High	P04075	fructose-bisphosphate aldolase A [OS=Homo sapiens]	21	6	68	6	364	39.4	8.09	218.67	cell organization and biogenesis;cellular homeostasis;metabolic process;regulation of biological process;transport	cytoplasm;cytoskeleton;cytosol;extracellular;membrane;nucleus;organelle lumen	catalytic activity;protein binding;RNA binding	Pf00274	226	ENSG00000149925.17	ALDOA	16	HIF-1 signaling pathway; Carbon metabolism; Fructose and mannose metabolism; Pentose phosphate pathway; Glycolysis / Gluconeogenesis; Biosynthesis of amino acids; Metabolic pathways	Platelet degranulation ; Gluconeogenesis; Glycolysis; Neutrophil degranulation	Glycolysis and Gluconeogenesis; Sudden Infant Death Syndrome (SIDS) Susceptibility Pathways	125116	166367	190464	86010.7	119527	135950	93141.9	125427	123034	90067.7	123128	100626	198923	225400	161627	143897	234887	190067	High	High	High	High	High	High	High	High	High	High
High	Q13753-1	Laminin subunit gamma-2 [OS=Homo sapiens]	4	3	7	3	1193	130.9	6.19	21.21	cell organization and biogenesis;metabolic process;regulation of biological process	extracellular;membrane	catalytic activity;motor activity	Pf00052, Pf00053, Pf01576, Pf05262, Pf05557, Pf08429, Pf12128, Pf13514	3918	ENSG00000058085.14	LAMC2	1	Amoebiasis; Pathways in cancer; Toxoplasmosis; Focal adhesion; Small cell lung cancer; ECM-receptor interaction; PI3K-Akt signaling pathway	Laminin interactions; Degradation of the extracellular matrix; MET activates PTK2 signaling; Type I hemidesmosome assembly; Anchoring fibril formation; Non-integrin membrane-ECM interactions	Alpha 6 Beta 4 signaling pathway; Focal Adhesion; Focal Adhesion-PI3K-Akt-mTOR-signaling pathway; Inflammatory Response Pathway	7605.56	8188.36	18975.5	7121.22	11308.8	12429.6	4484.11	13830.8	14425.6	6739.96	7444.71	6375.93	6090.58	21458.8	23200.6	5070.7	12889.2	16451.3	Not Found	Not Found	Peak Found	Not Found	Peak Found	High	Not Found	High	High	Not Found
High	Q99536	Synaptic vesicle membrane protein VAT-1 homolog [OS=Homo sapiens]	3	1	5	1	393	41.9	6.29	11.29	metabolic process;regulation of biological process;transport	cytoplasm;extracellular;membrane;mitochondrion;organelle lumen	catalytic activity;metal ion binding	Pf00107, Pf08240, Pf13602	10493	ENSG00000108828.15	VAT1	17		Neutrophil degranulation		1752.68	3569.89	5672.7	3875.15	6556.75	6024.04	5827.93	4684.63	5122.28	5492.5	4137.75	2635.84	8908.27	9789.49	8997.15	3321.67	7923.04	9741.59	Not Found	Not Found	Peak Found	Peak Found	High	High	Peak Found	High	High	Peak Found
High	P15529-1	Membrane cofactor protein [OS=Homo sapiens]	2	1	6	1	392	43.7	6.74	12.72	defense response;metabolic process;regulation of biological process;response to stimulus	cell surface;cytoplasm;Golgi;membrane	catalytic activity;enzyme regulator activity;protein binding;receptor activity	Pf00084	4179	ENSG00000117335.19	CD46	1	Complement and coagulation cascades; Measles	Regulation of Complement cascade	Complement and Coagulation Cascades	122102	96459.4	77181.6	43099.5	41498.6	41537.3	59169.7	49562.6	53177	19944.9	16034.4	19668.5	126183	107949	68587.3	44154.7	37688.3	33524	Peak Found	High	High	Peak Found	High	Peak Found	Peak Found	Peak Found	Peak Found	Peak Found
High	P11498	pyruvate carboxylase, mitochondrial [OS=Homo sapiens]	2	4	1287	4	1178	129.6	6.84	4271.55	metabolic process;regulation of biological process	cytoplasm;cytosol;mitochondrion;organelle lumen	catalytic activity;metal ion binding;nucleotide binding;protein binding	Pf00289, Pf00364, Pf00682, Pf02222, Pf02436, Pf02785, Pf02786, Pf07478, Pf08443, Pf13533, Pf13535, Pf15632	5091	ENSG00000173599.13	PC	11	Citrate cycle (TCA cycle); Carbon metabolism; Pyruvate metabolism; Biosynthesis of amino acids; Metabolic pathways	Gluconeogenesis; Biotin transport and metabolism; Defective HLCS causes multiple carboxylase deficiency	Alanine and aspartate metabolism; TCA Cycle and Deficiency of Pyruvate Dehydrogenase complex (PDHc); Fatty Acid Biosynthesis; Amino Acid metabolism; Glycolysis and Gluconeogenesis	1.57335e+07	1.42052e+07	1.60433e+07	8.76371e+06	4.87857e+06	3.75226e+06	6.10573e+06	5.15588e+06	4.81571e+06	6.8892e+06	6.59552e+06	9.02355e+06	6.57735e+06	9.10583e+06	1.49274e+07	1.43991e+07	1.13952e+07	1.32882e+07	High	High	High	High	High	High	High	High	High	High
High	P17301	Integrin alpha-2 [OS=Homo sapiens]	3	3	20	3	1181	129.2	5.31	39.43	cell differentiation;cell organization and biogenesis;cell proliferation;cellular component movement;coagulation;regulation of biological process;response to stimulus	cell surface;membrane;nucleus	metal ion binding;protein binding;receptor activity;signal transducer activity	Pf00092, Pf01839, Pf08441, Pf13517, Pf13519	3673		ITGA2	5	Arrhythmogenic right ventricular cardiomyopathy (ARVC); Dilated cardiomyopathy; Hematopoietic cell lineage; Pathways in cancer; Phagosome; Focal adhesion; Proteoglycans in cancer; Regulation of actin cytoskeleton; Small cell lung cancer; ECM-receptor interaction; PI3K-Akt signaling pathway; Hypertrophic cardiomyopathy (HCM); Platelet activation	ECM proteoglycans; CHL1 interactions; Integrin cell surface interactions; Laminin interactions; MET activates PTK2 signaling; Platelet Adhesion to exposed collagen; Syndecan interactions	Integrin-mediated Cell Adhesion; Arrhythmogenic Right Ventricular Cardiomyopathy; Interleukin-11 Signaling Pathway; Focal Adhesion; TGF-beta Signaling Pathway	112167	74591.4	64878.5	42292.9	32751.7	41201.6	56206.8	37095.8	44413.6	23160.4	17298.6	13995.6	104419	90517.6	58275.8	30721.9	37731.2	33534	High	High	High	High	High	High	High	High	High	High
High	Q13740-1	CD166 antigen [OS=Homo sapiens]	4	2	22	2	583	65.1	6.25	57.87	cell growth;cellular component movement;regulation of biological process;response to stimulus	extracellular;membrane	protein binding	Pf07679, Pf08205, Pf13895, Pf13927	214	ENSG00000170017.12	ALCAM	3	Cell adhesion molecules (CAMs)	L1CAM interactions		163896	22198.9	22814.5	61836.8	68676	74494.4	104772	115693	86404.8	23432	5814.56	6204.27	195003	170923	27462	65366.6	12282	12913.3	High	High	High	High	High	High	High	High	High	High
High	P29401	Transketolase [OS=Homo sapiens]	27	16	165	16	623	67.8	7.66	366.38	metabolic process;regulation of biological process	cytosol	catalytic activity;metal ion binding;protein binding	Pf00456, Pf00676, Pf02775, Pf02779, Pf02780, Pf09364	7086	ENSG00000163931.15	TKT	3	Carbon metabolism; Pentose phosphate pathway; Biosynthesis of amino acids; Metabolic pathways	Insulin effects increased synthesis of Xylulose-5-Phosphate; Pentose phosphate pathway (hexose monophosphate shunt)	Pentose Phosphate Pathway	567849	504728	518773	272915	252633	283755	258150	259519	267752	233691	248395	238399	812249	724550	568767	399456	524716	507538	High	High	High	High	High	High	High	High	High	High
High	Q15424-1	Scaffold attachment factor B1 [OS=Homo sapiens]	1	1	10	1	915	102.6	5.47	25.4	cell organization and biogenesis;metabolic process;regulation of biological process;response to stimulus	nucleus	DNA binding;protein binding;RNA binding	Pf00076, Pf02037, Pf13893, Pf14259	6294	ENSG00000160633.12	SAFB	19			Structural Pathway of Interleukin 1 (IL-1)	2397.29	16500	16595.5	9721.94	10825.2	14354.5	11847.5	11124.8	10603.1	11910	9135.8	12013.8	15920	32100.2	23791.2	15057.4	25458.3	29708.6	Not Found	High	Peak Found	Peak Found	Peak Found	Peak Found	High	High	High	High
High	Q14847	LIM and SH3 domain protein 1 [OS=Homo sapiens]	6	1	6	1	261	29.7	7.05	9.95	regulation of biological process;transport	cytoplasm;cytoskeleton	metal ion binding;protein binding;transporter activity	Pf00018, Pf00412, Pf00880, Pf07653, Pf14604	3927	ENSG00000002834.17	LASP1	17				30898.6	25440.7	24638.8	4357.06	12804.6	12570.2	8813.31	13129.1	13651.7	9937.37	15367.3	20249.7	18855.2	26837.6	26824.5	23184.9	37084.9	35721.8	Peak Found	Peak Found	Peak Found	Peak Found	High	High	Peak Found	High	High	Peak Found
High	P35221	Catenin alpha-1 [OS=Homo sapiens]	1	1	1	1	906	100	6.29	2.52	cell organization and biogenesis;regulation of biological process;response to stimulus	cytoplasm;cytoskeleton;cytosol;Golgi;membrane	protein binding;RNA binding;structural molecule activity	Pf01044	1495	ENSG00000044115.20	CTNNA1	5	Arrhythmogenic right ventricular cardiomyopathy (ARVC); Tight junction; Hippo signaling pathway; Endometrial cancer; Pathways in cancer; Adherens junction; Leukocyte transendothelial migration; Bacterial invasion of epithelial cells	Adherens junctions interactions; CDO in myogenesis; VEGFR2 mediated vascular permeability; RHO GTPases activate IQGAPs	Arrhythmogenic Right Ventricular Cardiomyopathy; Apoptosis-related network due to altered Notch3 in ovarian cancer; VEGFA-VEGFR2 Signaling Pathway; White fat cell differentiation	16362	10698	10693.7	6200.94	7126.44	8455.28	2359.91	8823.37	8126.83	5856.54	6925.09	6118.64	12824.1	20763.2	12348.8	2090.92	14860.5	15319.2	Peak Found	Peak Found	Peak Found	Peak Found	Peak Found	High	Not Found	Peak Found	Peak Found	Peak Found
High	P26006	Integrin alpha-3 [OS=Homo sapiens]	5	4	70	4	1051	116.5	6.77	193.59	cell differentiation;cell organization and biogenesis;cellular component movement;regulation of biological process;response to stimulus	cell surface;membrane	metal ion binding;protein binding	Pf01839, Pf08441, Pf13517	3675	ENSG00000005884.17	ITGA3	17	Arrhythmogenic right ventricular cardiomyopathy (ARVC); Dilated cardiomyopathy; Hematopoietic cell lineage; Pathways in cancer; Focal adhesion; Regulation of actin cytoskeleton; Small cell lung cancer; ECM-receptor interaction; PI3K-Akt signaling pathway; Hypertrophic cardiomyopathy (HCM)	Integrin cell surface interactions; Laminin interactions; Basigin interactions; MET activates PTK2 signaling	Integrin-mediated Cell Adhesion; Arrhythmogenic Right Ventricular Cardiomyopathy; Primary Focal Segmental Glomerulosclerosis FSGS; Focal Adhesion; Focal Adhesion-PI3K-Akt-mTOR-signaling pathway	243165	227328	232401	88741.1	106057	123507	144204	136544	124426	39748.5	40115.7	51403.3	293813	285456	205680	98892.7	100052	95210.2	High	High	High	High	High	High	High	High	High	High
High	Q99623	Prohibitin-2 [OS=Homo sapiens]	3	1	4	1	299	33.3	9.83	3.53	cell organization and biogenesis;metabolic process;regulation of biological process;response to stimulus;transport	cell surface;cytoplasm;membrane;mitochondrion;nucleus	protein binding	Pf01145	11331	ENSG00000215021.8	PHB2	12		Processing of SMDT1		17811	19670.8	18457.1	10238.1	8455.6	12743.6	21389.6	13264.2	14977.4	6103.18	4244.88	4604.82	31675.5	24309	17692.6	11558.3	12609.3	10239.7	Peak Found	Peak Found	Peak Found	Peak Found	Peak Found	High	High	High	High	Peak Found
High	P21926	CD9 antigen [OS=Homo sapiens]	7	2	32	2	228	25.4	7.15	70.76	cell organization and biogenesis;cellular component movement;metabolic process;regulation of biological process;response to stimulus;transport	cell surface;membrane	protein binding	Pf00335	928	ENSG00000010278.12	CD9	12	Hematopoietic cell lineage	Platelet degranulation ; Sperm:Oocyte Membrane Binding; Uptake and function of diphtheria toxin		120983	111200	104960	47301.4	48134.6	63916	72842.8	70577.7	68899	21633	21333.7	18933.6	152483	127023	104099	54455.5	53261.2	56936.5	High	High	High	High	High	High	High	High	High	High
High	P13726-1	tissue factor [OS=Homo sapiens]	10	2	37	2	295	33	7.03	84.4	coagulation;metabolic process;regulation of biological process;response to stimulus	cell surface;extracellular;membrane	catalytic activity;protein binding;receptor activity;signal transducer activity	Pf01108, Pf09294	2152	ENSG00000117525.13	F3	1	AGE-RAGE signaling pathway in diabetic complications; Complement and coagulation cascades	Extrinsic Pathway of Fibrin Clot Formation	VEGFA-VEGFR2 Signaling Pathway; Complement and Coagulation Cascades	81783.4	94295.2	83517.7	34810.1	35007.4	39419.1	45240.7	34954.6	40569.1	17990.9	14165.2	18374.8	128720	94939.2	73841.4	46495.6	50126.2	37769.4	Peak Found	High	High	High	High	High	High	High	High	Peak Found
High	P10809	60 kDa heat shock protein, mitochondrial [OS=Homo sapiens]	10	4	29	4	573	61	5.87	66.91	cell organization and biogenesis;cell proliferation;metabolic process;regulation of biological process;response to stimulus;transport	cell surface;cytoplasm;cytosol;endosome;membrane;mitochondrion;organelle lumen	catalytic activity;DNA binding;nucleotide binding;protein binding;RNA binding	Pf00118	3329	ENSG00000144381.16	HSPD1	2	Type I diabetes mellitus; Tuberculosis; RNA degradation; Legionellosis	TFAP2A acts as a transcriptional repressor during retinoic acid induced cell differentiation; Mitochondrial protein import; Metabolism of proteins	Apoptosis-related network due to altered Notch3 in ovarian cancer; Sudden Infant Death Syndrome (SIDS) Susceptibility Pathways	55425.6	73362.9	82670.3	28298.4	34701.4	41502	29468	31342.6	34622.3	26412.4	30317.6	32257.7	131925	113830	81006.8	82914.5	108495	78906.7	High	High	High	High	High	High	Peak Found	High	High	Peak Found
High	P05556-1	Integrin beta-1 [OS=Homo sapiens]	4	3	25	3	798	88.4	5.39	65.24	cell differentiation;cell growth;cell organization and biogenesis;cellular component movement;defense response;metabolic process;regulation of biological process;response to stimulus;transport	cell surface;cytoplasm;endosome;membrane	enzyme regulator activity;metal ion binding;protein binding;receptor activity;signal transducer activity	Pf00362, Pf07965, Pf08725	3688	ENSG00000150093.18	ITGB1	10	Arrhythmogenic right ventricular cardiomyopathy (ARVC); Pathogenic Escherichia coli infection; Dilated cardiomyopathy; Leishmaniasis; Rap1 signaling pathway; Cell adhesion molecules (CAMs); Pathways in cancer; Pertussis; Toxoplasmosis; Phagosome; Focal adhesion; Proteoglycans in cancer; Regulation of actin cytoskeleton; Leukocyte transendothelial migration; Bacterial invasion of epithelial cells;…	Integrin cell surface interactions; Signal transduction by L1; Basigin interactions; MET activates PTK2 signaling; Molecules associated with elastic fibres; Platelet Adhesion to exposed collagen; Syndecan interactions; CHL1 interactions; ECM proteoglycans; Laminin interactions; Localization of the PINCH-ILK-PARVIN complex to focal adhesions; Immunoregulatory interactions between a Lymphoid and a …	Integrin-mediated Cell Adhesion; Prolactin Signaling Pathway; Neural Crest Differentiation; Arrhythmogenic Right Ventricular Cardiomyopathy; Pathogenic Escherichia coli infection; Primary Focal Segmental Glomerulosclerosis FSGS; Focal Adhesion; Signaling of Hepatocyte Growth Factor Receptor; Rac1/Pak1/p38/MMP-2 pathway; TGF-beta Signaling Pathway; Factors and pathways affecting insulin-like growt…	44091.7	63623.4	59108.6	19434	32248.9	33681.6	28350.3	38622.7	34464.8	12359	10791.3	9407.63	72585.4	74613.9	60631	26069.8	36364	29719.2	High	High	High	High	High	High	High	High	High	Peak Found
High	O75663	TIP41-like protein [OS=Homo sapiens]	4	1	17	1	272	31.4	5.91	37.78	regulation of biological process;response to stimulus	cytoplasm	protein binding	Pf04176	261726	ENSG00000143155.12	TIPRL	1				31604.6	32629.5	27691.9	14128.5	16565.2	19527.6	19847.3	17773.8	15790.9	22524.3	15518.8	10833	44896.5	43097.7	31317.6	43279.6	48111.5	38017.4	High	High	High	High	High	High	High	High	High	High
High	Q9H0G5	Nuclear speckle splicing regulatory protein 1 [OS=Homo sapiens]	6	3	5	3	558	66.4	8.84	5.77	metabolic process;regulation of biological process;transport	nucleus	protein binding;RNA binding	Pf09745	84081	ENSG00000126653.17	NSRP1	17				10580.5	11439.3	20113.4	9066.18	8388.39	9721.96	7304.49	6106.13	8862.31	8717.78	10381	12383	22511.4	53248.1	63803.8	10271	29207.8	66122.6	Not Found	Not Found	Peak Found	Not Found	Not Found	Not Found	Not Found	Peak Found	Not Found	Not Found
High	P04040	catalase [OS=Homo sapiens]	2	1	24	1	527	59.7	7.39	67.06	cell differentiation;cell organization and biogenesis;metabolic process;regulation of biological process;response to stimulus;transport	cytosol;endoplasmic reticulum;extracellular;Golgi;membrane;mitochondrion;organelle lumen;vacuole	antioxidant activity;catalytic activity;metal ion binding;nucleotide binding;protein binding	Pf00199, Pf06628	847	ENSG00000121691.4	CAT	11	Peroxisome; Longevity regulating pathway - multiple species; Carbon metabolism; FoxO signaling pathway; Amyotrophic lateral sclerosis (ALS); Glyoxylate and dicarboxylate metabolism; Tryptophan metabolism; Longevity regulating pathway	Neutrophil degranulation; Detoxification of Reactive Oxygen Species	Selenium Micronutrient Network; Folate Metabolism; Amyotrophic lateral sclerosis (ALS); Oxidative Stress; Tryptophan metabolism; DNA Damage Response (only ATM dependent)	443622	489327	434684	226859	280521	344167	275865	276972	282125	128476	110496	103265	801684	730337	540889	293478	422174	312908	High	High	High	High	High	High	High	High	High	High
High	Q86XP3-1	ATP-dependent RNA helicase DDX42 [OS=Homo sapiens]	4	3	38	3	938	102.9	7.02	107.67	metabolic process;regulation of biological process	cytoplasm;cytosol;membrane;nucleus	catalytic activity;nucleotide binding;protein binding;RNA binding	Pf00270, Pf00271, Pf13307	11325	ENSG00000198231.12	DDX42	17	Spliceosome	mRNA Splicing - Major Pathway; mRNA Splicing - Minor Pathway		112898	123908	154485	62397.1	86232.9	90062.1	45233	91100.6	85652.4	56743.3	77767.8	65528.6	175646	215530	199282	137150	193118	246784	High	High	High	High	High	High	High	High	High	High
High	Q12906-1	Interleukin enhancer-binding factor 3 [OS=Homo sapiens]	6	3	34	3	894	95.3	8.76	99.76	defense response;metabolic process;regulation of biological process;response to stimulus	cytoplasm;extracellular;membrane;mitochondrion;nucleus	DNA binding;protein binding;RNA binding	Pf00035, Pf07528, Pf14709	3609	ENSG00000129351.17	ILF3	19				8283.05	38001.8	71614.8	31271.5	50609.1	61131.2	16009.3	58448.7	42861.1	31056.9	47596.8	32162.3	25998.1	47386.7	90444.4	43794.9	96308.1	103418	Not Found	Peak Found	Peak Found	High	High	High	Peak Found	High	High	Peak Found
High	P50991	T-complex protein 1 subunit delta [OS=Homo sapiens]	3	1	14	1	539	57.9	7.83	38.32	metabolic process;regulation of biological process;transport	cytoplasm;cytoskeleton;cytosol	nucleotide binding;protein binding;RNA binding	Pf00118	10575	ENSG00000115484.14	CCT4	2		BBSome-mediated cargo-targeting to cilium; Prefoldin mediated transfer of substrate to CCT/TriC; Cooperation of PDCL (PhLP1) and TRiC/CCT in G-protein beta folding; Association of TriC/CCT with target proteins during biosynthesis; Formation of tubulin folding intermediates by CCT/TriC; Folding of actin by CCT/TriC		28401.8	34360.8	38913.2	16813.2	21654.2	24126.3	13319.5	21990.5	17061.3	12062.9	15960.8	16819.8	53090.4	49491.9	40098.4	24506.4	47919	47974	Peak Found	High	High	Peak Found	High	High	High	High	High	High
High	Q96KP4	cytosolic non-specific dipeptidase [OS=Homo sapiens]	3	1	8	1	475	52.8	5.97	13.14	metabolic process	cytoplasm;cytosol	catalytic activity;metal ion binding	Pf01546, Pf07687	55748	ENSG00000133313.14	CNDP2	18	Histidine metabolism; beta-Alanine metabolism; Metabolic pathways; Arginine and proline metabolism	Glutathione synthesis and recycling		23159.5	10928.4	13163.4	6538.54	8566.11	5116.55	11018.6	8447.21	7955.62	6049.08	4349.67	5974.18	19704.1	11038.9	18379.6	15082.6	24588.4	18745.7	Peak Found	High	High	Not Found	High	Not Found	Peak Found	Not Found	Not Found	Peak Found
High	P13010	X-ray repair cross-complementing protein 5 [OS=Homo sapiens]	2	1	13	1	732	82.7	5.81	33.1	cell differentiation;cell organization and biogenesis;cell proliferation;defense response;metabolic process;regulation of biological process;response to stimulus;transport	chromosome;cytoplasm;cytosol;extracellular;membrane;nucleus;organelle lumen	catalytic activity;DNA binding;enzyme regulator activity;nucleotide binding;protein binding;RNA binding	Pf02735, Pf03730, Pf03731, Pf08785	7520	ENSG00000079246.15	XRCC5	2	Non-homologous end-joining	2-LTR circle formation; Neutrophil degranulation; IRF3-mediated induction of type I IFN; Nonhomologous End-Joining (NHEJ)	Non-homologous end joining	2328.55	29209.4	28113.7	8293.62	19388.7	19022.3	10095.6	18447.2	13893.2	13385.8	18228.6	7863.5	30451.4	4377.49	34802.9	28290.5	46127.2	42880.8	High	High	High	Peak Found	High	High	High	High	High	Peak Found
High	Q15084-1	Protein disulfide-isomerase A6 [OS=Homo sapiens]	10	4	71	4	440	48.1	5.08	158.24	cellular homeostasis;metabolic process;regulation of biological process;response to stimulus;transport	cytosol;endoplasmic reticulum;membrane;organelle lumen	catalytic activity;protein binding	Pf00085, Pf13098, Pf13848, Pf13899, Pf13905	10130	ENSG00000143870.12	PDIA6	2	Protein processing in endoplasmic reticulum	Post-translational protein phosphorylation; Regulation of Insulin-like Growth Factor (IGF) transport and uptake by Insulin-like Growth Factor Binding Proteins (IGFBPs); XBP1(S) activates chaperone genes	Photodynamic therapy-induced unfolded protein response	232870	207150	202588	73576.4	89362.5	90407.6	83600.1	71613.5	80737.7	87989.2	87574.5	75272.4	319240	239967	236118	262760	301238	284498	High	High	High	High	High	High	High	High	High	High
High	Q15019	septin-2 [OS=Homo sapiens]	9	2	15	2	361	41.5	6.6	42.45	cell differentiation;cell division;cell organization and biogenesis;regulation of biological process;response to stimulus	chromosome;cytoplasm;cytoskeleton;cytosol;membrane;nucleus	nucleotide binding;protein binding	Pf00071, Pf00735, Pf01926	4735	ENSG00000168385.17	SEPT2	2	Bacterial invasion of epithelial cells	Anchoring of the basal body to the plasma membrane		36572.6	56228.8	53813.2	18312.5	25696.5	33460.4	22278.5	25759.9	21465.9	21675.7	27088.8	21373.2	39899.3	71617.7	60114.6	48544.7	73386.4	71594.1	High	Peak Found	High	High	Peak Found	High	High	Peak Found	High	High
High	P22234	multifunctional protein ADE2 [OS=Homo sapiens]	3	1	4	1	425	47	7.23	9.2	metabolic process	cytoplasm;cytosol;membrane	catalytic activity;nucleotide binding;protein binding	Pf00731, Pf01259	10606	ENSG00000128050.8	PAICS	4	Purine metabolism; Metabolic pathways	Purine ribonucleoside monophosphate biosynthesis		3647.76	2575.24	11813.8	1725.27	4332.39	3540.65	3821.88	3914.94	4417.14	2887.92	2463.01	3576.32	4459.9	12326.3	10932.5	4332.89	19296.4	10020.6	Not Found	Not Found	High	Not Found	Not Found	Peak Found	Not Found	Peak Found	Not Found	Not Found
High	P26196	Probable ATP-dependent RNA helicase DDX6 [OS=Homo sapiens]	2	1	8	1	483	54.4	8.66	6.81	cell organization and biogenesis;metabolic process;regulation of biological process	cytoplasm;cytosol;membrane;mitochondrion;nucleus	catalytic activity;nucleotide binding;protein binding;RNA binding	Pf00270, Pf00271, Pf14617	1656	ENSG00000110367.11	DDX6	11	RNA degradation	mRNA decay by 5' to 3' exoribonuclease		13648.9	15096	10991.6	6857.76	6610.77	7610.53	4893.71	9144.11	10167.6	5355.66	3331.86	7290.02	27440.3	24136.8	13899	13502.5	23326.1	18980.1	Peak Found	Peak Found	High	Peak Found	Peak Found	High	Peak Found	High	Peak Found	Peak Found
High	P61247	40S ribosomal protein S3a [OS=Homo sapiens]	3	1	7	1	264	29.9	9.73	7.98	cell differentiation;cell organization and biogenesis;metabolic process;regulation of biological process;transport	cytoplasm;cytosol;endoplasmic reticulum;nucleus;ribosome	protein binding;RNA binding;structural molecule activity	Pf01015	6189	ENSG00000145425.9	RPS3A	4	Ribosome	Peptide chain elongation; Eukaryotic Translation Termination; Viral mRNA Translation; Formation of the ternary complex, and subsequently, the 43S complex; L13a-mediated translational silencing of Ceruloplasmin expression; Selenocysteine synthesis; Nonsense Mediated Decay (NMD) independent of the Exon Junction Complex (EJC); Nonsense Mediated Decay (NMD) enhanced by the Exon Junction Complex (EJC)…	Cytoplasmic Ribosomal Proteins	28813.3	30183.1	23841.7	3585.35	6126.12	10539	4393.27	6129.77	9793.51	7840.43	9399.81	9095.81	33651	35647.8	24045.7	18356.1	32309.2	33261.9	Peak Found	Peak Found	High	Not Found	High	High	Not Found	Peak Found	Peak Found	Peak Found
High	P62917	60S ribosomal protein L8 [OS=Homo sapiens]	4	1	20	1	257	28	11.03	44.58	cell organization and biogenesis;metabolic process;response to stimulus;transport	cytoplasm;cytosol;membrane;ribosome	RNA binding;structural molecule activity	Pf00181, Pf03947	6132	ENSG00000161016.17	RPL8	8	Ribosome	Peptide chain elongation; Eukaryotic Translation Termination; Viral mRNA Translation; L13a-mediated translational silencing of Ceruloplasmin expression; Nonsense Mediated Decay (NMD) independent of the Exon Junction Complex (EJC); Selenocysteine synthesis; Nonsense Mediated Decay (NMD) enhanced by the Exon Junction Complex (EJC); GTP hydrolysis and joining of the 60S ribosomal subunit; Major path…	Cytoplasmic Ribosomal Proteins	46042.3	49025.6	31558.5	8584.13	7548.72	8920.02	10572.2	8502.89	10245.4	10125.1	9348.75	8896.07	46258.1	44365.4	40072.9	28839.7	46803.6	33378.4	High	High	High	High	High	High	Peak Found	High	High	High
High	Q4G148-1	Glucoside xylosyltransferase 1 [OS=Homo sapiens]	2	1	1	1	440	50.5	8.65	1.94	metabolic process	membrane	catalytic activity	Pf01501	283464	ENSG00000151233.10	GXYLT1	12	Other types of O-glycan biosynthesis			2167.92	7953.94	6139.84	2821.36	2245.99	3764.82	3631.5	1979.57	3464.91	3257.08	3825.18	1998.02	4423.43	5902.16	8892.47	1760.04	15446.8	11876.6	Not Found	Peak Found	Peak Found	Not Found	Not Found	Not Found	Not Found	Not Found	Not Found	Not Found
High	Q00839	Heterogeneous nuclear ribonucleoprotein U [OS=Homo sapiens]	6	3	26	3	825	90.5	6	55.58	cell differentiation;metabolic process;regulation of biological process;response to stimulus	cell surface;chromosome;cytoplasm;membrane;nucleus;spliceosomal complex	DNA binding;nucleotide binding;protein binding;RNA binding	Pf00622, Pf13671	3192	ENSG00000153187.18	HNRNPU	1	Spliceosome	mRNA Splicing - Major Pathway	mRNA Processing	8011.75	34095.2	36375.7	7435.9	10189.6	12558.6	4105.14	8491.61	11430.4	16438.6	17399.1	16164.3	42740.7	40637.7	35198.2	33892.5	60832.4	63515.1	Peak Found	High	High	Peak Found	High	High	Not Found	High	High	Peak Found
High	Q96L93-1	Kinesin-like protein KIF16B [OS=Homo sapiens]	1	1	4	1	1317	151.9	6.16	6.44	cellular component movement;metabolic process;regulation of biological process;response to stimulus;transport	cytoplasm;cytoskeleton;cytosol;endosome;membrane	catalytic activity;motor activity;nucleotide binding;protein binding	Pf00225, Pf00498, Pf00787, Pf04111	55614	ENSG00000089177.18	KIF16B	20		COPI-dependent Golgi-to-ER retrograde traffic; Kinesins		2.79043e+06	3.997e+06	1.77554e+06	1.39584e+06	1.09249e+06	994045	1.23944e+06	1.02514e+06	1.22165e+06	1.31714e+06	1.25662e+06	1.02164e+06	8.31889e+06	3.80856e+06	3.05521e+06	5.63594e+06	4.70906e+06	3.94024e+06	Peak Found	Peak Found	Peak Found	Peak Found	Peak Found	Peak Found	High	Peak Found	High	Peak Found
High	P40123	Adenylyl cyclase-associated protein 2 [OS=Homo sapiens]	4	1	6	1	477	52.8	6.37	11.55	cell organization and biogenesis;regulation of biological process;response to stimulus	cytoskeleton;membrane	protein binding	Pf01213, Pf07986, Pf08603	10486	ENSG00000112186.11	CAP2	6		Role of ABL in ROBO-SLIT signaling	Ectoderm Differentiation; Aryl Hydrocarbon Receptor Pathway	14948.4	15758.8	15287.3	6156.89	4921.83	6882.77	5247.77	5297.77	5995.21	5069.68	4331.62	3412	30301.7	14056.5	14071.7	16575.6	13788	21390.9	Peak Found	Peak Found	Peak Found	Peak Found	High	Peak Found	Peak Found	High	Peak Found	Peak Found
High	Q9NYU2-1	UDP-glucose:glycoprotein glucosyltransferase 1 [OS=Homo sapiens]	1	1	3	1	1555	177.1	5.63	7.24	metabolic process;regulation of biological process;response to stimulus	endoplasmic reticulum;organelle lumen	catalytic activity;protein binding	Pf06427	56886	ENSG00000136731.12	UGGT1	2	Protein processing in endoplasmic reticulum	ER Quality Control Compartment (ERQC)		2703.51	9407.94	2622.91	4463.36	3623.3	1845.71	2209.2	1798.72	2259.86	2621.52	3766.33	3305.65	2662.44	13684.7	8225.5	12822.8	11463.7	14672.1	Not Found	Peak Found	Not Found	Not Found	Not Found	Not Found	Not Found	Not Found	Not Found	Not Found
High	Q14247-1	Src substrate cortactin [OS=Homo sapiens]	21	9	102	9	550	61.5	5.4	239.97	cell organization and biogenesis;cellular component movement;regulation of biological process;transport	cytoplasm;cytoskeleton;cytosol;Golgi;membrane	protein binding	Pf00018, Pf02218, Pf07653, Pf14604	2017	ENSG00000085733.15	CTTN	11	Tight junction; Pathogenic Escherichia coli infection; Proteoglycans in cancer; Bacterial invasion of epithelial cells; Shigellosis	RHO GTPases activate PAKs; Clathrin-mediated endocytosis	Pathogenic Escherichia coli infection; Hepatitis C and Hepatocellular Carcinoma	263168	326052	296407	83142.1	102554	121550	120931	113373	108301	97027.4	95383.4	88707	582799	446700	370986	370344	435611	410640	High	High	High	High	High	High	High	High	High	High
High	Q9NYB9	abl interactor 2 [OS=Homo sapiens]	3	1	1	1	513	55.6	6.16	3.12	cell organization and biogenesis;cellular component movement;metabolic process;regulation of biological process;response to stimulus	cytoplasm;cytoskeleton;cytosol	DNA binding;enzyme regulator activity;protein binding	Pf00018, Pf07653, Pf07815, Pf14604	10152		ABI2	2	Regulation of actin cytoskeleton	Regulation of actin dynamics for phagocytic cup formation; VEGFA-VEGFR2 Pathway; RHO GTPases Activate WASPs and WAVEs	Regulation of Actin Cytoskeleton	3179.93	9608.08	16150.8	2012.72	2085.15	1906.2	2705.51	2398.4	3727.09	4340.47	4305.86	2382.59	4177.31	3065.43	13825.8	1844.85	21337	18577.3	Not Found	Peak Found	High	Not Found	Peak Found	Not Found	Not Found	Not Found	Not Found	Not Found
High	P69905	Hemoglobin subunit alpha [OS=Homo sapiens]	14	1	1	1	142	15.2	8.68	2.35	cell organization and biogenesis;metabolic process;regulation of biological process;response to stimulus;transport	cytosol;extracellular;membrane;organelle lumen	antioxidant activity;catalytic activity;metal ion binding;protein binding;transporter activity	Pf00042	3040; 3039	ENSG00000206172.8; ENSG00000188536.12	HBA2; HBA1	16	Malaria; African trypanosomiasis	Scavenging of heme from plasma; Erythrocytes take up carbon dioxide and release oxygen; Erythrocytes take up oxygen and release carbon dioxide	Selenium Micronutrient Network; Vitamin B12 Metabolism; Folate Metabolism; Effects of Nitric Oxide	3843.25	2517.94	9105.25	5887.55	9457.67	9022.09	3502.1	7893.47	5708.25	2117.29	1845.14	3382.46	3139.14	1862.42	10481.9	2876.87	9208.71	16086.2	Not Found	Not Found	Peak Found	Peak Found	High	Peak Found	Not Found	Peak Found	Peak Found	Not Found
High	Q15233	Non-POU domain-containing octamer-binding protein [OS=Homo sapiens]	3	1	21	1	471	54.2	8.95	39	defense response;metabolic process;regulation of biological process;response to stimulus	membrane;nucleus	DNA binding;protein binding;RNA binding	Pf00076, Pf08075, Pf13893, Pf14259	4841	ENSG00000147140.15	NONO	X			mRNA Processing	25642.5	29505.3	34302.1	9434.34	7547.66	9166.89	10254.1	7303.53	7934.18	6396.52	10479.6	12784.6	47936.8	45456.3	40133.5	58987.6	42083.5	47778.9	High	High	High	High	High	High	High	High	High	High
High	P00367	Glutamate dehydrogenase 1, mitochondrial [OS=Homo sapiens]	3	1	6	1	558	61.4	7.8	15.88	cell organization and biogenesis;metabolic process;regulation of biological process	cytoplasm;mitochondrion;organelle lumen	catalytic activity;nucleotide binding;protein binding	Pf00208, Pf02812	2746	ENSG00000148672.8	GLUD1	10	Arginine biosynthesis; Carbon metabolism; Proximal tubule bicarbonate reclamation; Alanine, aspartate and glutamate metabolism; Nitrogen metabolism; Metabolic pathways; D-Glutamine and D-glutamate metabolism	Transcriptional activation of mitochondrial biogenesis; Amino acid synthesis and interconversion (transamination)	Amino Acid metabolism; Urea cycle and metabolism of amino groups	2149.58	10988.9	18479.9	3330.65	5317.56	7720.58	3696.3	8062.31	3547.14	3418.43	3651.5	2045.42	3642.53	17855.6	17329.1	2687.73	15728	17787.1	Not Found	High	Peak Found	Peak Found	High	High	Not Found	High	Not Found	Not Found
High	Q92541	RNA polymerase-associated protein RTF1 homolog [OS=Homo sapiens]	2	1	2	1	710	80.3	8.15	5.33	cell organization and biogenesis;metabolic process;regulation of biological process;response to stimulus	nucleus	DNA binding;protein binding;RNA binding	Pf03126	23168	ENSG00000137815.14	RTF1	15		E3 ubiquitin ligases ubiquitinate target proteins; Formation of RNA Pol II elongation complex ; RNA Polymerase II Pre-transcription Events	Endoderm Differentiation	2794.54	4242.24	7599.76	2349.28	3807.95	2491.12	2834.42	3437.16	3843.04	2189.97	3426.72	1734.73	2394.29	3291.39	3858.02	3816.15	13992.8	14995.6	Not Found	Not Found	Peak Found	Not Found	Not Found	Not Found	Not Found	Not Found	Not Found	Not Found
High	P62277	40S ribosomal protein S13 [OS=Homo sapiens]	9	1	10	1	151	17.2	10.54	21.98	cell organization and biogenesis;metabolic process;regulation of biological process;transport	cytosol;membrane;nucleus;ribosome	protein binding;RNA binding;structural molecule activity	Pf00312, Pf08069	6207	ENSG00000110700.6	RPS13	11	Ribosome	Peptide chain elongation; Eukaryotic Translation Termination; Viral mRNA Translation; Formation of the ternary complex, and subsequently, the 43S complex; L13a-mediated translational silencing of Ceruloplasmin expression; Selenocysteine synthesis; Nonsense Mediated Decay (NMD) independent of the Exon Junction Complex (EJC); Nonsense Mediated Decay (NMD) enhanced by the Exon Junction Complex (EJC)…	Cytoplasmic Ribosomal Proteins	15573.7	15933.6	16244.9	2504.01	2834.2	3170.68	2469.66	4903.81	4236.48	2650.99	7343.36	3469.71	21343.8	24305.3	20887.9	22173.7	27216.5	20878.7	Peak Found	High	High	Not Found	Peak Found	Peak Found	Not Found	High	High	Not Found
High	P62937	peptidyl-prolyl cis-trans isomerase A [OS=Homo sapiens]	17	3	26	3	165	18	7.81	54.31	cell organization and biogenesis;cellular component movement;metabolic process;regulation of biological process;response to stimulus;transport	cytoplasm;cytosol;extracellular;membrane;nucleus;organelle lumen	catalytic activity;protein binding;RNA binding	Pf00160	5478	ENSG00000196262.13	PPIA	7		Budding and maturation of HIV virion; Gene and protein expression by JAK-STAT signaling after Interleukin-12 stimulation; Minus-strand DNA synthesis; Binding and entry of HIV virion; Basigin interactions; APOBEC3G mediated resistance to HIV-1 infection; Uncoating of the HIV Virion; Calcineurin activates NFAT; Platelet degranulation ; Plus-strand DNA synthesis; Integration of provirus; Neutrophil …	Prolactin Signaling Pathway	67619.8	234743	181549	92367.7	73703.6	100961	36024	73131.8	50174.5	32008.7	36070.8	301282	109618	514769	199778	79625.1	245856	232103	Peak Found	High	High	Peak Found	High	High	High	High	High	High
High	P16989-1	Y-box-binding protein 3 [OS=Homo sapiens]	4	2	11	2	372	40.1	9.77	23.19	metabolic process;regulation of biological process;response to stimulus	cytoplasm;cytosol;nucleus	DNA binding;protein binding;RNA binding	Pf00313	8531	ENSG00000060138.12	CSDA; YBX3	12	Tight junction		RalA downstream regulated genes; Apoptosis-related network due to altered Notch3 in ovarian cancer	6314.18	35809.3	47698.2	7641.8	11742.3	10266.8	4805.73	11785.7	13276.2	7957.43	9779.31	8486.42	20582.1	40153.1	50380.8	6206.37	55276.6	61570.3	Not Found	High	High	Not Found	High	High	Not Found	High	High	Peak Found
High	P62280	40S ribosomal protein S11 [OS=Homo sapiens]	6	1	7	1	158	18.4	10.3	17.4	cell differentiation;cell organization and biogenesis;metabolic process;transport	cytoplasm;cytosol;membrane;ribosome	protein binding;RNA binding;structural molecule activity	Pf00366	6205	ENSG00000142534.6	RPS11	19	Ribosome	Peptide chain elongation; Eukaryotic Translation Termination; Viral mRNA Translation; Formation of the ternary complex, and subsequently, the 43S complex; L13a-mediated translational silencing of Ceruloplasmin expression; Selenocysteine synthesis; Nonsense Mediated Decay (NMD) independent of the Exon Junction Complex (EJC); Nonsense Mediated Decay (NMD) enhanced by the Exon Junction Complex (EJC)…	Cytoplasmic Ribosomal Proteins	21230.6	21986.6	16562.5	4070.56	2810.57	2833.26	1914.73	3674.79	2995.95	3770.56	2755.21	3717.81	21828.1	18329.5	15715	21228.4	34170.3	25020.9	Peak Found	High	Peak Found	Not Found	Peak Found	Peak Found	Not Found	Peak Found	Peak Found	Not Found
High	P46776	60S ribosomal protein L27a [OS=Homo sapiens]	18	3	29	3	148	16.6	11	41.35	cell organization and biogenesis;metabolic process;transport	cytosol;endoplasmic reticulum;membrane;ribosome	protein binding;RNA binding;structural molecule activity	Pf00828	6157	ENSG00000166441.12	RPL27A	11	Ribosome	Peptide chain elongation; Eukaryotic Translation Termination; Viral mRNA Translation; L13a-mediated translational silencing of Ceruloplasmin expression; Nonsense Mediated Decay (NMD) independent of the Exon Junction Complex (EJC); Selenocysteine synthesis; Nonsense Mediated Decay (NMD) enhanced by the Exon Junction Complex (EJC); GTP hydrolysis and joining of the 60S ribosomal subunit; Major path…	Cytoplasmic Ribosomal Proteins	61537.8	78381.4	104031	16053.9	25999	25011.1	12618.8	28868.5	22608.9	17677.1	28002.9	12745.2	86650.1	91431.1	101166	88879.9	137831	129832	High	High	High	High	High	High	Peak Found	High	High	Peak Found
High	Q96AE4	Far upstream element-binding protein 1 [OS=Homo sapiens]	2	1	2	1	644	67.5	7.61	5.05	metabolic process;regulation of biological process	nucleus	DNA binding;protein binding;RNA binding	Pf00013, Pf07650, Pf13014	8880	ENSG00000162613.16	FUBP1	1				2014.21	11430.5	11824.5	2604.96	2611.91	5848.04	3784.85	3877.56	4283.63	3989.83	1747.81	1838.51	4030.09	23211.9	15699.6	4182.16	14116.9	13646.5	Not Found	Peak Found	Peak Found	Not Found	Not Found	Peak Found	Not Found	Peak Found	Peak Found	Not Found
High	P30533	alpha-2-macroglobulin receptor-associated protein [OS=Homo sapiens]	5	3	36	3	357	41.4	8.78	84.65	regulation of biological process;transport	cell surface;cytoplasm;endoplasmic reticulum;endosome;extracellular;Golgi;membrane;organelle lumen	protein binding	Pf06400, Pf06401	4043	ENSG00000163956.10	LRPAP1	4				168529	263667	234799	21699.8	37326.7	46972.2	27438.9	42033.8	41588.9	31011.9	40652.5	34430.7	225844	224504	179303	208060	304021	257144	High	High	High	High	High	High	Peak Found	High	High	Peak Found
High	Q8IYS1	Peptidase M20 domain-containing protein 2 [OS=Homo sapiens]	2	1	3	1	436	47.7	5.85	7.37	metabolic process;regulation of biological process		catalytic activity	Pf01546, Pf07687	135293	ENSG00000146281.5	PM20D2	6				16076.1	25702.1	20253.8	1824.04	2744.59	4118.94	2139.2	2149.29	3439.65	3299.12	3607.58	3503.85	20821.3	26416.1	21768.3	16046.7	31308.6	26197	Peak Found	Peak Found	High	Not Found	Not Found	Not Found	Not Found	Not Found	Not Found	Not Found
High	Q8IZP0	abl interactor 1 [OS=Homo sapiens]	3	1	9	1	508	55	7.06	27.18	cell organization and biogenesis;cellular component movement;metabolic process;regulation of biological process;response to stimulus	cytoplasm;cytoskeleton;cytosol;endoplasmic reticulum;membrane;nucleus	enzyme regulator activity;protein binding	Pf00018, Pf07653, Pf07815, Pf14604	10006	ENSG00000136754.16	ABI1	10		Regulation of actin dynamics for phagocytic cup formation; VEGFA-VEGFR2 Pathway; RHO GTPases Activate WASPs and WAVEs	EGF/EGFR Signaling Pathway	25614.4	23766.8	27584.1	3989.06	6332.85	5333.89	3382.59	4139.8	3724.35	6098.14	3916.56	4143.9	32918.2	39934.7	23405.1	20724.4	41597.2	31294.5	Peak Found	High	High	Peak Found	Peak Found	High	Not Found	High	Peak Found	Peak Found
High	O00391	Sulfhydryl oxidase 1 [OS=Homo sapiens]	5	2	11	2	747	82.5	8.92	33.85	cellular homeostasis;metabolic process;regulation of biological process;transport	extracellular;Golgi;membrane;organelle lumen	catalytic activity	Pf00085, Pf04777, Pf13905	5768	ENSG00000116260.16	QSOX1	1		Platelet degranulation ; Post-translational protein phosphorylation; Regulation of Insulin-like Growth Factor (IGF) transport and uptake by Insulin-like Growth Factor Binding Proteins (IGFBPs); Neutrophil degranulation		22673.1	27520.3	29271.3	6354.88	6421.93	7781.96	5764.98	6367.15	6251.13	5033.22	6563.43	5315.26	33848.5	32348.9	43891.5	14265.2	41094	48177.4	Peak Found	High	High	Not Found	High	High	Not Found	High	Peak Found	Not Found
High	Q96D71	RalBP1-associated Eps domain-containing protein 1 [OS=Homo sapiens]	3	1	8	1	796	86.6	5.69	21.84	cell organization and biogenesis;transport	cytosol;membrane	metal ion binding;protein binding	Pf12763, Pf13499	85021	ENSG00000135597.18	REPS1	6		Cargo recognition for clathrin-mediated endocytosis		3544.33	16900.3	17077.4	3873.55	2781.15	3873.82	3531.76	3120.63	3515.42	2500.98	3506.02	4217.68	24504.9	27392	18901.9	3259.72	27442.7	28548.7	Not Found	High	High	Not Found	Not Found	Not Found	Not Found	Not Found	Not Found	Not Found
High	P62273-1	40S ribosomal protein S29 [OS=Homo sapiens]	18	1	9	1	56	6.7	10.13	18.72	cell organization and biogenesis;metabolic process;transport	cytosol;ribosome	metal ion binding;structural molecule activity	Pf00253	6235	ENSG00000213741.9	RPS29	14	Ribosome	Peptide chain elongation; Eukaryotic Translation Termination; Viral mRNA Translation; Formation of the ternary complex, and subsequently, the 43S complex; L13a-mediated translational silencing of Ceruloplasmin expression; Selenocysteine synthesis; Nonsense Mediated Decay (NMD) independent of the Exon Junction Complex (EJC); Nonsense Mediated Decay (NMD) enhanced by the Exon Junction Complex (EJC)…	Cytoplasmic Ribosomal Proteins	16926.9	27043.2	18945.8	4354.42	3546.99	3317.33	2488.5	4548.81	4422.48	3662.7	5733.96	2122.6	28859.3	31791	24994.6	15544.3	29368.3	32245.7	Peak Found	Peak Found	High	Not Found	High	Peak Found	Not Found	High	Peak Found	Not Found
High	P02458-1	Isoform 1 of Collagen alpha-1(II) chain [OS=Homo sapiens]	1	1	4	1	1418	134.3	8.56	6.57	cell differentiation;cell organization and biogenesis;metabolic process;regulation of biological process;response to stimulus	extracellular;organelle lumen	metal ion binding;protein binding;structural molecule activity	Pf01391, Pf01410	1280	ENSG00000139219.17	COL2A1	12			Neural Crest Differentiation; Spinal Cord Injury; Focal Adhesion; Simplified Interaction Map Between LOXL4 and Oxidative Stress Pathway; Focal Adhesion-PI3K-Akt-mTOR-signaling pathway; Endochondral Ossification	27279.8	26148.7	28780.9	6869.93	4075.53	5902.06	3934.78	6886.22	6054.76	5910.97	5932.97	7712.74	39755.1	40118.4	30054.8	39229.3	51635.2	48379.5	Peak Found	High	Peak Found	Not Found	Not Found	Not Found	Not Found	Not Found	Not Found	Not Found
High	O15234	Protein CASC3 [OS=Homo sapiens]	1	1	1	1	703	76.2	6.48	3.06	metabolic process;regulation of biological process;transport	cytoplasm;cytosol;membrane;nucleus	protein binding;RNA binding	Pf09405	22794	ENSG00000108349.16	CASC3	17	mRNA surveillance pathway; RNA transport	mRNA 3'-end processing; mRNA Splicing - Major Pathway; Cleavage of Growing Transcript in the Termination Region ; Regulation of expression of SLITs and ROBOs; Transport of Mature mRNA derived from an Intron-Containing Transcript; Nonsense Mediated Decay (NMD) enhanced by the Exon Junction Complex (EJC)		3569.88	19791.4	17823.6	4339.63	6002.6	5436.7	2669.16	4175.9	4969.39	2931.68	3955.04	3038.73	26117.5	26879.5	28134.5	11484.9	26980.9	24916.3	Not Found	Peak Found	Peak Found	Peak Found	Peak Found	Peak Found	Not Found	Peak Found	Peak Found	Not Found
High	Q9NYF8-1	Bcl-2-associated transcription factor 1 [OS=Homo sapiens]	3	2	11	2	920	106.1	9.98	25.25	cell death;metabolic process;regulation of biological process;response to stimulus	cytoplasm;nucleus	DNA binding;protein binding;RNA binding	Pf15440	9774	ENSG00000029363.16	BCLAF1	6			Interactome of polycomb repressive complex 2 (PRC2)	25545	37863.9	38002.1	7403.22	7893.88	7564.84	6075.47	5520.39	6475.28	6239.19	8022.33	4290.67	48325.3	36886	32195.6	40696	52196.5	60512.4	Peak Found	High	High	Not Found	Peak Found	Peak Found	Not Found	Peak Found	Peak Found	Not Found
High	P56181-2	Isoform 2 of NADH dehydrogenase [ubiquinone] flavoprotein 3, mitochondrial [OS=Homo sapiens]	4	1	6	1	473	51	9.17	16.79	cell organization and biogenesis;metabolic process	membrane;mitochondrion	catalytic activity;RNA binding		4731	ENSG00000160194.17	NDUFV3	21			Electron Transport Chain; Oxidative phosphorylation	3543.03	30024.3	23336.9	3962.2	2387.94	2978.96	2889.92	1933.98	3943.38	3798.77	4243.34	3558.95	12859.5	28349.6	27531.1	4348.16	32584.8	36530.2	Not Found	High	High	Not Found	Not Found	Not Found	Not Found	Not Found	Not Found	Not Found
High	P62266	40S ribosomal protein S23 [OS=Homo sapiens]	12	1	24	1	143	15.8	10.49	58.83	cell organization and biogenesis;metabolic process;transport	cytosol;membrane;ribosome	protein binding;RNA binding;structural molecule activity	Pf00164	6228	ENSG00000186468.12	RPS23	5	Ribosome	Peptide chain elongation; Eukaryotic Translation Termination; Viral mRNA Translation; Formation of the ternary complex, and subsequently, the 43S complex; L13a-mediated translational silencing of Ceruloplasmin expression; Selenocysteine synthesis; Nonsense Mediated Decay (NMD) independent of the Exon Junction Complex (EJC); Nonsense Mediated Decay (NMD) enhanced by the Exon Junction Complex (EJC)…	Cytoplasmic Ribosomal Proteins	125342	143470	139991	8336.51	17186.2	24102.7	9736.86	16974.8	13657.9	18519.5	20296.6	16332	187551	179352	169903	150533	187124	173441	High	High	High	Peak Found	High	High	Peak Found	High	Peak Found	High
High	P47914	60S ribosomal protein L29 [OS=Homo sapiens]	13	2	30	2	159	17.7	11.66	80.95	cell organization and biogenesis;metabolic process;transport	cytosol;membrane;ribosome	protein binding;RNA binding;structural molecule activity	Pf01779	6159	ENSG00000162244.10	RPL29	3	Ribosome	Peptide chain elongation; Eukaryotic Translation Termination; Viral mRNA Translation; L13a-mediated translational silencing of Ceruloplasmin expression; Nonsense Mediated Decay (NMD) independent of the Exon Junction Complex (EJC); Selenocysteine synthesis; Nonsense Mediated Decay (NMD) enhanced by the Exon Junction Complex (EJC); GTP hydrolysis and joining of the 60S ribosomal subunit; Major path…	Cytoplasmic Ribosomal Proteins	337532	441936	450386	46328.1	55021.6	62123.9	63531.2	65342.3	58901.5	64339.7	55737.9	64977.3	675700	753184	626616	498645	814636	747568	High	High	High	Peak Found	High	Peak Found	High	High	High	High
High	O75533-1	splicing factor 3B subunit 1 [OS=Homo sapiens]	2	2	10	2	1304	145.7	7.09	30.22	cell organization and biogenesis;metabolic process;regulation of biological process;response to stimulus	nucleus;spliceosomal complex	DNA binding;protein binding;receptor activity;RNA binding;signal transducer activity	Pf02161, Pf08920, Pf12815, Pf13513	23451	ENSG00000115524.15	SF3B1	2	Spliceosome	B-WICH complex positively regulates rRNA expression; mRNA Splicing - Major Pathway; mRNA Splicing - Minor Pathway	mRNA Processing	5993.31	51645.7	56398.8	3657.28	12077.3	11415.2	6183.89	11793.1	9271.88	7387.78	11459.1	7870.65	58727.1	75800.6	60037.2	29830.8	91674.5	91604.3	Not Found	Peak Found	High	Not Found	Peak Found	High	Not Found	High	Peak Found	Peak Found
High	O60583	Cyclin-T2 [OS=Homo sapiens]	1	1	3	1	730	81	8.92	6.81	cell division;metabolic process;regulation of biological process	cytoplasm;cytosol;membrane;nucleus	catalytic activity;enzyme regulator activity;protein binding;RNA binding	Pf00134	905	ENSG00000082258.12	CCNT2	2	Transcriptional misregulation in cancer	HIV elongation arrest and recovery; RNA polymerase II transcribes snRNA genes; SMAD2/SMAD3:SMAD4 heterotrimer regulates transcription; TP53 Regulates Transcription of DNA Repair Genes; Formation of RNA Pol II elongation complex ; Formation of HIV elongation complex in the absence of HIV Tat; RNA Polymerase II Pre-transcription Events; Pausing and recovery of HIV elongation		12303.6	21928.9	32951.6	4397.13	3260.68	1808.17	4121.04	2873.67	5070.68	3060.65	2914.21	9768.76	37869.8	59993.3	54781.6	35532.4	40196.8	101659	Peak Found	Peak Found	High	Not Found	Not Found	Not Found	Not Found	Not Found	Peak Found	Not Found
High	P54851	Epithelial membrane protein 2 [OS=Homo sapiens]	5	1	4	1	167	19.2	7.62	5.24	cell death;cell organization and biogenesis;cell proliferation;cellular component movement;regulation of biological process;response to stimulus;transport	cell surface;cytoplasm;cytosol;Golgi;membrane;nucleus	protein binding	Pf00822, Pf13903	2013	ENSG00000213853.9	EMP2	16				71579.3	29119.8	34383.3	18379.8	10660.4	10637.1	18531.9	2838.85	9049.25	3597.96	1960.72	2039.88	33610.1	29155.3	34209.8	26132.5	30970.1	27766.3	Peak Found	Peak Found	Peak Found	Peak Found	High	High	Peak Found	Not Found	Peak Found	Not Found
High	P12277	Creatine kinase B-type [OS=Homo sapiens]	3	1	16	1	381	42.6	5.59	50.28	cellular homeostasis;metabolic process	cytoplasm;cytosol;mitochondrion;nucleus	catalytic activity;nucleotide binding;protein binding	Pf00217, Pf02807	1152	ENSG00000166165.12	CKB	14	Metabolic pathways; Arginine and proline metabolism	Creatine metabolism	Urea cycle and metabolism of amino groups	77991.4	170289	194240	14474.4	51417.6	71526.3	20165.6	65000.6	43650.7	23839.8	42664	20990.2	295266	399899	263787	173259	506611	477184	Peak Found	High	High	Peak Found	High	High	Peak Found	High	High	Peak Found
High	P62847-4	Isoform 4 of 40S ribosomal protein S24 [OS=Homo sapiens]	4	2	25	2	289	32.4	10.15	45.58	cell organization and biogenesis;metabolic process;transport	cytosol;membrane;nucleus;ribosome	protein binding;RNA binding;structural molecule activity	Pf01282	6229	ENSG00000138326.18	RPS24	10			Cytoplasmic Ribosomal Proteins	238799	226049	228656	9171.82	12621.9	17374.6	9911.03	12913.2	14271.8	14998.7	13467.4	15389.1	343334	365206	268442	346814	362590	299948	Peak Found	High	High	Peak Found	High	High	Peak Found	High	High	Peak Found
High	AGIA	Light	7	1	16	1	239	25.3	5.26	45.19												56234.2	69529.4	75455.5	3480.35	3581.81	3155.82	2991.1	2355.88	3888.42	2323.96	3265.3	2049.38	72941.8	95068.5	62427.8	48128	86690.9	79214.6	High	High	High	Not Found	Not Found	Not Found	Not Found	Peak Found	Not Found	Not Found
High	AGIA-fabID	Heavy	18	9	732	2	571	62.2	6.8	1865.77												2.66646e+06	4.55597e+06	4.45531e+06	7574.31	11242.1	8523.96	9094.67	9181.44	8924.43	9797.89	9258.92	9412.23	4.17981e+06	6.20136e+06	4.20824e+06	5.14935e+06	6.33876e+06	5.96375e+06	High	High	High	Not Found	Not Found	Not Found	Not Found	Not Found	Not Found	Not Found
[truncated: 17 more columns]
