# Supplementary material for: Proximity extracellular protein-protein interaction analysis of EGFR using AirID-conjugated fragment of antigen binding
Source: Nat Commun. 2023 Dec 14;14:8301. doi: 10.1038/s41467-023-43931-7 (PMC10721602; doi:10.1038/s41467-023-43931-7)
Supplement: Supplementary file 9 — Supplementary Data 6 [file 41467_2023_43931_MOESM9_ESM.xlsx]

## Sheet: Proteins
Protein FDR Confidence: Combined	Accession	Description	Coverage [%]	# Peptides	# PSMs	# Unique Peptides	# AAs	MW [kDa]	calc. pI	Score Sequest HT: Sequest HT	Biological Process	Cellular Component	Molecular Function	Pfam IDs	Entrez Gene ID	Gene Symbol	Gene ID	Ensembl Gene ID	WikiPathways	Reactome Pathways	Abundances (Normalized): F7: Sample, 1 H226 AGIA-FabiD DMSO n=1	Abundances (Normalized): F13: Sample, 1 H226 AGIA-FabiD DMSO n=2	Abundances (Normalized): F27: Sample, 1 H226 AGIA-FabiD DMSO n=3	Abundances (Normalized): F8: Sample, 2 H226 AGIA-FabiD DMSO EGF n=1	Abundances (Normalized): F14: Sample, 2 H226 AGIA-FabiD DMSO EGF n=2	Abundances (Normalized): F28: Sample, 2 H226 AGIA-FabiD DMSO EGF n=3	Abundances (Normalized): F9: Sample, 3 H226 AGIA-FabiD Gefitinib EGF n=1	Abundances (Normalized): F23: Sample, 3 H226 AGIA-FabiD Gefitinib EGF n=2	Abundances (Normalized): F29: Sample, 3 H226 AGIA-FabiD Gefitinib EGF n=3	Abundances (Normalized): F10: Sample, 4 H226 EGFR-FabID DMSO n=1	Abundances (Normalized): F24: Sample, 4 H226 EGFR-FabID DMSO n=2	Abundances (Normalized): F30: Sample, 4 H226 EGFR-FabID DMSO n=3	Abundances (Normalized): F11: Sample, 5 H226 EGFR-FabID DMSO EGF n=1	Abundances (Normalized): F25: Sample, 5 H226 EGFR-FabID DMSO EGF n=2	Abundances (Normalized): F31: Sample, 5 H226 EGFR-FabID DMSO EGF n=3	Abundances (Normalized): F12: Sample, 6 H226 EGFR-FabID Gefitinib EGF n=1	Abundances (Normalized): F26: Sample, 6 H226 EGFR-FabID Gefitinib EGF n=1	Abundances (Normalized): F33: Sample, 6 H226 EGFR-FabID Gefitinib EGF n=3	Found in Sample: [S7] F7: Sample, 1 AGIA-FabID DMSO n=1	Found in Sample: [S13] F13: Sample, 1 AGIA-FabID DMSO n=2	Found in Sample: [S27] F27: Sample, 1 AGIA-FabID DMSO n=3	Found in Sample: [S8] F8: Sample, 2 AGIA-FabID DMSO EGF n=1	Found in Sample: [S14] F14: Sample, 2 AGIA-FabID DMSO EGF n=2	Found in Sample: [S28] F28: Sample, 2 AGIA-FabID DMSO EGF n=3	Found in Sample: [S9] F9: Sample, 3 AGIA-FabID Gefitinib EGF n=1	Found in Sample: [S23] F23: Sample, 3 AGIA-FabID Gefitinib EGF n=2	Found in Sample: [S29] F29: Sample, 3 AGIA-FabID Gefitinib EGF n=3	Found in Sample: [S10] F10: Sample, 4 EGFR-FabID DMSO n=1	Found in Sample: [S24] F24: Sample, 4 EGFR-FabID DMSO n=2
High	Q08J23	RNA cytosine C(5)-methyltransferase NSUN2 OS=Homo sapiens OX=9606 GN=NSUN2 PE=1 SV=2	2	2	11	2	767	86.4	6.77	12.01	cell cycle OR cell proliferation;RNA metabolism OR transcription;other metabolic processes;developmental processes;signal transduction;other biological processes	non-structural extracellular;cytoskeleton;mitochondrion;nucleus;other cell component	nucleic acid binding activity;other molecular function	Pf01189	54888	NSUN2	A8K529; B2RNR4; B3KP09; B4DQW2; G3V1R4; hsa:54888; Q08J23; Q9BVN4; Q9H858; Q9NXD9	ENSG00000037474		tRNA modification in the nucleus and cytosol	3235.75	2115.96	1746.86	2578.61	1659	3008.58	2366.69	2642.3	2797.03	6.11429e+06	1.07911e+07	7.75819e+06	5.29258e+06	6.19202e+06	6.06766e+06	8.93456e+06	5.93225e+06	4.92336e+06	Peak Found	Not Found	Peak Found	Peak Found	Not Found	Not Found	Peak Found	Not Found	Peak Found	Peak Found	High
High	P55287	Cadherin-11 OS=Homo sapiens OX=9606 GN=CDH11 PE=1 SV=2	6	4	64	4	796	87.9	4.91	174.86	cell adhesion;cell organization and biogenesis;developmental processes;other biological processes	plasma membrane;other membranes;other cell component	other molecular function	Pf00028, Pf01049	1009	CDH11	A8K5D6; A8MZC8; B7WP28; hsa:1009; P55287; Q15065; Q15066; Q9UQ93; Q9UQ94	ENSG00000140937	Hippo signaling regulation pathways; Hippo-Merlin signaling dysregulation; Cell migration and invasion through p75NTR; Neural crest cell migration during development; Neural crest cell migration in cancer; Malignant pleural mesothelioma	Adherens junctions interactions	24373.2	14334.1	12199.3	23120.7	14531.1	11501.4	28352.8	11035.3	11185.5	1.44161e+06	418503	305497	952599	222293	488596	804869	148521	342170	Peak Found	Peak Found	Not Found	Peak Found	Peak Found	Not Found	High	Peak Found	Not Found	High	High
High	P03956	Interstitial collagenase OS=Homo sapiens OX=9606 GN=MMP1 PE=1 SV=3	2	1	21	1	469	54	6.96	40.95	cell organization and biogenesis;protein metabolism;other metabolic processes;other biological processes	non-structural extracellular;extracellular matrix	other molecular function	Pf00045, Pf00413, Pf01471	4312	MMP1	hsa:4312; P03956; P08156	ENSG00000196611	Matrix metalloproteinases; Oncostatin M signaling pathway; Quercetin and Nf-kB / AP-1 induced apoptosis; Bladder cancer; Photodynamic therapy-induced NF-kB survival signaling; Hepatitis C and hepatocellular carcinoma; TGF-beta signaling pathway; PPAR signaling pathway; Relationship between inflammation, COX-2 and EGFR; IL-18 signaling pathway; Burn wound healing; Overview of proinflammatory and p…	Regulation of Insulin-like Growth Factor (IGF) transport and uptake by Insulin-like Growth Factor Binding Proteins (IGFBPs); Interleukin-4 and Interleukin-13 signaling; Collagen degradation; Basigin interactions; Activation of Matrix Metalloproteinases	2367.6	3981.44	7047.04	6397.04	4291.39	2786.57	10997.8	7064.33	9753.22	93629.8	69906.3	101328	83089.4	95315.1	66202.7	92862.6	68151.3	83796.6	High	Peak Found	Peak Found	Peak Found	Peak Found	Not Found	High	Peak Found	High	High	High
High	P10909	Clusterin OS=Homo sapiens OX=9606 GN=CLU PE=1 SV=1	4	2	7	2	449	52.5	6.27	11.45	cell cycle OR cell proliferation;cell organization and biogenesis;protein metabolism;other metabolic processes;stress response;transport;developmental processes;signal transduction;other biological processes	non-structural extracellular;other membranes;cytosol;mitochondrion;ER/Golgi;nucleus;other cell component	signal transduction activity or receptor binding;cytoskeletal activity;other molecular function	Pf01093	1191	CLU	B2R9Q1; B3KSE6; hsa:1191; P10909; P11380; P11381; Q2TU75; Q5HYC1; Q7Z5B9	ENSG00000120885	Male infertility; Complement system in neuronal development and plasticity; Complement and coagulation cascades	Regulation of Complement cascade; Platelet degranulation ; Antimicrobial peptides; Terminal pathway of complement	49629.8	40247.7	44006.6	3904.31	3318.92	5153.85	25513.6	46008.5	45027	48965.3	44205.9	61166.4	43732.6	88874.1	55285	48982.6	94798.4	80919.7	Peak Found	Peak Found	Peak Found	Not Found	Not Found	Not Found	Peak Found	Peak Found	High	High	Peak Found
High	P69905	Hemoglobin subunit alpha OS=Homo sapiens OX=9606 GN=HBA1 PE=1 SV=2	14	1	2	1	142	15.2	8.68	2.12	other metabolic processes;stress response;transport;other biological processes	non-structural extracellular;cytosol;translational apparatus;other cell component	other molecular function	Pf00042	3039; 3040	HBA1; HBA2	hsa:3039; hsa:3040; P01922; P69905; Q1HDT5; Q3MIF5; Q53F97; Q96KF1; Q9NYR7; Q9UCM0	ENSG00000188536; ENSG00000206172	Selenium micronutrient network; Vitamin B12 metabolism; Folate metabolism; Effects of nitric oxide	Scavenging of heme from plasma; Heme signaling; Cytoprotection by HMOX1; Erythrocytes take up carbon dioxide and release oxygen; Erythrocytes take up oxygen and release carbon dioxide	30587.1	3371.67	3680.95	17718.3	2911.55	1530.43	52221.5	8785.05	3388.39	36774.7	9471.06	1819.04	54468.2	10457.6	34985.8	74351.1	3931.73	17682.4	Peak Found	Not Found	Not Found	Peak Found	Not Found	Not Found	High	Peak Found	Not Found	High	Peak Found
High	P98088	Mucin-5AC OS=Homo sapiens OX=9606 GN=MUC5AC PE=1 SV=4	0	1	2	1	5654	585.2	7.02	0	signal transduction	non-structural extracellular;extracellular matrix;plasma membrane;other membranes;ER/Golgi;other cell component	extracellular structural activity	Pf00094, Pf01826, Pf08742, Pf13330	4586	MUC5AC	A0A096LPK4; hsa:4586; O60460; O76065; P98088; Q13792; Q14425; Q658Q1; Q7M4S5; Q8N4M9; Q8WWQ3; Q8WWQ4; Q8WWQ5	ENSG00000215182; ENSG00000283158		Dectin-2 family; Termination of O-glycan biosynthesis; Defective GALNT3 causes HFTC; Defective C1GALT1C1 causes TNPS; Defective GALNT12 causes CRCS1	52975.2	14265.6	20535.8	39852.8	8453.72	14712.8	42433.6	23940.3	21328.6	99002.9	69553.4	40468	145095	51645.4	144368	122643	1479.95	77929	Peak Found	Peak Found	Peak Found	Peak Found	Peak Found	Peak Found	Peak Found	Peak Found	Peak Found	High	Peak Found
High	P10321	HLA class I histocompatibility antigen, C alpha chain OS=Homo sapiens OX=9606 GN=HLA-C PE=1 SV=3	5	2	19	1	366	40.6	6.04	42.61	stress response;other biological processes	plasma membrane;other membranes;ER/Golgi;other cytoplasmic organelle;other cell component	other molecular function	Pf00129, Pf06623, Pf07654	3107	HLA-C	hsa:3107; O02863; O02864; O02865; O02866; O02958; O19505; O19652; O19676; O62879; O62882; O62883; O62888; O78060; O78061; O78062; O78063; O78067; O78068; O78069; O78072; O78083; O78090; O78091; O78149; O78165; O78166; O78178; O78202; O78203; O78211; O78214; P04222; P10321; P30499; P30500; P30501; P30502; P30503; P30504; P30505; P30506; P30507; P30508; P30509; P30510; P79498; Q07000; Q29631; Q2964…	ENSG00000204525	Proteasome degradation; Allograft rejection; Ebola virus infection in host	Immunoregulatory interactions between a Lymphoid and a non-Lymphoid cell; Neutrophil degranulation; ER-Phagosome pathway; SARS-CoV-2 activates/modulates innate and adaptive immune responses; Interferon gamma signaling; Interferon alpha/beta signaling; Antigen Presentation: Folding, assembly and peptide loading of class I MHC; Endosomal/Vacuolar pathway; DAP12 interactions	4086.54	1685.6	4064.08	1772.04	1848.45	1823.08	44637.8	18203.9	22680.3	5024.77	7851.19	14404.7	15470.9	17619.3	20642.3	9450.6	11690.3	11350.5	Not Found	Not Found	Not Found	Not Found	Not Found	Not Found	Peak Found	Peak Found	Peak Found	Peak Found	Peak Found
High	Q29983	MHC class I polypeptide-related sequence A OS=Homo sapiens OX=9606 GN=MICA PE=1 SV=1	7	3	30	3	383	42.9	6.98	33.88	stress response;other biological processes	non-structural extracellular;plasma membrane;other membranes;other cell component	signal transduction activity or receptor binding	Pf00129, Pf07654	100507436	MICA	A8KQR0; A9LRW5; A9QVE0; B1VJF1; hsa:100507436; O60917; O60918; O60919; O60920; O60933; O77956; O78150; O78151; O78152; O78153; O97987; O97988; O97989; O97990; O97991; O97992; O97993; O97994; O97995; O98234; O98235; O98236; O98237; O98238; P79506; P79507; P79508; P79509; P79510; P79511; P79512; P79513; P79514; P79515; P79516; P79517; P79518; P79519; P79520; P79521; Q29983; Q5C9P8; Q5XM81; Q70I48; …	ENSG00000183214; ENSG00000235233	Allograft rejection	Immunoregulatory interactions between a Lymphoid and a non-Lymphoid cell	14199.7	12235.6	13904.8	13557.7	13666.2	13900.9	15966	13328.1	16857.3	159106	137397	218891	155711	130038	100364	87456.9	82966	105315	Not Found	Not Found	Not Found	Not Found	Not Found	Not Found	Not Found	Not Found	Not Found	High	High
High	P00533	Epidermal growth factor receptor OS=Homo sapiens OX=9606 GN=EGFR PE=1 SV=2	6	6	64	6	1210	134.2	6.68	87.12	cell adhesion;cell organization and biogenesis;protein metabolism;other metabolic processes;stress response;developmental processes;signal transduction;other biological processes	non-structural extracellular;plasma membrane;other membranes;ER/Golgi;nucleus;other cytoplasmic organelle;other cell component	cytoskeletal activity;nucleic acid binding activity;kinase activity;other molecular function	Pf00757, Pf01030, Pf07714, Pf14843	1956	EGFR	hsa:1956; O00688; O00732; P00533; P06268; Q14225; Q68GS5; Q92795; Q9BZS2; Q9GZX1; Q9H2C9; Q9H3C9; Q9UMD7; Q9UMD8; Q9UMG5	ENSG00000146648	Androgen receptor signaling pathway; Glioblastoma signaling pathways; AGE/RAGE pathway; Gastric cancer network 2; Spinal cord injury; Aryl hydrocarbon receptor pathway; Mammary gland development pathway - Pregnancy and lactation (Stage 3 of 4); Bladder cancer; TCA cycle nutrient use and invasiveness of ovarian cancer; Extracellular vesicle-mediated signaling in recipient cells; Aryl hydrocarbon r…	HCMV Early Events; Estrogen-dependent nuclear events downstream of ESR-membrane signaling; Cargo recognition for clathrin-mediated endocytosis; NOTCH3 Activation and Transmission of Signal to the Nucleus; PIP3 activates AKT signaling; Constitutive Signaling by Aberrant PI3K in Cancer; PI5P, PP2A and IER3 Regulate PI3K/AKT Signaling; RAF/MAP kinase cascade; Signaling by ERBB4; SHC1 events in ERBB2…	300383	298020	332091	29794.5	42674	48843.7	141446	115605	109340	503950	464234	510890	345794	394454	324705	233639	403580	351537	High	High	High	Peak Found	High	High	Peak Found	High	High	High	High
High	P06213	Insulin receptor OS=Homo sapiens OX=9606 GN=INSR PE=1 SV=4	1	1	6	1	1382	156.2	6.2	4.11	cell organization and biogenesis;protein metabolism;other metabolic processes;transport;developmental processes;signal transduction;other biological processes	plasma membrane;other membranes;other cytoplasmic organelle;other cell component	signal transduction activity or receptor binding;kinase activity;other molecular function	Pf00757, Pf01030, Pf07714, Pf17870	3643	INSR	hsa:3643; P06213; Q17RW0; Q59H98; Q9UCB7; Q9UCB8; Q9UCB9	ENSG00000171105	AMP-activated protein kinase (AMPK) signaling; Selenium micronutrient network; Vitamin B12 metabolism; Type II diabetes mellitus; Folate metabolism; Alzheimer's disease and miRNA effects; AGE/RAGE pathway; Nanoparticle triggered autophagic cell death; Transcription factor regulation in adipogenesis; Angiopoietin-like protein 8 regulatory pathway; Focal adhesion: PI3K-Akt-mTOR-signaling pathway; L…	PI5P, PP2A and IER3 Regulate PI3K/AKT Signaling; Insulin receptor recycling; IRS activation; Signal attenuation	3687.78	6045.19	7748.46	5283.69	4972.04	3761.22	6804.23	4187.39	6040.6	31897.7	41082.4	45219.1	36177.3	26804.5	39512.4	16089.2	21582.3	23925.5	Not Found	Not Found	Not Found	Not Found	Not Found	Not Found	Not Found	Not Found	Not Found	High	High
High	P07437	Tubulin beta chain OS=Homo sapiens OX=9606 GN=TUBB PE=1 SV=2	24	7	145	2	444	49.6	4.89	218.29	cell cycle OR cell proliferation;cell organization and biogenesis;stress response;transport;other biological processes	non-structural extracellular;other membranes;cytosol;cytoskeleton;nucleus;other cytoplasmic organelle;other cell component	signal transduction activity or receptor binding;cytoskeletal activity;other molecular function	Pf00091, Pf03953	203068	TUBB	hsa:203068; P05218; P07437; Q8WUC1; Q9CY33	ENSG00000183311; ENSG00000196230; ENSG00000224156; ENSG00000227739; ENSG00000229684; ENSG00000232421; ENSG00000232575; ENSG00000235067	Alzheimer's disease and miRNA effects; Pathogenic Escherichia coli infection; Parkin-ubiquitin proteasomal system pathway; Alzheimer's disease	Neutrophil degranulation; Potential therapeutics for SARS; Recruitment of NuMA to mitotic centrosomes; Regulation of PLK1 Activity at G2/M Transition; Loss of Nlp from mitotic centrosomes; Recruitment of mitotic centrosome proteins and complexes; Anchoring of the basal body to the plasma membrane; AURKA Activation by TPX2	23563.3	4548.92	19650	27348.7	2425.8	4114.12	35844.3	14649.1	12219.7	27802.2	23106.9	11741	34879.5	26863.5	27157.3	28458	30856.2	26416.3	High	Peak Found	High	Peak Found	Not Found	Not Found	High	High	High	High	High
High	Q96RQ3	Methylcrotonoyl-CoA carboxylase subunit alpha, mitochondrial OS=Homo sapiens OX=9606 GN=MCCC1 PE=1 SV=3	2	1	189	1	725	80.4	7.78	441.42	other metabolic processes	cytosol;mitochondrion;other cell component	other molecular function	Pf00289, Pf00364, Pf02785, Pf02786	56922	MCCC1	hsa:56922; Q59ES4; Q96RQ3; Q9H959; Q9NS97	ENSG00000078070	Amino acid metabolism	Biotin transport and metabolism; Branched-chain amino acid catabolism; Defective HLCS causes multiple carboxylase deficiency	501129	37850.4	99244.5	29671.3	85999.8	104817	935337	113012	8815.52	1.02098e+06	140840	31296.5	718950	131026	544690	673683	173972	98319.2	High	Peak Found	High	Peak Found	High	High	High	High	Not Found	High	High
High	P11498	Pyruvate carboxylase, mitochondrial OS=Homo sapiens OX=9606 GN=PC PE=1 SV=2	2	1	71	1	1178	129.6	6.84	182.13	other metabolic processes;other biological processes	cytosol;mitochondrion;other cell component	other molecular function	Pf00289, Pf00364, Pf00682, Pf02436, Pf02785, Pf02786	5091	PC	B4DN00; hsa:5091; P11498; Q16705	ENSG00000173599	Alanine and aspartate metabolism; TCA cycle and deficiency of pyruvate dehydrogenase complex (PDHc); Fatty acid biosynthesis; Amino acid metabolism; Glycolysis and gluconeogenesis	Gluconeogenesis; Biotin transport and metabolism; Defective HLCS causes multiple carboxylase deficiency	113414	18273.1	9645.31	11685	11666.9	10226.7	488485	9587.26	9489.99	631879	26046.7	11932.6	240364	14599.5	73249.7	311727	24323.1	19426.1	High	Peak Found	Not Found	Peak Found	Not Found	Not Found	High	Not Found	Not Found	High	High
High	P26196	Probable ATP-dependent RNA helicase DDX6 OS=Homo sapiens OX=9606 GN=DDX6 PE=1 SV=2	2	1	11	1	483	54.4	8.66	9.63	cell organization and biogenesis;other biological processes	cytosol;nucleus;other cell component	nucleic acid binding activity;other molecular function	Pf00270, Pf00271	1656	DDX6	hsa:1656; P26196; Q5D048	ENSG00000110367		mRNA decay by 5' to 3' exoribonuclease	2441.72	6693.79	8118.95	4550.49	8041.44	7642.23	2883.85	12529.1	11455	45024.5	40587.7	110430	44702.9	61266.6	46664.8	34744.5	49165.9	50570.9	Not Found	Peak Found	Peak Found	Peak Found	Peak Found	Peak Found	Not Found	Peak Found	High	Peak Found	High
High	P68371	Tubulin beta-4B chain OS=Homo sapiens OX=9606 GN=TUBB4B PE=1 SV=1	20	6	138	1	445	49.8	4.89	209.85	cell cycle OR cell proliferation;cell organization and biogenesis;stress response	non-structural extracellular;cytosol;cytoskeleton;other cytoplasmic organelle;other cell component	signal transduction activity or receptor binding;cytoskeletal activity;nucleic acid binding activity;other molecular function	Pf00091, Pf03953	10383	TUBB4B	A2BFA2; hsa:10383; P05217; P68371	ENSG00000188229	Alzheimer's disease and miRNA effects; Pathogenic Escherichia coli infection; Parkin-ubiquitin proteasomal system pathway; Alzheimer's disease	Neutrophil degranulation; RHO GTPases Activate Formins; HCMV Early Events; MHC class II antigen presentation; Recruitment of NuMA to mitotic centrosomes; Regulation of PLK1 Activity at G2/M Transition; Loss of Nlp from mitotic centrosomes; Recruitment of mitotic centrosome proteins and complexes; Anchoring of the basal body to the plasma membrane; AURKA Activation by TPX2; COPI-mediated anterogra…	17509.6	3852.52	3917.37	18343.1	1974.7	2170.4	19654.1	9274.72	5649.2	17273.4	9261.72	2525.38	13118.6	10261.6	12822.3	17866.3	14423.5	9982.27	Peak Found	Not Found	Not Found	High	Not Found	Not Found	High	High	High	High	High
High	O95166	Gamma-aminobutyric acid receptor-associated protein OS=Homo sapiens OX=9606 GN=GABARAP PE=1 SV=1	5	1	13	1	117	13.9	8.79	22.32	cell-cell signaling;cell organization and biogenesis;other metabolic processes;stress response;transport;signal transduction;other biological processes	plasma membrane;other membranes;cytosol;cytoskeleton;ER/Golgi;other cytoplasmic organelle;other cell component	signal transduction activity or receptor binding;cytoskeletal activity;other molecular function	Pf02991	11337	GABARAP	hsa:11337; O95166	ENSG00000170296	2q37 copy number variation syndrome	Macroautophagy; TBC/RABGAPs	8869.68	20810.1	9823.25	16344.4	26653.9	19499.8	9059.02	14789.7	23008.2	101316	147162	122042	169128	108891	110579	94692	125555	159247	Peak Found	Peak Found	Peak Found	Peak Found	Peak Found	Peak Found	Peak Found	Peak Found	Peak Found	High	High
High	Q12906	Interleukin enhancer-binding factor 3 OS=Homo sapiens OX=9606 GN=ILF3 PE=1 SV=3	7	4	41	4	894	95.3	8.76	79.27	protein metabolism;other metabolic processes;stress response;other biological processes	mitochondrion;nucleus;other cell component	nucleic acid binding activity	Pf00035, Pf07528	3609	ILF3	A8K6F2; G5E9M5; hsa:3609; O43409; Q12906; Q6P1X1; Q86XY7; Q99544; Q99545; Q9BZH4; Q9BZH5; Q9NQ95; Q9NQ96; Q9NQ97; Q9NQ98; Q9NQ99; Q9NQA0; Q9NQA1; Q9NQA2; Q9NRN2; Q9NRN3; Q9NRN4; Q9UMZ9; Q9UN00; Q9UN84; Q9UNA2	ENSG00000129351			31300.3	18243.9	22153.7	22668.3	14847.7	13546.3	54353.9	23875.3	21586.4	127035	53931.6	33070.6	112818	49199.4	84038.8	126071	36275.9	79664	Peak Found	Peak Found	Peak Found	Peak Found	Peak Found	Peak Found	High	Peak Found	High	High	High
High	Q03405	Urokinase plasminogen activator surface receptor OS=Homo sapiens OX=9606 GN=PLAUR PE=1 SV=1	7	1	7	1	335	37	6.65	19.56	stress response;signal transduction;other biological processes	non-structural extracellular;plasma membrane;other membranes;ER/Golgi;other cell component	signal transduction activity or receptor binding;other molecular function	Pf00021	5329	PLAUR	A8K409; hsa:5329; Q03405; Q12876; Q15845; Q16887; Q6IB52; Q9BWT0; Q9NYC8; Q9UD69; Q9UEA6; Q9UM92; Q9UMV0	ENSG00000011422	Primary focal segmental glomerulosclerosis (FSGS); Complement system; VEGFA-VEGFR2 signaling pathway; Complement and coagulation cascades	Neutrophil degranulation; Dissolution of Fibrin Clot; Attachment of GPI anchor to uPAR	2847.85	2402.19	3662.94	2421.44	1647.67	19942.3	3823.54	1421.67	2365.4	65699.8	11839.7	2215.61	21644.3	2157.58	13662.4	22233.4	3260.93	4567	Not Found	Not Found	Not Found	Not Found	Not Found	Peak Found	Not Found	Not Found	Not Found	High	High
High	Q8IWU6	Extracellular sulfatase Sulf-1 OS=Homo sapiens OX=9606 GN=SULF1 PE=1 SV=1	1	1	2	1	871	101	9.09	2.05	cell organization and biogenesis;protein metabolism;other metabolic processes;developmental processes;signal transduction;other biological processes	non-structural extracellular;plasma membrane;other membranes;ER/Golgi;other cell component	other molecular function	Pf00884, Pf12548	23213	SULF1	hsa:23213; Q86YV8; Q8IWU6; Q8NCA2; Q9UPS5	ENSG00000137573			2051.62	4097.13	3725.05	2529.77	4516.62	1566.53	2610.59	1786.16	5496.89	9978.15	10545.2	16880.4	11424.1	14102.2	15728.2	8269.74	11081.9	10084.3	Not Found	Not Found	Not Found	Not Found	Peak Found	Not Found	Not Found	Not Found	Peak Found	Peak Found	High
Medium	P0DI82	Trafficking protein particle complex subunit 2B OS=Homo sapiens OX=9606 GN=TRAPPC2B PE=1 SV=1	5	1	1	1	140	16.4	6.52	0	cell organization and biogenesis;transport;other biological processes	other membranes;ER/Golgi;nucleus;other cytoplasmic organelle;other cell component	other molecular function	Pf04628	6399	TRAPPC2B	A6NEG0; hsa:6399; O14582; P0DI82; Q9HD16	ENSG00000256060			3486.83	2997.51	3197.49	2579.64	4808.97	1532.5	3491.03	3654.02	3941.51	7206.52	10115.3	14125	8987.27	12727.6	15568.2	6553.71	10851.9	17320.6	Not Found	Not Found	Not Found	Not Found	Peak Found	Not Found	Not Found	Not Found	Not Found	Peak Found	Peak Found
High	Q07954	Prolow-density lipoprotein receptor-related protein 1 OS=Homo sapiens OX=9606 GN=LRP1 PE=1 SV=2	0	1	13	1	4544	504.3	5.39	18.22	other metabolic processes;stress response;transport;developmental processes;signal transduction;other biological processes	plasma membrane;other membranes;cytoskeleton;ER/Golgi;nucleus;other cytoplasmic organelle;other cell component	signal transduction activity or receptor binding;other molecular function	Pf00057, Pf00058, Pf07645, Pf12662, Pf14670, Pf16472	4035	LRP1	hsa:4035; Q07954; Q2PP12; Q86SW0; Q8IVG8	ENSG00000123384	Alzheimer's disease and miRNA effects; Regulation of Wnt / B-catenin signaling by small molecule compounds; Statin inhibition of cholesterol production; Familial hyperlipidemia type 1; Familial hyperlipidemia type 3; Familial hyperlipidemia type 4; Familial hyperlipidemia type 5; Alzheimer's disease	Scavenging of heme from plasma; Retinoid metabolism and transport	3090.07	2433.45	1542.31	2115.96	2815.14	3357.61	1703.06	3275.23	2682.11	18281.5	16399.8	18938.5	13736.6	13882.4	14203.9	10703.2	10942.9	18959.1	Not Found	Not Found	Not Found	Not Found	Not Found	Not Found	Not Found	Not Found	Not Found	High	High
High	P52209	6-phosphogluconate dehydrogenase, decarboxylating OS=Homo sapiens OX=9606 GN=PGD PE=1 SV=3	9	3	22	3	483	53.1	7.23	49.95	other metabolic processes	cytosol	other molecular function	Pf00393, Pf03446	5226	PGD	A8K2Y9; B4DQJ8; hsa:5226; P52209; Q9BWD8	ENSG00000142657	Pentose phosphate metabolism; Nuclear receptors meta-pathway; NRF2 pathway; VEGFA-VEGFR2 signaling pathway; Metabolic reprogramming in colon cancer	Nuclear events mediated by NFE2L2; Pentose phosphate pathway	8601.64	9639.72	7823.58	8546.25	11081	7774.4	7333.11	12673.7	13831.1	32759.6	30674.1	33079	27027.2	47260.9	41885.2	30630.9	54082.9	39269.2	Not Found	Not Found	Peak Found	Not Found	Peak Found	Not Found	Not Found	Peak Found	High	High	High
High	Q9H7M9	V-type immunoglobulin domain-containing suppressor of T-cell activation OS=Homo sapiens OX=9606 GN=VSIR PE=1 SV=3	4	1	5	1	311	33.9	6.95	8.19	protein metabolism;other metabolic processes;other biological processes	plasma membrane;other membranes	enzyme regulator activity;other molecular function	Pf07686	64115	VSIR	A1L0X9; A4ZYV1; A8MVH5; hsa:64115; Q6UXF3; Q8WUG3; Q8WYZ8; Q9H7M9	ENSG00000107738			3867.65	2684.54	2367.66	3146.85	2677.14	2936.04	15282.6	3089.09	2710.95	13688.6	3417.33	3531.48	18406.1	2370.68	14273.2	13736.7	3291.57	5143.48	Not Found	Not Found	Not Found	Not Found	Not Found	Not Found	High	Not Found	Not Found	Peak Found	Not Found
High	P15311	Ezrin OS=Homo sapiens OX=9606 GN=EZR PE=1 SV=4	5	3	29	3	586	69.4	6.27	29.59	cell adhesion;cell cycle OR cell proliferation;cell organization and biogenesis;transport;signal transduction;other biological processes	plasma membrane;other membranes;cytosol;cytoskeleton;nucleus;other cytoplasmic organelle;other cell component	cytoskeletal activity;other molecular function	Pf00373, Pf00769, Pf09379, Pf09380, Pf20492	7430	EZR	E1P5A8; hsa:7430; P15311; P23714; Q4VX75; Q96CU8; Q9NSJ4	ENSG00000092820	Pathogenic Escherichia coli infection; AGE/RAGE pathway; VEGFA-VEGFR2 signaling pathway; 16p11.2 proximal deletion syndrome; CCL18 signaling pathway; Regulation of actin cytoskeleton; GDNF signaling	Recycling pathway of L1; Sensory processing of sound by inner hair cells of the cochlea; Sensory processing of sound by outer hair cells of the cochlea; Netrin-1 signaling	4007.63	4157.95	3584.72	1784.11	3868.17	1927.53	2228.54	2967.31	2956.79	7123.38	7832.66	7737.09	7105.87	17910.2	9283.74	5121.86	7204.6	8227.1	High	High	High	High	Peak Found	High	High	Peak Found	High	High	High
High	Q14118	Dystroglycan 1 OS=Homo sapiens OX=9606 GN=DAG1 PE=1 SV=2	2	1	9	1	895	97.4	8.56	21.25	cell adhesion;cell-cell signaling;cell organization and biogenesis;protein metabolism;stress response;developmental processes;other biological processes	non-structural extracellular;extracellular matrix;plasma membrane;other membranes;cytosol;cytoskeleton;ER/Golgi;nucleus;other cell component	cytoskeletal activity;other molecular function	Pf05345, Pf05454, Pf18424	1605	DAG1	A8K6M7; hsa:1605; Q14118; Q969J9	ENSG00000173402	Arrhythmogenic right ventricular cardiomyopathy; Primary focal segmental glomerulosclerosis (FSGS); T-cell antigen receptor (TCR) pathway during Staphylococcus aureus infection; Acute viral myocarditis; Fragile X syndrome	ECM proteoglycans; Non-integrin membrane-ECM interactions; Regulation of expression of SLITs and ROBOs; O-linked glycosylation; EGR2 and SOX10-mediated initiation of Schwann cell myelination; Defective POMGNT1 causes MDDGA3, MDDGB3 and MDDGC3; Defective POMT2 causes MDDGA2, MDDGB2 and MDDGC2; Defective POMT1 causes MDDGA1, MDDGB1 and MDDGC1	15320.8	3392.08	1747.08	3073.69	2497.83	3861.3	22197.7	2646.77	2377.38	27297	5905.84	4092.14	27978.8	4770.71	13324.8	32108.4	2698.95	5641.28	Peak Found	Not Found	Not Found	Not Found	Not Found	Not Found	High	Not Found	Not Found	High	High
High	P35052	Glypican-1 OS=Homo sapiens OX=9606 GN=GPC1 PE=1 SV=2	5	2	14	2	558	61.6	7.3	25.23	cell organization and biogenesis;protein metabolism;other metabolic processes;developmental processes;other biological processes	non-structural extracellular;extracellular matrix;plasma membrane;other membranes;cytosol;ER/Golgi;nucleus;other cytoplasmic organelle;other cell component	other molecular function	Pf01153	2817	GPC1	B3KTD1; hsa:2817; P35052; Q53QM4	ENSG00000063660	VEGFA-VEGFR2 signaling pathway; 2q37 copy number variation syndrome	Cell surface interactions at the vascular wall; A tetrasaccharide linker sequence is required for GAG synthesis; HS-GAG biosynthesis; HS-GAG degradation; Defective B4GALT7 causes EDS, progeroid type; Defective B3GAT3 causes JDSSDHD; Defective EXT2 causes exostoses 2; Defective EXT1 causes exostoses 1, TRPS2 and CHDS; Defective B3GALT6 causes EDSP2 and SEMDJL1; Attachment and Entry; Retinoid metab…	4350.9	7853.87	9258.31	6533.61	9696.48	8520.87	9276.88	7665.18	12858.6	68508.2	75442.4	68766.3	35148.6	47061.7	34694.1	33655.3	57862	42503.5	Not Found	Peak Found	Peak Found	Not Found	Peak Found	Peak Found	Peak Found	High	High	High	High
High	P06756	Integrin alpha-V OS=Homo sapiens OX=9606 GN=ITGAV PE=1 SV=2	1	1	5	1	1048	116	5.68	10.19	cell adhesion;other metabolic processes;transport;developmental processes;signal transduction;other biological processes	plasma membrane;other membranes;cytosol;other cell component	signal transduction activity or receptor binding;transporter activity;other molecular function	Pf00357, Pf01839, Pf08441	3685	ITGAV	A0AV67; B0LPF4; B7Z883; B7ZLX0; D3DPG8; E7EWZ6; hsa:3685; P06756; Q53SK4; Q59EB7; Q6LD15	ENSG00000138448	Osteopontin signaling; Integrin-mediated cell adhesion; Arrhythmogenic right ventricular cardiomyopathy; Primary focal segmental glomerulosclerosis (FSGS); Focal adhesion; Osteoblast signaling; MFAP5-mediated ovarian cancer cell motility and invasiveness; VEGFA-VEGFR2 signaling pathway; Focal adhesion: PI3K-Akt-mTOR-signaling pathway; PI3K-Akt signaling pathway; Ebola virus infection in host; MFA…	Neutrophil degranulation; Integrin cell surface interactions; ECM proteoglycans; Syndecan interactions; Molecules associated with elastic fibres; Signal transduction by L1; Laminin interactions; TGF-beta receptor signaling activates SMADs; VEGFA-VEGFR2 Pathway; Cross-presentation of particulate exogenous antigens (phagosomes); PECAM1 interactions	3295.85	2178.08	2543.69	2153.47	4065.64	2628.33	12298.2	1843.01	3576.17	18971.4	3650.97	3922.58	20029	3041.95	10792.9	30489.8	2398.92	3244.72	Not Found	Not Found	Not Found	Not Found	Not Found	Not Found	High	Not Found	Not Found	High	Peak Found
High	P02768	Albumin OS=Homo sapiens OX=9606 GN=ALB PE=1 SV=2	6	3	21	3	609	69.3	6.28	25.07	stress response;other biological processes	non-structural extracellular;ER/Golgi;other cell component	nucleic acid binding activity;other molecular function	Pf00273	213	ALB	E7ESS9; hsa:213; O95574; P02768; P04277; Q13140; Q645G4; Q68DN5; Q6UXK4; Q86YG0; Q8IUK7; Q9P157; Q9P1I7; Q9UHS3; Q9UJZ0	ENSG00000163631	Selenium micronutrient network; Vitamin B12 metabolism; Folate metabolism; Complement system; VEGFA-VEGFR2 signaling pathway	Scavenging of heme from plasma; Regulation of Insulin-like Growth Factor (IGF) transport and uptake by Insulin-like Growth Factor Binding Proteins (IGFBPs); Post-translational protein phosphorylation; Platelet degranulation ; Cytoprotection by HMOX1; Aspirin ADME; Recycling of bile acids and salts; Heme degradation; HDL remodeling; Heme biosynthesis	16970.4	26412	18394.3	12183.9	17101.1	7982.08	16521.6	18276.3	20355.3	26180.3	31483.9	24377.6	38363.1	58822.3	49923.7	38176.6	50927.9	34841.7	Peak Found	Peak Found	Peak Found	Peak Found	High	Peak Found	Peak Found	High	High	High	High
High	P19022	Cadherin-2 OS=Homo sapiens OX=9606 GN=CDH2 PE=1 SV=4	3	2	10	2	906	99.7	4.81	16.72	cell adhesion;cell organization and biogenesis;developmental processes;other biological processes	plasma membrane;other membranes;ER/Golgi;other cell component	nucleic acid binding activity;other molecular function	Pf00028, Pf01049, Pf08758	1000	CDH2	A8MWK3; B0YIY6; hsa:1000; P19022; Q14923; Q8N173	ENSG00000170558	Neural crest differentiation; Arrhythmogenic right ventricular cardiomyopathy; Brain-derived neurotrophic factor (BDNF) signaling pathway; Primary focal segmental glomerulosclerosis (FSGS); Splicing factor NOVA regulated synaptic proteins; Epithelial to mesenchymal transition in colorectal cancer; Hippo signaling regulation pathways; Hippo-Merlin signaling dysregulation; Malignant pleural mesothe…	Myogenesis; Regulation of Insulin-like Growth Factor (IGF) transport and uptake by Insulin-like Growth Factor Binding Proteins (IGFBPs); Post-translational protein phosphorylation; Adherens junctions interactions	5055.57	6554.48	6461.54	6615.53	4934.21	4983.34	7054.36	7692.05	6019.57	21709.8	9878.17	9884.82	22111.8	7629.98	20408.2	23703.7	5126.02	24669	Not Found	Not Found	Not Found	Not Found	Not Found	Not Found	Peak Found	Not Found	Not Found	High	High
High	P27694	Replication protein A 70 kDa DNA-binding subunit OS=Homo sapiens OX=9606 GN=RPA1 PE=1 SV=2	3	1	6	1	616	68.1	7.21	2.14	cell cycle OR cell proliferation;cell organization and biogenesis;DNA metabolism;other metabolic processes;stress response;other biological processes	nucleus;other cell component	nucleic acid binding activity;other molecular function	Pf01336, Pf04057, Pf08646, Pf16900	6117	RPA1	A8K0Y9; hsa:6117; P27694; Q59ES9	ENSG00000132383	Homologous recombination; Retinoblastoma gene in cancer; ATR signaling; G1 to S cell cycle control; DNA replication; Nucleotide excision repair; DNA repair pathways, full network; Nucleotide excision repair in xeroderma pigmentosum ; DNA mismatch repair	Processing of DNA double-strand break ends; G2/M DNA damage checkpoint; Meiotic recombination; HSF1 activation; SUMOylation of DNA damage response and repair proteins; Formation of Incision Complex in GG-NER; Dual Incision in GG-NER; Fanconi Anemia Pathway; Regulation of TP53 Activity through Phosphorylation; Termination of translesion DNA synthesis; HDR through Homologous Recombination (HRR); Du…	4000.62	2387.22	3285.59	2454.52	11226.6	1882.55	14246.7	2290.15	6545.92	2869.58	8245.25	13976.5	7461.54	9887.93	11132.8	1718.4	11599.5	11105.9	Not Found	Not Found	Not Found	Not Found	Peak Found	Not Found	Peak Found	Not Found	High	Not Found	Peak Found
High	P62081	40S ribosomal protein S7 OS=Homo sapiens OX=9606 GN=RPS7 PE=1 SV=1	9	2	9	2	194	22.1	10.1	15.71	protein metabolism;RNA metabolism OR transcription;other metabolic processes;developmental processes;other biological processes	cytosol;cytoskeleton;translational apparatus;nucleus;other cell component	enzyme regulator activity;nucleic acid binding activity;other molecular function	Pf01251	6201	RPS7	hsa:6201; P23821; P24818; P62081; Q57Z92; Q6IPH1	ENSG00000171863	Cytoplasmic ribosomal proteins	Regulation of expression of SLITs and ROBOs; Nonsense Mediated Decay (NMD) enhanced by the Exon Junction Complex (EJC); L13a-mediated translational silencing of Ceruloplasmin expression; Formation of a pool of free 40S subunits; GTP hydrolysis and joining of the 60S ribosomal subunit; Major pathway of rRNA processing in the nucleolus and cytosol; SRP-dependent cotranslational protein targeting to…	5103.34	4317.85	4503.7	5626.56	10541.4	5883.28	10147.5	9721.41	11282.4	15207.8	11433.5	17047.8	14069.1	22666.7	21890.8	11076.6	18431.4	14061	Not Found	Not Found	Not Found	Not Found	Peak Found	Not Found	Peak Found	Peak Found	Peak Found	High	High
High	P16401	Histone H1.5 OS=Homo sapiens OX=9606 GN=H1-5 PE=1 SV=3	24	4	13	2	226	22.6	10.92	23.2	cell organization and biogenesis;other biological processes	nucleus;other cell component	nucleic acid binding activity;other molecular function	Pf00538	3009	H1-5	hsa:3009; P16401; Q14529; Q3MJ42	ENSG00000184357		Apoptosis induced DNA fragmentation; Formation of Senescence-Associated Heterochromatin Foci (SAHF)	6953.52	8337.34	5418.09	6201.64	4996.89	5631.66	4964.94	4945.72	7572.02	18210.1	22230	20987.4	21266.6	15123.3	20944.8	14025.2	22276	22680.5	Not Found	Not Found	Not Found	Not Found	Not Found	High	Not Found	Not Found	Not Found	Not Found	Not Found
High	O43660	Pleiotropic regulator 1 OS=Homo sapiens OX=9606 GN=PLRG1 PE=1 SV=1	8	3	36	3	514	57.2	9.17	25.22	RNA metabolism OR transcription;other metabolic processes;other biological processes	other membranes;nucleus;other cell component		Pf00400	5356	PLRG1	B3KMK4; hsa:5356; O43660; Q3KQY5; Q8WUD8	ENSG00000171566		mRNA Splicing - Major Pathway	38254.4	44526	46858.7	31823	21431.1	14263.9	22920.7	33558.3	41856.9	47711	46435.8	60597.5	48493.9	97213	75592.3	50080.1	69824.3	47580.3	High	High	High	High	High	High	High	High	High	High	High
High	Q15717	ELAV-like protein 1 OS=Homo sapiens OX=9606 GN=ELAVL1 PE=1 SV=2	3	1	9	1	326	36.1	9.17	16.99	cell organization and biogenesis;transport;other biological processes	cytosol;ER/Golgi;nucleus;other cell component	nucleic acid binding activity;other molecular function	Pf00076	1994	ELAVL1	B4DVB8; hsa:1994; Q15717; Q53XN6; Q9BTT1	ENSG00000066044	AMP-activated protein kinase (AMPK) signaling; Endoderm differentiation; Pre-implantation embryo; Focal adhesion: PI3K-Akt-mTOR-signaling pathway; ncRNAs involved in Wnt signaling in hepatocellular carcinoma; Gastrin signaling pathway; IL-18 signaling pathway; NAD metabolism in oncogene-induced senescence and mitochondrial dysfunction-associated senescence	mRNA Splicing - Major Pathway; HuR (ELAVL1) binds and stabilizes mRNA	2875.07	3417.8	3549.23	2248.86	2933.34	2003.6	2812.78	2503.18	1503.48	3978.71	5097.53	8355.01	10462.1	7089.84	7781.17	5765.38	5396.01	12732.5	Not Found	Not Found	Not Found	Not Found	Not Found	Not Found	Not Found	Not Found	Not Found	High	High
High	P01889	HLA class I histocompatibility antigen, B alpha chain OS=Homo sapiens OX=9606 GN=HLA-B PE=1 SV=3	19	4	24	3	362	40.4	5.85	44.03	stress response;other biological processes	plasma membrane;other membranes;ER/Golgi;other cytoplasmic organelle;other cell component	signal transduction activity or receptor binding;other molecular function	Pf00129, Pf06623, Pf07654	3106	HLA-B	A0A2I6Q7B5; B0V0B8; G3GN01; hsa:3106; O02862; O02956; O02957; O02960; O19555; O19556; O19595; O19615; O19624; O19625; O19627; O19641; O19651; O19675; O19692; O19758; O19779; O19783; O46702; O62897; O62901; O62915; O62917; O62919; O77933; O77959; O78053; O78138; O78160; O78163; O78172; O78173; O78180; O78217; O95730; O98140; P01889; P01890; P03989; P10317; P10318; P10319; P10320; P18463; P18464; P…	ENSG00000234745	Proteasome degradation; Allograft rejection; Ebola virus infection in host; Type II interferon signaling	Immunoregulatory interactions between a Lymphoid and a non-Lymphoid cell; DAP12 interactions; Neutrophil degranulation; ER-Phagosome pathway; SARS-CoV-2 activates/modulates innate and adaptive immune responses; Interferon gamma signaling; Interferon alpha/beta signaling; Antigen Presentation: Folding, assembly and peptide loading of class I MHC; Endosomal/Vacuolar pathway	12896.8	12131.5	6337.53	7855.03	12223.6	6099.66	41908.1	10075.4	10809.3	41403.1	10854.3	28696.3	54323.9	11477.6	27017.3	39656.4	18845.2	17125.1	Peak Found	Peak Found	Not Found	Not Found	Peak Found	Not Found	High	Peak Found	High	High	High
High	Q6EMK4	Vasorin OS=Homo sapiens OX=9606 GN=VASN PE=1 SV=1	2	1	7	1	673	71.7	7.39	7.5	stress response;other biological processes	non-structural extracellular;extracellular matrix;plasma membrane;other membranes;mitochondrion;other cell component	other molecular function	Pf00008, Pf13855	114990	VASN	hsa:114990; Q6EMK4; Q6UXL4; Q6UXL5; Q96CX1	ENSG00000168140; ENSG00000274334			1765.71	1776.19	3382.94	1829.99	2156.33	3665.43	6527.56	2368.68	3161.94	5711.59	4037.5	4730.42	7332.46	7222.58	6702.97	5596.7	4200	5193.16	Not Found	Not Found	Not Found	Not Found	Not Found	Not Found	Peak Found	Not Found	Not Found	High	High
High	Q13308	Inactive tyrosine-protein kinase 7 OS=Homo sapiens OX=9606 GN=PTK7 PE=1 SV=2	3	2	12	2	1070	118.3	7.09	13.88	cell adhesion;cell-cell signaling;cell organization and biogenesis;stress response;developmental processes;signal transduction;other biological processes	plasma membrane;other membranes;other cell component	kinase activity;other molecular function	Pf07679, Pf07714, Pf13927	5754	PTK7	A8K974; B7Z477; E9PFZ5; hsa:5754; Q13308; Q13417; Q5T650; Q6IQ54; Q8NFA5; Q8NFA6; Q8NFA7; Q8NFA8	ENSG00000112655			4684.49	6748.94	10188	6352.73	7843.72	3773.86	23388.5	4420.55	9962.64	37099.6	18532.4	28112.9	29109.1	18556.7	21141	30822.1	26449.2	20876.5	Not Found	Not Found	Peak Found	Not Found	Not Found	Not Found	Peak Found	Not Found	Peak Found	High	High
High	O60513	Beta-1,4-galactosyltransferase 4 OS=Homo sapiens OX=9606 GN=B4GALT4 PE=1 SV=1	6	1	4	1	344	40	9.07	13.28	protein metabolism;other metabolic processes	other membranes;ER/Golgi	other molecular function	Pf02709, Pf13733	8702	B4GALT4	hsa:8702; O60513; Q68D68; Q9BSW3; Q9C078	ENSG00000121578		N-Glycan antennae elongation; Keratan sulfate biosynthesis	1622.37	1649.84	3157.26	3891.34	2693.35	1665.79	3871.67	3059.99	3509.8	16821.1	3598.5	2880.78	11807.5	1550.91	8942.31	19524.9	1644.86	3560.99	Not Found	Not Found	Not Found	Not Found	Not Found	Not Found	Peak Found	Not Found	Not Found	High	Not Found
High	Q99714	3-hydroxyacyl-CoA dehydrogenase type-2 OS=Homo sapiens OX=9606 GN=HSD17B10 PE=1 SV=3	8	1	7	1	261	26.9	7.78	6.81	cell organization and biogenesis;RNA metabolism OR transcription;other metabolic processes	plasma membrane;other membranes;mitochondrion;other cell component	nucleic acid binding activity;other molecular function	Pf00106	3028	HSD17B10	hsa:3028; Q5H927; Q6IBS9; Q8TCV9; Q96HD5; Q99714	ENSG00000072506	Alzheimer's disease and miRNA effects; Valproic acid pathway; Tryptophan metabolism; Alzheimer's disease	Branched-chain amino acid catabolism; tRNA processing in the mitochondrion; tRNA modification in the mitochondrion; rRNA processing in the mitochondrion	3390.56	2466.27	2576.33	3839.63	3256.92	1925.87	6848.9	3734.15	2335.35	8937.85	3494	3243.92	11045.5	4107.95	10674.2	27150.4	3519.28	2012.01	Not Found	Not Found	Not Found	Not Found	Not Found	Not Found	High	Not Found	Not Found	High	Not Found
High	P60903	Protein S100-A10 OS=Homo sapiens OX=9606 GN=S100A10 PE=1 SV=2	14	2	5	2	97	11.2	7.37	9.8	cell organization and biogenesis;RNA metabolism OR transcription;other metabolic processes;transport;other biological processes	non-structural extracellular;plasma membrane;other membranes;nucleus;other cell component	other molecular function	Pf01023	6281	S100A10	A8K4V8; hsa:6281; P08206; P60903; Q5T1C5	ENSG00000197747	Prostaglandin synthesis and regulation	Dissolution of Fibrin Clot	8875.56	8635.75	12639.1	7174.55	5364	7587.53	6751.8	9455.19	11470.6	22243.7	23772.7	25413.9	18149.4	23492	28228.3	15035.7	25698.5	23880.4	Peak Found	Peak Found	Peak Found	Peak Found	Not Found	Not Found	Peak Found	Peak Found	High	High	Peak Found
High	P61764	Syntaxin-binding protein 1 OS=Homo sapiens OX=9606 GN=STXBP1 PE=1 SV=1	2	1	1	1	594	67.5	6.96	1.67	cell adhesion;cell-cell signaling;cell organization and biogenesis;stress response;transport;developmental processes;other biological processes	plasma membrane;other membranes;cytosol;cytoskeleton;mitochondrion;nucleus;other cell component	other molecular function	Pf00995	6812	STXBP1	B1AM97; hsa:6812; P61764; Q28208; Q62759; Q64320; Q68CM6; Q96TG8	ENSG00000136854	Synaptic vesicle pathway; Rett syndrome causing genes; EGF/EGFR signaling pathway; Insulin signaling	Regulation of insulin secretion; Neurexins and neuroligins	2191.8	2749.98	3139.57	1875.04	1556.29	2831.19	2841.66	3566.81	2647.45	3987.85	5020.92	7058.01	6110.96	6562.36	4332.74	7342.12	5972.17	6132.44	Not Found	Not Found	Not Found	Not Found	Not Found	Not Found	Not Found	Not Found	Not Found	Peak Found	Peak Found
High	P52803	Ephrin-A5 OS=Homo sapiens OX=9606 GN=EFNA5 PE=1 SV=1	8	1	7	1	228	26.3	6.42	10.36	cell adhesion;cell organization and biogenesis;developmental processes;signal transduction;other biological processes	extracellular matrix;plasma membrane;other membranes;other cell component	signal transduction activity or receptor binding;enzyme regulator activity	Pf00812	1946	EFNA5	hsa:1946; P52803	ENSG00000184349	Vitamin D receptor pathway; Focal adhesion: PI3K-Akt-mTOR-signaling pathway; Splicing factor NOVA regulated synaptic proteins; PI3K-Akt signaling pathway; Cell migration and invasion through p75NTR; Malignant pleural mesothelioma	EPH-ephrin mediated repulsion of cells; EPHA-mediated growth cone collapse	5824.02	6603.31	6518.9	6384.09	6383.29	6287.3	3895.29	6031.54	5819	30139.5	46703.6	77173.6	20299.3	18358	37381.9	13692.4	28719.4	35591.9	Not Found	Not Found	Not Found	Not Found	Not Found	Not Found	Not Found	Not Found	Not Found	Peak Found	High
High	Q9UGI8	Testin OS=Homo sapiens OX=9606 GN=TES PE=1 SV=1	3	1	3	1	421	48	7.68	5.59	other biological processes	plasma membrane;other membranes;cytosol;other cell component	other molecular function	Pf00412, Pf06297	26136	TES	A4D0U6; hsa:26136; Q9GZQ1; Q9HAJ9; Q9UGI8	ENSG00000135269			2745.41	11111.2	2387	2869.13	10936.3	3762.08	3658.31	8032.09	10314.5	1716.65	7616.44	14303.8	16624.5	11735.9	10715	9368.07	10527.6	9695.09	Not Found	Peak Found	Not Found	Not Found	Peak Found	Not Found	Not Found	Peak Found	High	Not Found	High
High	Q96PD2	Discoidin, CUB and LCCL domain-containing protein 2 OS=Homo sapiens OX=9606 GN=DCBLD2 PE=1 SV=1	1	1	4	1	775	85	7.17	3.5	stress response;signal transduction;other biological processes	plasma membrane;other membranes;other cell component		Pf00431, Pf00754, Pf03815	131566	DCBLD2	B7WNL1; D3DN41; hsa:131566; Q8N6M4; Q8TDX2; Q96PD2	ENSG00000057019			1547.23	1410.37	3220.85	1669.63	2884.87	3598.88	2866.57	3412.75	3917.89	5159.04	6209.86	8192.08	5791.38	9855.98	8957.75	3519.34	10003	6810.43	Not Found	Not Found	Not Found	Not Found	Not Found	Not Found	Not Found	Not Found	Not Found	High	High
High	P26599	Polypyrimidine tract-binding protein 1 OS=Homo sapiens OX=9606 GN=PTBP1 PE=1 SV=1	6	3	13	3	531	57.2	9.17	13.34	RNA metabolism OR transcription;other metabolic processes;other biological processes	nucleus	nucleic acid binding activity	Pf00076, Pf13893	5725	PTBP1	hsa:5725; P26599; Q9BUQ0	ENSG00000011304	mir-124 predicted interactions with cell cycle and differentiation ; mRNA processing	mRNA Splicing - Major Pathway; Processing of Capped Intron-Containing Pre-mRNA; FGFR2 alternative splicing	8837.86	8551.91	9106.9	25587.2	21444.7	18357.6	10755.8	20661.6	19874.2	89551	59939.8	63529.1	57815.4	65455.1	90443.5	51280.2	56989.5	118773	Not Found	Not Found	Not Found	Peak Found	Peak Found	Peak Found	Not Found	Peak Found	Peak Found	High	High
High	Q9Y5A9	YTH domain-containing family protein 2 OS=Homo sapiens OX=9606 GN=YTHDF2 PE=1 SV=2	2	1	5	1	579	62.3	8.79	10.23	cell cycle OR cell proliferation;cell organization and biogenesis;RNA metabolism OR transcription;other metabolic processes;stress response;developmental processes;other biological processes	cytosol;cytoskeleton;nucleus;other cell component	nucleic acid binding activity	Pf04146	51441	YTHDF2	A6NKG4; A8K966; B4E1G7; D3DPM8; hsa:51441; Q5VSZ9; Q8TDH0; Q9BUJ5; Q9Y5A9	ENSG00000198492			3889.57	3265.66	2809.21	1663.89	2842.64	1956.76	2578.29	2678.03	3682.23	8660.71	5593.84	3705.54	2971.2	8669.02	5961.43	18053.4	3595.68	4807.41	Not Found	Not Found	Not Found	Not Found	Not Found	Not Found	Not Found	Not Found	Not Found	High	High
High	P50895	Basal cell adhesion molecule OS=Homo sapiens OX=9606 GN=BCAM PE=1 SV=2	4	2	12	2	628	67.4	5.81	11.63	cell adhesion;signal transduction	plasma membrane;other membranes	other molecular function	Pf07686, Pf08205, Pf13895, Pf13927	4059	BCAM	A8MYF9; A9YWT5; A9YWT6; hsa:4059; P50895; Q86VC7	ENSG00000187244			13158.2	11649.1	8210.78	20075.5	8205.94	5459.29	16621.4	9077.21	10990.6	14635.3	15784.7	23177.8	24762.3	27591.6	16769.9	11048.5	19537.7	18366.8	Peak Found	Peak Found	Peak Found	High	Peak Found	Not Found	Peak Found	Peak Found	High	High	High
High	P17936	Insulin-like growth factor-binding protein 3 OS=Homo sapiens OX=9606 GN=IGFBP3 PE=1 SV=2	9	2	47	2	291	31.7	8.69	83.24	protein metabolism;other metabolic processes;other biological processes	non-structural extracellular;ER/Golgi;nucleus	enzyme regulator activity;other molecular function	Pf00086, Pf00219	3486	IGFBP3	A4D2F5; D3DVM0; hsa:3486; P17936; Q2V509; Q6P1M6; Q9UCL4	ENSG00000146674	Vitamin D receptor pathway; Myometrial relaxation and contraction pathways; Photodynamic therapy-induced HIF-1 survival signaling; VEGFA-VEGFR2 signaling pathway; 16p11.2 proximal deletion syndrome	Regulation of Insulin-like Growth Factor (IGF) transport and uptake by Insulin-like Growth Factor Binding Proteins (IGFBPs); Post-translational protein phosphorylation; TP53 Regulates Transcription of Death Receptors and Ligands	132948	55113.1	72526.2	88938.7	32314.9	66540	104221	76138.7	70930.7	176949	269476	113070	218407	122631	197846	186176	92132.5	149679	High	High	High	High	Peak Found	High	High	High	High	High	High
High	P04439	HLA class I histocompatibility antigen, A alpha chain OS=Homo sapiens OX=9606 GN=HLA-A PE=1 SV=2	15	4	53	2	365	40.8	6	109.7	stress response;signal transduction;other biological processes	plasma membrane;other membranes;ER/Golgi;other cytoplasmic organelle;other cell component	signal transduction activity or receptor binding;other molecular function	Pf00129, Pf06623, Pf07654	3105	HLA-A	B1PKZ3; hsa:3105; O02939; O02954; O02955; O02963; O19509; O19546; O19598; O19605; O19606; O19619; O19647; O19673; O19687; O19695; O19756; O19794; O19795; O43906; O43907; O46874; O62921; O62924; O77937; O77938; O77964; O78073; O78171; O98009; O98010; O98011; O98137; P01891; P01892; P04439; P05534; P06338; P10313; P10314; P10315; P10316; P13746; P16188; P16189; P16190; P18462; P30443; P30444; P3044…	ENSG00000206503	Proteasome degradation; Allograft rejection; Ebola virus infection in host; Cancer immunotherapy by PD-1 blockade	Immunoregulatory interactions between a Lymphoid and a non-Lymphoid cell; Neutrophil degranulation; ER-Phagosome pathway; SARS-CoV-2 activates/modulates innate and adaptive immune responses; Interferon gamma signaling; Interferon alpha/beta signaling; Antigen Presentation: Folding, assembly and peptide loading of class I MHC; Endosomal/Vacuolar pathway; E3 ubiquitin ligases ubiquitinate target pr…	56113.2	37044.2	48867.3	73464.7	20986.4	28275.8	49755.4	32414.4	33548.9	98172.2	72662.5	46628	115265	63385.3	83071.4	86522.3	53365.7	79602	High	Peak Found	High	High	Peak Found	Peak Found	High	High	Peak Found	High	High
High	P49327	Fatty acid synthase OS=Homo sapiens OX=9606 GN=FASN PE=1 SV=3	2	5	17	5	2511	273.3	6.44	15.18	other metabolic processes;stress response;developmental processes;other biological processes	plasma membrane;other membranes;cytosol;ER/Golgi;other cell component	other molecular function	Pf00107, Pf00109, Pf00550, Pf00698, Pf00975, Pf02801, Pf08242, Pf08659, Pf14765, Pf16197	2194	FASN	hsa:2194; P49327; Q13479; Q16702; Q4LE83; Q6P4U5; Q6SS02; Q969R1; Q96C68; Q96IT0	ENSG00000169710	AMP-activated protein kinase (AMPK) signaling; Sterol regulatory element-binding proteins (SREBP) signaling; SREBF and miR33 in cholesterol and lipid homeostasis; Liver X receptor pathway; Nuclear receptors meta-pathway; Fatty acid biosynthesis; Angiopoietin-like protein 8 regulatory pathway; Lipid metabolism pathway; Clear cell renal cell carcinoma pathways; Metabolic reprogramming in colon canc…	Vitamin B5 (pantothenate) metabolism; ChREBP activates metabolic gene expression; Activation of gene expression by SREBF (SREBP); Fatty acyl-CoA biosynthesis; NR1H2 & NR1H3 regulate gene expression linked to lipogenesis	3093.58	5319.42	4898.33	4565.09	6068.38	6240.83	9198.02	6141.9	8072.58	21523.7	5657.01	5361.55	23975.1	6638.99	17819.9	16280.4	5852.27	3460.44	High	Peak Found	Peak Found	High	Peak Found	Peak Found	High	Peak Found	Peak Found	High	Peak Found
High	P39060	Collagen alpha-1(XVIII) chain OS=Homo sapiens OX=9606 GN=COL18A1 PE=1 SV=5	1	2	7	2	1754	178.1	6.01	5.88	cell adhesion;cell organization and biogenesis;developmental processes;other biological processes	extracellular matrix;ER/Golgi;other cell component	extracellular structural activity;other molecular function	Pf01391, Pf01392, Pf06121, Pf06482, Pf20010	80781	COL18A1	A8MVI4; hsa:80781; P39060; Q58EX6; Q6RZ39; Q6RZ40; Q6RZ41; Q8N4S4; Q8WXI5; Q96T70; Q9UK38; Q9Y6Q7; Q9Y6Q8	ENSG00000182871		Integrin cell surface interactions; Laminin interactions; Collagen degradation; Assembly of collagen fibrils and other multimeric structures; Collagen chain trimerization; Activation of Matrix Metalloproteinases	12943	3434.71	5357.23	11126.2	16305.2	6464.55	13108.5	35783.2	12795.4	18036.1	13628.4	42922.8	27270.9	31959.6	33265	12576.7	19885.6	20663.3	Peak Found	Not Found	Not Found	Peak Found	Peak Found	Not Found	High	Peak Found	Peak Found	High	High
High	P00918	Carbonic anhydrase 2 OS=Homo sapiens OX=9606 GN=CA2 PE=1 SV=2	18	4	53	4	260	29.2	7.4	75.7	other metabolic processes;transport;signal transduction;other biological processes	plasma membrane;other membranes;cytosol;other cell component	other molecular function	Pf00194	760	CA2	B2R7G8; hsa:760; P00918; Q6FI12; Q96ET9	ENSG00000104267	Proximal tubule transport	Reversible hydration of carbon dioxide; Erythrocytes take up carbon dioxide and release oxygen; Erythrocytes take up oxygen and release carbon dioxide	79435.6	58928.7	81138.3	43181.4	77701	64407.9	99246.8	40730.4	55204.8	122289	113040	156472	105014	196379	180718	108757	134053	193438	High	High	High	High	High	High	High	High	High	High	High
High	Q12913	Receptor-type tyrosine-protein phosphatase eta OS=Homo sapiens OX=9606 GN=PTPRJ PE=1 SV=3	1	1	6	1	1337	145.9	5.58	4.31	protein metabolism;other metabolic processes;developmental processes;signal transduction;other biological processes	plasma membrane;other membranes;other cell component	signal transduction activity or receptor binding;other molecular function	Pf00041, Pf00102, Pf18861	5795	PTPRJ	hsa:5795; Q12913; Q15255; Q6P4H4; Q8NHM2; Q9UDA9	ENSG00000149177	VEGFA-VEGFR2 signaling pathway	Neutrophil degranulation; Negative regulation of MET activity; Negative regulation of FLT3; Phosphorylation of CD3 and TCR zeta chains	8337.95	2756.84	2972.16	2267.32	1488.52	3760.01	8431.49	2523.02	1465.84	6788.68	4641.59	2512.46	6346.01	2913.38	9414.43	6047.66	3086.49	3259.13	Peak Found	Not Found	Not Found	Not Found	Not Found	Not Found	Peak Found	Not Found	Not Found	Peak Found	High
High	Q14126	Desmoglein-2 OS=Homo sapiens OX=9606 GN=DSG2 PE=1 SV=2	4	4	24	4	1118	122.2	5.24	41.42	cell adhesion;cell organization and biogenesis;developmental processes;other biological processes	plasma membrane;other membranes;other cell component	other molecular function	Pf00028	1829	DSG2	hsa:1829; Q14126; Q4KKU6	ENSG00000046604	Arrhythmogenic right ventricular cardiomyopathy; GDNF signaling	RHOG GTPase cycle; RAC2 GTPase cycle; RAC3 GTPase cycle; Formation of the cornified envelope; Apoptotic cleavage of cell adhesion proteins	17906.1	25331.3	40876.8	29380.6	32417.5	31995.5	16615	24697.5	31043.8	76000.2	104421	145184	83676.5	89406.1	105224	73028	123324	106763	Peak Found	Peak Found	Peak Found	High	Peak Found	High	Peak Found	High	High	High	High
High	O94856	Neurofascin OS=Homo sapiens OX=9606 GN=NFASC PE=1 SV=4	2	3	10	3	1347	149.9	6.65	11.62	cell adhesion;cell organization and biogenesis;developmental processes;other biological processes	plasma membrane;other membranes;other cell component	other molecular function	Pf00041, Pf00047, Pf07679, Pf13882, Pf13927	23114	NFASC	B2RNN8; B3KQZ1; B5MDP6; B5MDR6; B7ZMD8; hsa:23114; O94856; Q149P5; Q5T2F0; Q5T2F1; Q5T2F2; Q5T2F3; Q5T2F4; Q5T2F5; Q5T2F6; Q5T2F7; Q5T2F9; Q5T2G0; Q5W9F8; Q68DH3; Q6ZQV6; Q7Z3K1; Q96HT1; Q96K50	ENSG00000163531		Neutrophil degranulation; Neurofascin interactions; Interaction between L1 and Ankyrins	19570.8	15771.1	14289.1	14301.2	12337.5	12683.2	14394.3	18866.6	22333.6	25051.2	19468	26342.1	41443.2	34939.7	25004	19410.3	28139.9	32890.5	Peak Found	Peak Found	Peak Found	Peak Found	Peak Found	High	Peak Found	Peak Found	Peak Found	Peak Found	High
High	O43854	EGF-like repeat and discoidin I-like domain-containing protein 3 OS=Homo sapiens OX=9606 GN=EDIL3 PE=1 SV=1	11	4	56	4	480	53.7	7.28	70.56	cell adhesion;other biological processes		signal transduction activity or receptor binding;other molecular function	Pf00008, Pf00754, Pf12661	10085	EDIL3	B2R763; hsa:10085; O43854; O43855; Q5D094; Q8N610	ENSG00000164176			35412.7	23562.4	23160.6	12251.6	21009.1	18168.2	42871.6	22634.2	21515.6	43163.7	22480.3	23692.6	49477.2	29084.9	62890.8	40606.5	48257.4	23225.7	High	High	High	High	High	High	High	High	High	High	High
High	P12429	Annexin A3 OS=Homo sapiens OX=9606 GN=ANXA3 PE=1 SV=3	11	3	36	3	323	36.4	5.92	71.5	stress response;transport;developmental processes;other biological processes	plasma membrane;other membranes;other cell component	enzyme regulator activity;other molecular function	Pf00191	306	ANXA3	B2R9W6; hsa:306; P12429; Q6LET2	ENSG00000138772	Prostaglandin synthesis and regulation		2398.34	4626.3	3793.4	2274.63	1918.6	4020.45	5896	4360.88	3059.41	7086.21	3271.24	3114.52	8821.1	4418.59	6193.01	3837.61	2819.96	5986.35	High	Peak Found	High	High	High	Peak Found	High	High	High	High	High
High	P07093	Glia-derived nexin OS=Homo sapiens OX=9606 GN=SERPINE2 PE=1 SV=1	3	1	6	1	398	44	9.29	7.67	cell organization and biogenesis;stress response;transport;developmental processes;other biological processes	non-structural extracellular;extracellular matrix;plasma membrane;other membranes;cytosol;other cell component	signal transduction activity or receptor binding;enzyme regulator activity;other molecular function	Pf00079	5270	SERPINE2	B2R6A4; B4DIF2; hsa:5270; P07093; Q53S15; Q5D0C4	ENSG00000135919		Intrinsic Pathway of Fibrin Clot Formation; Common Pathway of Fibrin Clot Formation; Dissolution of Fibrin Clot	3059.8	4177.75	2790.81	1623.85	3871.3	2805.44	3631.43	3358.57	2200.34	7000.93	7305.31	11211.8	7172.29	14057.7	7510.51	1737.26	11700.4	9830.66	Not Found	Not Found	Not Found	Not Found	Not Found	Not Found	Not Found	Not Found	Not Found	High	High
High	Q13501	Sequestosome-1 OS=Homo sapiens OX=9606 GN=SQSTM1 PE=1 SV=1	8	3	9	3	440	47.7	5.22	10.56	cell cycle OR cell proliferation;cell organization and biogenesis;protein metabolism;other metabolic processes;stress response;transport;signal transduction;other biological processes	cytosol;cytoskeleton;mitochondrion;ER/Golgi;nucleus;other cytoplasmic organelle;other cell component	signal transduction activity or receptor binding;kinase activity;other molecular function	Pf00564, Pf00569, Pf16577	8878	SQSTM1	A6NFN7; B2R661; B3KUW5; hsa:8878; Q13446; Q13501; Q9BUV7; Q9BVS6; Q9UEU1	ENSG00000161011	IL-1 signaling pathway; RANKL/RANK signaling pathway; Brain-derived neurotrophic factor (BDNF) signaling pathway; Apoptosis-related network due to altered Notch3 in ovarian cancer; Nuclear receptors meta-pathway; NRF2 pathway; Interleukin-1 induced activation of NF-kB; Clear cell renal cell carcinoma pathways; CAMKK2 pathway; 7q11.23 copy number variation syndrome; Clock-controlled autophagy in b…	Signaling by ALK fusions and activated point mutants; Neddylation; Interleukin-1 signaling; KEAP1-NFE2L2 pathway; p75NTR recruits signalling complexes; NF-kB is activated and signals survival; PINK1-PRKN Mediated Mitophagy; NRIF signals cell death from the nucleus; Pexophagy; Nuclear events mediated by NFE2L2	2261.82	2521.18	2180.31	2701.07	2130.32	2178.27	4714.68	3762.96	2880.27	6361.58	1954.1	4133.63	5764.37	3815.76	6543.55	4066.77	2324.67	3351.25	High	Peak Found	Not Found	Peak Found	Not Found	Not Found	High	Not Found	Not Found	Peak Found	Peak Found
High	P01024	Complement C3 OS=Homo sapiens OX=9606 GN=C3 PE=1 SV=2	1	1	6	1	1663	187	6.4	9.52	cell-cell signaling;cell organization and biogenesis;protein metabolism;other metabolic processes;stress response;developmental processes;signal transduction;other biological processes	non-structural extracellular;plasma membrane;other membranes;ER/Golgi;other cytoplasmic organelle;other cell component	signal transduction activity or receptor binding;enzyme regulator activity	Pf00207, Pf01759, Pf01821, Pf01835, Pf07677, Pf07678, Pf07703, Pf17789, Pf17790, Pf17791	718	C3	A7E236; hsa:718; P01024	ENSG00000125730	Allograft rejection; Complement system; TYROBP causal network in microglia; Cells and molecules involved in local acute inflammatory response ; 16p11.2 distal deletion syndrome; Complement system in neuronal development and plasticity; Acquired partial lipodystrophy / Barraquer-Simons syndrome; Complement activation; Complement and coagulation cascades	Immunoregulatory interactions between a Lymphoid and a non-Lymphoid cell; Regulation of Complement cascade; Neutrophil degranulation; Regulation of Insulin-like Growth Factor (IGF) transport and uptake by Insulin-like Growth Factor Binding Proteins (IGFBPs); Post-translational protein phosphorylation; G alpha (i) signalling events; Peptide ligand-binding receptors; Purinergic signaling in leishma…	3014.07	2895.3	4818.47	2036.84	4077.11	3333.24	1455.54	4240.99	3436.39	5318.63	6479.12	6370.56	5781.32	8799.67	13716	5021.5	10811.6	8909.56	Not Found	Not Found	Peak Found	Not Found	Not Found	Not Found	Not Found	Peak Found	Peak Found	Peak Found	Peak Found
High	O15144	Actin-related protein 2/3 complex subunit 2 OS=Homo sapiens OX=9606 GN=ARPC2 PE=1 SV=1	3	1	9	1	300	34.3	7.36	19.93	cell organization and biogenesis;other biological processes	plasma membrane;other membranes;cytosol;cytoskeleton;nucleus;other cytoplasmic organelle;other cell component	cytoskeletal activity	Pf04045	10109	ARPC2	hsa:10109; O15144; Q92801; Q9P1D4	ENSG00000163466	Pathogenic Escherichia coli infection	Regulation of actin dynamics for phagocytic cup formation; FCGR3A-mediated phagocytosis; RHO GTPases Activate WASPs and WAVEs; Clathrin-mediated endocytosis; EPHB-mediated forward signaling	2127.86	2339.11	4871.83	1996.85	3452.52	4007.34	3323.94	5400.38	3911.06	5746.54	6500.2	6156.13	8788.83	8475.23	12215.5	16263.6	12364	10829.9	Not Found	Not Found	Peak Found	Not Found	Not Found	Not Found	Peak Found	Peak Found	Peak Found	High	High
High	Q07666	KH domain-containing, RNA-binding, signal transduction-associated protein 1 OS=Homo sapiens OX=9606 GN=KHDRBS1 PE=1 SV=1	4	2	9	2	443	48.2	8.66	16.21	cell cycle OR cell proliferation;RNA metabolism OR transcription;other metabolic processes;signal transduction;other biological processes	plasma membrane;other membranes;cytosol;nucleus;other cell component	nucleic acid binding activity;other molecular function	Pf00013, Pf16274, Pf16568	10657	KHDRBS1	D3DPP3; hsa:10657; Q07666; Q6PJX7; Q8NB97; Q99760	ENSG00000121774	Leptin signaling pathway	PTK6 Regulates Proteins Involved in RNA Processing	3723.57	6478.19	3663.09	6067.48	5095.37	6086.28	4122.08	5459.91	4606.21	4986.87	12734.2	22320.8	15212.4	29589.9	12564.5	11518.3	18201.2	19608.6	Not Found	Not Found	Not Found	Not Found	Not Found	Not Found	Not Found	Not Found	Not Found	High	Peak Found
High	O15197	Ephrin type-B receptor 6 OS=Homo sapiens OX=9606 GN=EPHB6 PE=1 SV=4	1	1	5	1	1021	110.6	6.65	1.67	cell organization and biogenesis;protein metabolism;other metabolic processes;developmental processes;signal transduction;other biological processes	non-structural extracellular;plasma membrane;other membranes;cytosol;other cell component	kinase activity;other molecular function	Pf00041, Pf01404, Pf07647, Pf07699, Pf07714, Pf14575	2051	EPHB6	A4D2I7; A8CDT5; D3DXD3; hsa:2051; O15197; Q2TB23; Q2TB24		Neural crest cell migration during development; Neural crest cell migration in cancer	EPHB-mediated forward signaling; Ephrin signaling; EPH-ephrin mediated repulsion of cells	11341.1	6429.11	7248.38	1510.68	5705.3	3614.83	6060.93	7081.5	5621.01	8288.91	6380.58	10527.5	7121.79	9019.8	11095.1	4418.91	5831.38	6732.8	Peak Found	Peak Found	Peak Found	High	Peak Found	Peak Found	Peak Found	Peak Found	Peak Found	Peak Found	Peak Found
High	Q8TCZ2	CD99 antigen-like protein 2 OS=Homo sapiens OX=9606 GN=CD99L2 PE=1 SV=1	10	2	8	2	262	28	5.14	8.94	cell adhesion;other biological processes	plasma membrane;other membranes;other cell component		Pf12301	83692	CD99L2	A8K2D5; A8K5R0; B3KWG2; B4DDL7; E7EMK5; E9PD27; hsa:83692; Q8TAW2; Q8TCZ0; Q8TCZ1; Q8TCZ2; Q9BQG9	ENSG00000102181		Cell surface interactions at the vascular wall	5845.56	5910.23	6199.13	3434.37	4905.93	4538.09	5114.15	4692.83	5165.69	20034.1	10427.9	11822	11920.7	11278	8439.35	14638.7	9755.42	9258.2	Not Found	Not Found	Not Found	Not Found	Not Found	Not Found	Not Found	Not Found	Not Found	High	High
High	P07355	Annexin A2 OS=Homo sapiens OX=9606 GN=ANXA2 PE=1 SV=2	25	9	37	9	339	38.6	7.75	45.25	cell organization and biogenesis;transport;developmental processes;other biological processes	non-structural extracellular;extracellular matrix;plasma membrane;other membranes;nucleus;other cytoplasmic organelle;other cell component	transporter activity;enzyme regulator activity;cytoskeletal activity;other molecular function	Pf00191	302	ANXA2	hsa:302; P07355; Q567R4; Q6N0B3; Q8TBV2; Q96DD5; Q9UDH8	ENSG00000182718	Gastrin signaling pathway; CCL18 signaling pathway; Prostaglandin synthesis and regulation	Neutrophil degranulation; Smooth Muscle Contraction; Dissolution of Fibrin Clot; Gene and protein expression by JAK-STAT signaling after Interleukin-12 stimulation	25487.3	40657.3	37001.6	44656.5	35161.4	29726.1	40393.6	42715.6	52683.3	81544.5	73674.7	101963	86705.4	130704	82923	55078.8	115838	111177	High	High	Peak Found	High	Peak Found	Peak Found	High	Peak Found	Peak Found	High	High
High	P98172	Ephrin-B1 OS=Homo sapiens OX=9606 GN=EFNB1 PE=1 SV=1	3	1	8	1	346	38	8.94	14.8	cell adhesion;cell-cell signaling;cell organization and biogenesis;developmental processes;signal transduction;other biological processes	plasma membrane;other membranes;nucleus;other cell component	signal transduction activity or receptor binding	Pf00812	1947	EFNB1	D3DVU0; hsa:1947; P98172	ENSG00000090776	Cell migration and invasion through p75NTR	EPHB-mediated forward signaling; EPH-ephrin mediated repulsion of cells; Ephrin signaling	2935.09	3930.41	5185.86	3566.52	1979.92	3841.74	4739.93	1944.5	3507.17	9680.15	7456.31	5874.5	8791.58	5867.72	10182.9	7662.88	5409.86	8758.88	Not Found	Not Found	Peak Found	Peak Found	Not Found	Not Found	High	Not Found	Peak Found	High	Peak Found
High	P13987	CD59 glycoprotein OS=Homo sapiens OX=9606 GN=CD59 PE=1 SV=1	28	4	25	4	128	14.2	6.48	30.63	stress response;signal transduction;other biological processes	plasma membrane;other membranes;ER/Golgi;other cell component	other molecular function	Pf00021	966	CD59	E9PR17; hsa:966; P13987	ENSG00000085063	Complement system; Complement system in neuronal development and plasticity	Regulation of Complement cascade; COPI-mediated anterograde transport; Neutrophil degranulation; COPII-mediated vesicle transport; Cargo concentration in the ER	42223.5	20770.2	31982.5	12518.8	13236.3	23017.9	33126	29157.5	23907.8	32058.8	21815.3	21701.6	32157	23473.1	32267.2	31583.2	24351.2	34441.7	High	High	Peak Found	High	Peak Found	Peak Found	High	Peak Found	High	High	High
High	P08582	Melanotransferrin OS=Homo sapiens OX=9606 GN=MELTF PE=1 SV=2	4	2	12	2	738	80.2	5.94	16.8	transport;other biological processes	non-structural extracellular;plasma membrane;other membranes;ER/Golgi;other cytoplasmic organelle;other cell component	other molecular function	Pf00405	4241	MELTF	hsa:4241; P08582; Q9BQE2	ENSG00000163975	3q29 copy number variation syndrome	Regulation of Insulin-like Growth Factor (IGF) transport and uptake by Insulin-like Growth Factor Binding Proteins (IGFBPs); Post-translational protein phosphorylation; Post-translational modification: synthesis of GPI-anchored proteins	40767.2	5858.76	11199.9	9083.83	7901.84	6758.92	13241.5	10576.6	14688.8	13403.8	16214.5	15404.5	18978.8	20153.1	17368.2	16337.9	16759.5	13283.4	Peak Found	Not Found	High	Peak Found	Peak Found	High	High	High	Peak Found	High	High
High	P14618	Pyruvate kinase PKM OS=Homo sapiens OX=9606 GN=PKM PE=1 SV=4	20	11	64	11	531	57.9	7.84	79.87	other metabolic processes;other biological processes	non-structural extracellular;cytosol;ER/Golgi;nucleus;other cell component	nucleic acid binding activity;kinase activity;other molecular function	Pf00224, Pf02887	5315	PKM	A6NFK3; B2R5N8; B3KRY0; B4DFX8; B4DUU6; hsa:5315; P14618; P14786; Q53GK4; Q96E76; Q9BWB5; Q9UCV6; Q9UPF2	ENSG00000067225	Photodynamic therapy-induced HIF-1 survival signaling; Amino acid metabolism; Clear cell renal cell carcinoma pathways; Metabolic reprogramming in colon cancer; Aerobic glycolysis; Glycolysis in senescence; Glucose metabolism in triple-negative breast cancer cells; Glycolysis and gluconeogenesis	Neutrophil degranulation	18857.3	29342	24614.5	18417.3	24756.5	15657.4	31680.3	23030	24161.1	29717.2	29769.7	38681.9	37683	46680.1	43966	29034.2	47564.1	41709.1	High	High	High	High	High	Peak Found	High	High	High	High	High
High	P09651	Heterogeneous nuclear ribonucleoprotein A1 OS=Homo sapiens OX=9606 GN=HNRNPA1 PE=1 SV=5	12	3	9	3	372	38.7	9.13	16.67	RNA metabolism OR transcription;other metabolic processes;stress response;transport;other biological processes	nucleus;other cell component	nucleic acid binding activity;other molecular function	Pf00076, Pf11627	3178	HNRNPA1	A8K4Z8; hsa:3178; P09651; Q3MIB7; Q6PJZ7	ENSG00000135486	mRNA processing	mRNA Splicing - Major Pathway; FGFR2 alternative splicing; Processing of Capped Intron-Containing Pre-mRNA	5689.98	12535.8	9368.28	4722.4	10769.4	9380.19	4180.14	10123.2	10869.6	15923.4	20305.4	29034.1	15525.2	27404.9	22384	8952.21	27556.8	25566.1	Not Found	Peak Found	Peak Found	Not Found	Peak Found	Peak Found	Not Found	Peak Found	Peak Found	Peak Found	High
High	P08727	Keratin, type I cytoskeletal 19 OS=Homo sapiens OX=9606 GN=KRT19 PE=1 SV=4	24	9	159	8	400	44.1	5.14	241.1	cell organization and biogenesis;developmental processes;signal transduction;other biological processes	plasma membrane;other membranes;cytosol;cytoskeleton;other cell component	cytoskeletal activity;other molecular function	Pf00038	3880	KRT19	B2R874; hsa:3880; P08727; Q5XG83; Q6NW33; Q7L5M9; Q96A53; Q96FV1; Q9BYF9; Q9P1Y4	ENSG00000171345	Galanin receptor pathway	Formation of the cornified envelope	89255	112306	88931.7	63647.9	94562.1	73654.2	84313.7	69641.1	80496	201205	136024	178187	160260	201662	175527	123370	199091	161520	High	High	High	High	High	High	High	High	High	High	High
High	P41214	Eukaryotic translation initiation factor 2D OS=Homo sapiens OX=9606 GN=EIF2D PE=1 SV=3	1	1	5	1	584	64.7	7.65	0	cell organization and biogenesis;protein metabolism;other metabolic processes;transport;other biological processes	cytosol;nucleus;other cell component	nucleic acid binding activity;other molecular function	Pf01253, Pf17832	1939	EIF2D	hsa:1939; P41214; Q5SY40; Q8IXV3; Q96DG3; Q96TG7; Q9NR27; Q9NSN0; Q9NV18; Q9NZ21	ENSG00000143486			2911.19	3127.95	3641.29	2818.12	1655.03	2545.13	3980.75	2969.69	3937.96	7350.58	4454.77	5869.63	11235	6044.07	4453.2	5268.33	6194.76	6527.46	Not Found	Not Found	Not Found	Not Found	Not Found	Not Found	Not Found	Not Found	Not Found	Peak Found	Peak Found
High	P55263	Adenosine kinase OS=Homo sapiens OX=9606 GN=ADK PE=1 SV=2	4	1	3	1	362	40.5	6.7	2.04	other metabolic processes	plasma membrane;other membranes;cytosol;nucleus	kinase activity;other molecular function	Pf00294	132	ADK	B7Z783; B7Z800; hsa:132; O00741; O00742; P55263; Q16710; Q5JQ10; Q5JQ11; Q9BTN2	ENSG00000156110	Methionine metabolism leading to sulfur amino acids and related disorders	Purine salvage	3832.21	2922.49	3068.62	3316.79	1427.17	3579.25	3619.39	3656.89	2315.46	4190.35	8951.59	7227.03	6213.7	8086.35	7847.68	4046.92	9387.95	9271.57	Not Found	Not Found	Not Found	Not Found	Not Found	Not Found	Not Found	Not Found	Not Found	Not Found	High
High	P08729	Keratin, type II cytoskeletal 7 OS=Homo sapiens OX=9606 GN=KRT7 PE=1 SV=5	30	15	250	10	469	51.4	5.48	420.22		cytosol;cytoskeleton;other cell component		Pf00038, Pf16208	3855	KRT7	hsa:3855; P08729; Q92676; Q9BUD8; Q9Y3R7	ENSG00000135480		Formation of the cornified envelope	75532.5	89958.5	108700	85364.9	102827	72089.2	119995	99883.3	117321	295752	137719	168423	231328	200957	190025	243560	200784	215630	High	High	High	High	High	High	High	High	High	High	High
High	O00241	Signal-regulatory protein beta-1 OS=Homo sapiens OX=9606 GN=SIRPB1 PE=1 SV=5	3	1	6	1	398	43.2	6.52	15.37	signal transduction;other biological processes	plasma membrane;other membranes;other cell component		Pf07654, Pf07686	10326	SIRPB1	A6NLM2; B2R8V0; O00241; Q5TFQ9; Q5TFR0; Q8TB12; Q9H1U5; Q9Y4V0	ENSG00000101307		DAP12 interactions; Neutrophil degranulation; Signal regulatory protein family interactions	1891.1	1951.73	2387.28	2405.25	1506.38	3046.7	3300.61	2122.47	6105.86	1632.77	8541.74	7111.53	5607.09	4742.38	10381.5	3981.56	8103.28	12765.2	Not Found	Not Found	Not Found	Not Found	Not Found	Not Found	Not Found	Not Found	High	Not Found	High
High	Q9NQ79	Cartilage acidic protein 1 OS=Homo sapiens OX=9606 GN=CRTAC1 PE=1 SV=2	2	1	9	1	661	71.4	5.12	14.69	cell organization and biogenesis;developmental processes		other molecular function	Pf07593, Pf07645, Pf13517	55118	CRTAC1	B1ALN4; hsa:55118; Q5T4F8; Q8N4H6; Q8TE52; Q9NQ78; Q9NQ79; Q9NQ80; Q9NW46	ENSG00000095713			6071.79	5867.88	5433.37	7915.16	4424.67	5048.71	6234.73	7488.32	3402.97	8487.34	7740.23	13977.1	11695.9	10751	13308.8	8183.15	11217.8	13709.7	Not Found	Not Found	Not Found	Not Found	Not Found	Not Found	Not Found	Not Found	Not Found	High	High
High	P23352	Anosmin-1 OS=Homo sapiens OX=9606 GN=ANOS1 PE=1 SV=3	3	1	10	1	680	76.1	9.16	9.7	cell adhesion;cell organization and biogenesis;developmental processes;other biological processes	non-structural extracellular;extracellular matrix;plasma membrane;other membranes;other cell component	enzyme regulator activity;extracellular structural activity;other molecular function	Pf00041, Pf00095, Pf17869	3730	ANOS1	B2RPF8; hsa:3730; P23352	ENSG00000011201	Development of ureteric collection system; Kallmann syndrome	Negative regulation of FGFR1 signaling; FGFR1c ligand binding and activation	7402.57	17111.7	15008.2	15562.6	18119.7	18043.9	2950.29	19896	11646.5	46022	48891.7	49034	22314.1	43077.8	41630.2	22908.8	27085.6	38828.4	Peak Found	Peak Found	Peak Found	Peak Found	Peak Found	Peak Found	Not Found	Peak Found	Peak Found	High	High
High	P49773	Adenosine 5'-monophosphoramidase HINT1 OS=Homo sapiens OX=9606 GN=HINT1 PE=1 SV=2	10	1	16	1	126	13.8	6.95	14.94	protein metabolism;other metabolic processes;signal transduction;other biological processes	plasma membrane;other membranes;cytosol;cytoskeleton;nucleus;other cell component	other molecular function	Pf01230	3094	HINT1	hsa:3094; P49773; Q9H5W8	ENSG00000169567			15850.1	5749.45	11119.4	26592.7	2607.34	4046.17	12750.4	9773.9	10662.5	32287.6	8657.12	4769.01	13716.4	6413.96	9238.28	9284.19	6858.09	10937.1	High	Peak Found	High	High	Not Found	Not Found	High	High	High	Peak Found	High
High	Q9ULF5	Zinc transporter ZIP10 OS=Homo sapiens OX=9606 GN=SLC39A10 PE=1 SV=2	3	2	9	2	831	94.1	6.76	17.02	transport;other biological processes	plasma membrane;other membranes	transporter activity	Pf02535	57181	SLC39A10	A8K5C6; B4DGU0; hsa:57181; Q3MJA4; Q68CR5; Q6DKH6; Q9ULF5; Q9Y3Z1	ENSG00000196950	Nuclear receptors meta-pathway; NRF2 pathway; Zinc homeostasis	Zinc influx into cells by the SLC39 gene family	6765.7	5157.92	5259.17	8241.13	6909.24	10465.7	12602.3	15372.6	7548.95	18315	23386.6	17224.3	18461.9	24223.7	16843.6	17730.5	13140.6	22748.4	Not Found	Not Found	Not Found	Peak Found	Peak Found	Peak Found	High	Peak Found	Peak Found	High	High
High	P50454	Serpin H1 OS=Homo sapiens OX=9606 GN=SERPINH1 PE=1 SV=2	12	4	13	4	418	46.4	8.69	12.13	cell organization and biogenesis;protein metabolism;other metabolic processes;stress response;developmental processes;other biological processes	non-structural extracellular;other membranes;ER/Golgi	enzyme regulator activity;other molecular function	Pf00079	871	SERPINH1	B3KVJ3; hsa:871; P29043; P50454; Q5XPB4; Q6NSJ6; Q8IY96; Q9NP88	ENSG00000149257	Endochondral ossification; Type I collagen synthesis in the context of osteogenesis imperfecta; Endochondral ossification with skeletal dysplasias; 15q13.3 copy number variation syndrome	Collagen biosynthesis and modifying enzymes	6065.38	4553.29	4995.94	4184.54	4863.27	5627.64	5299.17	6932.22	7228.03	4486.52	8612	11867.4	18239.2	10827.4	9135.55	4922.5	12755	18281	Peak Found	Not Found	Not Found	Peak Found	Not Found	Not Found	High	Peak Found	Not Found	High	High
High	Q71DI3	Histone H3.2 OS=Homo sapiens OX=9606 GN=H3C15 PE=1 SV=3	43	4	29	4	136	15.4	11.27	30.25	cell organization and biogenesis	non-structural extracellular;nucleus;other cell component	nucleic acid binding activity;other molecular function	Pf00125	126961; 333932; 653604	H3C13; H3C14; H3C15	A2BDF6; A6NFS4; hsa:126961; hsa:333932; hsa:653604; Q6B053; Q71DI3	ENSG00000183598; ENSG00000203811; ENSG00000203852	Histone modifications; FBXL10 enhancement of MAP/ERK signaling in diffuse large B-cell lymphoma	Amyloid fiber formation; HCMV Early Events; HCMV Late Events; RUNX1 regulates transcription of genes involved in differentiation of HSCs; Transcriptional regulation by small RNAs; B-WICH complex positively regulates rRNA expression; Formation of the beta-catenin:TCF transactivating complex; Oxidative Stress Induced Senescence; HDACs deacetylate histones; NoRC negatively regulates rRNA expression;…	26420.1	34317.2	29776.4	21828.6	24804.3	19983.5	21498.3	28371.5	25829.2	45501.8	37146.5	59918.2	38539.6	53082.4	48378.5	49536.1	63516.4	51807.1	High	High	High	Peak Found	High	Peak Found	High	High	High	High	High
High	P78536	Disintegrin and metalloproteinase domain-containing protein 17 OS=Homo sapiens OX=9606 GN=ADAM17 PE=1 SV=1	1	1	2	1	824	93	5.76	1.75	cell adhesion;protein metabolism;other metabolic processes;stress response;developmental processes;signal transduction;other biological processes	plasma membrane;other membranes;cytosol;cytoskeleton;ER/Golgi;other cell component	signal transduction activity or receptor binding;other molecular function	Pf00200, Pf01562, Pf13688, Pf16698	6868	ADAM17	hsa:6868; O60226; P78536	ENSG00000151694	Alzheimer's disease and miRNA effects; Brain-derived neurotrophic factor (BDNF) signaling pathway; Notch signaling; Copper homeostasis; Ebola virus infection in host; Soluble ACE2-mediated cell entry of SARS-CoV-2; Interactions of natural killer cells in pancreatic cancer; Alzheimer's disease; Notch signaling pathway	Collagen degradation; Activated NOTCH1 Transmits Signal to the Nucleus; Constitutive Signaling by NOTCH1 PEST Domain Mutants; Constitutive Signaling by NOTCH1 HD Domain Mutants; Constitutive Signaling by NOTCH1 HD+PEST Domain Mutants; CD163 mediating an anti-inflammatory response; Release of Hh-Np from the secreting cell; Constitutive Signaling by NOTCH1 t(7;9)(NOTCH1:M1580_K2555) Translocation M…	15947.4	23715.2	18908.5	1570.17	18135	11380.7	12581.3	15841.1	15756.1	26940	29657.7	22718.7	24993.1	25167.8	26735.8	14946.2	27323.5	25388.9	Peak Found	Peak Found	Peak Found	Not Found	Peak Found	Peak Found	Peak Found	Peak Found	Peak Found	Peak Found	Peak Found
High	P05121	Plasminogen activator inhibitor 1 OS=Homo sapiens OX=9606 GN=SERPINE1 PE=1 SV=1	22	7	153	7	402	45	7.2	302.29	other metabolic processes;stress response;developmental processes;other biological processes	non-structural extracellular;extracellular matrix;plasma membrane;other membranes;other cell component	signal transduction activity or receptor binding;enzyme regulator activity;other molecular function	Pf00079	5054	SERPINE1	B7Z4S0; F8WD53; hsa:5054; P05121	ENSG00000106366	Selenium micronutrient network; Vitamin B12 metabolism; Folate metabolism; Adipogenesis; Oncostatin M signaling pathway; Blood clotting cascade; Photodynamic therapy-induced HIF-1 survival signaling; Hypothesized pathways in pathogenesis of cardiovascular disease; miRNA regulation of p53 pathway in prostate cancer; Gastrin signaling pathway; TGF-beta receptor signaling in skeletal dysplasias; p53…	ECM proteoglycans; SMAD2/SMAD3:SMAD4 heterotrimer regulates transcription; Platelet degranulation ; BMAL1:CLOCK,NPAS2 activates circadian gene expression; Dissolution of Fibrin Clot	169507	115780	164097	190379	120432	112042	187594	126697	136684	263238	159333	210174	335449	237764	266267	240393	218742	228247	High	High	High	High	High	High	High	High	High	High	High
High	P35580	Myosin-10 OS=Homo sapiens OX=9606 GN=MYH10 PE=1 SV=3	1	3	39	2	1976	228.9	5.54	33.7	cell adhesion;cell cycle OR cell proliferation;cell organization and biogenesis;other biological processes	plasma membrane;other membranes;cytosol;cytoskeleton;other cell component	cytoskeletal activity;nucleic acid binding activity;other molecular function	Pf00063, Pf00612, Pf01576, Pf02736	4628	MYH10	B2RWP9; D3DTS1; F8VTL3; hsa:4628; P35580; Q12989; Q149N3; Q149N4; Q16087; Q4LE45; Q6PK16; Q9BWG0	ENSG00000133026	Regulation of actin cytoskeleton	RHO GTPases activate CIT; EPHA-mediated growth cone collapse; Sema4D induced cell migration and growth-cone collapse; RHO GTPases activate PKNs; RHO GTPases Activate ROCKs; RHO GTPases activate PAKs	3509.21	3884.67	5053.7	1881.93	4612.25	2830.92	1687.03	4082.73	6229.16	6009.49	5204.3	4193.92	6487.13	5487.63	6208.61	6005.39	4430.35	7332.38	High	Peak Found	High	High	Peak Found	Peak Found	High	High	High	High	High
High	P02751	Fibronectin OS=Homo sapiens OX=9606 GN=FN1 PE=1 SV=5	1	2	26	2	2477	272.2	5.5	50.14	cell adhesion;cell organization and biogenesis;protein metabolism;other metabolic processes;stress response;developmental processes;signal transduction;other biological processes	non-structural extracellular;extracellular matrix;plasma membrane;other membranes;ER/Golgi;other cell component	signal transduction activity or receptor binding;enzyme regulator activity;other molecular function	Pf00039, Pf00040, Pf00041	2335	FN1	B7ZLF0; E9PE77; E9PG29; hsa:2335; O95609; O95610; P02751; Q14312; Q14325; Q14326; Q17RV7; Q53S27; Q564H7; Q585T2; Q59EH1; Q60FE4; Q68DP8; Q68DP9; Q68DT4; Q6LDP6; Q6MZS0; Q6MZU5; Q6N025; Q6N0A6; Q7Z391; Q86T27; Q8IVI8; Q96KP7; Q96KP8; Q96KP9; Q9H1B8; Q9HAP3; Q9UMK2	ENSG00000115414	Mammary gland development pathway - Puberty (Stage 2 of 4); miRNA targets in ECM and membrane receptors; Focal adhesion; Overview of nanoparticle effects; RAC1/PAK1/p38/MMP2 pathway; TGF-beta signaling pathway; Interactions between LOXL4 and oxidative stress pathway; Physico-chemical features and toxicity-associated pathways; TGF-beta signaling in thyroid cells for epithelial-mesenchymal transiti…	Cell surface interactions at the vascular wall; Platelet degranulation ; Regulation of Insulin-like Growth Factor (IGF) transport and uptake by Insulin-like Growth Factor Binding Proteins (IGFBPs); Post-translational protein phosphorylation; ALK mutants bind TKIs; Signaling by ALK fusions and activated point mutants; Degradation of the extracellular matrix; Integrin cell surface interactions; ECM…	28406.3	30089.2	30816.3	21631.5	38772.6	25112.7	25152.5	26236.8	39867.9	35196.9	47658.4	91020.8	54584.9	48741.4	57496	31257.4	52162.6	43341.3	Peak Found	High	High	High	High	High	High	High	High	High	High
High	P02675	Fibrinogen beta chain OS=Homo sapiens OX=9606 GN=FGB PE=1 SV=2	4	2	26	2	491	55.9	8.27	29.99	cell adhesion;cell organization and biogenesis;protein metabolism;other metabolic processes;stress response;other biological processes	non-structural extracellular;plasma membrane;other membranes;ER/Golgi;other cell component	signal transduction activity or receptor binding;other molecular function	Pf00147, Pf08702	2244	FGB	A0JLR9; B2R7G3; hsa:2244; P02675; Q32Q65; Q3KPF2	ENSG00000171564	Selenium micronutrient network; Folate metabolism; Blood clotting cascade; Complement system; VEGFA-VEGFR2 signaling pathway; Fibrin complement receptor 3 signaling pathway; COVID-19, thrombosis and anticoagulation; Network map of SARS-CoV-2 signaling pathway; Complement and coagulation cascades	Integrin cell surface interactions; Regulation of TLR by endogenous ligand; ER-Phagosome pathway; Signaling by BRAF and RAF1 fusions; Platelet degranulation ; MyD88:MAL(TIRAP) cascade initiated on plasma membrane; MyD88 deficiency (TLR2/4); IRAK4 deficiency (TLR2/4); Signaling by moderate kinase activity BRAF mutants; Paradoxical activation of RAF signaling by kinase inactive BRAF; Signaling down…	29454.9	36214.8	37048.2	25850.2	35963.6	21708.2	33574.8	64133	50084.9	49515.2	38677.2	61241	55560.3	53945.6	56127.5	40325.4	66189.1	53181.7	Peak Found	High	High	High	Peak Found	Peak Found	High	High	High	High	Peak Found
High	Q8N0Y7	Probable phosphoglycerate mutase 4 OS=Homo sapiens OX=9606 GN=PGAM4 PE=3 SV=1	10	3	14	3	254	28.8	6.65	28.25	other metabolic processes;other biological processes	cytoskeleton	other molecular function	Pf00300	441531	PGAM4	hsa:441531; Q5JPN2; Q8N0Y7; Q8NI24; Q8NI25; Q8NI26	ENSG00000226784			3460.38	6327.61	6977.99	6454.62	5034.74	3093.89	7917.23	5571.57	7782.93	8843.02	8871.67	8221.59	11263.6	9100.93	10763.7	5668.65	6538.84	10615.4	High	Peak Found	Peak Found	High	Peak Found	High	High	Peak Found	Peak Found	High	Peak Found
High	Q86W34	Archaemetzincin-2 OS=Homo sapiens OX=9606 GN=AMZ2 PE=2 SV=2	4	1	6	1	360	41.2	8.15	10.89			other molecular function	Pf07998	51321	AMZ2	A6NLD9; B3KR44; hsa:51321; Q5XKF1; Q86W34; Q9NZE2	ENSG00000196704			3886.35	2089.81	3329.54	2999.28	2638.09	1677.98	2894.84	3713.89	1427.2	4015.32	5566.37	7651.36	4099.93	8790.54	5625.17	2058.86	7583.5	8430.82	Not Found	Not Found	Not Found	Not Found	Not Found	Not Found	Not Found	Not Found	Not Found	Peak Found	High
High	Q6UXI9	Nephronectin OS=Homo sapiens OX=9606 GN=NPNT PE=2 SV=3	2	1	3	1	565	61.9	8.34	6.08	cell adhesion;cell organization and biogenesis;developmental processes;other biological processes	non-structural extracellular;extracellular matrix;other membranes;cytoskeleton	signal transduction activity or receptor binding;other molecular function	Pf00629, Pf07645, Pf12947	255743	NPNT	A6NFT9; A8K1W4; B4DIT4; B4DYK3; B4E2H7; B4E3H2; D6RCA1; E9PCK8; E9PCQ1; E9PE64; E9PF04; hsa:255743; Q6UXI9	ENSG00000168743			6619.41	4004.56	2764.26	1996.53	3656.58	2410.05	3646.43	1997.83	3033.67	4479.36	2860.19	1636.16	5550.54	3709.45	5119.3	4125.62	7477.53	5482.69	Peak Found	Not Found	Not Found	Not Found	Not Found	Not Found	Peak Found	Not Found	Not Found	Peak Found	High
High	Q14512	Fibroblast growth factor-binding protein 1 OS=Homo sapiens OX=9606 GN=FGFBP1 PE=1 SV=1	6	1	9	1	234	26.2	9.1	10.1	cell-cell signaling;signal transduction;other biological processes	non-structural extracellular;plasma membrane;other membranes;other cell component	other molecular function	Pf06473	9982	FGFBP1	A8K5J2; hsa:9982; Q14512	ENSG00000137440	Glucocorticoid receptor pathway; Nuclear receptors meta-pathway	FGFR2b ligand binding and activation	3930.62	3733.57	8483.13	3958.24	2854.94	4018.03	2276.11	4039.28	3762.6	3600.88	5083.72	5205.96	5793.59	8430.94	8260.68	3584.81	8219.49	9431.68	Not Found	Not Found	High	Peak Found	Not Found	Not Found	Not Found	Peak Found	Peak Found	High	High
High	P35613	Basigin OS=Homo sapiens OX=9606 GN=BSG PE=1 SV=2	12	4	58	4	385	42.2	5.66	126.64	cell adhesion;cell organization and biogenesis;developmental processes;signal transduction;other biological processes	plasma membrane;other membranes;ER/Golgi;other cytoplasmic organelle;other cell component	other molecular function	Pf13927	682	BSG	A6NJW1; D3YLG5; hsa:682; P35613; Q7Z796; Q8IZL7	ENSG00000172270	Matrix metalloproteinases; VEGFA-VEGFR2 signaling pathway; IL-18 signaling pathway	Pyruvate metabolism; Degradation of the extracellular matrix; Integrin cell surface interactions; Basigin interactions; Aspirin ADME; Proton-coupled monocarboxylate transport; Defective SLC16A1 causes symptomatic deficiency in lactate transport (SDLT)	65152.9	39042.2	95194.5	107788	66477.8	66934.9	58890.4	104111	84268.7	87296.2	112346	116029	136587	139658	146609	67799.8	123945	141025	High	High	High	High	High	High	High	High	High	High	High
High	P05556	Integrin beta-1 OS=Homo sapiens OX=9606 GN=ITGB1 PE=1 SV=2	9	7	64	7	798	88.4	5.39	99.09	cell adhesion;cell cycle OR cell proliferation;cell organization and biogenesis;stress response;transport;developmental processes;signal transduction;other biological processes	plasma membrane;other membranes;other cytoplasmic organelle;other cell component	signal transduction activity or receptor binding;cytoskeletal activity;other molecular function	Pf00362, Pf07965, Pf07974, Pf08725, Pf17205, Pf18372	3688	ITGB1	A8K6N2; D3DRX9; D3DRY3; D3DRY4; D3DRY5; hsa:3688; P05556; P78466; P78467; Q13089; Q13090; Q13091; Q13212; Q14622; Q14647; Q29RW2; Q7Z3V1; Q8WUM6	ENSG00000150093	Integrin-mediated cell adhesion; Prolactin signaling pathway; Neural crest differentiation; Arrhythmogenic right ventricular cardiomyopathy; Pathogenic Escherichia coli infection; Primary focal segmental glomerulosclerosis (FSGS); Mammary gland development pathway - Embryonic development (Stage 1 of 4); Focal adhesion; Hepatocyte growth factor receptor signaling; RAC1/PAK1/p38/MMP2 pathway; TGF-b…	Immunoregulatory interactions between a Lymphoid and a non-Lymphoid cell; RHOG GTPase cycle; RAC2 GTPase cycle; RAC3 GTPase cycle; Integrin cell surface interactions; ECM proteoglycans; GPER1 signaling; Interleukin-4 and Interleukin-13 signaling; Syndecan interactions; MET activates PTK2 signaling; Molecules associated with elastic fibres; Fibronectin matrix formation; RAC1 GTPase cycle; Basigin …	78793.3	81168.1	63200.6	141893	53611.3	57875	80878.8	72444.2	67180.3	142740	80342.8	84907	119772	107963	120091	107180	107104	116386	High	High	High	High	High	High	High	High	High	High	High
High	Q8WUJ3	Cell migration-inducing and hyaluronan-binding protein OS=Homo sapiens OX=9606 GN=CEMIP PE=1 SV=2	6	9	28	9	1361	152.9	7.85	25.57	other metabolic processes;other biological processes	non-structural extracellular;plasma membrane;other membranes;ER/Golgi;nucleus;other cell component	other molecular function	Pf10162, Pf13330, Pf15711	57214	CEMIP	hsa:57214; Q6L9J5; Q8WUJ3; Q9H1K5; Q9NPN9; Q9ULM1	ENSG00000103888		Hyaluronan biosynthesis and export	37101.9	38266.1	36400.1	41306	45835.2	48935.7	31497.5	51679.6	36777.3	62061.5	48143	63318.6	94707.4	90868.8	102101	80699.3	92910.6	94517.3	Peak Found	Peak Found	Peak Found	Peak Found	Peak Found	Peak Found	Peak Found	Peak Found	Peak Found	High	High
High	Q9BT76-3	Isoform 3 of Uroplakin-3b OS=Homo sapiens OX=9606 GN=UPK3B	9	2	25	2	276	29.8	6.93	60.24						UPK3B	Q9BT76-3				57248.3	27755.7	28111.1	40869.7	20478.1	18371.5	52896.9	32228.9	6313.21	64542.4	4265.93	33021.5	72902.9	36808	42220.8	76225.5	27593.6	33259	High	High	High	High	High	High	High	High	Not Found	High	High
High	Q14574	Desmocollin-3 OS=Homo sapiens OX=9606 GN=DSC3 PE=1 SV=3	4	4	33	4	896	99.9	6.1	59.65	cell adhesion;developmental processes;other biological processes	non-structural extracellular;plasma membrane;other membranes;other cell component	other molecular function	Pf00028, Pf01049, Pf08758	1825	DSC3	A6NN35; hsa:1825; Q14200; Q14574; Q9HAZ9	ENSG00000134762	Malignant pleural mesothelioma	Formation of the cornified envelope	10021	18157.5	23270.6	22210	23374.2	20179	18904.9	22011	24388.7	55822.2	56222.7	85129.8	45354.3	51754.6	42499.2	34555.5	61374.2	58688.9	Not Found	Peak Found	Peak Found	Peak Found	High	Peak Found	Peak Found	Peak Found	High	High	High
High	P25705	ATP synthase subunit alpha, mitochondrial OS=Homo sapiens OX=9606 GN=ATP5F1A PE=1 SV=1	7	3	8	3	553	59.7	9.13	7.92	other metabolic processes;transport;other biological processes	plasma membrane;other membranes;mitochondrion;nucleus;other cell component	signal transduction activity or receptor binding;transporter activity;other molecular function	Pf00006, Pf00306, Pf02874	498	ATP5F1A	A8K092; B4DY56; hsa:498; K7ENP3; P25705; Q53XX6; Q8IXV2; Q96FB4; Q96HW2; Q96IR6; Q9BTV8	ENSG00000152234	Electron transport chain: OXPHOS system in mitochondria; 7q11.23 copy number variation syndrome; Oxidative phosphorylation	Mitochondrial protein import; Cristae formation; Formation of ATP by chemiosmotic coupling	3411	3800.75	3313.55	3138.09	2899.12	3109.29	2577.52	2530.19	1752.68	5560.42	4407.9	13857.7	8788.83	6322.2	4254.49	4700.77	10460.6	7051.31	High	Not Found	Peak Found	Peak Found	Peak Found	Not Found	High	Peak Found	Peak Found	High	Peak Found
High	Q8N6H7	ADP-ribosylation factor GTPase-activating protein 2 OS=Homo sapiens OX=9606 GN=ARFGAP2 PE=1 SV=1	2	1	4	1	521	56.7	7.99	8.77	cell organization and biogenesis;transport	plasma membrane;other membranes;cytosol;ER/Golgi	enzyme regulator activity;other molecular function	Pf01412	84364	ARFGAP2	B4DX29; B7Z9M7; D3DQQ9; hsa:84364; Q3LIF2; Q8N3I1; Q8N6H7; Q96SX7	ENSG00000149182	IL-18 signaling pathway	CDC42 GTPase cycle; COPI-mediated anterograde transport; COPI-dependent Golgi-to-ER retrograde traffic	2784.02	2836.3	2386.72	2712.46	3315.55	1836.2	3154.56	3566.36	2391.38	3296.53	3664.18	4289.71	5484.39	5850.8	3018.73	4215.02	5908.17	4192.81	Not Found	Not Found	Not Found	Not Found	Not Found	Not Found	Not Found	Not Found	Not Found	Peak Found	High
High	Q2M389	WASH complex subunit 4 OS=Homo sapiens OX=9606 GN=WASHC4 PE=1 SV=2	1	1	17	1	1173	136.3	7.44	12.85	cell organization and biogenesis;transport;other biological processes	other membranes;nucleus;other cytoplasmic organelle;other cell component		Pf14744, Pf14745, Pf14746	23325	WASHC4	hsa:23325; Q2M389; Q2NL83; Q8IW61; Q8N5W7; Q9NVD6; Q9UPW7	ENSG00000136051			464217	388175	464352	282706	428353	354212	264630	454066	456414	545202	515853	637266	538692	709541	741799	510138	904726	891743	High	High	High	Peak Found	Peak Found	High	High	Peak Found	High	High	High
High	P22105-1	Isoform 3 of Tenascin-X OS=Homo sapiens OX=9606 GN=TNXB	7	9	88	9	4242	457.9	5.17	165.33						TNXB	P22105-1				90118.5	110682	160665	113300	69162.8	140440	168721	162862	190913	303215	186934	204584	198696	234842	226294	158277	175284	200848	High	High	High	High	High	High	High	High	High	High	High
High	P12236	ADP/ATP translocase 3 OS=Homo sapiens OX=9606 GN=SLC25A6 PE=1 SV=4	17	6	49	6	298	32.8	9.74	34.13	transport;other biological processes	other membranes;mitochondrion	transporter activity	Pf00153	293	SLC25A6	hsa:293; P12236; Q96C49	ENSG00000169100	Electron transport chain: OXPHOS system in mitochondria; Alzheimer's disease and miRNA effects; Alzheimer's disease	Mitochondrial protein import; Transport of nucleosides and free purine and pyrimidine bases across the plasma membrane; Vpr-mediated induction of apoptosis by mitochondrial outer membrane permeabilization; Influenza Virus Induced Apoptosis	14172.3	6219.03	10206.8	5898.96	6463.22	7432	5433.22	7095.78	10745.5	9371.88	9313.94	5819.85	13050.3	12767.2	9555.54	9559.58	10653.1	8702.28	High	High	Peak Found	High	Peak Found	High	High	High	High	High	High
High	Q9ULI3	Protein HEG homolog 1 OS=Homo sapiens OX=9606 GN=HEG1 PE=1 SV=3	1	1	2	1	1381	147.4	6.18	0	cell organization and biogenesis;developmental processes;other biological processes	non-structural extracellular;plasma membrane;other membranes;other cell component	other molecular function	Pf00008, Pf07645	57493	HEG1	hsa:57493; Q6NX66; Q8NC40; Q9BSV0; Q9ULI3	ENSG00000173706			7140.9	3769.64	10136	7172.32	5930.78	4787.07	7843.77	2691.12	5342.42	2358.85	7368.39	8048.45	12396.3	2067.59	11703.3	6122.4	8428.71	11249.8	Peak Found	Not Found	Peak Found	Peak Found	Peak Found	Peak Found	High	Not Found	Peak Found	Not Found	Peak Found
High	P23229	Integrin alpha-6 OS=Homo sapiens OX=9606 GN=ITGA6 PE=1 SV=5	5	5	35	5	1130	126.5	6.61	55.77	cell adhesion;cell organization and biogenesis;developmental processes;signal transduction;other biological processes	plasma membrane;other membranes;other cell component	signal transduction activity or receptor binding;other molecular function	Pf01839, Pf08441	3655	ITGA6	B2RMU9; B4DG69; B4DKB8; C4AM96; G5E9H1; hsa:3655; P23229; Q08443; Q0MRC7; Q14646; Q16508; Q53RX7; Q59HB7; Q86VL6; Q9UCT1; Q9UN03	ENSG00000091409	Integrin-mediated cell adhesion; Arrhythmogenic right ventricular cardiomyopathy; Alpha 6 beta 4 signaling pathway; Mammary gland development pathway - Embryonic development (Stage 1 of 4); Focal adhesion; Regulation of apoptosis by parathyroid hormone-related protein; Focal adhesion: PI3K-Akt-mTOR-signaling pathway; PI3K-Akt signaling pathway; Ebola virus infection in host; Small cell lung cance…	Integrin cell surface interactions; Syndecan interactions; Basigin interactions; Laminin interactions; Type I hemidesmosome assembly; Assembly of collagen fibrils and other multimeric structures	46458.4	65257.2	58617.2	64593.7	47528.5	45304.3	60781.5	49305.2	56463.3	57864.5	56202	80650	93329.3	96072.3	69689.3	70579.4	99438	76285.8	High	High	High	High	High	High	High	Peak Found	High	High	High
High	O00468	Agrin OS=Homo sapiens OX=9606 GN=AGRN PE=1 SV=6	1	1	2	1	2068	217.2	6.39	0	cell-cell signaling;cell organization and biogenesis;developmental processes;signal transduction;other biological processes	non-structural extracellular;extracellular matrix;plasma membrane;other membranes;ER/Golgi;other cytoplasmic organelle;other cell component	cytoskeletal activity;other molecular function	Pf00008, Pf00050, Pf00053, Pf00054, Pf01390, Pf03146, Pf07648	375790	AGRN	hsa:375790; O00468; Q5SVA1; Q5SVA2; Q60FE1; Q7KYS8; Q8N4J5; Q96IC1; Q9BTD4	ENSG00000188157	Primary focal segmental glomerulosclerosis (FSGS); Splicing factor NOVA regulated synaptic proteins; GDNF signaling	Integrin cell surface interactions; ECM proteoglycans; NCAM1 interactions; A tetrasaccharide linker sequence is required for GAG synthesis; HS-GAG biosynthesis; HS-GAG degradation; Non-integrin membrane-ECM interactions; Defective B4GALT7 causes EDS, progeroid type; Defective B3GAT3 causes JDSSDHD; Defective EXT2 causes exostoses 2; Defective EXT1 causes exostoses 1, TRPS2 and CHDS; Defective B3G…	3174.79	2906.16	3453.48	3266.45	2904.18	2056.47	5909.87	3381.77	2958.69	4718.91	2713.37	2964.83	6205.77	3729.06	5699.05	6496.6	2210.31	4101.26	Not Found	Not Found	Not Found	Not Found	Not Found	Not Found	Peak Found	Not Found	Not Found	Peak Found	Peak Found
High	P58876	Histone H2B type 1-D OS=Homo sapiens OX=9606 GN=H2BC5 PE=1 SV=2	50	7	68	2	126	13.9	10.32	118.01	cell organization and biogenesis	cytosol;nucleus;other cell component	nucleic acid binding activity;other molecular function	Pf00125	3017	H2BC5	hsa:3017; P58876	ENSG00000158373		HCMV Early Events; Defective pyroptosis; Estrogen-dependent gene expression; E3 ubiquitin ligases ubiquitinate target proteins; Amyloid fiber formation; Meiotic synapsis; HCMV Late Events; Ub-specific processing proteases; RUNX1 regulates transcription of genes involved in differentiation of HSCs; Transcriptional regulation by small RNAs; Deposition of new CENPA-containing nucleosomes at the cent…	50940.1	89043.9	103172	49509.1	84044.8	74854	55263.8	110651	108480	108246	148600	167742	122969	144900	181450	98439.5	183629	181379	Peak Found	Peak Found	High	High	Peak Found	Peak Found	Peak Found	High	High	High	High
High	Q15181	Inorganic pyrophosphatase OS=Homo sapiens OX=9606 GN=PPA1 PE=1 SV=2	7	2	14	2	289	32.6	5.86	27.85	other metabolic processes	cytosol;other cell component	other molecular function	Pf00719	5464	PPA1	hsa:5464; Q15181; Q2M348; Q5SQT7; Q6P7P4; Q9UQJ5; Q9Y5B1	ENSG00000180817		Cytosolic tRNA aminoacylation; Pyrophosphate hydrolysis	7831.18	5358.51	2120.38	6851.37	8365.97	3200.68	8709.95	7310.18	7902.72	14612.5	10436.3	11143.1	9967.11	13237.1	13707.2	10014.7	15754.7	13115.1	Peak Found	High	Peak Found	High	High	Not Found	Peak Found	High	High	High	High
High	P06576	ATP synthase subunit beta, mitochondrial OS=Homo sapiens OX=9606 GN=ATP5F1B PE=1 SV=3	4	2	4	2	529	56.5	5.4	3.53	other metabolic processes;transport;developmental processes;other biological processes	plasma membrane;other membranes;mitochondrion;other cell component	signal transduction activity or receptor binding;transporter activity;other molecular function	Pf00006, Pf02874	506	ATP5F1B	A8K4X0; hsa:506; P06576; Q14283	ENSG00000110955	Electron transport chain: OXPHOS system in mitochondria; 7q11.23 copy number variation syndrome; Oxidative phosphorylation	Transcriptional activation of mitochondrial biogenesis; Mitochondrial protein import; Cristae formation; Formation of ATP by chemiosmotic coupling	3701.83	9502.5	5854.87	1599.56	3777.3	4106.67	5479.64	4711.28	3661.71	7186.06	5182.22	6719.72	4283.62	8080.18	7228.22	5537.53	7182.99	7112.75	Not Found	Peak Found	Peak Found	Not Found	Not Found	Not Found	Peak Found	Peak Found	Peak Found	High	High
High	Q00839	Heterogeneous nuclear ribonucleoprotein U OS=Homo sapiens OX=9606 GN=HNRNPU PE=1 SV=6	4	2	36	2	825	90.5	6	17.57	cell cycle OR cell proliferation;cell organization and biogenesis;RNA metabolism OR transcription;other metabolic processes;transport;developmental processes;other biological processes	cytosol;cytoskeleton;nucleus;other cell component	cytoskeletal activity;nucleic acid binding activity;other molecular function	Pf00622, Pf02037, Pf13671	3192	HNRNPU	hsa:3192; O75507; Q00839; Q8N174; Q96HY9; Q9BQ09	ENSG00000153187	mRNA processing; lncRNA in canonical Wnt signaling and colorectal cancer	mRNA Splicing - Major Pathway; Processing of Capped Intron-Containing Pre-mRNA	11125.7	8205.56	9914.75	24999.2	1579.1	7413.08	15020.4	11228.9	13440.1	10748.8	13203.4	6328.09	11818.8	14176	25527.3	13700.5	8127.56	37930.8	High	High	High	High	High	High	High	High	High	High	High
High	Q15417	Calponin-3 OS=Homo sapiens OX=9606 GN=CNN3 PE=1 SV=1	5	1	4	1	329	36.4	6.05	4.22	cell organization and biogenesis;other biological processes	cytosol;cytoskeleton	cytoskeletal activity;other molecular function	Pf00307, Pf00402	1266	CNN3	B4DFK6; B4DP09; F8WA86; hsa:1266; Q15417; Q6FHA7	ENSG00000117519			3297.55	1944.63	1544.61	2003.04	3847.75	1826.38	2933.13	1633.69	2786.51	3991.17	5175.87	3787.53	7840.98	1414.2	3788.4	2701.17	1894.83	3815.16	Not Found	Not Found	Not Found	Not Found	Not Found	Not Found	Not Found	Not Found	Not Found	Not Found	High
High	P50570	Dynamin-2 OS=Homo sapiens OX=9606 GN=DNM2 PE=1 SV=2	3	2	15	2	870	98	7.44	16.66	cell cycle OR cell proliferation;cell organization and biogenesis;transport;developmental processes;signal transduction;other biological processes	plasma membrane;other membranes;cytosol;cytoskeleton;ER/Golgi;nucleus;other cytoplasmic organelle;other cell component	signal transduction activity or receptor binding;cytoskeletal activity;other molecular function	Pf00169, Pf00350, Pf01031, Pf02212	1785	DNM2	A8K1B6; E7EV30; E9PEQ4; hsa:1785; K7ESI9; P50570; Q5I0Y0; Q7Z5S3; Q9UPH4	ENSG00000079805	Synaptic vesicle pathway; Fragile X syndrome; Intracellular trafficking proteins involved in CMT neuropathy	Clathrin-mediated endocytosis; Golgi Associated Vesicle Biogenesis; MHC class II antigen presentation; NGF-stimulated transcription; Lysosome Vesicle Biogenesis; Recycling pathway of L1; Toll Like Receptor 4 (TLR4) Cascade; NOSTRIN mediated eNOS trafficking; Retrograde neurotrophin signalling; Formation of annular gap junctions	30122.5	19036.4	22246.8	23646.1	10515.8	13028.2	24250.6	18322.7	14671.1	29219.5	11115.8	8836.2	24587.6	13407.2	24861.4	38439.3	21619.1	20303.2	High	Peak Found	Peak Found	High	Peak Found	Peak Found	High	Peak Found	High	High	High
High	P61604	10 kDa heat shock protein, mitochondrial OS=Homo sapiens OX=9606 GN=HSPE1 PE=1 SV=2	12	1	10	1	102	10.9	8.92	17.14	stress response;other biological processes	mitochondrion	other molecular function	Pf00166	3336	HSPE1	hsa:3336; O95421; P61604; Q04984; Q53X54; Q9UDH0	ENSG00000115541		RHOG GTPase cycle	2524.26	14598.2	27581.6	14065.8	16310.7	12806.7	9404.34	18009.1	15604.7	21286.2	23206.9	32837.4	17251.4	28363.7	26313.3	15891.2	23493.9	27508.5	Not Found	High	Peak Found	High	Peak Found	Peak Found	Peak Found	High	High	High	High
High	P00488	Coagulation factor XIII A chain OS=Homo sapiens OX=9606 GN=F13A1 PE=1 SV=4	1	1	5	1	732	83.2	6.09	1.72											15250.6	12245.7	9915.47	2394.34	10033.5	11644.2	13498.2	13104.7	24109	12761.2	14853.9	25987.1	16046.9	21121.1	18685	10805.9	14849	17977.2	Peak Found	Peak Found	Peak Found	Not Found	Peak Found	Peak Found	Peak Found	Peak Found	Peak Found	High	High
High	Q13347	Eukaryotic translation initiation factor 3 subunit I OS=Homo sapiens OX=9606 GN=EIF3I PE=1 SV=1	4	1	7	1	325	36.5	5.64	4.27	cell organization and biogenesis;protein metabolism;other metabolic processes	cytosol;translational apparatus;other cell component	nucleic acid binding activity	Pf00400	8668	EIF3I	hsa:8668; Q13347	ENSG00000084623	Translation factors; nsp1 from SARS-CoV-2 inhibits translation initiation in the host cell	L13a-mediated translational silencing of Ceruloplasmin expression; Formation of a pool of free 40S subunits; GTP hydrolysis and joining of the 60S ribosomal subunit; Translation initiation complex formation; Formation of the ternary complex, and subsequently, the 43S complex; Ribosomal scanning and start codon recognition	9416.61	10760.3	2215.01	10931.3	5457.85	3978.23	13645.1	12749	10742.4	13989.2	7865.69	8073.91	18181.9	9087.48	10032.6	9978.18	6051.22	15080.5	Peak Found	High	Not Found	High	Peak Found	Not Found	Peak Found	High	Peak Found	Peak Found	High
High	P60709	Actin, cytoplasmic 1 OS=Homo sapiens OX=9606 GN=ACTB PE=1 SV=1	40	13	230	13	375	41.7	5.48	452.38	cell organization and biogenesis;protein metabolism;other metabolic processes;transport;developmental processes;other biological processes	plasma membrane;other membranes;cytosol;cytoskeleton;nucleus;other cell component	cytoskeletal activity;other molecular function	Pf00022	60	ACTB	hsa:60; P02570; P60709; P70514; P99021; Q11211; Q64316; Q75MN2; Q96B34; Q96HG5	ENSG00000075624	Arrhythmogenic right ventricular cardiomyopathy; Pathogenic Escherichia coli infection; Common pathways underlying drug addiction; Myometrial relaxation and contraction pathways; Focal adhesion; Fas ligand pathway and stress induction of heat shock proteins; Ebola virus infection in host; Acute viral myocarditis; Thermogenesis; Mechanoregulation and pathology of YAP/TAZ via Hippo and non-Hippo me…	Regulation of actin dynamics for phagocytic cup formation; FCGR3A-mediated phagocytosis; Recycling pathway of L1; Translocation of SLC2A4 (GLUT4) to the plasma membrane; RHO GTPases activate IQGAPs; RHO GTPases Activate Formins; RHO GTPases Activate WASPs and WAVEs; Clathrin-mediated endocytosis; EPHB-mediated forward signaling; B-WICH complex positively regulates rRNA expression; HATs acetylate …	413953	325849	395658	567740	294651	295662	328844	319922	360162	569504	351321	400264	541056	543258	653382	410825	521843	461543	High	High	High	High	High	High	High	High	High	High	High
High	P54709	Sodium/potassium-transporting ATPase subunit beta-3 OS=Homo sapiens OX=9606 GN=ATP1B3 PE=1 SV=1	4	1	4	1	279	31.5	8.35	3.51	transport;other biological processes	plasma membrane;other membranes;cytoskeleton;other cell component	other molecular function	Pf00287	483	ATP1B3	B7Z1N7; hsa:483; P54709	ENSG00000069849	Calcium regulation in cardiac cells	Potential therapeutics for SARS; Ion homeostasis; Ion transport by P-type ATPases; Basigin interactions	2454.52	2051.97	3677.38	3721.62	2963.76	2462.44	3059.49	1859.06	3691.68	5238.57	5775.94	5549.96	5276.42	5416.5	5556.38	3848.2	6364.71	5459.02	Not Found	Not Found	Not Found	Not Found	Not Found	Not Found	Not Found	Not Found	Not Found	Peak Found	High
High	P39023	60S ribosomal protein L3 OS=Homo sapiens OX=9606 GN=RPL3 PE=1 SV=2	5	2	8	2	403	46.1	10.18	10.23	cell organization and biogenesis;protein metabolism;other metabolic processes;other biological processes	cytosol;translational apparatus;nucleus;other cell component	nucleic acid binding activity;other molecular function	Pf00297	6122	RPL3	B2RDV9; hsa:6122; P39023; Q15548; Q5I0G0	ENSG00000100316	Cytoplasmic ribosomal proteins	Regulation of expression of SLITs and ROBOs; Nonsense Mediated Decay (NMD) enhanced by the Exon Junction Complex (EJC); L13a-mediated translational silencing of Ceruloplasmin expression; Formation of a pool of free 40S subunits; GTP hydrolysis and joining of the 60S ribosomal subunit; Major pathway of rRNA processing in the nucleolus and cytosol; SRP-dependent cotranslational protein targeting to…	3788.99	1995.84	2503.16	2662.66	3238.42	1528.17	1789.84	4149.88	3092.55	3036.52	3345.83	3714.36	4801.26	7454.48	4831.06	2713.57	1710.34	4460.21	High	Peak Found	Peak Found	High	Not Found	Peak Found	High	Peak Found	Peak Found	High	High
High	P04406	Glyceraldehyde-3-phosphate dehydrogenase OS=Homo sapiens OX=9606 GN=GAPDH PE=1 SV=3	36	12	191	12	335	36	8.46	243.87	cell organization and biogenesis;protein metabolism;other metabolic processes;stress response;other biological processes	plasma membrane;other membranes;cytosol;cytoskeleton;nucleus;other cell component	enzyme regulator activity;cytoskeletal activity;other molecular function	Pf00044, Pf02800	2597	GAPDH	E7EUT4; hsa:2597; P00354; P04406; Q53X65	ENSG00000111640	Cori cycle; Alzheimer's disease and miRNA effects; HIF1A and PPARG regulation of glycolysis; VEGFA-VEGFR2 signaling pathway; Clear cell renal cell carcinoma pathways; Metabolic reprogramming in colon cancer; Aerobic glycolysis; 7q11.23 copy number variation syndrome; Glycolysis in senescence; Alzheimer's disease; Glycolysis and gluconeogenesis; Sudden infant death syndrome (SIDS) susceptibility p…	Glycolysis; Gluconeogenesis	210622	150069	190003	204228	196828	317119	229895	179867	193504	361537	238322	276178	419814	366139	313607	308676	322812	335069	High	High	High	High	High	High	High	High	High	High	High
High	P05787	Keratin, type II cytoskeletal 8 OS=Homo sapiens OX=9606 GN=KRT8 PE=1 SV=7	36	20	415	13	483	53.7	5.59	710.08		cytosol;cytoskeleton;nucleus;other cell component	other molecular function	Pf00038, Pf16208	3856	KRT8	A8K4H3; B0AZN5; F8VXB4; hsa:3856; P05787; Q14099; Q14716; Q14717; Q53GJ0; Q6DHW5; Q6GMY0; Q6P4C7; Q96J60	ENSG00000170421	Primary focal segmental glomerulosclerosis (FSGS); Acute viral myocarditis	Formation of the cornified envelope	628916	547510	590297	751476	559265	572427	614178	502670	541765	1.18876e+06	855986	948477	1.01329e+06	1.02376e+06	1.23388e+06	842386	1.09376e+06	1.09538e+06	High	High	High	High	High	High	High	High	High	High	High
High	Q8IZJ1	Netrin receptor UNC5B OS=Homo sapiens OX=9606 GN=UNC5B PE=1 SV=2	1	1	22	1	945	103.6	6.02	51.43	cell organization and biogenesis;developmental processes;signal transduction;other biological processes	plasma membrane;other membranes	other molecular function	Pf00090, Pf00531, Pf00791, Pf07679, Pf17217	219699	UNC5B	hsa:219699; Q5T3R9; Q5T3S0; Q86SN3; Q8IZJ1; Q8N1Y2; Q9H9F3	ENSG00000107731	Netrin-UNC5B signaling pathway	Caspase activation via Dependence Receptors in the absence of ligand; Netrin mediated repulsion signals	13622.8	12038.5	13438.2	14047.7	18232.8	15261	11787.2	15430	12252.9	24770.1	10262	23338	14796.9	32232.7	27209.1	14624.8	22205.5	19422.1	High	High	High	High	High	High	High	High	High	High	High
High	P27824	Calnexin OS=Homo sapiens OX=9606 GN=CANX PE=1 SV=2	7	3	36	3	592	67.5	4.6	59.4	protein metabolism;other metabolic processes;stress response;transport;other biological processes	plasma membrane;other membranes;ER/Golgi;translational apparatus;other cell component	signal transduction activity or receptor binding;other molecular function	Pf00262	821	CANX	B2R5V8; B4DGP8; B4E2T8; D3DWQ3; D6R9K3; hsa:821; P27824	ENSG00000127022; ENSG00000283777		Antigen Presentation: Folding, assembly and peptide loading of class I MHC; Maturation of spike protein; MHC class II antigen presentation; Assembly of Viral Components at the Budding Site; Calnexin/calreticulin cycle; Interleukin-35 Signalling; Interleukin-27 signaling; Maturation of spike protein	3562.14	2865.82	2405.67	6575.23	3896.97	1720.63	6270.57	4103.5	3353.32	9708.09	3025.03	3316.31	8866.03	2090.18	6929.07	6339.63	2091.61	4271.38	High	Peak Found	High	High	Peak Found	High	High	Peak Found	Peak Found	High	High
High	P54577	Tyrosine--tRNA ligase, cytoplasmic OS=Homo sapiens OX=9606 GN=YARS1 PE=1 SV=4	2	1	1	1	528	59.1	7.05	2.46	protein metabolism;RNA metabolism OR transcription;other metabolic processes;other biological processes	non-structural extracellular;cytosol;nucleus;other cell component	signal transduction activity or receptor binding;nucleic acid binding activity;other molecular function	Pf00579, Pf01588	8565	YARS1	B3KWK4; D3DPQ4; hsa:8565; O43276; P54577; Q53EN1	ENSG00000134684	Nephrotic syndrome	Cytosolic tRNA aminoacylation	14885.9	7512.03	8508.96	5734.7	3928.64	7941.47	2075.3	9504	9909.76	7222.32	5793.54	9180.84	1498.85	10178.7	10445.6	6324.55	10410.9	10997.6	Peak Found	Peak Found	Peak Found	Peak Found	Not Found	Peak Found	Not Found	Peak Found	Peak Found	Peak Found	Peak Found
High	P16070	CD44 antigen OS=Homo sapiens OX=9606 GN=CD44 PE=1 SV=3	1	1	32	1	742	81.5	5.33	24	cell adhesion;other metabolic processes;stress response;developmental processes;signal transduction;other biological processes	plasma membrane;other membranes;cytosol;ER/Golgi;other cell component	other molecular function	Pf00193	960	CD44	A5YRN9; B6EAT9; D3DR12; D3DR13; hsa:960; O95370; P16070; P22511; Q04858; Q13419; Q13957; Q13958; Q13959; Q13960; Q13961; Q13967; Q13968; Q13980; Q15861; Q16064; Q16065; Q16066; Q16208; Q16522; Q86T72; Q86Z27; Q8N694; Q92493; Q96J24; Q9H5A5; Q9UC28; Q9UC29; Q9UC30; Q9UCB0; Q9UJ36	ENSG00000026508	Hepatitis C and hepatocellular carcinoma; Wnt signaling pathway and pluripotency; Hippo-Merlin signaling dysregulation; Gastrin signaling pathway; Malignant pleural mesothelioma; CCL18 signaling pathway	Cell surface interactions at the vascular wall; Neutrophil degranulation; Interferon gamma signaling; Degradation of the extracellular matrix; Integrin cell surface interactions; Hyaluronan uptake and degradation	83910.7	72141.4	91987.6	79590.5	67907.1	108627	72853.2	126726	92082.7	101977	165246	177788	125464	256704	141250	161254	176822	194422	Peak Found	High	High	High	High	High	High	High	High	High	High
High	P10586	Receptor-type tyrosine-protein phosphatase F OS=Homo sapiens OX=9606 GN=PTPRF PE=1 SV=2	2	2	6	2	1907	212.7	6.3	4.9	cell adhesion;cell organization and biogenesis;protein metabolism;other metabolic processes;stress response;developmental processes;signal transduction;other biological processes	plasma membrane;other membranes;other cell component	other molecular function	Pf00041, Pf00102, Pf07679	5792	PTPRF	D3DPX6; D3DPX7; hsa:5792; P10586; Q5T021; Q5T022; Q5W9G2; Q86WS0	ENSG00000142949	Brain-derived neurotrophic factor (BDNF) signaling pathway; Insulin signaling	Synaptic adhesion-like molecules; Receptor-type tyrosine-protein phosphatases	8580.01	14621.7	17712	6108.81	16901.8	15445.6	12740.9	5618.01	15893.8	20852.8	13703.4	36617	26266.8	31577.5	27190.5	21359.1	23400.2	26495.7	Peak Found	Peak Found	Peak Found	Not Found	Peak Found	Peak Found	Peak Found	Not Found	Peak Found	High	Peak Found
High	Q76M96	Coiled-coil domain-containing protein 80 OS=Homo sapiens OX=9606 GN=CCDC80 PE=1 SV=1	10	9	39	9	950	108.1	9.72	52.61	cell organization and biogenesis;other biological processes	non-structural extracellular;extracellular matrix	other molecular function	Pf13778	151887	CCDC80	D3DN67; hsa:151887; Q5PR20; Q6GPG9; Q76M96; Q8IVT6; Q8NBV1; Q8NHY8	ENSG00000091986			38384.8	51348.9	41237.2	34846.2	47018.3	50565.3	50851.6	54070.2	46446.6	68173.6	52750.5	61130.8	91954.4	82554.6	69470.2	68790.9	90228.2	90851.6	Peak Found	High	Peak Found	Peak Found	Peak Found	Peak Found	High	Peak Found	High	Peak Found	High
High	P21926	CD9 antigen OS=Homo sapiens OX=9606 GN=CD9 PE=1 SV=4	7	2	36	2	228	25.4	7.15	58.22	cell adhesion;cell organization and biogenesis;stress response;transport;developmental processes;other biological processes	non-structural extracellular;plasma membrane;other membranes;other cell component	signal transduction activity or receptor binding	Pf00335	928	CD9	D3DUQ9; hsa:928; P21926; Q5J7W6; Q96ES4	ENSG00000010278	Vitamin D receptor pathway	Platelet degranulation ; Uptake and function of diphtheria toxin; Acrosome Reaction and Sperm:Oocyte Membrane Binding	49142.8	40248.1	47197.6	52003.7	45735.8	46223	56850.5	41129.2	49741.8	48204.3	68771.5	98967	95393.3	57661.9	80963.1	44532.4	62074.2	59652.3	High	Peak Found	High	High	High	High	High	High	High	High	High
High	P55285	Cadherin-6 OS=Homo sapiens OX=9606 GN=CDH6 PE=1 SV=1	2	1	9	1	790	88.3	4.93	15.15	cell adhesion;cell organization and biogenesis;signal transduction;other biological processes	plasma membrane;other membranes;nucleus;other cell component	other molecular function	Pf00028, Pf01049	1004	CDH6	A8K5H5; hsa:1004; P55285; Q9BWS0	ENSG00000113361	Neural crest differentiation; Ectoderm differentiation; Ectoderm differentiation; TGF-beta signaling in thyroid cells for epithelial-mesenchymal transition; Hippo signaling regulation pathways; Hippo-Merlin signaling dysregulation; Malignant pleural mesothelioma	Adherens junctions interactions	2739.49	2643.49	1907.17	2709.69	2634.61	4145.72	2130.09	3785.34	2992.42	29922.6	4864.4	3157.54	9816.09	3094.27	4745.26	10224.3	3127.31	2905.32	Not Found	Not Found	Not Found	Not Found	Not Found	Not Found	Not Found	Not Found	Not Found	High	High
High	O15230	Laminin subunit alpha-5 OS=Homo sapiens OX=9606 GN=LAMA5 PE=1 SV=8	1	3	20	3	3695	399.5	7.02	26.12	cell adhesion;cell organization and biogenesis;developmental processes;signal transduction;other biological processes	non-structural extracellular;extracellular matrix;other cell component	signal transduction activity or receptor binding;extracellular structural activity	Pf00052, Pf00053, Pf00054, Pf00055, Pf02210, Pf06008, Pf06009	3911	LAMA5	hsa:3911; O15230; Q5U4N9; Q8TDF8; Q8WZA7; Q9H1P1	ENSG00000130702	Alpha 6 beta 4 signaling pathway; Primary focal segmental glomerulosclerosis (FSGS); Complement system; Focal adhesion; Focal adhesion: PI3K-Akt-mTOR-signaling pathway; PI3K-Akt signaling pathway; Inflammatory response pathway; Small cell lung cancer; Malignant pleural mesothelioma	ECM proteoglycans; Non-integrin membrane-ECM interactions; Degradation of the extracellular matrix; Interleukin-4 and Interleukin-13 signaling; Laminin interactions; MET activates PTK2 signaling	159166	19661.7	24036.8	104021	21289.8	17791.4	82515.2	19969	24489.1	72889.4	32603.7	25700.8	72292.3	33635.7	37048.1	67409.1	44629.8	33246.8	Peak Found	High	High	Peak Found	Peak Found	Peak Found	High	High	High	High	High
High	Q9UHN6	Cell surface hyaluronidase OS=Homo sapiens OX=9606 GN=CEMIP2 PE=1 SV=1	3	3	22	3	1383	154.3	8.15	37.67	other metabolic processes;developmental processes;other biological processes	plasma membrane;other membranes;cytosol;nucleus;other cell component	other molecular function	Pf10162, Pf15711	23670	CEMIP2	A6H8W9; B2RTQ6; hsa:23670; Q5T838; Q5T839; Q5T840; Q5T841; Q8NBP6; Q9P2D5; Q9UHN6	ENSG00000135048			85375	78509.8	51502.1	68236.8	71913	86394.9	63179.5	77790.9	99880.6	139919	138225	125831	174693	92085.5	124654	70195.6	129456	189507	Peak Found	Peak Found	Peak Found	High	High	Peak Found	High	High	Peak Found	High	High
High	P41091	Eukaryotic translation initiation factor 2 subunit 3 OS=Homo sapiens OX=9606 GN=EIF2S3 PE=1 SV=3	4	2	11	2	472	51.1	8.4	17.08	cell organization and biogenesis;protein metabolism;other metabolic processes;other biological processes	cytosol;other cell component	nucleic acid binding activity;other molecular function	Pf00009, Pf03144, Pf09173	1968	EIF2S3	A0A024RBY4; A8K2Y2; B2R5N2; B5BTZ4; hsa:1968; P41091; Q53HK3	ENSG00000130741	Translation factors; nsp1 from SARS-CoV-2 inhibits translation initiation in the host cell	L13a-mediated translational silencing of Ceruloplasmin expression; GTP hydrolysis and joining of the 60S ribosomal subunit; Response of EIF2AK4 (GCN2) to amino acid deficiency; Translation initiation complex formation; Formation of the ternary complex, and subsequently, the 43S complex; Ribosomal scanning and start codon recognition; ABC-family proteins mediated transport; PERK regulates gene exp…	3026.52	13559.3	14703.2	9187.06	19852.3	16049.2	10301.1	12908.6	14885.3	24108.6	24830.1	34098.2	20571.9	38226.1	27467	17034.5	38036.7	29926.6	Not Found	Peak Found	Peak Found	Peak Found	Peak Found	Peak Found	Peak Found	High	Peak Found	High	High
High	O00339	Matrilin-2 OS=Homo sapiens OX=9606 GN=MATN2 PE=1 SV=4	7	6	84	6	956	106.8	6.27	135.57	cell organization and biogenesis	non-structural extracellular;extracellular matrix	extracellular structural activity;other molecular function	Pf00092, Pf07645, Pf10393, Pf12662, Pf14670	4147	MATN2	A8K106; E7EW74; E9PD48; E9PGL2; hsa:4147; O00339; Q6UWA5; Q7Z5X1; Q8NDE6; Q96FT5; Q9NSZ1	ENSG00000132561			76981.5	158418	160669	128814	176778	126226	120612	168214	159336	172293	153337	211227	203794	218530	255089	124631	332073	240932	High	High	Peak Found	High	High	High	High	High	High	High	High
High	P68104	Elongation factor 1-alpha 1 OS=Homo sapiens OX=9606 GN=EEF1A1 PE=1 SV=1	31	11	69	11	462	50.1	9.01	114.1	protein metabolism;other metabolic processes;other biological processes	non-structural extracellular;plasma membrane;other membranes;cytosol;cytoskeleton;nucleus;other cytoplasmic organelle;other cell component	nucleic acid binding activity;other molecular function	Pf00009, Pf03143, Pf03144	1915	EEF1A1	hsa:1915; P04719; P04720; P68104; Q6IQ15	ENSG00000156508	Translation factors; Fragile X syndrome; 2q37 copy number variation syndrome	Neutrophil degranulation; Chaperone Mediated Autophagy; Peptide chain elongation; HSF1 activation; Protein methylation	98624	89849.3	85872.5	92229.3	110857	75635.2	73433.3	84273.2	106714	166749	141646	212275	148297	177175	156092	178486	176884	251460	High	High	Peak Found	High	High	High	High	Peak Found	High	High	High
High	P05362	Intercellular adhesion molecule 1 OS=Homo sapiens OX=9606 GN=ICAM1 PE=1 SV=2	13	6	139	6	532	57.8	7.99	274.32	cell adhesion;other biological processes	non-structural extracellular;plasma membrane;other membranes	signal transduction activity or receptor binding;other molecular function	Pf03921	3383	ICAM1	B2R6M3; hsa:3383; P05362; Q5NKV7; Q96B50	ENSG00000090339	Selenium micronutrient network; Vitamin B12 metabolism; Folate metabolism; RANKL/RANK signaling pathway; Interleukin-11 signaling pathway; Spinal cord injury; Complement system; IL1 and megakaryocytes in obesity; Photodynamic therapy-induced NF-kB survival signaling; VEGFA-VEGFR2 signaling pathway; miRNAs involvement in the immune response in sepsis; Cells and molecules involved in local acute in…	Immunoregulatory interactions between a Lymphoid and a non-Lymphoid cell; Interferon gamma signaling; Integrin cell surface interactions; Interleukin-4 and Interleukin-13 signaling; Interleukin-10 signaling	235778	222733	237927	190981	259157	224278	211060	302072	205956	303857	275976	381153	377236	436648	370359	252718	308846	292681	High	High	High	High	High	High	High	High	High	High	High
High	P29317	Ephrin type-A receptor 2 OS=Homo sapiens OX=9606 GN=EPHA2 PE=1 SV=2	1	1	3	1	976	108.2	6.23	6.1	cell adhesion;cell cycle OR cell proliferation;cell organization and biogenesis;protein metabolism;other metabolic processes;stress response;developmental processes;signal transduction;other biological processes	plasma membrane;other membranes;other cell component	kinase activity;other molecular function	Pf00041, Pf00536, Pf01404, Pf07714, Pf14575	1969	EPHA2	B5A968; hsa:1969; P29317; Q8N3Z2	ENSG00000142627	Nuclear receptors meta-pathway; NRF2 pathway; VEGFA-VEGFR2 signaling pathway; Focal adhesion: PI3K-Akt-mTOR-signaling pathway; PI3K-Akt signaling pathway; Ras signaling; Hippo signaling regulation pathways; Hippo-Merlin signaling dysregulation; Malignant pleural mesothelioma	EPHA-mediated growth cone collapse; EPH-ephrin mediated repulsion of cells; RHOV GTPase cycle; RHOU GTPase cycle; RND2 GTPase cycle; RAC1 GTPase cycle; RHOG GTPase cycle; RAC2 GTPase cycle; RAC3 GTPase cycle; RND3 GTPase cycle; RND1 GTPase cycle	27714.5	1675.27	2760.8	34206.4	7361.02	2773.52	20952.1	1919.04	10397.3	8511.29	6344.84	11332.8	22877	12362.5	10811.4	31458.8	23933.7	8195.39	Peak Found	Not Found	Not Found	Peak Found	Peak Found	Not Found	Peak Found	Not Found	Peak Found	Peak Found	High
High	P05783	Keratin, type I cytoskeletal 18 OS=Homo sapiens OX=9606 GN=KRT18 PE=1 SV=2	22	11	209	11	430	48	5.45	341.16	cell cycle OR cell proliferation;cell organization and biogenesis;transport;signal transduction;other biological processes	cytosol;cytoskeleton;nucleus;other cell component	other molecular function	Pf00038	3875	KRT18	hsa:3875; P05783; Q53G38; Q5U0N8; Q9BW26	ENSG00000111057	Pathogenic Escherichia coli infection	Formation of the cornified envelope	1.1123e+06	931806	1.44817e+06	932635	1.04747e+06	924602	1.01852e+06	1.05741e+06	968625	1.31873e+06	1.26026e+06	1.59506e+06	1.48211e+06	1.82903e+06	1.55325e+06	2.32479e+06	3.10015e+06	3.15843e+06	High	High	High	High	High	High	High	High	High	High	High
High	Q92692	Nectin-2 OS=Homo sapiens OX=9606 GN=NECTIN2 PE=1 SV=1	3	1	4	1	538	57.7	4.82	1.82	cell adhesion;cell organization and biogenesis;other biological processes	plasma membrane;other membranes;other cell component	other molecular function	Pf07686, Pf08205	5819	NECTIN2	A8K5L5; hsa:5819; O75455; Q6IBI6; Q92692; Q96J29	ENSG00000130202	Monoamine transport	Immunoregulatory interactions between a Lymphoid and a non-Lymphoid cell; Nectin/Necl trans heterodimerization	2924.89	3803.31	3094.38	3611.56	3675.04	3025.31	3793.07	3348.22	3993.5	1617.18	5449.08	1570.74	2260.77	9754.63	5912.91	2098.17	5266.81	3947.65	Not Found	Not Found	Not Found	Not Found	Not Found	Not Found	Not Found	Not Found	High	Not Found	High
High	P98160	Basement membrane-specific heparan sulfate proteoglycan core protein OS=Homo sapiens OX=9606 GN=HSPG2 PE=1 SV=4	2	8	118	8	4391	468.5	6.51	206.7	other metabolic processes;stress response;transport;developmental processes;other biological processes	extracellular matrix;plasma membrane;other membranes;ER/Golgi;other cytoplasmic organelle	signal transduction activity or receptor binding;extracellular structural activity;other molecular function	Pf00008, Pf00052, Pf00053, Pf00054, Pf00057, Pf02210, Pf07679, Pf13927	3339	HSPG2	hsa:3339; P98160; Q16287; Q5SZI3; Q9H3V5	ENSG00000142798	Hepatitis B infection	Integrin cell surface interactions; ECM proteoglycans; A tetrasaccharide linker sequence is required for GAG synthesis; HS-GAG biosynthesis; HS-GAG degradation; Non-integrin membrane-ECM interactions; Defective B4GALT7 causes EDS, progeroid type; Defective B3GAT3 causes JDSSDHD; Defective EXT2 causes exostoses 2; Defective EXT1 causes exostoses 1, TRPS2 and CHDS; Defective B3GALT6 causes EDSP2 an…	146271	143433	161625	128391	130013	147443	143944	149890	231213	145741	196963	176516	161735	239130	212752	150074	206202	246908	High	High	High	High	High	High	High	High	High	High	High
High	P35579	Myosin-9 OS=Homo sapiens OX=9606 GN=MYH9 PE=1 SV=4	5	10	88	9	1960	226.4	5.6	120.14	cell cycle OR cell proliferation;cell organization and biogenesis;protein metabolism;stress response;transport;developmental processes;signal transduction;other biological processes	plasma membrane;other membranes;cytosol;cytoskeleton;nucleus;other cell component	signal transduction activity or receptor binding;cytoskeletal activity;other molecular function	Pf00063, Pf01576, Pf02736	4627	MYH9	A8K6E4; hsa:4627; O60805; P35579; Q60FE2; Q86T83	ENSG00000100345	Primary focal segmental glomerulosclerosis (FSGS); VEGFA-VEGFR2 signaling pathway; Nephrotic syndrome	Regulation of actin dynamics for phagocytic cup formation; FCGR3A-mediated phagocytosis; Signaling by ALK fusions and activated point mutants; Sensory processing of sound by inner hair cells of the cochlea; Sensory processing of sound by outer hair cells of the cochlea; Translocation of SLC2A4 (GLUT4) to the plasma membrane; RHO GTPases activate CIT; EPHA-mediated growth cone collapse; Sema4D ind…	75860.2	103946	108365	90367	170801	97659	92529.5	91753.8	89590.6	135613	135382	147014	121397	159441	168703	106042	130482	135083	High	High	High	High	High	High	High	High	High	High	High
High	O75841	Uroplakin-1b OS=Homo sapiens OX=9606 GN=UPK1B PE=1 SV=5	4	1	19	1	260	29.6	5.35	42.31	other biological processes	plasma membrane;other membranes	other molecular function	Pf00335	7348	UPK1B	hsa:7348; O60753; O75841; Q9UIM2; Q9UNX6	ENSG00000114638			22147.2	12084.1	25320.9	3819.92	21976.8	17071.5	17917.8	20462.4	20490.6	29118.5	17993.8	28698.8	41899	27743.3	22835.9	22719.5	49427.9	45408.2	Peak Found	High	High	Not Found	High	High	High	High	High	High	High
High	P08174	Complement decay-accelerating factor OS=Homo sapiens OX=9606 GN=CD55 PE=1 SV=4	3	1	7	1	381	41.4	7.59	11.74	other metabolic processes;stress response;other biological processes	non-structural extracellular;plasma membrane;other membranes;ER/Golgi;other cell component	other molecular function	Pf00084	1604	CD55	B1AP14; D3DT83; D3DT84; E7ER69; hsa:1604; P08174; P09679; P78361; Q14UF2; Q14UF3; Q14UF4; Q14UF5; Q14UF6	ENSG00000196352	Allograft rejection; Complement system; Acute viral myocarditis; Complement system in neuronal development and plasticity; Complement activation; Complement and coagulation cascades	Regulation of Complement cascade; Neutrophil degranulation; COPI-mediated anterograde transport; Class B/2 (Secretin family receptors)	8714.52	8344.37	6910.08	5712.49	7084.01	8959.84	2562.56	13377.2	7460.86	9966.21	8850.62	11090.4	7530.54	11376.2	12159.8	5211.02	15284.1	8971.52	Peak Found	Peak Found	Peak Found	Peak Found	Peak Found	Peak Found	Not Found	Peak Found	High	Peak Found	High
High	P09874	Poly [ADP-ribose] polymerase 1 OS=Homo sapiens OX=9606 GN=PARP1 PE=1 SV=4	1	1	10	1	1014	113	8.88	10.62	cell organization and biogenesis;protein metabolism;DNA metabolism;RNA metabolism OR transcription;other metabolic processes;stress response;developmental processes;signal transduction;other biological processes	mitochondrion;nucleus;other cell component	nucleic acid binding activity;other molecular function	Pf00533, Pf00644, Pf00645, Pf02877, Pf05406, Pf08063	142	PARP1	B1ANJ4; hsa:142; P09874; Q8IUZ9	ENSG00000143799	Corticotropin-releasing hormone signaling pathway; Nanoparticle triggered regulated necrosis; Fas ligand pathway and stress induction of heat shock proteins; NAD metabolism, sirtuins and aging; NAD+ metabolism; NAD+ biosynthetic pathways; Breast cancer pathway; Acute viral myocarditis; Joubert syndrome; Male infertility; Base excision repair; IL-18 signaling pathway; DNA repair pathways, full net…	SUMOylation of DNA damage response and repair proteins; Downregulation of SMAD2/3:SMAD4 transcriptional activity; HDR through MMEJ (alt-NHEJ); Formation of Incision Complex in GG-NER; DNA Damage Recognition in GG-NER; vRNA Synthesis; POLB-Dependent Long Patch Base Excision Repair; Dual Incision in GG-NER	14025.6	14885.3	8031.93	15099.8	20057.1	9457.9	13386.1	14182.1	11799.9	38890.6	16891.9	19746.9	13185.9	24088.1	34921.1	17808.5	20797.1	38187.7	Peak Found	Peak Found	Peak Found	Peak Found	Peak Found	Peak Found	Peak Found	Peak Found	High	High	High
High	Q14677	Clathrin interactor 1 OS=Homo sapiens OX=9606 GN=CLINT1 PE=1 SV=1	6	2	10	2	625	68.2	6.42	15.11	transport	plasma membrane;other membranes;cytosol;ER/Golgi;nucleus;other cytoplasmic organelle;other cell component	other molecular function	Pf01417	9685	CLINT1	B7Z6F8; D3DQJ6; hsa:9685; Q14677; Q8NAF1; Q96E05	ENSG00000113282		Golgi Associated Vesicle Biogenesis	36272.3	26083.2	19630.9	17373.2	10231.7	14742	27535.9	32901.4	35522.4	15543.3	18367.4	22792.3	22841	29382.9	23483.4	18124.3	21430.4	34395.5	High	High	Peak Found	High	Peak Found	High	High	High	High	Peak Found	Peak Found
High	O95084	Serine protease 23 OS=Homo sapiens OX=9606 GN=PRSS23 PE=1 SV=1	16	8	213	8	383	43	9.42	401.05		ER/Golgi;nucleus	other molecular function	Pf00089	11098	PRSS23	B2RDJ1; B4E2J3; hsa:11098; O95084; Q6IBI0	ENSG00000150687	Malignant pleural mesothelioma	Regulation of Insulin-like Growth Factor (IGF) transport and uptake by Insulin-like Growth Factor Binding Proteins (IGFBPs); Post-translational protein phosphorylation	387734	360959	373117	516884	458982	439294	360026	505676	453725	400932	440109	546320	561855	766125	730643	484615	761722	676412	High	High	High	High	High	High	High	High	High	High	High
High	P55268	Laminin subunit beta-2 OS=Homo sapiens OX=9606 GN=LAMB2 PE=1 SV=2	1	1	5	1	1798	195.9	6.52	6.86	cell adhesion;cell organization and biogenesis;stress response;developmental processes;other biological processes	non-structural extracellular;extracellular matrix;ER/Golgi;other cell component	signal transduction activity or receptor binding;extracellular structural activity;other molecular function	Pf00053, Pf00055	3913	LAMB2	hsa:3913; P55268; Q16321	ENSG00000172037	Alpha 6 beta 4 signaling pathway; Primary focal segmental glomerulosclerosis (FSGS); miRNA targets in ECM and membrane receptors; Focal adhesion; Focal adhesion: PI3K-Akt-mTOR-signaling pathway; PI3K-Akt signaling pathway; Inflammatory response pathway; Small cell lung cancer; Nephrotic syndrome; Genes controlling nephrogenesis; Malignant pleural mesothelioma	ECM proteoglycans; Non-integrin membrane-ECM interactions; Laminin interactions; MET activates PTK2 signaling; Regulation of Insulin-like Growth Factor (IGF) transport and uptake by Insulin-like Growth Factor Binding Proteins (IGFBPs); Post-translational protein phosphorylation	3614.04	2326.62	7877.37	3211.48	5291.04	2274.65	2892.63	5292.55	5689.84	7827.98	5067.69	10827.5	5040.24	10726.1	5008.81	6085.02	7526.8	5287.61	Not Found	Not Found	Peak Found	Not Found	Peak Found	Not Found	Not Found	High	Peak Found	Peak Found	High
High	P32004	Neural cell adhesion molecule L1 OS=Homo sapiens OX=9606 GN=L1CAM PE=1 SV=2	3	3	21	3	1257	139.9	6.24	28.93	cell adhesion;cell organization and biogenesis;developmental processes;other biological processes	plasma membrane;other membranes;other cell component	other molecular function	Pf00041, Pf07679, Pf13882, Pf13927	3897	L1CAM	A0AV65; A4ZYW4; B2RMU7; G3XAF4; hsa:3897; P32004; Q8TA87	ENSG00000198910		Recycling pathway of L1; Interaction between L1 and Ankyrins; Signal transduction by L1; Basigin interactions	22050.8	24201.7	28055.9	24950.7	26913.7	25083.4	24617.6	43019.4	22925.8	22919.4	36367.6	65564.6	28293.1	42445.2	39319.6	23511.7	40582.7	45266.5	Peak Found	High	High	Peak Found	High	High	Peak Found	Peak Found	High	High	High
High	P39019	40S ribosomal protein S19 OS=Homo sapiens OX=9606 GN=RPS19 PE=1 SV=2	8	1	6	1	145	16.1	10.32	11.56	cell organization and biogenesis;protein metabolism;RNA metabolism OR transcription;other metabolic processes;stress response;developmental processes;other biological processes	cytosol;translational apparatus;nucleus;other cell component	other molecular function	Pf01090	6223	RPS19	hsa:6223; P39019	ENSG00000105372	Complement system; Cytoplasmic ribosomal proteins	Regulation of expression of SLITs and ROBOs; Nonsense Mediated Decay (NMD) enhanced by the Exon Junction Complex (EJC); L13a-mediated translational silencing of Ceruloplasmin expression; Formation of a pool of free 40S subunits; GTP hydrolysis and joining of the 60S ribosomal subunit; Major pathway of rRNA processing in the nucleolus and cytosol; SRP-dependent cotranslational protein targeting to…	10901.2	7171.19	4576.69	7195.59	7545.75	7643.94	10901	3439.25	3513.47	7955.54	9935.14	11116.8	11550.9	11752.7	11907.6	9280.77	10680.2	8377.67	Peak Found	Peak Found	Peak Found	Peak Found	Peak Found	Peak Found	Peak Found	Not Found	Not Found	Peak Found	High
High	P26006	Integrin alpha-3 OS=Homo sapiens OX=9606 GN=ITGA3 PE=1 SV=5	6	6	122	6	1051	116.5	6.77	268.44	cell adhesion;cell organization and biogenesis;developmental processes;signal transduction;other biological processes	plasma membrane;other membranes;other cell component	signal transduction activity or receptor binding;other molecular function	Pf01839, Pf08441	3675	ITGA3	A7E246; B7ZM80; B9EGQ1; D3DTX4; D3DTX5; hsa:3675; P26006	ENSG00000005884	Integrin-mediated cell adhesion; Arrhythmogenic right ventricular cardiomyopathy; Primary focal segmental glomerulosclerosis (FSGS); Focal adhesion; Focal adhesion: PI3K-Akt-mTOR-signaling pathway; PI3K-Akt signaling pathway; Ebola virus infection in host; Small cell lung cancer; Nephrotic syndrome; Genes controlling nephrogenesis; Malignant pleural mesothelioma; GDNF signaling	Integrin cell surface interactions; Laminin interactions; MET activates PTK2 signaling; Basigin interactions	276988	294316	334561	329827	276999	237485	215371	373521	281199	334429	321454	309884	347721	442318	429842	307342	422292	484762	High	High	High	High	High	High	High	High	High	High	High
High	Q86SQ4	Adhesion G-protein coupled receptor G6 OS=Homo sapiens OX=9606 GN=ADGRG6 PE=1 SV=3	1	1	6	1	1221	136.6	7.87	10.03	developmental processes;signal transduction	plasma membrane;other membranes;ER/Golgi;other cell component	other molecular function	Pf00002, Pf00354, Pf00431, Pf01825	57211	ADGRG6	hsa:57211; Q5TGN7; Q6DHZ4; Q6F3F5; Q6F3F6; Q6F3F7; Q6F3F8; Q6MZU7; Q86SQ4; Q8IXA4; Q8NC14; Q96JW0	ENSG00000112414		EGR2 and SOX10-mediated initiation of Schwann cell myelination	3258.2	1935.48	2179.39	2043.97	3729.51	3190.26	3826	4592.85	4520.48	6145.94	5496.01	6216.87	4935.57	5605.83	4340.23	8510.29	4392.97	5795.68	Not Found	Not Found	Not Found	Not Found	Not Found	Not Found	Peak Found	Peak Found	Peak Found	High	High
High	P08581	Hepatocyte growth factor receptor OS=Homo sapiens OX=9606 GN=MET PE=1 SV=4	1	2	10	2	1390	155.4	7.33	15.81	protein metabolism;other metabolic processes;transport;developmental processes;signal transduction;other biological processes	non-structural extracellular;plasma membrane;other membranes;other cell component	kinase activity;other molecular function	Pf01403, Pf01437, Pf01833, Pf07714	4233	MET	A1L467; B5A932; E7EQ94; hsa:4233; O60366; P08581; Q12875; Q9UDX7; Q9UPL8	ENSG00000105976	Glioblastoma signaling pathways; Extracellular vesicle-mediated signaling in recipient cells; Focal adhesion; Hepatocyte growth factor receptor signaling; TGF-beta signaling pathway; Focal adhesion: PI3K-Akt-mTOR-signaling pathway; PI3K-Akt signaling pathway; Ras signaling; Hippo signaling regulation pathways; Hippo-Merlin signaling dysregulation; EGFR tyrosine kinase inhibitor resistance; Malign…	MET activates PTK2 signaling; MET interacts with TNS proteins; PI5P, PP2A and IER3 Regulate PI3K/AKT Signaling; PIP3 activates AKT signaling; Constitutive Signaling by Aberrant PI3K in Cancer; RAF/MAP kinase cascade; Negative regulation of MET activity; InlB-mediated entry of Listeria monocytogenes into host cell; Sema4D mediated inhibition of cell attachment and migration; MET Receptor Activatio…	26832.3	11670.1	24803.9	25797.9	21059.6	22406.5	26234.4	20965.7	17703	27762	18183	28433.7	28300.1	37543.6	34511.4	25935	25803.6	23313.3	Peak Found	Peak Found	Peak Found	Peak Found	High	Peak Found	Peak Found	High	High	High	Peak Found
High	Q16777	Histone H2A type 2-C OS=Homo sapiens OX=9606 GN=H2AC20 PE=1 SV=4	33	4	67	4	129	14	10.9	75.85		nucleus;other cell component	nucleic acid binding activity;other molecular function	Pf00125, Pf16211	8338	H2AC20	hsa:8338; Q16777; Q6DRA7; Q8IUE5	ENSG00000184260		HCMV Early Events; Defective pyroptosis; Estrogen-dependent gene expression; Amyloid fiber formation; Meiotic synapsis; HCMV Late Events; Ub-specific processing proteases; RUNX1 regulates transcription of genes involved in differentiation of HSCs; Transcriptional regulation by small RNAs; Deposition of new CENPA-containing nucleosomes at the centromere; B-WICH complex positively regulates rRNA ex…	74338.8	21060.1	30498.5	49757.2	26975.2	19347	23790.2	28890.5	27494.2	48277.3	44087.5	70938.3	34348	41145.9	45096.7	27076.8	35786	36501.8	High	High	High	High	High	High	High	High	High	High	High
High	Q9NZU0	Leucine-rich repeat transmembrane protein FLRT3 OS=Homo sapiens OX=9606 GN=FLRT3 PE=1 SV=1	2	1	6	1	649	73	7.64	9.22	cell adhesion;cell organization and biogenesis;stress response;developmental processes;signal transduction;other biological processes	non-structural extracellular;extracellular matrix;plasma membrane;other membranes;cytosol;ER/Golgi;other cell component	signal transduction activity or receptor binding;other molecular function	Pf13855	23767	FLRT3	D3DW20; hsa:23767; Q542Z9; Q96K39; Q96K42; Q96KB1; Q9NZU0; Q9P259	ENSG00000125848		Signaling by ROBO receptors; Downstream signaling of activated FGFR1	2434.47	8936.87	11338.5	6347.8	9043.2	3895.2	7563.79	9230.55	13075.6	10012.9	17775.2	13727.3	37997.5	9519.22	9680.14	10884.7	18145.6	18361.6	Not Found	Peak Found	Peak Found	Peak Found	High	Not Found	Peak Found	Peak Found	Peak Found	Peak Found	High
High	Q9GZN8	UPF0687 protein C20orf27 OS=Homo sapiens OX=9606 GN=C20orf27 PE=1 SV=3	6	1	16	1	174	19.3	6.84	19.88	other biological processes		other molecular function	Pf15006	54976	C20orf27	A8K4J0; D3DVX8; hsa:54976; Q5JX81; Q9GZN8; Q9NWX3	ENSG00000101220			13864.4	11745.1	3765.76	17322.8	18561.3	19412.6	10722.9	11694.6	10601.3	25126.1	20638.5	25004.9	33009	23486.2	27885.8	18242.7	36310.6	26634.6	High	Peak Found	Not Found	High	High	Peak Found	High	High	Peak Found	High	High
High	P00558	Phosphoglycerate kinase 1 OS=Homo sapiens OX=9606 GN=PGK1 PE=1 SV=3	3	1	6	1	417	44.6	8.1	10.02	protein metabolism;other metabolic processes;stress response;other biological processes	non-structural extracellular;other membranes;cytosol	kinase activity;other molecular function	Pf00162	5230	PGK1	A8K4W6; B7Z7A9; hsa:5230; P00558; Q5J7W1; Q6IBT6; Q8NI87	ENSG00000102144	Cori cycle; Photodynamic therapy-induced HIF-1 survival signaling; VEGFA-VEGFR2 signaling pathway; Clear cell renal cell carcinoma pathways; Metabolic reprogramming in colon cancer; Aerobic glycolysis; Glycolysis in senescence; Glycolysis and gluconeogenesis	Glycolysis; Gluconeogenesis; Manipulation of host energy metabolism	38396.2	6492.32	5616.13	4366.88	3958.65	3537.23	2010.16	3293.65	4059.21	7288.72	5816.69	5537.83	10179.9	5932.02	4225.62	4879.65	7091.39	6902.44	Peak Found	Peak Found	Peak Found	Peak Found	Not Found	Not Found	High	Peak Found	Not Found	High	High
High	Q9H361	Polyadenylate-binding protein 3 OS=Homo sapiens OX=9606 GN=PABPC3 PE=1 SV=2	3	2	10	2	631	70	9.67	12.22	RNA metabolism OR transcription;other metabolic processes	cytosol;nucleus;other cell component	nucleic acid binding activity	Pf00076, Pf00658	5042	PABPC3	hsa:5042; Q8NHV0; Q9H086; Q9H361	ENSG00000151846			2505.57	2486.59	2284.01	4100.64	4163.92	2018.03	2294.64	1437.68	2270.5	3222.38	4326.42	6625.24	3994.44	7049.46	6113.35	3226.94	6454.49	4630.77	Peak Found	Peak Found	Peak Found	High	Peak Found	Peak Found	Peak Found	Peak Found	Not Found	High	High
High	P21589	5'-nucleotidase OS=Homo sapiens OX=9606 GN=NT5E PE=1 SV=1	5	3	28	3	574	63.3	7.03	36.76	cell adhesion;DNA metabolism;other metabolic processes;other biological processes	plasma membrane;other membranes;cytosol;nucleus	other molecular function	Pf00149, Pf02872	4907	NT5E	B3KQI8; hsa:4907; O75520; P21589; Q5W116	ENSG00000135318	Pluripotent stem cell differentiation pathway; NAD+ metabolism	Purine catabolism; Purinergic signaling in leishmaniasis infection; Pyrimidine catabolism; Nicotinate metabolism	34539.9	28438.1	32460.1	25054.9	50007.2	29143.4	31995	28795.3	30592.5	40603.2	32405.7	36738.9	32463.1	43211.7	43816.6	29222.1	48916.4	52367.7	High	High	High	High	High	High	High	High	High	High	High
High	P0DJI9	Serum amyloid A-2 protein OS=Homo sapiens OX=9606 GN=SAA2 PE=1 SV=1	18	2	21	2	122	13.5	9.14	44.32	stress response	non-structural extracellular		Pf00277	6289	SAA2	G3XAK9; hsa:6289; P02735; P02736; P02737; P0DJI9; Q16730; Q16834; Q16835; Q16879; Q3KRB3; Q6FG67; Q96QN0; Q9UCK9; Q9UCL0	ENSG00000134339	Selenium micronutrient network; Vitamin B12 metabolism; Folate metabolism; Network map of SARS-CoV-2 signaling pathway		38693.9	22293.1	32474.1	59998.1	27145.4	42958	48455.2	41237.9	49789.5	30603.8	35249.7	38571.4	63177.8	60666.7	73961	40487.8	83654.3	54134.1	Peak Found	Peak Found	High	High	Peak Found	Peak Found	High	High	High	Peak Found	High
High	P28482	Mitogen-activated protein kinase 1 OS=Homo sapiens OX=9606 GN=MAPK1 PE=1 SV=3	3	1	4	1	360	41.4	6.98	3.57	cell-cell signaling;cell cycle OR cell proliferation;protein metabolism;other metabolic processes;stress response;transport;developmental processes;signal transduction;other biological processes	non-structural extracellular;plasma membrane;other membranes;cytosol;cytoskeleton;mitochondrion;ER/Golgi;nucleus;other cytoplasmic organelle;other cell component	nucleic acid binding activity;kinase activity;other molecular function	Pf00069	5594	MAPK1	A8CZ64; hsa:5594; P28482	ENSG00000100030	IL-5 signaling pathway; Osteopontin signaling; Physiological and pathological hypertrophy of the heart; Angiogenesis; MicroRNAs in cardiomyocyte hypertrophy; Type II diabetes mellitus; Heart development; Integrin-mediated cell adhesion; IL-1 signaling pathway; RANKL/RANK signaling pathway; Thyroid stimulating hormone (TSH) signaling pathway; Leptin signaling pathway; Follicle stimulating hormone …	Regulation of actin dynamics for phagocytic cup formation; FCERI mediated MAPK activation; FCGR3A-mediated phagocytosis; Recycling pathway of L1; Neutrophil degranulation; Estrogen-dependent nuclear events downstream of ESR-membrane signaling; RHO GTPases Activate WASPs and WAVEs; SMAD2/SMAD3:SMAD4 heterotrimer regulates transcription; Oxidative Stress Induced Senescence; Senescence-Associated Se…	2133.74	3220.13	4664.65	4004.01	1727.75	3586.62	5646.74	4021.98	8079.48	5395.69	4518.24	4905.6	4500.79	5216.84	5296.12	4409.98	4943.57	6257.46	Not Found	Not Found	High	Not Found	Not Found	Not Found	High	Peak Found	Peak Found	Peak Found	Peak Found
High	P13639	Elongation factor 2 OS=Homo sapiens OX=9606 GN=EEF2 PE=1 SV=4	3	2	2	2	858	95.3	6.83	4.12	protein metabolism;other metabolic processes;developmental processes;other biological processes	non-structural extracellular;plasma membrane;other membranes;cytosol;other cell component	translation activity;nucleic acid binding activity;other molecular function	Pf00009, Pf00679, Pf03144, Pf03764, Pf14492	1938	EEF2	B2RMP5; D6W618; hsa:1938; P13639; Q58J86	ENSG00000167658	Translation factors; AMP-activated protein kinase (AMPK) signaling; Brain-derived neurotrophic factor (BDNF) signaling pathway; IL-18 signaling pathway	Neutrophil degranulation; Peptide chain elongation; Protein methylation; Uptake and function of diphtheria toxin; Synthesis of diphthamide-EEF2	3349.69	9443.94	1525.43	1687.4	10399.6	7265.46	1807.47	6741.34	2661.75	1572.37	9656.71	14157.2	1732.15	15301.9	10528.4	4142.68	11923.9	11143	Peak Found	Peak Found	Peak Found	Peak Found	Peak Found	Peak Found	Peak Found	Peak Found	Not Found	High	High
High	Q9Y4K0	Lysyl oxidase homolog 2 OS=Homo sapiens OX=9606 GN=LOXL2 PE=1 SV=1	4	3	38	3	774	86.7	6.38	71.17	cell adhesion;cell cycle OR cell proliferation;cell organization and biogenesis;protein metabolism;other metabolic processes;stress response;transport;developmental processes;other biological processes	non-structural extracellular;extracellular matrix;other membranes;ER/Golgi;nucleus;other cell component	other molecular function	Pf00530, Pf01186	4017	LOXL2	B2R5Q0; hsa:4017; Q53HV3; Q9BW70; Q9Y4K0; Q9Y5Y8	ENSG00000134013	Canonical and non-canonical TGF-B signaling	Elastic fibre formation; Crosslinking of collagen fibrils	25607.5	39548.4	48304	31477.1	43940.6	36851.6	35765.7	58404.6	49951.3	43162.1	43820.4	56495.5	53196.6	138504	48159.3	41894.7	72959.2	71752	High	High	High	High	High	High	High	High	High	High	High
High	Q9NY30-2	Isoform 2 of Protein BTG4 OS=Homo sapiens OX=9606 GN=BTG4	4	1	1	1	206	24	8.78	1.82						BTG4	Q9NY30-2				2288.47	1431.33	3984.77	2680.58	3843.14	1509.28	3089.21	2861.51	3383.74	1606.91	3862.42	1550.28	3354.27	4175.18	3860.63	1913.75	2179.46	6661.74	Not Found	Not Found	Not Found	Not Found	Not Found	Not Found	Not Found	Not Found	Not Found	Not Found	Not Found
High	Q99623	Prohibitin-2 OS=Homo sapiens OX=9606 GN=PHB2 PE=1 SV=2	7	2	4	2	299	33.3	9.83	4.08	cell cycle OR cell proliferation;cell organization and biogenesis;other metabolic processes;stress response;transport;developmental processes;signal transduction;other biological processes	plasma membrane;other membranes;mitochondrion;nucleus;other cell component	other molecular function	Pf01145	11331	PHB2	B4DP75; hsa:11331; Q2YDA4; Q7KYU3; Q92978; Q99623	ENSG00000215021		Processing of SMDT1	8513.24	7126.41	10501.2	14877.7	9589.91	7952.6	11441.5	10629.4	14056.1	8377.49	8857.53	15976	12936.5	29644.2	13756.5	10053.8	12992.7	11120.3	Peak Found	Peak Found	Peak Found	Peak Found	Peak Found	Peak Found	High	High	Peak Found	High	Peak Found
High	O95980	Reversion-inducing cysteine-rich protein with Kazal motifs OS=Homo sapiens OX=9606 GN=RECK PE=1 SV=1	1	1	7	1	971	106.4	6.74	3.73	cell-cell signaling;cell organization and biogenesis;developmental processes;signal transduction;other biological processes	non-structural extracellular;plasma membrane;other membranes;other cell component	enzyme regulator activity;other molecular function	Pf07648	8434	RECK	B2RNS1; hsa:8434; O95980; Q5W0K6; Q8WX37	ENSG00000122707		Post-translational modification: synthesis of GPI-anchored proteins	9563.96	21734.3	25038.6	7699.48	20180.7	21348.6	19853.9	15464.5	24078.7	18045.3	23253.8	27377.8	28832	32157.8	22178	23895.7	42215.9	26598.1	Peak Found	Peak Found	High	Peak Found	Peak Found	Peak Found	Peak Found	High	Peak Found	Peak Found	High
High	P46060	Ran GTPase-activating protein 1 OS=Homo sapiens OX=9606 GN=RANGAP1 PE=1 SV=1	2	1	5	1	587	63.5	4.68	10.35	protein metabolism;other metabolic processes;stress response;transport;signal transduction;other biological processes	other membranes;cytosol;cytoskeleton;nucleus;other cell component	enzyme regulator activity;nucleic acid binding activity;other molecular function	Pf07834, Pf13516	5905	RANGAP1	hsa:5905; P46060; Q96JJ2	ENSG00000100401	22q11.2 copy number variation syndrome; IL-18 signaling pathway	Separation of Sister Chromatids; Resolution of Sister Chromatid Cohesion; RHO GTPases Activate Formins; EML4 and NUDC in mitotic spindle formation; Rev-mediated nuclear export of HIV RNA; Amplification of signal from unattached kinetochores via a MAD2 inhibitory signal; Postmitotic nuclear pore complex (NPC) reformation; SUMOylation of DNA replication proteins	2195.86	5411.42	4090.55	1531.69	3940.92	4048.19	4052.14	5719.57	6502.42	4846.82	5221.73	6029.83	5103.17	5613.77	5898.3	4304.73	8410.3	6695.02	Not Found	Peak Found	Not Found	Not Found	Peak Found	Peak Found	Not Found	Peak Found	High	Peak Found	Peak Found
High	P68363	Tubulin alpha-1B chain OS=Homo sapiens OX=9606 GN=TUBA1B PE=1 SV=1	20	7	71	7	451	50.1	5.06	86.01	cell cycle OR cell proliferation;cell organization and biogenesis;transport;other biological processes	cytoskeleton;other cell component	cytoskeletal activity;nucleic acid binding activity;other molecular function	Pf00091, Pf03953	10376	TUBA1B	hsa:10376; P04687; P05209; P68363; Q27I68; Q8WU19	ENSG00000123416	Alzheimer's disease and miRNA effects; Pathogenic Escherichia coli infection; Allograft rejection; Parkin-ubiquitin proteasomal system pathway; Alzheimer's disease	RHOH GTPase cycle; RHO GTPases Activate Formins; HCMV Early Events; MHC class II antigen presentation; Recruitment of NuMA to mitotic centrosomes; COPI-mediated anterograde transport; Separation of Sister Chromatids; The role of GTSE1 in G2/M progression after G2 checkpoint; Aggrephagy; HSP90 chaperone cycle for steroid hormone receptors (SHR) in the presence of ligand; Translocation of SLC2A4 (G…	62814.1	29187.4	32408	55724.7	40881.4	28405.7	50355.4	31579.6	36337.3	55572.7	53107.6	53703.1	54887.4	61373	58105.8	57184.3	64076.2	64824.6	High	High	High	High	High	High	High	High	High	High	High
High	Q86XP3	ATP-dependent RNA helicase DDX42 OS=Homo sapiens OX=9606 GN=DDX42 PE=1 SV=1	12	10	120	10	938	102.9	7.02	243.47	other biological processes	cytosol;nucleus;other cell component	nucleic acid binding activity;other molecular function	Pf00270, Pf00271	11325	DDX42	A6NML1; A8KA43; hsa:11325; O75619; Q68G51; Q86XP3; Q96BK1; Q96HR7; Q9Y3V8	ENSG00000198231		mRNA Splicing - Major Pathway; mRNA Splicing - Minor Pathway	316980	243721	308371	306844	191749	212555	450942	295823	307689	286126	201521	173915	529576	198704	301875	224348	218900	260942	High	High	High	High	High	High	High	High	High	High	High
High	Q5VT06	Centrosome-associated protein 350 OS=Homo sapiens OX=9606 GN=CEP350 PE=1 SV=1	0	1	5	1	3117	350.7	6.33	5.24	cell organization and biogenesis;other biological processes	cytoskeleton;nucleus;other cell component	cytoskeletal activity	Pf01302, Pf14309	9857	CEP350	hsa:9857; O75068; Q5VT06; Q8TDK3; Q8WY20	ENSG00000135837	3q29 copy number variation syndrome		1680.4	7794.89	4757.82	6619.94	4675.34	1437.35	3667.02	5835.34	4578.53	3125.44	6041.92	5753.34	6035.94	7395.43	6639.32	5523.26	7744.87	7489.73	Not Found	Peak Found	Peak Found	Peak Found	Peak Found	Not Found	Peak Found	Peak Found	High	Peak Found	High
High	P62805	Histone H4 OS=Homo sapiens OX=9606 GN=H4C1 PE=1 SV=2	20	2	4	2	103	11.4	11.36	5.05	cell organization and biogenesis;RNA metabolism OR transcription;other metabolic processes;other biological processes	non-structural extracellular;nucleus;other cell component	nucleic acid binding activity;other molecular function	Pf15511	121504; 554313; 8294; 8359; 8360; 8361; 8362; 8363; 8364; 8365; 8366; 8367; 8368; 8370	H4-16; H4C1; H4C11; H4C12; H4C13; H4C14; H4C15; H4C2; H4C3; H4C4; H4C5; H4C6; H4C8; H4C9	A2VCL0; hsa:121504; hsa:554313; hsa:8294; hsa:8359; hsa:8360; hsa:8361; hsa:8362; hsa:8363; hsa:8364; hsa:8365; hsa:8366; hsa:8367; hsa:8368; hsa:8370; P02304; P02305; P62805; Q6DRA9; Q6FGB8; Q6NWP7	ENSG00000158406; ENSG00000197061; ENSG00000197238; ENSG00000197837; ENSG00000270276; ENSG00000270882; ENSG00000273542; ENSG00000274618; ENSG00000275126; ENSG00000276180; ENSG00000276966; ENSG00000277157; ENSG00000278637; ENSG00000278705	Gastric cancer network 1; Histone modifications; 22q11.2 copy number variation syndrome; Male infertility; Type II interferon signaling	HCMV Early Events; Defective pyroptosis; Estrogen-dependent gene expression; Amyloid fiber formation; Meiotic synapsis; HCMV Late Events; RUNX1 regulates transcription of genes involved in differentiation of HSCs; Transcriptional regulation by small RNAs; Deposition of new CENPA-containing nucleosomes at the centromere; B-WICH complex positively regulates rRNA expression; Recruitment and ATM-medi…	29806.1	30305.5	26135.3	62900.8	27706.8	24463.4	23463.5	30590	41434.1	43045.9	44599.1	64026.1	51768.8	39285.1	37319.6	32583.7	43623.9	34065.3	Peak Found	Peak Found	Peak Found	Peak Found	Peak Found	Peak Found	Peak Found	Peak Found	Peak Found	High	Peak Found
High	P18124	60S ribosomal protein L7 OS=Homo sapiens OX=9606 GN=RPL7 PE=1 SV=1	5	1	3	1	248	29.2	10.65	6.15	protein metabolism;RNA metabolism OR transcription;other metabolic processes;other biological processes	cytosol;translational apparatus;other cell component	nucleic acid binding activity;other molecular function	Pf00327, Pf08079	6129	RPL7	A8K504; hsa:6129; P18124; Q15289; Q3KQU0; Q5I0X1; Q6IBM9	ENSG00000147604	VEGFA-VEGFR2 signaling pathway; Cytoplasmic ribosomal proteins	L13a-mediated translational silencing of Ceruloplasmin expression; Formation of a pool of free 40S subunits; GTP hydrolysis and joining of the 60S ribosomal subunit; SRP-dependent cotranslational protein targeting to membrane; Regulation of expression of SLITs and ROBOs; Major pathway of rRNA processing in the nucleolus and cytosol; Nonsense Mediated Decay (NMD) enhanced by the Exon Junction Comp…	3287.19	2378.28	2412.59	3995.48	3095.05	3124.23	1879.05	2989.49	2586.97	3163.58	2938.02	1835.42	2207.62	6209.84	4423.89	2911.86	7007.51	3730.48	Not Found	Not Found	Not Found	Not Found	Not Found	Not Found	Not Found	Not Found	Not Found	Peak Found	Not Found
High	Q9NV96	Cell cycle control protein 50A OS=Homo sapiens OX=9606 GN=TMEM30A PE=1 SV=1	3	1	1	1	361	40.7	8.59	0	cell organization and biogenesis;transport;other biological processes	plasma membrane;other membranes;ER/Golgi;other cytoplasmic organelle;other cell component	transporter activity	Pf03381	55754	TMEM30A	A8K9V8; E1P539; hsa:55754; Q658Z3; Q96H09; Q9NSL9; Q9NV96	ENSG00000112697		Neutrophil degranulation	10438.8	14206.5	16897.4	2822.05	23231.8	16067.1	15216.8	22682.6	17288.4	13733.8	29612.8	24426.2	22640	22948.1	21851.9	13090.8	27284.2	20704.3	Peak Found	Peak Found	Peak Found	Not Found	Peak Found	Peak Found	Peak Found	Peak Found	Peak Found	Peak Found	Peak Found
High	P07996	Thrombospondin-1 OS=Homo sapiens OX=9606 GN=THBS1 PE=1 SV=2	2	2	24	2	1170	129.3	4.94	27.85	cell adhesion;cell organization and biogenesis;protein metabolism;other metabolic processes;stress response;transport;developmental processes;other biological processes	non-structural extracellular;extracellular matrix;plasma membrane;other membranes;cytosol;ER/Golgi;other cell component	signal transduction activity or receptor binding;other molecular function	Pf00090, Pf00093, Pf02412, Pf05735	7057	THBS1	A8K6H4; B4E3J7; B9EGH6; hsa:7057; P07996; Q15667; Q59E99	ENSG00000137801	Complement system; Bladder cancer; Apoptosis-related network due to altered Notch3 in ovarian cancer; miRNA targets in ECM and membrane receptors; Focal adhesion; TGF-beta signaling pathway; Focal adhesion: PI3K-Akt-mTOR-signaling pathway; PI3K-Akt signaling pathway; Inflammatory response pathway; Male infertility; TGF-beta receptor signaling in skeletal dysplasias; p53 transcriptional gene netwo…	Integrin cell surface interactions; RUNX1 regulates genes involved in megakaryocyte differentiation and platelet function; Signaling by PDGF; Platelet degranulation ; Defective B3GALTL causes PpS; O-glycosylation of TSR domain-containing proteins; Syndecan interactions	13179.3	18708.8	23575.7	15827.1	23594.5	17020.5	14624.7	16834.9	24359.6	19194.6	22931.7	40300.6	23949.5	24876.8	21448.5	27165.4	30349.3	24855.2	Peak Found	High	Peak Found	High	High	High	Peak Found	High	High	High	High
High	Q9UNN8	Endothelial protein C receptor OS=Homo sapiens OX=9606 GN=PROCR PE=1 SV=1	6	1	2	1	238	26.7	7.18	4.09	stress response;other biological processes	non-structural extracellular;plasma membrane;other membranes;cytoskeleton;other cell component	other molecular function	Pf16497	10544	PROCR	B2RC04; hsa:10544; Q14218; Q6IB56; Q96CB3; Q9ULX1; Q9UNN8	ENSG00000101000		Cell surface interactions at the vascular wall; Common Pathway of Fibrin Clot Formation	9005.17	6459.06	7493.48	6302.45	1871.95	8925.81	6189.9	15364.6	3731.72	11994	6281.46	10793.9	6985.17	8765.27	9036	4765.07	10999.4	9702.03	Peak Found	Peak Found	Peak Found	Peak Found	Not Found	Peak Found	Peak Found	Peak Found	Peak Found	Peak Found	Peak Found
High	P39900	Macrophage metalloelastase OS=Homo sapiens OX=9606 GN=MMP12 PE=1 SV=1	3	1	4	1	470	54	8.66	7.9	cell organization and biogenesis;protein metabolism;other metabolic processes;stress response;transport;developmental processes;other biological processes	non-structural extracellular;extracellular matrix;nucleus;other cell component	nucleic acid binding activity;other molecular function	Pf00045, Pf00413, Pf01471	4321	MMP12	B2R9X8; B7ZLF6; hsa:4321; P39900; Q2M1L9	ENSG00000262406	Matrix metalloproteinases; Spinal cord injury; TGF-beta signaling pathway	Collagen degradation	2798.15	2685.05	3688.57	3851.38	2885.32	1553.8	3400.44	3789.5	3269.87	8415.89	1770.19	2418.68	9090.59	2974.74	4011.65	6822	2098.32	3742.42	Not Found	Not Found	Not Found	Not Found	Not Found	Not Found	Not Found	Not Found	Not Found	High	Peak Found
High	P47895	Aldehyde dehydrogenase family 1 member A3 OS=Homo sapiens OX=9606 GN=ALDH1A3 PE=1 SV=2	3	2	6	2	512	56.1	7.25	4.15	cell organization and biogenesis;other metabolic processes;developmental processes;other biological processes	cytosol;other cell component	other molecular function	Pf00171	220	ALDH1A3	hsa:220; P47895; Q6NT64	ENSG00000184254	Ethanol effects on histone modifications; Vitamin A and carotenoid metabolism	RA biosynthesis pathway	3853.72	3584.91	4027.2	4028.97	3298.54	1747.87	6644.11	3364.66	2123.02	3915.71	6276.7	7617.31	7141.73	4550.65	4550.84	2694.33	4497.22	10407	High	Not Found	Peak Found	Peak Found	Peak Found	Peak Found	Peak Found	Peak Found	Not Found	High	High
High	P20908	Collagen alpha-1(V) chain OS=Homo sapiens OX=9606 GN=COL5A1 PE=1 SV=3	1	1	2	1	1838	183.4	5.06	1.62	cell adhesion;cell organization and biogenesis;other metabolic processes;stress response;developmental processes;other biological processes	non-structural extracellular;extracellular matrix;ER/Golgi	signal transduction activity or receptor binding;extracellular structural activity;other molecular function	Pf01391, Pf01410	1289	COL5A1	A0A087WXW9; hsa:1289; P20908; Q15094; Q5SUX4	ENSG00000130635	Allograft rejection; miRNA targets in ECM and membrane receptors; Focal adhesion: PI3K-Akt-mTOR-signaling pathway; miR-509-3p alteration of YAP1/ECM axis	Integrin cell surface interactions; ECM proteoglycans; NCAM1 interactions; MET activates PTK2 signaling; Collagen degradation; Signaling by PDGF; Assembly of collagen fibrils and other multimeric structures; Collagen chain trimerization; Syndecan interactions	2483.19	1743.31	3286.33	2844.88	2570.55	2692.54	3785.8	3045.27	2035.47	3699.01	3146.63	3877.24	3707.8	3842.99	3570.94	5964.15	2103.97	1894.88	Not Found	Not Found	Not Found	Not Found	Not Found	Not Found	High	Not Found	Not Found	Peak Found	Not Found
High	O00391	Sulfhydryl oxidase 1 OS=Homo sapiens OX=9606 GN=QSOX1 PE=1 SV=3	5	2	14	2	747	82.5	8.92	21.29	cell organization and biogenesis;other biological processes	non-structural extracellular;other membranes;ER/Golgi;other cell component	other molecular function	Pf00085, Pf04777, Pf18108, Pf18371	5768	QSOX1	hsa:5768; O00391; Q59G29; Q5T2X0; Q8TDL6; Q8WVP4	ENSG00000116260		Neutrophil degranulation; Platelet degranulation ; Regulation of Insulin-like Growth Factor (IGF) transport and uptake by Insulin-like Growth Factor Binding Proteins (IGFBPs); Post-translational protein phosphorylation	10214.2	14168.3	12213.9	8987.56	11624	12264.3	18612.6	14741.1	9435.45	17551.6	9664.7	9471.78	18288.1	14081	15881.8	23616.3	9347.37	9242.73	Peak Found	Peak Found	High	Peak Found	Peak Found	Peak Found	High	Peak Found	High	High	High
High	P27487	Dipeptidyl peptidase 4 OS=Homo sapiens OX=9606 GN=DPP4 PE=1 SV=2	2	2	4	2	766	88.2	6.04	8.63	cell adhesion;cell organization and biogenesis;protein metabolism;other metabolic processes;stress response;transport;signal transduction;other biological processes	non-structural extracellular;plasma membrane;other membranes;other cell component	signal transduction activity or receptor binding;other molecular function	Pf00326, Pf00930	1803	DPP4	hsa:1803; P27487; Q53TN1	ENSG00000197635	Ferroptosis	Synthesis, secretion, and inactivation of Glucagon-like Peptide-1 (GLP-1); Synthesis, secretion, and inactivation of Glucose-dependent Insulinotropic Polypeptide (GIP)	18627.4	4704.56	6227.21	7193.79	6010.52	6520.8	5393.31	5394.63	5149.56	6334.53	6761.07	6083.07	10446.2	7800.54	8841.77	10105.8	7325.17	15739.2	Peak Found	Not Found	Not Found	Peak Found	Not Found	Not Found	Not Found	Peak Found	Not Found	High	Peak Found
High	Q96CN9	GRIP and coiled-coil domain-containing protein 1 OS=Homo sapiens OX=9606 GN=GCC1 PE=1 SV=1	1	1	1	1	775	87.8	5.45	0		other membranes;cytosol;ER/Golgi	other molecular function	Pf01465	79571	GCC1	hsa:79571; Q96CN9; Q9H6N7	ENSG00000179562	Nuclear receptors meta-pathway	Retrograde transport at the Trans-Golgi-Network	2961.93	3844.57	2860.22	1978.26	3136.78	1974.53	4109.2	2672.82	2993.08	2137.91	5551.32	1594.05	2668.49	2700.12	2117.54	2140.91	4013.46	3259.72	Not Found	Not Found	Not Found	Not Found	Not Found	Not Found	Not Found	Not Found	Not Found	Not Found	High
High	Q08380	Galectin-3-binding protein OS=Homo sapiens OX=9606 GN=LGALS3BP PE=1 SV=1	2	1	1	1	585	65.3	5.27	1.81	cell adhesion;stress response;transport;signal transduction	non-structural extracellular;other membranes;other cell component	other molecular function	Pf00530, Pf07707	3959	LGALS3BP	hsa:3959; Q08380; Q7M4S0; Q9UCH8; Q9UCH9; Q9UCI0	ENSG00000108679	Network map of SARS-CoV-2 signaling pathway	Platelet degranulation	11796.2	15707.9	15078.1	5812.74	10506.7	11967.1	9421.9	9377.97	15278.5	7024.69	10197.9	17932.7	16647.2	13895.9	14103	8714.64	16120.6	14827	Peak Found	Peak Found	Peak Found	Peak Found	Peak Found	Peak Found	Peak Found	Peak Found	Peak Found	Peak Found	Peak Found
High	Q13740	CD166 antigen OS=Homo sapiens OX=9606 GN=ALCAM PE=1 SV=2	14	6	65	6	583	65.1	6.25	150.03	cell adhesion;cell organization and biogenesis;developmental processes;signal transduction;other biological processes	plasma membrane;other membranes;other cell component	signal transduction activity or receptor binding;other molecular function	Pf08205, Pf13927	214	ALCAM	B2RNS3; B4DTU0; hsa:214; O60892; Q13740; Q1HGM8; Q1HGM9; Q6PEY4; Q6ZS95	ENSG00000170017		L1CAM interactions	206245	232421	210927	405465	259755	242060	257793	321789	248867	403838	247308	260011	408274	323684	348500	285757	460825	282090	High	High	High	High	High	High	High	High	High	High	High
High	P20645	Cation-dependent mannose-6-phosphate receptor OS=Homo sapiens OX=9606 GN=M6PR PE=1 SV=1	3	1	3	1	277	31	5.83	3.42	transport	plasma membrane;other membranes;ER/Golgi;other cytoplasmic organelle;other cell component	other molecular function	Pf02157	4074	M6PR	A8K528; D3DUV5; hsa:4074; P20645	ENSG00000003056		Cargo recognition for clathrin-mediated endocytosis; Lysosome Vesicle Biogenesis; Retrograde transport at the Trans-Golgi-Network	4719.63	4514.18	9886.32	6969.61	11534.3	3133.58	5239.81	7046.62	8568.5	8125.87	5828.07	9278.53	9334.65	11074.7	6564.58	9907.75	10806.2	6469.49	Peak Found	Peak Found	Peak Found	High	Peak Found	High	Peak Found	Peak Found	Peak Found	Peak Found	Peak Found
High	Q9NYV4	Cyclin-dependent kinase 12 OS=Homo sapiens OX=9606 GN=CDK12 PE=1 SV=2	1	1	1	1	1490	164.1	9.44	0	protein metabolism;RNA metabolism OR transcription;other metabolic processes;other biological processes	nucleus;other cell component	kinase activity;other molecular function	Pf00069	51755	CDK12	A7E2B2; B4DYX4; B9EIQ6; hsa:51755; O94978; Q9NYV4	ENSG00000167258		TP53 Regulates Transcription of DNA Repair Genes	3634.12	6936.28	8541.19	3755.04	13209.9	3418.15	9293.87	7566.75	10060.8	2851.31	11798.8	6168.56	4328.83	5023.29	5290.68	4869.27	4979.12	4595.21	Not Found	Peak Found	Peak Found	Not Found	Peak Found	Not Found	Peak Found	Peak Found	High	Not Found	Peak Found
High	P78310	Coxsackievirus and adenovirus receptor OS=Homo sapiens OX=9606 GN=CXADR PE=1 SV=1	3	1	16	1	365	40	7.56	21.51	cell adhesion;cell organization and biogenesis;stress response;transport;developmental processes;other biological processes	non-structural extracellular;plasma membrane;other membranes;nucleus;other cell component	signal transduction activity or receptor binding;other molecular function	Pf00047, Pf07686	1525	CXADR	B2R8V8; B7WPI3; D3YHP0; hsa:1525; O00694; P78310; Q8WWT6; Q8WWT7; Q8WWT8; Q9UKV4	ENSG00000154639	Acute viral myocarditis	Immunoregulatory interactions between a Lymphoid and a non-Lymphoid cell; Cell surface interactions at the vascular wall	12249.4	17711.6	7136.88	12802.8	15405.2	13313	9986.47	14585.6	9864.46	11935.3	12682.4	12951.6	19908.2	17765.8	13804.4	11470.4	16766.6	13184.8	High	High	High	High	High	Peak Found	High	High	High	High	Peak Found
High	Q9NT68	Teneurin-2 OS=Homo sapiens OX=9606 GN=TENM2 PE=1 SV=3	2	4	36	3	2774	307.6	6.68	49.09	cell adhesion;cell-cell signaling;cell organization and biogenesis;developmental processes;signal transduction;other biological processes	plasma membrane;other membranes;ER/Golgi;nucleus;other cell component	signal transduction activity or receptor binding;other molecular function	Pf06484, Pf15636	57451	TENM2	hsa:57451; Q9NT68; Q9ULU2	ENSG00000145934			42906.6	33196.5	40231.6	53232.8	46962.1	41251.9	40548	62797	34732.2	55261.5	56299.5	57946.7	51146.4	62575	72845.4	47239.2	87883.3	61543.4	High	Peak Found	High	Peak Found	Peak Found	Peak Found	High	Peak Found	High	High	High
Medium	P19256	Lymphocyte function-associated antigen 3 OS=Homo sapiens OX=9606 GN=CD58 PE=1 SV=1	3	1	2	1	250	28.1	6.76	1.84	cell adhesion;stress response;other biological processes	plasma membrane;other membranes;other cell component	signal transduction activity or receptor binding		965	CD58	A8K7G5; hsa:965; P19256; Q5U053; Q6IB65; Q96KI9	ENSG00000116815		Cell surface interactions at the vascular wall; Neutrophil degranulation	8504.78	10236.9	9399.7	8230.92	10394.7	23512.6	2019.56	11570.1	9125.27	10803.2	11240.9	14143.7	13176.6	17598.6	13778.9	7454.18	13909	15914.9	Peak Found	Peak Found	Peak Found	Peak Found	Peak Found	Peak Found	Not Found	Peak Found	Peak Found	Peak Found	High
High	P62277	40S ribosomal protein S13 OS=Homo sapiens OX=9606 GN=RPS13 PE=1 SV=2	19	3	33	3	151	17.2	10.54	60.94	protein metabolism;other metabolic processes;other biological processes	cytosol;translational apparatus;nucleus;other cell component	nucleic acid binding activity;other molecular function	Pf00312, Pf08069	6207	RPS13	B2R549; hsa:6207; P19116; P62277; Q02546; Q29200; Q498Y0	ENSG00000110700	Cytoplasmic ribosomal proteins	Regulation of expression of SLITs and ROBOs; Nonsense Mediated Decay (NMD) enhanced by the Exon Junction Complex (EJC); L13a-mediated translational silencing of Ceruloplasmin expression; Formation of a pool of free 40S subunits; GTP hydrolysis and joining of the 60S ribosomal subunit; Major pathway of rRNA processing in the nucleolus and cytosol; SRP-dependent cotranslational protein targeting to…	28648.2	19884.9	19774.6	27019.7	7565.96	12654.2	50471	23517.2	26296.3	17672.3	16614.1	10017	19778	12600.1	16721	15308.9	15020.2	22320.6	High	High	High	High	Peak Found	High	High	High	High	High	High
High	P35555	Fibrillin-1 OS=Homo sapiens OX=9606 GN=FBN1 PE=1 SV=4	1	2	8	2	2871	312.1	4.93	3.22	cell adhesion;other metabolic processes;developmental processes;signal transduction;other biological processes	non-structural extracellular;extracellular matrix;ER/Golgi	signal transduction activity or receptor binding;extracellular structural activity;other molecular function	Pf00683, Pf07645, Pf12662, Pf12947, Pf14670, Pf18193	2200	FBN1	B2RUU0; D2JYH6; hsa:2200; P35555; Q15972; Q75N87	ENSG00000166147	Hypothesized pathways in pathogenesis of cardiovascular disease; TGF-beta receptor signaling in skeletal dysplasias; 7q11.23 copy number variation syndrome; Progeria-associated lipodystrophy	Integrin cell surface interactions; Degradation of the extracellular matrix; Regulation of Insulin-like Growth Factor (IGF) transport and uptake by Insulin-like Growth Factor Binding Proteins (IGFBPs); Post-translational protein phosphorylation; Molecules associated with elastic fibres; TGF-beta receptor signaling activates SMADs	10815.3	19976.4	12678.3	8551.29	12883.3	6989.47	11063.3	11849.5	24593.5	8345.09	7638.39	14125.9	10696.5	25594.7	11258.3	17666.6	9701.37	15904	High	Peak Found	High	Peak Found	Peak Found	High	Peak Found	High	Peak Found	Peak Found	High
High	O00154	Cytosolic acyl coenzyme A thioester hydrolase OS=Homo sapiens OX=9606 GN=ACOT7 PE=1 SV=3	2	1	1	1	380	41.8	8.54	2	other metabolic processes	cytosol;mitochondrion;nucleus	other molecular function	Pf03061	11332	ACOT7	A8K0K7; A8K232; A8K6B8; A8K837; B3KQ12; hsa:11332; O00154; O43703; Q53Y78; Q5JYL2; Q5JYL3; Q5JYL4; Q5JYL5; Q5JYL6; Q5TGR4; Q9UJM9; Q9Y539; Q9Y540	ENSG00000097021		Mitochondrial Fatty Acid Beta-Oxidation	2527.31	10231.5	7793.85	2773.64	9384.04	3970.13	9870.82	6505.02	5020.56	4977.04	2425.95	3306.39	1999.39	5221.63	7227.79	2579.62	5574.45	9292.41	Not Found	Peak Found	Peak Found	Not Found	Peak Found	Not Found	Peak Found	Peak Found	Peak Found	Peak Found	Peak Found
High	P15121	Aldo-keto reductase family 1 member B1 OS=Homo sapiens OX=9606 GN=AKR1B1 PE=1 SV=3	7	2	7	2	316	35.8	6.98	12.42	other metabolic processes;stress response;developmental processes;other biological processes	non-structural extracellular;cytosol;nucleus	other molecular function	Pf00248	231	AKR1B1	B2R8N3; hsa:231; P15121; Q5U031; Q6FGA4; Q6ICP2; Q9BS21; Q9UCI9	ENSG00000085662	Eicosanoid metabolism via cyclooxygenases (COX); Disorders of galactose metabolism ; Polyol pathway; Metapathway biotransformation Phase I and II	Pregnenolone biosynthesis; Fructose biosynthesis	5772.02	1513.94	5981.35	4107.16	4338.81	2385.53	3501.94	5293.19	3567.98	3640.86	4152.55	5584.55	3011.16	6152.19	5260.87	1687.57	6588.22	5822.6	High	Peak Found	Peak Found	High	Peak Found	Not Found	High	High	Peak Found	High	Peak Found
High	Q12792	Twinfilin-1 OS=Homo sapiens OX=9606 GN=TWF1 PE=1 SV=3	8	2	37	2	350	40.3	6.96	67.73	cell organization and biogenesis;other biological processes	plasma membrane;other membranes;cytosol;cytoskeleton;other cell component	cytoskeletal activity;other molecular function	Pf00241	5756	TWF1	A8K5A8; B3KXS6; B4DLX9; hsa:5756; Q12792; Q59G07; Q5U0B1; Q6FHJ1; Q6FHL6; Q6NUK9; Q86XL6; Q8TCD3	ENSG00000151239		RHOBTB2 GTPase cycle; Sensory processing of sound by inner hair cells of the cochlea; Sensory processing of sound by outer hair cells of the cochlea	2913.9	2606.24	2030.04	3130.56	3057.25	3120.64	8874.46	1831.86	2181.37	4240.37	2155.59	1518.88	10171	3991.75	1509.99	4462.18	2444.15	3838.84	High	High	High	High	High	High	High	High	High	High	High
High	Q9GZP4	PITH domain-containing protein 1 OS=Homo sapiens OX=9606 GN=PITHD1 PE=1 SV=1	9	1	2	1	211	24.2	5.74	2.41	other biological processes	other cell component		Pf06201	57095	PITHD1	B2R7J4; hsa:57095; Q5QPN6; Q5QPN7; Q9GZP4; Q9NRI8	ENSG00000057757			17747.5	5320.47	9270.52	12653.9	4748.42	4188.04	18422.4	7122.62	6914.56	7345.34	7332.43	6723.9	6011.14	5851.57	6164.45	5795.03	5887.5	6904.65	Peak Found	Not Found	Peak Found	Peak Found	Not Found	Not Found	High	Not Found	Peak Found	Not Found	Not Found
High	P02765	Alpha-2-HS-glycoprotein OS=Homo sapiens OX=9606 GN=AHSG PE=1 SV=2	4	1	6	1	367	39.3	5.72	13.59	stress response;transport;developmental processes;other biological processes	extracellular matrix;ER/Golgi;other cell component	enzyme regulator activity	Pf00031	197	AHSG	A8K9N6; B2R7G1; hsa:197; O14961; O14962; P02765; Q9P152	ENSG00000145192		Neutrophil degranulation; Regulation of Insulin-like Growth Factor (IGF) transport and uptake by Insulin-like Growth Factor Binding Proteins (IGFBPs); Post-translational protein phosphorylation; Platelet degranulation	2133.59	3287.57	3140.85	4741.74	3756.49	1584.44	5261.75	1627.95	1885.5	6736.08	1921.74	2474.35	6868.6	3390.82	4751	4732.92	2558.92	7838.18	Not Found	Not Found	Not Found	Peak Found	Not Found	Not Found	Peak Found	Not Found	Not Found	High	Peak Found
High	P35556	Fibrillin-2 OS=Homo sapiens OX=9606 GN=FBN2 PE=1 SV=3	0	1	5	1	2912	314.6	4.86	1.64	developmental processes;signal transduction;other biological processes	non-structural extracellular;extracellular matrix	signal transduction activity or receptor binding;extracellular structural activity;other molecular function	Pf00683, Pf07645, Pf12661, Pf12662, Pf12947, Pf18193	2201	FBN2	B4DU01; hsa:2201; P35556; Q59ES6	ENSG00000138829	Hypothesized pathways in pathogenesis of cardiovascular disease	Degradation of the extracellular matrix; Molecules associated with elastic fibres	1478.99	6511.63	2116.89	5669.81	9012.63	10995.6	2233.85	7567.22	15331.8	3319.32	7604.83	12180.5	6257.19	11778.7	11330.3	4334.82	13443.7	8916.66	Not Found	Peak Found	Not Found	Peak Found	Peak Found	Peak Found	Not Found	High	Peak Found	Not Found	High
High	O15031	Plexin-B2 OS=Homo sapiens OX=9606 GN=PLXNB2 PE=1 SV=3	1	2	9	2	1838	205	6.24	11.46	cell adhesion;cell cycle OR cell proliferation;cell organization and biogenesis;developmental processes;signal transduction;other biological processes	plasma membrane;other membranes;other cell component	other molecular function	Pf01403, Pf01437, Pf01833, Pf08337, Pf17960, Pf20170	23654	PLXNB2	A6QRH0; hsa:23654; O15031; Q7KZU3; Q9BSU7	ENSG00000196576			14536.6	54720.8	16336.3	21557.5	34085.8	28585.1	16197.8	5446.46	18703.2	31638.2	35241.1	34393.7	34895.6	42236.6	34801.7	22692.6	35892.2	34104.5	Peak Found	Peak Found	Peak Found	Peak Found	Peak Found	Peak Found	Peak Found	Not Found	Peak Found	Peak Found	High
High	Q6ZMP0	Thrombospondin type-1 domain-containing protein 4 OS=Homo sapiens OX=9606 GN=THSD4 PE=2 SV=2	1	1	12	1	1018	112.4	7.65	26.87	cell organization and biogenesis	extracellular matrix	other molecular function	Pf00090, Pf05986, Pf08686, Pf19030, Pf19236	79875	THSD4	B2RTY3; B4DR13; hsa:79875; Q6MZI3; Q6UXZ8; Q6ZMP0; Q9H8E4	ENSG00000187720		Defective B3GALTL causes PpS; O-glycosylation of TSR domain-containing proteins	1889.9	3820.86	8119.81	3249.02	10917.6	10838.6	5753.68	7869.3	9162.45	10520.2	9525.97	10622.1	13095	13138.6	14474.3	12628.6	17001.6	17876.4	Not Found	Not Found	Peak Found	Not Found	High	Peak Found	Peak Found	High	High	Peak Found	High
High	P62979	Ubiquitin-40S ribosomal protein S27a OS=Homo sapiens OX=9606 GN=RPS27A PE=1 SV=2	21	3	40	3	156	18	9.64	79.13	protein metabolism;other metabolic processes	plasma membrane;other membranes;cytosol;mitochondrion;ER/Golgi;translational apparatus;nucleus;other cytoplasmic organelle	other molecular function	Pf00240, Pf01599	6233	RPS27A	hsa:6233; P02248; P02249; P02250; P14798; P62979; P62988; Q29120; Q6LBL4; Q6LDU5; Q8WYN8; Q91887; Q91888; Q9BQ77; Q9BWD6; Q9BX98; Q9UEF2; Q9UEG1; Q9UEK8; Q9UPK7	ENSG00000143947	Cytoplasmic ribosomal proteins	FCERI mediated NF-kB activation; Separation of Sister Chromatids; The role of GTSE1 in G2/M progression after G2 checkpoint; Aggrephagy; MAPK6/MAPK4 signaling; Deactivation of the beta-catenin transactivating complex; Downregulation of TGF-beta receptor signaling; Regulation of expression of SLITs and ROBOs; Nonsense Mediated Decay (NMD) enhanced by the Exon Junction Complex (EJC); SMAD2/SMAD3:SM…	95542.6	428833	102158	80300.5	87277.7	76536	114817	80296.7	101013	85572.6	66138.9	104001	81988.1	96586.1	98643.5	77571.2	121665	96278.5	High	High	High	High	High	Peak Found	High	High	High	High	High
High	Q9P273	Teneurin-3 OS=Homo sapiens OX=9606 GN=TENM3 PE=1 SV=3	1	2	13	1	2699	300.8	6.42	9.55	cell adhesion;developmental processes;signal transduction;other biological processes	plasma membrane;other membranes;other cell component	other molecular function	Pf06484, Pf15636	55714	TENM3	hsa:55714; Q5XUL9; Q96SY2; Q9NV77; Q9NVW1; Q9NZJ2; Q9P273	ENSG00000218336			10567.5	10235.5	11988.2	1948.21	20955.1	14082.4	8284.32	13491.1	13658.2	10908.4	17463.8	17244.2	22634.5	16863.1	14506.6	9043.01	27233.7	15130.1	Peak Found	Peak Found	Peak Found	Not Found	Peak Found	Peak Found	Peak Found	High	Peak Found	Peak Found	Peak Found
High	P08195	4F2 cell-surface antigen heavy chain OS=Homo sapiens OX=9606 GN=SLC3A2 PE=1 SV=3	10	5	101	5	630	68	5.01	131.31	other metabolic processes;transport;other biological processes	plasma membrane;other membranes;nucleus;other cytoplasmic organelle;other cell component	transporter activity;nucleic acid binding activity;other molecular function	Pf00128, Pf16028	6520	SLC3A2	hsa:6520; P08195; Q13543	ENSG00000168003	mRNA, protein, and metabolite inducation pathway by cyclosporin A; Ferroptosis; Proximal tubule transport; Malignant pleural mesothelioma	Basigin interactions; Tryptophan catabolism; Amino acid transport across the plasma membrane; Defective SLC7A7 causes lysinuric protein intolerance (LPI)	111439	90222.2	102522	125268	85557	145671	111587	86412.8	102180	160220	168213	180232	178635	128916	149790	181346	163424	152762	High	High	High	High	High	High	High	High	High	High	High
High	O00592	Podocalyxin OS=Homo sapiens OX=9606 GN=PODXL PE=1 SV=2	7	5	151	5	558	58.6	5.49	305.29	cell adhesion;developmental processes;other biological processes	non-structural extracellular;plasma membrane;other membranes;cytoskeleton;nucleus;other cell component		Pf06365	5420	PODXL	A6NHX8; hsa:5420; O00592; Q52LZ7; Q53ER6	ENSG00000128567	Primary focal segmental glomerulosclerosis (FSGS); Ectoderm differentiation; Hepatitis C and hepatocellular carcinoma; Nephrotic syndrome; Malignant pleural mesothelioma		851577	477364	530911	566684	692499	554978	449271	469202	552088	529456	657927	733809	648325	666323	723177	450153	612476	791151	High	High	High	High	High	High	High	High	High	High	High
High	P68402	Platelet-activating factor acetylhydrolase IB subunit alpha2 OS=Homo sapiens OX=9606 GN=PAFAH1B2 PE=1 SV=1	5	1	2	1	229	25.6	5.92	4.35	other metabolic processes;developmental processes;other biological processes	non-structural extracellular;plasma membrane;other membranes;cytosol;nucleus;other cell component	other molecular function	Pf13472	5049	PAFAH1B2	A8DPS5; A8DPS6; A8DPS7; E9PEJ5; E9PLP3; hsa:5049; O00687; P68402; Q29459; Q6IBR6	ENSG00000168092		COPI-independent Golgi-to-ER retrograde traffic; Neutrophil degranulation	1613.64	3070.83	2447.13	3833.5	1704.8	3982.69	4079.94	3798.51	2297	2134.38	4060.2	5340.13	4463.88	4583.45	4361.18	2968.52	3638.58	10790.1	Not Found	Not Found	Not Found	Not Found	Not Found	Not Found	Not Found	Not Found	Not Found	Not Found	Peak Found
High	P21333	Filamin-A OS=Homo sapiens OX=9606 GN=FLNA PE=1 SV=4	2	5	64	4	2647	280.6	6.06	166.48	cell cycle OR cell proliferation;cell organization and biogenesis;protein metabolism;other metabolic processes;stress response;transport;developmental processes;signal transduction;other biological processes	non-structural extracellular;plasma membrane;other membranes;cytosol;cytoskeleton;ER/Golgi;nucleus;other cell component	signal transduction activity or receptor binding;cytoskeletal activity;other molecular function	Pf00307, Pf00630	2316	FLNA	E9KL45; hsa:2316; P21333; Q5HY53; Q5HY55; Q8NF52	ENSG00000196924	Androgen receptor signaling pathway; Prolactin signaling pathway; Focal adhesion; Hypothesized pathways in pathogenesis of cardiovascular disease; MAPK signaling pathway; IL-4 signaling pathway; Ebola virus infection in host; Joubert syndrome	RHO GTPases activate PAKs; Platelet degranulation ; OAS antiviral response; GP1b-IX-V activation signalling; Cell-extracellular matrix interactions	109974	64773.7	79986.6	99999.6	35821.2	43415.1	90857	58054.1	86400.4	60076	46636	31481.1	50296.2	34841.8	71567.2	54351.5	22380.3	119631	High	High	High	High	High	High	High	High	High	High	High
High	Q13641	Trophoblast glycoprotein OS=Homo sapiens OX=9606 GN=TPBG PE=1 SV=1	2	1	8	1	420	46	6.83	0	cell adhesion;cell-cell signaling;cell organization and biogenesis;developmental processes;other biological processes	plasma membrane;other membranes;ER/Golgi;other cell component		Pf01462, Pf01463, Pf13855	7162	TPBG	A8K555; hsa:7162; Q13641	ENSG00000146242; ENSG00000283085			20236.2	26643.8	35615.5	31915.1	26444.8	22355.9	19397.3	28445.9	25343.4	26936.3	24474.7	28246	29537	30068.7	33685.2	24885.3	36703.8	41669.9	Peak Found	Peak Found	Peak Found	Peak Found	High	Peak Found	Peak Found	Peak Found	High	High	Peak Found
High	P06733	Alpha-enolase OS=Homo sapiens OX=9606 GN=ENO1 PE=1 SV=2	33	14	183	14	434	47.1	7.39	293.82	other metabolic processes;other biological processes	plasma membrane;other membranes;cytosol;cytoskeleton;nucleus;other cell component	nucleic acid binding activity;other molecular function	Pf00113, Pf03952	2023	ENO1	B2RD59; hsa:2023; P06733; P22712; Q16704; Q4TUS4; Q53FT9; Q53HR3; Q658M5; Q6GMP2; Q71V37; Q7Z3V6; Q8WU71; Q96GV1; Q9BT62; Q9UCH6; Q9UM55	ENSG00000074800	Clear cell renal cell carcinoma pathways; Metabolic reprogramming in colon cancer; Aerobic glycolysis; IL-18 signaling pathway; Glycolysis and gluconeogenesis	Glycolysis; Gluconeogenesis; Manipulation of host energy metabolism	386050	317276	359507	294845	353787	299047	305139	310885	322015	346383	360583	398428	303056	443960	336334	254689	378477	329278	High	High	High	High	High	High	High	High	High	High	High
High	O00622	CCN family member 1 OS=Homo sapiens OX=9606 GN=CCN1 PE=1 SV=1	27	9	214	9	381	42	8.21	417.93	cell adhesion;cell organization and biogenesis;other metabolic processes;stress response;developmental processes;signal transduction;other biological processes	non-structural extracellular;extracellular matrix;ER/Golgi	signal transduction activity or receptor binding;other molecular function	Pf00007, Pf00093, Pf00219, Pf19035	3491	CCN1	hsa:3491; O00622; O14934; O43775; Q9BZL7	ENSG00000142871	Oncostatin M signaling pathway; VEGFA-VEGFR2 signaling pathway; Hypertrophy model	Regulation of Insulin-like Growth Factor (IGF) transport and uptake by Insulin-like Growth Factor Binding Proteins (IGFBPs); Post-translational protein phosphorylation	965190	1.14074e+06	1.1592e+06	1.04464e+06	1.25485e+06	1.30388e+06	986793	917528	1.08814e+06	949013	986755	1.77587e+06	1.90076e+06	1.40515e+06	1.39653e+06	912765	1.27999e+06	1.12734e+06	High	High	High	High	High	High	High	High	High	High	High
High	P61769	Beta-2-microglobulin OS=Homo sapiens OX=9606 GN=B2M PE=1 SV=1	11	1	53	1	119	13.7	6.52	119.12	cell organization and biogenesis;protein metabolism;other metabolic processes;stress response;transport;developmental processes;other biological processes	non-structural extracellular;plasma membrane;other membranes;cytosol;ER/Golgi;other cytoplasmic organelle;other cell component	other molecular function	Pf07654	567	B2M	hsa:567; P01884; P61769; Q540F8; Q6IAT8; Q9UCK0; Q9UD48; Q9UDF4	ENSG00000166710; ENSG00000273686	IL-18 signaling pathway	Immunoregulatory interactions between a Lymphoid and a non-Lymphoid cell; Neutrophil degranulation; Amyloid fiber formation; ER-Phagosome pathway; SARS-CoV-2 activates/modulates innate and adaptive immune responses; Interferon gamma signaling; Antigen Presentation: Folding, assembly and peptide loading of class I MHC; Endosomal/Vacuolar pathway; Modulation by Mtb of host immune system; DAP12 sign…	153946	211613	193608	352332	205666	235447	115660	253243	200032	177535	265615	263380	198330	275650	260243	135267	237300	289880	High	High	High	High	High	High	High	High	High	High	High
High	P15529	Membrane cofactor protein OS=Homo sapiens OX=9606 GN=CD46 PE=1 SV=3	2	1	20	1	392	43.7	6.74	34.91	stress response;other biological processes	plasma membrane;other membranes;other cell component	other molecular function	Pf00084	4179	CD46	A0T1T0; A0T1T1; A0T1T2; hsa:4179; P15529; Q15429; Q53GV9; Q5HY94; Q5VWS6; Q5VWS7; Q5VWS8; Q5VWS9; Q5VWT0; Q5VWT1; Q5VWT2; Q6N0A1; Q7Z3R5; Q9NNW2; Q9NNW3; Q9NNW4; Q9UCJ4	ENSG00000117335	Complement system; Measles virus infection; Complement system in neuronal development and plasticity; Complement and coagulation cascades	Regulation of Complement cascade	78559.3	40651.6	37011.3	59401.6	60790.9	55204.4	36803.7	49905	36891.3	50962.3	42425.6	60061	65602.5	77502.2	64867.7	51202.6	40904.5	71327.6	High	High	Peak Found	High	High	Peak Found	Peak Found	High	High	High	High
High	P07737	Profilin-1 OS=Homo sapiens OX=9606 GN=PFN1 PE=1 SV=2	19	3	15	3	140	15	8.27	24.65	cell organization and biogenesis;developmental processes;other biological processes	cytosol;cytoskeleton;nucleus;other cell component	cytoskeletal activity;other molecular function	Pf00235	5216	PFN1	hsa:5216; P07737; Q53Y44	ENSG00000108518	Physico-chemical features and toxicity-associated pathways; VEGFA-VEGFR2 signaling pathway; Burn wound healing; Regulation of actin cytoskeleton; G13 signaling pathway	RHO GTPases Activate Formins; Platelet degranulation ; PCP/CE pathway; Signaling by ROBO receptors	4046.33	8763.03	14179	8924.3	11014.2	9799.22	5756.89	10683.9	12857.4	14979.1	11506.1	16404.1	10806.5	15091.3	9882.49	7451.92	15561.6	10263.2	Not Found	Peak Found	High	Peak Found	Peak Found	Peak Found	Not Found	High	High	High	High
High	P30101	Protein disulfide-isomerase A3 OS=Homo sapiens OX=9606 GN=PDIA3 PE=1 SV=4	6	3	32	3	505	56.7	6.35	47.23	cell organization and biogenesis;stress response;other biological processes	non-structural extracellular;other membranes;ER/Golgi;other cytoplasmic organelle;other cell component	other molecular function	Pf00085, Pf13848	2923	PDIA3	hsa:2923; P30101; Q13453; Q14255; Q8IYF8; Q9UMU7	ENSG00000167004	Prion disease pathway	ER-Phagosome pathway; Antigen Presentation: Folding, assembly and peptide loading of class I MHC; Calnexin/calreticulin cycle	28857.1	33478.6	40897.9	32620.3	41907.5	29605	32265.9	33505.7	37102.8	22386.9	32521.6	37622.8	35720.9	46891.5	30434.9	28224.9	35733.5	29289.7	High	High	High	High	High	High	High	High	High	High	High
High	P16144	Integrin beta-4 OS=Homo sapiens OX=9606 GN=ITGB4 PE=1 SV=5	1	1	4	1	1822	202	6.09	7.79	cell adhesion;cell organization and biogenesis;other metabolic processes;stress response;developmental processes;signal transduction;other biological processes	extracellular matrix;plasma membrane;other membranes;nucleus;other cell component	signal transduction activity or receptor binding	Pf00041, Pf00362, Pf03160, Pf07965, Pf07974, Pf17205, Pf18372	3691	ITGB4	A0AVL6; hsa:3691; O14690; O14691; O15339; O15340; O15341; P16144; Q0VF97; Q9UIQ4	ENSG00000132470	Integrin-mediated cell adhesion; Focal adhesion; Arrhythmogenic right ventricular cardiomyopathy; Alpha 6 beta 4 signaling pathway; Primary focal segmental glomerulosclerosis (FSGS); Focal adhesion; TGF-beta signaling pathway; Regulation of apoptosis by parathyroid hormone-related protein; Focal adhesion: PI3K-Akt-mTOR-signaling pathway; PI3K-Akt signaling pathway; Mechanoregulation and pathology…	Syndecan interactions; Laminin interactions; Type I hemidesmosome assembly; Assembly of collagen fibrils and other multimeric structures	3340.52	1459.5	3802.86	3627.46	1764.15	3997.59	3012.85	3440.42	1425.69	3990.91	3364.01	2330.4	3931.93	1705.58	4608.89	7088.88	5058.14	4925.75	Not Found	Not Found	Not Found	Not Found	Not Found	Not Found	Not Found	Peak Found	Not Found	High	Peak Found
High	P02786	Transferrin receptor protein 1 OS=Homo sapiens OX=9606 GN=TFRC PE=1 SV=2	10	6	49	6	760	84.8	6.61	92.89	stress response;transport;developmental processes;signal transduction;other biological processes	non-structural extracellular;plasma membrane;other membranes;mitochondrion;nucleus;other cytoplasmic organelle;other cell component	nucleic acid binding activity;other molecular function	Pf02225, Pf04253, Pf04389	7037	TFRC	D3DXB0; hsa:7037; P02786; Q1HE24; Q59G55; Q9UCN0; Q9UCU5; Q9UDF9; Q9UK21	ENSG00000072274	Iron metabolism in placenta; Ferroptosis; 3q29 copy number variation syndrome	RHOA GTPase cycle; RHOG GTPase cycle; RAC2 GTPase cycle; RAC3 GTPase cycle; RHOC GTPase cycle; RND2 GTPase cycle; CDC42 GTPase cycle; RAC1 GTPase cycle; RHOQ GTPase cycle; RHOB GTPase cycle; RHOJ GTPase cycle; Golgi Associated Vesicle Biogenesis; RND1 GTPase cycle; Cargo recognition for clathrin-mediated endocytosis; Transferrin endocytosis and recycling; RHOH GTPase cycle	117317	79635.3	101666	162098	115159	88667.3	66213.8	98858.7	126623	109045	78536.6	144828	119001	227743	122352	101219	146278	139573	High	High	High	High	High	High	High	High	High	High	High
High	P0DMV9	Heat shock 70 kDa protein 1B OS=Homo sapiens OX=9606 GN=HSPA1B PE=1 SV=1	12	7	108	6	641	70	5.66	211.12	RNA metabolism OR transcription;other metabolic processes;stress response;transport;other biological processes	non-structural extracellular;plasma membrane;other membranes;cytosol;cytoskeleton;mitochondrion;ER/Golgi;nucleus;other cell component	signal transduction activity or receptor binding;other molecular function	Pf00012	3303; 3304	HSPA1B	B4E3B6; hsa:3303; hsa:3304; P08107; P0DMV9; P19790; Q5JQI4; Q5SP17; Q9UQL9; Q9UQM0	ENSG00000204388; ENSG00000212866; ENSG00000224501; ENSG00000231555; ENSG00000232804	Apoptosis modulation and signaling; Parkin-ubiquitin proteasomal system pathway; MAPK signaling pathway; Apoptosis modulation by HSP70; VEGFA-VEGFR2 signaling pathway; Measles virus infection	Neutrophil degranulation; HSP90 chaperone cycle for steroid hormone receptors (SHR) in the presence of ligand; Regulation of HSF1-mediated heat shock response; Attenuation phase	243418	158596	154000	146315	104331	81528.1	151743	182797	182597	101618	88879.4	90629.9	88554.2	107830	106985	92419.2	113392	107085	High	High	High	High	High	High	High	High	High	High	High
High	P62937	Peptidyl-prolyl cis-trans isomerase A OS=Homo sapiens OX=9606 GN=PPIA PE=1 SV=2	65	9	119	9	165	18	7.81	232.84	cell adhesion;cell organization and biogenesis;protein metabolism;other metabolic processes;stress response;other biological processes	non-structural extracellular;nucleus;other cell component	signal transduction activity or receptor binding;other molecular function	Pf00160	5478	PPIA	A8K220; hsa:5478; P05092; P62937; Q3KQW3; Q567Q0; Q6IBU5; Q96IX3; Q9BRU4; Q9BTY9; Q9UC61	ENSG00000196262	Prolactin signaling pathway	Neutrophil degranulation; Platelet degranulation ; Gene and protein expression by JAK-STAT signaling after Interleukin-12 stimulation; Basigin interactions; Budding and maturation of HIV virion; Assembly Of The HIV Virion; Integration of provirus; APOBEC3G mediated resistance to HIV-1 infection; Calcineurin activates NFAT; Binding and entry of HIV virion; Uncoating of the HIV Virion; Minus-strand…	365339	478412	438848	364859	423287	476608	543734	366692	516231	346705	381034	510128	406368	493697	434002	275545	420389	399708	High	High	High	High	High	High	High	High	High	High	High
High	P08069	Insulin-like growth factor 1 receptor OS=Homo sapiens OX=9606 GN=IGF1R PE=1 SV=1	1	1	18	1	1367	154.7	5.8	48.97	cell organization and biogenesis;protein metabolism;other metabolic processes;stress response;transport;developmental processes;signal transduction;other biological processes	plasma membrane;other membranes;nucleus;other cell component	signal transduction activity or receptor binding;transporter activity;kinase activity;other molecular function	Pf00757, Pf01030, Pf07714	3480	IGF1R	B1B5Y2; hsa:3480; P08069; Q14CV2; Q9UCC0	ENSG00000140443	MicroRNAs in cardiomyocyte hypertrophy; Thyroid stimulating hormone (TSH) signaling pathway; Glioblastoma signaling pathways; Apoptosis; Focal adhesion; MECP2 and associated Rett syndrome; Factors and pathways affecting insulin-like growth factor (IGF1)-Akt signaling; Focal adhesion: PI3K-Akt-mTOR-signaling pathway; PI3K-Akt signaling pathway; Somatroph axis (GH) and its relationship to dietary r…	Extra-nuclear estrogen signaling; IRS-related events triggered by IGF1R; Signaling by Type 1 Insulin-like Growth Factor 1 Receptor (IGF1R); SHC-related events triggered by IGF1R	25752.4	12922.5	15824.2	57049.3	15138	24983	23897.7	14423.8	21430.6	22732.1	29410.8	18532.3	25552.4	22819.9	28622	23650.5	23495.7	27853.5	High	High	High	High	High	High	High	High	High	High	High
High	Q13867	Bleomycin hydrolase OS=Homo sapiens OX=9606 GN=BLMH PE=1 SV=1	3	1	2	1	455	52.5	6.27	0	protein metabolism;other metabolic processes;other biological processes	cytosol;other cell component	other molecular function	Pf03051	642	BLMH	B2R796; hsa:642; Q13867; Q53F86; Q9UER9	ENSG00000108578		Antigen processing: Ubiquitination & Proteasome degradation	6875.77	3795.98	2498.45	4170.98	3002.19	3311.44	8524.59	3745.39	1741.83	4081.39	3382.18	2045.19	3856.39	2609.87	3371.99	3577.43	2420.6	1479.58	High	Not Found	Not Found	Peak Found	Not Found	Not Found	High	Not Found	Not Found	Not Found	Not Found
High	P23528	Cofilin-1 OS=Homo sapiens OX=9606 GN=CFL1 PE=1 SV=3	11	2	19	2	166	18.5	8.09	43.56	cell cycle OR cell proliferation;cell organization and biogenesis;signal transduction;other biological processes	plasma membrane;other membranes;cytosol;cytoskeleton;nucleus;other cell component	cytoskeletal activity	Pf00241	1072	CFL1	B3KUQ1; hsa:1072; P23528; Q53Y87; Q9UCA2	ENSG00000172757	Brain-derived neurotrophic factor (BDNF) signaling pathway; VEGFA-VEGFR2 signaling pathway; EGF/EGFR signaling pathway; Envelope proteins and their potential roles in EDMD physiopathology; 7q11.23 copy number variation syndrome; Neuroinflammation and glutamatergic signaling; CCL18 signaling pathway; Regulation of actin cytoskeleton; G13 signaling pathway	Regulation of actin dynamics for phagocytic cup formation; RHO GTPases Activate ROCKs; EPHB-mediated forward signaling; Sema3A PAK dependent Axon repulsion; Platelet degranulation ; Gene and protein expression by JAK-STAT signaling after Interleukin-12 stimulation	33960	28152.8	28562.4	39855.5	31299.2	13551.4	60660.8	36311.3	31897.3	6345.44	31295.1	43907.8	31704.2	58210.6	27843.8	25444.5	47542.1	49337	Peak Found	High	High	High	High	High	High	High	High	Not Found	High
High	P62899	60S ribosomal protein L31 OS=Homo sapiens OX=9606 GN=RPL31 PE=1 SV=1	18	2	4	2	125	14.5	10.54	1.66	protein metabolism;other metabolic processes	cytosol;translational apparatus;other cell component	other molecular function	Pf01198	6160	RPL31	B7Z4K2; D3DVJ4; hsa:6160; P12947; P62899; Q53SQ5; Q6IRZ0; Q6LBJ6	ENSG00000071082	Cytoplasmic ribosomal proteins	Regulation of expression of SLITs and ROBOs; Nonsense Mediated Decay (NMD) enhanced by the Exon Junction Complex (EJC); L13a-mediated translational silencing of Ceruloplasmin expression; Formation of a pool of free 40S subunits; GTP hydrolysis and joining of the 60S ribosomal subunit; Major pathway of rRNA processing in the nucleolus and cytosol; SRP-dependent cotranslational protein targeting to…	2867.3	11885.7	11594.8	3544.43	10410.1	14920.4	12197.1	25675.7	25037	11688.1	8337.11	12109.6	6580.36	16116.6	10433.3	3666.49	10914.7	9694.3	Peak Found	Peak Found	Peak Found	High	Peak Found	Peak Found	High	Peak Found	Peak Found	Peak Found	Peak Found
High	P78380	Oxidized low-density lipoprotein receptor 1 OS=Homo sapiens OX=9606 GN=OLR1 PE=1 SV=1	3	1	7	1	273	30.9	7.28	11.14	cell adhesion;protein metabolism;other metabolic processes;stress response;transport;other biological processes	non-structural extracellular;plasma membrane;other membranes;nucleus;other cell component	other molecular function	Pf00059, Pf08391	4973	OLR1	A8K7V9; B4DI48; G3V1I4; hsa:4973; P78380; Q2PP00; Q7Z484	ENSG00000173391	PPAR signaling pathway	Cell surface interactions at the vascular wall; Neutrophil degranulation	14273.1	13565.6	13412.1	19288.2	19691.3	21596.2	8031.4	16361.6	13407.3	26470.1	17395.1	21268.6	19164.3	22531.9	19034.3	9814.15	26649.8	19641.7	Peak Found	Peak Found	Peak Found	Peak Found	Peak Found	Peak Found	Peak Found	Peak Found	Peak Found	High	High
High	P61978	Heterogeneous nuclear ribonucleoprotein K OS=Homo sapiens OX=9606 GN=HNRNPK PE=1 SV=1	3	1	14	1	463	50.9	5.54	28.75	RNA metabolism OR transcription;other metabolic processes;signal transduction;other biological processes	cytoskeleton;nucleus;other cell component	nucleic acid binding activity;other molecular function	Pf00013, Pf08067	3190	HNRNPK	hsa:3190; P61978; Q07244; Q15671; Q59F98; Q5T6W4; Q60577; Q6IBN1; Q922Y7; Q96J62	ENSG00000165119	mRNA processing; lncRNA in canonical Wnt signaling and colorectal cancer	mRNA Splicing - Major Pathway; Processing of Capped Intron-Containing Pre-mRNA; HCMV Late Events; SUMOylation of RNA binding proteins	13127.9	18220.2	23522	13655.6	22007.5	16608.9	13983.9	20528.4	24008.7	13293.1	14605.6	11961.3	11115.1	15751.5	24629.1	8232.02	11270.2	15198.6	High	High	High	High	High	Peak Found	High	High	High	High	High
High	P05026	Sodium/potassium-transporting ATPase subunit beta-1 OS=Homo sapiens OX=9606 GN=ATP1B1 PE=1 SV=1	7	2	18	2	303	35	8.53	14.39	cell adhesion;cell organization and biogenesis;other metabolic processes;stress response;transport;signal transduction;other biological processes	plasma membrane;other membranes;cytoskeleton;other cell component	transporter activity;other molecular function	Pf00287	481	ATP1B1	hsa:481; P05026; Q5TGZ3	ENSG00000143153	Proximal tubule transport; Calcium regulation in cardiac cells	Potential therapeutics for SARS; Ion homeostasis; Ion transport by P-type ATPases; Basigin interactions	49767	22740.5	25936.3	40602	25775.6	33066.2	19217.8	26361.7	28488.4	27879.8	23798.9	27931.5	31110.8	36497.2	27371	25704.8	47936	27401.2	High	Peak Found	Peak Found	High	Peak Found	High	High	High	High	High	High
High	Q7L014	Probable ATP-dependent RNA helicase DDX46 OS=Homo sapiens OX=9606 GN=DDX46 PE=1 SV=2	1	1	4	1	1031	117.3	9.29	7.2	RNA metabolism OR transcription;other metabolic processes	other membranes;nucleus	other molecular function	Pf00270, Pf00271	9879	DDX46	hsa:9879; O94894; Q7L014; Q96EI0; Q9Y658	ENSG00000145833		mRNA Splicing - Major Pathway	2480.6	8525.4	10161	4642.23	3080.54	3381.06	4965.84	8736.97	7091.19	2976.92	1982.2	2767.45	3170.1	5691.92	2409.05	3896.15	1570.01	2453.76	Not Found	High	Peak Found	Peak Found	Not Found	Not Found	High	High	High	Not Found	Peak Found
High	P25445	Tumor necrosis factor receptor superfamily member 6 OS=Homo sapiens OX=9606 GN=FAS PE=1 SV=1	4	2	8	2	335	37.7	7.94	12.72	cell organization and biogenesis;stress response;signal transduction;other biological processes	plasma membrane;other membranes;cytosol;nucleus;other cell component	other molecular function	Pf00020, Pf00531	355	FAS	A9UJX4; B6VNV4; hsa:355; P25445; Q14292; Q14293; Q14294; Q14295; Q16652; Q5T9P1; Q5T9P2; Q5T9P3; Q6SSE9	ENSG00000026103	miRNA regulation of DNA damage response; Alzheimer's disease and miRNA effects; Allograft rejection; Adipogenesis; Nanomaterial induced apoptosis; Apoptosis; Fas ligand pathway and stress induction of heat shock proteins; MAPK signaling pathway; Apoptosis modulation by HSP70; VEGFA-VEGFR2 signaling pathway; Nonalcoholic fatty liver disease; Control of immune tolerance by vasoactive intestinal pep…	TP53 Regulates Transcription of Death Receptors and Ligands; Regulation by c-FLIP; RIPK1-mediated regulated necrosis; CASP8 activity is inhibited; Dimerization of procaspase-8; FasL/ CD95L signaling	32905.8	11074	24936.8	21437.3	23217.8	24236.1	15392.8	13188.8	33788.2	15734.5	16056.8	19790.1	21677.2	25614.9	21318.8	15815.8	19439.5	45872.2	Peak Found	Peak Found	Peak Found	Peak Found	Peak Found	Peak Found	Peak Found	Peak Found	Peak Found	Peak Found	High
High	P31948	Stress-induced-phosphoprotein 1 OS=Homo sapiens OX=9606 GN=STIP1 PE=1 SV=1	3	2	5	2	543	62.6	6.8	3.65	other biological processes	cytosol;ER/Golgi;nucleus;other cell component	other molecular function	Pf00515, Pf13181, Pf17830	10963	STIP1	B4DM70; F5H0T1; G3XAD8; hsa:10963; P31948; Q3ZCU9; Q5TZU9	ENSG00000168439	VEGFA-VEGFR2 signaling pathway	RND1 GTPase cycle; HSP90 chaperone cycle for steroid hormone receptors (SHR) in the presence of ligand	7220.9	4627.6	4039.21	6408.59	4581.9	4184.84	5332.68	6918.25	7164.22	4055.95	3778.55	2190.87	4158	4147.27	2726.88	2839.48	1588.52	3792.35	Peak Found	Peak Found	Peak Found	High	Peak Found	Peak Found	Peak Found	High	Peak Found	High	Peak Found
High	P62913	60S ribosomal protein L11 OS=Homo sapiens OX=9606 GN=RPL11 PE=1 SV=2	8	1	2	1	178	20.2	9.6	4.66	cell organization and biogenesis;protein metabolism;RNA metabolism OR transcription;other metabolic processes;transport;other biological processes	cytosol;translational apparatus;nucleus;other cell component	enzyme regulator activity;nucleic acid binding activity;other molecular function	Pf00281, Pf00673	6135	RPL11	hsa:6135; P25121; P39026; P62913; Q8TDH2; Q9Y674	ENSG00000142676	Cytoplasmic ribosomal proteins	Regulation of expression of SLITs and ROBOs; Nonsense Mediated Decay (NMD) enhanced by the Exon Junction Complex (EJC); L13a-mediated translational silencing of Ceruloplasmin expression; Formation of a pool of free 40S subunits; GTP hydrolysis and joining of the 60S ribosomal subunit; Major pathway of rRNA processing in the nucleolus and cytosol; SRP-dependent cotranslational protein targeting to…	2952.14	3018.86	3247.56	8861.71	2175.22	3616.58	31592.6	1735.95	1873.82	4064.1	4166.76	4083.15	3052.36	3258.51	3805.92	3145.94	3472.4	3738.53	Not Found	Not Found	Not Found	Peak Found	Not Found	Not Found	High	Not Found	Not Found	Not Found	Not Found
High	Q99715	Collagen alpha-1(XII) chain OS=Homo sapiens OX=9606 GN=COL12A1 PE=1 SV=2	1	4	16	4	3063	332.9	5.53	22.24	cell adhesion;cell organization and biogenesis;developmental processes	extracellular matrix;ER/Golgi	extracellular structural activity	Pf00041, Pf00092, Pf01391	1303	COL12A1	hsa:1303; O43853; Q15955; Q5VYK1; Q5VYK2; Q71UR3; Q99715; Q99716	ENSG00000111799		Collagen degradation; Assembly of collagen fibrils and other multimeric structures; Collagen chain trimerization	669352	187640	234448	750373	250868	196845	413625	283718	186593	360642	112267	165710	326370	225650	140955	354849	175850	144589	Peak Found	High	Peak Found	Peak Found	Peak Found	Peak Found	High	High	Peak Found	High	High
High	P62826	GTP-binding nuclear protein Ran OS=Homo sapiens OX=9606 GN=RAN PE=1 SV=3	19	3	30	3	216	24.4	7.49	64.98	cell cycle OR cell proliferation;cell organization and biogenesis;DNA metabolism;other metabolic processes;transport;developmental processes;other biological processes	cytosol;cytoskeleton;nucleus;other cytoplasmic organelle;other cell component	other molecular function	Pf00071	5901	RAN	A8K3Z8; hsa:5901; P17080; P28746; P28747; P62826; Q6IPB2; Q86V08; Q8NI90; Q9CSP3; Q9CWI7; Q9CZA2; Q9UDJ5; Q9UEU9	ENSG00000132341	Androgen receptor signaling pathway; miRNA biogenesis; 22q11.2 copy number variation syndrome	Nuclear import of Rev protein; Transcriptional regulation by small RNAs; Rev-mediated nuclear export of HIV RNA; NEP/NS2 Interacts with the Cellular Export Machinery; tRNA processing in the nucleus; Regulation of cholesterol biosynthesis by SREBP (SREBF); MicroRNA (miRNA) biogenesis; Postmitotic nuclear pore complex (NPC) reformation	49352.8	34020.4	29960.2	34470	21139.7	23733.4	42871.5	33700.5	31994.9	18521.3	19025	18169.8	21277.2	23333	18149.5	14685.1	19036.7	17534.4	High	High	High	High	High	High	High	High	High	High	High
High	P06748	Nucleophosmin OS=Homo sapiens OX=9606 GN=NPM1 PE=1 SV=2	14	4	17	4	294	32.6	4.78	22.5	cell cycle OR cell proliferation;cell organization and biogenesis;DNA metabolism;other metabolic processes;stress response;transport;signal transduction;other biological processes	cytosol;cytoskeleton;nucleus;other cell component	enzyme regulator activity;translation activity;nucleic acid binding activity;other molecular function	Pf03066, Pf16276	4869	NPM1	A8K3N7; B5BU00; D3DQL6; hsa:4869; P06748; P08693; Q12826; Q13440; Q13441; Q14115; Q5EU94; Q5EU95; Q5EU96; Q5EU97; Q5EU98; Q5EU99; Q6V962; Q8WTW5; Q96AT6; Q96DC4; Q96EA5; Q9BYG9; Q9UDJ7	ENSG00000181163		ALK mutants bind TKIs; Signaling by ALK fusions and activated point mutants; Nuclear events stimulated by ALK signaling in cancer; TP53 regulates transcription of additional cell cycle genes whose exact role in the p53 pathway remain uncertain; Nuclear import of Rev protein; Deposition of new CENPA-containing nucleosomes at the centromere; SUMOylation of transcription cofactors; TFAP2A acts as a …	24553.2	46262.2	32144	34506.4	34559.1	41330.7	25111.2	46771	37442.7	39633.9	36213.3	42284	24162.3	38347.2	30674.4	25301.3	36352	40635.6	Peak Found	High	Peak Found	Peak Found	Peak Found	High	High	High	High	Peak Found	High
High	P51649	Succinate-semialdehyde dehydrogenase, mitochondrial OS=Homo sapiens OX=9606 GN=ALDH5A1 PE=1 SV=2	2	1	13	1	535	57.2	8.28	27.55	other metabolic processes;developmental processes	mitochondrion	other molecular function	Pf00171	7915	ALDH5A1	B2RD26; G5E949; hsa:7915; P51649; Q546H9; Q8N3W6	ENSG00000112294	Fragile X syndrome	Degradation of GABA	13145.7	15485.1	12983.2	13052.7	12531.3	15888.4	6808.63	13358.6	12500.6	34268.5	11509	20133.1	10145.7	20831.6	11582.5	2793.84	14789.5	17154.9	Peak Found	High	High	Peak Found	High	High	High	High	High	Peak Found	Peak Found
High	Q86VP6	Cullin-associated NEDD8-dissociated protein 1 OS=Homo sapiens OX=9606 GN=CAND1 PE=1 SV=2	1	1	4	1	1230	136.3	5.78	2.08	cell organization and biogenesis;protein metabolism;other metabolic processes;other biological processes	non-structural extracellular;cytosol;ER/Golgi;nucleus;other cell component	other molecular function	Pf08623	55832	CAND1	B2RAU3; hsa:55832; O94918; Q6PIY4; Q86VP6; Q8NDJ4; Q96JZ9; Q96T19; Q9BTC4; Q9H0G2; Q9P0H7; Q9UF85	ENSG00000111530	Endoderm differentiation	Neutrophil degranulation; Neddylation; Iron uptake and transport	6517.91	4388.86	7347.83	6877.04	5595.26	5100.02	6474.51	6833.63	3468.88	15652.4	6730.21	4993.82	18423.6	4367.56	4946.84	19734	7884.47	5357.82	Not Found	Not Found	Not Found	Not Found	Not Found	Not Found	Not Found	Not Found	Not Found	High	Not Found
High	P13667	Protein disulfide-isomerase A4 OS=Homo sapiens OX=9606 GN=PDIA4 PE=1 SV=2	2	2	28	2	645	72.9	5.07	29.51	stress response;transport;other biological processes	non-structural extracellular;ER/Golgi;other cell component	other molecular function	Pf00085, Pf13848	9601	PDIA4	A8K4K6; hsa:9601; P13667; Q549T6	ENSG00000155660			38909	40495.6	27831.5	27928.3	32642.9	32285	20947.7	30016.2	40695.7	23390.7	26288.8	30609.9	26982.8	33922.6	28438.6	28679.6	37397.5	28276.8	High	High	High	High	High	High	High	High	High	Peak Found	High
High	Q16181	Septin-7 OS=Homo sapiens OX=9606 GN=SEPTIN7 PE=1 SV=2	6	3	17	3	437	50.6	8.63	27.3	cell cycle OR cell proliferation;cell organization and biogenesis;other biological processes	plasma membrane;other membranes;cytosol;cytoskeleton;nucleus;other cell component	other molecular function	Pf00735	989	SEPTIN7	hsa:989; Q16181; Q52M76; Q6NX50	ENSG00000122545		MAPK6/MAPK4 signaling	22833.7	12639.6	15279.6	16401.7	10882.8	9639.09	13237.6	13192.6	14326.7	11869.1	7558.07	10808.2	11207	5587.19	9394	8977.25	6176.38	12229.8	Peak Found	High	High	High	Peak Found	Peak Found	High	High	High	High	High
High	Q99536	Synaptic vesicle membrane protein VAT-1 homolog OS=Homo sapiens OX=9606 GN=VAT1 PE=1 SV=2	3	1	6	1	393	41.9	6.29	5.39	other biological processes	non-structural extracellular;other membranes;mitochondrion;other cytoplasmic organelle	other molecular function	Pf08240, Pf13602	10493	VAT1	A8K345; B0AZP7; B4DPX4; hsa:10493; Q13035; Q5BKZ7; Q96A39; Q99536; Q9BUT8	ENSG00000108828		Neutrophil degranulation	9384.09	11784.6	13152.6	10927.2	10915.5	10741.8	10317.4	15333.1	11151.4	5412.17	5902.85	6494.22	5652.56	9620.08	9289.92	6408.94	8212.19	5970.72	Peak Found	High	Peak Found	Peak Found	Peak Found	Peak Found	Peak Found	High	High	Peak Found	High
High	P27797	Calreticulin OS=Homo sapiens OX=9606 GN=CALR PE=1 SV=1	8	4	44	4	417	48.1	4.44	65.52	cell organization and biogenesis;protein metabolism;other metabolic processes;stress response;transport;developmental processes;signal transduction;other biological processes	non-structural extracellular;extracellular matrix;plasma membrane;other membranes;cytosol;ER/Golgi;nucleus;other cytoplasmic organelle;other cell component	signal transduction activity or receptor binding;nucleic acid binding activity;other molecular function	Pf00262	811	CALR	hsa:811; P27797; Q6IAT4; Q9UDG2	ENSG00000179218	Androgen receptor signaling pathway; Complement system; Photodynamic therapy-induced unfolded protein response; VEGFA-VEGFR2 signaling pathway; GDNF signaling; Calcium regulation in cardiac cells	ER-Phagosome pathway; Antigen Presentation: Folding, assembly and peptide loading of class I MHC; Scavenging by Class A Receptors; Assembly of Viral Components at the Budding Site; Scavenging by Class F Receptors; ATF6 (ATF6-alpha) activates chaperone genes; Calnexin/calreticulin cycle	2421.18	8601.58	12500.4	3827.3	8933.34	2951.8	4445.56	11500	5632.87	2410.81	2735.6	2208.99	3224.37	3883.09	3093.67	2247.31	2382.66	3641.24	High	High	Peak Found	High	High	High	High	High	High	High	High
High	O15145	Actin-related protein 2/3 complex subunit 3 OS=Homo sapiens OX=9606 GN=ARPC3 PE=1 SV=3	9	2	37	2	178	20.5	8.59	54.18	cell organization and biogenesis;other biological processes	cytosol;cytoskeleton;nucleus;other cell component	cytoskeletal activity	Pf04062	10094	ARPC3	hsa:10094; O00554; O15145	ENSG00000111229	Pathogenic Escherichia coli infection	Regulation of actin dynamics for phagocytic cup formation; FCGR3A-mediated phagocytosis; RHO GTPases Activate WASPs and WAVEs; Clathrin-mediated endocytosis; EPHB-mediated forward signaling	24582.5	15797.5	21228.7	11235.3	16322.5	30331.5	19506.1	21182.6	30421	13887.9	10166.9	14575.6	6466.13	21131.2	13743.5	6748.74	12872.3	12980.1	High	High	High	High	High	High	High	High	High	High	High
High	P22392	Nucleoside diphosphate kinase B OS=Homo sapiens OX=9606 GN=NME2 PE=1 SV=1	9	1	1	1	152	17.3	8.41	0	cell adhesion;protein metabolism;other metabolic processes;signal transduction;other biological processes	non-structural extracellular;cytosol;other cell component	nucleic acid binding activity;kinase activity;other molecular function	Pf00334	4831; 654364	NME2	A8MWA3; hsa:4831; hsa:654364; P22392; Q1WM23; Q6LCT6	ENSG00000243678	Pyrimidine metabolism	Neutrophil degranulation; Interconversion of nucleotide di- and triphosphates; Azathioprine ADME	14563.3	9339.9	7563.46	11331.1	2671.92	3741.48	11372.1	9234.4	9361.27	3589.65	3886.07	2104.05	3853.39	1800.87	3138.37	3117.08	2687.97	3539.14	High	Peak Found	Peak Found	Peak Found	Not Found	Not Found	Peak Found	Peak Found	Peak Found	Not Found	Not Found
High	P08670	Vimentin OS=Homo sapiens OX=9606 GN=VIM PE=1 SV=4	22	9	92	8	466	53.6	5.12	103.68	cell organization and biogenesis;stress response;developmental processes;signal transduction;other biological processes	plasma membrane;other membranes;cytosol;cytoskeleton;nucleus;other cytoplasmic organelle;other cell component	cytoskeletal activity;nucleic acid binding activity;other molecular function	Pf00038, Pf04732	7431	VIM	B0YJC2; D3DRU4; hsa:7431; P08670; Q15867; Q15868; Q15869; Q548L2; Q6LER9; Q8N850; Q96ML2; Q9NTM3	ENSG00000026025	Allograft rejection; Spinal cord injury; Primary focal segmental glomerulosclerosis (FSGS); Mammary gland development pathway - Puberty (Stage 2 of 4); Apoptosis-related network due to altered Notch3 in ovarian cancer; Striated muscle contraction pathway; TGF-beta signaling in thyroid cells for epithelial-mesenchymal transition; Ciliary landscape; Burn wound healing; CCL18 signaling pathway; T-ce…	Aggrephagy; Interleukin-4 and Interleukin-13 signaling; Late endosomal microautophagy; Chaperone Mediated Autophagy; RHOBTB1 GTPase cycle; Striated Muscle Contraction; Caspase-mediated cleavage of cytoskeletal proteins	41436.4	61935.8	52881.1	40358.5	62988.7	32648.6	40013.7	50111.6	42411.6	29890.5	26442.5	33376.4	33846.7	37443.9	32327.8	33612.2	31652	27394	High	High	High	High	High	High	High	High	High	High	High
High	P33240	Cleavage stimulation factor subunit 2 OS=Homo sapiens OX=9606 GN=CSTF2 PE=1 SV=1	4	2	2	2	577	60.9	6.83	0	RNA metabolism OR transcription;other metabolic processes;other biological processes	nucleus	nucleic acid binding activity	Pf00076, Pf14304, Pf14327	1478	CSTF2	hsa:1478; P33240; Q5H951; Q6LA74; Q8N502	ENSG00000101811	mRNA processing	mRNA 3'-end processing; RNA Polymerase II Transcription Termination; mRNA Splicing - Major Pathway; tRNA processing in the nucleus; Processing of Intronless Pre-mRNAs	7509.04	1680.79	2459.53	7859.95	2597.15	3607.54	6543.98	3320.22	4425.68	2427.24	3490.43	2904.86	3011.15	2303.76	3052.01	2116.13	2926.17	3308.48	Peak Found	Not Found	Not Found	Peak Found	Not Found	Not Found	High	Peak Found	Peak Found	Not Found	Not Found
High	O75380	NADH dehydrogenase [ubiquinone] iron-sulfur protein 6, mitochondrial OS=Homo sapiens OX=9606 GN=NDUFS6 PE=1 SV=1	18	1	1	1	124	13.7	8.28	0	other metabolic processes;transport	other membranes;mitochondrion	transporter activity;other molecular function	Pf10276	4726	NDUFS6	hsa:4726; O75380	ENSG00000145494	Electron transport chain: OXPHOS system in mitochondria; Nonalcoholic fatty liver disease; Oxidative phosphorylation	Complex I biogenesis	24273.6	2687.98	8623.27	19304.5	3614.61	3851.5	22240.4	8955.31	9277.7	3244.99	1943.35	3356.57	3705.03	1767.68	3179.53	1692.19	1439.45	2163.85	Peak Found	Not Found	High	Peak Found	Not Found	Not Found	Peak Found	Peak Found	Peak Found	Not Found	Not Found
High	Q6IS14	Eukaryotic translation initiation factor 5A-1-like OS=Homo sapiens OX=9606 GN=EIF5AL1 PE=2 SV=2	29	3	14	3	154	16.8	5	22.02	protein metabolism;other metabolic processes;transport;other biological processes	other membranes;ER/Golgi;nucleus	translation activity;nucleic acid binding activity	Pf01287	143244	EIF5AL1	hsa:143244; Q6IS14	ENSG00000253626			50011.8	31263.1	37459.5	50297.2	29027.7	27257.1	50952.6	39824.5	36092.7	41231.1	13584.7	11779.1	34383	22599.2	23277.1	24736.5	11947.5	19461.8	High	Peak Found	Peak Found	High	Peak Found	High	High	Peak Found	High	High	Peak Found
High	P13726	Tissue factor OS=Homo sapiens OX=9606 GN=F3 PE=1 SV=1	5	1	59	1	295	33	7.03	132.02	protein metabolism;other metabolic processes;stress response;signal transduction;other biological processes	non-structural extracellular;extracellular matrix;plasma membrane;other membranes;other cell component	other molecular function	Pf01108, Pf09294	2152	F3	D3DT47; hsa:2152; P13726; Q6FHG2; Q86WH4	ENSG00000117525	Blood clotting cascade; VEGFA-VEGFR2 signaling pathway; Macrophage markers; STING pathway in Kawasaki-like disease and COVID-19; Complement and coagulation cascades	NGF-stimulated transcription; Extrinsic Pathway of Fibrin Clot Formation	84420.7	67265.7	62629.8	85846.7	94266.3	79121.8	56844.1	80019.7	78868.4	63007.2	59789.7	77155.3	61826.6	92058.9	68069.8	50322.7	88185.3	105106	High	High	High	High	High	High	High	High	High	High	High
High	P02545	Prelamin-A/C OS=Homo sapiens OX=9606 GN=LMNA PE=1 SV=1	3	2	7	2	664	74.1	7.02	3.33	cell cycle OR cell proliferation;cell organization and biogenesis;stress response;transport;developmental processes;other biological processes	cytosol;cytoskeleton;nucleus;other cell component	other molecular function	Pf00038, Pf00932	4000	LMNA	B4DI32; D3DVB0; D6RAQ3; E7EUI9; hsa:4000; P02545; P02546; Q5I6Y4; Q5I6Y6; Q5TCJ2; Q5TCJ3; Q6UYC3; Q969I8; Q96JA2	ENSG00000160789	Arrhythmogenic right ventricular cardiomyopathy; Adipogenesis; Fas ligand pathway and stress induction of heat shock proteins; Lamin A-processing pathway; Nephrotic syndrome; Influence of laminopathies on Wnt signaling; Overlap between signal transduction pathways contributing to LMNA laminopathies; Familial partial lipodystrophy (FPLD); Progeria-associated lipodystrophy; Acquired partial lipodys…	Signaling by BRAF and RAF1 fusions; XBP1(S) activates chaperone genes	34841.1	12240.4	23410	23602.8	25825.6	22184.2	13246.9	15834.7	19341.5	15021.9	10549.2	23421.4	12414.7	18690.4	19923.6	13516.6	17856.9	15846	Peak Found	Peak Found	Peak Found	Peak Found	Peak Found	Peak Found	High	Peak Found	Peak Found	Peak Found	Peak Found
High	P61513	60S ribosomal protein L37a OS=Homo sapiens OX=9606 GN=RPL37A PE=1 SV=2	30	2	9	2	92	10.3	10.43	14.39	protein metabolism;other metabolic processes	cytosol;translational apparatus;other cell component	other molecular function	Pf01780	6168	RPL37A	hsa:6168; P12751; P61513; Q6FGF5	ENSG00000197756	Cytoplasmic ribosomal proteins	Regulation of expression of SLITs and ROBOs; Nonsense Mediated Decay (NMD) enhanced by the Exon Junction Complex (EJC); L13a-mediated translational silencing of Ceruloplasmin expression; Formation of a pool of free 40S subunits; GTP hydrolysis and joining of the 60S ribosomal subunit; Major pathway of rRNA processing in the nucleolus and cytosol; SRP-dependent cotranslational protein targeting to…	21157.9	14094	17617.5	18525.5	15760.5	13865.8	17987	16341.3	27412.3	7193.5	6920.63	6909.23	7762.37	12197.7	16147.8	6604.34	11544.8	20470.2	High	High	High	High	High	Peak Found	Peak Found	Peak Found	High	High	Peak Found
High	P41217	OX-2 membrane glycoprotein OS=Homo sapiens OX=9606 GN=CD200 PE=1 SV=4	9	1	2	1	278	31.2	8.51	4.77	cell adhesion;other biological processes	plasma membrane;other membranes;other cell component	other molecular function	Pf00047	4345	CD200	B3KQI1; B4DLW9; D3DN65; hsa:4345; P41217; Q6J2Q6; Q6PIQ4; Q8TB85; Q9H3J3	ENSG00000091972	Vitamin D receptor pathway	Immunoregulatory interactions between a Lymphoid and a non-Lymphoid cell	2561.65	1996.43	2652.88	3113.01	2499.68	2577.1	1644.82	2592.11	2143.21	6819.93	3760.66	2089.7	1977.39	2808.49	1964.75	2455.58	3560.89	2829.98	Not Found	Not Found	Not Found	Not Found	Not Found	Not Found	Not Found	Not Found	Not Found	High	Not Found
High	P23284	Peptidyl-prolyl cis-trans isomerase B OS=Homo sapiens OX=9606 GN=PPIB PE=1 SV=2	16	3	77	3	216	23.7	9.41	87.91	protein metabolism;other metabolic processes;developmental processes;other biological processes	ER/Golgi;nucleus;other cell component	other molecular function	Pf00160	5479	PPIB	A8K534; hsa:5479; P23284; Q6IBH5; Q9BVK5	ENSG00000166794	Prolactin signaling pathway; Type I collagen synthesis in the context of osteogenesis imperfecta	Collagen biosynthesis and modifying enzymes	17788.2	17651	18016.1	22946.8	25736	23976.9	68311.3	15907.1	21116.7	14919.5	17918.7	15576.9	17718	26239.7	13853.1	8675.23	27119.6	13502.6	High	High	High	High	High	High	High	High	High	High	High
High	P32969	60S ribosomal protein L9 OS=Homo sapiens OX=9606 GN=RPL9 PE=1 SV=1	6	1	13	1	192	21.9	9.95	31.71	protein metabolism;other metabolic processes	cytosol;translational apparatus;other cell component	nucleic acid binding activity;other molecular function	Pf00347	6133	RPL9; RPL9P7; RPL9P8; RPL9P9	hsa:6133; P32969	ENSG00000163682	Cytoplasmic ribosomal proteins	Regulation of expression of SLITs and ROBOs; Nonsense Mediated Decay (NMD) enhanced by the Exon Junction Complex (EJC); L13a-mediated translational silencing of Ceruloplasmin expression; Formation of a pool of free 40S subunits; GTP hydrolysis and joining of the 60S ribosomal subunit; Major pathway of rRNA processing in the nucleolus and cytosol; SRP-dependent cotranslational protein targeting to…	14621	13325.1	13047.5	17596.5	7737.48	2716.59	9472.28	9127.43	12343.2	7603.94	5112.63	7794.28	5615.21	5677.19	8221.61	5166.73	7369.29	6399.67	High	High	High	Peak Found	High	Not Found	High	High	High	High	High
High	Q96QC0	Serine/threonine-protein phosphatase 1 regulatory subunit 10 OS=Homo sapiens OX=9606 GN=PPP1R10 PE=1 SV=1	3	2	2	2	940	99	9.17	4.32	transport;other biological processes	nucleus;other cell component	enzyme regulator activity;nucleic acid binding activity;other molecular function	Pf00642, Pf08711	5514	PPP1R10	hsa:5514; O00405; Q96QC0	ENSG00000204569; ENSG00000206489; ENSG00000227804; ENSG00000230995; ENSG00000231737; ENSG00000235291; ENSG00000238104			3023.82	3479.56	2336.39	2067.11	1873.64	3294.8	6557.01	1962.46	1824.07	3040.25	2972.53	3823.49	1498.54	3866.87	1502.19	1958.17	3125.82	4012.92	Not Found	Not Found	Not Found	Not Found	Not Found	Not Found	High	Not Found	Not Found	Not Found	Not Found
High	P14866	Heterogeneous nuclear ribonucleoprotein L OS=Homo sapiens OX=9606 GN=HNRNPL PE=1 SV=2	8	2	7	2	589	64.1	8.22	10.64	RNA metabolism OR transcription;other metabolic processes;other biological processes	nucleus;other cell component	nucleic acid binding activity	Pf00076, Pf11835, Pf13893	3191	HNRNPL	A6ND69; A6NIT8; hsa:3191; P14866; Q9H3P3	ENSG00000104824; ENSG00000282947	mRNA processing	mRNA Splicing - Major Pathway; Processing of Capped Intron-Containing Pre-mRNA	51530.1	40275.8	4285.22	38879.1	6492.02	6700.92	37447	38861.1	9682.3	7964.06	4588.98	3912.19	4844.74	5010.76	4366.1	7476.6	4101.55	5510.74	High	Peak Found	Not Found	High	Not Found	Not Found	High	High	High	Not Found	Not Found
High	P04075	Fructose-bisphosphate aldolase A OS=Homo sapiens OX=9606 GN=ALDOA PE=1 SV=2	8	2	72	2	364	39.4	8.09	176.7	cell organization and biogenesis;other metabolic processes;other biological processes	non-structural extracellular;cytosol;cytoskeleton;other cell component	cytoskeletal activity;other molecular function	Pf00274	226	ALDOA	B4DXI7; hsa:226; P04075; Q6FH76; Q6FI10; Q96B15; Q9BWD9; Q9UCN2	ENSG00000149925	VEGFA-VEGFR2 signaling pathway; Clear cell renal cell carcinoma pathways; Aerobic glycolysis; 16p11.2 proximal deletion syndrome; Glycolysis and gluconeogenesis; Sudden infant death syndrome (SIDS) susceptibility pathways	Neutrophil degranulation; Glycolysis; Gluconeogenesis; Platelet degranulation	222374	149842	174448	276719	77650.6	141288	266774	245336	193387	105014	87013.9	57193.7	102069	107762	94279.7	73474.1	71582.6	111893	High	High	High	High	High	High	High	High	High	High	High
High	P29279	CCN family member 2 OS=Homo sapiens OX=9606 GN=CCN2 PE=1 SV=2	2	1	5	1	349	38.1	8	7.12	cell adhesion;cell cycle OR cell proliferation;cell organization and biogenesis;DNA metabolism;other metabolic processes;stress response;transport;developmental processes;signal transduction;other biological processes	non-structural extracellular;extracellular matrix;plasma membrane;other membranes;cytosol;ER/Golgi;other cell component	signal transduction activity or receptor binding;other molecular function	Pf00007, Pf00093, Pf00219, Pf19035	1490	CCN2	E1P578; hsa:1490; P29279; Q6LCY0; Q96A79; Q96QX2; Q9UDL6	ENSG00000118523	Lung fibrosis; Hypothesized pathways in pathogenesis of cardiovascular disease; VEGFA-VEGFR2 signaling pathway; Envelope proteins and their potential roles in EDMD physiopathology; Hippo-Merlin signaling dysregulation; Netrin-UNC5B signaling pathway; Angiotensin II receptor type 1 pathway; Malignant pleural mesothelioma; Orexin receptor pathway	YAP1- and WWTR1 (TAZ)-stimulated gene expression; RUNX3 regulates YAP1-mediated transcription	15190.5	3486.7	2412.76	43154.2	42103.6	17860.9	2697.03	15328.7	11157	10408.8	11351.8	15300.2	30036.5	23269.2	30308.9	14074	15580.5	37278	Peak Found	Not Found	Not Found	Peak Found	Peak Found	High	Not Found	Peak Found	Peak Found	Peak Found	High
High	P50991	T-complex protein 1 subunit delta OS=Homo sapiens OX=9606 GN=CCT4 PE=1 SV=4	3	1	15	1	539	57.9	7.83	11.07	transport;other biological processes	cytosol;cytoskeleton;nucleus;other cell component	other molecular function	Pf00118	10575	CCT4	B2R6I3; B7Z8B1; F5H5W3; hsa:10575; O14870; P50991; Q53QP9; Q96C51	ENSG00000115484	16p11.2 proximal deletion syndrome	Formation of tubulin folding intermediates by CCT/TriC; Association of TriC/CCT with target proteins during biosynthesis; Prefoldin mediated transfer of substrate to CCT/TriC; BBSome-mediated cargo-targeting to cilium; Cooperation of PDCL (PhLP1) and TRiC/CCT in G-protein beta folding; Folding of actin by CCT/TriC	99008.4	28397.5	35160.5	63343.3	16948.7	30911.7	64195.2	61175.9	43149.7	28583.5	9762.68	6563.65	21381.7	9962.73	38560.4	18560.8	5976.79	14476.9	High	High	High	High	Peak Found	High	High	High	High	High	High
High	O15042	U2 snRNP-associated SURP motif-containing protein OS=Homo sapiens OX=9606 GN=U2SURP PE=1 SV=2	1	1	1	1	1029	118.2	8.47	2.23	RNA metabolism OR transcription;other metabolic processes	nucleus		Pf00076, Pf01805, Pf04818, Pf08312	23350	U2SURP	A0PJ60; hsa:23350; O15042; Q0D2M1; Q2NKQ7; Q9BR70	ENSG00000163714		mRNA Splicing - Major Pathway	3541.79	12894.2	9938.03	4681.49	7676.21	3279.45	7136.88	8922.98	6797.81	3398.96	2213.79	2945.23	4164.64	3220.36	1474.91	2369.59	3995.38	1483.06	Not Found	Peak Found	Peak Found	Peak Found	Peak Found	Not Found	Peak Found	Peak Found	High	Not Found	Not Found
High	P08238	Heat shock protein HSP 90-beta OS=Homo sapiens OX=9606 GN=HSP90AB1 PE=1 SV=4	16	9	76	4	724	83.2	5.03	100.92	cell organization and biogenesis;DNA metabolism;other metabolic processes;stress response;developmental processes;other biological processes	non-structural extracellular;plasma membrane;other membranes;cytosol;nucleus;other cytoplasmic organelle;other cell component	signal transduction activity or receptor binding;enzyme regulator activity;cytoskeletal activity;nucleic acid binding activity;other molecular function	Pf00183, Pf02518	3326	HSP90AB1	B2R5P0; hsa:3326; P08238; Q5T9W7; Q9NQW0; Q9NTK6	ENSG00000096384	Nuclear receptors meta-pathway; NRF2 pathway; Focal adhesion: PI3K-Akt-mTOR-signaling pathway; PI3K-Akt signaling pathway	Regulation of actin dynamics for phagocytic cup formation; The role of GTSE1 in G2/M progression after G2 checkpoint; HSP90 chaperone cycle for steroid hormone receptors (SHR) in the presence of ligand; Neutrophil degranulation; Estrogen-dependent gene expression; Chaperone Mediated Autophagy; Sema3A PAK dependent Axon repulsion; Potential therapeutics for SARS; Purinergic signaling in leishmania…	22427.1	18239.5	26253.6	22298	18865.2	12720.4	31594.6	20178.7	32244.3	8741.44	10788.9	6906.98	10537.8	14202.5	12657.2	9627.08	8881.02	8730.93	High	High	High	High	High	Peak Found	High	High	High	High	Peak Found
High	Q15019	Septin-2 OS=Homo sapiens OX=9606 GN=SEPTIN2 PE=1 SV=1	12	3	56	3	361	41.5	6.6	142.65	cell cycle OR cell proliferation;cell organization and biogenesis;signal transduction;other biological processes	non-structural extracellular;plasma membrane;other membranes;cytoskeleton;ER/Golgi;nucleus;other cell component	other molecular function	Pf00735	4735	SEPTIN2	B4DGE8; hsa:4735; Q14132; Q15019; Q53QU3; Q8IUK9; Q96CB0	ENSG00000168385	2q37 copy number variation syndrome	Anchoring of the basal body to the plasma membrane	99509.3	123427	126113	122990	82692.3	101178	191062	128223	164442	50225.1	41917.1	53490.3	65018	84095.4	57419.7	61372.2	43746.4	46752.7	High	High	High	High	High	High	High	High	High	High	High
High	P62273	40S ribosomal protein S29 OS=Homo sapiens OX=9606 GN=RPS29 PE=1 SV=2	39	2	32	2	56	6.7	10.13	51.62	protein metabolism;other metabolic processes	other membranes;cytosol;ER/Golgi;translational apparatus;nucleus;other cell component	other molecular function	Pf00253	6235	RPS29	A8MZ73; hsa:6235; P30054; P62273	ENSG00000213741	Cytoplasmic ribosomal proteins	Regulation of expression of SLITs and ROBOs; Nonsense Mediated Decay (NMD) enhanced by the Exon Junction Complex (EJC); L13a-mediated translational silencing of Ceruloplasmin expression; Formation of a pool of free 40S subunits; GTP hydrolysis and joining of the 60S ribosomal subunit; Major pathway of rRNA processing in the nucleolus and cytosol; SRP-dependent cotranslational protein targeting to…	56279.6	67888.1	41276.7	155537	43066.3	38998.7	54637.3	42782.4	50350.8	20528.4	11539.9	12097.2	27672.3	30665	26148.5	13136.8	11540.4	17945.2	High	High	High	High	High	High	High	High	High	High	High
High	P23246	Splicing factor, proline- and glutamine-rich OS=Homo sapiens OX=9606 GN=SFPQ PE=1 SV=2	2	1	3	1	707	76.1	9.44	5.86	cell organization and biogenesis;protein metabolism;DNA metabolism;RNA metabolism OR transcription;other metabolic processes;stress response;transport;other biological processes	cytosol;nucleus;other cell component	nucleic acid binding activity;other molecular function	Pf00076, Pf08075	6421	SFPQ	hsa:6421; P23246; P30808; Q5SZ71	ENSG00000116560	mRNA processing; Type 2 papillary renal cell carcinoma	Suppression of apoptosis; PTK6 Regulates Proteins Involved in RNA Processing	22327	2736.52	2045.86	10761.2	2435.25	3559.21	18755.6	3185.61	4009.18	2527.07	1611.94	2854.31	2231.45	1612.15	2452.26	3207.6	1644.09	2381.81	High	Not Found	Not Found	High	Not Found	Not Found	High	Not Found	Not Found	Not Found	Not Found
High	P22626	Heterogeneous nuclear ribonucleoproteins A2/B1 OS=Homo sapiens OX=9606 GN=HNRNPA2B1 PE=1 SV=2	8	2	13	2	353	37.4	8.95	19.19	cell organization and biogenesis;RNA metabolism OR transcription;other metabolic processes;transport;other biological processes	non-structural extracellular;nucleus;other cell component	nucleic acid binding activity;other molecular function	Pf00076	3181	HNRNPA2B1	A0A024RA27; A0A024RA61; A8K064; hsa:3181; P22626; P22627; Q9UC98; Q9UDJ2	ENSG00000122566	mRNA processing	mRNA Splicing - Major Pathway; Processing of Capped Intron-Containing Pre-mRNA; Gene and protein expression by JAK-STAT signaling after Interleukin-12 stimulation	2105.39	7001.35	2741.33	4249.99	22198.1	10062.7	2218.38	3618.81	6217.78	3704.11	4693.77	15614.5	7374.18	4777.9	6286.99	3520.34	8807.95	5964.65	High	Peak Found	Peak Found	High	High	Peak Found	High	Peak Found	Peak Found	High	Peak Found
High	Q15084	Protein disulfide-isomerase A6 OS=Homo sapiens OX=9606 GN=PDIA6 PE=1 SV=1	7	3	55	3	440	48.1	5.08	123.65	other biological processes	non-structural extracellular;plasma membrane;other membranes;cytosol;ER/Golgi;other cell component	other molecular function	Pf00085	10130	PDIA6	B3KY95; B5MCQ5; B7Z254; B7Z4M8; F8WA83; hsa:10130; Q15084; Q53RC7; Q6ZSH5; Q99778	ENSG00000143870	Photodynamic therapy-induced unfolded protein response; VEGFA-VEGFR2 signaling pathway	Regulation of Insulin-like Growth Factor (IGF) transport and uptake by Insulin-like Growth Factor Binding Proteins (IGFBPs); Post-translational protein phosphorylation; XBP1(S) activates chaperone genes	184718	138415	173206	194603	192280	250630	129449	144913	132527	108526	79888.5	125971	120344	132023	101622	77408.3	99089.6	128949	High	High	High	High	High	High	High	High	High	High	High
High	O75663	TIP41-like protein OS=Homo sapiens OX=9606 GN=TIPRL PE=1 SV=2	4	1	31	1	272	31.4	5.91	45.71	stress response;signal transduction;other biological processes	cytosol		Pf04176	261726	TIPRL	B2R8V3; hsa:261726; O75663; Q5HYB2; Q8IZ86	ENSG00000143155	Ciliary landscape		61667.4	38068.7	46615.4	68720.1	60713.5	49364.3	29271.2	33222.7	41817.6	23178	25453	27875.9	39943.1	36573.5	31619.1	21240	26210.1	29921.4	High	High	High	High	High	High	High	High	High	High	High
High	P18065	Insulin-like growth factor-binding protein 2 OS=Homo sapiens OX=9606 GN=IGFBP2 PE=1 SV=2	3	1	3	1	325	34.8	7.5	3.74	signal transduction;other biological processes	non-structural extracellular;plasma membrane;other membranes;other cell component	signal transduction activity or receptor binding;other molecular function	Pf00086, Pf00219	3485	IGFBP2	hsa:3485; P18065; Q14619; Q9UCL3	ENSG00000115457	Myometrial relaxation and contraction pathways; Photodynamic therapy-induced HIF-1 survival signaling	Regulation of Insulin-like Growth Factor (IGF) transport and uptake by Insulin-like Growth Factor Binding Proteins (IGFBPs)	6864.83	9333.9	11277.6	8221.33	9194.73	2160.42	5028.27	8995.67	5461.18	3438.24	2985.22	2900.83	4981.18	4892.39	3314.75	2537.34	3263.71	3547.89	High	High	High	Peak Found	Peak Found	Not Found	Peak Found	Peak Found	Peak Found	Not Found	Peak Found
High	P46781	40S ribosomal protein S9 OS=Homo sapiens OX=9606 GN=RPS9 PE=1 SV=3	6	1	2	1	194	22.6	10.65	4.22	protein metabolism;other metabolic processes;other biological processes	cytosol;translational apparatus;nucleus;other cell component	nucleic acid binding activity;other molecular function	Pf00163, Pf01479	6203	RPS9	A9C4C1; hsa:6203; P46781; Q4QRK7; Q9BVZ0	ENSG00000170889; ENSG00000274005; ENSG00000274626; ENSG00000274646; ENSG00000274950; ENSG00000275323; ENSG00000277079; ENSG00000277359; ENSG00000278081; ENSG00000278270	Cytoplasmic ribosomal proteins	L13a-mediated translational silencing of Ceruloplasmin expression; Translation initiation complex formation; Formation of a pool of free 40S subunits; Formation of the ternary complex, and subsequently, the 43S complex; Ribosomal scanning and start codon recognition; GTP hydrolysis and joining of the 60S ribosomal subunit; SRP-dependent cotranslational protein targeting to membrane; Regulation of…	14697.6	19566.1	18294.1	15033.1	10614.9	20797.1	21553.6	26812.3	14848.6	5297.96	4671.84	7856.29	8611.29	7107.83	8639.83	6484.82	12694	8835.43	Peak Found	High	High	Peak Found	Peak Found	Peak Found	Peak Found	Peak Found	Peak Found	Peak Found	Peak Found
High	P62269	40S ribosomal protein S18 OS=Homo sapiens OX=9606 GN=RPS18 PE=1 SV=3	19	3	28	3	152	17.7	10.99	26.25	protein metabolism;other metabolic processes	cytosol;translational apparatus;nucleus;other cell component	nucleic acid binding activity;other molecular function	Pf00416	6222	RPS18	hsa:6222; P25232; P62269; Q5SUJ3; Q6IPF8	ENSG00000096150; ENSG00000223367; ENSG00000226225; ENSG00000231500; ENSG00000235650	Cytoplasmic ribosomal proteins	Regulation of expression of SLITs and ROBOs; Nonsense Mediated Decay (NMD) enhanced by the Exon Junction Complex (EJC); L13a-mediated translational silencing of Ceruloplasmin expression; Formation of a pool of free 40S subunits; GTP hydrolysis and joining of the 60S ribosomal subunit; Major pathway of rRNA processing in the nucleolus and cytosol; SRP-dependent cotranslational protein targeting to…	15642.8	11678.7	11783.6	9871.76	5056.14	1725.19	13982.9	18768.8	11128.6	3131.24	2906.81	3168.33	4058.9	2895.81	2446.48	2714.7	3147.6	1876.24	High	High	High	High	High	High	High	High	High	High	Peak Found
High	P50990	T-complex protein 1 subunit theta OS=Homo sapiens OX=9606 GN=CCT8 PE=1 SV=4	6	2	5	2	548	59.6	5.6	8.77	cell organization and biogenesis;transport;other biological processes	non-structural extracellular;cytosol;cytoskeleton;nucleus;other cytoplasmic organelle;other cell component	other molecular function	Pf00118	10694	CCT8	A6NN54; B4DEM7; B4DQH4; hsa:10694; P50990; Q4VBP8	ENSG00000156261	16p11.2 proximal deletion syndrome	Formation of tubulin folding intermediates by CCT/TriC; Neutrophil degranulation; Association of TriC/CCT with target proteins during biosynthesis; Prefoldin mediated transfer of substrate to CCT/TriC; BBSome-mediated cargo-targeting to cilium; Cooperation of PDCL (PhLP1) and TRiC/CCT in G-protein beta folding; Folding of actin by CCT/TriC	10816.3	4024.81	2802.33	22327.9	1988.02	4046	20696.9	3866.92	4208.7	3171.91	3189.69	3755.14	2814.29	2311.63	1583.52	1711.23	3927.56	3149.83	High	Not Found	Not Found	High	Not Found	Not Found	High	High	Peak Found	Not Found	Not Found
High	Q13642	Four and a half LIM domains protein 1 OS=Homo sapiens OX=9606 GN=FHL1 PE=1 SV=4	8	2	5	2	323	36.2	8.97	3.38	other biological processes	plasma membrane;other membranes;cytosol;nucleus;other cell component	other molecular function	Pf00412	2273	FHL1	B7Z5T4; B7Z793; hsa:2273; O95212; Q13230; Q13642; Q13645; Q5JXI7; Q5M7Y6; Q6IB30; Q9NZ40; Q9UKZ8; Q9Y630	ENSG00000022267	Notch signaling pathway		19659	7153.72	13915.6	15955.3	6718.2	33166.2	24909.2	16234.3	28126.5	3720.49	14518	7602.83	4980.24	19729.8	9069.59	11353.4	9817.03	13079.5	Peak Found	Not Found	Peak Found	Peak Found	Not Found	Peak Found	High	Peak Found	High	High	Peak Found
High	P07900	Heat shock protein HSP 90-alpha OS=Homo sapiens OX=9606 GN=HSP90AA1 PE=1 SV=5	15	10	83	5	732	84.6	5.02	100.2	cell organization and biogenesis;protein metabolism;DNA metabolism;other metabolic processes;stress response;transport;developmental processes;other biological processes	non-structural extracellular;plasma membrane;other membranes;cytosol;mitochondrion;nucleus;other cytoplasmic organelle;other cell component	enzyme regulator activity;cytoskeletal activity;other molecular function	Pf00183, Pf02518	3320	HSP90AA1	A8K500; B3KPJ9; hsa:3320; P07900; Q2PP14; Q5CAQ6; Q5CAQ7; Q9BVQ5	ENSG00000080824	Nucleotide-binding oligomerization domain (NOD) pathway; TNF-alpha signaling pathway; Corticotropin-releasing hormone signaling pathway; Aryl hydrocarbon receptor pathway; Ebstein-Barr virus LMP1 signaling; Aryl hydrocarbon receptor pathway; Constitutive androstane receptor pathway; Pregnane X receptor pathway; Glucocorticoid receptor pathway; Nuclear receptors meta-pathway; NRF2 pathway; VEGFA-V…	Regulation of actin dynamics for phagocytic cup formation; The role of GTSE1 in G2/M progression after G2 checkpoint; HSP90 chaperone cycle for steroid hormone receptors (SHR) in the presence of ligand; Recruitment of NuMA to mitotic centrosomes; Aggrephagy; Neutrophil degranulation; Interleukin-4 and Interleukin-13 signaling; Estrogen-dependent gene expression; Chaperone Mediated Autophagy; Sema…	412881	501368	452169	379574	449968	335104	329305	361948	405755	124418	144149	257338	159828	240167	215213	124592	174478	211387	High	High	High	High	High	Peak Found	High	High	High	High	High
High	P04040	Catalase OS=Homo sapiens OX=9606 GN=CAT PE=1 SV=3	2	1	21	1	527	59.7	7.39	48.62	protein metabolism;other metabolic processes;stress response;developmental processes;other biological processes	non-structural extracellular;plasma membrane;other membranes;cytosol;mitochondrion;ER/Golgi;other cytoplasmic organelle;other cell component	other molecular function	Pf00199, Pf06628	847	CAT	A8K6C0; B2RCZ9; D3DR07; hsa:847; P04040; Q2M1U4; Q4VXX5; Q9BWT9; Q9UC85	ENSG00000121691	Selenium micronutrient network; Folate metabolism; Amyotrophic lateral sclerosis (ALS); Oxidative stress response; Tryptophan metabolism; Male infertility; DNA damage response (only ATM dependent)	Neutrophil degranulation; Peroxisomal protein import; FOXO-mediated transcription of oxidative stress, metabolic and neuronal genes; Detoxification of Reactive Oxygen Species	47693.7	54285	107304	49586.9	91355.1	206027	51244.8	68597.1	124194	60485	74579.9	105783	51410.3	97783.8	40475.8	59529.4	124862	96704.2	Peak Found	High	High	High	High	High	High	High	High	High	High
High	Q06830	Peroxiredoxin-1 OS=Homo sapiens OX=9606 GN=PRDX1 PE=1 SV=1	26	4	29	4	199	22.1	8.13	51.86	cell cycle OR cell proliferation;other metabolic processes;stress response;developmental processes;other biological processes	cytosol;nucleus;other cell component	other molecular function	Pf00578, Pf10417	5052	PRDX1	B5BU26; D3DPZ8; hsa:5052; P35703; Q06830; Q2V576; Q5T154; Q5T155	ENSG00000117450	Androgen receptor signaling pathway; Selenium micronutrient network; Nuclear receptors meta-pathway; NRF2 pathway	Detoxification of Reactive Oxygen Species; Deregulated CDK5 triggers multiple neurodegenerative pathways in Alzheimer's disease models; KEAP1-NFE2L2 pathway; TP53 Regulates Metabolic Genes; Nuclear events mediated by NFE2L2	75965.3	58931.9	71257.1	62921.4	76449	78437.5	64364	53973.4	65497	65302.6	36374.3	53274.5	39765.4	48578.7	42074.9	35511.3	52205.8	49669.8	High	High	Peak Found	High	High	High	High	High	High	High	High
High	P46776	60S ribosomal protein L27a OS=Homo sapiens OX=9606 GN=RPL27A PE=1 SV=2	24	4	39	4	148	16.6	11	24.96	protein metabolism;other metabolic processes	cytosol;ER/Golgi;translational apparatus;other cell component	other molecular function	Pf00828	6157	RPL27A	B2R4B3; hsa:6157; P46776	ENSG00000166441	Cytoplasmic ribosomal proteins	L13a-mediated translational silencing of Ceruloplasmin expression; Formation of a pool of free 40S subunits; GTP hydrolysis and joining of the 60S ribosomal subunit; SRP-dependent cotranslational protein targeting to membrane; Regulation of expression of SLITs and ROBOs; Major pathway of rRNA processing in the nucleolus and cytosol; Nonsense Mediated Decay (NMD) enhanced by the Exon Junction Comp…	109238	51566.6	67654.8	87063.7	33686.5	42640.1	195979	72058.2	86542.9	38329.2	13735.2	21096.8	21631.1	23395.6	18061	24839	20525.9	19290.5	High	High	High	High	High	High	High	High	High	High	High
High	Q8IZP0	Abl interactor 1 OS=Homo sapiens OX=9606 GN=ABI1 PE=1 SV=4	3	1	7	1	508	55	7.06	10.37	cell organization and biogenesis;protein metabolism;other metabolic processes;developmental processes;signal transduction;other biological processes	cytosol;cytoskeleton;ER/Golgi;nucleus;other cell component	enzyme regulator activity;cytoskeletal activity;other molecular function	Pf00018, Pf07815	10006	ABI1	A9Z1Y6; B3KX62; B4DQ58; H7BXI6; hsa:10006; O15147; O76049; O95060; Q5T2R3; Q5T2R4; Q5T2R6; Q5T2R7; Q5T2R9; Q5W070; Q5W072; Q8IZP0; Q8TB63; Q96S81; Q9NXZ9; Q9NYB8	ENSG00000136754	EGF/EGFR signaling pathway	Regulation of actin dynamics for phagocytic cup formation; FCGR3A-mediated phagocytosis; RHO GTPases Activate WASPs and WAVEs; VEGFA-VEGFR2 Pathway; RAC1 GTPase cycle; RAC2 GTPase cycle; RAC3 GTPase cycle	19779	11831.6	7347.56	16782.7	6368.9	10724.8	27537.6	11503.6	9877.01	6109.86	2095.08	3431.81	4701.53	5291.76	6554.5	4182.77	2370.44	5390.99	High	High	Peak Found	High	Peak Found	Peak Found	High	High	Peak Found	Peak Found	Not Found
High	Q7Z6Z7	E3 ubiquitin-protein ligase HUWE1 OS=Homo sapiens OX=9606 GN=HUWE1 PE=1 SV=3	0	1	1	1	4374	481.6	5.22	2.24	cell organization and biogenesis;protein metabolism;DNA metabolism;other metabolic processes;stress response;other biological processes	non-structural extracellular;other membranes;cytosol;mitochondrion;ER/Golgi;nucleus;other cell component	nucleic acid binding activity;other molecular function	Pf00627, Pf00632, Pf02825, Pf06012, Pf06025, Pf14377	10075	HUWE1	hsa:10075; O15029; Q4G2Z2; Q5H961; Q6P4D0; Q7Z6Z7; Q8NG67; Q9BUI0; Q9HCJ4; Q9NSL6; Q9P0A9	ENSG00000086758		Neutrophil degranulation; Antigen processing: Ubiquitination & Proteasome degradation	12162.8	11232.9	15085.7	10685.7	13469.7	13936.2	13873.6	18980.3	14786.2	1707.16	5778.91	6204.19	6613.94	8849.12	5311.98	2515.16	7006.3	5843.46	Peak Found	Peak Found	Peak Found	Peak Found	Peak Found	Peak Found	Peak Found	Peak Found	High	Not Found	Peak Found
High	P46779	60S ribosomal protein L28 OS=Homo sapiens OX=9606 GN=RPL28 PE=1 SV=3	15	2	10	2	137	15.7	12.02	24.96	protein metabolism;other metabolic processes	cytosol;translational apparatus;other cell component	other molecular function	Pf01778	6158	RPL28	B2R4A6; B4DEP9; C9JB50; E9PB24; G5E9L2; hsa:6158; P46779; Q6IAY0; Q96FX1; Q9BWQ0	ENSG00000108107	Cytoplasmic ribosomal proteins	Regulation of expression of SLITs and ROBOs; Nonsense Mediated Decay (NMD) enhanced by the Exon Junction Complex (EJC); L13a-mediated translational silencing of Ceruloplasmin expression; Formation of a pool of free 40S subunits; GTP hydrolysis and joining of the 60S ribosomal subunit; Major pathway of rRNA processing in the nucleolus and cytosol; SRP-dependent cotranslational protein targeting to…	12055.9	15899.5	25167.7	17118.4	24367.2	25084.5	14683	24078.4	22046.7	8786.75	13279.4	9500.35	11866.9	17746	10724.5	9118.77	15890.5	13482.2	Peak Found	Peak Found	High	Peak Found	High	High	High	High	High	Peak Found	Peak Found
High	Q9Y6G3	39S ribosomal protein L42, mitochondrial OS=Homo sapiens OX=9606 GN=MRPL42 PE=1 SV=1	6	1	2	1	142	16.7	8.35	1.71	protein metabolism;other metabolic processes	plasma membrane;other membranes;mitochondrion;translational apparatus	other molecular function	Pf10210	28977	MRPL42	hsa:28977; Q6FID1; Q96Q48; Q9P0S1; Q9Y6G3	ENSG00000198015		Mitochondrial translation initiation; Mitochondrial translation elongation; Mitochondrial translation termination	2473.32	2998.53	6153.5	1989.13	7067.25	6569.49	2143.75	15985	8546.67	3972.64	1539.71	2955.64	3650.21	3102.82	1659.33	1549.73	3639.09	3062.21	Not Found	Not Found	Peak Found	Not Found	Peak Found	Peak Found	Not Found	High	Peak Found	Not Found	Not Found
High	P09936	Ubiquitin carboxyl-terminal hydrolase isozyme L1 OS=Homo sapiens OX=9606 GN=UCHL1 PE=1 SV=2	9	2	67	2	223	24.8	5.48	137.69	cell cycle OR cell proliferation;cell organization and biogenesis;protein metabolism;other metabolic processes;stress response;transport;developmental processes;other biological processes	other membranes;cytosol;ER/Golgi;nucleus;other cell component	signal transduction activity or receptor binding;other molecular function	Pf01088	7345	UCHL1	hsa:7345; P09936; Q4W5K6; Q71UM0	ENSG00000154277	Proteasome degradation; Parkinson's disease pathway; Hepatitis C and hepatocellular carcinoma	UCH proteinases	65698.5	107191	95482	75401.1	123765	98588.8	100551	94214.9	93533.4	38806.3	52465.9	40026.3	28698	53827.1	45398.5	22427.7	41016.1	69751.3	High	High	High	High	High	High	High	High	High	High	High
High	P40227	T-complex protein 1 subunit zeta OS=Homo sapiens OX=9606 GN=CCT6A PE=1 SV=3	9	4	13	4	531	58	6.68	8.06	other biological processes	cytosol;cytoskeleton;other cell component	other molecular function	Pf00118	908	CCT6A	A6NCD2; hsa:908; P40227; Q3KP28; Q75LP4; Q96S46	ENSG00000146731	16p11.2 proximal deletion syndrome	Formation of tubulin folding intermediates by CCT/TriC; Association of TriC/CCT with target proteins during biosynthesis; Cooperation of PDCL (PhLP1) and TRiC/CCT in G-protein beta folding; Prefoldin mediated transfer of substrate to CCT/TriC; RHOBTB2 GTPase cycle; Folding of actin by CCT/TriC	146359	65518.2	84234.7	91666.8	96104.4	74411.5	181734	70252.4	74927.8	84958.4	32755.6	29616.7	50422.9	38644.5	42110.6	59327	94411.8	58129.9	High	High	Peak Found	High	High	Peak Found	High	High	High	High	Peak Found
High	P40926	Malate dehydrogenase, mitochondrial OS=Homo sapiens OX=9606 GN=MDH2 PE=1 SV=3	6	2	20	2	338	35.5	8.68	39.89	other metabolic processes	other membranes;mitochondrion;other cell component	other molecular function	Pf00056, Pf02866	4191	MDH2	A8K414; B2RE78; B4DE44; E9PDB2; hsa:4191; O43682; P40926	ENSG00000146701	Amino acid metabolism; Metabolic reprogramming in colon cancer; NAD metabolism in oncogene-induced senescence and mitochondrial dysfunction-associated senescence; Glycolysis and gluconeogenesis; TCA cycle (aka Krebs or citric acid cycle)	Gluconeogenesis; Citric acid cycle (TCA cycle)	13016.9	28112.1	21062.6	18609.5	11432.3	21136	20284.1	16225.4	22379.8	10066.6	10809.6	11027.7	7001.79	8532.14	9636.36	21707.3	12461.6	12529.1	Peak Found	High	High	High	High	High	High	High	High	High	High
High	P84098	60S ribosomal protein L19 OS=Homo sapiens OX=9606 GN=RPL19 PE=1 SV=1	8	2	2	2	196	23.5	11.47	1.68	protein metabolism;other metabolic processes	cytosol;translational apparatus;nucleus;other cell component	other molecular function	Pf01280	6143	RPL19	B2R4K2; hsa:6143; P14118; P22908; P84098; Q502Y6; Q7Z6E4	ENSG00000108298	Cytoplasmic ribosomal proteins	Regulation of expression of SLITs and ROBOs; Nonsense Mediated Decay (NMD) enhanced by the Exon Junction Complex (EJC); L13a-mediated translational silencing of Ceruloplasmin expression; Formation of a pool of free 40S subunits; GTP hydrolysis and joining of the 60S ribosomal subunit; Major pathway of rRNA processing in the nucleolus and cytosol; SRP-dependent cotranslational protein targeting to…	15318.7	17841.4	19873.2	15114.6	17913.6	14792.1	17682.7	25180.7	30988.6	32912.8	6988.01	15800	6491.73	6850.08	6803.1	4974.76	6372.66	5647.55	Peak Found	Peak Found	Peak Found	High	Peak Found	Peak Found	Peak Found	Peak Found	Peak Found	Peak Found	High
High	P12277	Creatine kinase B-type OS=Homo sapiens OX=9606 GN=CKB PE=1 SV=1	3	1	16	1	381	42.6	5.59	37	other metabolic processes;developmental processes;other biological processes	non-structural extracellular;cytosol;mitochondrion;nucleus;other cell component	kinase activity;other molecular function	Pf00217, Pf02807	1152	CKB	A8K236; B2R5R4; hsa:1152; P12277; Q2LE07; Q6FG40; Q9UC66	ENSG00000166165		RND3 GTPase cycle; Creatine metabolism	89980	153051	138553	201417	163753	367311	80588.1	116359	150083	92122.3	105419	94293.9	89049.4	96650	90204.9	75919.8	75190.2	263220	Peak Found	High	High	High	High	High	High	High	High	Peak Found	High
High	Q99538	Legumain OS=Homo sapiens OX=9606 GN=LGMN PE=1 SV=1	3	1	3	1	433	49.4	6.55	5.82	cell organization and biogenesis;protein metabolism;other metabolic processes;other biological processes	non-structural extracellular;other cytoplasmic organelle;other cell component	cytoskeletal activity;other molecular function	Pf01650	5641	LGMN	hsa:5641; O00123; Q86TV2; Q86TV3; Q99538; Q9BTY1	ENSG00000100600		MHC class II antigen presentation; Trafficking and processing of endosomal TLR; Vitamin D (calciferol) metabolism	1872.1	3718.55	3473.31	3159.66	6715.84	7819.75	3831.47	7657.17	8164.94	3078.39	2928.79	1643.44	2671.82	3366.24	2906.24	3900.74	2761.17	1880.22	Not Found	Not Found	Not Found	Not Found	High	Peak Found	Not Found	High	High	Not Found	Not Found
High	P11908	Ribose-phosphate pyrophosphokinase 2 OS=Homo sapiens OX=9606 GN=PRPS2 PE=1 SV=2	3	1	10	1	318	34.7	6.61	20.14	other metabolic processes;other biological processes	other cell component	kinase activity;other molecular function	Pf13793, Pf14572	5634	PRPS2	hsa:5634; P11908; Q0VDH9; Q0VDI0; Q15245; Q2TAK7	ENSG00000101911		5-Phosphoribose 1-diphosphate biosynthesis	24832.1	13908.9	22759.2	13337.4	16259.1	23086.1	17689.8	15047.9	21340.3	6348.07	4759.31	3677.44	5173.62	6996.48	12974.4	2566.3	7785.26	6425.01	High	High	High	High	High	High	Peak Found	High	High	Peak Found	Peak Found
High	Q9Y265	RuvB-like 1 OS=Homo sapiens OX=9606 GN=RUVBL1 PE=1 SV=1	2	1	7	1	456	50.2	6.42	9.24	cell cycle OR cell proliferation;cell organization and biogenesis;protein metabolism;DNA metabolism;other metabolic processes;stress response;other biological processes	other membranes;cytosol;cytoskeleton;nucleus;other cell component	other molecular function	Pf06068, Pf17856	8607	RUVBL1	B2R5S0; hsa:8607; P82276; Q1KMR0; Q53HK5; Q53HL7; Q53Y27; Q9BSX9; Q9Y265	ENSG00000175792; ENSG00000284901	Gastric cancer network 1; lncRNA in canonical Wnt signaling and colorectal cancer	Ub-specific processing proteases; Deposition of new CENPA-containing nucleosomes at the centromere; Formation of the beta-catenin:TCF transactivating complex; HATs acetylate histones; UCH proteinases; DNA Damage Recognition in GG-NER; Telomere Extension By Telomerase	42736.7	48816.1	62777.8	51487.1	66880.6	62329.9	46175.7	51022.4	56498.8	26741.4	22892.2	25648.8	27855.5	25378	24404.9	14022.7	21943.3	32131.7	Peak Found	Peak Found	High	Peak Found	Peak Found	High	High	Peak Found	High	Peak Found	High
High	P61247	40S ribosomal protein S3a OS=Homo sapiens OX=9606 GN=RPS3A PE=1 SV=2	19	4	21	4	264	29.9	9.73	28.19	protein metabolism;other metabolic processes;other biological processes	cytosol;ER/Golgi;translational apparatus;nucleus;other cell component	nucleic acid binding activity;other molecular function	Pf01015	6189	RPS3A	B2R4D4; D3DP05; hsa:6189; P33443; P49241; P61247	ENSG00000145425	Cytoplasmic ribosomal proteins	L13a-mediated translational silencing of Ceruloplasmin expression; Translation initiation complex formation; Formation of a pool of free 40S subunits; Formation of the ternary complex, and subsequently, the 43S complex; Ribosomal scanning and start codon recognition; GTP hydrolysis and joining of the 60S ribosomal subunit; SRP-dependent cotranslational protein targeting to membrane; Regulation of…	123091	97553.5	118212	134765	140770	75957	83630.1	116288	144164	42183.1	36274.1	61853.6	53266.8	132079	50067.5	37852.7	63195.9	68630.3	Peak Found	High	High	High	High	High	High	High	High	High	Peak Found
High	Q8WXF1	Paraspeckle component 1 OS=Homo sapiens OX=9606 GN=PSPC1 PE=1 SV=1	2	1	2	1	523	58.7	6.67	2.27	stress response;other biological processes	nucleus;other cell component		Pf00076, Pf08075	55269	PSPC1	hsa:55269; Q5JTQ3; Q8NCZ9; Q8WXE8; Q8WXF1; Q9NV36	ENSG00000121390			3557.24	19816.6	15272.9	4012.51	15293.3	9101.19	10371.4	49241.4	16717.5	3933.83	2517.91	2040.09	3592.24	4065.97	3348.85	3549.89	4037.02	3977.16	Not Found	Peak Found	High	Not Found	Peak Found	High	Peak Found	Peak Found	Peak Found	Not Found	Not Found
High	Q9ULV4	Coronin-1C OS=Homo sapiens OX=9606 GN=CORO1C PE=1 SV=1	3	1	5	1	474	53.2	7.08	4.04	cell organization and biogenesis;transport;signal transduction;other biological processes	plasma membrane;other membranes;cytoskeleton;other cytoplasmic organelle;other cell component	cytoskeletal activity;other molecular function	Pf00400, Pf08953, Pf16300	23603	CORO1C	A7MAP0; A7MAP1; B3KU12; hsa:23603; Q9NSK5; Q9ULV4	ENSG00000110880			4077.81	2184.28	7587.68	7923.8	8185.54	5146.18	3375.85	7371.12	9974.02	1812.96	4178.39	4051.07	4320.16	3114.84	2842.96	1460.54	4668.93	4784.32	Not Found	Not Found	Peak Found	Peak Found	Peak Found	High	Not Found	High	High	Not Found	Peak Found
High	Q9Y2W1	Thyroid hormone receptor-associated protein 3 OS=Homo sapiens OX=9606 GN=THRAP3 PE=1 SV=2	1	1	5	1	955	108.6	10.15	8.59	RNA metabolism OR transcription;other metabolic processes;other biological processes	nucleus	nucleic acid binding activity;other molecular function	Pf15440	9967	THRAP3	D3DPS5; hsa:9967; Q5VTK6; Q9Y2W1	ENSG00000054118	Interactome of polycomb repressive complex 2 (PRC2)	Transcriptional regulation of white adipocyte differentiation; PPARA activates gene expression	9066.71	7309.64	16030.1	6824.57	6165.93	7750.1	8196.65	7434.77	10389.9	3984.59	1869.95	2310.46	2006.18	2566.89	2693.95	2965.96	2130.56	1414.45	High	High	High	Peak Found	High	High	Peak Found	Peak Found	Peak Found	Not Found	Not Found
High	Q96KP4	Cytosolic non-specific dipeptidase OS=Homo sapiens OX=9606 GN=CNDP2 PE=1 SV=2	3	1	15	1	475	52.8	5.97	25.52	protein metabolism	cytosol;nucleus	other molecular function	Pf01546, Pf07687	55748	CNDP2	B3KUG4; hsa:55748; Q8WY59; Q96KP4; Q9BQ94; Q9NVB4; V9HWE5	ENSG00000133313		Paracetamol ADME; Glutathione synthesis and recycling	42867.4	12346.3	27427.3	25765.2	10794.4	15141.5	23982.4	22246.3	22266.4	6966.58	6537.51	6340.61	5434.24	5584.78	8957.79	5251.2	4845.89	5317.06	High	High	High	High	Peak Found	High	High	High	High	Peak Found	Peak Found
High	P00367	Glutamate dehydrogenase 1, mitochondrial OS=Homo sapiens OX=9606 GN=GLUD1 PE=1 SV=2	8	3	9	3	558	61.4	7.8	11.02	other metabolic processes;other biological processes	mitochondrion;ER/Golgi;other cell component	other molecular function	Pf00208, Pf02812	2746	GLUD1	B3KV55; B4DGN5; hsa:2746; P00367; Q5TBU3	ENSG00000148672	VEGFA-VEGFR2 signaling pathway; Amino acid metabolism; Metabolic reprogramming in colon cancer; 22q11.2 copy number variation syndrome; Amino acid metabolism pathway excerpt: histidine catabolism extension	Transcriptional activation of mitochondrial biogenesis; Glutamate and glutamine metabolism	23696.4	6448.59	10506.3	15859.3	3265.27	101729	58401.7	90793.8	3224.16	7168.9	4289.81	3549.16	7540.38	5343.11	5670.94	8189.01	6077.38	4807.81	High	Not Found	Peak Found	High	High	Peak Found	High	High	High	High	Not Found
High	P47756	F-actin-capping protein subunit beta OS=Homo sapiens OX=9606 GN=CAPZB PE=1 SV=4	4	1	14	1	277	31.3	5.59	18.81	cell organization and biogenesis;other biological processes	other membranes;cytosol;cytoskeleton;other cell component	cytoskeletal activity	Pf01115	832	CAPZB	hsa:832; P47756; Q32Q68; Q5U0L4; Q8TB49; Q9NUC4	ENSG00000077549	VEGFA-VEGFR2 signaling pathway	RHOD GTPase cycle; MHC class II antigen presentation; COPI-mediated anterograde transport; HSP90 chaperone cycle for steroid hormone receptors (SHR) in the presence of ligand; Sensory processing of sound by inner hair cells of the cochlea; COPI-independent Golgi-to-ER retrograde traffic; RHOF GTPase cycle; Factors involved in megakaryocyte development and platelet production	44464.6	72781.8	65797.3	48829.3	37215.1	55983.4	96876.8	46633	53541	17066.1	16091.5	16600	14618.1	17018.1	19903	23320.2	18279.5	22334	Peak Found	High	High	High	High	High	High	High	Peak Found	High	High
High	P40429	60S ribosomal protein L13a OS=Homo sapiens OX=9606 GN=RPL13A PE=1 SV=2	11	2	26	2	203	23.6	10.93	41	protein metabolism;other metabolic processes;stress response;other biological processes	cytosol;translational apparatus;other cell component	nucleic acid binding activity;other molecular function	Pf00572	23521	RPL13A	A8K505; hsa:23521; P40429	ENSG00000142541	VEGFA-VEGFR2 signaling pathway; Cytoplasmic ribosomal proteins	Regulation of expression of SLITs and ROBOs; Nonsense Mediated Decay (NMD) enhanced by the Exon Junction Complex (EJC); L13a-mediated translational silencing of Ceruloplasmin expression; Formation of a pool of free 40S subunits; GTP hydrolysis and joining of the 60S ribosomal subunit; Major pathway of rRNA processing in the nucleolus and cytosol; SRP-dependent cotranslational protein targeting to…	81955.6	55235.9	84499.2	81634	44319.2	52369.3	80249.2	71575.5	81981.3	18580.6	13800.5	17468.1	17297.4	16016.6	18480.7	14018.7	18889.1	31800.3	High	High	High	High	High	High	High	High	High	Peak Found	High
High	Q7Z4V5	Hepatoma-derived growth factor-related protein 2 OS=Homo sapiens OX=9606 GN=HDGFL2 PE=1 SV=1	2	1	3	1	671	74.3	7.49	1.68	other biological processes	nucleus;other cell component	nucleic acid binding activity;other molecular function	Pf00855, Pf11467	84717	HDGFL2	hsa:84717; I3L080; K7EQZ6; Q7Z4V5; Q96GI5; Q9BW08	ENSG00000167674			3271.29	2813.39	1477.23	3894.71	8723.58	7961.66	4502.65	3749.56	2876.14	2179.74	1632.41	3422.96	2616.78	1811.97	2828.42	3503.57	1906.77	1897.75	Not Found	Not Found	Not Found	Not Found	High	Peak Found	Peak Found	High	High	Not Found	Not Found
High	P67809	Y-box-binding protein 1 OS=Homo sapiens OX=9606 GN=YBX1 PE=1 SV=3	6	2	17	2	324	35.9	9.88	22.67	RNA metabolism OR transcription;other metabolic processes;transport;developmental processes;other biological processes	non-structural extracellular;plasma membrane;other membranes;cytosol;ER/Golgi;nucleus;other cell component	nucleic acid binding activity;other molecular function	Pf00313	4904	YBX1	hsa:4904; P16990; P16991; P67809; Q14972; Q15325; Q5FVF0	ENSG00000065978	Brain-derived neurotrophic factor (BDNF) signaling pathway; MECP2 and associated Rett syndrome; mRNA processing; Sudden infant death syndrome (SIDS) susceptibility pathways	mRNA Splicing - Major Pathway; mRNA Splicing - Minor Pathway; Noncanonical activation of NOTCH3	21263.6	18336.8	25434.1	17985.3	20325.5	20535.3	28438.3	22222.4	18862.3	12204.7	8704.74	5427.69	6453.86	15405.4	5963.82	6381.55	15560.5	9300.35	Peak Found	High	High	High	High	High	High	High	High	Peak Found	High
High	P61927	60S ribosomal protein L37 OS=Homo sapiens OX=9606 GN=RPL37 PE=1 SV=2	19	2	8	2	97	11.1	11.74	3.42	protein metabolism;other metabolic processes;other biological processes	cytosol;translational apparatus;other cell component	enzyme regulator activity;nucleic acid binding activity;other molecular function	Pf01907	6167	RPL37	B2R4H2; hsa:6167; P02403; P61927; Q6IBB4; Q99883	ENSG00000145592	Cytoplasmic ribosomal proteins	Regulation of expression of SLITs and ROBOs; Nonsense Mediated Decay (NMD) enhanced by the Exon Junction Complex (EJC); L13a-mediated translational silencing of Ceruloplasmin expression; Formation of a pool of free 40S subunits; GTP hydrolysis and joining of the 60S ribosomal subunit; Major pathway of rRNA processing in the nucleolus and cytosol; SRP-dependent cotranslational protein targeting to…	114898	73270.7	107602	63000.8	56357.5	61602.4	56852.2	73234.7	96168.2	17439.4	18928.4	19147.6	19633.1	19376	16840.6	15508.5	16439.4	15746.6	Peak Found	Peak Found	High	High	High	High	High	High	High	Peak Found	Peak Found
High	P62847-4	Isoform 4 of 40S ribosomal protein S24 OS=Homo sapiens OX=9606 GN=RPS24	4	2	28	1	289	32.4	10.15	15.15						RPS24	P62847-4				377007	420668	381005	314855	440551	333379	308345	482380	326165	112005	110932	164747	86845.6	123080	104070	99032.1	156397	165595	High	High	Peak Found	High	High	High	High	High	High	Peak Found	High
High	P36578	60S ribosomal protein L4 OS=Homo sapiens OX=9606 GN=RPL4 PE=1 SV=5	6	2	8	2	427	47.7	11.06	3.74	protein metabolism;other metabolic processes	cytosol;ER/Golgi;translational apparatus;nucleus;other cell component	other molecular function	Pf00573, Pf14374	6124	RPL4	A8K502; hsa:6124; P36578; P39029; Q4VBR0; Q969Z9	ENSG00000174444	Cytoplasmic ribosomal proteins	Regulation of expression of SLITs and ROBOs; Nonsense Mediated Decay (NMD) enhanced by the Exon Junction Complex (EJC); L13a-mediated translational silencing of Ceruloplasmin expression; Formation of a pool of free 40S subunits; GTP hydrolysis and joining of the 60S ribosomal subunit; Major pathway of rRNA processing in the nucleolus and cytosol; SRP-dependent cotranslational protein targeting to…	24606.4	12501.8	12763.4	9222.19	9055.25	2157.99	8470.8	9822.53	8604.08	3078.42	1846.41	4167.93	2756.23	3724.94	2299.19	2422.65	4529.68	3570.26	Peak Found	High	High	High	Peak Found	Not Found	High	High	High	High	Peak Found
High	Q99832	T-complex protein 1 subunit eta OS=Homo sapiens OX=9606 GN=CCT7 PE=1 SV=2	4	2	11	2	543	59.3	7.65	17.41	transport;other biological processes	cytosol;cytoskeleton;other cell component	other molecular function	Pf00118	10574	CCT7	A8K7E6; A8MWI8; B7WNW9; B7Z4T9; B7Z4Z7; hsa:10574; O14871; Q6FI26; Q99832	ENSG00000135624	VEGFA-VEGFR2 signaling pathway; 16p11.2 proximal deletion syndrome	Formation of tubulin folding intermediates by CCT/TriC; Association of TriC/CCT with target proteins during biosynthesis; Prefoldin mediated transfer of substrate to CCT/TriC; RHOBTB2 GTPase cycle; RHOBTB1 GTPase cycle; Cooperation of PDCL (PhLP1) and TRiC/CCT in G-protein beta folding; Folding of actin by CCT/TriC	12497.7	12065.7	9087.21	7432.86	18234.6	11473.8	6929.11	11317	10231.3	4179.02	4114.33	1845.41	1847.13	3455.6	4557.48	3697.42	4592.86	4018.21	Peak Found	High	High	High	Peak Found	Peak Found	High	High	High	High	Peak Found
High	P62266	40S ribosomal protein S23 OS=Homo sapiens OX=9606 GN=RPS23 PE=1 SV=3	12	1	28	1	143	15.8	10.49	34.55	cell organization and biogenesis;protein metabolism;other metabolic processes	cytosol;ER/Golgi;translational apparatus;nucleus;other cell component	other molecular function	Pf00164	6228	RPS23	hsa:6228; P39028; P62266; Q6IB08	ENSG00000186468	Cytoplasmic ribosomal proteins	Regulation of expression of SLITs and ROBOs; Nonsense Mediated Decay (NMD) enhanced by the Exon Junction Complex (EJC); L13a-mediated translational silencing of Ceruloplasmin expression; Formation of a pool of free 40S subunits; GTP hydrolysis and joining of the 60S ribosomal subunit; Major pathway of rRNA processing in the nucleolus and cytosol; SRP-dependent cotranslational protein targeting to…	155945	118457	157419	159900	63997.9	148964	175192	182881	125700	46035.5	40307.1	48442.1	42217.6	44654.3	50986.7	44108.4	47403.9	95085.8	High	High	High	High	High	High	High	High	High	High	High
High	P13010	X-ray repair cross-complementing protein 5 OS=Homo sapiens OX=9606 GN=XRCC5 PE=1 SV=3	2	1	24	1	732	82.7	5.81	23.19	cell cycle OR cell proliferation;cell organization and biogenesis;DNA metabolism;other metabolic processes;stress response;developmental processes;other biological processes	non-structural extracellular;plasma membrane;other membranes;cytosol;nucleus;other cell component	enzyme regulator activity;nucleic acid binding activity;other molecular function	Pf02735, Pf03730, Pf03731, Pf08785	7520	XRCC5	A8K3X5; hsa:7520; P13010; Q0Z7V0; Q4VBQ5; Q53HH7; Q7M4N0; Q9UCQ0; Q9UCQ1	ENSG00000079246	Non-homologous end joining; Male infertility; DNA repair pathways, full network; p53 transcriptional gene network	Neutrophil degranulation; Nonhomologous End-Joining (NHEJ); Cytosolic sensors of pathogen-associated DNA ; 2-LTR circle formation; IRF3-mediated induction of type I IFN	77070.6	45266.8	70091.7	49383.3	26277.8	53418.5	53101.4	39123.9	39879	18950.5	11355.8	10966	16999.3	12444.4	14559.7	16859.4	9138.23	18204.2	High	High	High	High	High	High	High	High	High	High	High
High	O43670	BUB3-interacting and GLEBS motif-containing protein ZNF207 OS=Homo sapiens OX=9606 GN=ZNF207 PE=1 SV=1	2	1	5	1	478	50.7	9.1	2.24	cell cycle OR cell proliferation;cell organization and biogenesis;signal transduction;other biological processes	cytoskeleton;nucleus;other cell component	cytoskeletal activity;nucleic acid binding activity;other molecular function		7756	ZNF207	A8K6Y6; E1P660; E1P661; E1P662; hsa:7756; O43670; Q53XS9; Q96HW5; Q9BUQ7	ENSG00000010244			11918.6	9902.93	11991.4	9167.82	12521.3	19215.2	2000.14	13052	7805.2	2068.22	3359.5	3557.35	3647.96	3766.81	2360.45	3408.83	1924.78	3729.9	High	High	Peak Found	Peak Found	High	High	Not Found	High	Peak Found	Not Found	Not Found
High	P35637	RNA-binding protein FUS OS=Homo sapiens OX=9606 GN=FUS PE=1 SV=1	2	1	2	1	526	53.4	9.36	1.68	cell organization and biogenesis;RNA metabolism OR transcription;other metabolic processes;other biological processes	nucleus;other cell component	nucleic acid binding activity;other molecular function	Pf00076, Pf00641	2521	FUS	hsa:2521; P35637; Q9H4A8	ENSG00000089280	MECP2 and associated Rett syndrome; mRNA processing	mRNA Splicing - Major Pathway	10191.5	8219.27	5978.83	9503.46	10622	7941.37	5591.28	13435.9	4904.83	2882.07	2036.69	2309.08	3441.88	2687.36	1483.84	1407.76	3170.83	4114.59	High	Peak Found	Peak Found	High	Peak Found	Peak Found	Peak Found	Peak Found	Peak Found	Not Found	Peak Found
High	Q00688	Peptidyl-prolyl cis-trans isomerase FKBP3 OS=Homo sapiens OX=9606 GN=FKBP3 PE=1 SV=1	4	1	2	1	224	25.2	9.28	2.31		nucleus	other molecular function	Pf00254, Pf18410	2287	FKBP3	B2R4Q9; hsa:2287; Q00688; Q14317	ENSG00000100442			13959.2	20287.8	23415.3	42799.8	26617.5	25339.5	14993	16116.4	18020.7	2721.55	5846.03	7376.04	5635.93	8705.65	7514.57	5825.51	9013.39	9732.34	Peak Found	Peak Found	Peak Found	High	Peak Found	Peak Found	Peak Found	Peak Found	High	Not Found	Peak Found
High	P22681	E3 ubiquitin-protein ligase CBL OS=Homo sapiens OX=9606 GN=CBL PE=1 SV=2	2	2	10	2	906	99.6	6.54	17.62	protein metabolism;other metabolic processes;stress response;transport;developmental processes;signal transduction;other biological processes	plasma membrane;other membranes;cytosol;ER/Golgi;other cell component	signal transduction activity or receptor binding;other molecular function	Pf00627, Pf02262, Pf02761, Pf02762, Pf14447	867	CBL	A3KMP8; hsa:867; P22681	ENSG00000110395	RANKL/RANK signaling pathway; Prolactin signaling pathway; Glioblastoma signaling pathways; B cell receptor signaling pathway; IL-3 signaling pathway; Kit receptor signaling pathway; Physico-chemical features and toxicity-associated pathways; T-cell antigen receptor (TCR) pathway during Staphylococcus aureus infection; VEGFA-VEGFR2 signaling pathway; Angiopoietin-like protein 8 regulatory pathway…	Cargo recognition for clathrin-mediated endocytosis; TGF-beta receptor signaling activates SMADs; Negative regulation of MET activity; InlB-mediated entry of Listeria monocytogenes into host cell; Regulation of signaling by CBL; Negative regulation of FLT3; EGFR downregulation; Spry regulation of FGF signaling; Constitutive Signaling by Ligand-Responsive EGFR Cancer Variants; PTK6 Regulates RTKs …	28853.8	24462.3	22300.9	19711.5	19123.8	20228.4	26576.7	28792.6	20774.9	6244.92	4659.59	5691.44	5260.43	5494.51	8148.73	6228.73	7124.87	3716.1	High	High	Peak Found	High	Peak Found	High	High	High	High	Not Found	Not Found
High	Q92945	Far upstream element-binding protein 2 OS=Homo sapiens OX=9606 GN=KHSRP PE=1 SV=4	3	2	16	1	711	73.1	7.3	31.68	RNA metabolism OR transcription;other metabolic processes;transport;other biological processes	cytosol;nucleus;other cell component	nucleic acid binding activity	Pf00013, Pf09005	8570	KHSRP	hsa:8570; O00301; Q59EZ9; Q5U4P6; Q92945; Q9UNT5; Q9UQH5	ENSG00000088247	Pre-implantation embryo	KSRP (KHSRP) binds and destabilizes mRNA; ATF4 activates genes in response to endoplasmic reticulum stress	37608.4	26976.5	28680.6	32239.6	36475.8	30119.8	27394.8	34234.5	32460.7	7160.95	9944.98	7781.9	8510.95	11359.1	8944.08	7613.13	9173.13	6663.72	Peak Found	Peak Found	Peak Found	Peak Found	High	Peak Found	Peak Found	High	Peak Found	Not Found	Not Found
High	Q04726	Transducin-like enhancer protein 3 OS=Homo sapiens OX=9606 GN=TLE3 PE=1 SV=2	2	1	6	1	772	83.4	7.2	7.63	cell-cell signaling;signal transduction;other biological processes	nucleus;other cell component	other molecular function	Pf00400, Pf03920	7090	TLE3	B4DPT0; E9PD64; F8W964; hsa:7090; Q04726; Q6PI57; Q8IVV6; Q8WVR2; Q9HCM5	ENSG00000140332	White fat cell differentiation	Formation of the beta-catenin:TCF transactivating complex; Estrogen-dependent gene expression; Deactivation of the beta-catenin transactivating complex; Repression of WNT target genes	12720.6	14537.1	14472.4	12323.3	23645.3	15728.9	15502.7	15087.9	25707	2600.91	1659.51	5355.57	3170.64	5115.87	4298.13	1785.34	3786.02	4006.2	Peak Found	High	High	Peak Found	Peak Found	High	High	Peak Found	High	Not Found	Not Found
High	P14625	Endoplasmin OS=Homo sapiens OX=9606 GN=HSP90B1 PE=1 SV=1	7	6	77	6	803	92.4	4.84	150.09	cell organization and biogenesis;protein metabolism;other metabolic processes;stress response;transport;other biological processes	non-structural extracellular;plasma membrane;other membranes;cytosol;ER/Golgi;other cell component	signal transduction activity or receptor binding;nucleic acid binding activity;other molecular function	Pf00183, Pf02518	7184	HSP90B1	hsa:7184; P14625; Q96A97	ENSG00000166598	Photodynamic therapy-induced unfolded protein response; Focal adhesion: PI3K-Akt-mTOR-signaling pathway; Prion disease pathway; PI3K-Akt signaling pathway; Sudden infant death syndrome (SIDS) susceptibility pathways	Interleukin-4 and Interleukin-13 signaling; Regulation of Insulin-like Growth Factor (IGF) transport and uptake by Insulin-like Growth Factor Binding Proteins (IGFBPs); Post-translational protein phosphorylation; ATF6 (ATF6-alpha) activates chaperone genes; Trafficking and processing of endosomal TLR; Scavenging by Class A Receptors	240992	175867	208481	205337	198915	200653	178140	164366	210122	41528.6	52300.5	45138.6	54508.3	50854.7	71812	40274	54515.4	63050.3	High	High	High	High	High	High	High	High	High	High	High
High	O14979	Heterogeneous nuclear ribonucleoprotein D-like OS=Homo sapiens OX=9606 GN=HNRNPDL PE=1 SV=3	4	2	30	1	420	46.4	9.57	0	RNA metabolism OR transcription;other metabolic processes;other biological processes	cytosol;nucleus	nucleic acid binding activity	Pf00076	9987	HNRNPDL	hsa:9987; O14979; Q6SPF2; Q7KZ74; Q7KZ75; Q96IM0; Q96S43	ENSG00000152795		Gene and protein expression by JAK-STAT signaling after Interleukin-12 stimulation	15384.2	13098.6	13607.2	11685.6	16060.5	14002.6	11315.1	9935.96	12812.3	2650	3454.43	5775.36	3720.28	6174.01	3604.06	4829.01	6086.62	6022.27	Peak Found	Peak Found	Peak Found	Peak Found	High	Peak Found	High	Peak Found	High	Not Found	Peak Found
High	Q15648	Mediator of RNA polymerase II transcription subunit 1 OS=Homo sapiens OX=9606 GN=MED1 PE=1 SV=4	2	1	1	1	1581	168.4	8.73	2.22	cell cycle OR cell proliferation;cell organization and biogenesis;RNA metabolism OR transcription;other metabolic processes;transport;developmental processes;signal transduction;other biological processes	nucleus	signal transduction activity or receptor binding;nucleic acid binding activity;other molecular function	Pf10744	5469	MED1	A2RRQ6; hsa:5469; O43810; O75447; Q15648; Q6P9H7; Q6PK58; Q9HD39	ENSG00000125686	Energy metabolism; H19 action Rb-E2F1 signaling and CDK-Beta-catenin activity; Non-genomic actions of 1,25 dihydroxyvitamin D3	Heme signaling; Estrogen-dependent gene expression; Transcriptional activation of mitochondrial biogenesis; Cytoprotection by HMOX1; BMAL1:CLOCK,NPAS2 activates circadian gene expression; Transcriptional regulation of white adipocyte differentiation; Activation of gene expression by SREBF (SREBP); PPARA activates gene expression; Nuclear Receptor transcription pathway; RORA activates gene express…	1628.48	4163.5	3622.98	3428.76	7303.53	17454	3326.34	10507.5	9276.77	3544.84	2742.12	3403.16	3645.71	1927.52	1804.96	2491.92	2590.21	2089.29	Not Found	Not Found	Not Found	Not Found	Peak Found	Peak Found	Not Found	High	Peak Found	Not Found	Not Found
High	Q7RTV0	PHD finger-like domain-containing protein 5A OS=Homo sapiens OX=9606 GN=PHF5A PE=1 SV=1	14	1	20	1	110	12.4	8.41	52.39	RNA metabolism OR transcription;other metabolic processes;other biological processes	nucleus	nucleic acid binding activity;other molecular function	Pf03660	84844	PHF5A	hsa:84844; Q7RTV0; Q9UH06	ENSG00000100410	mRNA processing	mRNA Splicing - Major Pathway	133986	22097.7	43925.3	84953.5	9860.04	22151.1	101763	45931.3	37517.5	7723.72	3360.47	2246.42	6373.79	3161.72	5672.77	9337.09	1716.97	2558.64	High	High	High	High	High	High	High	High	High	High	Peak Found
High	Q92466	DNA damage-binding protein 2 OS=Homo sapiens OX=9606 GN=DDB2 PE=1 SV=1	2	1	21	1	427	47.8	9.47	25.41	protein metabolism;DNA metabolism;other metabolic processes;stress response;other biological processes	nucleus;other cell component	nucleic acid binding activity;other molecular function	Pf00400	1643	DDB2	B2R875; hsa:1643; Q76E54; Q76E55; Q76E56; Q76E57; Q92466	ENSG00000134574	miRNA regulation of DNA damage response; miRNA regulation of p53 pathway in prostate cancer; Endometrial cancer; Chromosomal and microsatellite instability in colorectal cancer ; Non-small cell lung cancer; Breast cancer pathway; Pancreatic adenocarcinoma pathway; Small cell lung cancer; Hepatitis B infection; Melanoma; Nucleotide excision repair; DNA repair pathways, full network; p53 transcript…	Ub-specific processing proteases; Neddylation; Formation of Incision Complex in GG-NER; DNA Damage Recognition in GG-NER; Dual Incision in GG-NER; TP53 Regulates Transcription of DNA Repair Genes	81576.8	53878.8	56064.1	53965.8	60486.3	61075.5	51601.2	72507.1	72687.8	17709.4	16594.9	14931	15310.4	15350.3	13440.2	12489.6	16489.5	17231.9	High	High	High	High	High	High	High	High	High	High	High
High	P61313	60S ribosomal protein L15 OS=Homo sapiens OX=9606 GN=RPL15 PE=1 SV=2	7	2	8	2	204	24.1	11.62	2.38	protein metabolism;other metabolic processes	other membranes;cytosol;translational apparatus;nucleus;other cell component	other molecular function	Pf00827	6138	RPL15	hsa:6138; P39030; P41051; P61313; Q5U0C0; Q642I1; Q6IPX6; Q8WYP2; Q96C44; Q9H2E5	ENSG00000174748	Cytoplasmic ribosomal proteins	L13a-mediated translational silencing of Ceruloplasmin expression; Formation of a pool of free 40S subunits; GTP hydrolysis and joining of the 60S ribosomal subunit; SRP-dependent cotranslational protein targeting to membrane; Regulation of expression of SLITs and ROBOs; Major pathway of rRNA processing in the nucleolus and cytosol; Nonsense Mediated Decay (NMD) enhanced by the Exon Junction Comp…	26227.8	30021.6	22340	23278.1	17996.9	4250.8	20117.8	16629.5	23696.2	6998.36	6629.87	5856.9	6089.31	4202.52	4528.54	5115.05	7671.11	4909.05	Peak Found	Peak Found	High	High	Peak Found	High	High	High	High	Not Found	Peak Found
High	P50579	Methionine aminopeptidase 2 OS=Homo sapiens OX=9606 GN=METAP2 PE=1 SV=1	2	1	4	1	478	52.9	5.82	8.02	protein metabolism;other metabolic processes	plasma membrane;other membranes;cytosol;other cell component	other molecular function	Pf00557	10988	METAP2	B2RDI8; B4DUX5; G3XA91; hsa:10988; P50579; Q8NB11	ENSG00000111142		Inactivation, recovery and regulation of the phototransduction cascade	14019.4	10524	9550.55	8270.19	9973	12320	6149.29	9018.63	8746.54	2946.47	3608.77	2153.85	2116.43	2782.58	2488.29	1748.84	2123.81	3505.67	High	Peak Found	Peak Found	Peak Found	Peak Found	Peak Found	High	High	High	Not Found	Not Found
High	Q99700	Ataxin-2 OS=Homo sapiens OX=9606 GN=ATXN2 PE=1 SV=2	1	1	20	1	1313	140.2	9.57	53.4	cell organization and biogenesis;RNA metabolism OR transcription;other metabolic processes;transport;other biological processes	cytosol;ER/Golgi;other cell component	signal transduction activity or receptor binding;other molecular function	Pf06741, Pf07145, Pf14438	6311	ATXN2	A6NLD4; hsa:6311; Q24JQ7; Q6ZQZ7; Q99493; Q99700	ENSG00000204842	Parkinson's disease pathway; EGF/EGFR signaling pathway		48904.9	36903.4	42455.6	71898.9	46756.6	106327	78292.3	42019.1	47337.5	10217.1	14835.8	19253.6	12598.2	18537.9	17816.1	13351.3	17443.1	23248.2	High	High	High	High	High	High	High	High	High	Peak Found	High
High	P62701	40S ribosomal protein S4, X isoform OS=Homo sapiens OX=9606 GN=RPS4X PE=1 SV=2	10	3	25	3	263	29.6	10.15	30.53	protein metabolism;other metabolic processes;other biological processes	cytosol;translational apparatus;nucleus;other cell component	nucleic acid binding activity;other molecular function	Pf00467, Pf00900, Pf01479, Pf08071, Pf16121	6191	RPS4X	hsa:6191; P12631; P12750; P27576; P55831; P62701; Q14727; Q6IPY4	ENSG00000198034	Cytoplasmic ribosomal proteins	L13a-mediated translational silencing of Ceruloplasmin expression; Translation initiation complex formation; Formation of a pool of free 40S subunits; Formation of the ternary complex, and subsequently, the 43S complex; Ribosomal scanning and start codon recognition; GTP hydrolysis and joining of the 60S ribosomal subunit; SRP-dependent cotranslational protein targeting to membrane; Regulation of…	3986.13	38473.3	34049.8	19857.9	39026.8	44993.8	24190.5	29141.6	68100.5	9499.97	6366.95	9501.84	2838.05	10619.7	9527.42	9710.31	10618	14584.5	High	High	High	High	High	Peak Found	High	Peak Found	High	High	High
High	P50914	60S ribosomal protein L14 OS=Homo sapiens OX=9606 GN=RPL14 PE=1 SV=4	5	1	7	1	215	23.4	10.93	15.37	protein metabolism;RNA metabolism OR transcription;other metabolic processes;other biological processes	cytosol;translational apparatus;other cell component	other molecular function	Pf01929	9045	RPL14	hsa:9045; P50914; Q45RF0; Q53G20; Q8TBD5; Q8WUT0; Q92579; Q96GR0; Q9BSB8; Q9BW65; Q9BYF6	ENSG00000188846	Cytoplasmic ribosomal proteins	Regulation of expression of SLITs and ROBOs; Nonsense Mediated Decay (NMD) enhanced by the Exon Junction Complex (EJC); L13a-mediated translational silencing of Ceruloplasmin expression; Formation of a pool of free 40S subunits; GTP hydrolysis and joining of the 60S ribosomal subunit; Major pathway of rRNA processing in the nucleolus and cytosol; SRP-dependent cotranslational protein targeting to…	48149.9	36881.6	34596.9	41435.3	32277.1	32950.2	29726.4	32538.2	35830.7	9599.38	11619.3	9221.47	14321	7927.39	8006.5	8250.85	10252.4	6316.23	Peak Found	Peak Found	High	High	Peak Found	High	High	Peak Found	High	Peak Found	Peak Found
High	O60563	Cyclin-T1 OS=Homo sapiens OX=9606 GN=CCNT1 PE=1 SV=1	5	2	5	2	726	80.6	8.78	11.07	cell cycle OR cell proliferation;protein metabolism;RNA metabolism OR transcription;other metabolic processes;other biological processes	cytosol;nucleus	enzyme regulator activity;nucleic acid binding activity;other molecular function	Pf00134	904	CCNT1	A9XU13; E7EX76; hsa:904; O60563; O60581	ENSG00000129315	Initiation of transcription and translation elongation at the HIV-1 LTR; Male infertility	Formation of RNA Pol II elongation complex ; Formation of HIV elongation complex in the absence of HIV Tat; Formation of HIV-1 elongation complex containing HIV-1 Tat; Pausing and recovery of Tat-mediated HIV elongation; Tat-mediated HIV elongation arrest and recovery; HIV elongation arrest and recovery; Pausing and recovery of HIV elongation; RNA Polymerase II Pre-transcription Events; TP53 Regu…	11257	21365.6	17633.6	26142.7	30860.6	4484.52	28063.7	23099.3	21335.2	7160.99	4778.86	6739.32	6310.69	6381.96	4737.81	7847.69	5591.85	3540.5	Peak Found	Peak Found	Peak Found	High	Peak Found	Not Found	High	High	Peak Found	Not Found	Not Found
High	P10809	60 kDa heat shock protein, mitochondrial OS=Homo sapiens OX=9606 GN=HSPD1 PE=1 SV=2	9	5	50	5	573	61	5.87	106.39	cell cycle OR cell proliferation;cell organization and biogenesis;protein metabolism;DNA metabolism;other metabolic processes;stress response;transport;developmental processes;signal transduction;other biological processes	non-structural extracellular;plasma membrane;other membranes;cytosol;cytoskeleton;mitochondrion;other cytoplasmic organelle;other cell component	nucleic acid binding activity;other molecular function	Pf00118	3329	HSPD1	B2R5M6; B7Z712; hsa:3329; P10809; Q38L19; Q9UCR6	ENSG00000144381	Apoptosis-related network due to altered Notch3 in ovarian cancer; Sudden infant death syndrome (SIDS) susceptibility pathways	Mitochondrial protein import; TFAP2A acts as a transcriptional repressor during retinoic acid induced cell differentiation	257090	503115	326761	234011	333908	472716	304311	278259	308235	74817.4	87402.3	77702	67892.7	89587	79418.7	68899.5	94281.2	85577.7	High	High	High	High	High	High	High	High	High	High	High
High	P62917	60S ribosomal protein L8 OS=Homo sapiens OX=9606 GN=RPL8 PE=1 SV=2	7	2	43	2	257	28	11.03	64.96	protein metabolism;other metabolic processes	cytosol;translational apparatus;other cell component	nucleic acid binding activity;other molecular function	Pf00181, Pf03947	6132	RPL8	A8K094; D3DWN2; hsa:6132; P25120; P62917; Q567Q7; Q969V7; Q9BWQ9	ENSG00000161016	Cytoplasmic ribosomal proteins	Regulation of expression of SLITs and ROBOs; Nonsense Mediated Decay (NMD) enhanced by the Exon Junction Complex (EJC); L13a-mediated translational silencing of Ceruloplasmin expression; Formation of a pool of free 40S subunits; GTP hydrolysis and joining of the 60S ribosomal subunit; Major pathway of rRNA processing in the nucleolus and cytosol; SRP-dependent cotranslational protein targeting to…	117398	153363	163235	97000.6	133794	155279	79374.5	120394	127150	29619.3	23616.2	26770.5	31512.2	31796.3	36807.1	25365.6	46258.6	45404.5	High	High	High	High	High	High	High	High	High	High	High
High	P30086	Phosphatidylethanolamine-binding protein 1 OS=Homo sapiens OX=9606 GN=PEBP1 PE=1 SV=3	4	1	4	1	187	21	7.53	1.69	other biological processes	cytosol	enzyme regulator activity;other molecular function	Pf01161	5037	PEBP1	B2R4S1; hsa:5037; P30086	ENSG00000089220	Pancreatic adenocarcinoma pathway; EGF/EGFR signaling pathway	Signaling by BRAF and RAF1 fusions; Signaling by moderate kinase activity BRAF mutants; Paradoxical activation of RAF signaling by kinase inactive BRAF; Signaling downstream of RAS mutants; MAP2K and MAPK activation; Signaling by high-kinase activity BRAF mutants; Negative regulation of MAPK pathway	9546.72	11533.6	13983.8	7393.69	16345	12674.2	8667.56	12702.5	12048.6	2964.23	3694.87	3540.74	2901.76	1686.55	4147.83	2794.34	1445.05	3969.04	Peak Found	Peak Found	High	Peak Found	High	Peak Found	Peak Found	High	High	Not Found	Peak Found
High	P48643	T-complex protein 1 subunit epsilon OS=Homo sapiens OX=9606 GN=CCT5 PE=1 SV=1	2	1	6	1	541	59.6	5.66	12.47	transport;other biological processes	cytosol;cytoskeleton;other cell component	cytoskeletal activity;nucleic acid binding activity;other molecular function	Pf00118	22948	CCT5	A8JZY8; A8K2X8; B4DYD8; hsa:22948; P48643	ENSG00000150753	16p11.2 proximal deletion syndrome	Formation of tubulin folding intermediates by CCT/TriC; Association of TriC/CCT with target proteins during biosynthesis; Cooperation of PDCL (PhLP1) and TRiC/CCT in G-protein beta folding; Prefoldin mediated transfer of substrate to CCT/TriC; Folding of actin by CCT/TriC; BBSome-mediated cargo-targeting to cilium	33778.4	25865	32868.2	32164.9	22014.8	23982.3	38663	25788.9	36155.3	4355.21	4047.97	2549.03	5042.46	5922.44	5420.45	3345.51	8418.93	5574.2	High	High	High	Peak Found	High	Peak Found	High	High	Peak Found	Peak Found	Peak Found
High	P62847	40S ribosomal protein S24 OS=Homo sapiens OX=9606 GN=RPS24 PE=1 SV=1	11	2	6	1	133	15.4	10.78	9.13	protein metabolism;RNA metabolism OR transcription;other metabolic processes;other biological processes	cytosol;ER/Golgi;translational apparatus;nucleus;other cell component	other molecular function	Pf01282	6229	RPS24	E7EPK6; hsa:6229; P16632; P62847; Q5T0P7; Q5T0P8; Q7Z3D1	ENSG00000138326	Cytoplasmic ribosomal proteins	Regulation of expression of SLITs and ROBOs; Nonsense Mediated Decay (NMD) enhanced by the Exon Junction Complex (EJC); L13a-mediated translational silencing of Ceruloplasmin expression; Formation of a pool of free 40S subunits; GTP hydrolysis and joining of the 60S ribosomal subunit; Major pathway of rRNA processing in the nucleolus and cytosol; SRP-dependent cotranslational protein targeting to…	13288.4	17507.7	15893.8	22937.6	21323.8	32395.8	18938.9	21097.8	24974.9	3731.01	4577.58	5395.86	3614.52	7160.79	5179.36	2386.69	5569.18	3264.29	Peak Found	Peak Found	Peak Found	Peak Found	High	High	High	Peak Found	Peak Found	Peak Found	Peak Found
High	P62280	40S ribosomal protein S11 OS=Homo sapiens OX=9606 GN=RPS11 PE=1 SV=3	21	4	64	4	158	18.4	10.3	109.51	protein metabolism;other metabolic processes	cytosol;translational apparatus;nucleus	nucleic acid binding activity;other molecular function	Pf00366, Pf16205	6205	RPS11	B2R4F5; hsa:6205; P04643; P62280; Q498Y6; Q6IRY0	ENSG00000142534	VEGFA-VEGFR2 signaling pathway; IL-18 signaling pathway; Cytoplasmic ribosomal proteins	Regulation of expression of SLITs and ROBOs; Nonsense Mediated Decay (NMD) enhanced by the Exon Junction Complex (EJC); L13a-mediated translational silencing of Ceruloplasmin expression; Formation of a pool of free 40S subunits; GTP hydrolysis and joining of the 60S ribosomal subunit; Major pathway of rRNA processing in the nucleolus and cytosol; SRP-dependent cotranslational protein targeting to…	190847	181947	192383	178038	142741	228821	221112	177484	263236	40058.7	27835.3	36388.3	36539.1	39918.6	60031.9	37791.6	54330.1	46392.9	High	High	High	High	High	High	High	High	High	High	High
High	O76021	Ribosomal L1 domain-containing protein 1 OS=Homo sapiens OX=9606 GN=RSL1D1 PE=1 SV=3	2	1	2	1	490	54.9	10.13	4.62	RNA metabolism OR transcription;other metabolic processes;other biological processes	nucleus;other cell component	nucleic acid binding activity	Pf00687	26156	RSL1D1	B4DJ58; D3DUG7; hsa:26156; O76021; Q2M1T7; Q6PL22; Q8IWS7; Q8WUZ1; Q9HDA9; Q9Y3Z9	ENSG00000171490			10795.4	6544.3	1610.49	10384	9237.62	2908.1	10516.9	7865.21	13137.9	4082.48	3423.61	2297.75	1560.85	2054.1	2223.85	1685.86	1995.68	2979.33	Peak Found	Peak Found	Not Found	Peak Found	Peak Found	High	Peak Found	High	Peak Found	Not Found	Not Found
High	P26373	60S ribosomal protein L13 OS=Homo sapiens OX=9606 GN=RPL13 PE=1 SV=4	9	2	25	2	211	24.2	11.65	26.78	protein metabolism;other metabolic processes;developmental processes	cytosol;ER/Golgi;translational apparatus;nucleus;other cell component	other molecular function	Pf01294	6137	RPL13	B4DLX3; F5H1S2; hsa:6137; P26373; Q3KQT8; Q567Q8; Q9BPX0	ENSG00000167526	Cytoplasmic ribosomal proteins	Regulation of expression of SLITs and ROBOs; Nonsense Mediated Decay (NMD) enhanced by the Exon Junction Complex (EJC); L13a-mediated translational silencing of Ceruloplasmin expression; Formation of a pool of free 40S subunits; GTP hydrolysis and joining of the 60S ribosomal subunit; Major pathway of rRNA processing in the nucleolus and cytosol; SRP-dependent cotranslational protein targeting to…	73924.4	43253.6	57149.8	41095.2	38001.4	40151.9	66671.9	72073	52575.5	8053.06	11996.2	9904.7	7769.44	9497.98	8855.95	7312.63	9427.23	9178.07	High	Peak Found	High	High	High	High	High	High	High	High	High
High	Q15942	Zyxin OS=Homo sapiens OX=9606 GN=ZYX PE=1 SV=1	7	3	17	3	572	61.2	6.67	23.7	cell adhesion;cell-cell signaling;cell organization and biogenesis;stress response;signal transduction;other biological processes	plasma membrane;other membranes;cytosol;cytoskeleton;nucleus;other cell component	other molecular function	Pf00412	7791	ZYX	A4D2G6; B4DQX7; hsa:7791; Q15942; Q6I9S4	ENSG00000159840; ENSG00000285443	Integrin-mediated cell adhesion; Focal adhesion		41154.8	52808.4	65056.9	43453.4	49477	58335.7	56199.9	48877	45726.4	8372.34	8723.88	10325	10554.5	16831	9600.05	9563.8	9432.36	8529.92	Peak Found	High	High	High	High	High	High	High	High	Peak Found	Not Found
High	Q96D71	RalBP1-associated Eps domain-containing protein 1 OS=Homo sapiens OX=9606 GN=REPS1 PE=1 SV=3	3	1	19	1	796	86.6	5.69	29.1	transport	plasma membrane;other membranes;cytosol	other molecular function	Pf12763	85021	REPS1	B7ZBZ8; B7ZBZ9; B7ZC00; hsa:85021; J3KP76; Q5JWJ5; Q5JWJ6; Q5JWJ7; Q8NDR7; Q8WU62; Q96D71; Q9BXY9	ENSG00000135597		Cargo recognition for clathrin-mediated endocytosis	1691.03	27251	34158	1715.35	37319.5	31701.6	1803.12	30829.7	36108.9	2801	5405.46	7303.77	3956.26	9468.4	6673.36	2900.73	7579.32	9820.44	Not Found	High	High	High	High	High	Not Found	High	High	Not Found	High
High	P83881	60S ribosomal protein L36a OS=Homo sapiens OX=9606 GN=RPL36A PE=1 SV=2	26	3	19	3	106	12.4	10.58	25.6	protein metabolism;other metabolic processes	plasma membrane;other membranes;cytosol;ER/Golgi;translational apparatus	other molecular function	Pf00935	6173	RPL36A	hsa:6173; P09896; P10661; P83881; Q08ES5; Q5J9I6	ENSG00000241343	Cytoplasmic ribosomal proteins	L13a-mediated translational silencing of Ceruloplasmin expression; Formation of a pool of free 40S subunits; GTP hydrolysis and joining of the 60S ribosomal subunit; SRP-dependent cotranslational protein targeting to membrane; Regulation of expression of SLITs and ROBOs; Major pathway of rRNA processing in the nucleolus and cytosol; Nonsense Mediated Decay (NMD) enhanced by the Exon Junction Comp…	41099.8	46259.7	46787.6	28211.5	53280.3	72664.6	33994.9	49418.5	40592.8	4492.05	5751.1	7451.34	7561.34	18829.9	11189.6	7477.3	16034.5	14766.1	Peak Found	High	High	High	High	High	High	High	High	Not Found	Peak Found
High	Q14847	LIM and SH3 domain protein 1 OS=Homo sapiens OX=9606 GN=LASP1 PE=1 SV=2	22	5	25	5	261	29.7	7.05	44.52	transport	cytoskeleton;other cell component	transporter activity;cytoskeletal activity;other molecular function	Pf00412, Pf00880, Pf14604	3927	LASP1	B4DGQ0; hsa:3927; Q14847; Q96ED2; Q96IG0	ENSG00000002834			104559	54781	52301.7	195906	62392.3	54681.1	85425.4	40762.5	44903.6	67649.6	8888.93	9241.15	63703.1	12139.5	9912.18	35073.1	8186.02	9642.09	High	High	High	High	High	High	High	High	High	High	Peak Found
High	Q9NYF8	Bcl-2-associated transcription factor 1 OS=Homo sapiens OX=9606 GN=BCLAF1 PE=1 SV=2	1	1	17	1	920	106.1	9.98	28.98	stress response;other biological processes	nucleus;other cell component	nucleic acid binding activity;other molecular function	Pf15440	9774	BCLAF1	A2RU75; B7ZM58; E1P586; hsa:9774; Q14673; Q86WU6; Q86WY0; Q9NYF8	ENSG00000029363	Interactome of polycomb repressive complex 2 (PRC2)		25740.1	40001	45247.3	24241.6	41224.3	45698	24555.9	24809.8	33338.1	1840.57	7155.21	8744.91	2748.1	7810.5	7733.26	5849.45	15606.5	7364.08	High	High	High	High	High	High	High	High	High	Not Found	High
High	P00338	L-lactate dehydrogenase A chain OS=Homo sapiens OX=9606 GN=LDHA PE=1 SV=2	11	4	22	4	332	36.7	8.27	37.72	other metabolic processes	cytosol;other cell component	other molecular function	Pf00056, Pf02866	3939	LDHA	B4DKQ2; B7Z5E3; D3DQY3; F8W819; hsa:3939; P00338; Q53G53; Q6IBM7; Q6ZNV1; Q9UDE8; Q9UDE9	ENSG00000134333; ENSG00000288299	Cori cycle; HIF1A and PPARG regulation of glycolysis; Photodynamic therapy-induced HIF-1 survival signaling; VEGFA-VEGFR2 signaling pathway; Amino acid metabolism; Clear cell renal cell carcinoma pathways; PI3K/AKT/mTOR - vitamin D3 signaling; Metabolic reprogramming in colon cancer; Aerobic glycolysis; Glycolysis in senescence; Orexin receptor pathway; CCL18 signaling pathway; Glucose metabolism…	Pyruvate metabolism	113685	102763	37303	86100.1	120066	17808.4	168613	75975.2	27785	15511.1	11959.8	14655	15774.4	16334.4	11103.6	14842.2	15522.3	11507.6	High	High	High	High	High	High	High	High	High	Peak Found	Peak Found
High	Q96EV2	RNA-binding protein 33 OS=Homo sapiens OX=9606 GN=RBM33 PE=1 SV=3	3	2	8	2	1170	129.9	6.93	11.63					155435	RBM33	A4D244; B5MC24; hsa:155435; Q52LF5; Q75LN9; Q75ML5; Q96EV2; Q9NSV0	ENSG00000184863			28309.4	37998.4	30057.9	23307	29515.3	41655	28596.5	35003	33019.1	5994.63	4350.31	5656.91	5251.07	4926.85	5666.98	5437.19	5492.98	6780.19	High	High	High	Peak Found	Peak Found	Peak Found	High	High	High	Not Found	Not Found
High	O14531	Dihydropyrimidinase-related protein 4 OS=Homo sapiens OX=9606 GN=DPYSL4 PE=1 SV=2	2	1	6	1	572	61.8	7.09	10.8	cell organization and biogenesis;developmental processes;other biological processes	cytosol	cytoskeletal activity;other molecular function	Pf01979	10570	DPYSL4	B2RMQ1; D3DRG5; hsa:10570; O00240; O14531; Q5T0Q7	ENSG00000151640		CRMPs in Sema3A signaling	10612.6	32822.7	12466.8	34385.5	18136.2	18040.5	11539	16669.9	16158.2	1938.61	1525.35	4068.4	3061.12	2921.21	3336.78	3666.78	2401.34	4128.73	High	High	High	Peak Found	High	Peak Found	Peak Found	High	High	Not Found	Not Found
High	Q5SW79	Centrosomal protein of 170 kDa OS=Homo sapiens OX=9606 GN=CEP170 PE=1 SV=1	1	1	6	1	1584	175.2	7.11	15.96		cytosol;cytoskeleton;other cell component		Pf00498, Pf15308	9859	CEP170	hsa:9859; O75058; Q5SW77; Q5SW78; Q5SW79; Q7LGA9; Q86W31; Q9UQ08; Q9UQ09	ENSG00000143702; ENSG00000276725	Ciliary landscape		12199.1	12964.2	12394.4	9279.31	25698.6	16704.2	10608.2	8914.79	15322.1	3258.87	2739.31	2411.6	3945.38	2714.13	2274.26	3376.75	1638.52	1565.31	High	High	Peak Found	Peak Found	High	High	Peak Found	High	High	Not Found	Not Found
High	Q15293	Reticulocalbin-1 OS=Homo sapiens OX=9606 GN=RCN1 PE=1 SV=1	2	1	1	1	331	38.9	5	1.6	developmental processes	ER/Golgi	other molecular function	Pf13202	5954	RCN1	B7Z1M1; D3DR00; hsa:5954; Q15293	ENSG00000049449	VEGFA-VEGFR2 signaling pathway	Regulation of Insulin-like Growth Factor (IGF) transport and uptake by Insulin-like Growth Factor Binding Proteins (IGFBPs); Post-translational protein phosphorylation	17107.7	16943.9	23299.2	13920.5	18254.6	16523.4	8103.35	16872.7	14261.5	3589.82	3002.29	4054.39	2481.26	3590.1	2554.96	3242.97	2825.76	3137.41	Peak Found	Peak Found	Peak Found	Peak Found	Peak Found	Peak Found	Peak Found	High	Peak Found	Not Found	Peak Found
High	Q8NC51	Plasminogen activator inhibitor 1 RNA-binding protein OS=Homo sapiens OX=9606 GN=SERBP1 PE=1 SV=2	19	7	91	7	408	44.9	8.65	226.05	cell organization and biogenesis;other biological processes	cytosol;nucleus;other cell component	translation activity;nucleic acid binding activity;other molecular function	Pf04774, Pf16174	26135	SERBP1	hsa:26135; Q5VU19; Q5VU20; Q5VU22; Q8NC51; Q8WUH0; Q96SE2; Q9BTY3; Q9BUM4; Q9Y367; Q9Y4S3	ENSG00000142864	Apoptosis-related network due to altered Notch3 in ovarian cancer		477985	603507	591966	750988	677708	717003	714429	492815	518255	101258	111963	104429	130426	107145	90541.2	80578.6	105992	104620	High	High	High	High	High	High	High	High	High	High	High
High	P22234	Multifunctional protein ADE2 OS=Homo sapiens OX=9606 GN=PAICS PE=1 SV=3	9	3	16	3	425	47	7.23	37.02	other metabolic processes	cytosol;other cell component	other molecular function	Pf00731, Pf01259	10606	PAICS	E9PDH9; hsa:10606; P22234; Q68CQ5	ENSG00000128050	Metabolic reprogramming in colon cancer	Purine ribonucleoside monophosphate biosynthesis	44147.7	35314.1	31306.4	35159.1	42725.7	28554	69569.7	25272.4	28945.7	6056.89	5202.61	4558.72	5160.24	7192.97	4984.27	5820.29	5320.08	5742.45	High	High	High	High	High	High	High	High	High	Peak Found	Not Found
High	Q13435	Splicing factor 3B subunit 2 OS=Homo sapiens OX=9606 GN=SF3B2 PE=1 SV=2	2	2	15	2	895	100.2	5.67	23.5	RNA metabolism OR transcription;other metabolic processes	nucleus		Pf02037, Pf04037, Pf04046	10992	SF3B2	A8K485; B4DT19; hsa:10992; Q13435; Q7L4T5; Q7Z627; Q969K1; Q96CM6; Q9BWD2	ENSG00000087365	mRNA processing	mRNA Splicing - Major Pathway; mRNA Splicing - Minor Pathway	52154.1	53969.8	50492.2	42093.7	57180.8	44812.7	40333.7	41413.5	49378.7	6739.51	4796.42	4296.72	6523.91	7252.67	5939.26	5902.55	5313.11	5194.03	High	High	High	High	High	High	High	High	High	Not Found	Peak Found
High	P10606	Cytochrome c oxidase subunit 5B, mitochondrial OS=Homo sapiens OX=9606 GN=COX5B PE=1 SV=2	9	1	14	1	129	13.7	8.81	32.53	other metabolic processes;transport;other biological processes	other membranes;mitochondrion	transporter activity;other molecular function	Pf01215	1329	COX5B	hsa:1329; P10606; Q53YB7; Q96J18; Q99610	ENSG00000135940	Electron transport chain: OXPHOS system in mitochondria; Nonalcoholic fatty liver disease; Mitochondrial complex IV assembly	Respiratory electron transport; Cytoprotection by HMOX1; TP53 Regulates Metabolic Genes	16611.8	17682.7	22438.3	20669.2	18438.8	18978.8	35267.1	14177.5	18375	2232.63	2621.45	3254.95	3593.6	1845.29	2665.42	2276.35	1870.97	3487.69	High	High	High	High	High	High	High	High	High	Not Found	Not Found
High	P12532	Creatine kinase U-type, mitochondrial OS=Homo sapiens OX=9606 GN=CKMT1A PE=1 SV=1	13	5	60	5	417	47	8.34	71.5	other metabolic processes	other membranes;mitochondrion	kinase activity;other molecular function	Pf00217, Pf02807	1159; 548596	CKMT1A; CKMT1B	B4DIT8; B7ZA09; hsa:1159; hsa:548596; P12532; Q0VAM3; Q32NF6; Q53FC4	ENSG00000223572; ENSG00000237289		Creatine metabolism	206392	158259	225718	290658	179079	234350	265569	235075	224143	29365.4	34467.5	38413.3	32181	32626.6	30726.9	33202.5	33019.1	38429.8	High	High	High	High	High	High	High	High	High	Peak Found	High
High	P29401	Transketolase OS=Homo sapiens OX=9606 GN=TKT PE=1 SV=3	33	19	312	19	623	67.8	7.66	535.59	other metabolic processes;other biological processes	other membranes;cytosol;ER/Golgi;nucleus;other cytoplasmic organelle	other molecular function	Pf00456, Pf02779, Pf02780	7086	TKT	A8K089; B4DE31; E7EPA7; hsa:7086; P29401; Q8TBA3; Q96HH3	ENSG00000163931	Pentose phosphate metabolism; VEGFA-VEGFR2 signaling pathway; Metabolic reprogramming in colon cancer; Thiamine metabolic pathways	Nuclear events mediated by NFE2L2; Pentose phosphate pathway; Insulin effects increased synthesis of Xylulose-5-Phosphate	2.11264e+06	1.48682e+06	1.62021e+06	1.80404e+06	1.71193e+06	1.85293e+06	1.77583e+06	1.59726e+06	1.78921e+06	231244	185867	271717	265347	246734	245802	236277	223707	238969	High	High	High	High	High	High	High	High	High	High	High
High	Q15233	Non-POU domain-containing octamer-binding protein OS=Homo sapiens OX=9606 GN=NONO PE=1 SV=4	8	4	99	4	471	54.2	8.95	163.4	DNA metabolism;RNA metabolism OR transcription;other metabolic processes;stress response;other biological processes	nucleus;other cell component	nucleic acid binding activity;other molecular function	Pf00076, Pf08075	4841	NONO	B7Z4C2; D3DVV4; F5GYZ3; hsa:4841; O00201; P30807; Q12786; Q15233; Q9BQC5	ENSG00000147140	mRNA processing		360607	363982	312545	341903	564700	298157	327772	439346	440932	36877.8	31777.5	42995.2	53308.9	46708.8	33400.3	22926.9	36556.7	35381.1	High	High	High	High	High	High	High	High	High	High	High
High	Q9NYU2	UDP-glucose:glycoprotein glucosyltransferase 1 OS=Homo sapiens OX=9606 GN=UGGT1 PE=1 SV=3	1	1	9	1	1555	177.1	5.63	16.02	protein metabolism;other metabolic processes;stress response;other biological processes	ER/Golgi;other cell component	other molecular function	Pf06427, Pf18400, Pf18401, Pf18402, Pf18403, Pf18404	56886	UGGT1	hsa:56886; Q53QP2; Q53SL3; Q8IW30; Q9H8I4; Q9NYU2	ENSG00000136731	IL-18 signaling pathway	ER Quality Control Compartment (ERQC)	35514.9	19913.9	28118.5	25074.6	20431.6	22944.2	25743.7	24736	25744.1	2297.14	3605.74	1657.51	3080.99	3296.99	2863.93	3117.19	2993.74	1888.86	High	Peak Found	High	High	High	High	High	High	High	Not Found	Not Found
High	P46778	60S ribosomal protein L21 OS=Homo sapiens OX=9606 GN=RPL21 PE=1 SV=2	6	2	12	2	160	18.6	10.49	14.18	protein metabolism;other metabolic processes	cytosol;ER/Golgi;translational apparatus;other cell component	other molecular function	Pf01157	6144	RPL21	hsa:6144; P46778; Q16699	ENSG00000122026	Cytoplasmic ribosomal proteins	L13a-mediated translational silencing of Ceruloplasmin expression; Formation of a pool of free 40S subunits; GTP hydrolysis and joining of the 60S ribosomal subunit; SRP-dependent cotranslational protein targeting to membrane; Regulation of expression of SLITs and ROBOs; Major pathway of rRNA processing in the nucleolus and cytosol; Nonsense Mediated Decay (NMD) enhanced by the Exon Junction Comp…	67944.1	54292.1	66375.6	47783.4	55291.5	61560.8	50963.4	50612.5	40318.9	5956.58	7432.69	7669.7	6458.9	13818.7	7156.03	6067.66	8237.71	6918.23	High	High	High	High	High	High	High	High	High	Not Found	Peak Found
High	Q7Z417	Nuclear fragile X mental retardation-interacting protein 2 OS=Homo sapiens OX=9606 GN=NUFIP2 PE=1 SV=1	10	7	20	7	695	76.1	8.7	22.27		cytosol;translational apparatus;nucleus;other cell component	nucleic acid binding activity	Pf15293	57532	NUFIP2	A1L3A6; A1L3A7; hsa:57532; Q7Z417; Q9P2M5	ENSG00000108256			96914.3	95841.6	85695.9	123751	141372	134495	72752.1	88000.6	103346	18872	13485.3	16746.6	19356.4	16581.5	16073.4	16106.7	17028.4	14230.8	High	High	High	High	High	High	High	Peak Found	High	Not Found	Not Found
High	Q8TAF3	WD repeat-containing protein 48 OS=Homo sapiens OX=9606 GN=WDR48 PE=1 SV=1	1	1	23	1	677	76.2	7.03	41.86	protein metabolism;DNA metabolism;other metabolic processes;stress response;developmental processes;other biological processes	cytosol;nucleus;other cytoplasmic organelle;other cell component	nucleic acid binding activity;other molecular function	Pf00400, Pf11816	57599	WDR48	B4DM86; B4DQI2; B4DY84; hsa:57599; Q63HJ2; Q658Y1; Q8N3Z1; Q8TAF3; Q9NSK8; Q9P279	ENSG00000114742	DNA repair pathways, full network	Ub-specific processing proteases; Fanconi Anemia Pathway; Recognition of DNA damage by PCNA-containing replication complex; Signaling by cytosolic PDGFRA and PDGFRB fusion proteins	84940.4	96860.9	79017.5	139624	82219.2	66780.7	88672.2	65613.8	81340.5	9757.79	6146.04	5827.34	10384	9970.65	8208.72	7718.97	7124.7	8362.93	High	High	High	High	High	High	High	High	High	Peak Found	Peak Found
High	Q15424	Scaffold attachment factor B1 OS=Homo sapiens OX=9606 GN=SAFB PE=1 SV=4	4	4	37	4	915	102.6	5.47	64.64	cell organization and biogenesis;signal transduction;other biological processes	nucleus;other cell component	nucleic acid binding activity;other molecular function	Pf00076, Pf02037	6294	SAFB	A0AV56; B7Z5B6; B7ZLP6; F5H0H3; hsa:6294; O60406; Q15424; Q59HH8	ENSG00000160633	Interleukin-1 (IL-1) structural pathway	SUMOylation of transcription cofactors	111400	136016	176018	168780	176411	143751	110906	197852	185414	14237.6	18727.3	19536.8	14463.5	25683.7	19817.5	14945	22102	18087.1	High	High	High	High	High	High	High	High	High	Peak Found	Peak Found
High	P27816	Microtubule-associated protein 4 OS=Homo sapiens OX=9606 GN=MAP4 PE=1 SV=3	3	2	25	2	1152	120.9	5.43	56.41	cell cycle OR cell proliferation;cell organization and biogenesis;developmental processes;other biological processes	cytoskeleton;other cell component	cytoskeletal activity;other molecular function	Pf00418	4134	MAP4	hsa:4134; P27816; Q13082; Q59FT2; Q68D74; Q6ZUW9; Q86V26; Q96A76; Q96NS9	ENSG00000047849	Splicing factor NOVA regulated synaptic proteins; 2q37 copy number variation syndrome		55905.7	74511.6	54736.3	59922.6	67580.2	59008.3	37462.5	49348.4	52762.7	6912.8	4678.82	6034.54	6862.68	7621.13	4655.44	5941.81	6465.28	5583.24	High	High	High	High	High	High	High	High	High	Not Found	Peak Found
High	Q13595	Transformer-2 protein homolog alpha OS=Homo sapiens OX=9606 GN=TRA2A PE=1 SV=1	4	1	9	1	282	32.7	11.27	19.71	RNA metabolism OR transcription;other metabolic processes;other biological processes	nucleus;other cell component		Pf00076	29896	TRA2A	B4DQI6; B4DUA9; E9PD75; hsa:29896; Q13595	ENSG00000164548	Orexin receptor pathway		35038.2	16827	24064.7	17821.6	20869.8	23199.1	18132.5	38214.5	20126.4	2309.52	1459.76	3573.64	2784.84	2330.91	1837.49	3895.01	3987.72	3507.71	Peak Found	High	High	High	High	High	High	High	High	Not Found	Not Found
High	Q8WW12	PEST proteolytic signal-containing nuclear protein OS=Homo sapiens OX=9606 GN=PCNP PE=1 SV=2	7	1	10	1	178	18.9	7.49	23.14	cell cycle OR cell proliferation;protein metabolism;other metabolic processes	nucleus		Pf15473	57092	PCNP	B2RBE7; D3DN52; hsa:57092; Q53GF3; Q6AI44; Q8WW12; Q96CU3; Q9NS81	ENSG00000081154			16328.3	26153.5	24720.6	18694.2	31073.2	31145.3	22989.8	18864.4	36737.1	3466.32	2451.55	3213.13	4343.35	3470.42	3072.11	2441.94	5026.23	3488.53	High	Peak Found	High	High	High	High	High	High	High	Not Found	Peak Found
High	Q6PKG0	La-related protein 1 OS=Homo sapiens OX=9606 GN=LARP1 PE=1 SV=2	2	3	25	3	1096	123.4	8.82	32.93	cell cycle OR cell proliferation;protein metabolism;other metabolic processes;stress response;signal transduction;other biological processes	cytosol;other cell component	translation activity;nucleic acid binding activity;other molecular function	Pf05383	23367	LARP1	hsa:23367; O94836; Q6PKG0; Q8N4M2; Q8NB73; Q9UFD7	ENSG00000155506	SARS-CoV-2 innate immunity evasion and cell-specific immune response; Network map of SARS-CoV-2 signaling pathway	SARS-CoV-2 activates/modulates innate and adaptive immune responses	13034.3	20806.9	19377.5	10270.3	18351.1	15951.3	11519.9	15662.6	15367.2	2738.46	3778.81	3701.99	3554.77	1707.07	1497.65	3285.65	3962.1	3529.14	High	High	High	High	High	High	High	High	Peak Found	High	High
High	P61254	60S ribosomal protein L26 OS=Homo sapiens OX=9606 GN=RPL26 PE=1 SV=1	51	8	103	8	145	17.2	10.55	172.84	cell cycle OR cell proliferation;protein metabolism;RNA metabolism OR transcription;other metabolic processes;stress response;signal transduction;other biological processes	cytosol;translational apparatus;nucleus;other cell component	nucleic acid binding activity;other molecular function	Pf00467, Pf16906	6154	RPL26	B2R4F0; D3DTR8; hsa:6154; P61254; Q02877; Q6IPY2	ENSG00000161970	VEGFA-VEGFR2 signaling pathway; Cytoplasmic ribosomal proteins	L13a-mediated translational silencing of Ceruloplasmin expression; Formation of a pool of free 40S subunits; GTP hydrolysis and joining of the 60S ribosomal subunit; SRP-dependent cotranslational protein targeting to membrane; Regulation of expression of SLITs and ROBOs; Major pathway of rRNA processing in the nucleolus and cytosol; Nonsense Mediated Decay (NMD) enhanced by the Exon Junction Comp…	223104	302131	247893	231950	207342	271289	260340	281446	326412	28098.5	32926.5	28598.6	23926	30829.6	23084.5	43399.1	29742.6	31361.2	High	High	High	High	High	High	High	High	High	High	High
High	P07195	L-lactate dehydrogenase B chain OS=Homo sapiens OX=9606 GN=LDHB PE=1 SV=2	9	2	26	2	334	36.6	6.05	50.3	other metabolic processes	other membranes;cytosol;mitochondrion;other cell component	other molecular function	Pf00056, Pf02866	3945	LDHB	hsa:3945; P07195	ENSG00000111716	Clear cell renal cell carcinoma pathways; CCL18 signaling pathway; Glycolysis and gluconeogenesis	Pyruvate metabolism	76288.1	61832	72143.8	114361	47626.6	25972.4	89098.8	60531.8	88489.8	5898.22	4419.9	5804.94	6219.5	4800.86	4051.48	6240.73	7327.51	7146.65	High	High	High	High	High	High	High	High	High	Not Found	Not Found
High	P62424	60S ribosomal protein L7a OS=Homo sapiens OX=9606 GN=RPL7A PE=1 SV=2	12	4	41	4	266	30	10.61	82.04	protein metabolism;RNA metabolism OR transcription;other metabolic processes	other membranes;cytosol;translational apparatus;nucleus	other molecular function	Pf01248	6130	RPL7A	hsa:6130; P11518; P62424; Q5T8U4	ENSG00000148303; ENSG00000280858	Cytoplasmic ribosomal proteins	Regulation of expression of SLITs and ROBOs; Nonsense Mediated Decay (NMD) enhanced by the Exon Junction Complex (EJC); L13a-mediated translational silencing of Ceruloplasmin expression; Formation of a pool of free 40S subunits; GTP hydrolysis and joining of the 60S ribosomal subunit; Major pathway of rRNA processing in the nucleolus and cytosol; SRP-dependent cotranslational protein targeting to…	99292.1	96103.8	142232	88455.9	80164.2	97188.1	107975	112287	120470	15271.8	11071.6	15406.1	8803.61	16443.2	8902.74	8350.72	10296.2	13424.8	High	High	High	High	High	High	High	High	High	High	High
High	P02458	Collagen alpha-1(II) chain OS=Homo sapiens OX=9606 GN=COL2A1 PE=1 SV=3	1	1	23	1	1487	141.7	6.92	34.07	cell organization and biogenesis;protein metabolism;other metabolic processes;developmental processes;other biological processes	non-structural extracellular;extracellular matrix;ER/Golgi;other cell component	signal transduction activity or receptor binding;extracellular structural activity;other molecular function	Pf00093, Pf01391, Pf01410	1280	COL2A1	A6NGA0; hsa:1280; P02458; Q12985; Q14009; Q14044; Q14045; Q14046; Q14047; Q14056; Q14058; Q16672; Q1JQ82; Q2V4X7; Q6LBY1; Q6LBY2; Q6LBY3; Q96IT5; Q99227; Q9UE38; Q9UE39; Q9UE40; Q9UE41; Q9UE42; Q9UE43	ENSG00000139219	Neural crest differentiation; Spinal cord injury; Focal adhesion; Interactions between LOXL4 and oxidative stress pathway; Focal adhesion: PI3K-Akt-mTOR-signaling pathway; PI3K-Akt signaling pathway; Endochondral ossification; Endochondral ossification with skeletal dysplasias	Immunoregulatory interactions between a Lymphoid and a non-Lymphoid cell; Integrin cell surface interactions; ECM proteoglycans; NCAM1 interactions; Non-integrin membrane-ECM interactions; MET activates PTK2 signaling; Collagen degradation; Signaling by PDGF; Assembly of collagen fibrils and other multimeric structures; Collagen chain trimerization	72183.8	93729.2	65042.2	57398.3	56300.2	64971	76808	44448.8	49163.9	6147.8	6635.56	3057.76	6115.97	4232.34	5710.88	6748.47	5309.79	5393.29	High	High	High	High	High	High	High	High	High	Not Found	Not Found
High	O15234	Protein CASC3 OS=Homo sapiens OX=9606 GN=CASC3 PE=1 SV=2	1	1	9	1	703	76.2	6.48	21.71	RNA metabolism OR transcription;other metabolic processes;transport;other biological processes	other membranes;cytosol;nucleus;other cell component	nucleic acid binding activity;other molecular function	Pf09405	22794	CASC3	A8K8R0; hsa:22794; O15234	ENSG00000108349		Transport of Mature mRNA derived from an Intron-Containing Transcript; mRNA 3'-end processing; RNA Polymerase II Transcription Termination; Regulation of expression of SLITs and ROBOs; mRNA Splicing - Major Pathway; Nonsense Mediated Decay (NMD) enhanced by the Exon Junction Complex (EJC)	40967.2	80534.4	44805.1	52176.9	16087.3	38599.4	80612.7	40445.2	46887.3	3716.24	2357.16	3512.21	3790.19	4187.1	2724.85	3215.63	2297.47	3922.39	High	Peak Found	High	High	Peak Found	Peak Found	High	High	High	Not Found	Peak Found
High	Q14247	Src substrate cortactin OS=Homo sapiens OX=9606 GN=CTTN PE=1 SV=2	35	16	187	16	550	61.5	5.4	438.72	cell adhesion;cell organization and biogenesis;transport;developmental processes;other biological processes	plasma membrane;other membranes;cytosol;cytoskeleton;ER/Golgi;other cell component	cytoskeletal activity;other molecular function	Pf02218, Pf14604	2017	CTTN	hsa:2017; Q14247; Q8N707; Q96H99	ENSG00000085733; ENSG00000288401	Pathogenic Escherichia coli infection; Hepatitis C and hepatocellular carcinoma	RHO GTPases activate PAKs; Clathrin-mediated endocytosis	1.0559e+06	675011	797895	897792	835352	883435	701654	665539	735337	105879	95261.6	90123.5	76071.7	94352.4	85357.9	71172	97029	80259.3	High	High	High	High	High	High	High	High	High	High	High
High	Q8NBS9	Thioredoxin domain-containing protein 5 OS=Homo sapiens OX=9606 GN=TXNDC5 PE=1 SV=2	9	4	63	4	432	47.6	5.97	20.51	transport;other biological processes	non-structural extracellular;ER/Golgi;other cytoplasmic organelle	other molecular function	Pf00085	81567	TXNDC5	B2RDM2; hsa:81567; Q5TCQ0; Q8NBS9; Q8ND33; Q8TCT2; Q9BVH9	ENSG00000239264	VEGFA-VEGFR2 signaling pathway	Neutrophil degranulation; Lysosome Vesicle Biogenesis; Golgi Associated Vesicle Biogenesis	63129	53395.5	62764.4	69567.4	71122.9	71500.1	38315.5	53460.5	93388.8	5772.27	5983.96	4321.02	5333.3	10944.4	6813.8	5372.55	7272.62	8316.29	High	High	High	High	High	High	High	High	High	High	High
High	A0A0B4J2D5	Putative glutamine amidotransferase-like class 1 domain-containing protein 3B, mitochondrial OS=Homo sapiens OX=9606 GN=GATD3B PE=5 SV=1	3	1	7	1	268	28.1	8.27	11.15		mitochondrion			8209	GATD3B	A0A0B4J2D5; A6NFJ6; A6NJY7; hsa:8209; O00650; O00660; O15011; O15012; P30042; P55346; P78474; Q92505; Q92507		Gastric cancer network 1		15337.4	26578.8	16478	45767.5	27364	30178.5	27485.5	24064.7	24273.7	2376.44	2859.31	3414.93	1965.75	3617.15	2883.3	3604.22	3027.9	1960.52	Peak Found	High	High	High	High	Peak Found	High	High	High	Not Found	Not Found
High	Q96SU4	Oxysterol-binding protein-related protein 9 OS=Homo sapiens OX=9606 GN=OSBPL9 PE=1 SV=2	1	1	4	1	736	83.1	6.18	2.05	other metabolic processes;transport	other membranes;cytosol;ER/Golgi;other cytoplasmic organelle;other cell component	transporter activity;other molecular function	Pf00169, Pf01237	114883	OSBPL9	B1AKJ8; B3KPQ4; D3DQ31; hsa:114883; Q5TFC0; Q6IA67; Q86YQ3; Q8NB17; Q8TAS8; Q96SK4; Q96SU4; Q9H9X2	ENSG00000117859		Synthesis of bile acids and bile salts	30885	25999.1	28015.3	20321.5	19432.9	17840.7	22480.8	24429	24059.8	2557.77	2481.8	2456.9	1838.26	1585.81	3060.53	1536.1	3781.32	2868.07	Peak Found	Peak Found	Peak Found	High	Peak Found	Peak Found	High	High	High	Not Found	Not Found
High	P47914	60S ribosomal protein L29 OS=Homo sapiens OX=9606 GN=RPL29 PE=1 SV=2	13	2	64	2	159	17.7	11.66	103.54	protein metabolism;other metabolic processes;developmental processes	cytosol;translational apparatus;other cell component	other molecular function	Pf01779	6159	RPL29	A8K0H3; B2R4M8; hsa:6159; P47914; Q6IPY3	ENSG00000162244	Cytoplasmic ribosomal proteins	L13a-mediated translational silencing of Ceruloplasmin expression; Formation of a pool of free 40S subunits; GTP hydrolysis and joining of the 60S ribosomal subunit; SRP-dependent cotranslational protein targeting to membrane; Regulation of expression of SLITs and ROBOs; Major pathway of rRNA processing in the nucleolus and cytosol; Nonsense Mediated Decay (NMD) enhanced by the Exon Junction Comp…	845710	1.57185e+06	1.24741e+06	898878	1.29657e+06	1.2085e+06	843890	1.06515e+06	1.03854e+06	72391.2	87186.1	116818	110989	121163	108435	74714.9	103903	155968	High	High	High	High	High	High	High	High	High	High	High
High	O00193	Small acidic protein OS=Homo sapiens OX=9606 GN=SMAP PE=1 SV=1	5	1	6	1	183	20.3	4.72	8.86				Pf15477	10944	SMAP	B2RD28; hsa:10944; O00193	ENSG00000110696			40552.6	53076.5	24346.6	25199	28759	22520.1	14083.9	16889.7	26058.7	3178.14	3686.62	1664.69	1625.19	2340.47	2282.94	1660.23	2200.99	1635.85	Peak Found	High	Peak Found	Peak Found	High	High	Peak Found	High	High	Not Found	Not Found
High	P40123	Adenylyl cyclase-associated protein 2 OS=Homo sapiens OX=9606 GN=CAP2 PE=1 SV=1	4	1	11	1	477	52.8	6.37	23.07	cell organization and biogenesis;signal transduction;other biological processes	plasma membrane;other membranes;other cell component	cytoskeletal activity;other molecular function	Pf01213, Pf08603	10486	CAP2	B2R5Y3; B7Z1C4; B7Z214; hsa:10486; P40123; Q6IAY2	ENSG00000112186	Ectoderm differentiation; Aryl hydrocarbon receptor pathway; Nuclear receptors meta-pathway	Role of ABL in ROBO-SLIT signaling	28882.3	24740.7	32802.6	40679.3	33896.4	28254.5	41947.9	32884.8	32991.9	1952.68	2161.98	3693.28	2411.28	3010.05	3965.77	3964.82	5312.44	2930	Peak Found	High	Peak Found	High	High	High	High	High	High	Not Found	Not Found
High	O60583	Cyclin-T2 OS=Homo sapiens OX=9606 GN=CCNT2 PE=1 SV=2	2	2	12	2	730	81	8.92	13.97	cell cycle OR cell proliferation;protein metabolism;RNA metabolism OR transcription;other metabolic processes;other biological processes	plasma membrane;other membranes;cytosol;nucleus;other cell component	enzyme regulator activity;nucleic acid binding activity;other molecular function	Pf00134	905	CCNT2	A8KA48; D3DP73; D3DP74; hsa:905; O60582; O60583; Q29R66; Q53SR4; Q5I1Y0	ENSG00000082258	Male infertility	Formation of RNA Pol II elongation complex ; Formation of HIV elongation complex in the absence of HIV Tat; HIV elongation arrest and recovery; Pausing and recovery of HIV elongation; RNA Polymerase II Pre-transcription Events; TP53 Regulates Transcription of DNA Repair Genes; SMAD2/SMAD3:SMAD4 heterotrimer regulates transcription; RNA polymerase II transcribes snRNA genes	30165.8	43407.6	56244.7	41151.5	89552	136853	49682.1	82551.2	250465	5665.63	3770.18	4950.94	8000.77	7881.92	6359.56	5455.76	6531.55	4976.35	High	High	High	High	High	Peak Found	High	High	High	Not Found	Not Found
High	Q9BXB4	Oxysterol-binding protein-related protein 11 OS=Homo sapiens OX=9606 GN=OSBPL11 PE=1 SV=2	1	1	6	1	747	83.6	7.06	5.18	transport;other biological processes	other membranes;cytosol;ER/Golgi;nucleus;other cytoplasmic organelle;other cell component	transporter activity;other molecular function	Pf00169, Pf01237	114885	OSBPL11	A8K9I7; hsa:114885; Q9BXB4	ENSG00000144909		RHOH GTPase cycle	3145.97	23090.1	29870.2	2209.84	36434.1	31598	1857.18	31168	25098.1	1514.06	2694.74	1513.12	2304.37	3827.53	2526.56	3037.41	4029.15	3153.41	Not Found	Peak Found	High	High	High	Peak Found	Not Found	High	High	Not Found	Not Found
High	Q7Z6E9	E3 ubiquitin-protein ligase RBBP6 OS=Homo sapiens OX=9606 GN=RBBP6 PE=1 SV=1	1	1	6	1	1792	201.4	9.64	0	protein metabolism;DNA metabolism;RNA metabolism OR transcription;other metabolic processes;stress response;developmental processes;other biological processes	cytosol;cytoskeleton;nucleus;other cell component	other molecular function	Pf04564, Pf08783, Pf13696	5930	RBBP6	hsa:5930; Q147T5; Q15290; Q6DKH4; Q6P4C2; Q6YNC9; Q7Z6E8; Q7Z6E9; Q8N0V2; Q96PH3; Q9H3I8; Q9H5M5; Q9NPX4	ENSG00000122257		Antigen processing: Ubiquitination & Proteasome degradation; RHOBTB1 GTPase cycle	29329.9	29716.2	30207.4	29877.8	30683.2	30896.7	24569.8	40673.1	28524.9	3707.99	2368.1	3657.49	1644.84	2442.93	2893.93	3875.79	4152.22	3015.55	Peak Found	Peak Found	High	Peak Found	High	High	Peak Found	High	High	Not Found	Not Found
High	Q8IYS1	Xaa-Arg dipeptidase OS=Homo sapiens OX=9606 GN=PM20D2 PE=1 SV=2	8	2	17	2	436	47.7	5.85	37.29	protein metabolism;other biological processes	nucleus	other molecular function	Pf01546, Pf07687	135293	PM20D2	B4DYJ2; hsa:135293; Q5T7J9; Q6MZV2; Q86XD9; Q8IYS1	ENSG00000146281			87355.1	46345.8	88206.1	63710.8	43575.9	40244.6	162029	50306.8	54893.8	4586.85	3159.32	3488.9	3718.88	2362.67	3364.27	2231.95	3544.83	6379.71	High	High	High	High	High	Peak Found	High	High	High	High	Peak Found
High	P56181-2	Isoform 2 of NADH dehydrogenase [ubiquinone] flavoprotein 3, mitochondrial OS=Homo sapiens OX=9606 GN=NDUFV3	8	3	26	3	473	51	9.17	49.14						NDUFV3	P56181-2				85700.1	73158.7	88946.4	147515	116064	58414.1	79333.1	69628.7	67514	8735.67	6027.66	7320.7	9378.45	8627.38	8017.25	9243.25	8555.82	7441.71	High	High	High	High	High	High	High	High	High	Not Found	Not Found
High	P46109	Crk-like protein OS=Homo sapiens OX=9606 GN=CRKL PE=1 SV=1	3	1	5	1	303	33.8	6.74	5.66	cell-cell signaling;cell organization and biogenesis;other metabolic processes;stress response;developmental processes;signal transduction;other biological processes	plasma membrane;other membranes;cytosol;nucleus;other cell component	signal transduction activity or receptor binding;other molecular function	Pf00017, Pf00018, Pf07653	1399	CRKL	A8KA44; D3DX35; hsa:1399; P46109	ENSG00000099942	B cell receptor signaling pathway; IL-3 signaling pathway; Kit receptor signaling pathway; Focal adhesion; Hepatocyte growth factor receptor signaling; MAPK signaling pathway; Chemokine signaling pathway; EGF/EGFR signaling pathway; 22q11.2 copy number variation syndrome; IL-2 signaling pathway; Interferon type I signaling pathways; ErbB signaling pathway; T-cell receptor signaling pathway	Regulation of signaling by CBL; Downstream signal transduction; Frs2-mediated activation; MET activates RAP1 and RAC1; MET receptor recycling; Erythropoietin activates RAS	35491.9	45531.7	42739	48966	35690.6	60316.7	24801.2	72642.9	40068.7	1494.98	2399.16	1711.9	2317.27	3172.31	3075.8	3276.21	3752.45	3784.7	Peak Found	Peak Found	High	High	Peak Found	High	Peak Found	Peak Found	High	Not Found	Peak Found
High	Q13428	Treacle protein OS=Homo sapiens OX=9606 GN=TCOF1 PE=1 SV=3	1	1	2	1	1488	152	9.04	1.94	RNA metabolism OR transcription;other metabolic processes;developmental processes;other biological processes	cytosol;nucleus	transporter activity;other molecular function	Pf03546	6949	TCOF1	A0JLU0; B4E111; hsa:6949; Q13428; Q6SC72; Q7Z5W9; Q96A52; Q99408; Q99860	ENSG00000070814			2581.88	29997.1	25864.8	2236.77	34053.5	39936	2021.4	22560	27601.6	3067.5	3186.14	3126.08	1521.19	1783.51	2835.05	2249.69	3206.51	8285.86	Not Found	Peak Found	High	Not Found	High	Peak Found	Not Found	Peak Found	Peak Found	Not Found	Not Found
High	O75533	Splicing factor 3B subunit 1 OS=Homo sapiens OX=9606 GN=SF3B1 PE=1 SV=3	2	2	38	2	1304	145.7	7.09	95.22	cell organization and biogenesis;RNA metabolism OR transcription;other metabolic processes;other biological processes	nucleus	nucleic acid binding activity;other molecular function	Pf08920	23451	SF3B1	E9PCH3; hsa:23451; O75533	ENSG00000115524	mRNA processing	mRNA Splicing - Major Pathway; B-WICH complex positively regulates rRNA expression; mRNA Splicing - Minor Pathway	220636	152676	170469	165756	163787	142670	173811	132154	199941	11168.4	4998.59	4871.87	11317.7	6401.89	8171.82	6955.5	4318.24	9627.61	High	High	High	High	High	High	High	High	High	Peak Found	High
High	Q7Z4W1	L-xylulose reductase OS=Homo sapiens OX=9606 GN=DCXR PE=1 SV=2	8	2	18	2	244	25.9	8.1	28.54	other metabolic processes;other biological processes	plasma membrane;other membranes;cytoskeleton;other cell component	other molecular function	Pf13561	51181	DCXR	hsa:51181; Q7Z4W1; Q9BTZ3; Q9UHY9	ENSG00000169738		Formation of xylulose-5-phosphate; Essential pentosuria	102566	173301	132227	93632.2	124779	148848	140846	113815	135328	5700.33	6281.47	6794.34	5400.48	5763.63	7804.22	6194	4640.27	6656.48	High	High	High	High	High	High	High	High	High	Not Found	Not Found
High	P10636-5	Isoform Tau-C of Microtubule-associated protein tau OS=Homo sapiens OX=9606 GN=MAPT	5	1	16	1	410	42.6	7.37	28.62						MAPT	P10636-5				109309	56721.9	72159.8	157000	42896	95361.9	90408.2	67498.4	61753.5	5896.12	10158.7	8047.32	11202.7	3387.53	3714.14	4713.04	3681.72	5711.35	High	High	High	High	High	High	High	High	High	Peak Found	Peak Found
High	Q7L2J0	7SK snRNA methylphosphate capping enzyme OS=Homo sapiens OX=9606 GN=MEPCE PE=1 SV=1	1	1	2	1	689	74.3	9.57	0	RNA metabolism OR transcription;other metabolic processes;other biological processes	nucleus;other cell component	nucleic acid binding activity;other molecular function	Pf06859, Pf13847	56257	MEPCE	B3KP86; D6W5V7; hsa:56257; Q7L2J0; Q9NPD4	ENSG00000146834	IL-18 signaling pathway		115405	59691.7	59785.9	67313.6	56864.1	57428.7	49321.9	47935.5	50852.1	1633.12	1689.48	2869.05	1814.08	3684.45	1887.75	3748.1	3302.82	4998.38	Peak Found	Peak Found	Peak Found	High	Peak Found	High	Peak Found	Peak Found	Peak Found	Not Found	Not Found
High	P30533	Alpha-2-macroglobulin receptor-associated protein OS=Homo sapiens OX=9606 GN=LRPAP1 PE=1 SV=1	32	15	155	15	357	41.4	8.78	256.45	transport;signal transduction;other biological processes	non-structural extracellular;plasma membrane;other membranes;ER/Golgi;other cytoplasmic organelle;other cell component	signal transduction activity or receptor binding;other molecular function	Pf06400, Pf06401	4043	LRPAP1	D3DVR9; hsa:4043; P30533; Q2M310; Q53HQ3; Q53HS6	ENSG00000163956			2.5344e+06	4.96785e+06	3.87386e+06	3.31232e+06	4.80814e+06	4.95433e+06	2.93952e+06	4.84253e+06	4.15747e+06	57586.1	51813.2	53246.7	50916.5	64992	49745.7	46625.3	53027.2	57074.9	High	High	High	High	High	High	High	High	High	Peak Found	Peak Found
[truncated: 15 more columns]
